# Supplementary material for: Bak Conformational Changes Induced by Ligand Binding: Insight into BH3 Domain Binding and Bak Homo-Oligomerization
Source: PubMed Central journal article supplement — Sci Rep. 2012 Feb 10;2:257. doi: 10.1038/srep00257 (PMC3277102; doi:10.1038/srep00257), 2012-02-10
Supplement: srep00257-s1.pdf [file srep00257-s1.pdf]

# Bak Conformational Changes Induced by Ligand Binding: Insight into BH3 Domain Binding and Bak Homo-Oligomerization

Yuan-Ping Pang<sup>1\*</sup>, Haiming Dai<sup>2</sup>, Alyson Smith<sup>1</sup>, X. Wei Meng<sup>2</sup>, Paula A. Schneider<sup>2</sup>, Scott H. Kaufmann<sup>1,2</sup>

<sup>1</sup>Department of Molecular Pharmacology and Experimental Therapeutics,

<sup>2</sup>Department of Oncology, Mayo Clinic, Rochester, MN 55905, USA

\*Correspondence should be addressed to Y.-P.P. ([pang@mayo.edu](mailto:pang@mayo.edu))

## Supplementary Information

Dataset S1. Average conformation of Noxa•Bak.

Dataset S2. Energy-minimized average conformation of Noxa•Bak.

Dataset S3. Bound-water-containing instantaneous conformation that is closest to the average conformation of Noxa•Bak.

Dataset S4. Average conformation of Bim•Bak from cluster 1 (19,500 out of 20,000 conformations).

Dataset S5. Energy-minimized average conformation of Bim•Bak from cluster 1 (19,500 out of 20,000 conformations).

Dataset S6. Bound-water-containing instantaneous conformation that is closest to the average conformation of Bim•Bak from cluster 1 (19,500 out of 20,000 conformations).

Dataset S7. Average conformation of Bim•Bak from cluster 2 (250 out of 20,000 conformations).

Dataset S8. Average conformation of Bim•Bak from cluster 3 (250 out of 20,000 conformations).

**Table S1. Cluster Analysis of the First- and Second-Round Simulations of the Noxa•Bak Complex.**

| Cluster      | No. of Conformers | E (kcal/mol) | Location of Y89 <sup>bak</sup><br>inside or outside of the groove |
|--------------|-------------------|--------------|-------------------------------------------------------------------|
| First Round  |                   |              |                                                                   |
| 1            | 1221              | -132         | inside                                                            |
| 2            | 46                | -137         | outside                                                           |
| 3            | 802               | -141         | outside                                                           |
| 4            | 1000              | -118         | inside                                                            |
| 5            | 400               | -111         | inside                                                            |
| 6            | 271               | -154         | outside                                                           |
| 7            | 260               | -126         | inside                                                            |
| Second Round |                   |              |                                                                   |
| 1            | 5100              | -132         | outside                                                           |
| 2            | 100               | -129         | outside                                                           |
