# Supplementary material for: Bak Conformational Changes Induced by Ligand Binding: Insight into BH3 Domain Binding and Bak Homo-Oligomerization
Source: PubMed Central journal article supplement — Sci Rep. 2012 Feb 10;2:257. doi: 10.1038/srep00257 (PMC3277102; doi:10.1038/srep00257), 2012-02-10
Supplement: srep00257-s2.pdf [file srep00257-s2.pdf]

Bak Conformational Changes Induced by Ligand Binding: Insight into BH3 Domain Binding and Bak Homo-Oligomerization

Yuan-Ping Pang, Haiming Dai, Alyson Smith, X. Wei Meng, Paula A. Schneider, Scott H. Kaufmann

Email Yuan-Ping Pang (pang@mayo.edu) for ascii files of the following coordinates.

```

DATASET 51
HEADER APOPTOSIS 28-JUN-10 XXXX
TITLE 3D MODEL OF BAK IN COMPLEX WITH THE BH3 DOMAIN OF NOXA
COMPND MOLECULE: APOPTOSIS REGULATOR BAK;
COMPND 2 SYNONYM: BCL-2 HOMOLOGOUS ANTAGONIST/KILLER, BCL-2- LIKE 7
COMPND 3 PROTEIN;
SOURCE MOLECULE 1 (RESIDUES 1-27): NOXA;
SOURCE 2 NCBI ACCESSION: Q13794;
SOURCE 3 ORGANISM_SCIENTIFIC: HOMO SAPIENS;
SOURCE 4 ORGANISM_COMMON: HUMAN;
SOURCE 5 MOLECULE 2 (RESIDUES 28-190): BAK;
SOURCE 6 NCBI ACCESSION: Q16611;
SOURCE 7 ORGANISM_SCIENTIFIC: HOMO SAPIENS;
SOURCE 8 ORGANISM_COMMON: HUMAN;
KEYWDS HETERODIMER, APOPTOSIS
EXPDTA THEORETICAL MODEL
JRNL AUTH Y-P PANG, H DAI, A SMITH, XW MENG, PA SCHNEIDER, SH KAUFMANN
JRNL TITL BAK CONFORMATIONAL CHANGES INDUCED BY LIGAND BINDING:
JRNL TITL 2 INSIGHT INTO BH3 DOMAIN BINDING AND BAK HOMO-OLIGOMERIZATION
JRNL REF SCIENTIFIC REPORTS, SUBMITTED
REMARK 220 THIS IS AN AVERAGE OF 5100 SIMILAR CONFORMERS IDENTIFIED
REMARK 220 BY CLUSTER ANALYSIS OF 52 10-NS MOLECULAR
REMARK 220 DYNAMICS SIMULATIONS OF BAK*NOXA USING PMEMD WITH THE
REMARK 220 FF99SB FORCE FIELD. NO ENERGY MINIMIZATION IS APPLIED
REMARK 220 TO THIS AVERAGE STRUCTURE.
MOL 1
ATOM 1 N ALA 1 -1.290 12.167 21.442
ATOM 2 H ALA 1 -1.330 12.286 21.538
ATOM 3 CA ALA 1 -1.195 12.060 21.274
ATOM 4 HA ALA 1 -1.114 11.784 21.203
ATOM 5 CB ALA 1 -1.533 12.552 21.427
ATOM 6 HB1 ALA 1 -1.625 12.659 21.446
ATOM 7 HB2 ALA 1 -1.629 12.659 21.468
ATOM 8 HB3 ALA 1 -1.587 12.692 21.479
ATOM 9 C ALA 1 -0.875 11.826 21.042
ATOM 10 O ALA 1 -0.890 11.814 20.919
ATOM 11 N GLU 2 -0.582 11.638 20.976
ATOM 12 H GLU 2 -0.582 11.654 21.084
ATOM 13 CA GLU 2 -0.260 11.439 20.753
ATOM 14 HA GLU 2 -0.356 11.633 20.797
ATOM 15 CB GLU 2 -0.429 11.733 21.177
ATOM 16 HB2 GLU 2 -0.331 11.643 21.156
ATOM 17 HB3 GLU 2 -0.496 11.763 21.334
ATOM 18 CG GLU 2 -0.640 12.113 21.425
ATOM 19 HG2 GLU 2 -0.617 12.151 21.386
ATOM 20 HG3 GLU 2 -0.657 12.211 21.346
ATOM 21 CD GLU 2 -0.856 12.312 21.833
ATOM 22 OE1 GLU 2 -0.950 12.448 22.005
ATOM 23 OE2 GLU 2 -0.934 12.339 21.989
ATOM 24 C GLU 2 0.371 10.708 20.043
ATOM 25 O GLU 2 0.880 11.146 19.420
ATOM 26 N LEU 3 0.323 9.592 20.108
ATOM 27 H LEU 3 -0.116 9.287 20.628
ATOM 28 CA LEU 3 0.908 8.784 19.485
ATOM 29 HA LEU 3 1.743 9.130 19.445
ATOM 30 CB LEU 3 0.893 7.671 20.181
ATOM 31 HB2 LEU 3 1.017 7.746 20.844
ATOM 32 HB3 LEU 3 0.309 7.315 20.152
ATOM 33 CG LEU 3 1.471 6.913 20.068
ATOM 34 HG LEU 3 1.232 6.765 19.473
ATOM 35 CD1 LEU 3 2.387 7.002 20.152
ATOM 36 HD11 LEU 3 2.638 6.976 20.226
ATOM 37 HD12 LEU 3 2.646 7.058 20.178
ATOM 38 HD13 LEU 3 2.551 7.033 20.104
ATOM 39 CD2 LEU 3 1.459 6.198 20.708
ATOM 40 HD21 LEU 3 1.487 6.060 20.851
ATOM 41 HD22 LEU 3 1.427 6.018 20.864
ATOM 42 HD23 LEU 3 1.453 5.990 20.871
ATOM 43 C LEU 3 0.468 8.600 18.230
ATOM 44 O LEU 3 1.079 8.288 17.480
ATOM 45 N GLU 4 -0.577 8.839 17.973
ATOM 46 H GLU 4 -1.037 9.067 18.626
ATOM 47 CA GLU 4 -1.100 8.782 16.789
ATOM 48 HA GLU 4 -0.839 7.981 16.389
ATOM 49 CB GLU 4 -2.445 8.680 16.926
ATOM 50 HB2 GLU 4 -2.768 8.826 16.873
ATOM 51 HB3 GLU 4 -2.628 8.524 16.827
ATOM 52 CG GLU 4 -3.130 8.569 17.235
ATOM 53 HG2 GLU 4 -3.078 8.641 17.170
ATOM 54 HG3 GLU 4 -2.985 8.457 17.011
ATOM 55 CD GLU 4 -4.092 8.507 17.924
ATOM 56 OE1 GLU 4 -4.475 8.521 18.205
ATOM 57 OE2 GLU 4 -4.480 8.441 18.198
ATOM 58 C GLU 4 -0.662 9.842 15.916
ATOM 59 O GLU 4 -0.631 9.690 14.799
ATOM 60 N VAL 5 -0.281 10.905 16.411
ATOM 61 H VAL 5 -0.309 10.962 17.330
ATOM 62 CA VAL 5 0.212 11.993 15.681
ATOM 63 HA VAL 5 -0.302 12.040 14.777
ATOM 64 CB VAL 5 -0.021 13.253 16.411
ATOM 65 HB VAL 5 0.346 13.410 16.762
ATOM 66 CG1 VAL 5 -0.133 14.090 16.108
ATOM 67 HG11 VAL 5 -0.149 14.307 16.017
ATOM 68 HG12 VAL 5 -0.180 14.279 16.023
ATOM 69 HG13 VAL 5 -0.149 14.309 16.070
ATOM 70 CG2 VAL 5 -0.673 13.540 16.977
ATOM 71 HG21 VAL 5 -0.801 13.625 17.085
ATOM 72 HG22 VAL 5 -0.879 13.617 17.135
ATOM 73 HG23 VAL 5 -0.813 13.600 17.138
    
```

|      |     |      |     |    |        |        |        |
|------|-----|------|-----|----|--------|--------|--------|
| ATOM | 74  | C    | VAL | 5  | 1.619  | 11.832 | 15.317 |
| ATOM | 75  | O    | VAL | 5  | 2.013  | 12.200 | 14.270 |
| ATOM | 76  | N    | GLU | 6  | 2.379  | 11.221 | 16.124 |
| ATOM | 77  | H    | GLU | 6  | 2.011  | 10.946 | 16.966 |
| ATOM | 78  | CA   | GLU | 6  | 3.725  | 10.925 | 15.835 |
| ATOM | 79  | HA   | GLU | 6  | 4.189  | 11.796 | 15.521 |
| ATOM | 80  | CB   | GLU | 6  | 4.385  | 10.482 | 17.072 |
| ATOM | 81  | HB2  | GLU | 6  | 4.156  | 10.620 | 17.647 |
| ATOM | 82  | HB3  | GLU | 6  | 4.468  | 9.862  | 17.206 |
| ATOM | 83  | CG   | GLU | 6  | 5.250  | 10.673 | 17.374 |
| ATOM | 84  | HG2  | GLU | 6  | 5.209  | 10.495 | 17.369 |
| ATOM | 85  | HG3  | GLU | 6  | 5.417  | 10.709 | 17.228 |
| ATOM | 86  | CD   | GLU | 6  | 5.953  | 11.036 | 17.900 |
| ATOM | 87  | OE1  | GLU | 6  | 6.235  | 11.114 | 18.076 |
| ATOM | 88  | OE2  | GLU | 6  | 6.245  | 11.249 | 18.139 |
| ATOM | 89  | C    | GLU | 6  | 3.881  | 9.926  | 14.711 |
| ATOM | 90  | O    | GLU | 6  | 4.680  | 10.071 | 13.877 |
| ATOM | 91  | N    | CYS | 7  | 3.077  | 8.956  | 14.630 |
| ATOM | 92  | H    | CYS | 7  | 2.451  | 8.880  | 15.343 |
| ATOM | 93  | CA   | CYS | 7  | 3.070  | 8.000  | 13.552 |
| ATOM | 94  | HA   | CYS | 7  | 4.063  | 7.654  | 13.389 |
| ATOM | 95  | CB   | CYS | 7  | 2.225  | 6.829  | 13.960 |
| ATOM | 96  | HB2  | CYS | 7  | 1.821  | 6.807  | 14.486 |
| ATOM | 97  | HB3  | CYS | 7  | 1.774  | 6.588  | 13.578 |
| ATOM | 98  | SG   | CYS | 7  | 2.641  | 5.849  | 14.205 |
| ATOM | 99  | HG   | CYS | 7  | 2.544  | 5.955  | 14.457 |
| ATOM | 100 | C    | CYS | 7  | 2.610  | 8.605  | 12.242 |
| ATOM | 101 | O    | CYS | 7  | 3.198  | 8.349  | 11.220 |
| ATOM | 102 | N    | ALA | 8  | 1.616  | 9.467  | 12.261 |
| ATOM | 103 | H    | ALA | 8  | 1.162  | 9.636  | 13.117 |
| ATOM | 104 | CA   | ALA | 8  | 1.176  | 10.195 | 11.089 |
| ATOM | 105 | HA   | ALA | 8  | 0.968  | 9.492  | 10.311 |
| ATOM | 106 | CB   | ALA | 8  | -0.101 | 10.916 | 11.421 |
| ATOM | 107 | HB1  | ALA | 8  | -0.428 | 11.077 | 11.462 |
| ATOM | 108 | HB2  | ALA | 8  | -0.411 | 11.071 | 11.528 |
| ATOM | 109 | HB3  | ALA | 8  | -0.391 | 11.125 | 11.494 |
| ATOM | 110 | C    | ALA | 8  | 2.233  | 11.152 | 10.554 |
| ATOM | 111 | O    | ALA | 8  | 2.421  | 11.241 | 9.361  |
| ATOM | 112 | N    | THR | 9  | 2.973  | 11.813 | 11.422 |
| ATOM | 113 | H    | THR | 9  | 2.756  | 11.716 | 12.380 |
| ATOM | 114 | CA   | THR | 9  | 4.082  | 12.687 | 11.049 |
| ATOM | 115 | HA   | THR | 9  | 3.737  | 13.371 | 10.297 |
| ATOM | 116 | CB   | THR | 9  | 4.555  | 13.506 | 12.234 |
| ATOM | 117 | HB   | THR | 9  | 4.980  | 12.990 | 12.879 |
| ATOM | 118 | CG2  | THR | 9  | 5.392  | 14.496 | 11.963 |
| ATOM | 119 | HG21 | THR | 9  | 5.613  | 14.721 | 11.889 |
| ATOM | 120 | HG22 | THR | 9  | 5.599  | 14.742 | 11.924 |
| ATOM | 121 | HG23 | THR | 9  | 5.588  | 14.744 | 11.890 |
| ATOM | 122 | OG1  | THR | 9  | 3.653  | 14.071 | 12.819 |
| ATOM | 123 | HG1  | THR | 9  | 3.352  | 13.816 | 13.363 |
| ATOM | 124 | C    | THR | 9  | 5.230  | 11.911 | 10.438 |
| ATOM | 125 | O    | THR | 9  | 5.756  | 12.320 | 9.424  |
| ATOM | 126 | N    | GLN | 10 | 5.576  | 10.754 | 10.980 |
| ATOM | 127 | H    | GLN | 10 | 5.124  | 10.471 | 11.816 |
| ATOM | 128 | CA   | GLN | 10 | 6.595  | 9.882  | 10.418 |
| ATOM | 129 | HA   | GLN | 10 | 7.489  | 10.458 | 10.277 |
| ATOM | 130 | CB   | GLN | 10 | 6.906  | 8.760  | 11.397 |
| ATOM | 131 | HB2  | GLN | 10 | 6.552  | 8.693  | 11.992 |
| ATOM | 132 | HB3  | GLN | 10 | 6.826  | 8.118  | 11.190 |
| ATOM | 133 | CG   | GLN | 10 | 7.815  | 8.578  | 11.862 |
| ATOM | 134 | HG2  | GLN | 10 | 7.944  | 8.591  | 11.572 |
| ATOM | 135 | HG3  | GLN | 10 | 7.972  | 8.879  | 11.993 |
| ATOM | 136 | CD   | GLN | 10 | 8.355  | 7.960  | 12.551 |
| ATOM | 137 | OE1  | GLN | 10 | 8.253  | 7.925  | 12.944 |
| ATOM | 138 | NE2  | GLN | 10 | 8.952  | 7.456  | 12.724 |
| ATOM | 139 | HE21 | GLN | 10 | 9.055  | 7.477  | 12.415 |
| ATOM | 140 | HE22 | GLN | 10 | 9.306  | 7.057  | 13.176 |
| ATOM | 141 | C    | GLN | 10 | 6.203  | 9.342  | 9.047  |
| ATOM | 142 | O    | GLN | 10 | 7.021  | 9.323  | 8.150  |
| ATOM | 143 | N    | LEU | 11 | 4.950  | 8.974  | 8.845  |
| ATOM | 144 | H    | LEU | 11 | 4.338  | 8.971  | 9.626  |
| ATOM | 145 | CA   | LEU | 11 | 4.429  | 8.527  | 7.559  |
| ATOM | 146 | HA   | LEU | 11 | 5.095  | 7.770  | 7.184  |
| ATOM | 147 | CB   | LEU | 11 | 3.060  | 7.897  | 7.789  |
| ATOM | 148 | HB2  | LEU | 11 | 3.124  | 7.224  | 8.569  |
| ATOM | 149 | HB3  | LEU | 11 | 2.403  | 8.629  | 8.083  |
| ATOM | 150 | CG   | LEU | 11 | 2.447  | 7.185  | 6.651  |
| ATOM | 151 | HG   | LEU | 11 | 2.368  | 7.829  | 5.955  |
| ATOM | 152 | CD1  | LEU | 11 | 3.114  | 6.086  | 6.166  |
| ATOM | 153 | HD11 | LEU | 11 | 3.248  | 5.853  | 5.975  |
| ATOM | 154 | HD12 | LEU | 11 | 3.235  | 5.752  | 6.098  |
| ATOM | 155 | HD13 | LEU | 11 | 3.342  | 5.852  | 6.056  |
| ATOM | 156 | CD2  | LEU | 11 | 1.195  | 6.670  | 6.928  |
| ATOM | 157 | HD21 | LEU | 11 | 0.904  | 6.531  | 7.038  |
| ATOM | 158 | HD22 | LEU | 11 | 0.872  | 6.600  | 6.987  |
| ATOM | 159 | HD23 | LEU | 11 | 0.896  | 6.511  | 6.958  |
| ATOM | 160 | C    | LEU | 11 | 4.398  | 9.648  | 6.518  |
| ATOM | 161 | O    | LEU | 11 | 4.725  | 9.419  | 5.367  |
| ATOM | 162 | N    | ARG | 12 | 4.085  | 10.875 | 6.918  |
| ATOM | 163 | H    | ARG | 12 | 3.790  | 10.982 | 7.860  |
| ATOM | 164 | CA   | ARG | 12 | 4.127  | 12.061 | 6.063  |
| ATOM | 165 | HA   | ARG | 12 | 3.606  | 11.843 | 5.148  |
| ATOM | 166 | CB   | ARG | 12 | 3.418  | 13.208 | 6.763  |
| ATOM | 167 | HB2  | ARG | 12 | 2.813  | 12.963 | 7.207  |
| ATOM | 168 | HB3  | ARG | 12 | 3.873  | 13.612 | 7.277  |
| ATOM | 169 | CG   | ARG | 12 | 2.877  | 14.145 | 6.174  |
| ATOM | 170 | HG2  | ARG | 12 | 3.410  | 14.380 | 5.707  |
| ATOM | 171 | HG3  | ARG | 12 | 2.404  | 13.801 | 5.736  |
| ATOM | 172 | CD   | ARG | 12 | 2.214  | 15.236 | 6.793  |
| ATOM | 173 | HD2  | ARG | 12 | 2.032  | 15.873 | 6.184  |
| ATOM | 174 | HD3  | ARG | 12 | 1.455  | 14.952 | 7.088  |
| ATOM | 175 | NE   | ARG | 12 | 2.797  | 15.837 | 7.745  |
| ATOM | 176 | HE   | ARG | 12 | 3.494  | 16.099 | 7.612  |
| ATOM | 177 | CZ   | ARG | 12 | 2.508  | 16.118 | 8.748  |
| ATOM | 178 | NH1  | ARG | 12 | 1.631  | 15.859 | 9.068  |

|      |     |      |     |    |        |        |        |
|------|-----|------|-----|----|--------|--------|--------|
| ATOM | 179 | HH11 | ARG | 12 | 1.111  | 15.452 | 8.554  |
| ATOM | 180 | HH12 | ARG | 12 | 1.446  | 16.127 | 9.836  |
| ATOM | 181 | NH2  | ARG | 12 | 3.116  | 16.678 | 9.472  |
| ATOM | 182 | HH21 | ARG | 12 | 3.785  | 16.920 | 9.262  |
| ATOM | 183 | HH22 | ARG | 12 | 2.892  | 16.901 | 10.222 |
| ATOM | 184 | C    | ARG | 12 | 5.538  | 12.420 | 5.642  |
| ATOM | 185 | O    | ARG | 12 | 5.769  | 12.638 | 4.469  |
| ATOM | 186 | N    | ARG | 13 | 6.491  | 12.392 | 6.562  |
| ATOM | 187 | H    | ARG | 13 | 6.210  | 12.222 | 7.499  |
| ATOM | 188 | CA   | ARG | 13 | 7.911  | 12.612 | 6.287  |
| ATOM | 189 | HA   | ARG | 13 | 8.021  | 13.538 | 5.755  |
| ATOM | 190 | CB   | ARG | 13 | 8.676  | 12.713 | 7.596  |
| ATOM | 191 | HB2  | ARG | 13 | 8.420  | 12.264 | 8.180  |
| ATOM | 192 | HB3  | ARG | 13 | 9.416  | 12.501 | 7.551  |
| ATOM | 193 | CG   | ARG | 13 | 8.813  | 13.713 | 8.177  |
| ATOM | 194 | HG2  | ARG | 13 | 9.100  | 14.134 | 7.694  |
| ATOM | 195 | HG3  | ARG | 13 | 8.139  | 13.928 | 8.202  |
| ATOM | 196 | CD   | ARG | 13 | 9.496  | 13.861 | 9.390  |
| ATOM | 197 | HD2  | ARG | 13 | 9.452  | 13.530 | 9.730  |
| ATOM | 198 | HD3  | ARG | 13 | 10.012 | 13.887 | 9.460  |
| ATOM | 199 | NE   | ARG | 13 | 9.534  | 14.409 | 10.005 |
| ATOM | 200 | HE   | ARG | 13 | 9.458  | 14.692 | 9.653  |
| ATOM | 201 | CZ   | ARG | 13 | 9.679  | 14.579 | 10.978 |
| ATOM | 202 | NH1  | ARG | 13 | 9.808  | 14.272 | 11.550 |
| ATOM | 203 | HH11 | ARG | 13 | 9.822  | 13.897 | 11.274 |
| ATOM | 204 | HH12 | ARG | 13 | 9.915  | 14.425 | 12.284 |
| ATOM | 205 | NH2  | ARG | 13 | 9.693  | 15.073 | 11.408 |
| ATOM | 206 | HH21 | ARG | 13 | 9.612  | 15.330 | 11.010 |
| ATOM | 207 | HH22 | ARG | 13 | 9.803  | 15.196 | 12.146 |
| ATOM | 208 | C    | ARG | 13 | 8.502  | 11.550 | 5.376  |
| ATOM | 209 | O    | ARG | 13 | 9.230  | 11.888 | 4.467  |
| ATOM | 210 | N    | PHE | 14 | 8.137  | 10.297 | 5.553  |
| ATOM | 211 | H    | PHE | 14 | 7.577  | 10.087 | 6.344  |
| ATOM | 212 | CA   | PHE | 14 | 8.514  | 9.212  | 4.659  |
| ATOM | 213 | HA   | PHE | 14 | 9.583  | 9.214  | 4.550  |
| ATOM | 214 | CB   | PHE | 14 | 8.105  | 7.888  | 5.282  |
| ATOM | 215 | HB2  | PHE | 14 | 8.545  | 7.812  | 6.236  |
| ATOM | 216 | HB3  | PHE | 14 | 7.064  | 7.878  | 5.428  |
| ATOM | 217 | CG   | PHE | 14 | 8.473  | 6.675  | 4.518  |
| ATOM | 218 | CD1  | PHE | 14 | 8.851  | 6.114  | 4.236  |
| ATOM | 219 | HD1  | PHE | 14 | 8.885  | 6.542  | 4.555  |
| ATOM | 220 | CE1  | PHE | 14 | 9.184  | 4.993  | 3.539  |
| ATOM | 221 | HE1  | PHE | 14 | 9.470  | 4.568  | 3.330  |
| ATOM | 222 | CZ   | PHE | 14 | 9.142  | 4.427  | 3.121  |
| ATOM | 223 | HZ   | PHE | 14 | 9.397  | 3.567  | 2.595  |
| ATOM | 224 | CE2  | PHE | 14 | 8.768  | 4.980  | 3.399  |
| ATOM | 225 | HE2  | PHE | 14 | 8.735  | 4.544  | 3.082  |
| ATOM | 226 | CD2  | PHE | 14 | 8.435  | 6.101  | 4.095  |
| ATOM | 227 | HD2  | PHE | 14 | 8.150  | 6.518  | 4.307  |
| ATOM | 228 | C    | PHE | 14 | 7.924  | 9.391  | 3.265  |
| ATOM | 229 | O    | PHE | 14 | 8.630  | 9.252  | 2.287  |
| ATOM | 230 | N    | GLY | 15 | 6.660  | 9.767  | 3.166  |
| ATOM | 231 | H    | GLY | 15 | 6.126  | 9.837  | 3.999  |
| ATOM | 232 | CA   | GLY | 15 | 5.997  | 10.062 | 1.908  |
| ATOM | 233 | HA2  | GLY | 15 | 6.023  | 9.196  | 1.282  |
| ATOM | 234 | HA3  | GLY | 15 | 4.976  | 10.303 | 2.119  |
| ATOM | 235 | C    | GLY | 15 | 6.609  | 11.219 | 1.140  |
| ATOM | 236 | O    | GLY | 15 | 6.777  | 11.131 | -0.055 |
| ATOM | 237 | N    | ASP | 16 | 7.021  | 12.271 | 1.815  |
| ATOM | 238 | H    | ASP | 16 | 6.816  | 12.309 | 2.784  |
| ATOM | 239 | CA   | ASP | 16 | 7.699  | 13.404 | 1.200  |
| ATOM | 240 | HA   | ASP | 16 | 7.167  | 13.679 | 0.309  |
| ATOM | 241 | CB   | ASP | 16 | 7.666  | 14.587 | 2.147  |
| ATOM | 242 | HB2  | ASP | 16 | 7.836  | 14.395 | 3.023  |
| ATOM | 243 | HB3  | ASP | 16 | 8.294  | 15.167 | 1.929  |
| ATOM | 244 | CG   | ASP | 16 | 6.593  | 15.288 | 2.196  |
| ATOM | 245 | OD1  | ASP | 16 | 6.260  | 15.680 | 2.415  |
| ATOM | 246 | OD2  | ASP | 16 | 6.082  | 15.513 | 2.004  |
| ATOM | 247 | C    | ASP | 16 | 9.126  | 13.086 | 0.764  |
| ATOM | 248 | O    | ASP | 16 | 9.563  | 13.554 | -0.267 |
| ATOM | 249 | N    | LYS | 17 | 9.838  | 12.237 | 1.487  |
| ATOM | 250 | H    | LYS | 17 | 9.439  | 11.913 | 2.332  |
| ATOM | 251 | CA   | LYS | 17 | 11.143 | 11.717 | 1.081  |
| ATOM | 252 | HA   | LYS | 17 | 11.758 | 12.540 | 0.771  |
| ATOM | 253 | CB   | LYS | 17 | 11.809 | 11.037 | 2.263  |
| ATOM | 254 | HB2  | LYS | 17 | 11.544 | 11.174 | 2.942  |
| ATOM | 255 | HB3  | LYS | 17 | 11.790 | 10.312 | 2.279  |
| ATOM | 256 | CG   | LYS | 17 | 12.870 | 11.153 | 2.523  |
| ATOM | 257 | HG2  | LYS | 17 | 13.151 | 10.993 | 2.167  |
| ATOM | 258 | HG3  | LYS | 17 | 12.858 | 11.611 | 2.407  |
| ATOM | 259 | CD   | LYS | 17 | 13.574 | 10.852 | 3.432  |
| ATOM | 260 | HD2  | LYS | 17 | 13.424 | 10.819 | 3.712  |
| ATOM | 261 | HD3  | LYS | 17 | 13.672 | 10.537 | 3.457  |
| ATOM | 262 | CE   | LYS | 17 | 14.353 | 11.023 | 3.915  |
| ATOM | 263 | HE2  | LYS | 17 | 14.450 | 11.005 | 3.792  |
| ATOM | 264 | HE3  | LYS | 17 | 14.332 | 11.222 | 3.847  |
| ATOM | 265 | NZ   | LYS | 17 | 14.999 | 10.954 | 4.626  |
| ATOM | 266 | HZ1  | LYS | 17 | 15.155 | 10.927 | 4.806  |
| ATOM | 267 | HZ2  | LYS | 17 | 15.166 | 10.930 | 4.781  |
| ATOM | 268 | HZ3  | LYS | 17 | 15.165 | 10.954 | 4.822  |
| ATOM | 269 | C    | LYS | 17 | 11.038 | 10.799 | -0.122 |
| ATOM | 270 | O    | LYS | 17 | 11.854 | 10.869 | -1.009 |
| ATOM | 271 | N    | LEU | 18 | 9.996  | 10.003 | -0.204 |
| ATOM | 272 | H    | LEU | 18 | 9.391  | 9.971  | 0.576  |
| ATOM | 273 | CA   | LEU | 18 | 9.689  | 9.169  | -1.352 |
| ATOM | 274 | HA   | LEU | 18 | 10.586 | 8.638  | -1.620 |
| ATOM | 275 | CB   | LEU | 18 | 8.627  | 8.154  | -0.948 |
| ATOM | 276 | HB2  | LEU | 18 | 8.788  | 7.841  | -0.107 |
| ATOM | 277 | HB3  | LEU | 18 | 7.795  | 8.535  | -0.903 |
| ATOM | 278 | CG   | LEU | 18 | 8.429  | 7.035  | -1.669 |
| ATOM | 279 | HG   | LEU | 18 | 8.227  | 7.380  | -2.174 |
| ATOM | 280 | CD1  | LEU | 18 | 9.091  | 6.256  | -1.915 |
| ATOM | 281 | HD11 | LEU | 18 | 9.225  | 6.049  | -1.944 |
| ATOM | 282 | HD12 | LEU | 18 | 9.240  | 6.058  | -2.064 |
| ATOM | 283 | HD13 | LEU | 18 | 9.290  | 6.091  | -1.930 |

|      |     |      |     |    |        |        |         |
|------|-----|------|-----|----|--------|--------|---------|
| ATOM | 284 | CD2  | LEU | 18 | 7.784  | 6.167  | -1.447  |
| ATOM | 285 | HD21 | LEU | 18 | 7.605  | 5.984  | -1.404  |
| ATOM | 286 | HD22 | LEU | 18 | 7.616  | 5.920  | -1.418  |
| ATOM | 287 | HD23 | LEU | 18 | 7.658  | 5.966  | -1.364  |
| ATOM | 288 | C    | LEU | 18 | 9.283  | 9.996  | -2.568  |
| ATOM | 289 | O    | LEU | 18 | 9.658  | 9.670  | -3.660  |
| ATOM | 290 | N    | ASN | 19 | 8.597  | 11.108 | -2.394  |
| ATOM | 291 | H    | ASN | 19 | 8.284  | 11.308 | -1.487  |
| ATOM | 292 | CA   | ASN | 19 | 8.239  | 12.021 | -3.458  |
| ATOM | 293 | HA   | ASN | 19 | 7.736  | 11.465 | -4.204  |
| ATOM | 294 | CB   | ASN | 19 | 7.289  | 13.075 | -2.929  |
| ATOM | 295 | HB2  | ASN | 19 | 6.531  | 12.628 | -2.363  |
| ATOM | 296 | HB3  | ASN | 19 | 7.796  | 13.729 | -2.302  |
| ATOM | 297 | CG   | ASN | 19 | 6.635  | 13.857 | -3.990  |
| ATOM | 298 | OD1  | ASN | 19 | 6.131  | 13.423 | -4.795  |
| ATOM | 299 | ND2  | ASN | 19 | 6.619  | 15.020 | -4.033  |
| ATOM | 300 | HD21 | ASN | 19 | 6.178  | 15.531 | -4.725  |
| ATOM | 301 | HD22 | ASN | 19 | 7.014  | 15.383 | -3.369  |
| ATOM | 302 | C    | ASN | 19 | 9.441  | 12.642 | -4.116  |
| ATOM | 303 | O    | ASN | 19 | 9.471  | 12.792 | -5.286  |
| ATOM | 304 | N    | PHE | 20 | 10.464 | 12.934 | -3.387  |
| ATOM | 305 | H    | PHE | 20 | 10.370 | 12.824 | -2.430  |
| ATOM | 306 | CA   | PHE | 20 | 11.714 | 13.401 | -3.908  |
| ATOM | 307 | HA   | PHE | 20 | 11.506 | 14.099 | -4.637  |
| ATOM | 308 | CB   | PHE | 20 | 12.445 | 14.079 | -2.850  |
| ATOM | 309 | HB2  | PHE | 20 | 12.052 | 14.592 | -2.385  |
| ATOM | 310 | HB3  | PHE | 20 | 12.679 | 13.564 | -2.388  |
| ATOM | 311 | CG   | PHE | 20 | 13.368 | 14.774 | -2.987  |
| ATOM | 312 | CD1  | PHE | 20 | 13.861 | 14.996 | -3.088  |
| ATOM | 313 | HD1  | PHE | 20 | 13.589 | 14.674 | -3.064  |
| ATOM | 314 | CE1  | PHE | 20 | 14.711 | 15.640 | -3.218  |
| ATOM | 315 | HE1  | PHE | 20 | 15.086 | 15.808 | -3.293  |
| ATOM | 316 | CZ   | PHE | 20 | 15.074 | 16.066 | -3.248  |
| ATOM | 317 | HZ   | PHE | 20 | 15.723 | 16.558 | -3.348  |
| ATOM | 318 | CE2  | PHE | 20 | 14.586 | 15.849 | -3.144  |
| ATOM | 319 | HE2  | PHE | 20 | 14.864 | 16.176 | -3.167  |
| ATOM | 320 | CD2  | PHE | 20 | 13.736 | 15.205 | -3.014  |
| ATOM | 321 | HD2  | PHE | 20 | 13.368 | 15.043 | -2.935  |
| ATOM | 322 | C    | PHE | 20 | 12.560 | 12.339 | -4.559  |
| ATOM | 323 | O    | PHE | 20 | 13.228 | 12.599 | -5.484  |
| ATOM | 324 | N    | ARG | 21 | 12.494 | 11.128 | -4.131  |
| ATOM | 325 | H    | ARG | 21 | 11.941 | 10.985 | -3.368  |
| ATOM | 326 | CA   | ARG | 21 | 13.205 | 10.011 | -4.688  |
| ATOM | 327 | HA   | ARG | 21 | 14.177 | 10.296 | -4.874  |
| ATOM | 328 | CB   | ARG | 21 | 13.237 | 8.919  | -3.740  |
| ATOM | 329 | HB2  | ARG | 21 | 13.287 | 9.144  | -3.014  |
| ATOM | 330 | HB3  | ARG | 21 | 12.597 | 8.531  | -3.726  |
| ATOM | 331 | CG   | ARG | 21 | 14.054 | 8.039  | -3.754  |
| ATOM | 332 | HG2  | ARG | 21 | 13.922 | 7.700  | -3.856  |
| ATOM | 333 | HG3  | ARG | 21 | 14.260 | 8.114  | -4.062  |
| ATOM | 334 | CD   | ARG | 21 | 14.761 | 7.501  | -3.183  |
| ATOM | 335 | HD2  | ARG | 21 | 15.122 | 7.967  | -3.079  |
| ATOM | 336 | HD3  | ARG | 21 | 14.402 | 7.487  | -2.632  |
| ATOM | 337 | NE   | ARG | 21 | 15.416 | 6.396  | -3.480  |
| ATOM | 338 | HE   | ARG | 21 | 15.068 | 5.783  | -3.616  |
| ATOM | 339 | CZ   | ARG | 21 | 16.422 | 6.105  | -3.576  |
| ATOM | 340 | NH1  | ARG | 21 | 17.001 | 6.790  | -3.409  |
| ATOM | 341 | HH11 | ARG | 21 | 16.710 | 7.578  | -3.160  |
| ATOM | 342 | HH12 | ARG | 21 | 17.759 | 6.517  | -3.502  |
| ATOM | 343 | NH2  | ARG | 21 | 16.880 | 5.090  | -3.851  |
| ATOM | 344 | HH21 | ARG | 21 | 16.474 | 4.529  | -3.968  |
| ATOM | 345 | HH22 | ARG | 21 | 17.640 | 4.872  | -3.928  |
| ATOM | 346 | C    | ARG | 21 | 12.692 | 9.578  | -5.959  |
| ATOM | 347 | O    | ARG | 21 | 13.398 | 9.154  | -6.722  |
| ATOM | 348 | N    | GLN | 22 | 11.488 | 9.742  | -6.218  |
| ATOM | 349 | H    | GLN | 22 | 10.965 | 10.071 | -5.545  |
| ATOM | 350 | CA   | GLN | 22 | 10.871 | 9.439  | -7.398  |
| ATOM | 351 | HA   | GLN | 22 | 11.130 | 8.542  | -7.621  |
| ATOM | 352 | CB   | GLN | 22 | 9.475  | 9.490  | -7.283  |
| ATOM | 353 | HB2  | GLN | 22 | 9.148  | 10.040 | -6.747  |
| ATOM | 354 | HB3  | GLN | 22 | 9.085  | 9.691  | -7.959  |
| ATOM | 355 | CG   | GLN | 22 | 9.015  | 8.529  | -6.991  |
| ATOM | 356 | HG2  | GLN | 22 | 9.249  | 8.139  | -7.111  |
| ATOM | 357 | HG3  | GLN | 22 | 9.025  | 8.340  | -6.571  |
| ATOM | 358 | CD   | GLN | 22 | 8.210  | 8.325  | -7.104  |
| ATOM | 359 | OE1  | GLN | 22 | 7.771  | 8.753  | -7.195  |
| ATOM | 360 | NE2  | GLN | 22 | 7.980  | 7.669  | -7.111  |
| ATOM | 361 | HE21 | GLN | 22 | 7.449  | 7.545  | -7.208  |
| ATOM | 362 | HE22 | GLN | 22 | 8.330  | 7.301  | -7.054  |
| ATOM | 363 | C    | GLN | 22 | 11.254 | 10.213 | -8.458  |
| ATOM | 364 | O    | GLN | 22 | 11.265 | 9.819  | -9.458  |
| ATOM | 365 | N    | LYS | 23 | 11.622 | 11.287 | -8.251  |
| ATOM | 366 | H    | LYS | 23 | 11.561 | 11.568 | -7.420  |
| ATOM | 367 | CA   | LYS | 23 | 12.102 | 12.073 | -9.166  |
| ATOM | 368 | HA   | LYS | 23 | 11.595 | 11.988 | -9.987  |
| ATOM | 369 | CB   | LYS | 23 | 11.975 | 13.327 | -8.791  |
| ATOM | 370 | HB2  | LYS | 23 | 11.867 | 13.449 | -8.268  |
| ATOM | 371 | HB3  | LYS | 23 | 12.403 | 13.704 | -8.806  |
| ATOM | 372 | CG   | LYS | 23 | 11.411 | 13.926 | -9.104  |
| ATOM | 373 | HG2  | LYS | 23 | 11.416 | 13.903 | -9.480  |
| ATOM | 374 | HG3  | LYS | 23 | 11.145 | 13.659 | -9.052  |
| ATOM | 375 | CD   | LYS | 23 | 11.203 | 14.936 | -8.973  |
| ATOM | 376 | HD2  | LYS | 23 | 11.205 | 15.016 | -8.667  |
| ATOM | 377 | HD3  | LYS | 23 | 11.405 | 15.164 | -9.039  |
| ATOM | 378 | CE   | LYS | 23 | 10.711 | 15.523 | -9.174  |
| ATOM | 379 | HE2  | LYS | 23 | 10.628 | 15.549 | -9.341  |
| ATOM | 380 | HE3  | LYS | 23 | 10.609 | 15.413 | -9.157  |
| ATOM | 381 | NZ   | LYS | 23 | 10.483 | 16.196 | -9.170  |
| ATOM | 382 | HZ1  | LYS | 23 | 10.426 | 16.365 | -9.180  |
| ATOM | 383 | HZ2  | LYS | 23 | 10.409 | 16.362 | -9.166  |
| ATOM | 384 | HZ3  | LYS | 23 | 10.440 | 16.362 | -9.164  |
| ATOM | 385 | C    | LYS | 23 | 13.367 | 11.767 | -9.456  |
| ATOM | 386 | O    | LYS | 23 | 13.704 | 11.971 | -10.386 |
| ATOM | 387 | N    | LEU | 24 | 14.053 | 11.250 | -8.685  |
| ATOM | 388 | H    | LEU | 24 | 13.718 | 11.140 | -7.933  |

|       |     |      |     |    |         |        |         |
|-------|-----|------|-----|----|---------|--------|---------|
| ATOM  | 389 | CA   | LEU | 24 | 15.248  | 10.851 | -8.847  |
| ATOM  | 390 | HA   | LEU | 24 | 15.606  | 11.385 | -9.420  |
| ATOM  | 391 | CB   | LEU | 24 | 15.970  | 10.864 | -7.760  |
| ATOM  | 392 | HB2  | LEU | 24 | 15.828  | 11.300 | -7.381  |
| ATOM  | 393 | HB3  | LEU | 24 | 15.934  | 10.398 | -7.396  |
| ATOM  | 394 | CG   | LEU | 24 | 16.929  | 10.917 | -7.622  |
| ATOM  | 395 | HG   | LEU | 24 | 16.891  | 10.532 | -7.790  |
| ATOM  | 396 | CD1  | LEU | 24 | 17.492  | 11.394 | -7.778  |
| ATOM  | 397 | HD11 | LEU | 24 | 17.645  | 11.527 | -7.815  |
| ATOM  | 398 | HD12 | LEU | 24 | 17.635  | 11.517 | -7.820  |
| ATOM  | 399 | HD13 | LEU | 24 | 17.613  | 11.480 | -7.815  |
| ATOM  | 400 | CD2  | LEU | 24 | 17.420  | 11.011 | -7.043  |
| ATOM  | 401 | HD21 | LEU | 24 | 17.516  | 11.036 | -6.868  |
| ATOM  | 402 | HD22 | LEU | 24 | 17.569  | 10.996 | -6.930  |
| ATOM  | 403 | HD23 | LEU | 24 | 17.537  | 11.064 | -6.911  |
| ATOM  | 404 | C    | LEU | 24 | 15.311  | 9.747  | -9.342  |
| ATOM  | 405 | O    | LEU | 24 | 15.986  | 9.538  | -9.913  |
| ATOM  | 406 | N    | LEU | 25 | 14.597  | 9.054  | -9.153  |
| ATOM  | 407 | H    | LEU | 25 | 14.081  | 9.271  | -8.670  |
| ATOM  | 408 | CA   | LEU | 25 | 14.529  | 7.990  | -9.578  |
| ATOM  | 409 | HA   | LEU | 25 | 15.240  | 7.732  | -9.693  |
| ATOM  | 410 | CB   | LEU | 25 | 14.099  | 7.331  | -8.818  |
| ATOM  | 411 | HB2  | LEU | 25 | 14.007  | 7.515  | -8.386  |
| ATOM  | 412 | HB3  | LEU | 25 | 13.727  | 7.166  | -8.941  |
| ATOM  | 413 | CG   | LEU | 25 | 14.255  | 6.640  | -8.453  |
| ATOM  | 414 | HG   | LEU | 25 | 14.039  | 6.807  | -8.629  |
| ATOM  | 415 | CD1  | LEU | 25 | 14.524  | 6.000  | -8.172  |
| ATOM  | 416 | HD11 | LEU | 25 | 14.568  | 5.869  | -8.140  |
| ATOM  | 417 | HD12 | LEU | 25 | 14.605  | 5.902  | -8.069  |
| ATOM  | 418 | HD13 | LEU | 25 | 14.592  | 5.978  | -8.106  |
| ATOM  | 419 | CD2  | LEU | 25 | 14.411  | 6.269  | -8.090  |
| ATOM  | 420 | HD21 | LEU | 25 | 14.433  | 6.195  | -7.992  |
| ATOM  | 421 | HD22 | LEU | 25 | 14.483  | 6.190  | -7.998  |
| ATOM  | 422 | HD23 | LEU | 25 | 14.431  | 6.154  | -8.012  |
| ATOM  | 423 | C    | LEU | 25 | 13.970  | 7.870  | -10.604 |
| ATOM  | 424 | O    | LEU | 25 | 13.726  | 7.540  | -10.932 |
| ATOM  | 425 | N    | ASN | 26 | 13.776  | 8.134  | -11.116 |
| ATOM  | 426 | H    | ASN | 26 | 13.992  | 8.397  | -10.802 |
| ATOM  | 427 | CA   | ASN | 26 | 13.269  | 8.051  | -12.091 |
| ATOM  | 428 | HA   | ASN | 26 | 12.970  | 7.804  | -12.274 |
| ATOM  | 429 | CB   | ASN | 26 | 12.961  | 8.504  | -12.433 |
| ATOM  | 430 | HB2  | ASN | 26 | 12.870  | 8.679  | -12.173 |
| ATOM  | 431 | HB3  | ASN | 26 | 13.169  | 8.694  | -12.381 |
| ATOM  | 432 | CG   | ASN | 26 | 12.486  | 8.474  | -13.188 |
| ATOM  | 433 | OD1  | ASN | 26 | 12.272  | 8.311  | -13.488 |
| ATOM  | 434 | ND2  | ASN | 26 | 12.305  | 8.628  | -13.520 |
| ATOM  | 435 | HD21 | ASN | 26 | 11.992  | 8.606  | -14.020 |
| ATOM  | 436 | HD22 | ASN | 26 | 12.478  | 8.767  | -13.282 |
| ATOM  | 437 | C    | ASN | 26 | 13.435  | 7.837  | -12.519 |
| ATOM  | 438 | O    | ASN | 26 | 13.628  | 7.772  | -12.715 |
| ATOM  | 439 | N    | LEU | 27 | 13.363  | 7.724  | -12.667 |
| ATOM  | 440 | H    | LEU | 27 | 13.203  | 7.792  | -12.495 |
| ATOM  | 441 | CA   | LEU | 27 | 13.495  | 7.514  | -13.068 |
| ATOM  | 442 | HA   | LEU | 27 | 13.599  | 7.498  | -13.149 |
| ATOM  | 443 | CB   | LEU | 27 | 13.458  | 7.471  | -12.876 |
| ATOM  | 444 | HB2  | LEU | 27 | 13.355  | 7.586  | -12.652 |
| ATOM  | 445 | HB3  | LEU | 27 | 13.442  | 7.389  | -12.845 |
| ATOM  | 446 | CG   | LEU | 27 | 13.573  | 7.384  | -13.008 |
| ATOM  | 447 | HG   | LEU | 27 | 13.627  | 7.365  | -13.141 |
| ATOM  | 448 | CD1  | LEU | 27 | 13.529  | 7.324  | -13.016 |
| ATOM  | 449 | HD11 | LEU | 27 | 13.527  | 7.359  | -13.000 |
| ATOM  | 450 | HD12 | LEU | 27 | 13.511  | 7.294  | -13.073 |
| ATOM  | 451 | HD13 | LEU | 27 | 13.520  | 7.278  | -12.984 |
| ATOM  | 452 | CD2  | LEU | 27 | 13.658  | 7.379  | -12.943 |
| ATOM  | 453 | HD21 | LEU | 27 | 13.699  | 7.342  | -12.950 |
| ATOM  | 454 | HD22 | LEU | 27 | 13.667  | 7.404  | -12.928 |
| ATOM  | 455 | HD23 | LEU | 27 | 13.677  | 7.388  | -12.904 |
| ATOM  | 456 | C    | LEU | 27 | 13.526  | 7.361  | -13.560 |
| ATOM  | 457 | O    | LEU | 27 | 13.467  | 7.339  | -13.633 |
| TER   |     |      |     |    |         |        |         |
| MOL 2 |     |      |     |    |         |        |         |
| ATOM  | 458 | N    | SER | 28 | -10.758 | 5.239  | -16.379 |
| ATOM  | 459 | H    | SER | 28 | -10.609 | 4.789  | -16.460 |
| ATOM  | 460 | CA   | SER | 28 | -10.359 | 5.816  | -16.183 |
| ATOM  | 461 | HA   | SER | 28 | -10.281 | 5.769  | -15.665 |
| ATOM  | 462 | CB   | SER | 28 | -9.557  | 5.492  | -16.683 |
| ATOM  | 463 | HB2  | SER | 28 | -9.596  | 5.503  | -17.184 |
| ATOM  | 464 | HB3  | SER | 28 | -9.260  | 5.906  | -16.567 |
| ATOM  | 465 | OG   | SER | 28 | -9.135  | 4.655  | -16.651 |
| ATOM  | 466 | HG   | SER | 28 | -9.121  | 4.314  | -16.675 |
| ATOM  | 467 | C    | SER | 28 | -10.816 | 6.807  | -16.152 |
| ATOM  | 468 | O    | SER | 28 | -10.325 | 7.404  | -15.949 |
| ATOM  | 469 | N    | ALA | 29 | -11.755 | 6.994  | -16.342 |
| ATOM  | 470 | H    | ALA | 29 | -12.109 | 6.469  | -16.510 |
| ATOM  | 471 | CA   | ALA | 29 | -12.283 | 7.915  | -16.374 |
| ATOM  | 472 | HA   | ALA | 29 | -11.719 | 8.375  | -16.501 |
| ATOM  | 473 | CB   | ALA | 29 | -12.799 | 7.810  | -17.355 |
| ATOM  | 474 | HB1  | ALA | 29 | -12.913 | 7.767  | -17.589 |
| ATOM  | 475 | HB2  | ALA | 29 | -12.951 | 7.806  | -17.543 |
| ATOM  | 476 | HB3  | ALA | 29 | -12.906 | 7.792  | -17.650 |
| ATOM  | 477 | C    | ALA | 29 | -13.037 | 8.401  | -15.312 |
| ATOM  | 478 | O    | ALA | 29 | -13.268 | 9.402  | -15.222 |
| ATOM  | 479 | N    | SER | 30 | -13.411 | 7.709  | -14.497 |
| ATOM  | 480 | H    | SER | 30 | -13.199 | 6.903  | -14.627 |
| ATOM  | 481 | CA   | SER | 30 | -14.075 | 8.043  | -13.395 |
| ATOM  | 482 | HA   | SER | 30 | -14.071 | 9.011  | -13.330 |
| ATOM  | 483 | CB   | SER | 30 | -15.385 | 7.690  | -13.574 |
| ATOM  | 484 | HB2  | SER | 30 | -15.699 | 7.933  | -13.382 |
| ATOM  | 485 | HB3  | SER | 30 | -15.678 | 7.628  | -13.979 |
| ATOM  | 486 | OG   | SER | 30 | -15.838 | 7.152  | -13.463 |
| ATOM  | 487 | HG   | SER | 30 | -16.429 | 7.009  | -13.624 |
| ATOM  | 488 | C    | SER | 30 | -13.493 | 7.471  | -12.142 |
| ATOM  | 489 | O    | SER | 30 | -12.917 | 6.409  | -12.160 |
| ATOM  | 490 | N    | GLU | 31 | -13.657 | 8.147  | -11.029 |
| ATOM  | 491 | H    | GLU | 31 | -14.124 | 9.011  | -11.076 |

|      |     |      |     |    |         |        |         |
|------|-----|------|-----|----|---------|--------|---------|
| ATOM | 492 | CA   | GLU | 31 | -13.124 | 7.730  | -9.750  |
| ATOM | 493 | HA   | GLU | 31 | -12.067 | 7.619  | -9.857  |
| ATOM | 494 | CB   | GLU | 31 | -13.359 | 8.821  | -8.723  |
| ATOM | 495 | HB2  | GLU | 31 | -12.899 | 8.619  | -7.930  |
| ATOM | 496 | HB3  | GLU | 31 | -13.000 | 9.628  | -9.034  |
| ATOM | 497 | CG   | GLU | 31 | -14.632 | 9.127  | -8.322  |
| ATOM | 498 | HG2  | GLU | 31 | -15.139 | 9.170  | -9.082  |
| ATOM | 499 | HG3  | GLU | 31 | -14.932 | 8.408  | -7.854  |
| ATOM | 500 | CD   | GLU | 31 | -14.819 | 10.350 | -7.525  |
| ATOM | 501 | OE1  | GLU | 31 | -14.834 | 10.814 | -7.150  |
| ATOM | 502 | OE2  | GLU | 31 | -14.953 | 10.878 | -7.264  |
| ATOM | 503 | C    | GLU | 31 | -13.635 | 6.382  | -9.277  |
| ATOM | 504 | O    | GLU | 31 | -12.897 | 5.634  | -8.684  |
| ATOM | 505 | N    | GLU | 32 | -14.858 | 6.023  | -9.595  |
| ATOM | 506 | H    | GLU | 32 | -15.412 | 6.666  | -10.093 |
| ATOM | 507 | CA   | GLU | 32 | -15.429 | 4.734  | -9.266  |
| ATOM | 508 | HA   | GLU | 32 | -15.194 | 4.510  | -8.252  |
| ATOM | 509 | CB   | GLU | 32 | -16.929 | 4.796  | -9.383  |
| ATOM | 510 | HB2  | GLU | 32 | -17.218 | 4.950  | -9.709  |
| ATOM | 511 | HB3  | GLU | 32 | -17.265 | 4.467  | -9.389  |
| ATOM | 512 | CG   | GLU | 32 | -17.602 | 5.078  | -9.031  |
| ATOM | 513 | HG2  | GLU | 32 | -17.364 | 4.859  | -8.763  |
| ATOM | 514 | HG3  | GLU | 32 | -17.356 | 5.389  | -8.966  |
| ATOM | 515 | CD   | GLU | 32 | -18.932 | 5.229  | -9.128  |
| ATOM | 516 | OE1  | GLU | 32 | -19.453 | 5.310  | -9.177  |
| ATOM | 517 | OE2  | GLU | 32 | -19.471 | 5.270  | -9.154  |
| ATOM | 518 | C    | GLU | 32 | -14.853 | 3.600  | -10.102 |
| ATOM | 519 | O    | GLU | 32 | -14.736 | 2.507  | -9.639  |
| ATOM | 520 | N    | GLN | 33 | -14.434 | 3.856  | -11.312 |
| ATOM | 521 | H    | GLN | 33 | -14.530 | 4.773  | -11.625 |
| ATOM | 522 | CA   | GLN | 33 | -13.723 | 2.905  | -12.151 |
| ATOM | 523 | HA   | GLN | 33 | -14.175 | 1.944  | -12.051 |
| ATOM | 524 | CB   | GLN | 33 | -13.829 | 3.321  | -13.594 |
| ATOM | 525 | HB2  | GLN | 33 | -13.771 | 4.125  | -13.741 |
| ATOM | 526 | HB3  | GLN | 33 | -13.240 | 3.013  | -14.066 |
| ATOM | 527 | CG   | GLN | 33 | -14.792 | 3.053  | -14.229 |
| ATOM | 528 | HG2  | GLN | 33 | -14.891 | 2.375  | -14.217 |
| ATOM | 529 | HG3  | GLN | 33 | -15.286 | 3.309  | -13.833 |
| ATOM | 530 | CD   | GLN | 33 | -14.971 | 3.349  | -15.424 |
| ATOM | 531 | OE1  | GLN | 33 | -14.676 | 3.762  | -15.881 |
| ATOM | 532 | NE2  | GLN | 33 | -15.459 | 3.156  | -15.975 |
| ATOM | 533 | HE21 | GLN | 33 | -15.579 | 3.350  | -16.749 |
| ATOM | 534 | HE22 | GLN | 33 | -15.707 | 2.819  | -15.616 |
| ATOM | 535 | C    | GLN | 33 | -12.277 | 2.755  | -11.724 |
| ATOM | 536 | O    | GLN | 33 | -11.766 | 1.664  | -11.694 |
| ATOM | 537 | N    | VAL | 34 | -11.636 | 3.823  | -11.310 |
| ATOM | 538 | H    | VAL | 34 | -12.101 | 4.688  | -11.386 |
| ATOM | 539 | CA   | VAL | 34 | -10.294 | 3.799  | -10.746 |
| ATOM | 540 | HA   | VAL | 34 | -9.664  | 3.224  | -11.402 |
| ATOM | 541 | CB   | VAL | 34 | -9.712  | 5.203  | -10.667 |
| ATOM | 542 | HB   | VAL | 34 | -10.390 | 5.843  | -10.199 |
| ATOM | 543 | CG1  | VAL | 34 | -8.438  | 5.289  | -9.931  |
| ATOM | 544 | HG11 | VAL | 34 | -8.134  | 5.390  | -9.724  |
| ATOM | 545 | HG12 | VAL | 34 | -8.147  | 5.267  | -9.714  |
| ATOM | 546 | HG13 | VAL | 34 | -8.105  | 5.305  | -9.814  |
| ATOM | 547 | CG2  | VAL | 34 | -9.444  | 5.731  | -12.008 |
| ATOM | 548 | HG21 | VAL | 34 | -9.349  | 5.864  | -12.324 |
| ATOM | 549 | HG22 | VAL | 34 | -9.387  | 5.841  | -12.358 |
| ATOM | 550 | HG23 | VAL | 34 | -9.399  | 5.886  | -12.326 |
| ATOM | 551 | C    | VAL | 34 | -10.264 | 3.091  | -9.408  |
| ATOM | 552 | O    | VAL | 34 | -9.316  | 2.390  | -9.132  |
| ATOM | 553 | N    | ALA | 35 | -11.299 | 3.177  | -8.594  |
| ATOM | 554 | H    | ALA | 35 | -12.024 | 3.811  | -8.817  |
| ATOM | 555 | CA   | ALA | 35 | -11.407 | 2.410  | -7.367  |
| ATOM | 556 | HA   | ALA | 35 | -10.537 | 2.598  | -6.773  |
| ATOM | 557 | CB   | ALA | 35 | -12.598 | 2.906  | -6.588  |
| ATOM | 558 | HB1  | ALA | 35 | -12.933 | 3.006  | -6.437  |
| ATOM | 559 | HB2  | ALA | 35 | -12.860 | 2.983  | -6.352  |
| ATOM | 560 | HB3  | ALA | 35 | -12.857 | 3.086  | -6.398  |
| ATOM | 561 | C    | ALA | 35 | -11.463 | 0.903  | -7.609  |
| ATOM | 562 | O    | ALA | 35 | -10.848 | 0.156  | -6.895  |
| ATOM | 563 | N    | GLN | 36 | -12.117 | 0.453  | -8.653  |
| ATOM | 564 | H    | GLN | 36 | -12.604 | 1.106  | -9.197  |
| ATOM | 565 | CA   | GLN | 36 | -12.142 | -0.944 | -9.053  |
| ATOM | 566 | HA   | GLN | 36 | -12.336 | -1.536 | -8.186  |
| ATOM | 567 | CB   | GLN | 36 | -13.271 | -1.167 | -10.031 |
| ATOM | 568 | HB2  | GLN | 36 | -13.628 | -0.638 | -10.256 |
| ATOM | 569 | HB3  | GLN | 36 | -13.143 | -1.434 | -10.635 |
| ATOM | 570 | CG   | GLN | 36 | -14.111 | -1.746 | -9.900  |
| ATOM | 571 | HG2  | GLN | 36 | -14.056 | -2.145 | -9.798  |
| ATOM | 572 | HG3  | GLN | 36 | -14.120 | -1.583 | -9.557  |
| ATOM | 573 | CD   | GLN | 36 | -15.032 | -2.015 | -10.378 |
| ATOM | 574 | OE1  | GLN | 36 | -15.451 | -2.074 | -10.623 |
| ATOM | 575 | NE2  | GLN | 36 | -15.379 | -2.184 | -10.528 |
| ATOM | 576 | HE21 | GLN | 36 | -15.047 | -2.140 | -10.330 |
| ATOM | 577 | HE22 | GLN | 36 | -15.975 | -2.354 | -10.834 |
| ATOM | 578 | C    | GLN | 36 | -10.810 | -1.425 | -9.609  |
| ATOM | 579 | O    | GLN | 36 | -10.423 | -2.536 | -9.366  |
| ATOM | 580 | N    | ASP | 37 | -10.069 | -0.589 | -10.293 |
| ATOM | 581 | H    | ASP | 37 | -10.457 | 0.284  | -10.515 |
| ATOM | 582 | CA   | ASP | 37 | -8.709  | -0.880 | -10.719 |
| ATOM | 583 | HA   | ASP | 37 | -8.674  | -1.858 | -11.156 |
| ATOM | 584 | CB   | ASP | 37 | -8.262  | 0.119  | -11.765 |
| ATOM | 585 | HB2  | ASP | 37 | -8.424  | 1.089  | -11.411 |
| ATOM | 586 | HB3  | ASP | 37 | -7.228  | 0.014  | -11.913 |
| ATOM | 587 | CG   | ASP | 37 | -8.912  | -0.017 | -13.089 |
| ATOM | 588 | OD1  | ASP | 37 | -9.141  | -0.021 | -13.638 |
| ATOM | 589 | OD2  | ASP | 37 | -9.169  | -0.109 | -13.610 |
| ATOM | 590 | C    | ASP | 37 | -7.724  | -0.889 | -9.555  |
| ATOM | 591 | O    | ASP | 37 | -6.825  | -1.702 | -9.524  |
| ATOM | 592 | N    | THR | 38 | -7.919  | -0.037 | -8.562  |
| ATOM | 593 | H    | THR | 38 | -8.675  | 0.596  | -8.657  |
| ATOM | 594 | CA   | THR | 38 | -7.073  | 0.052  | -7.369  |
| ATOM | 595 | HA   | THR | 38 | -6.058  | 0.205  | -7.687  |
| ATOM | 596 | CB   | THR | 38 | -7.471  | 1.232  | -6.492  |

|      |     |      |     |    |         |        |         |
|------|-----|------|-----|----|---------|--------|---------|
| ATOM | 597 | HB   | THR | 38 | -8.459  | 1.078  | -6.116  |
| ATOM | 598 | CG2  | THR | 38 | -6.540  | 1.459  | -5.328  |
| ATOM | 599 | HG21 | THR | 38 | -6.313  | 1.527  | -5.045  |
| ATOM | 600 | HG22 | THR | 38 | -6.325  | 1.513  | -5.033  |
| ATOM | 601 | HG23 | THR | 38 | -6.310  | 1.506  | -5.046  |
| ATOM | 602 | OG1  | THR | 38 | -7.458  | 2.418  | -7.223  |
| ATOM | 603 | HG1  | THR | 38 | -8.138  | 2.380  | -7.857  |
| ATOM | 604 | C    | THR | 38 | -7.097  | -1.230 | -6.553  |
| ATOM | 605 | O    | THR | 38 | -6.085  | -1.608 | -5.996  |
| ATOM | 606 | N    | GLU | 39 | -8.209  | -1.947 | -6.519  |
| ATOM | 607 | H    | GLU | 39 | -9.010  | -1.591 | -6.982  |
| ATOM | 608 | CA   | GLU | 39 | -8.293  | -3.254 | -5.878  |
| ATOM | 609 | HA   | GLU | 39 | -7.931  | -3.166 | -4.870  |
| ATOM | 610 | CB   | GLU | 39 | -9.743  | -3.701 | -5.829  |
| ATOM | 611 | HB2  | GLU | 39 | -10.280 | -3.089 | -5.607  |
| ATOM | 612 | HB3  | GLU | 39 | -10.029 | -3.951 | -6.575  |
| ATOM | 613 | CG   | GLU | 39 | -10.105 | -4.622 | -5.062  |
| ATOM | 614 | HG2  | GLU | 39 | -9.446  | -5.021 | -4.955  |
| ATOM | 615 | HG3  | GLU | 39 | -10.226 | -4.280 | -4.411  |
| ATOM | 616 | CD   | GLU | 39 | -11.198 | -5.472 | -5.308  |
| ATOM | 617 | OE1  | GLU | 39 | -11.644 | -5.820 | -5.363  |
| ATOM | 618 | OE2  | GLU | 39 | -11.613 | -5.816 | -5.447  |
| ATOM | 619 | C    | GLU | 39 | -7.422  | -4.301 | -6.573  |
| ATOM | 620 | O    | GLU | 39 | -6.768  | -5.089 | -5.918  |
| ATOM | 621 | N    | GLU | 40 | -7.357  | -4.278 | -7.895  |
| ATOM | 622 | H    | GLU | 40 | -7.862  | -3.571 | -8.371  |
| ATOM | 623 | CA   | GLU | 40 | -6.525  | -5.177 | -8.684  |
| ATOM | 624 | HA   | GLU | 40 | -6.649  | -6.174 | -8.294  |
| ATOM | 625 | CB   | GLU | 40 | -6.999  | -5.153 | -10.135 |
| ATOM | 626 | HB2  | GLU | 40 | -7.985  | -5.059 | -10.172 |
| ATOM | 627 | HB3  | GLU | 40 | -6.632  | -4.365 | -10.612 |
| ATOM | 628 | CG   | GLU | 40 | -6.670  | -6.285 | -10.921 |
| ATOM | 629 | HG2  | GLU | 40 | -6.843  | -6.076 | -11.762 |
| ATOM | 630 | HG3  | GLU | 40 | -5.798  | -6.439 | -10.886 |
| ATOM | 631 | CD   | GLU | 40 | -7.300  | -7.473 | -10.652 |
| ATOM | 632 | OE1  | GLU | 40 | -7.722  | -7.862 | -10.542 |
| ATOM | 633 | OE2  | GLU | 40 | -7.388  | -8.018 | -10.485 |
| ATOM | 634 | C    | GLU | 40 | -5.041  | -4.839 | -8.565  |
| ATOM | 635 | O    | GLU | 40 | -4.224  | -5.733 | -8.424  |
| ATOM | 636 | N    | VAL | 41 | -4.692  | -3.560 | -8.535  |
| ATOM | 637 | H    | VAL | 41 | -5.409  | -2.889 | -8.686  |
| ATOM | 638 | CA   | VAL | 41 | -3.337  | -3.086 | -8.246  |
| ATOM | 639 | HA   | VAL | 41 | -2.655  | -3.560 | -8.932  |
| ATOM | 640 | CB   | VAL | 41 | -3.222  | -1.569 | -8.434  |
| ATOM | 641 | HB   | VAL | 41 | -3.978  | -1.090 | -7.868  |
| ATOM | 642 | CG1  | VAL | 41 | -1.898  | -1.012 | -7.995  |
| ATOM | 643 | HG11 | VAL | 41 | -1.540  | -0.918 | -7.948  |
| ATOM | 644 | HG12 | VAL | 41 | -1.607  | -0.789 | -7.904  |
| ATOM | 645 | HG13 | VAL | 41 | -1.586  | -0.899 | -7.805  |
| ATOM | 646 | CG2  | VAL | 41 | -3.403  | -1.174 | -9.869  |
| ATOM | 647 | HG21 | VAL | 41 | -3.488  | -1.100 | -10.208 |
| ATOM | 648 | HG22 | VAL | 41 | -3.453  | -1.032 | -10.211 |
| ATOM | 649 | HG23 | VAL | 41 | -3.415  | -1.088 | -10.234 |
| ATOM | 650 | C    | VAL | 41 | -2.907  | -3.496 | -6.845  |
| ATOM | 651 | O    | VAL | 41 | -1.818  | -4.016 | -6.688  |
| ATOM | 652 | N    | PHE | 42 | -3.750  | -3.323 | -5.832  |
| ATOM | 653 | H    | PHE | 42 | -4.630  | -2.895 | -6.018  |
| ATOM | 654 | CA   | PHE | 42 | -3.405  | -3.628 | -4.448  |
| ATOM | 655 | HA   | PHE | 42 | -2.450  | -3.176 | -4.240  |
| ATOM | 656 | CB   | PHE | 42 | -4.417  | -2.999 | -3.502  |
| ATOM | 657 | HB2  | PHE | 42 | -4.522  | -1.973 | -3.744  |
| ATOM | 658 | HB3  | PHE | 42 | -5.365  | -3.448 | -3.651  |
| ATOM | 659 | CG   | PHE | 42 | -4.054  | -3.092 | -2.057  |
| ATOM | 660 | CD1  | PHE | 42 | -3.612  | -2.819 | -1.400  |
| ATOM | 661 | HD1  | PHE | 42 | -3.533  | -2.547 | -1.917  |
| ATOM | 662 | CE1  | PHE | 42 | -3.266  | -2.911 | -0.073  |
| ATOM | 663 | HE1  | PHE | 42 | -2.926  | -2.707 | 0.421   |
| ATOM | 664 | CZ   | PHE | 42 | -3.365  | -3.272 | 0.608   |
| ATOM | 665 | HZ   | PHE | 42 | -3.103  | -3.348 | 1.622   |
| ATOM | 666 | CE2  | PHE | 42 | -3.804  | -3.540 | -0.040  |
| ATOM | 667 | HE2  | PHE | 42 | -3.875  | -3.820 | 0.476   |
| ATOM | 668 | CD2  | PHE | 42 | -4.146  | -3.451 | -1.369  |
| ATOM | 669 | HD2  | PHE | 42 | -4.475  | -3.664 | -1.859  |
| ATOM | 670 | C    | PHE | 42 | -3.238  | -5.123 | -4.197  |
| ATOM | 671 | O    | PHE | 42 | -2.241  | -5.521 | -3.618  |
| ATOM | 672 | N    | ARG | 43 | -4.141  | -5.972 | -4.689  |
| ATOM | 673 | H    | ARG | 43 | -4.934  | -5.595 | -5.161  |
| ATOM | 674 | CA   | ARG | 43 | -4.000  | -7.433 | -4.591  |
| ATOM | 675 | HA   | ARG | 43 | -3.873  | -7.703 | -3.555  |
| ATOM | 676 | CB   | ARG | 43 | -5.246  | -8.129 | -5.135  |
| ATOM | 677 | HB2  | ARG | 43 | -5.521  | -7.704 | -6.047  |
| ATOM | 678 | HB3  | ARG | 43 | -5.022  | -9.134 | -5.308  |
| ATOM | 679 | CG   | ARG | 43 | -6.404  | -8.082 | -4.207  |
| ATOM | 680 | HG2  | ARG | 43 | -6.077  | -8.442 | -3.288  |
| ATOM | 681 | HG3  | ARG | 43 | -6.695  | -7.092 | -4.067  |
| ATOM | 682 | CD   | ARG | 43 | -7.598  | -8.913 | -4.644  |
| ATOM | 683 | HD2  | ARG | 43 | -7.278  | -9.842 | -4.993  |
| ATOM | 684 | HD3  | ARG | 43 | -8.189  | -9.098 | -3.807  |
| ATOM | 685 | NE   | ARG | 43 | -8.435  | -8.275 | -5.609  |
| ATOM | 686 | HE   | ARG | 43 | -9.163  | -7.743 | -5.271  |
| ATOM | 687 | CZ   | ARG | 43 | -8.358  | -8.299 | -6.876  |
| ATOM | 688 | NH1  | ARG | 43 | -7.517  | -8.985 | -7.496  |
| ATOM | 689 | HH11 | ARG | 43 | -6.981  | -9.643 | -7.034  |
| ATOM | 690 | HH12 | ARG | 43 | -7.455  | -8.907 | -8.452  |
| ATOM | 691 | NH2  | ARG | 43 | -9.158  | -7.620 | -7.560  |
| ATOM | 692 | HH21 | ARG | 43 | -9.865  | -7.136 | -7.119  |
| ATOM | 693 | HH22 | ARG | 43 | -9.109  | -7.652 | -8.522  |
| ATOM | 694 | C    | ARG | 43 | -2.744  | -7.937 | -5.293  |
| ATOM | 695 | O    | ARG | 43 | -2.041  | -8.770 | -4.750  |
| ATOM | 696 | N    | SER | 44 | -2.417  | -7.379 | -6.447  |
| ATOM | 697 | H    | SER | 44 | -3.046  | -6.714 | -6.833  |
| ATOM | 698 | CA   | SER | 44 | -1.190  | -7.693 | -7.177  |
| ATOM | 699 | HA   | SER | 44 | -1.106  | -8.763 | -7.266  |
| ATOM | 700 | CB   | SER | 44 | -1.241  | -7.120 | -8.582  |
| ATOM | 701 | HB2  | SER | 44 | -1.335  | -6.142 | -8.581  |

|      |     |      |     |    |        |         |         |
|------|-----|------|-----|----|--------|---------|---------|
| ATOM | 702 | HB3  | SER | 44 | -0.417 | -7.330  | -9.073  |
| ATOM | 703 | OG   | SER | 44 | -2.219 | -7.586  | -9.268  |
| ATOM | 704 | HG   | SER | 44 | -2.892 | -7.057  | -9.122  |
| ATOM | 705 | C    | SER | 44 | 0.061  | -7.212  | -6.451  |
| ATOM | 706 | O    | SER | 44 | 1.025  | -7.945  | -6.368  |
| ATOM | 707 | N    | TYR | 45 | 0.045  | -6.022  | -5.866  |
| ATOM | 708 | H    | TYR | 45 | -0.764 | -5.456  | -5.978  |
| ATOM | 709 | CA   | TYR | 45 | 1.136  | -5.492  | -5.055  |
| ATOM | 710 | HA   | TYR | 45 | 2.036  | -5.491  | -5.650  |
| ATOM | 711 | CB   | TYR | 45 | 0.822  | -4.049  | -4.666  |
| ATOM | 712 | HB2  | TYR | 45 | 0.733  | -3.471  | -5.550  |
| ATOM | 713 | HB3  | TYR | 45 | -0.120 | -4.020  | -4.184  |
| ATOM | 714 | CG   | TYR | 45 | 1.812  | -3.374  | -3.775  |
| ATOM | 715 | CD1  | TYR | 45 | 2.620  | -3.073  | -3.670  |
| ATOM | 716 | HD1  | TYR | 45 | 2.542  | -3.335  | -4.219  |
| ATOM | 717 | CE1  | TYR | 45 | 3.526  | -2.432  | -2.850  |
| ATOM | 718 | HE1  | TYR | 45 | 4.140  | -2.200  | -2.771  |
| ATOM | 719 | CZ   | TYR | 45 | 3.630  | -2.090  | -2.133  |
| ATOM | 720 | OH   | TYR | 45 | 4.501  | -1.474  | -1.350  |
| ATOM | 721 | HH   | TYR | 45 | 4.991  | -1.356  | -1.320  |
| ATOM | 722 | CE2  | TYR | 45 | 2.820  | -2.386  | -2.236  |
| ATOM | 723 | HE2  | TYR | 45 | 2.902  | -2.114  | -1.684  |
| ATOM | 724 | CD2  | TYR | 45 | 1.912  | -3.027  | -3.052  |
| ATOM | 725 | HD2  | TYR | 45 | 1.297  | -3.253  | -3.124  |
| ATOM | 726 | C    | TYR | 45 | 1.411  | -6.363  | -3.832  |
| ATOM | 727 | O    | TYR | 45 | 2.548  | -6.734  | -3.608  |
| ATOM | 728 | N    | VAL | 46 | 0.386  | -6.759  | -3.085  |
| ATOM | 729 | H    | VAL | 46 | -0.520 | -6.419  | -3.321  |
| ATOM | 730 | CA   | VAL | 46 | 0.518  | -7.643  | -1.922  |
| ATOM | 731 | HA   | VAL | 46 | 1.211  | -7.192  | -1.234  |
| ATOM | 732 | CB   | VAL | 46 | -0.826 | -7.805  | -1.207  |
| ATOM | 733 | HB   | VAL | 46 | -1.542 | -8.091  | -1.895  |
| ATOM | 734 | CG1  | VAL | 46 | -0.813 | -8.815  | -0.144  |
| ATOM | 735 | HG11 | VAL | 46 | -0.833 | -9.059  | 0.129   |
| ATOM | 736 | HG12 | VAL | 46 | -0.818 | -9.084  | 0.099   |
| ATOM | 737 | HG13 | VAL | 46 | -0.803 | -9.054  | 0.112   |
| ATOM | 738 | CG2  | VAL | 46 | -1.298 | -6.555  | -0.578  |
| ATOM | 739 | HG21 | VAL | 46 | -1.417 | -6.244  | -0.431  |
| ATOM | 740 | HG22 | VAL | 46 | -1.428 | -6.248  | -0.429  |
| ATOM | 741 | HG23 | VAL | 46 | -1.420 | -6.250  | -0.418  |
| ATOM | 742 | C    | VAL | 46 | 1.122  | -8.987  | -2.305  |
| ATOM | 743 | O    | VAL | 46 | 2.028  | -9.448  | -1.639  |
| ATOM | 744 | N    | PHE | 47 | 0.686  | -9.587  | -3.399  |
| ATOM | 745 | H    | PHE | 47 | -0.056 | -9.161  | -3.902  |
| ATOM | 746 | CA   | PHE | 47 | 1.223  | -10.846 | -3.891  |
| ATOM | 747 | HA   | PHE | 47 | 1.204  | -11.563 | -3.087  |
| ATOM | 748 | CB   | PHE | 47 | 0.331  | -11.371 | -5.007  |
| ATOM | 749 | HB2  | PHE | 47 | -0.657 | -11.481 | -4.634  |
| ATOM | 750 | HB3  | PHE | 47 | 0.285  | -10.658 | -5.792  |
| ATOM | 751 | CG   | PHE | 47 | 0.764  | -12.673 | -5.576  |
| ATOM | 752 | CD1  | PHE | 47 | 0.489  | -13.754 | -5.074  |
| ATOM | 753 | HD1  | PHE | 47 | -0.040 | -13.662 | -4.297  |
| ATOM | 754 | CE1  | PHE | 47 | 0.902  | -14.949 | -5.588  |
| ATOM | 755 | HE1  | PHE | 47 | 0.690  | -15.770 | -5.204  |
| ATOM | 756 | CZ   | PHE | 47 | 1.587  | -15.073 | -6.607  |
| ATOM | 757 | HZ   | PHE | 47 | 1.899  | -15.986 | -7.001  |
| ATOM | 758 | CE2  | PHE | 47 | 1.861  | -14.001 | -7.116  |
| ATOM | 759 | HE2  | PHE | 47 | 2.381  | -14.094 | -7.901  |
| ATOM | 760 | CD2  | PHE | 47 | 1.450  | -12.803 | -6.603  |
| ATOM | 761 | HD2  | PHE | 47 | 1.662  | -11.984 | -7.000  |
| ATOM | 762 | C    | PHE | 47 | 2.679  | -10.728 | -4.333  |
| ATOM | 763 | O    | PHE | 47 | 3.523  | -11.458 | -3.846  |
| ATOM | 764 | N    | TYR | 48 | 3.004  | -9.794  | -5.213  |
| ATOM | 765 | H    | TYR | 48 | 2.286  | -9.207  | -5.570  |
| ATOM | 766 | CA   | TYR | 48 | 4.346  | -9.668  | -5.766  |
| ATOM | 767 | HA   | TYR | 48 | 4.693  | -10.659 | -6.013  |
| ATOM | 768 | CB   | TYR | 48 | 4.329  | -8.861  | -7.058  |
| ATOM | 769 | HB2  | TYR | 48 | 3.817  | -7.937  | -6.898  |
| ATOM | 770 | HB3  | TYR | 48 | 5.337  | -8.624  | -7.317  |
| ATOM | 771 | CG   | TYR | 48 | 3.728  | -9.576  | -8.226  |
| ATOM | 772 | CD1  | TYR | 48 | 4.300  | -10.730 | -8.684  |
| ATOM | 773 | HD1  | TYR | 48 | 5.161  | -11.104 | -8.216  |
| ATOM | 774 | CE1  | TYR | 48 | 3.744  | -11.406 | -9.749  |
| ATOM | 775 | HE1  | TYR | 48 | 4.179  | -12.290 | -10.084 |
| ATOM | 776 | CZ   | TYR | 48 | 2.618  | -10.924 | -10.374 |
| ATOM | 777 | OH   | TYR | 48 | 2.081  | -11.564 | -11.400 |
| ATOM | 778 | HH   | TYR | 48 | 2.525  | -12.338 | -11.585 |
| ATOM | 779 | CE2  | TYR | 48 | 2.058  | -9.760  | -9.935  |
| ATOM | 780 | HE2  | TYR | 48 | 1.204  | -9.393  | -10.421 |
| ATOM | 781 | CD2  | TYR | 48 | 2.614  | -9.088  | -8.868  |
| ATOM | 782 | HD2  | TYR | 48 | 2.185  | -8.193  | -8.545  |
| ATOM | 783 | C    | TYR | 48 | 5.357  | -9.126  | -4.765  |
| ATOM | 784 | O    | TYR | 48 | 6.473  | -9.602  | -4.746  |
| ATOM | 785 | N    | ARG | 49 | 4.988  | -8.213  | -3.871  |
| ATOM | 786 | H    | ARG | 49 | 4.064  | -7.849  | -3.914  |
| ATOM | 787 | CA   | ARG | 49 | 5.888  | -7.737  | -2.817  |
| ATOM | 788 | HA   | ARG | 49 | 6.826  | -7.491  | -3.287  |
| ATOM | 789 | CB   | ARG | 49 | 5.328  | -6.473  | -2.159  |
| ATOM | 790 | HB2  | ARG | 49 | 5.017  | -5.794  | -2.901  |
| ATOM | 791 | HB3  | ARG | 49 | 4.480  | -6.721  | -1.590  |
| ATOM | 792 | CG   | ARG | 49 | 6.283  | -5.755  | -1.262  |
| ATOM | 793 | HG2  | ARG | 49 | 5.777  | -4.978  | -0.798  |
| ATOM | 794 | HG3  | ARG | 49 | 6.588  | -6.413  | -0.523  |
| ATOM | 795 | CD   | ARG | 49 | 7.486  | -5.171  | -1.934  |
| ATOM | 796 | HD2  | ARG | 49 | 7.736  | -5.745  | -2.719  |
| ATOM | 797 | HD3  | ARG | 49 | 7.282  | -4.245  | -2.283  |
| ATOM | 798 | NE   | ARG | 49 | 8.567  | -5.062  | -1.088  |
| ATOM | 799 | HE   | ARG | 49 | 8.388  | -4.814  | -0.258  |
| ATOM | 800 | CZ   | ARG | 49 | 9.744  | -5.333  | -1.264  |
| ATOM | 801 | NH1  | ARG | 49 | 10.161 | -5.627  | -2.302  |
| ATOM | 802 | HH11 | ARG | 49 | 9.604  | -5.605  | -3.049  |
| ATOM | 803 | HH12 | ARG | 49 | 11.060 | -5.842  | -2.371  |
| ATOM | 804 | NH2  | ARG | 49 | 10.551 | -5.321  | -0.369  |
| ATOM | 805 | HH21 | ARG | 49 | 10.269 | -5.119  | 0.451   |
| ATOM | 806 | HH22 | ARG | 49 | 11.429 | -5.567  | -0.497  |



|      |     |      |     |    |        |         |        |
|------|-----|------|-----|----|--------|---------|--------|
| ATOM | 807 | C    | ARG | 49 | 6.209  | -8.836  | -1.814 |
| ATOM | 808 | O    | ARG | 49 | 7.358  | -8.984  | -1.453 |
| ATOM | 809 | N    | HIP | 50 | 5.249  | -9.677  | -1.456 |
| ATOM | 810 | H    | HIP | 50 | 4.329  | -9.495  | -1.780 |
| ATOM | 811 | CA   | HIP | 50 | 5.491  | -10.839 | -0.602 |
| ATOM | 812 | HA   | HIP | 50 | 6.023  | -10.502 | 0.271  |
| ATOM | 813 | CB   | HIP | 50 | 4.166  | -11.424 | -0.139 |
| ATOM | 814 | HB2  | HIP | 50 | 3.574  | -10.653 | 0.295  |
| ATOM | 815 | HB3  | HIP | 50 | 3.625  | -11.805 | -0.974 |
| ATOM | 816 | CG   | HIP | 50 | 4.318  | -12.498 | 0.871  |
| ATOM | 817 | ND1  | HIP | 50 | 4.261  | -13.619 | 0.881  |
| ATOM | 818 | HD1  | HIP | 50 | 4.133  | -13.868 | 0.208  |
| ATOM | 819 | CE1  | HIP | 50 | 4.471  | -14.320 | 1.928  |
| ATOM | 820 | HE1  | HIP | 50 | 4.509  | -15.242 | 2.192  |
| ATOM | 821 | NE2  | HIP | 50 | 4.659  | -13.676 | 2.579  |
| ATOM | 822 | HE2  | HIP | 50 | 4.858  | -13.979 | 3.386  |
| ATOM | 823 | CD2  | HIP | 50 | 4.569  | -12.531 | 1.931  |
| ATOM | 824 | HD2  | HIP | 50 | 4.695  | -11.802 | 2.195  |
| ATOM | 825 | C    | HIP | 50 | 6.388  | -11.881 | -1.263 |
| ATOM | 826 | O    | HIP | 50 | 7.237  | -12.433 | -0.606 |
| ATOM | 827 | N    | GLN | 51 | 6.271  | -12.101 | -2.559 |
| ATOM | 828 | H    | GLN | 51 | 5.533  | -11.652 | -3.038 |
| ATOM | 829 | CA   | GLN | 51 | 7.165  | -12.973 | -3.309 |
| ATOM | 830 | HA   | GLN | 51 | 7.222  | -13.916 | -2.798 |
| ATOM | 831 | CB   | GLN | 51 | 6.598  | -13.218 | -4.696 |
| ATOM | 832 | HB2  | GLN | 51 | 5.912  | -13.019 | -4.832 |
| ATOM | 833 | HB3  | GLN | 51 | 6.925  | -12.879 | -5.235 |
| ATOM | 834 | CG   | GLN | 51 | 6.514  | -14.201 | -5.202 |
| ATOM | 835 | HG2  | GLN | 51 | 6.904  | -14.223 | -5.159 |
| ATOM | 836 | HG3  | GLN | 51 | 6.340  | -14.524 | -4.994 |
| ATOM | 837 | CD   | GLN | 51 | 6.131  | -14.727 | -6.064 |
| ATOM | 838 | OE1  | GLN | 51 | 6.049  | -14.586 | -6.471 |
| ATOM | 839 | NE2  | GLN | 51 | 5.893  | -15.348 | -6.373 |
| ATOM | 840 | HE21 | GLN | 51 | 5.651  | -15.695 | -6.928 |
| ATOM | 841 | HE22 | GLN | 51 | 5.966  | -15.478 | -6.050 |
| ATOM | 842 | C    | GLN | 51 | 8.584  | -12.426 | -3.382 |
| ATOM | 843 | O    | GLN | 51 | 9.519  | -13.156 | -3.181 |
| ATOM | 844 | N    | GLN | 52 | 8.755  | -11.140 | -3.599 |
| ATOM | 845 | H    | GLN | 52 | 7.954  | -10.595 | -3.781 |
| ATOM | 846 | CA   | GLN | 52 | 10.049 | -10.485 | -3.651 |
| ATOM | 847 | HA   | GLN | 52 | 10.680 | -11.017 | -4.338 |
| ATOM | 848 | CB   | GLN | 52 | 9.869  | -9.074  | -4.168 |
| ATOM | 849 | HB2  | GLN | 52 | 9.215  | -8.683  | -3.872 |
| ATOM | 850 | HB3  | GLN | 52 | 10.472 | -8.551  | -3.979 |
| ATOM | 851 | CG   | GLN | 52 | 9.772  | -8.871  | -5.335 |
| ATOM | 852 | HG2  | GLN | 52 | 10.398 | -9.046  | -5.672 |
| ATOM | 853 | HG3  | GLN | 52 | 9.311  | -9.395  | -5.574 |
| ATOM | 854 | CD   | GLN | 52 | 9.454  | -7.729  | -5.767 |
| ATOM | 855 | OE1  | GLN | 52 | 9.358  | -6.965  | -5.254 |
| ATOM | 856 | NE2  | GLN | 52 | 9.276  | -7.565  | -6.730 |
| ATOM | 857 | HE21 | GLN | 52 | 9.082  | -6.818  | -7.010 |
| ATOM | 858 | HE22 | GLN | 52 | 9.364  | -8.180  | -7.172 |
| ATOM | 859 | C    | GLN | 52 | 10.762 | -10.480 | -2.310 |
| ATOM | 860 | O    | GLN | 52 | 11.952 | -10.644 | -2.262 |
| ATOM | 861 | N    | GLU | 53 | 10.050 | -10.353 | -1.216 |
| ATOM | 862 | H    | GLU | 53 | 9.089  | -10.165 | -1.311 |
| ATOM | 863 | CA   | GLU | 53 | 10.605 | -10.427 | 0.121  |
| ATOM | 864 | HA   | GLU | 53 | 11.508 | -9.863  | 0.142  |
| ATOM | 865 | CB   | GLU | 53 | 9.651  | -9.799  | 1.109  |
| ATOM | 866 | HB2  | GLU | 53 | 9.001  | -9.734  | 0.980  |
| ATOM | 867 | HB3  | GLU | 53 | 9.580  | -10.072 | 1.679  |
| ATOM | 868 | CG   | GLU | 53 | 9.682  | -8.870  | 1.516  |
| ATOM | 869 | HG2  | GLU | 53 | 10.232 | -8.943  | 1.604  |
| ATOM | 870 | HG3  | GLU | 53 | 9.738  | -8.652  | 1.022  |
| ATOM | 871 | CD   | GLU | 53 | 8.918  | -8.130  | 2.470  |
| ATOM | 872 | OE1  | GLU | 53 | 8.681  | -7.792  | 2.857  |
| ATOM | 873 | OE2  | GLU | 53 | 8.553  | -7.861  | 2.858  |
| ATOM | 874 | C    | GLU | 53 | 10.987 | -11.833 | 0.529  |
| ATOM | 875 | O    | GLU | 53 | 11.861 | -12.010 | 1.312  |
| ATOM | 876 | N    | GLN | 54 | 10.392 | -12.840 | -0.030 |
| ATOM | 877 | H    | GLN | 54 | 9.663  | -12.633 | -0.636 |
| ATOM | 878 | CA   | GLN | 54 | 10.781 | -14.217 | 0.141  |
| ATOM | 879 | HA   | GLN | 54 | 11.084 | -14.359 | 1.143  |
| ATOM | 880 | CB   | GLN | 54 | 9.610  | -15.109 | -0.119 |
| ATOM | 881 | HB2  | GLN | 54 | 9.125  | -14.861 | -0.713 |
| ATOM | 882 | HB3  | GLN | 54 | 9.834  | -15.845 | -0.350 |
| ATOM | 883 | CG   | GLN | 54 | 8.790  | -15.379 | 0.738  |
| ATOM | 884 | HG2  | GLN | 54 | 9.231  | -15.598 | 1.286  |
| ATOM | 885 | HG3  | GLN | 54 | 8.528  | -14.726 | 0.971  |
| ATOM | 886 | CD   | GLN | 54 | 7.720  | -16.249 | 0.552  |
| ATOM | 887 | OE1  | GLN | 54 | 7.252  | -16.408 | 0.172  |
| ATOM | 888 | NE2  | GLN | 54 | 7.297  | -16.854 | 0.803  |
| ATOM | 889 | HE21 | GLN | 54 | 6.618  | -17.437 | 0.661  |
| ATOM | 890 | HE22 | GLN | 54 | 7.670  | -16.746 | 1.118  |
| ATOM | 891 | C    | GLN | 54 | 11.956 | -14.602 | -0.717 |
| ATOM | 892 | O    | GLN | 54 | 12.772 | -15.351 | -0.319 |
| ATOM | 893 | N    | GLU | 55 | 12.097 | -14.054 | -1.867 |
| ATOM | 894 | H    | GLU | 55 | 11.385 | -13.479 | -2.165 |
| ATOM | 895 | CA   | GLU | 55 | 13.231 | -14.251 | -2.725 |
| ATOM | 896 | HA   | GLU | 55 | 13.417 | -15.275 | -2.810 |
| ATOM | 897 | CB   | GLU | 55 | 12.933 | -13.740 | -4.073 |
| ATOM | 898 | HB2  | GLU | 55 | 12.333 | -13.581 | -4.191 |
| ATOM | 899 | HB3  | GLU | 55 | 13.205 | -13.193 | -4.285 |
| ATOM | 900 | CG   | GLU | 55 | 13.076 | -14.192 | -4.995 |
| ATOM | 901 | HG2  | GLU | 55 | 13.588 | -14.324 | -4.873 |
| ATOM | 902 | HG3  | GLU | 55 | 12.835 | -14.657 | -4.837 |
| ATOM | 903 | CD   | GLU | 55 | 12.853 | -13.848 | -6.294 |
| ATOM | 904 | OE1  | GLU | 55 | 12.818 | -13.616 | -6.795 |
| ATOM | 905 | OE2  | GLU | 55 | 12.714 | -13.814 | -6.832 |
| ATOM | 906 | C    | GLU | 55 | 14.473 | -13.644 | -2.187 |
| ATOM | 907 | O    | GLU | 55 | 15.532 | -14.119 | -2.430 |
| ATOM | 908 | N    | ALA | 56 | 14.355 | -12.645 | -1.397 |
| ATOM | 909 | H    | ALA | 56 | 13.469 | -12.286 | -1.259 |
| ATOM | 910 | CA   | ALA | 56 | 15.432 | -12.028 | -0.727 |
| ATOM | 911 | HA   | ALA | 56 | 16.179 | -11.833 | -1.404 |

|      |      |      |     |    |        |         |        |
|------|------|------|-----|----|--------|---------|--------|
| ATOM | 912  | CB   | ALA | 56 | 14.969 | -10.770 | -0.200 |
| ATOM | 913  | HB1  | ALA | 56 | 14.844 | -10.451 | -0.113 |
| ATOM | 914  | HB2  | ALA | 56 | 14.832 | -10.474 | -0.033 |
| ATOM | 915  | HB3  | ALA | 56 | 14.914 | -10.464 | -0.072 |
| ATOM | 916  | C    | ALA | 56 | 16.044 | -12.841 | 0.312  |
| ATOM | 917  | O    | ALA | 56 | 17.112 | -12.601 | 0.700  |
| ATOM | 918  | N    | GLU | 57 | 15.403 | -13.824 | 0.739  |
| ATOM | 919  | H    | GLU | 57 | 14.524 | -13.949 | 0.405  |
| ATOM | 920  | CA   | GLU | 57 | 15.909 | -14.757 | 1.628  |
| ATOM | 921  | HA   | GLU | 57 | 16.673 | -14.351 | 2.157  |
| ATOM | 922  | CB   | GLU | 57 | 14.895 | -15.102 | 2.532  |
| ATOM | 923  | HB2  | GLU | 57 | 14.429 | -15.145 | 2.384  |
| ATOM | 924  | HB3  | GLU | 57 | 14.910 | -15.538 | 2.774  |
| ATOM | 925  | CG   | GLU | 57 | 14.482 | -14.808 | 3.333  |
| ATOM | 926  | HG2  | GLU | 57 | 14.548 | -14.620 | 3.333  |
| ATOM | 927  | HG3  | GLU | 57 | 14.370 | -14.769 | 3.258  |
| ATOM | 928  | CD   | GLU | 57 | 14.114 | -14.823 | 4.243  |
| ATOM | 929  | OE1  | GLU | 57 | 13.943 | -14.871 | 4.599  |
| ATOM | 930  | OE2  | GLU | 57 | 13.992 | -14.779 | 4.619  |
| ATOM | 931  | C    | GLU | 57 | 16.490 | -15.906 | 1.010  |
| ATOM | 932  | O    | GLU | 57 | 16.939 | -16.736 | 1.608  |
| ATOM | 933  | N    | GLY | 58 | 16.503 | -15.961 | -0.186 |
| ATOM | 934  | H    | GLY | 58 | 16.118 | -15.258 | -0.626 |
| ATOM | 935  | CA   | GLY | 58 | 17.077 | -16.954 | -0.899 |
| ATOM | 936  | HA2  | GLY | 58 | 17.420 | -16.632 | -1.571 |
| ATOM | 937  | HA3  | GLY | 58 | 17.722 | -17.319 | -0.463 |
| ATOM | 938  | C    | GLY | 58 | 16.395 | -17.943 | -1.369 |
| ATOM | 939  | O    | GLY | 58 | 16.892 | -18.659 | -1.773 |
| ATOM | 940  | N    | VAL | 59 | 15.264 | -18.004 | -1.315 |
| ATOM | 941  | H    | VAL | 59 | 14.919 | -17.379 | -0.988 |
| ATOM | 942  | CA   | VAL | 59 | 14.483 | -18.911 | -1.726 |
| ATOM | 943  | HA   | VAL | 59 | 14.991 | -19.528 | -1.778 |
| ATOM | 944  | CB   | VAL | 59 | 13.630 | -19.186 | -1.034 |
| ATOM | 945  | HB   | VAL | 59 | 13.239 | -19.116 | -1.356 |
| ATOM | 946  | CG1  | VAL | 59 | 13.498 | -19.885 | -0.709 |
| ATOM | 947  | HG11 | VAL | 59 | 13.457 | -20.046 | -0.639 |
| ATOM | 948  | HG12 | VAL | 59 | 13.485 | -20.046 | -0.659 |
| ATOM | 949  | HG13 | VAL | 59 | 13.445 | -20.077 | -0.591 |
| ATOM | 950  | CG2  | VAL | 59 | 13.409 | -18.898 | -0.205 |
| ATOM | 951  | HG21 | VAL | 59 | 13.445 | -18.815 | 0.018  |
| ATOM | 952  | HG22 | VAL | 59 | 13.317 | -18.785 | -0.035 |
| ATOM | 953  | HG23 | VAL | 59 | 13.291 | -18.888 | 0.011  |
| ATOM | 954  | C    | VAL | 59 | 13.863 | -18.800 | -2.790 |
| ATOM | 955  | O    | VAL | 59 | 13.520 | -17.996 | -3.036 |
| ATOM | 956  | N    | ALA | 60 | 13.707 | -19.609 | -3.422 |
| ATOM | 957  | H    | ALA | 60 | 14.011 | -20.240 | -3.177 |
| ATOM | 958  | CA   | ALA | 60 | 13.085 | -19.646 | -4.448 |
| ATOM | 959  | HA   | ALA | 60 | 13.180 | -18.861 | -4.731 |
| ATOM | 960  | CB   | ALA | 60 | 13.681 | -20.360 | -5.141 |
| ATOM | 961  | HB1  | ALA | 60 | 13.859 | -20.493 | -5.290 |
| ATOM | 962  | HB2  | ALA | 60 | 13.811 | -20.577 | -5.304 |
| ATOM | 963  | HB3  | ALA | 60 | 13.805 | -20.521 | -5.340 |
| ATOM | 964  | C    | ALA | 60 | 11.752 | -19.997 | -4.467 |
| ATOM | 965  | O    | ALA | 60 | 11.387 | -20.731 | -4.061 |
| ATOM | 966  | N    | ALA | 61 | 11.028 | -19.476 | -4.949 |
| ATOM | 967  | H    | ALA | 61 | 11.403 | -18.901 | -5.263 |
| ATOM | 968  | CA   | ALA | 61 | 9.725  | -19.648 | -5.066 |
| ATOM | 969  | HA   | ALA | 61 | 9.609  | -19.193 | -5.303 |
| ATOM | 970  | CB   | ALA | 61 | 9.454  | -20.207 | -5.580 |
| ATOM | 971  | HB1  | ALA | 61 | 9.449  | -20.383 | -5.721 |
| ATOM | 972  | HB2  | ALA | 61 | 9.390  | -20.286 | -5.730 |
| ATOM | 973  | HB3  | ALA | 61 | 9.317  | -20.349 | -5.665 |
| ATOM | 974  | C    | ALA | 61 | 8.794  | -19.783 | -4.432 |
| ATOM | 975  | O    | ALA | 61 | 8.150  | -20.243 | -4.505 |
| ATOM | 976  | N    | PRO | 62 | 8.710  | -19.400 | -3.795 |
| ATOM | 977  | CD   | PRO | 62 | 9.393  | -18.833 | -3.660 |
| ATOM | 978  | HD2  | PRO | 62 | 9.203  | -18.413 | -4.004 |
| ATOM | 979  | HD3  | PRO | 62 | 10.362 | -19.034 | -3.722 |
| ATOM | 980  | CG   | PRO | 62 | 8.973  | -18.560 | -2.899 |
| ATOM | 981  | HG2  | PRO | 62 | 8.407  | -18.142 | -2.899 |
| ATOM | 982  | HG3  | PRO | 62 | 9.682  | -18.448 | -2.656 |
| ATOM | 983  | CB   | PRO | 62 | 8.307  | -19.097 | -2.520 |
| ATOM | 984  | HB2  | PRO | 62 | 8.867  | -19.385 | -2.287 |
| ATOM | 985  | HB3  | PRO | 62 | 7.594  | -18.887 | -2.121 |
| ATOM | 986  | CA   | PRO | 62 | 7.924  | -19.521 | -3.112 |
| ATOM | 987  | HA   | PRO | 62 | 8.133  | -20.082 | -3.025 |
| ATOM | 988  | C    | PRO | 62 | 6.532  | -19.297 | -3.086 |
| ATOM | 989  | O    | PRO | 62 | 6.147  | -18.633 | -3.254 |
| ATOM | 990  | N    | ALA | 63 | 5.771  | -19.842 | -2.843 |
| ATOM | 991  | H    | ALA | 63 | 6.144  | -20.368 | -2.712 |
| ATOM | 992  | CA   | ALA | 63 | 4.429  | -19.726 | -2.701 |
| ATOM | 993  | HA   | ALA | 63 | 4.192  | -18.902 | -2.957 |
| ATOM | 994  | CB   | ALA | 63 | 3.935  | -20.543 | -3.513 |
| ATOM | 995  | HB1  | ALA | 63 | 3.795  | -20.749 | -3.689 |
| ATOM | 996  | HB2  | ALA | 63 | 3.809  | -20.715 | -3.728 |
| ATOM | 997  | HB3  | ALA | 63 | 3.836  | -20.753 | -3.715 |
| ATOM | 998  | C    | ALA | 63 | 3.838  | -19.883 | -1.426 |
| ATOM | 999  | O    | ALA | 63 | 4.260  | -20.440 | -0.815 |
| ATOM | 1000 | N    | ASP | 64 | 2.852  | -19.407 | -1.021 |
| ATOM | 1001 | H    | ASP | 64 | 2.548  | -18.966 | -1.565 |
| ATOM | 1002 | CA   | ASP | 64 | 2.160  | -19.531 | 0.165  |
| ATOM | 1003 | HA   | ASP | 64 | 2.777  | -20.013 | 0.784  |
| ATOM | 1004 | CB   | ASP | 64 | 1.889  | -18.250 | 0.729  |
| ATOM | 1005 | HB2  | ASP | 64 | 2.734  | -17.771 | 0.756  |
| ATOM | 1006 | HB3  | ASP | 64 | 1.274  | -17.759 | 0.174  |
| ATOM | 1007 | CG   | ASP | 64 | 1.334  | -18.270 | 2.007  |
| ATOM | 1008 | OD1  | ASP | 64 | 1.045  | -18.267 | 2.485  |
| ATOM | 1009 | OD2  | ASP | 64 | 1.196  | -18.302 | 2.542  |
| ATOM | 1010 | C    | ASP | 64 | 0.929  | -20.254 | 0.019  |
| ATOM | 1011 | O    | ASP | 64 | 0.237  | -19.989 | -0.809 |
| ATOM | 1012 | N    | PRO | 65 | 0.613  | -21.146 | 0.797  |
| ATOM | 1013 | CD   | PRO | 65 | 1.384  | -21.612 | 1.753  |
| ATOM | 1014 | HD2  | PRO | 65 | 1.423  | -20.986 | 2.478  |
| ATOM | 1015 | HD3  | PRO | 65 | 2.308  | -21.832 | 1.439  |
| ATOM | 1016 | CG   | PRO | 65 | 0.773  | -22.736 | 2.168  |

|      |      |      |     |    |         |         |        |
|------|------|------|-----|----|---------|---------|--------|
| ATOM | 1017 | HG2  | PRO | 65 | 0.595   | -22.705 | 2.968  |
| ATOM | 1018 | HG3  | PRO | 65 | 1.287   | -23.369 | 1.990  |
| ATOM | 1019 | CB   | PRO | 65 | -0.368  | -22.919 | 1.600  |
| ATOM | 1020 | HB2  | PRO | 65 | -0.358  | -23.700 | 1.216  |
| ATOM | 1021 | HB3  | PRO | 65 | -1.020  | -22.907 | 2.230  |
| ATOM | 1022 | CA   | PRO | 65 | -0.501  | -21.924 | 0.666  |
| ATOM | 1023 | HA   | PRO | 65 | -0.463  | -22.357 | -0.229 |
| ATOM | 1024 | C    | PRO | 65 | -1.776  | -21.269 | 0.821  |
| ATOM | 1025 | O    | PRO | 65 | -2.681  | -21.782 | 0.450  |
| ATOM | 1026 | N    | GLU | 66 | -1.875  | -20.154 | 1.351  |
| ATOM | 1027 | H    | GLU | 66 | -1.107  | -19.777 | 1.642  |
| ATOM | 1028 | CA   | GLU | 66 | -3.037  | -19.443 | 1.551  |
| ATOM | 1029 | HA   | GLU | 66 | -3.815  | -20.033 | 1.241  |
| ATOM | 1030 | CB   | GLU | 66 | -3.220  | -19.159 | 2.950  |
| ATOM | 1031 | HB2  | GLU | 66 | -2.570  | -19.080 | 3.357  |
| ATOM | 1032 | HB3  | GLU | 66 | -3.578  | -18.486 | 3.096  |
| ATOM | 1033 | CG   | GLU | 66 | -3.803  | -19.877 | 3.622  |
| ATOM | 1034 | HG2  | GLU | 66 | -4.061  | -20.045 | 3.464  |
| ATOM | 1035 | HG3  | GLU | 66 | -3.601  | -20.139 | 3.630  |
| ATOM | 1036 | CD   | GLU | 66 | -4.312  | -20.009 | 4.505  |
| ATOM | 1037 | OE1  | GLU | 66 | -4.439  | -20.081 | 4.884  |
| ATOM | 1038 | OE2  | GLU | 66 | -4.602  | -20.050 | 4.836  |
| ATOM | 1039 | C    | GLU | 66 | -3.126  | -18.226 | 0.772  |
| ATOM | 1040 | O    | GLU | 66 | -4.136  | -17.809 | 0.513  |
| ATOM | 1041 | N    | MET | 67 | -2.105  | -17.684 | 0.322  |
| ATOM | 1042 | H    | MET | 67 | -1.303  | -18.050 | 0.577  |
| ATOM | 1043 | CA   | MET | 67 | -2.105  | -16.568 | -0.498 |
| ATOM | 1044 | HA   | MET | 67 | -2.790  | -15.918 | -0.139 |
| ATOM | 1045 | CB   | MET | 67 | -0.829  | -15.880 | -0.436 |
| ATOM | 1046 | HB2  | MET | 67 | -0.351  | -16.155 | 0.103  |
| ATOM | 1047 | HB3  | MET | 67 | -0.403  | -15.929 | -1.082 |
| ATOM | 1048 | CG   | MET | 67 | -0.760  | -14.737 | -0.219 |
| ATOM | 1049 | HG2  | MET | 67 | -0.991  | -14.587 | -0.518 |
| ATOM | 1050 | HG3  | MET | 67 | -0.996  | -14.724 | 0.103  |
| ATOM | 1051 | SD   | MET | 67 | 0.060   | -13.616 | -0.007 |
| ATOM | 1052 | CE   | MET | 67 | 0.124   | -13.008 | 1.071  |
| ATOM | 1053 | HE1  | MET | 67 | 0.144   | -12.885 | 1.296  |
| ATOM | 1054 | HE2  | MET | 67 | 0.133   | -12.876 | 1.291  |
| ATOM | 1055 | HE3  | MET | 67 | 0.133   | -12.889 | 1.279  |
| ATOM | 1056 | C    | MET | 67 | -2.510  | -16.890 | -1.861 |
| ATOM | 1057 | O    | MET | 67 | -2.819  | -16.070 | -2.602 |
| ATOM | 1058 | N    | VAL | 68 | -2.580  | -18.089 | -2.189 |
| ATOM | 1059 | H    | VAL | 68 | -2.286  | -18.708 | -1.547 |
| ATOM | 1060 | CA   | VAL | 68 | -3.079  | -18.568 | -3.407 |
| ATOM | 1061 | HA   | VAL | 68 | -2.682  | -18.003 | -4.162 |
| ATOM | 1062 | CB   | VAL | 68 | -2.661  | -19.928 | -3.600 |
| ATOM | 1063 | HB   | VAL | 68 | -2.880  | -20.191 | -4.163 |
| ATOM | 1064 | CG1  | VAL | 68 | -1.712  | -20.210 | -3.689 |
| ATOM | 1065 | HG11 | VAL | 68 | -1.481  | -20.288 | -3.700 |
| ATOM | 1066 | HG12 | VAL | 68 | -1.511  | -20.242 | -3.745 |
| ATOM | 1067 | HG13 | VAL | 68 | -1.453  | -20.318 | -3.701 |
| ATOM | 1068 | CG2  | VAL | 68 | -2.852  | -20.703 | -3.001 |
| ATOM | 1069 | HG21 | VAL | 68 | -2.921  | -20.931 | -2.859 |
| ATOM | 1070 | HG22 | VAL | 68 | -2.874  | -20.896 | -2.878 |
| ATOM | 1071 | HG23 | VAL | 68 | -2.900  | -20.873 | -2.834 |
| ATOM | 1072 | C    | VAL | 68 | -4.513  | -18.444 | -3.580 |
| ATOM | 1073 | O    | VAL | 68 | -4.990  | -18.539 | -4.630 |
| ATOM | 1074 | N    | THR | 69 | -5.208  | -18.193 | -2.575 |
| ATOM | 1075 | H    | THR | 69 | -4.766  | -18.151 | -1.738 |
| ATOM | 1076 | CA   | THR | 69 | -6.581  | -17.958 | -2.602 |
| ATOM | 1077 | HA   | THR | 69 | -6.985  | -18.483 | -3.360 |
| ATOM | 1078 | CB   | THR | 69 | -7.177  | -18.434 | -1.375 |
| ATOM | 1079 | HB   | THR | 69 | -8.070  | -18.167 | -1.358 |
| ATOM | 1080 | CG2  | THR | 69 | -7.149  | -19.747 | -1.171 |
| ATOM | 1081 | HG21 | THR | 69 | -7.148  | -20.076 | -1.127 |
| ATOM | 1082 | HG22 | THR | 69 | -7.144  | -20.059 | -1.120 |
| ATOM | 1083 | HG23 | THR | 69 | -7.160  | -20.068 | -1.119 |
| ATOM | 1084 | OG1  | THR | 69 | -6.656  | -18.012 | -0.392 |
| ATOM | 1085 | HG1  | THR | 69 | -6.474  | -18.250 | 0.013  |
| ATOM | 1086 | C    | THR | 69 | -6.977  | -16.570 | -2.885 |
| ATOM | 1087 | O    | THR | 69 | -8.072  | -16.300 | -3.095 |
| ATOM | 1088 | N    | LEU | 70 | -6.108  | -15.682 | -2.926 |
| ATOM | 1089 | H    | LEU | 70 | -5.233  | -15.965 | -2.750 |
| ATOM | 1090 | CA   | LEU | 70 | -6.331  | -14.329 | -3.282 |
| ATOM | 1091 | HA   | LEU | 70 | -7.179  | -14.025 | -2.790 |
| ATOM | 1092 | CB   | LEU | 70 | -5.199  | -13.530 | -2.779 |
| ATOM | 1093 | HB2  | LEU | 70 | -5.010  | -13.697 | -1.943 |
| ATOM | 1094 | HB3  | LEU | 70 | -4.518  | -13.753 | -3.209 |
| ATOM | 1095 | CG   | LEU | 70 | -5.174  | -12.234 | -2.797 |
| ATOM | 1096 | HG   | LEU | 70 | -5.450  | -12.034 | -3.585 |
| ATOM | 1097 | CD1  | LEU | 70 | -5.808  | -11.625 | -1.922 |
| ATOM | 1098 | HD11 | LEU | 70 | -5.940  | -11.479 | -1.686 |
| ATOM | 1099 | HD12 | LEU | 70 | -5.969  | -11.453 | -1.728 |
| ATOM | 1100 | HD13 | LEU | 70 | -5.984  | -11.490 | -1.712 |
| ATOM | 1101 | CD2  | LEU | 70 | -4.094  | -11.761 | -2.604 |
| ATOM | 1102 | HD21 | LEU | 70 | -3.856  | -11.608 | -2.508 |
| ATOM | 1103 | HD22 | LEU | 70 | -3.801  | -11.702 | -2.545 |
| ATOM | 1104 | HD23 | LEU | 70 | -3.833  | -11.626 | -2.635 |
| ATOM | 1105 | C    | LEU | 70 | -6.523  | -14.169 | -4.765 |
| ATOM | 1106 | O    | LEU | 70 | -5.706  | -14.634 | -5.490 |
| ATOM | 1107 | N    | PRO | 71 | -7.553  | -13.530 | -5.247 |
| ATOM | 1108 | CD   | PRO | 71 | -8.667  | -13.065 | -4.528 |
| ATOM | 1109 | HD2  | PRO | 71 | -8.430  | -12.243 | -3.976 |
| ATOM | 1110 | HD3  | PRO | 71 | -9.056  | -13.797 | -3.916 |
| ATOM | 1111 | CG   | PRO | 71 | -9.652  | -12.697 | -5.511 |
| ATOM | 1112 | HG2  | PRO | 71 | -9.902  | -11.834 | -5.392 |
| ATOM | 1113 | HG3  | PRO | 71 | -10.379 | -13.245 | -5.455 |
| ATOM | 1114 | CB   | PRO | 71 | -9.124  | -12.815 | -6.771 |
| ATOM | 1115 | HB2  | PRO | 71 | -9.685  | -13.398 | -7.249 |
| ATOM | 1116 | HB3  | PRO | 71 | -9.121  | -11.969 | -7.186 |
| ATOM | 1117 | CA   | PRO | 71 | -7.759  | -13.344 | -6.642 |
| ATOM | 1118 | HA   | PRO | 71 | -7.726  | -14.278 | -7.106 |
| ATOM | 1119 | C    | PRO | 71 | -6.741  | -12.448 | -7.285 |
| ATOM | 1120 | O    | PRO | 71 | -6.426  | -11.423 | -6.773 |
| ATOM | 1121 | N    | LEU | 72 | -6.245  | -12.831 | -8.418 |

|      |      |      |     |    |        |         |         |
|------|------|------|-----|----|--------|---------|---------|
| ATOM | 1122 | H    | LEU | 72 | -6.559 | -13.671 | -8.770  |
| ATOM | 1123 | CA   | LEU | 72 | -5.273 | -12.139 | -9.194  |
| ATOM | 1124 | HA   | LEU | 72 | -5.374 | -11.119 | -9.028  |
| ATOM | 1125 | CB   | LEU | 72 | -3.944 | -12.553 | -8.763  |
| ATOM | 1126 | HB2  | LEU | 72 | -3.910 | -12.797 | -8.445  |
| ATOM | 1127 | HB3  | LEU | 72 | -3.690 | -12.798 | -8.991  |
| ATOM | 1128 | CG   | LEU | 72 | -2.975 | -12.336 | -8.454  |
| ATOM | 1129 | HG   | LEU | 72 | -3.215 | -12.466 | -8.672  |
| ATOM | 1130 | CD1  | LEU | 72 | -2.223 | -12.063 | -8.200  |
| ATOM | 1131 | HD11 | LEU | 72 | -2.042 | -11.987 | -8.199  |
| ATOM | 1132 | HD12 | LEU | 72 | -2.026 | -12.032 | -8.121  |
| ATOM | 1133 | HD13 | LEU | 72 | -2.048 | -11.974 | -8.092  |
| ATOM | 1134 | CD2  | LEU | 72 | -2.353 | -12.234 | -8.082  |
| ATOM | 1135 | HD21 | LEU | 72 | -2.181 | -12.147 | -8.013  |
| ATOM | 1136 | HD22 | LEU | 72 | -2.180 | -12.246 | -8.015  |
| ATOM | 1137 | HD23 | LEU | 72 | -2.241 | -12.240 | -7.946  |
| ATOM | 1138 | C    | LEU | 72 | -5.452 | -12.384 | -10.653 |
| ATOM | 1139 | O    | LEU | 72 | -5.841 | -13.413 | -11.025 |
| ATOM | 1140 | N    | GLN | 73 | -5.126 | -11.462 | -11.484 |
| ATOM | 1141 | H    | GLN | 73 | -4.866 | -10.634 | -11.107 |
| ATOM | 1142 | CA   | GLN | 73 | -5.105 | -11.570 | -12.903 |
| ATOM | 1143 | HA   | GLN | 73 | -5.356 | -12.521 | -13.156 |
| ATOM | 1144 | CB   | GLN | 73 | -6.099 | -10.693 | -13.489 |
| ATOM | 1145 | HB2  | GLN | 73 | -6.184 | -10.114 | -13.139 |
| ATOM | 1146 | HB3  | GLN | 73 | -5.968 | -10.462 | -14.157 |
| ATOM | 1147 | CG   | GLN | 73 | -7.177 | -10.903 | -13.669 |
| ATOM | 1148 | HG2  | GLN | 73 | -7.351 | -11.380 | -13.672 |
| ATOM | 1149 | HG3  | GLN | 73 | -7.406 | -10.766 | -13.334 |
| ATOM | 1150 | CD   | GLN | 73 | -7.743 | -10.647 | -14.302 |
| ATOM | 1151 | OE1  | GLN | 73 | -7.628 | -10.681 | -14.855 |
| ATOM | 1152 | NE2  | GLN | 73 | -8.373 | -10.380 | -14.253 |
| ATOM | 1153 | HE21 | GLN | 73 | -8.477 | -10.342 | -13.803 |
| ATOM | 1154 | HE22 | GLN | 73 | -8.745 | -10.217 | -14.671 |
| ATOM | 1155 | C    | GLN | 73 | -3.773 | -11.295 | -13.461 |
| ATOM | 1156 | O    | GLN | 73 | -3.449 | -10.237 | -13.741 |
| ATOM | 1157 | N    | PRO | 74 | -2.975 | -12.211 | -13.622 |
| ATOM | 1158 | CD   | PRO | 74 | -3.220 | -13.509 | -13.341 |
| ATOM | 1159 | HD2  | PRO | 74 | -3.829 | -13.876 | -13.972 |
| ATOM | 1160 | HD3  | PRO | 74 | -3.583 | -13.677 | -12.405 |
| ATOM | 1161 | CG   | PRO | 74 | -2.021 | -14.113 | -13.492 |
| ATOM | 1162 | HG2  | PRO | 74 | -2.033 | -14.665 | -14.098 |
| ATOM | 1163 | HG3  | PRO | 74 | -1.829 | -14.482 | -12.759 |
| ATOM | 1164 | CB   | PRO | 74 | -1.102 | -13.270 | -13.845 |
| ATOM | 1165 | HB2  | PRO | 74 | -0.532 | -13.306 | -13.222 |
| ATOM | 1166 | HB3  | PRO | 74 | -0.716 | -13.519 | -14.604 |
| ATOM | 1167 | CA   | PRO | 74 | -1.660 | -12.010 | -13.967 |
| ATOM | 1168 | HA   | PRO | 74 | -1.271 | -11.430 | -13.281 |
| ATOM | 1169 | C    | PRO | 74 | -1.340 | -11.409 | -15.281 |
| ATOM | 1170 | O    | PRO | 74 | -0.358 | -10.882 | -15.488 |
| ATOM | 1171 | N    | SER | 75 | -2.155 | -11.459 | -16.164 |
| ATOM | 1172 | H    | SER | 75 | -2.938 | -11.919 | -15.947 |
| ATOM | 1173 | CA   | SER | 75 | -1.989 | -10.896 | -17.448 |
| ATOM | 1174 | HA   | SER | 75 | -1.000 | -10.757 | -17.637 |
| ATOM | 1175 | CB   | SER | 75 | -2.467 | -11.815 | -18.413 |
| ATOM | 1176 | HB2  | SER | 75 | -3.018 | -11.780 | -18.665 |
| ATOM | 1177 | HB3  | SER | 75 | -2.207 | -11.885 | -18.965 |
| ATOM | 1178 | OG   | SER | 75 | -2.532 | -12.620 | -18.294 |
| ATOM | 1179 | HG   | SER | 75 | -2.641 | -12.989 | -18.545 |
| ATOM | 1180 | C    | SER | 75 | -2.590 | -9.576  | -17.647 |
| ATOM | 1181 | O    | SER | 75 | -2.543 | -9.042  | -18.624 |
| ATOM | 1182 | N    | SER | 76 | -3.149 | -9.031  | -16.737 |
| ATOM | 1183 | H    | SER | 76 | -3.140 | -9.505  | -15.959 |
| ATOM | 1184 | CA   | SER | 76 | -3.738 | -7.750  | -16.796 |
| ATOM | 1185 | HA   | SER | 76 | -4.162 | -7.617  | -17.703 |
| ATOM | 1186 | CB   | SER | 76 | -4.772 | -7.690  | -15.816 |
| ATOM | 1187 | HB2  | SER | 76 | -5.332 | -7.501  | -15.802 |
| ATOM | 1188 | HB3  | SER | 76 | -4.988 | -8.085  | -15.609 |
| ATOM | 1189 | OG   | SER | 76 | -4.764 | -7.360  | -15.200 |
| ATOM | 1190 | HG   | SER | 76 | -5.046 | -7.727  | -14.946 |
| ATOM | 1191 | C    | SER | 76 | -2.804 | -6.635  | -16.644 |
| ATOM | 1192 | O    | SER | 76 | -1.824 | -6.778  | -16.014 |
| ATOM | 1193 | N    | THR | 77 | -3.116 | -5.492  | -17.181 |
| ATOM | 1194 | H    | THR | 77 | -3.930 | -5.428  | -17.681 |
| ATOM | 1195 | CA   | THR | 77 | -2.326 | -4.299  | -17.060 |
| ATOM | 1196 | HA   | THR | 77 | -1.355 | -4.514  | -17.406 |
| ATOM | 1197 | CB   | THR | 77 | -2.876 | -3.203  | -17.907 |
| ATOM | 1198 | HB   | THR | 77 | -2.942 | -2.594  | -17.609 |
| ATOM | 1199 | CG2  | THR | 77 | -2.457 | -2.865  | -18.785 |
| ATOM | 1200 | HG21 | THR | 77 | -2.364 | -2.806  | -19.000 |
| ATOM | 1201 | HG22 | THR | 77 | -2.328 | -2.785  | -18.985 |
| ATOM | 1202 | HG23 | THR | 77 | -2.367 | -2.743  | -19.012 |
| ATOM | 1203 | OG1  | THR | 77 | -3.717 | -3.241  | -18.306 |
| ATOM | 1204 | HG1  | THR | 77 | -4.011 | -2.954  | -18.679 |
| ATOM | 1205 | C    | THR | 77 | -2.187 | -3.822  | -15.639 |
| ATOM | 1206 | O    | THR | 77 | -1.136 | -3.387  | -15.255 |
| ATOM | 1207 | N    | MET | 78 | -3.202 | -3.965  | -14.823 |
| ATOM | 1208 | H    | MET | 78 | -4.034 | -4.331  | -15.191 |
| ATOM | 1209 | CA   | MET | 78 | -3.164 | -3.604  | -13.419 |
| ATOM | 1210 | HA   | MET | 78 | -2.712 | -2.640  | -13.330 |
| ATOM | 1211 | CB   | MET | 78 | -4.567 | -3.508  | -12.877 |
| ATOM | 1212 | HB2  | MET | 78 | -5.041 | -4.413  | -12.956 |
| ATOM | 1213 | HB3  | MET | 78 | -4.519 | -3.270  | -11.878 |
| ATOM | 1214 | CG   | MET | 78 | -5.409 | -2.510  | -13.534 |
| ATOM | 1215 | HG2  | MET | 78 | -5.684 | -2.772  | -14.178 |
| ATOM | 1216 | HG3  | MET | 78 | -6.084 | -2.280  | -13.149 |
| ATOM | 1217 | SD   | MET | 78 | -4.990 | -1.272  | -13.904 |
| ATOM | 1218 | CE   | MET | 78 | -5.803 | -0.899  | -14.884 |
| ATOM | 1219 | HE1  | MET | 78 | -5.981 | -0.818  | -15.075 |
| ATOM | 1220 | HE2  | MET | 78 | -5.959 | -0.816  | -15.086 |
| ATOM | 1221 | HE3  | MET | 78 | -5.964 | -0.839  | -15.087 |
| ATOM | 1222 | C    | MET | 78 | -2.308 | -4.543  | -12.585 |
| ATOM | 1223 | O    | MET | 78 | -1.663 | -4.115  | -11.649 |
| ATOM | 1224 | N    | GLY | 79 | -2.213 | -5.797  | -12.969 |
| ATOM | 1225 | H    | GLY | 79 | -2.776 | -6.097  | -13.725 |
| ATOM | 1226 | CA   | GLY | 79 | -1.260 | -6.732  | -12.414 |

|      |      |      |     |    |        |         |         |
|------|------|------|-----|----|--------|---------|---------|
| ATOM | 1227 | HA2  | GLY | 79 | -1.404 | -6.808  | -11.364 |
| ATOM | 1228 | HA3  | GLY | 79 | -1.433 | -7.686  | -12.851 |
| ATOM | 1229 | C    | GLY | 79 | 0.178  | -6.344  | -12.666 |
| ATOM | 1230 | O    | GLY | 79 | 0.989  | -6.392  | -11.769 |
| ATOM | 1231 | N    | GLN | 80 | 0.484  | -5.865  | -13.856 |
| ATOM | 1232 | H    | GLN | 80 | -0.223 | -5.862  | -14.545 |
| ATOM | 1233 | CA   | GLN | 80 | 1.796  | -5.358  | -14.215 |
| ATOM | 1234 | HA   | GLN | 80 | 2.527  | -6.079  | -13.917 |
| ATOM | 1235 | CB   | GLN | 80 | 1.885  | -5.193  | -15.716 |
| ATOM | 1236 | HB2  | GLN | 80 | 1.266  | -5.034  | -16.097 |
| ATOM | 1237 | HB3  | GLN | 80 | 2.310  | -4.647  | -15.959 |
| ATOM | 1238 | CG   | GLN | 80 | 2.247  | -5.961  | -16.405 |
| ATOM | 1239 | HG2  | GLN | 80 | 2.467  | -6.203  | -16.376 |
| ATOM | 1240 | HG3  | GLN | 80 | 2.006  | -6.114  | -16.395 |
| ATOM | 1241 | CD   | GLN | 80 | 2.643  | -6.200  | -17.177 |
| ATOM | 1242 | OE1  | GLN | 80 | 2.892  | -5.989  | -17.376 |
| ATOM | 1243 | NE2  | GLN | 80 | 2.719  | -6.647  | -17.646 |
| ATOM | 1244 | HE21 | GLN | 80 | 2.975  | -6.804  | -18.154 |
| ATOM | 1245 | HE22 | GLN | 80 | 2.523  | -6.833  | -17.498 |
| ATOM | 1246 | C    | GLN | 80 | 2.152  | -4.070  | -13.489 |
| ATOM | 1247 | O    | GLN | 80 | 3.275  | -3.920  | -13.065 |
| ATOM | 1248 | N    | VAL | 81 | 1.205  | -3.175  | -13.262 |
| ATOM | 1249 | H    | VAL | 81 | 0.319  | -3.327  | -13.670 |
| ATOM | 1250 | CA   | VAL | 81 | 1.399  | -1.997  | -12.420 |
| ATOM | 1251 | HA   | VAL | 81 | 2.273  | -1.480  | -12.761 |
| ATOM | 1252 | CB   | VAL | 81 | 0.228  | -1.034  | -12.529 |
| ATOM | 1253 | HB   | VAL | 81 | -0.597 | -1.526  | -12.362 |
| ATOM | 1254 | CG1  | VAL | 81 | 0.237  | 0.054   | -11.631 |
| ATOM | 1255 | HG11 | VAL | 81 | 0.236  | 0.334   | -11.423 |
| ATOM | 1256 | HG12 | VAL | 81 | 0.215  | 0.309   | -11.409 |
| ATOM | 1257 | HG13 | VAL | 81 | 0.245  | 0.320   | -11.401 |
| ATOM | 1258 | CG2  | VAL | 81 | 0.100  | -0.431  | -13.792 |
| ATOM | 1259 | HG21 | VAL | 81 | 0.060  | -0.252  | -14.109 |
| ATOM | 1260 | HG22 | VAL | 81 | 0.082  | -0.278  | -14.106 |
| ATOM | 1261 | HG23 | VAL | 81 | 0.050  | -0.320  | -14.092 |
| ATOM | 1262 | C    | VAL | 81 | 1.666  | -2.394  | -10.977 |
| ATOM | 1263 | O    | VAL | 81 | 2.586  | -1.882  | -10.376 |
| ATOM | 1264 | N    | GLY | 82 | 0.944  | -3.362  | -10.436 |
| ATOM | 1265 | H    | GLY | 82 | 0.191  | -3.732  | -10.965 |
| ATOM | 1266 | CA   | GLY | 82 | 1.193  | -3.913  | -9.113  |
| ATOM | 1267 | HA2  | GLY | 82 | 1.083  | -3.147  | -8.379  |
| ATOM | 1268 | HA3  | GLY | 82 | 0.467  | -4.670  | -8.920  |
| ATOM | 1269 | C    | GLY | 82 | 2.572  | -4.529  | -8.952  |
| ATOM | 1270 | O    | GLY | 82 | 3.215  | -4.316  | -7.948  |
| ATOM | 1271 | N    | ARG | 83 | 3.072  | -5.220  | -9.965  |
| ATOM | 1272 | H    | ARG | 83 | 2.476  | -5.380  | -10.738 |
| ATOM | 1273 | CA   | ARG | 83 | 4.429  | -5.760  | -10.008 |
| ATOM | 1274 | HA   | ARG | 83 | 4.608  | -6.303  | -9.095  |
| ATOM | 1275 | CB   | ARG | 83 | 4.545  | -6.728  | -11.176 |
| ATOM | 1276 | HB2  | ARG | 83 | 3.773  | -7.234  | -11.261 |
| ATOM | 1277 | HB3  | ARG | 83 | 4.643  | -6.291  | -11.995 |
| ATOM | 1278 | CG   | ARG | 83 | 5.549  | -7.624  | -11.130 |
| ATOM | 1279 | HG2  | ARG | 83 | 6.282  | -7.218  | -11.069 |
| ATOM | 1280 | HG3  | ARG | 83 | 5.460  | -8.026  | -10.398 |
| ATOM | 1281 | CD   | ARG | 83 | 5.683  | -8.541  | -12.164 |
| ATOM | 1282 | HD2  | ARG | 83 | 5.557  | -8.795  | -12.234 |
| ATOM | 1283 | HD3  | ARG | 83 | 5.650  | -8.598  | -12.519 |
| ATOM | 1284 | NE   | ARG | 83 | 6.025  | -9.021  | -12.593 |
| ATOM | 1285 | HE   | ARG | 83 | 6.113  | -8.976  | -12.454 |
| ATOM | 1286 | CZ   | ARG | 83 | 6.233  | -9.524  | -13.156 |
| ATOM | 1287 | NH1  | ARG | 83 | 6.519  | -9.907  | -13.476 |
| ATOM | 1288 | HH11 | ARG | 83 | 6.582  | -9.824  | -13.297 |
| ATOM | 1289 | HH12 | ARG | 83 | 6.676  | -10.286 | -13.904 |
| ATOM | 1290 | NH2  | ARG | 83 | 6.165  | -9.662  | -13.419 |
| ATOM | 1291 | HH21 | ARG | 83 | 5.962  | -9.391  | -13.212 |
| ATOM | 1292 | HH22 | ARG | 83 | 6.331  | -10.054 | -13.852 |
| ATOM | 1293 | C    | ARG | 83 | 5.487  | -4.675  | -10.072 |
| ATOM | 1294 | O    | ARG | 83 | 6.461  | -4.755  | -9.359  |
| ATOM | 1295 | N    | GLN | 84 | 5.278  | -3.641  | -10.861 |
| ATOM | 1296 | H    | GLN | 84 | 4.466  | -3.651  | -11.426 |
| ATOM | 1297 | CA   | GLN | 84 | 6.185  | -2.514  | -10.978 |
| ATOM | 1298 | HA   | GLN | 84 | 7.177  | -2.891  | -11.122 |
| ATOM | 1299 | CB   | GLN | 84 | 5.816  | -1.693  | -12.197 |
| ATOM | 1300 | HB2  | GLN | 84 | 5.209  | -1.830  | -12.564 |
| ATOM | 1301 | HB3  | GLN | 84 | 5.704  | -0.999  | -12.123 |
| ATOM | 1302 | CG   | GLN | 84 | 6.421  | -1.609  | -13.040 |
| ATOM | 1303 | HG2  | GLN | 84 | 6.720  | -1.492  | -13.080 |
| ATOM | 1304 | HG3  | GLN | 84 | 6.426  | -1.888  | -12.984 |
| ATOM | 1305 | CD   | GLN | 84 | 6.622  | -1.296  | -13.930 |
| ATOM | 1306 | OE1  | GLN | 84 | 6.417  | -1.293  | -14.191 |
| ATOM | 1307 | NE2  | GLN | 84 | 7.030  | -1.019  | -14.434 |
| ATOM | 1308 | HE21 | GLN | 84 | 7.154  | -0.816  | -15.012 |
| ATOM | 1309 | HE22 | GLN | 84 | 7.209  | -1.011  | -14.242 |
| ATOM | 1310 | C    | GLN | 84 | 6.228  | -1.669  | -9.718  |
| ATOM | 1311 | O    | GLN | 84 | 7.275  | -1.231  | -9.333  |
| ATOM | 1312 | N    | LEU | 85 | 5.120  | -1.497  | -9.028  |
| ATOM | 1313 | H    | LEU | 85 | 4.281  | -1.831  | -9.420  |
| ATOM | 1314 | CA   | LEU | 85 | 5.055  | -0.841  | -7.737  |
| ATOM | 1315 | HA   | LEU | 85 | 5.597  | 0.079   | -7.803  |
| ATOM | 1316 | CB   | LEU | 85 | 3.602  | -0.532  | -7.420  |
| ATOM | 1317 | HB2  | LEU | 85 | 3.098  | -0.744  | -7.934  |
| ATOM | 1318 | HB3  | LEU | 85 | 3.333  | -0.877  | -6.823  |
| ATOM | 1319 | CG   | LEU | 85 | 3.138  | 0.497   | -7.212  |
| ATOM | 1320 | HG   | LEU | 85 | 3.361  | 0.236   | -7.242  |
| ATOM | 1321 | CD1  | LEU | 85 | 2.762  | 1.223   | -7.158  |
| ATOM | 1322 | HD11 | LEU | 85 | 2.665  | 1.379   | -7.118  |
| ATOM | 1323 | HD12 | LEU | 85 | 2.701  | 1.393   | -7.117  |
| ATOM | 1324 | HD13 | LEU | 85 | 2.650  | 1.425   | -7.195  |
| ATOM | 1325 | CD2  | LEU | 85 | 2.675  | 1.181   | -6.996  |
| ATOM | 1326 | HD21 | LEU | 85 | 2.541  | 1.307   | -6.902  |
| ATOM | 1327 | HD22 | LEU | 85 | 2.590  | 1.379   | -6.912  |
| ATOM | 1328 | HD23 | LEU | 85 | 2.555  | 1.355   | -7.016  |
| ATOM | 1329 | C    | LEU | 85 | 5.721  | -1.653  | -6.632  |
| ATOM | 1330 | O    | LEU | 85 | 6.297  | -1.096  | -5.730  |
| ATOM | 1331 | N    | ALA | 86 | 5.700  | -2.962  | -6.717  |

|      |      |      |     |    |        |        |        |
|------|------|------|-----|----|--------|--------|--------|
| ATOM | 1332 | H    | ALA | 86 | 5.171  | -3.367 | -7.442 |
| ATOM | 1333 | CA   | ALA | 86 | 6.382  | -3.835 | -5.790 |
| ATOM | 1334 | HA   | ALA | 86 | 6.177  | -3.506 | -4.793 |
| ATOM | 1335 | CB   | ALA | 86 | 5.809  | -5.222 | -5.933 |
| ATOM | 1336 | HB1  | ALA | 86 | 5.660  | -5.563 | -5.971 |
| ATOM | 1337 | HB2  | ALA | 86 | 5.683  | -5.564 | -5.967 |
| ATOM | 1338 | HB3  | ALA | 86 | 5.673  | -5.555 | -5.949 |
| ATOM | 1339 | C    | ALA | 86 | 7.894  | -3.815 | -5.943 |
| ATOM | 1340 | O    | ALA | 86 | 8.598  | -3.843 | -4.967 |
| ATOM | 1341 | N    | ILE | 87 | 8.408  | -3.712 | -7.138 |
| ATOM | 1342 | H    | ILE | 87 | 7.783  | -3.706 | -7.896 |
| ATOM | 1343 | CA   | ILE | 87 | 9.830  | -3.738 | -7.395 |
| ATOM | 1344 | HA   | ILE | 87 | 10.225 | -4.504 | -6.807 |
| ATOM | 1345 | CB   | ILE | 87 | 10.101 | -4.080 | -8.830 |
| ATOM | 1346 | HB   | ILE | 87 | 9.460  | -4.305 | -9.129 |
| ATOM | 1347 | CG2  | ILE | 87 | 10.479 | -3.336 | -9.613 |
| ATOM | 1348 | HG21 | ILE | 87 | 10.544 | -3.137 | -9.760 |
| ATOM | 1349 | HG22 | ILE | 87 | 10.617 | -3.150 | -9.828 |
| ATOM | 1350 | HG23 | ILE | 87 | 10.547 | -3.178 | -9.843 |
| ATOM | 1351 | CG1  | ILE | 87 | 10.819 | -4.917 | -9.135 |
| ATOM | 1352 | HG12 | ILE | 87 | 11.123 | -5.071 | -9.404 |
| ATOM | 1353 | HG13 | ILE | 87 | 10.897 | -4.835 | -8.866 |
| ATOM | 1354 | CD1  | ILE | 87 | 11.028 | -5.695 | -9.466 |
| ATOM | 1355 | HD11 | ILE | 87 | 11.085 | -5.876 | -9.535 |
| ATOM | 1356 | HD12 | ILE | 87 | 11.072 | -5.886 | -9.546 |
| ATOM | 1357 | HD13 | ILE | 87 | 11.089 | -5.900 | -9.559 |
| ATOM | 1358 | C    | ILE | 87 | 10.545 | -2.508 | -6.943 |
| ATOM | 1359 | O    | ILE | 87 | 11.643 | -2.590 | -6.497 |
| ATOM | 1360 | N    | ILE | 88 | 9.919  | -1.378 | -6.964 |
| ATOM | 1361 | H    | ILE | 88 | 9.033  | -1.358 | -7.362 |
| ATOM | 1362 | CA   | ILE | 88 | 10.464 | -0.170 | -6.417 |
| ATOM | 1363 | HA   | ILE | 88 | 11.490 | -0.170 | -6.638 |
| ATOM | 1364 | CB   | ILE | 88 | 9.890  | 1.049  | -7.061 |
| ATOM | 1365 | HB   | ILE | 88 | 10.315 | 1.777  | -6.697 |
| ATOM | 1366 | CG2  | ILE | 88 | 10.148 | 1.090  | -8.348 |
| ATOM | 1367 | HG21 | ILE | 88 | 10.264 | 1.096  | -8.642 |
| ATOM | 1368 | HG22 | ILE | 88 | 10.194 | 1.154  | -8.665 |
| ATOM | 1369 | HG23 | ILE | 88 | 10.190 | 1.066  | -8.682 |
| ATOM | 1370 | CG1  | ILE | 88 | 8.566  | 1.306  | -6.907 |
| ATOM | 1371 | HG12 | ILE | 88 | 8.094  | 0.743  | -7.363 |
| ATOM | 1372 | HG13 | ILE | 88 | 8.375  | 1.202  | -6.078 |
| ATOM | 1373 | CD1  | ILE | 88 | 8.093  | 2.460  | -7.229 |
| ATOM | 1374 | HD11 | ILE | 88 | 7.983  | 2.735  | -7.298 |
| ATOM | 1375 | HD12 | ILE | 88 | 7.971  | 2.731  | -7.314 |
| ATOM | 1376 | HD13 | ILE | 88 | 7.965  | 2.749  | -7.299 |
| ATOM | 1377 | C    | ILE | 88 | 10.393 | -0.106 | -4.923 |
| ATOM | 1378 | O    | ILE | 88 | 11.031 | 0.702  | -4.333 |
| ATOM | 1379 | N    | GLY | 89 | 9.670  | -0.987 | -4.300 |
| ATOM | 1380 | H    | GLY | 89 | 9.161  | -1.610 | -4.837 |
| ATOM | 1381 | CA   | GLY | 89 | 9.594  | -1.146 | -2.893 |
| ATOM | 1382 | HA2  | GLY | 89 | 9.351  | -0.243 | -2.478 |
| ATOM | 1383 | HA3  | GLY | 89 | 8.839  | -1.814 | -2.682 |
| ATOM | 1384 | C    | GLY | 89 | 10.818 | -1.652 | -2.227 |
| ATOM | 1385 | O    | GLY | 89 | 10.972 | -1.481 | -1.082 |
| ATOM | 1386 | N    | ASP | 90 | 11.713 | -2.227 | -2.929 |
| ATOM | 1387 | H    | ASP | 90 | 11.525 | -2.360 | -3.857 |
| ATOM | 1388 | CA   | ASP | 90 | 12.964 | -2.641 | -2.428 |
| ATOM | 1389 | HA   | ASP | 90 | 12.811 | -3.174 | -1.553 |
| ATOM | 1390 | CB   | ASP | 90 | 13.570 | -3.529 | -3.399 |
| ATOM | 1391 | HB2  | ASP | 90 | 12.911 | -4.248 | -3.653 |
| ATOM | 1392 | HB3  | ASP | 90 | 13.792 | -3.030 | -4.241 |
| ATOM | 1393 | CG   | ASP | 90 | 14.748 | -4.137 | -2.902 |
| ATOM | 1394 | OD1  | ASP | 90 | 15.104 | -4.481 | -2.615 |
| ATOM | 1395 | OD2  | ASP | 90 | 15.323 | -4.291 | -2.803 |
| ATOM | 1396 | C    | ASP | 90 | 13.870 | -1.525 | -2.099 |
| ATOM | 1397 | O    | ASP | 90 | 14.616 | -1.630 | -1.241 |
| ATOM | 1398 | N    | ASP | 91 | 13.770 | -0.432 | -2.726 |
| ATOM | 1399 | H    | ASP | 91 | 13.123 | -0.399 | -3.405 |
| ATOM | 1400 | CA   | ASP | 91 | 14.548 | 0.720  | -2.494 |
| ATOM | 1401 | HA   | ASP | 91 | 15.532 | 0.450  | -2.439 |
| ATOM | 1402 | CB   | ASP | 91 | 14.404 | 1.618  | -3.628 |
| ATOM | 1403 | HB2  | ASP | 91 | 14.559 | 1.096  | -4.489 |
| ATOM | 1404 | HB3  | ASP | 91 | 13.453 | 1.963  | -3.658 |
| ATOM | 1405 | CG   | ASP | 91 | 15.330 | 2.740  | -3.584 |
| ATOM | 1406 | OD1  | ASP | 91 | 15.902 | 3.063  | -3.639 |
| ATOM | 1407 | OD2  | ASP | 91 | 15.498 | 3.312  | -3.514 |
| ATOM | 1408 | C    | ASP | 91 | 14.234 | 1.385  | -1.237 |
| ATOM | 1409 | O    | ASP | 91 | 15.025 | 2.008  | -0.674 |
| ATOM | 1410 | N    | ILE | 92 | 13.100 | 1.216  | -0.763 |
| ATOM | 1411 | H    | ILE | 92 | 12.504 | 0.696  | -1.280 |
| ATOM | 1412 | CA   | ILE | 92 | 12.674 | 1.715  | 0.470  |
| ATOM | 1413 | HA   | ILE | 92 | 13.361 | 2.407  | 0.766  |
| ATOM | 1414 | CB   | ILE | 92 | 11.412 | 2.394  | 0.341  |
| ATOM | 1415 | HB   | ILE | 92 | 11.171 | 2.697  | 1.179  |
| ATOM | 1416 | CG2  | ILE | 92 | 11.574 | 3.434  | -0.420 |
| ATOM | 1417 | HG21 | ILE | 92 | 11.639 | 3.675  | -0.583 |
| ATOM | 1418 | HG22 | ILE | 92 | 11.586 | 3.684  | -0.642 |
| ATOM | 1419 | HG23 | ILE | 92 | 11.615 | 3.718  | -0.586 |
| ATOM | 1420 | CG1  | ILE | 92 | 10.325 | 1.693  | -0.090 |
| ATOM | 1421 | HG12 | ILE | 92 | 10.449 | 1.469  | -0.924 |
| ATOM | 1422 | HG13 | ILE | 92 | 10.282 | 0.982  | 0.374  |
| ATOM | 1423 | CD1  | ILE | 92 | 9.105  | 2.206  | -0.019 |
| ATOM | 1424 | HD11 | ILE | 92 | 8.797  | 2.298  | 0.028  |
| ATOM | 1425 | HD12 | ILE | 92 | 8.801  | 2.375  | 0.007  |
| ATOM | 1426 | HD13 | ILE | 92 | 8.820  | 2.300  | -0.044 |
| ATOM | 1427 | C    | ILE | 92 | 12.652 | 0.743  | 1.557  |
| ATOM | 1428 | O    | ILE | 92 | 12.352 | 1.049  | 2.605  |
| ATOM | 1429 | N    | ASN | 93 | 12.991 | -0.424 | 1.329  |
| ATOM | 1430 | H    | ASN | 93 | 13.216 | -0.616 | 0.450  |
| ATOM | 1431 | CA   | ASN | 93 | 13.023 | -1.444 | 2.272  |
| ATOM | 1432 | HA   | ASN | 93 | 12.279 | -1.295 | 2.920  |
| ATOM | 1433 | CB   | ASN | 93 | 12.770 | -2.665 | 1.602  |
| ATOM | 1434 | HB2  | ASN | 93 | 12.002 | -2.621 | 1.159  |
| ATOM | 1435 | HB3  | ASN | 93 | 13.387 | -2.833 | 1.011  |
| ATOM | 1436 | CG   | ASN | 93 | 12.694 | -3.733 | 2.309  |

|      |      |      |     |    |        |        |        |
|------|------|------|-----|----|--------|--------|--------|
| ATOM | 1437 | OD1  | ASN | 93 | 12.612 | -3.979 | 2.822  |
| ATOM | 1438 | ND2  | ASN | 93 | 12.714 | -4.401 | 2.356  |
| ATOM | 1439 | HD21 | ASN | 93 | 12.670 | -5.100 | 2.826  |
| ATOM | 1440 | HD22 | ASN | 93 | 12.785 | -4.215 | 1.939  |
| ATOM | 1441 | C    | ASN | 93 | 14.232 | -1.501 | 3.067  |
| ATOM | 1442 | O    | ASN | 93 | 14.224 | -1.864 | 4.115  |
| ATOM | 1443 | N    | ARG | 94 | 15.267 | -1.119 | 2.594  |
| ATOM | 1444 | H    | ARG | 94 | 15.207 | -0.832 | 1.731  |
| ATOM | 1445 | CA   | ARG | 94 | 16.460 | -1.053 | 3.281  |
| ATOM | 1446 | HA   | ARG | 94 | 16.518 | -1.853 | 3.891  |
| ATOM | 1447 | CB   | ARG | 94 | 17.549 | -1.100 | 2.364  |
| ATOM | 1448 | HB2  | ARG | 94 | 17.574 | -0.714 | 1.834  |
| ATOM | 1449 | HB3  | ARG | 94 | 18.124 | -0.929 | 2.597  |
| ATOM | 1450 | CG   | ARG | 94 | 17.861 | -1.890 | 1.855  |
| ATOM | 1451 | HG2  | ARG | 94 | 17.843 | -2.048 | 1.990  |
| ATOM | 1452 | HG3  | ARG | 94 | 17.699 | -2.021 | 1.841  |
| ATOM | 1453 | CD   | ARG | 94 | 18.443 | -2.297 | 1.169  |
| ATOM | 1454 | HD2  | ARG | 94 | 18.712 | -2.143 | 1.069  |
| ATOM | 1455 | HD3  | ARG | 94 | 18.612 | -2.489 | 1.266  |
| ATOM | 1456 | NE   | ARG | 94 | 18.435 | -2.640 | 0.513  |
| ATOM | 1457 | HE   | ARG | 94 | 18.404 | -2.504 | 0.421  |
| ATOM | 1458 | CZ   | ARG | 94 | 18.456 | -3.113 | 0.020  |
| ATOM | 1459 | NH1  | ARG | 94 | 18.499 | -3.354 | 0.044  |
| ATOM | 1460 | HH11 | ARG | 94 | 18.519 | -3.193 | 0.442  |
| ATOM | 1461 | HH12 | ARG | 94 | 18.496 | -3.704 | -0.345 |
| ATOM | 1462 | NH2  | ARG | 94 | 18.430 | -3.359 | -0.523 |
| ATOM | 1463 | HH21 | ARG | 94 | 18.393 | -3.190 | -0.559 |
| ATOM | 1464 | HH22 | ARG | 94 | 18.430 | -3.708 | -0.892 |
| ATOM | 1465 | C    | ARG | 94 | 16.528 | 0.102  | 4.112  |
| ATOM | 1466 | O    | ARG | 94 | 16.264 | 1.120  | 3.704  |
| ATOM | 1467 | N    | ARG | 95 | 16.880 | -0.061 | 5.274  |
| ATOM | 1468 | H    | ARG | 95 | 17.088 | -0.931 | 5.485  |
| ATOM | 1469 | CA   | ARG | 95 | 16.940 | 0.868  | 6.295  |
| ATOM | 1470 | HA   | ARG | 95 | 17.134 | 0.364  | 7.113  |
| ATOM | 1471 | CB   | ARG | 95 | 18.019 | 1.704  | 6.094  |
| ATOM | 1472 | HB2  | ARG | 95 | 18.319 | 1.835  | 5.722  |
| ATOM | 1473 | HB3  | ARG | 95 | 18.047 | 2.137  | 6.156  |
| ATOM | 1474 | CG   | ARG | 95 | 18.682 | 1.802  | 6.315  |
| ATOM | 1475 | HG2  | ARG | 95 | 18.606 | 1.720  | 6.463  |
| ATOM | 1476 | HG3  | ARG | 95 | 18.654 | 1.622  | 6.224  |
| ATOM | 1477 | CD   | ARG | 95 | 19.505 | 2.271  | 6.447  |
| ATOM | 1478 | HD2  | ARG | 95 | 19.716 | 2.224  | 6.330  |
| ATOM | 1479 | HD3  | ARG | 95 | 19.572 | 2.457  | 6.370  |
| ATOM | 1480 | NE   | ARG | 95 | 19.926 | 2.534  | 6.827  |
| ATOM | 1481 | HE   | ARG | 95 | 19.825 | 2.467  | 7.052  |
| ATOM | 1482 | CZ   | ARG | 95 | 20.429 | 2.852  | 6.911  |
| ATOM | 1483 | NH1  | ARG | 95 | 20.636 | 2.984  | 6.658  |
| ATOM | 1484 | HH11 | ARG | 95 | 20.420 | 2.844  | 6.389  |
| ATOM | 1485 | HH12 | ARG | 95 | 21.019 | 3.228  | 6.740  |
| ATOM | 1486 | NH2  | ARG | 95 | 20.742 | 3.047  | 7.261  |
| ATOM | 1487 | HH21 | ARG | 95 | 20.602 | 2.952  | 7.465  |
| ATOM | 1488 | HH22 | ARG | 95 | 21.119 | 3.286  | 7.326  |
| ATOM | 1489 | C    | ARG | 95 | 15.749 | 1.583  | 6.643  |
| ATOM | 1490 | O    | ARG | 95 | 15.731 | 2.091  | 7.492  |
| ATOM | 1491 | N    | TYR | 96 | 14.761 | 1.626  | 6.028  |
| ATOM | 1492 | H    | TYR | 96 | 14.850 | 1.197  | 5.342  |
| ATOM | 1493 | CA   | TYR | 96 | 13.604 | 2.375  | 6.272  |
| ATOM | 1494 | HA   | TYR | 96 | 13.777 | 3.006  | 7.065  |
| ATOM | 1495 | CB   | TYR | 96 | 13.325 | 3.194  | 5.123  |
| ATOM | 1496 | HB2  | TYR | 96 | 13.486 | 2.804  | 4.444  |
| ATOM | 1497 | HB3  | TYR | 96 | 12.540 | 3.377  | 5.086  |
| ATOM | 1498 | CG   | TYR | 96 | 13.835 | 4.286  | 4.905  |
| ATOM | 1499 | CD1  | TYR | 96 | 13.803 | 4.920  | 4.960  |
| ATOM | 1500 | HD1  | TYR | 96 | 13.419 | 4.633  | 5.160  |
| ATOM | 1501 | CE1  | TYR | 96 | 14.270 | 5.929  | 4.753  |
| ATOM | 1502 | HE1  | TYR | 96 | 14.248 | 6.412  | 4.794  |
| ATOM | 1503 | CZ   | TYR | 96 | 14.771 | 6.308  | 4.492  |
| ATOM | 1504 | OH   | TYR | 96 | 15.220 | 7.274  | 4.297  |
| ATOM | 1505 | HH   | TYR | 96 | 15.530 | 7.436  | 4.142  |
| ATOM | 1506 | CE2  | TYR | 96 | 14.802 | 5.678  | 4.435  |
| ATOM | 1507 | HE2  | TYR | 96 | 15.182 | 5.964  | 4.234  |
| ATOM | 1508 | CD2  | TYR | 96 | 14.336 | 4.671  | 4.641  |
| ATOM | 1509 | HD2  | TYR | 96 | 14.364 | 4.192  | 4.595  |
| ATOM | 1510 | C    | TYR | 96 | 12.438 | 1.585  | 6.651  |
| ATOM | 1511 | O    | TYR | 96 | 11.597 | 2.041  | 7.317  |
| ATOM | 1512 | N    | ASP | 97 | 12.383 | 0.391  | 6.290  |
| ATOM | 1513 | H    | ASP | 97 | 13.082 | 0.066  | 5.734  |
| ATOM | 1514 | CA   | ASP | 97 | 11.316 | -0.468 | 6.613  |
| ATOM | 1515 | HA   | ASP | 97 | 10.429 | -0.032 | 6.328  |
| ATOM | 1516 | CB   | ASP | 97 | 11.475 | -1.670 | 5.843  |
| ATOM | 1517 | HB2  | ASP | 97 | 11.545 | -1.442 | 4.882  |
| ATOM | 1518 | HB3  | ASP | 97 | 12.331 | -2.086 | 6.108  |
| ATOM | 1519 | CG   | ASP | 97 | 10.402 | -2.615 | 5.976  |
| ATOM | 1520 | OD1  | ASP | 97 | 9.973  | -2.987 | 6.087  |
| ATOM | 1521 | OD2  | ASP | 97 | 9.993  | -3.014 | 5.934  |
| ATOM | 1522 | C    | ASP | 97 | 11.191 | -0.743 | 8.048  |
| ATOM | 1523 | O    | ASP | 97 | 10.159 | -0.928 | 8.535  |
| ATOM | 1524 | N    | SER | 98 | 12.227 | -0.695 | 8.744  |
| ATOM | 1525 | H    | SER | 98 | 13.040 | -0.549 | 8.287  |
| ATOM | 1526 | CA   | SER | 98 | 12.250 | -0.811 | 10.137 |
| ATOM | 1527 | HA   | SER | 98 | 11.759 | -1.671 | 10.414 |
| ATOM | 1528 | CB   | SER | 98 | 13.624 | -0.915 | 10.555 |
| ATOM | 1529 | HB2  | SER | 98 | 13.913 | -0.500 | 10.925 |
| ATOM | 1530 | HB3  | SER | 98 | 13.808 | -1.381 | 10.890 |
| ATOM | 1531 | OG   | SER | 98 | 14.302 | -0.966 | 10.052 |
| ATOM | 1532 | HG   | SER | 98 | 14.613 | -1.039 | 10.049 |
| ATOM | 1533 | C    | SER | 98 | 11.571 | 0.265  | 10.859 |
| ATOM | 1534 | O    | SER | 98 | 11.088 | 0.078  | 11.905 |
| ATOM | 1535 | N    | GLU | 99 | 11.466 | 1.378  | 10.301 |
| ATOM | 1536 | H    | GLU | 99 | 11.871 | 1.473  | 9.443  |
| ATOM | 1537 | CA   | GLU | 99 | 10.736 | 2.447  | 10.841 |
| ATOM | 1538 | HA   | GLU | 99 | 10.938 | 2.534  | 11.838 |
| ATOM | 1539 | CB   | GLU | 99 | 11.168 | 3.661  | 10.178 |
| ATOM | 1540 | HB2  | GLU | 99 | 11.582 | 3.632  | 9.681  |
| ATOM | 1541 | HB3  | GLU | 99 | 10.739 | 4.014  | 9.902  |

|      |      |      |     |     |        |        |        |
|------|------|------|-----|-----|--------|--------|--------|
| ATOM | 1542 | CG   | GLU | 99  | 11.618 | 4.458  | 10.537 |
| ATOM | 1543 | HG2  | GLU | 99  | 11.660 | 4.483  | 10.385 |
| ATOM | 1544 | HG3  | GLU | 99  | 11.463 | 4.488  | 10.558 |
| ATOM | 1545 | CD   | GLU | 99  | 12.226 | 5.194  | 11.050 |
| ATOM | 1546 | OE1  | GLU | 99  | 12.428 | 5.456  | 11.323 |
| ATOM | 1547 | OE2  | GLU | 99  | 12.513 | 5.524  | 11.190 |
| ATOM | 1548 | C    | GLU | 99  | 9.278  | 2.250  | 10.772 |
| ATOM | 1549 | O    | GLU | 99  | 8.565  | 2.625  | 11.612 |
| ATOM | 1550 | N    | PHE | 100 | 8.826  | 1.601  | 9.819  |
| ATOM | 1551 | H    | PHE | 100 | 9.455  | 1.311  | 9.162  |
| ATOM | 1552 | CA   | PHE | 100 | 7.467  | 1.252  | 9.697  |
| ATOM | 1553 | HA   | PHE | 100 | 6.878  | 2.082  | 9.924  |
| ATOM | 1554 | CB   | PHE | 100 | 7.207  | 0.850  | 8.306  |
| ATOM | 1555 | HB2  | PHE | 100 | 7.868  | 0.502  | 7.925  |
| ATOM | 1556 | HB3  | PHE | 100 | 6.626  | 0.268  | 8.280  |
| ATOM | 1557 | CG   | PHE | 100 | 6.823  | 1.629  | 7.433  |
| ATOM | 1558 | CD1  | PHE | 100 | 6.629  | 2.015  | 6.932  |
| ATOM | 1559 | HD1  | PHE | 100 | 6.755  | 1.770  | 7.176  |
| ATOM | 1560 | CE1  | PHE | 100 | 6.274  | 2.722  | 6.110  |
| ATOM | 1561 | HE1  | PHE | 100 | 6.134  | 3.015  | 5.733  |
| ATOM | 1562 | CZ   | PHE | 100 | 6.105  | 3.047  | 5.781  |
| ATOM | 1563 | HZ   | PHE | 100 | 5.836  | 3.589  | 5.150  |
| ATOM | 1564 | CE2  | PHE | 100 | 6.295  | 2.668  | 6.277  |
| ATOM | 1565 | HE2  | PHE | 100 | 6.168  | 2.919  | 6.028  |
| ATOM | 1566 | CD2  | PHE | 100 | 6.651  | 1.959  | 7.100  |
| ATOM | 1567 | HD2  | PHE | 100 | 6.795  | 1.672  | 7.475  |
| ATOM | 1568 | C    | PHE | 100 | 7.054  | 0.208  | 10.652 |
| ATOM | 1569 | O    | PHE | 100 | 5.967  | 0.217  | 11.125 |
| ATOM | 1570 | N    | GLN | 101 | 7.922  | -0.657 | 11.002 |
| ATOM | 1571 | H    | GLN | 101 | 8.787  | -0.628 | 10.569 |
| ATOM | 1572 | CA   | GLN | 101 | 7.674  | -1.646 | 11.978 |
| ATOM | 1573 | HA   | GLN | 101 | 6.820  | -2.158 | 11.712 |
| ATOM | 1574 | CB   | GLN | 101 | 8.794  | -2.586 | 11.989 |
| ATOM | 1575 | HB2  | GLN | 101 | 9.371  | -2.448 | 11.790 |
| ATOM | 1576 | HB3  | GLN | 101 | 9.003  | -2.814 | 12.507 |
| ATOM | 1577 | CG   | GLN | 101 | 8.880  | -3.425 | 11.589 |
| ATOM | 1578 | HG2  | GLN | 101 | 8.835  | -3.500 | 11.395 |
| ATOM | 1579 | HG3  | GLN | 101 | 8.994  | -3.388 | 11.574 |
| ATOM | 1580 | CD   | GLN | 101 | 8.906  | -4.239 | 11.462 |
| ATOM | 1581 | OE1  | GLN | 101 | 8.667  | -4.526 | 11.722 |
| ATOM | 1582 | NE2  | GLN | 101 | 9.198  | -4.649 | 11.059 |
| ATOM | 1583 | HE21 | GLN | 101 | 9.220  | -5.186 | 10.977 |
| ATOM | 1584 | HE22 | GLN | 101 | 9.408  | -4.434 | 10.830 |
| ATOM | 1585 | C    | GLN | 101 | 7.402  | -1.097 | 13.331 |
| ATOM | 1586 | O    | GLN | 101 | 6.602  | -1.612 | 14.038 |
| ATOM | 1587 | N    | THR | 102 | 7.993  | -0.022 | 13.675 |
| ATOM | 1588 | H    | THR | 102 | 8.645  | 0.349  | 13.064 |
| ATOM | 1589 | CA   | THR | 102 | 7.742  | 0.646  | 14.905 |
| ATOM | 1590 | HA   | THR | 102 | 7.773  | -0.055 | 15.678 |
| ATOM | 1591 | CB   | THR | 102 | 8.786  | 1.644  | 15.169 |
| ATOM | 1592 | HB   | THR | 102 | 8.638  | 2.295  | 15.059 |
| ATOM | 1593 | CG2  | THR | 102 | 9.258  | 1.801  | 16.080 |
| ATOM | 1594 | HG21 | THR | 102 | 9.389  | 1.824  | 16.298 |
| ATOM | 1595 | HG22 | THR | 102 | 9.378  | 1.865  | 16.292 |
| ATOM | 1596 | HG23 | THR | 102 | 9.358  | 1.842  | 16.321 |
| ATOM | 1597 | OG1  | THR | 102 | 9.575  | 1.613  | 14.723 |
| ATOM | 1598 | HG1  | THR | 102 | 9.950  | 1.693  | 14.343 |
| ATOM | 1599 | C    | THR | 102 | 6.393  | 1.265  | 14.971 |
| ATOM | 1600 | O    | THR | 102 | 5.788  | 1.260  | 15.984 |
| ATOM | 1601 | N    | MET | 103 | 5.867  | 1.720  | 13.895 |
| ATOM | 1602 | H    | MET | 103 | 6.411  | 1.713  | 13.098 |
| ATOM | 1603 | CA   | MET | 103 | 4.528  | 2.209  | 13.820 |
| ATOM | 1604 | HA   | MET | 103 | 4.374  | 2.891  | 14.598 |
| ATOM | 1605 | CB   | MET | 103 | 4.322  | 2.924  | 12.534 |
| ATOM | 1606 | HB2  | MET | 103 | 4.509  | 2.543  | 11.934 |
| ATOM | 1607 | HB3  | MET | 103 | 3.612  | 3.109  | 12.393 |
| ATOM | 1608 | CG   | MET | 103 | 4.791  | 3.925  | 12.235 |
| ATOM | 1609 | HG2  | MET | 103 | 4.615  | 4.310  | 12.771 |
| ATOM | 1610 | HG3  | MET | 103 | 5.446  | 3.789  | 12.362 |
| ATOM | 1611 | SD   | MET | 103 | 4.604  | 4.736  | 10.846 |
| ATOM | 1612 | CE   | MET | 103 | 5.483  | 5.150  | 10.446 |
| ATOM | 1613 | HE1  | MET | 103 | 5.663  | 5.222  | 10.369 |
| ATOM | 1614 | HE2  | MET | 103 | 5.653  | 5.242  | 10.355 |
| ATOM | 1615 | HE3  | MET | 103 | 5.665  | 5.242  | 10.364 |
| ATOM | 1616 | C    | MET | 103 | 3.514  | 1.131  | 14.005 |
| ATOM | 1617 | O    | MET | 103 | 2.541  | 1.319  | 14.630 |
| ATOM | 1618 | N    | LEU | 104 | 3.763  | -0.021 | 13.525 |
| ATOM | 1619 | H    | LEU | 104 | 4.573  | -0.110 | 13.014 |
| ATOM | 1620 | CA   | LEU | 104 | 2.915  | -1.156 | 13.670 |
| ATOM | 1621 | HA   | LEU | 104 | 1.928  | -0.841 | 13.539 |
| ATOM | 1622 | CB   | LEU | 104 | 3.244  | -2.119 | 12.606 |
| ATOM | 1623 | HB2  | LEU | 104 | 3.938  | -2.103 | 12.314 |
| ATOM | 1624 | HB3  | LEU | 104 | 3.204  | -2.792 | 12.841 |
| ATOM | 1625 | CG   | LEU | 104 | 2.726  | -2.239 | 11.614 |
| ATOM | 1626 | HG   | LEU | 104 | 2.917  | -1.931 | 11.727 |
| ATOM | 1627 | CD1  | LEU | 104 | 2.566  | -2.645 | 10.885 |
| ATOM | 1628 | HD11 | LEU | 104 | 2.500  | -2.768 | 10.726 |
| ATOM | 1629 | HD12 | LEU | 104 | 2.505  | -2.722 | 10.638 |
| ATOM | 1630 | HD13 | LEU | 104 | 2.580  | -2.733 | 10.765 |
| ATOM | 1631 | CD2  | LEU | 104 | 2.115  | -2.411 | 11.122 |
| ATOM | 1632 | HD21 | LEU | 104 | 1.974  | -2.476 | 10.999 |
| ATOM | 1633 | HD22 | LEU | 104 | 1.963  | -2.448 | 10.989 |
| ATOM | 1634 | HD23 | LEU | 104 | 1.968  | -2.432 | 11.021 |
| ATOM | 1635 | C    | LEU | 104 | 2.950  | -1.785 | 15.026 |
| ATOM | 1636 | O    | LEU | 104 | 2.055  | -2.460 | 15.389 |
| ATOM | 1637 | N    | GLN | 105 | 3.932  | -1.523 | 15.809 |
| ATOM | 1638 | H    | GLN | 105 | 4.652  | -1.001 | 15.448 |
| ATOM | 1639 | CA   | GLN | 105 | 4.019  | -1.952 | 17.162 |
| ATOM | 1640 | HA   | GLN | 105 | 3.771  | -2.948 | 17.211 |
| ATOM | 1641 | CB   | GLN | 105 | 5.399  | -1.816 | 17.645 |
| ATOM | 1642 | HB2  | GLN | 105 | 5.841  | -1.450 | 17.295 |
| ATOM | 1643 | HB3  | GLN | 105 | 5.513  | -1.533 | 18.231 |
| ATOM | 1644 | CG   | GLN | 105 | 6.058  | -2.555 | 17.824 |
| ATOM | 1645 | HG2  | GLN | 105 | 5.819  | -2.851 | 18.012 |
| ATOM | 1646 | HG3  | GLN | 105 | 6.100  | -2.748 | 17.511 |



|      |      |      |     |     |         |        |        |
|------|------|------|-----|-----|---------|--------|--------|
| ATOM | 1647 | CD   | GLN | 105 | 7.006   | -2.650 | 18.176 |
| ATOM | 1648 | OE1  | GLN | 105 | 7.283   | -2.339 | 18.324 |
| ATOM | 1649 | NE2  | GLN | 105 | 7.542   | -3.079 | 18.325 |
| ATOM | 1650 | HE21 | GLN | 105 | 8.158   | -3.138 | 18.554 |
| ATOM | 1651 | HE22 | GLN | 105 | 7.333   | -3.343 | 18.216 |
| ATOM | 1652 | C    | GLN | 105 | 3.079   | -1.261 | 18.046 |
| ATOM | 1653 | O    | GLN | 105 | 2.760   | -1.743 | 19.044 |
| ATOM | 1654 | N    | HIP | 106 | 2.599   | -0.154 | 17.683 |
| ATOM | 1655 | H    | HIP | 106 | 2.910   | 0.194  | 16.863 |
| ATOM | 1656 | CA   | HIP | 106 | 1.661   | 0.595  | 18.417 |
| ATOM | 1657 | HA   | HIP | 106 | 1.830   | 0.402  | 19.417 |
| ATOM | 1658 | CB   | HIP | 106 | 1.891   | 2.014  | 18.185 |
| ATOM | 1659 | HB2  | HIP | 106 | 1.870   | 2.199  | 17.358 |
| ATOM | 1660 | HB3  | HIP | 106 | 1.266   | 2.537  | 18.517 |
| ATOM | 1661 | CG   | HIP | 106 | 2.935   | 2.535  | 18.601 |
| ATOM | 1662 | ND1  | HIP | 106 | 3.553   | 2.463  | 19.413 |
| ATOM | 1663 | HD1  | HIP | 106 | 3.392   | 2.050  | 19.839 |
| ATOM | 1664 | CE1  | HIP | 106 | 4.411   | 3.049  | 19.536 |
| ATOM | 1665 | HE1  | HIP | 106 | 5.034   | 3.148  | 20.104 |
| ATOM | 1666 | NE2  | HIP | 106 | 4.355   | 3.494  | 18.830 |
| ATOM | 1667 | HE2  | HIP | 106 | 4.891   | 3.972  | 18.748 |
| ATOM | 1668 | CD2  | HIP | 106 | 3.436   | 3.182  | 18.239 |
| ATOM | 1669 | HD2  | HIP | 106 | 3.159   | 3.404  | 17.614 |
| ATOM | 1670 | C    | HIP | 106 | 0.242   | 0.235  | 18.178 |
| ATOM | 1671 | O    | HIP | 106 | -0.604  | 0.716  | 18.757 |
| ATOM | 1672 | N    | LEU | 107 | -0.032  | -0.609 | 17.338 |
| ATOM | 1673 | H    | LEU | 107 | 0.706   | -0.961 | 16.915 |
| ATOM | 1674 | CA   | LEU | 107 | -1.329  | -1.099 | 17.025 |
| ATOM | 1675 | HA   | LEU | 107 | -2.006  | -0.343 | 17.127 |
| ATOM | 1676 | CB   | LEU | 107 | -1.347  | -1.515 | 15.650 |
| ATOM | 1677 | HB2  | LEU | 107 | -1.015  | -1.421 | 15.331 |
| ATOM | 1678 | HB3  | LEU | 107 | -1.331  | -1.931 | 15.596 |
| ATOM | 1679 | CG   | LEU | 107 | -1.812  | -1.523 | 14.754 |
| ATOM | 1680 | HG   | LEU | 107 | -1.816  | -1.721 | 15.081 |
| ATOM | 1681 | CD1  | LEU | 107 | -2.204  | -1.236 | 14.249 |
| ATOM | 1682 | HD11 | LEU | 107 | -2.332  | -1.197 | 14.180 |
| ATOM | 1683 | HD12 | LEU | 107 | -2.288  | -1.089 | 14.079 |
| ATOM | 1684 | HD13 | LEU | 107 | -2.282  | -1.217 | 14.125 |
| ATOM | 1685 | CD2  | LEU | 107 | -1.888  | -1.567 | 13.843 |
| ATOM | 1686 | HD21 | LEU | 107 | -1.968  | -1.541 | 13.635 |
| ATOM | 1687 | HD22 | LEU | 107 | -1.811  | -1.554 | 13.620 |
| ATOM | 1688 | HD23 | LEU | 107 | -1.943  | -1.641 | 13.619 |
| ATOM | 1689 | C    | LEU | 107 | -1.759  | -2.176 | 17.926 |
| ATOM | 1690 | O    | LEU | 107 | -0.983  | -2.938 | 18.323 |
| ATOM | 1691 | N    | GLN | 108 | -3.003  | -2.258 | 18.228 |
| ATOM | 1692 | H    | GLN | 108 | -3.580  | -1.610 | 17.860 |
| ATOM | 1693 | CA   | GLN | 108 | -3.593  | -3.272 | 18.999 |
| ATOM | 1694 | HA   | GLN | 108 | -2.939  | -3.457 | 19.762 |
| ATOM | 1695 | CB   | GLN | 108 | -4.866  | -2.834 | 19.545 |
| ATOM | 1696 | HB2  | GLN | 108 | -5.405  | -2.589 | 19.039 |
| ATOM | 1697 | HB3  | GLN | 108 | -5.283  | -3.373 | 19.918 |
| ATOM | 1698 | CG   | GLN | 108 | -4.894  | -2.011 | 20.276 |
| ATOM | 1699 | HG2  | GLN | 108 | -4.475  | -1.849 | 20.228 |
| ATOM | 1700 | HG3  | GLN | 108 | -5.146  | -1.678 | 20.266 |
| ATOM | 1701 | CD   | GLN | 108 | -5.174  | -1.831 | 21.097 |
| ATOM | 1702 | OE1  | GLN | 108 | -5.283  | -2.109 | 21.298 |
| ATOM | 1703 | NE2  | GLN | 108 | -5.298  | -1.363 | 21.607 |
| ATOM | 1704 | HE21 | GLN | 108 | -5.482  | -1.247 | 22.139 |
| ATOM | 1705 | HE22 | GLN | 108 | -5.216  | -1.124 | 21.463 |
| ATOM | 1706 | C    | GLN | 108 | -3.803  | -4.496 | 18.259 |
| ATOM | 1707 | O    | GLN | 108 | -3.961  | -4.441 | 17.140 |
| ATOM | 1708 | N    | PRO | 109 | -3.839  | -5.605 | 18.842 |
| ATOM | 1709 | CD   | PRO | 109 | -3.578  | -5.816 | 20.137 |
| ATOM | 1710 | HD2  | PRO | 109 | -4.332  | -5.538 | 20.689 |
| ATOM | 1711 | HD3  | PRO | 109 | -2.731  | -5.349 | 20.418 |
| ATOM | 1712 | CG   | PRO | 109 | -3.428  | -7.172 | 20.290 |
| ATOM | 1713 | HG2  | PRO | 109 | -4.046  | -7.491 | 20.811 |
| ATOM | 1714 | HG3  | PRO | 109 | -2.628  | -7.347 | 20.589 |
| ATOM | 1715 | CB   | PRO | 109 | -3.570  | -7.760 | 19.154 |
| ATOM | 1716 | HB2  | PRO | 109 | -2.776  | -8.113 | 18.974 |
| ATOM | 1717 | HB3  | PRO | 109 | -4.201  | -8.403 | 19.227 |
| ATOM | 1718 | CA   | PRO | 109 | -3.938  | -6.808 | 18.203 |
| ATOM | 1719 | HA   | PRO | 109 | -3.242  | -6.802 | 17.488 |
| ATOM | 1720 | C    | PRO | 109 | -5.234  | -7.150 | 17.611 |
| ATOM | 1721 | O    | PRO | 109 | -5.369  | -8.090 | 17.164 |
| ATOM | 1722 | N    | THR | 110 | -6.191  | -6.412 | 17.601 |
| ATOM | 1723 | H    | THR | 110 | -6.018  | -5.647 | 17.952 |
| ATOM | 1724 | CA   | THR | 110 | -7.488  | -6.632 | 17.092 |
| ATOM | 1725 | HA   | THR | 110 | -7.606  | -7.618 | 16.948 |
| ATOM | 1726 | CB   | THR | 110 | -8.500  | -6.229 | 18.010 |
| ATOM | 1727 | HB   | THR | 110 | -9.240  | -6.358 | 17.751 |
| ATOM | 1728 | CG2  | THR | 110 | -8.518  | -6.676 | 19.040 |
| ATOM | 1729 | HG21 | THR | 110 | -8.517  | -6.773 | 19.308 |
| ATOM | 1730 | HG22 | THR | 110 | -8.556  | -6.780 | 19.277 |
| ATOM | 1731 | HG23 | THR | 110 | -8.514  | -6.809 | 19.288 |
| ATOM | 1732 | OG1  | THR | 110 | -8.531  | -5.266 | 18.271 |
| ATOM | 1733 | HG1  | THR | 110 | -9.035  | -5.061 | 18.646 |
| ATOM | 1734 | C    | THR | 110 | -7.718  | -6.000 | 15.824 |
| ATOM | 1735 | O    | THR | 110 | -7.279  | -5.007 | 15.592 |
| ATOM | 1736 | N    | ALA | 111 | -8.419  | -6.564 | 14.990 |
| ATOM | 1737 | H    | ALA | 111 | -8.775  | -7.361 | 15.238 |
| ATOM | 1738 | CA   | ALA | 111 | -8.662  | -6.094 | 13.727 |
| ATOM | 1739 | HA   | ALA | 111 | -7.780  | -5.851 | 13.316 |
| ATOM | 1740 | CB   | ALA | 111 | -9.236  | -7.109 | 12.973 |
| ATOM | 1741 | HB1  | ALA | 111 | -9.323  | -7.347 | 12.750 |
| ATOM | 1742 | HB2  | ALA | 111 | -9.372  | -7.387 | 12.837 |
| ATOM | 1743 | HB3  | ALA | 111 | -9.426  | -7.321 | 12.773 |
| ATOM | 1744 | C    | ALA | 111 | -9.476  | -4.945 | 13.675 |
| ATOM | 1745 | O    | ALA | 111 | -9.259  | -4.154 | 12.931 |
| ATOM | 1746 | N    | GLU | 112 | -10.371 | -4.816 | 14.499 |
| ATOM | 1747 | H    | GLU | 112 | -10.520 | -5.499 | 15.072 |
| ATOM | 1748 | CA   | GLU | 112 | -11.195 | -3.756 | 14.567 |
| ATOM | 1749 | HA   | GLU | 112 | -11.541 | -3.580 | 13.648 |
| ATOM | 1750 | CB   | GLU | 112 | -12.306 | -4.076 | 15.410 |
| ATOM | 1751 | HB2  | GLU | 112 | -12.499 | -4.166 | 15.639 |

|      |      |      |     |     |         |        |        |
|------|------|------|-----|-----|---------|--------|--------|
| ATOM | 1752 | HB3  | GLU | 112 | -12.555 | -4.063 | 15.567 |
| ATOM | 1753 | CG   | GLU | 112 | -12.858 | -4.282 | 15.718 |
| ATOM | 1754 | HG2  | GLU | 112 | -12.722 | -4.065 | 15.657 |
| ATOM | 1755 | HG3  | GLU | 112 | -12.867 | -4.299 | 15.587 |
| ATOM | 1756 | CD   | GLU | 112 | -13.596 | -4.755 | 16.293 |
| ATOM | 1757 | OE1  | GLU | 112 | -13.864 | -4.976 | 16.565 |
| ATOM | 1758 | OE2  | GLU | 112 | -13.913 | -4.912 | 16.479 |
| ATOM | 1759 | C    | GLU | 112 | -10.538 | -2.549 | 14.970 |
| ATOM | 1760 | O    | GLU | 112 | -10.875 | -1.565 | 14.578 |
| ATOM | 1761 | N    | ASN | 113 | -9.568  | -2.610 | 15.705 |
| ATOM | 1762 | H    | ASN | 113 | -9.330  | -3.439 | 16.000 |
| ATOM | 1763 | CA   | ASN | 113 | -8.812  | -1.524 | 16.072 |
| ATOM | 1764 | HA   | ASN | 113 | -9.426  | -0.746 | 16.199 |
| ATOM | 1765 | CB   | ASN | 113 | -8.230  | -1.852 | 17.336 |
| ATOM | 1766 | HB2  | ASN | 113 | -8.897  | -2.225 | 17.983 |
| ATOM | 1767 | HB3  | ASN | 113 | -7.561  | -2.523 | 17.234 |
| ATOM | 1768 | CG   | ASN | 113 | -7.655  | -0.788 | 17.898 |
| ATOM | 1769 | OD1  | ASN | 113 | -6.947  | -0.517 | 17.789 |
| ATOM | 1770 | ND2  | ASN | 113 | -7.942  | -0.158 | 18.527 |
| ATOM | 1771 | HD21 | ASN | 113 | -7.571  | 0.532  | 18.899 |
| ATOM | 1772 | HD22 | ASN | 113 | -8.528  | -0.374 | 18.628 |
| ATOM | 1773 | C    | ASN | 113 | -7.829  | -1.078 | 15.049 |
| ATOM | 1774 | O    | ASN | 113 | -7.540  | 0.064  | 14.943 |
| ATOM | 1775 | N    | ALA | 114 | -7.359  | -1.948 | 14.251 |
| ATOM | 1776 | H    | ALA | 114 | -7.626  | -2.865 | 14.385 |
| ATOM | 1777 | CA   | ALA | 114 | -6.481  | -1.627 | 13.192 |
| ATOM | 1778 | HA   | ALA | 114 | -5.679  | -1.083 | 13.575 |
| ATOM | 1779 | CB   | ALA | 114 | -5.964  | -2.889 | 12.657 |
| ATOM | 1780 | HB1  | ALA | 114 | -5.847  | -3.200 | 12.523 |
| ATOM | 1781 | HB2  | ALA | 114 | -5.834  | -3.179 | 12.517 |
| ATOM | 1782 | HB3  | ALA | 114 | -5.827  | -3.199 | 12.539 |
| ATOM | 1783 | C    | ALA | 114 | -7.093  | -0.765 | 12.128 |
| ATOM | 1784 | O    | ALA | 114 | -6.441  | 0.097  | 11.604 |
| ATOM | 1785 | N    | TYR | 115 | -8.348  | -0.941 | 11.850 |
| ATOM | 1786 | H    | TYR | 115 | -8.818  | -1.679 | 12.285 |
| ATOM | 1787 | CA   | TYR | 115 | -9.075  | -0.116 | 10.938 |
| ATOM | 1788 | HA   | TYR | 115 | -8.535  | -0.038 | 10.037 |
| ATOM | 1789 | CB   | TYR | 115 | -10.391 | -0.766 | 10.658 |
| ATOM | 1790 | HB2  | TYR | 115 | -10.725 | -1.004 | 11.270 |
| ATOM | 1791 | HB3  | TYR | 115 | -10.901 | -0.289 | 10.371 |
| ATOM | 1792 | CG   | TYR | 115 | -10.664 | -1.685 | 9.958  |
| ATOM | 1793 | CD1  | TYR | 115 | -10.238 | -2.043 | 9.211  |
| ATOM | 1794 | HD1  | TYR | 115 | -9.698  | -1.673 | 9.130  |
| ATOM | 1795 | CE1  | TYR | 115 | -10.522 | -2.886 | 8.567  |
| ATOM | 1796 | HE1  | TYR | 115 | -10.201 | -3.161 | 7.998  |
| ATOM | 1797 | CZ   | TYR | 115 | -11.232 | -3.377 | 8.664  |
| ATOM | 1798 | OH   | TYR | 115 | -11.502 | -4.186 | 8.040  |
| ATOM | 1799 | HH   | TYR | 115 | -12.071 | -4.445 | 8.268  |
| ATOM | 1800 | CE2  | TYR | 115 | -11.662 | -3.023 | 9.407  |
| ATOM | 1801 | HE2  | TYR | 115 | -12.208 | -3.395 | 9.482  |
| ATOM | 1802 | CD2  | TYR | 115 | -11.379 | -2.179 | 10.048 |
| ATOM | 1803 | HD2  | TYR | 115 | -11.715 | -1.910 | 10.608 |
| ATOM | 1804 | C    | TYR | 115 | -9.250  | 1.292  | 11.433 |
| ATOM | 1805 | O    | TYR | 115 | -9.127  | 2.224  | 10.684 |
| ATOM | 1806 | N    | GLU | 116 | -9.476  | 1.468  | 12.699 |
| ATOM | 1807 | H    | GLU | 116 | -9.581  | 0.674  | 13.260 |
| ATOM | 1808 | CA   | GLU | 116 | -9.567  | 2.765  | 13.313 |
| ATOM | 1809 | HA   | GLU | 116 | -10.230 | 3.363  | 12.748 |
| ATOM | 1810 | CB   | GLU | 116 | -10.137 | 2.611  | 14.692 |
| ATOM | 1811 | HB2  | GLU | 116 | -10.633 | 2.112  | 14.823 |
| ATOM | 1812 | HB3  | GLU | 116 | -9.706  | 2.440  | 15.202 |
| ATOM | 1813 | CG   | GLU | 116 | -10.639 | 3.352  | 15.219 |
| ATOM | 1814 | HG2  | GLU | 116 | -10.196 | 3.615  | 15.188 |
| ATOM | 1815 | HG3  | GLU | 116 | -10.969 | 3.613  | 14.938 |
| ATOM | 1816 | CD   | GLU | 116 | -11.288 | 3.382  | 16.177 |
| ATOM | 1817 | OE1  | GLU | 116 | -11.484 | 3.399  | 16.588 |
| ATOM | 1818 | OE2  | GLU | 116 | -11.608 | 3.403  | 16.529 |
| ATOM | 1819 | C    | GLU | 116 | -8.241  | 3.497  | 13.325 |
| ATOM | 1820 | O    | GLU | 116 | -8.177  | 4.648  | 13.003 |
| ATOM | 1821 | N    | TYR | 117 | -7.168  | 2.825  | 13.618 |
| ATOM | 1822 | H    | TYR | 117 | -7.284  | 1.891  | 13.891 |
| ATOM | 1823 | CA   | TYR | 117 | -5.830  | 3.381  | 13.596 |
| ATOM | 1824 | HA   | TYR | 117 | -5.817  | 4.259  | 14.199 |
| ATOM | 1825 | CB   | TYR | 117 | -4.877  | 2.391  | 14.205 |
| ATOM | 1826 | HB2  | TYR | 117 | -5.274  | 2.042  | 15.103 |
| ATOM | 1827 | HB3  | TYR | 117 | -4.794  | 1.566  | 13.586 |
| ATOM | 1828 | CG   | TYR | 117 | -3.537  | 2.910  | 14.486 |
| ATOM | 1829 | CD1  | TYR | 117 | -3.261  | 3.495  | 15.584 |
| ATOM | 1830 | HD1  | TYR | 117 | -3.997  | 3.582  | 16.213 |
| ATOM | 1831 | CE1  | TYR | 117 | -2.027  | 3.969  | 15.868 |
| ATOM | 1832 | HE1  | TYR | 117 | -1.824  | 4.413  | 16.709 |
| ATOM | 1833 | CZ   | TYR | 117 | -1.058  | 3.859  | 15.052 |
| ATOM | 1834 | OH   | TYR | 117 | 0.130   | 4.311  | 15.324 |
| ATOM | 1835 | HH   | TYR | 117 | 0.204   | 4.673  | 16.049 |
| ATOM | 1836 | CE2  | TYR | 117 | -1.329  | 3.274  | 13.950 |
| ATOM | 1837 | HE2  | TYR | 117 | -0.583  | 3.195  | 13.336 |
| ATOM | 1838 | CD2  | TYR | 117 | -2.567  | 2.803  | 13.666 |
| ATOM | 1839 | HD2  | TYR | 117 | -2.771  | 2.361  | 12.823 |
| ATOM | 1840 | C    | TYR | 117 | -5.398  | 3.794  | 12.206 |
| ATOM | 1841 | O    | TYR | 117 | -4.876  | 4.872  | 12.018 |
| ATOM | 1842 | N    | PHE | 118 | -5.678  | 2.984  | 11.216 |
| ATOM | 1843 | H    | PHE | 118 | -6.101  | 2.116  | 11.430 |
| ATOM | 1844 | CA   | PHE | 118 | -5.405  | 3.302  | 9.836  |
| ATOM | 1845 | HA   | PHE | 118 | -4.361  | 3.516  | 9.732  |
| ATOM | 1846 | CB   | PHE | 118 | -5.734  | 2.106  | 8.982  |
| ATOM | 1847 | HB2  | PHE | 118 | -5.234  | 1.285  | 9.362  |
| ATOM | 1848 | HB3  | PHE | 118 | -6.752  | 1.892  | 9.060  |
| ATOM | 1849 | CG   | PHE | 118 | -5.387  | 2.218  | 7.559  |
| ATOM | 1850 | CD1  | PHE | 118 | -4.917  | 2.240  | 6.959  |
| ATOM | 1851 | HD1  | PHE | 118 | -4.800  | 2.197  | 7.503  |
| ATOM | 1852 | CE1  | PHE | 118 | -4.596  | 2.319  | 5.649  |
| ATOM | 1853 | HE1  | PHE | 118 | -4.238  | 2.340  | 5.200  |
| ATOM | 1854 | CZ   | PHE | 118 | -4.744  | 2.375  | 4.930  |
| ATOM | 1855 | HZ   | PHE | 118 | -4.499  | 2.439  | 3.929  |
| ATOM | 1856 | CE2  | PHE | 118 | -5.209  | 2.353  | 5.521  |

|      |      |      |     |     |         |        |        |
|------|------|------|-----|-----|---------|--------|--------|
| ATOM | 1857 | HE2  | PHE | 118 | -5.320  | 2.400  | 4.973  |
| ATOM | 1858 | CD2  | PHE | 118 | -5.529  | 2.276  | 6.831  |
| ATOM | 1859 | HD2  | PHE | 118 | -5.885  | 2.261  | 7.275  |
| ATOM | 1860 | C    | PHE | 118 | -6.143  | 4.532  | 9.390  |
| ATOM | 1861 | O    | PHE | 118 | -5.556  | 5.403  | 8.794  |
| ATOM | 1862 | N    | THR | 119 | -7.400  | 4.657  | 9.742  |
| ATOM | 1863 | H    | THR | 119 | -7.822  | 3.922  | 10.248 |
| ATOM | 1864 | CA   | THR | 119 | -8.193  | 5.818  | 9.424  |
| ATOM | 1865 | HA   | THR | 119 | -8.142  | 5.979  | 8.381  |
| ATOM | 1866 | CB   | THR | 119 | -9.641  | 5.601  | 9.789  |
| ATOM | 1867 | HB   | THR | 119 | -9.787  | 5.744  | 10.539 |
| ATOM | 1868 | CG2  | THR | 119 | -10.460 | 6.195  | 9.249  |
| ATOM | 1869 | HG21 | THR | 119 | -10.658 | 6.338  | 9.125  |
| ATOM | 1870 | HG22 | THR | 119 | -10.649 | 6.336  | 9.138  |
| ATOM | 1871 | HG23 | THR | 119 | -10.687 | 6.346  | 9.101  |
| ATOM | 1872 | OG1  | THR | 119 | -10.113 | 4.626  | 9.659  |
| ATOM | 1873 | HG1  | THR | 119 | -9.961  | 3.998  | 10.014 |
| ATOM | 1874 | C    | THR | 119 | -7.663  | 7.071  | 10.065 |
| ATOM | 1875 | O    | THR | 119 | -7.628  | 8.088  | 9.445  |
| ATOM | 1876 | N    | LYS | 120 | -7.180  | 7.008  | 11.266 |
| ATOM | 1877 | H    | LYS | 120 | -7.247  | 6.149  | 11.721 |
| ATOM | 1878 | CA   | LYS | 120 | -6.589  | 8.128  | 11.965 |
| ATOM | 1879 | HA   | LYS | 120 | -7.250  | 8.952  | 11.899 |
| ATOM | 1880 | CB   | LYS | 120 | -6.420  | 7.786  | 13.413 |
| ATOM | 1881 | HB2  | LYS | 120 | -6.264  | 7.036  | 13.525 |
| ATOM | 1882 | HB3  | LYS | 120 | -5.815  | 8.157  | 13.793 |
| ATOM | 1883 | CG   | LYS | 120 | -7.276  | 7.980  | 14.215 |
| ATOM | 1884 | HG2  | LYS | 120 | -7.397  | 8.691  | 14.186 |
| ATOM | 1885 | HG3  | LYS | 120 | -7.849  | 7.664  | 13.842 |
| ATOM | 1886 | CD   | LYS | 120 | -7.191  | 7.649  | 15.566 |
| ATOM | 1887 | HD2  | LYS | 120 | -7.043  | 7.208  | 15.668 |
| ATOM | 1888 | HD3  | LYS | 120 | -6.875  | 7.873  | 15.904 |
| ATOM | 1889 | CE   | LYS | 120 | -7.751  | 7.622  | 16.314 |
| ATOM | 1890 | HE2  | LYS | 120 | -7.958  | 7.920  | 16.189 |
| ATOM | 1891 | HE3  | LYS | 120 | -7.963  | 7.405  | 16.097 |
| ATOM | 1892 | NZ   | LYS | 120 | -7.734  | 7.491  | 17.472 |
| ATOM | 1893 | HZ1  | LYS | 120 | -7.749  | 7.446  | 17.772 |
| ATOM | 1894 | HZ2  | LYS | 120 | -7.712  | 7.459  | 17.739 |
| ATOM | 1895 | HZ3  | LYS | 120 | -7.727  | 7.473  | 17.759 |
| ATOM | 1896 | C    | LYS | 120 | -5.295  | 8.607  | 11.350 |
| ATOM | 1897 | O    | LYS | 120 | -5.117  | 9.729  | 11.148 |
| ATOM | 1898 | N    | ILE | 121 | -4.416  | 7.781  | 10.996 |
| ATOM | 1899 | H    | ILE | 121 | -4.613  | 6.867  | 11.190 |
| ATOM | 1900 | CA   | ILE | 121 | -3.146  | 8.183  | 10.408 |
| ATOM | 1901 | HA   | ILE | 121 | -2.840  | 9.087  | 10.882 |
| ATOM | 1902 | CB   | ILE | 121 | -2.048  | 7.186  | 10.682 |
| ATOM | 1903 | HB   | ILE | 121 | -1.258  | 7.540  | 10.344 |
| ATOM | 1904 | CG2  | ILE | 121 | -1.815  | 7.006  | 11.969 |
| ATOM | 1905 | HG21 | ILE | 121 | -1.705  | 6.995  | 12.280 |
| ATOM | 1906 | HG22 | ILE | 121 | -1.794  | 6.982  | 12.306 |
| ATOM | 1907 | HG23 | ILE | 121 | -1.755  | 6.915  | 12.271 |
| ATOM | 1908 | CG1  | ILE | 121 | -2.148  | 5.967  | 10.135 |
| ATOM | 1909 | HG12 | ILE | 121 | -2.639  | 5.495  | 10.497 |
| ATOM | 1910 | HG13 | ILE | 121 | -2.462  | 6.035  | 9.451  |
| ATOM | 1911 | CD1  | ILE | 121 | -1.171  | 5.250  | 9.995  |
| ATOM | 1912 | HD11 | ILE | 121 | -0.951  | 5.072  | 9.956  |
| ATOM | 1913 | HD12 | ILE | 121 | -0.930  | 5.073  | 9.958  |
| ATOM | 1914 | HD13 | ILE | 121 | -0.934  | 5.067  | 9.958  |
| ATOM | 1915 | C    | ILE | 121 | -3.253  | 8.550  | 8.953  |
| ATOM | 1916 | O    | ILE | 121 | -2.546  | 9.411  | 8.501  |
| ATOM | 1917 | N    | ALA | 122 | -4.167  | 7.971  | 8.226  |
| ATOM | 1918 | H    | ALA | 122 | -4.704  | 7.251  | 8.631  |
| ATOM | 1919 | CA   | ALA | 122 | -4.393  | 8.281  | 6.839  |
| ATOM | 1920 | HA   | ALA | 122 | -3.451  | 8.374  | 6.357  |
| ATOM | 1921 | CB   | ALA | 122 | -5.119  | 7.131  | 6.209  |
| ATOM | 1922 | HB1  | ALA | 122 | -5.270  | 6.853  | 6.023  |
| ATOM | 1923 | HB2  | ALA | 122 | -5.285  | 6.833  | 6.084  |
| ATOM | 1924 | HB3  | ALA | 122 | -5.322  | 6.877  | 6.051  |
| ATOM | 1925 | C    | ALA | 122 | -5.111  | 9.590  | 6.619  |
| ATOM | 1926 | O    | ALA | 122 | -4.938  | 10.204 | 5.628  |
| ATOM | 1927 | N    | THR | 123 | -5.871  | 10.061 | 7.548  |
| ATOM | 1928 | H    | THR | 123 | -6.006  | 9.510  | 8.326  |
| ATOM | 1929 | CA   | THR | 123 | -6.487  | 11.366 | 7.512  |
| ATOM | 1930 | HA   | THR | 123 | -6.887  | 11.509 | 6.559  |
| ATOM | 1931 | CB   | THR | 123 | -7.612  | 11.475 | 8.477  |
| ATOM | 1932 | HB   | THR | 123 | -7.514  | 11.711 | 9.171  |
| ATOM | 1933 | CG2  | THR | 123 | -8.445  | 12.057 | 8.313  |
| ATOM | 1934 | HG21 | THR | 123 | -8.632  | 12.223 | 8.249  |
| ATOM | 1935 | HG22 | THR | 123 | -8.645  | 12.170 | 8.265  |
| ATOM | 1936 | HG23 | THR | 123 | -8.674  | 12.209 | 8.317  |
| ATOM | 1937 | OG1  | THR | 123 | -8.082  | 10.711 | 8.661  |
| ATOM | 1938 | HG1  | THR | 123 | -7.984  | 10.053 | 8.970  |
| ATOM | 1939 | C    | THR | 123 | -5.506  | 12.467 | 7.733  |
| ATOM | 1940 | O    | THR | 123 | -5.557  | 13.410 | 7.161  |
| ATOM | 1941 | N    | SER | 124 | -4.560  | 12.325 | 8.505  |
| ATOM | 1942 | H    | SER | 124 | -4.586  | 11.544 | 8.966  |
| ATOM | 1943 | CA   | SER | 124 | -3.516  | 13.267 | 8.772  |
| ATOM | 1944 | HA   | SER | 124 | -3.937  | 14.233 | 8.760  |
| ATOM | 1945 | CB   | SER | 124 | -2.986  | 13.046 | 10.131 |
| ATOM | 1946 | HB2  | SER | 124 | -2.616  | 12.399 | 10.167 |
| ATOM | 1947 | HB3  | SER | 124 | -2.468  | 13.575 | 10.437 |
| ATOM | 1948 | OG   | SER | 124 | -3.632  | 12.999 | 10.960 |
| ATOM | 1949 | HG   | SER | 124 | -3.630  | 12.811 | 11.428 |
| ATOM | 1950 | C    | SER | 124 | -2.385  | 13.255 | 7.760  |
| ATOM | 1951 | O    | SER | 124 | -1.609  | 14.101 | 7.738  |
| ATOM | 1952 | N    | LEU | 125 | -2.296  | 12.328 | 6.891  |
| ATOM | 1953 | H    | LEU | 125 | -2.928  | 11.649 | 6.993  |
| ATOM | 1954 | CA   | LEU | 125 | -1.312  | 12.207 | 5.830  |
| ATOM | 1955 | HA   | LEU | 125 | -0.350  | 12.445 | 6.235  |
| ATOM | 1956 | CB   | LEU | 125 | -1.297  | 10.754 | 5.380  |
| ATOM | 1957 | HB2  | LEU | 125 | -1.096  | 10.148 | 6.223  |
| ATOM | 1958 | HB3  | LEU | 125 | -2.263  | 10.508 | 5.035  |
| ATOM | 1959 | CG   | LEU | 125 | -0.324  | 10.375 | 4.298  |
| ATOM | 1960 | HG   | LEU | 125 | -0.547  | 10.922 | 3.428  |
| ATOM | 1961 | CD1  | LEU | 125 | 1.083   | 10.633 | 4.672  |

|      |      |      |     |     |        |        |        |
|------|------|------|-----|-----|--------|--------|--------|
| ATOM | 1962 | HD11 | LEU | 125 | 1.409  | 10.711 | 4.787  |
| ATOM | 1963 | HD12 | LEU | 125 | 1.434  | 10.721 | 4.734  |
| ATOM | 1964 | HD13 | LEU | 125 | 1.430  | 10.667 | 4.755  |
| ATOM | 1965 | CD2  | LEU | 125 | -0.452 | 8.921  | 3.983  |
| ATOM | 1966 | HD21 | LEU | 125 | -0.502 | 8.578  | 3.888  |
| ATOM | 1967 | HD22 | LEU | 125 | -0.463 | 8.568  | 3.897  |
| ATOM | 1968 | HD23 | LEU | 125 | -0.494 | 8.563  | 3.923  |
| ATOM | 1969 | C    | LEU | 125 | -1.562 | 13.162 | 4.671  |
| ATOM | 1970 | O    | LEU | 125 | -0.634 | 13.627 | 4.074  |
| ATOM | 1971 | N    | PHE | 126 | -2.794 | 13.483 | 4.375  |
| ATOM | 1972 | H    | PHE | 126 | -3.500 | 13.069 | 4.909  |
| ATOM | 1973 | CA   | PHE | 126 | -3.195 | 14.295 | 3.240  |
| ATOM | 1974 | HA   | PHE | 126 | -2.334 | 14.511 | 2.651  |
| ATOM | 1975 | CB   | PHE | 126 | -4.131 | 13.505 | 2.367  |
| ATOM | 1976 | HB2  | PHE | 126 | -4.993 | 13.331 | 2.860  |
| ATOM | 1977 | HB3  | PHE | 126 | -4.366 | 14.060 | 1.568  |
| ATOM | 1978 | CG   | PHE | 126 | -3.652 | 12.247 | 1.870  |
| ATOM | 1979 | CD1  | PHE | 126 | -2.750 | 12.183 | 1.007  |
| ATOM | 1980 | HD1  | PHE | 126 | -2.399 | 13.028 | 0.703  |
| ATOM | 1981 | CE1  | PHE | 126 | -2.312 | 11.021 | 0.541  |
| ATOM | 1982 | HE1  | PHE | 126 | -1.632 | 10.975 | -0.128 |
| ATOM | 1983 | CZ   | PHE | 126 | -2.758 | 9.919  | 0.951  |
| ATOM | 1984 | HZ   | PHE | 126 | -2.415 | 9.032  | 0.603  |
| ATOM | 1985 | CE2  | PHE | 126 | -3.651 | 9.979  | 1.822  |
| ATOM | 1986 | HE2  | PHE | 126 | -3.992 | 9.140  | 2.145  |
| ATOM | 1987 | CD2  | PHE | 126 | -4.101 | 11.139 | 2.272  |
| ATOM | 1988 | HD2  | PHE | 126 | -4.787 | 11.178 | 2.935  |
| ATOM | 1989 | C    | PHE | 126 | -3.768 | 15.645 | 3.610  |
| ATOM | 1990 | O    | PHE | 126 | -4.177 | 16.356 | 2.804  |
| ATOM | 1991 | N    | GLU | 127 | -3.784 | 16.029 | 4.817  |
| ATOM | 1992 | H    | GLU | 127 | -3.444 | 15.413 | 5.432  |
| ATOM | 1993 | CA   | GLU | 127 | -4.333 | 17.271 | 5.304  |
| ATOM | 1994 | HA   | GLU | 127 | -5.268 | 17.358 | 4.933  |
| ATOM | 1995 | CB   | GLU | 127 | -4.443 | 17.243 | 6.752  |
| ATOM | 1996 | HB2  | GLU | 127 | -4.450 | 17.063 | 7.152  |
| ATOM | 1997 | HB3  | GLU | 127 | -4.329 | 17.348 | 7.082  |
| ATOM | 1998 | CG   | GLU | 127 | -4.716 | 17.312 | 7.262  |
| ATOM | 1999 | HG2  | GLU | 127 | -4.502 | 17.254 | 7.432  |
| ATOM | 2000 | HG3  | GLU | 127 | -4.873 | 17.309 | 7.278  |
| ATOM | 2001 | CD   | GLU | 127 | -5.060 | 17.455 | 7.553  |
| ATOM | 2002 | OE1  | GLU | 127 | -5.161 | 17.461 | 7.616  |
| ATOM | 2003 | OE2  | GLU | 127 | -5.234 | 17.569 | 7.718  |
| ATOM | 2004 | C    | GLU | 127 | -3.630 | 18.487 | 4.872  |
| ATOM | 2005 | O    | GLU | 127 | -4.179 | 19.496 | 4.754  |
| ATOM | 2006 | N    | SER | 128 | -2.431 | 18.386 | 4.585  |
| ATOM | 2007 | H    | SER | 128 | -2.034 | 17.546 | 4.746  |
| ATOM | 2008 | CA   | SER | 128 | -1.636 | 19.412 | 4.055  |
| ATOM | 2009 | HA   | SER | 128 | -2.138 | 20.294 | 4.180  |
| ATOM | 2010 | CB   | SER | 128 | -0.446 | 19.518 | 4.821  |
| ATOM | 2011 | HB2  | SER | 128 | 0.123  | 20.107 | 4.489  |
| ATOM | 2012 | HB3  | SER | 128 | -0.609 | 19.779 | 5.654  |
| ATOM | 2013 | OG   | SER | 128 | 0.136  | 18.548 | 4.906  |
| ATOM | 2014 | HG   | SER | 128 | 0.260  | 18.349 | 5.443  |
| ATOM | 2015 | C    | SER | 128 | -1.321 | 19.301 | 2.603  |
| ATOM | 2016 | O    | SER | 128 | -0.668 | 20.003 | 2.090  |
| ATOM | 2017 | N    | GLY | 129 | -1.775 | 18.426 | 1.930  |
| ATOM | 2018 | H    | GLY | 129 | -2.309 | 17.885 | 2.405  |
| ATOM | 2019 | CA   | GLY | 129 | -1.579 | 18.200 | 0.541  |
| ATOM | 2020 | HA2  | GLY | 129 | -2.371 | 18.591 | 0.052  |
| ATOM | 2021 | HA3  | GLY | 129 | -0.758 | 18.697 | 0.233  |
| ATOM | 2022 | C    | GLY | 129 | -1.422 | 16.781 | 0.108  |
| ATOM | 2023 | O    | GLY | 129 | -1.187 | 15.931 | 0.880  |
| ATOM | 2024 | N    | ILE | 130 | -1.543 | 16.524 | -1.146 |
| ATOM | 2025 | H    | ILE | 130 | -1.708 | 17.274 | -1.715 |
| ATOM | 2026 | CA   | ILE | 130 | -1.424 | 15.225 | -1.775 |
| ATOM | 2027 | HA   | ILE | 130 | -1.125 | 14.527 | -1.025 |
| ATOM | 2028 | CB   | ILE | 130 | -2.772 | 14.750 | -2.284 |
| ATOM | 2029 | HB   | ILE | 130 | -3.393 | 14.736 | -1.518 |
| ATOM | 2030 | CG2  | ILE | 130 | -3.346 | 15.600 | -3.225 |
| ATOM | 2031 | HG21 | ILE | 130 | -3.447 | 15.822 | -3.482 |
| ATOM | 2032 | HG22 | ILE | 130 | -3.517 | 15.775 | -3.472 |
| ATOM | 2033 | HG23 | ILE | 130 | -3.516 | 15.830 | -3.412 |
| ATOM | 2034 | CG1  | ILE | 130 | -2.774 | 13.422 | -2.805 |
| ATOM | 2035 | HG12 | ILE | 130 | -2.548 | 13.392 | -3.605 |
| ATOM | 2036 | HG13 | ILE | 130 | -2.183 | 12.982 | -2.396 |
| ATOM | 2037 | CD1  | ILE | 130 | -3.866 | 12.674 | -2.799 |
| ATOM | 2038 | HD11 | ILE | 130 | -4.127 | 12.470 | -2.802 |
| ATOM | 2039 | HD12 | ILE | 130 | -4.129 | 12.483 | -2.786 |
| ATOM | 2040 | HD13 | ILE | 130 | -4.128 | 12.507 | -2.809 |
| ATOM | 2041 | C    | ILE | 130 | -0.338 | 15.218 | -2.832 |
| ATOM | 2042 | O    | ILE | 130 | -0.233 | 16.113 | -3.631 |
| ATOM | 2043 | N    | ASN | 131 | 0.477  | 14.192 | -2.830 |
| ATOM | 2044 | H    | ASN | 131 | 0.323  | 13.493 | -2.160 |
| ATOM | 2045 | CA   | ASN | 131 | 1.485  | 13.900 | -3.828 |
| ATOM | 2046 | HA   | ASN | 131 | 1.147  | 14.277 | -4.777 |
| ATOM | 2047 | CB   | ASN | 131 | 2.782  | 14.625 | -3.476 |
| ATOM | 2048 | HB2  | ASN | 131 | 3.451  | 14.532 | -4.274 |
| ATOM | 2049 | HB3  | ASN | 131 | 2.586  | 15.647 | -3.370 |
| ATOM | 2050 | CG   | ASN | 131 | 3.492  | 14.153 | -2.260 |
| ATOM | 2051 | OD1  | ASN | 131 | 3.780  | 13.029 | -2.067 |
| ATOM | 2052 | ND2  | ASN | 131 | 3.802  | 14.993 | -1.412 |
| ATOM | 2053 | HD21 | ASN | 131 | 4.337  | 14.728 | -0.638 |
| ATOM | 2054 | HD22 | ASN | 131 | 3.569  | 15.912 | -1.568 |
| ATOM | 2055 | C    | ASN | 131 | 1.658  | 12.386 | -3.985 |
| ATOM | 2056 | O    | ASN | 131 | 1.203  | 11.619 | -3.150 |
| ATOM | 2057 | N    | TRP | 132 | 2.320  | 11.953 | -5.045 |
| ATOM | 2058 | H    | TRP | 132 | 2.675  | 12.628 | -5.678 |
| ATOM | 2059 | CA   | TRP | 132 | 2.498  | 10.544 | -5.376 |
| ATOM | 2060 | HA   | TRP | 132 | 1.528  | 10.086 | -5.435 |
| ATOM | 2061 | CB   | TRP | 132 | 3.150  | 10.446 | -6.742 |
| ATOM | 2062 | HB2  | TRP | 132 | 2.568  | 10.936 | -7.437 |
| ATOM | 2063 | HB3  | TRP | 132 | 4.050  | 10.940 | -6.725 |
| ATOM | 2064 | CG   | TRP | 132 | 3.393  | 9.134  | -7.269 |
| ATOM | 2065 | CD1  | TRP | 132 | 4.517  | 8.675  | -7.573 |
| ATOM | 2066 | HD1  | TRP | 132 | 5.368  | 9.193  | -7.464 |

|      |      |      |     |     |        |        |        |
|------|------|------|-----|-----|--------|--------|--------|
| ATOM | 2067 | NE1  | TRP | 132 | 4.408  | 7.456  | -8.056 |
| ATOM | 2068 | HE1  | TRP | 132 | 5.127  | 6.942  | -8.354 |
| ATOM | 2069 | CE2  | TRP | 132 | 3.194  | 7.068  | -8.101 |
| ATOM | 2070 | CZ2  | TRP | 132 | 2.620  | 5.948  | -8.523 |
| ATOM | 2071 | HZ2  | TRP | 132 | 3.163  | 5.185  | -8.899 |
| ATOM | 2072 | CH2  | TRP | 132 | 1.329  | 5.846  | -8.451 |
| ATOM | 2073 | HH2  | TRP | 132 | 0.873  | 5.000  | -8.781 |
| ATOM | 2074 | CZ3  | TRP | 132 | 0.634  | 6.853  | -7.952 |
| ATOM | 2075 | HZ3  | TRP | 132 | -0.354 | 6.765  | -7.898 |
| ATOM | 2076 | CE3  | TRP | 132 | 1.220  | 7.975  | -7.533 |
| ATOM | 2077 | HE3  | TRP | 132 | 0.675  | 8.742  | -7.162 |
| ATOM | 2078 | CD2  | TRP | 132 | 2.517  | 8.116  | -7.596 |
| ATOM | 2079 | C    | TRP | 132 | 3.276  | 9.766  | -4.320 |
| ATOM | 2080 | O    | TRP | 132 | 2.903  | 8.661  | -3.988 |
| ATOM | 2081 | N    | GLY | 133 | 4.294  | 10.356 | -3.718 |
| ATOM | 2082 | H    | GLY | 133 | 4.533  | 11.271 | -4.002 |
| ATOM | 2083 | CA   | GLY | 133 | 5.057  | 9.737  | -2.649 |
| ATOM | 2084 | HA2  | GLY | 133 | 5.492  | 8.829  | -3.006 |
| ATOM | 2085 | HA3  | GLY | 133 | 5.846  | 10.399 | -2.366 |
| ATOM | 2086 | C    | GLY | 133 | 4.238  | 9.421  | -1.405 |
| ATOM | 2087 | O    | GLY | 133 | 4.354  | 8.340  | -0.862 |
| ATOM | 2088 | N    | ARG | 134 | 3.332  | 10.304 | -1.002 |
| ATOM | 2089 | H    | ARG | 134 | 3.301  | 11.170 | -1.486 |
| ATOM | 2090 | CA   | ARG | 134 | 2.373  | 10.059 | 0.085  |
| ATOM | 2091 | HA   | ARG | 134 | 2.910  | 9.702  | 0.950  |
| ATOM | 2092 | CB   | ARG | 134 | 1.656  | 11.354 | 0.468  |
| ATOM | 2093 | HB2  | ARG | 134 | 1.226  | 11.791 | -0.409 |
| ATOM | 2094 | HB3  | ARG | 134 | 0.861  | 11.117 | 1.146  |
| ATOM | 2095 | CG   | ARG | 134 | 2.549  | 12.379 | 1.149  |
| ATOM | 2096 | HG2  | ARG | 134 | 2.913  | 11.981 | 2.054  |
| ATOM | 2097 | HG3  | ARG | 134 | 3.377  | 12.604 | 0.531  |
| ATOM | 2098 | CD   | ARG | 134 | 1.803  | 13.649 | 1.448  |
| ATOM | 2099 | HD2  | ARG | 134 | 1.371  | 13.998 | 0.569  |
| ATOM | 2100 | HD3  | ARG | 134 | 1.040  | 13.435 | 2.122  |
| ATOM | 2101 | NE   | ARG | 134 | 2.653  | 14.683 | 1.978  |
| ATOM | 2102 | HE   | ARG | 134 | 3.589  | 14.647 | 1.760  |
| ATOM | 2103 | CZ   | ARG | 134 | 2.327  | 15.728 | 2.630  |
| ATOM | 2104 | NH1  | ARG | 134 | 1.163  | 15.986 | 2.938  |
| ATOM | 2105 | HH11 | ARG | 134 | 0.467  | 15.394 | 2.662  |
| ATOM | 2106 | HH12 | ARG | 134 | 0.976  | 16.785 | 3.446  |
| ATOM | 2107 | NH2  | ARG | 134 | 3.194  | 16.552 | 3.003  |
| ATOM | 2108 | HH21 | ARG | 134 | 4.107  | 16.377 | 2.797  |
| ATOM | 2109 | HH22 | ARG | 134 | 2.966  | 17.365 | 3.457  |
| ATOM | 2110 | C    | ARG | 134 | 1.377  | 8.951  | -0.250 |
| ATOM | 2111 | O    | ARG | 134 | 1.031  | 8.183  | 0.623  |
| ATOM | 2112 | N    | VAL | 135 | 0.958  | 8.813  | -1.499 |
| ATOM | 2113 | H    | VAL | 135 | 1.288  | 9.467  | -2.167 |
| ATOM | 2114 | CA   | VAL | 135 | 0.076  | 7.724  | -1.944 |
| ATOM | 2115 | HA   | VAL | 135 | -0.734 | 7.639  | -1.240 |
| ATOM | 2116 | CB   | VAL | 135 | -0.541 | 8.019  | -3.313 |
| ATOM | 2117 | HB   | VAL | 135 | 0.200  | 8.173  | -3.993 |
| ATOM | 2118 | CG1  | VAL | 135 | -1.379 | 6.948  | -3.819 |
| ATOM | 2119 | HG11 | VAL | 135 | -1.511 | 6.642  | -3.924 |
| ATOM | 2120 | HG12 | VAL | 135 | -1.651 | 6.705  | -3.906 |
| ATOM | 2121 | HG13 | VAL | 135 | -1.580 | 6.713  | -4.019 |
| ATOM | 2122 | CG2  | VAL | 135 | -1.384 | 9.209  | -3.313 |
| ATOM | 2123 | HG21 | VAL | 135 | -1.595 | 9.505  | -3.310 |
| ATOM | 2124 | HG22 | VAL | 135 | -1.572 | 9.503  | -3.304 |
| ATOM | 2125 | HG23 | VAL | 135 | -1.597 | 9.502  | -3.339 |
| ATOM | 2126 | C    | VAL | 135 | 0.787  | 6.378  | -1.923 |
| ATOM | 2127 | O    | VAL | 135 | 0.240  | 5.419  | -1.410 |
| ATOM | 2128 | N    | VAL | 136 | 2.021  | 6.292  | -2.397 |
| ATOM | 2129 | H    | VAL | 136 | 2.419  | 7.095  | -2.827 |
| ATOM | 2130 | CA   | VAL | 136 | 2.802  | 5.049  | -2.367 |
| ATOM | 2131 | HA   | VAL | 136 | 2.165  | 4.250  | -2.707 |
| ATOM | 2132 | CB   | VAL | 136 | 3.983  | 5.110  | -3.333 |
| ATOM | 2133 | HB   | VAL | 136 | 4.563  | 5.710  | -3.088 |
| ATOM | 2134 | CG1  | VAL | 136 | 4.654  | 4.045  | -3.491 |
| ATOM | 2135 | HG11 | VAL | 136 | 4.711  | 3.742  | -3.519 |
| ATOM | 2136 | HG12 | VAL | 136 | 4.895  | 3.831  | -3.629 |
| ATOM | 2137 | HG13 | VAL | 136 | 4.868  | 3.786  | -3.439 |
| ATOM | 2138 | CG2  | VAL | 136 | 3.737  | 5.397  | -4.557 |
| ATOM | 2139 | HG21 | VAL | 136 | 3.737  | 5.502  | -4.883 |
| ATOM | 2140 | HG22 | VAL | 136 | 3.680  | 5.418  | -4.875 |
| ATOM | 2141 | HG23 | VAL | 136 | 3.621  | 5.489  | -4.824 |
| ATOM | 2142 | C    | VAL | 136 | 3.222  | 4.669  | -0.950 |
| ATOM | 2143 | O    | VAL | 136 | 3.235  | 3.497  | -0.622 |
| ATOM | 2144 | N    | ALA | 137 | 3.464  | 5.629  | -0.067 |
| ATOM | 2145 | H    | ALA | 137 | 3.493  | 6.569  | -0.387 |
| ATOM | 2146 | CA   | ALA | 137 | 3.696  | 5.373  | 1.349  |
| ATOM | 2147 | HA   | ALA | 137 | 4.493  | 4.656  | 1.437  |
| ATOM | 2148 | CB   | ALA | 137 | 4.148  | 6.658  | 2.016  |
| ATOM | 2149 | HB1  | ALA | 137 | 4.242  | 6.944  | 2.230  |
| ATOM | 2150 | HB2  | ALA | 137 | 4.317  | 6.959  | 2.166  |
| ATOM | 2151 | HB3  | ALA | 137 | 4.225  | 6.994  | 2.147  |
| ATOM | 2152 | C    | ALA | 137 | 2.477  | 4.769  | 2.055  |
| ATOM | 2153 | O    | ALA | 137 | 2.629  | 3.862  | 2.853  |
| ATOM | 2154 | N    | LEU | 138 | 1.268  | 5.206  | 1.727  |
| ATOM | 2155 | H    | LEU | 138 | 1.204  | 5.964  | 1.090  |
| ATOM | 2156 | CA   | LEU | 138 | 0.031  | 4.624  | 2.243  |
| ATOM | 2157 | HA   | LEU | 138 | 0.113  | 4.579  | 3.313  |
| ATOM | 2158 | CB   | LEU | 138 | -1.134 | 5.537  | 1.882  |
| ATOM | 2159 | HB2  | LEU | 138 | -0.916 | 6.524  | 2.221  |
| ATOM | 2160 | HB3  | LEU | 138 | -1.215 | 5.581  | 0.824  |
| ATOM | 2161 | CG   | LEU | 138 | -2.479 | 5.115  | 2.446  |
| ATOM | 2162 | HG   | LEU | 138 | -2.705 | 4.257  | 2.170  |
| ATOM | 2163 | CD1  | LEU | 138 | -2.584 | 5.109  | 3.766  |
| ATOM | 2164 | HD11 | LEU | 138 | -2.575 | 5.090  | 4.104  |
| ATOM | 2165 | HD12 | LEU | 138 | -2.625 | 5.156  | 4.069  |
| ATOM | 2166 | HD13 | LEU | 138 | -2.643 | 5.060  | 4.092  |
| ATOM | 2167 | CD2  | LEU | 138 | -3.498 | 5.883  | 2.049  |
| ATOM | 2168 | HD21 | LEU | 138 | -3.784 | 6.045  | 1.994  |
| ATOM | 2169 | HD22 | LEU | 138 | -3.706 | 6.094  | 1.943  |
| ATOM | 2170 | HD23 | LEU | 138 | -3.752 | 6.054  | 1.917  |
| ATOM | 2171 | C    | LEU | 138 | -0.188 | 3.193  | 1.755  |

|      |      |      |     |     |        |        |        |
|------|------|------|-----|-----|--------|--------|--------|
| ATOM | 2172 | O    | LEU | 138 | -0.619 | 2.352  | 2.522  |
| ATOM | 2173 | N    | LEU | 139 | 0.154  | 2.893  | 0.511  |
| ATOM | 2174 | H    | LEU | 139 | 0.476  | 3.633  | -0.069 |
| ATOM | 2175 | CA   | LEU | 139 | 0.110  | 1.543  | -0.037 |
| ATOM | 2176 | HA   | LEU | 139 | -0.862 | 1.130  | 0.163  |
| ATOM | 2177 | CB   | LEU | 139 | 0.317  | 1.605  | -1.548 |
| ATOM | 2178 | HB2  | LEU | 139 | 0.436  | 2.277  | -1.868 |
| ATOM | 2179 | HB3  | LEU | 139 | 0.915  | 1.256  | -1.781 |
| ATOM | 2180 | CG   | LEU | 139 | -0.390 | 1.239  | -2.352 |
| ATOM | 2181 | HG   | LEU | 139 | -0.315 | 1.178  | -1.971 |
| ATOM | 2182 | CD1  | LEU | 139 | -0.989 | 1.245  | -3.026 |
| ATOM | 2183 | HD11 | LEU | 139 | -1.092 | 1.253  | -3.204 |
| ATOM | 2184 | HD12 | LEU | 139 | -1.181 | 1.198  | -3.220 |
| ATOM | 2185 | HD13 | LEU | 139 | -1.130 | 1.290  | -3.143 |
| ATOM | 2186 | CD2  | LEU | 139 | -0.608 | 0.954  | -3.072 |
| ATOM | 2187 | HD21 | LEU | 139 | -0.597 | 0.897  | -3.193 |
| ATOM | 2188 | HD22 | LEU | 139 | -0.678 | 0.858  | -3.253 |
| ATOM | 2189 | HD23 | LEU | 139 | -0.707 | 0.895  | -3.293 |
| ATOM | 2190 | C    | LEU | 139 | 1.118  | 0.621  | 0.642  |
| ATOM | 2191 | O    | LEU | 139 | 0.781  | -0.495 | 0.978  |
| ATOM | 2192 | N    | GLY | 140 | 2.317  | 1.106  | 0.923  |
| ATOM | 2193 | H    | GLY | 140 | 2.535  | 2.014  | 0.591  |
| ATOM | 2194 | CA   | GLY | 140 | 3.338  | 0.392  | 1.668  |
| ATOM | 2195 | HA2  | GLY | 140 | 3.557  | -0.530 | 1.176  |
| ATOM | 2196 | HA3  | GLY | 140 | 4.225  | 0.986  | 1.683  |
| ATOM | 2197 | C    | GLY | 140 | 2.954  | 0.086  | 3.106  |
| ATOM | 2198 | O    | GLY | 140 | 3.163  | -1.014 | 3.571  |
| ATOM | 2199 | N    | PHE | 141 | 2.315  | 1.016  | 3.795  |
| ATOM | 2200 | H    | PHE | 141 | 2.206  | 1.909  | 3.384  |
| ATOM | 2201 | CA   | PHE | 141 | 1.750  | 0.777  | 5.116  |
| ATOM | 2202 | HA   | PHE | 141 | 2.503  | 0.306  | 5.723  |
| ATOM | 2203 | CB   | PHE | 141 | 1.388  | 2.100  | 5.767  |
| ATOM | 2204 | HB2  | PHE | 141 | 2.205  | 2.759  | 5.684  |
| ATOM | 2205 | HB3  | PHE | 141 | 0.591  | 2.542  | 5.247  |
| ATOM | 2206 | CG   | PHE | 141 | 1.027  | 2.009  | 7.196  |
| ATOM | 2207 | CD1  | PHE | 141 | 0.977  | 1.984  | 7.851  |
| ATOM | 2208 | HD1  | PHE | 141 | 1.191  | 2.039  | 7.347  |
| ATOM | 2209 | CE1  | PHE | 141 | 0.648  | 1.882  | 9.163  |
| ATOM | 2210 | HE1  | PHE | 141 | 0.610  | 1.864  | 9.656  |
| ATOM | 2211 | CZ   | PHE | 141 | 0.368  | 1.810  | 9.831  |
| ATOM | 2212 | HZ   | PHE | 141 | 0.120  | 1.738  | 10.835 |
| ATOM | 2213 | CE2  | PHE | 141 | 0.418  | 1.839  | 9.186  |
| ATOM | 2214 | HE2  | PHE | 141 | 0.204  | 1.786  | 9.696  |
| ATOM | 2215 | CD2  | PHE | 141 | 0.746  | 1.939  | 7.873  |
| ATOM | 2216 | HD2  | PHE | 141 | 0.783  | 1.958  | 7.387  |
| ATOM | 2217 | C    | PHE | 141 | 0.561  | -0.177 | 5.064  |
| ATOM | 2218 | O    | PHE | 141 | 0.459  | -1.063 | 5.888  |
| ATOM | 2219 | N    | GLY | 142 | -0.294 | -0.061 | 4.057  |
| ATOM | 2220 | H    | GLY | 142 | -0.167 | 0.696  | 3.429  |
| ATOM | 2221 | CA   | GLY | 142 | -1.400 | -0.968 | 3.804  |
| ATOM | 2222 | HA2  | GLY | 142 | -2.081 | -0.936 | 4.630  |
| ATOM | 2223 | HA3  | GLY | 142 | -1.914 | -0.634 | 2.925  |
| ATOM | 2224 | C    | GLY | 142 | -0.972 | -2.410 | 3.584  |
| ATOM | 2225 | O    | GLY | 142 | -1.595 | -3.305 | 4.114  |
| ATOM | 2226 | N    | TYR | 143 | 0.128  | -2.643 | 2.883  |
| ATOM | 2227 | H    | TYR | 143 | 0.563  | -1.870 | 2.439  |
| ATOM | 2228 | CA   | TYR | 143 | 0.744  | -3.958 | 2.731  |
| ATOM | 2229 | HA   | TYR | 143 | 0.010  | -4.635 | 2.332  |
| ATOM | 2230 | CB   | TYR | 143 | 1.892  | -3.868 | 1.735  |
| ATOM | 2231 | HB2  | TYR | 143 | 1.477  | -3.741 | 0.761  |
| ATOM | 2232 | HB3  | TYR | 143 | 2.465  | -2.993 | 1.947  |
| ATOM | 2233 | CG   | TYR | 143 | 2.828  | -5.049 | 1.703  |
| ATOM | 2234 | CD1  | TYR | 143 | 2.388  | -6.283 | 1.307  |
| ATOM | 2235 | HD1  | TYR | 143 | 1.387  | -6.391 | 1.034  |
| ATOM | 2236 | CE1  | TYR | 143 | 3.246  | -7.378 | 1.281  |
| ATOM | 2237 | HE1  | TYR | 143 | 2.911  | -8.323 | 0.979  |
| ATOM | 2238 | CZ   | TYR | 143 | 4.553  | -7.248 | 1.667  |
| ATOM | 2239 | OH   | TYR | 143 | 5.371  | -8.310 | 1.656  |
| ATOM | 2240 | HH   | TYR | 143 | 6.216  | -8.121 | 1.984  |
| ATOM | 2241 | CE2  | TYR | 143 | 5.000  | -6.012 | 2.065  |
| ATOM | 2242 | HE2  | TYR | 143 | 6.002  | -5.906 | 2.342  |
| ATOM | 2243 | CD2  | TYR | 143 | 4.139  | -4.917 | 2.080  |
| ATOM | 2244 | HD2  | TYR | 143 | 4.488  | -3.976 | 2.377  |
| ATOM | 2245 | C    | TYR | 143 | 1.199  | -4.540 | 4.065  |
| ATOM | 2246 | O    | TYR | 143 | 0.859  | -5.664 | 4.382  |
| ATOM | 2247 | N    | ARG | 144 | 1.900  | -3.771 | 4.886  |
| ATOM | 2248 | H    | ARG | 144 | 2.125  | -2.856 | 4.578  |
| ATOM | 2249 | CA   | ARG | 144 | 2.354  | -4.213 | 6.204  |
| ATOM | 2250 | HA   | ARG | 144 | 2.826  | -5.174 | 6.091  |
| ATOM | 2251 | CB   | ARG | 144 | 3.370  | -3.230 | 6.771  |
| ATOM | 2252 | HB2  | ARG | 144 | 3.047  | -2.303 | 6.681  |
| ATOM | 2253 | HB3  | ARG | 144 | 3.494  | -3.381 | 7.738  |
| ATOM | 2254 | CG   | ARG | 144 | 4.668  | -3.268 | 6.207  |
| ATOM | 2255 | HG2  | ARG | 144 | 4.605  | -3.123 | 5.364  |
| ATOM | 2256 | HG3  | ARG | 144 | 5.134  | -2.613 | 6.537  |
| ATOM | 2257 | CD   | ARG | 144 | 5.446  | -4.354 | 6.358  |
| ATOM | 2258 | HD2  | ARG | 144 | 5.517  | -4.482 | 7.246  |
| ATOM | 2259 | HD3  | ARG | 144 | 4.956  | -5.038 | 6.029  |
| ATOM | 2260 | NE   | ARG | 144 | 6.735  | -4.322 | 5.777  |
| ATOM | 2261 | HE   | ARG | 144 | 7.182  | -3.580 | 5.739  |
| ATOM | 2262 | CZ   | ARG | 144 | 7.371  | -5.163 | 5.257  |
| ATOM | 2263 | NH1  | ARG | 144 | 6.966  | -6.198 | 5.245  |
| ATOM | 2264 | HH11 | ARG | 144 | 6.207  | -6.428 | 5.734  |
| ATOM | 2265 | HH12 | ARG | 144 | 7.475  | -6.779 | 4.779  |
| ATOM | 2266 | NH2  | ARG | 144 | 8.453  | -4.976 | 4.713  |
| ATOM | 2267 | HH21 | ARG | 144 | 8.842  | -4.216 | 4.748  |
| ATOM | 2268 | HH22 | ARG | 144 | 8.910  | -5.615 | 4.303  |
| ATOM | 2269 | C    | ARG | 144 | 1.206  | -4.460 | 7.167  |
| ATOM | 2270 | O    | ARG | 144 | 1.257  | -5.418 | 7.903  |
| ATOM | 2271 | N    | LEU | 145 | 0.150  | -3.671 | 7.119  |
| ATOM | 2272 | H    | LEU | 145 | 0.199  | -2.884 | 6.522  |
| ATOM | 2273 | CA   | LEU | 145 | -1.069 | -3.887 | 7.876  |
| ATOM | 2274 | HA   | LEU | 145 | -0.802 | -4.001 | 8.908  |
| ATOM | 2275 | CB   | LEU | 145 | -1.953 | -2.652 | 7.741  |
| ATOM | 2276 | HB2  | LEU | 145 | -1.408 | -1.811 | 8.047  |

|      |      |      |     |     |        |         |        |
|------|------|------|-----|-----|--------|---------|--------|
| ATOM | 2277 | HB3  | LEU | 145 | -2.184 | -2.512  | 6.730  |
| ATOM | 2278 | CG   | LEU | 145 | -3.238 | -2.678  | 8.504  |
| ATOM | 2279 | HG   | LEU | 145 | -3.647 | -3.393  | 8.366  |
| ATOM | 2280 | CD1  | LEU | 145 | -3.199 | -2.574  | 9.717  |
| ATOM | 2281 | HD11 | LEU | 145 | -3.206 | -2.495  | 10.029 |
| ATOM | 2282 | HD12 | LEU | 145 | -3.235 | -2.577  | 9.996  |
| ATOM | 2283 | HD13 | LEU | 145 | -3.141 | -2.585  | 10.016 |
| ATOM | 2284 | CD2  | LEU | 145 | -4.073 | -1.796  | 8.241  |
| ATOM | 2285 | HD21 | LEU | 145 | -4.296 | -1.557  | 8.213  |
| ATOM | 2286 | HD22 | LEU | 145 | -4.250 | -1.603  | 8.138  |
| ATOM | 2287 | HD23 | LEU | 145 | -4.291 | -1.595  | 8.180  |
| ATOM | 2288 | C    | LEU | 145 | -1.779 | -5.165  | 7.455  |
| ATOM | 2289 | O    | LEU | 145 | -2.129 | -5.961  | 8.294  |
| ATOM | 2290 | N    | ALA | 146 | -1.936 | -5.402  | 6.170  |
| ATOM | 2291 | H    | ALA | 146 | -1.633 | -4.715  | 5.527  |
| ATOM | 2292 | CA   | ALA | 146 | -2.556 | -6.595  | 5.642  |
| ATOM | 2293 | HA   | ALA | 146 | -3.527 | -6.696  | 6.079  |
| ATOM | 2294 | CB   | ALA | 146 | -2.730 | -6.429  | 4.153  |
| ATOM | 2295 | HB1  | ALA | 146 | -2.777 | -6.371  | 3.801  |
| ATOM | 2296 | HB2  | ALA | 146 | -2.758 | -6.399  | 3.781  |
| ATOM | 2297 | HB3  | ALA | 146 | -2.792 | -6.403  | 3.797  |
| ATOM | 2298 | C    | ALA | 146 | -1.784 | -7.861  | 5.983  |
| ATOM | 2299 | O    | ALA | 146 | -2.361 | -8.835  | 6.371  |
| ATOM | 2300 | N    | LEU | 147 | -0.480 | -7.835  | 5.914  |
| ATOM | 2301 | H    | LEU | 147 | -0.063 | -7.022  | 5.556  |
| ATOM | 2302 | CA   | LEU | 147 | 0.366  | -8.952  | 6.279  |
| ATOM | 2303 | HA   | LEU | 147 | -0.052 | -9.830  | 5.848  |
| ATOM | 2304 | CB   | LEU | 147 | 1.738  | -8.749  | 5.691  |
| ATOM | 2305 | HB2  | LEU | 147 | 1.851  | -8.128  | 5.177  |
| ATOM | 2306 | HB3  | LEU | 147 | 2.258  | -8.589  | 6.235  |
| ATOM | 2307 | CG   | LEU | 147 | 2.308  | -9.567  | 5.068  |
| ATOM | 2308 | HG   | LEU | 147 | 2.339  | -9.563  | 5.392  |
| ATOM | 2309 | CD1  | LEU | 147 | 2.421  | -10.321 | 4.495  |
| ATOM | 2310 | HD11 | LEU | 147 | 2.451  | -10.556 | 4.358  |
| ATOM | 2311 | HD12 | LEU | 147 | 2.475  | -10.483 | 4.392  |
| ATOM | 2312 | HD13 | LEU | 147 | 2.425  | -10.484 | 4.323  |
| ATOM | 2313 | CD2  | LEU | 147 | 2.800  | -9.641  | 4.544  |
| ATOM | 2314 | HD21 | LEU | 147 | 2.897  | -9.678  | 4.357  |
| ATOM | 2315 | HD22 | LEU | 147 | 2.911  | -9.587  | 4.448  |
| ATOM | 2316 | HD23 | LEU | 147 | 2.955  | -9.711  | 4.447  |
| ATOM | 2317 | C    | LEU | 147 | 0.403  | -9.201  | 7.772  |
| ATOM | 2318 | O    | LEU | 147 | 0.494  | -10.310 | 8.173  |
| ATOM | 2319 | N    | HIP | 148 | 0.255  | -8.203  | 8.603  |
| ATOM | 2320 | H    | HIP | 148 | 0.202  | -7.320  | 8.218  |
| ATOM | 2321 | CA   | HIP | 148 | 0.223  | -8.326  | 10.044 |
| ATOM | 2322 | HA   | HIP | 148 | 1.071  | -8.851  | 10.326 |
| ATOM | 2323 | CB   | HIP | 148 | 0.278  | -6.989  | 10.686 |
| ATOM | 2324 | HB2  | HIP | 148 | 0.920  | -6.432  | 10.263 |
| ATOM | 2325 | HB3  | HIP | 148 | -0.529 | -6.546  | 10.597 |
| ATOM | 2326 | CG   | HIP | 148 | 0.573  | -6.947  | 11.989 |
| ATOM | 2327 | ND1  | HIP | 148 | 1.045  | -6.998  | 12.681 |
| ATOM | 2328 | HD1  | HIP | 148 | 1.247  | -7.087  | 12.411 |
| ATOM | 2329 | CE1  | HIP | 148 | 1.192  | -6.917  | 13.784 |
| ATOM | 2330 | HE1  | HIP | 148 | 1.544  | -6.932  | 14.521 |
| ATOM | 2331 | NE2  | HIP | 148 | 0.824  | -6.818  | 13.812 |
| ATOM | 2332 | HE2  | HIP | 148 | 0.840  | -6.748  | 14.524 |
| ATOM | 2333 | CD2  | HIP | 148 | 0.435  | -6.833  | 12.695 |
| ATOM | 2334 | HD2  | HIP | 148 | 0.091  | -6.768  | 12.429 |
| ATOM | 2335 | C    | HIP | 148 | -0.923 | -9.107  | 10.552 |
| ATOM | 2336 | O    | HIP | 148 | -0.787 | -9.834  | 11.444 |
| ATOM | 2337 | N    | VAL | 149 | -2.031 | -9.014  | 9.967  |
| ATOM | 2338 | H    | VAL | 149 | -2.089 | -8.390  | 9.255  |
| ATOM | 2339 | CA   | VAL | 149 | -3.164 | -9.792  | 10.316 |
| ATOM | 2340 | HA   | VAL | 149 | -3.125 | -9.948  | 11.334 |
| ATOM | 2341 | CB   | VAL | 149 | -4.392 | -9.075  | 10.066 |
| ATOM | 2342 | HB   | VAL | 149 | -4.776 | -9.417  | 9.901  |
| ATOM | 2343 | CG1  | VAL | 149 | -4.910 | -8.576  | 10.654 |
| ATOM | 2344 | HG11 | VAL | 149 | -4.965 | -8.460  | 10.801 |
| ATOM | 2345 | HG12 | VAL | 149 | -5.110 | -8.397  | 10.781 |
| ATOM | 2346 | HG13 | VAL | 149 | -5.049 | -8.507  | 10.810 |
| ATOM | 2347 | CG2  | VAL | 149 | -4.671 | -8.370  | 9.494  |
| ATOM | 2348 | HG21 | VAL | 149 | -4.770 | -8.234  | 9.318  |
| ATOM | 2349 | HG22 | VAL | 149 | -4.802 | -8.175  | 9.392  |
| ATOM | 2350 | HG23 | VAL | 149 | -4.662 | -8.179  | 9.355  |
| ATOM | 2351 | C    | VAL | 149 | -3.179 | -11.153 | 9.692  |
| ATOM | 2352 | O    | VAL | 149 | -3.601 | -12.069 | 10.289 |
| ATOM | 2353 | N    | TYR | 150 | -2.641 | -11.319 | 8.538  |
| ATOM | 2354 | H    | TYR | 150 | -2.322 | -10.537 | 8.092  |
| ATOM | 2355 | CA   | TYR | 150 | -2.519 | -12.559 | 7.857  |
| ATOM | 2356 | HA   | TYR | 150 | -3.470 | -12.979 | 7.774  |
| ATOM | 2357 | CB   | TYR | 150 | -1.993 | -12.302 | 6.480  |
| ATOM | 2358 | HB2  | TYR | 150 | -2.567 | -11.643 | 6.046  |
| ATOM | 2359 | HB3  | TYR | 150 | -1.098 | -11.898 | 6.518  |
| ATOM | 2360 | CG   | TYR | 150 | -1.887 | -13.377 | 5.596  |
| ATOM | 2361 | CD1  | TYR | 150 | -1.012 | -14.107 | 5.410  |
| ATOM | 2362 | HD1  | TYR | 150 | -0.413 | -13.916 | 5.899  |
| ATOM | 2363 | CE1  | TYR | 150 | -0.916 | -15.093 | 4.584  |
| ATOM | 2364 | HE1  | TYR | 150 | -0.250 | -15.651 | 4.446  |
| ATOM | 2365 | CZ   | TYR | 150 | -1.691 | -15.350 | 3.934  |
| ATOM | 2366 | OH   | TYR | 150 | -1.610 | -16.297 | 3.144  |
| ATOM | 2367 | HH   | TYR | 150 | -1.044 | -16.763 | 3.083  |
| ATOM | 2368 | CE2  | TYR | 150 | -2.561 | -14.612 | 4.109  |
| ATOM | 2369 | HE2  | TYR | 150 | -3.146 | -14.811 | 3.605  |
| ATOM | 2370 | CD2  | TYR | 150 | -2.659 | -13.629 | 4.938  |
| ATOM | 2371 | HD2  | TYR | 150 | -3.326 | -13.069 | 5.068  |
| ATOM | 2372 | C    | TYR | 150 | -1.686 | -13.534 | 8.593  |
| ATOM | 2373 | O    | TYR | 150 | -1.987 | -14.638 | 8.681  |
| ATOM | 2374 | N    | GLN | 151 | -0.682 | -13.123 | 9.192  |
| ATOM | 2375 | H    | GLN | 151 | -0.471 | -12.218 | 9.062  |
| ATOM | 2376 | CA   | GLN | 151 | 0.160  | -13.914 | 9.992  |
| ATOM | 2377 | HA   | GLN | 151 | 0.361  | -14.784 | 9.510  |
| ATOM | 2378 | CB   | GLN | 151 | 1.398  | -13.233 | 10.169 |
| ATOM | 2379 | HB2  | GLN | 151 | 1.321  | -12.449 | 10.334 |
| ATOM | 2380 | HB3  | GLN | 151 | 1.824  | -13.535 | 10.783 |
| ATOM | 2381 | CG   | GLN | 151 | 2.190  | -13.221 | 9.315  |

|      |      |      |     |     |         |         |        |
|------|------|------|-----|-----|---------|---------|--------|
| ATOM | 2382 | HG2  | GLN | 151 | 2.326   | -13.885 | 9.251  |
| ATOM | 2383 | HG3  | GLN | 151 | 1.892   | -13.056 | 8.737  |
| ATOM | 2384 | CD   | GLN | 151 | 3.221   | -12.554 | 9.308  |
| ATOM | 2385 | OE1  | GLN | 151 | 3.334   | -11.907 | 9.721  |
| ATOM | 2386 | NE2  | GLN | 151 | 4.014   | -12.682 | 8.833  |
| ATOM | 2387 | HE21 | GLN | 151 | 4.690   | -12.254 | 8.828  |
| ATOM | 2388 | HE22 | GLN | 151 | 3.949   | -13.218 | 8.497  |
| ATOM | 2389 | C    | GLN | 151 | -0.416  | -14.304 | 11.273 |
| ATOM | 2390 | O    | GLN | 151 | 0.017   | -15.173 | 11.872 |
| ATOM | 2391 | N    | HIP | 152 | -1.413  | -13.701 | 11.686 |
| ATOM | 2392 | H    | HIP | 152 | -1.698  | -12.985 | 11.161 |
| ATOM | 2393 | CA   | HIP | 152 | -2.135  | -14.032 | 12.827 |
| ATOM | 2394 | HA   | HIP | 152 | -1.620  | -14.682 | 13.381 |
| ATOM | 2395 | CB   | HIP | 152 | -2.302  | -12.910 | 13.602 |
| ATOM | 2396 | HB2  | HIP | 152 | -2.137  | -12.244 | 13.324 |
| ATOM | 2397 | HB3  | HIP | 152 | -2.941  | -12.806 | 13.813 |
| ATOM | 2398 | CG   | HIP | 152 | -1.843  | -12.783 | 14.485 |
| ATOM | 2399 | ND1  | HIP | 152 | -1.536  | -12.829 | 15.064 |
| ATOM | 2400 | HD1  | HIP | 152 | -1.585  | -12.950 | 14.975 |
| ATOM | 2401 | CE1  | HIP | 152 | -1.162  | -12.692 | 15.768 |
| ATOM | 2402 | HE1  | HIP | 152 | -0.863  | -12.695 | 16.330 |
| ATOM | 2403 | NE2  | HIP | 152 | -1.222  | -12.559 | 15.654 |
| ATOM | 2404 | HE2  | HIP | 152 | -0.994  | -12.448 | 16.079 |
| ATOM | 2405 | CD2  | HIP | 152 | -1.646  | -12.613 | 14.855 |
| ATOM | 2406 | HD2  | HIP | 152 | -1.791  | -12.543 | 14.571 |
| ATOM | 2407 | C    | HIP | 152 | -3.342  | -14.679 | 12.570 |
| ATOM | 2408 | O    | HIP | 152 | -4.092  | -14.757 | 13.236 |
| ATOM | 2409 | N    | GLY | 153 | -3.541  | -15.141 | 11.602 |
| ATOM | 2410 | H    | GLY | 153 | -2.894  | -15.044 | 11.093 |
| ATOM | 2411 | CA   | GLY | 153 | -4.593  | -15.840 | 11.258 |
| ATOM | 2412 | HA2  | GLY | 153 | -4.374  | -16.337 | 10.865 |
| ATOM | 2413 | HA3  | GLY | 153 | -4.817  | -16.120 | 11.807 |
| ATOM | 2414 | C    | GLY | 153 | -5.695  | -15.588 | 10.666 |
| ATOM | 2415 | O    | GLY | 153 | -6.272  | -16.300 | 10.460 |
| ATOM | 2416 | N    | LEU | 154 | -6.002  | -14.594 | 10.380 |
| ATOM | 2417 | H    | LEU | 154 | -5.478  | -14.052 | 10.551 |
| ATOM | 2418 | CA   | LEU | 154 | -7.054  | -14.227 | 9.835  |
| ATOM | 2419 | HA   | LEU | 154 | -7.650  | -14.899 | 10.020 |
| ATOM | 2420 | CB   | LEU | 154 | -7.466  | -13.241 | 10.444 |
| ATOM | 2421 | HB2  | LEU | 154 | -7.031  | -12.909 | 10.605 |
| ATOM | 2422 | HB3  | LEU | 154 | -7.810  | -12.789 | 10.086 |
| ATOM | 2423 | CG   | LEU | 154 | -8.003  | -13.257 | 11.295 |
| ATOM | 2424 | HG   | LEU | 154 | -7.687  | -13.398 | 11.286 |
| ATOM | 2425 | CD1  | LEU | 154 | -8.357  | -12.975 | 11.743 |
| ATOM | 2426 | HD11 | LEU | 154 | -8.410  | -12.910 | 11.899 |
| ATOM | 2427 | HD12 | LEU | 154 | -8.485  | -12.837 | 11.810 |
| ATOM | 2428 | HD13 | LEU | 154 | -8.435  | -12.973 | 11.848 |
| ATOM | 2429 | CD2  | LEU | 154 | -8.636  | -13.318 | 11.750 |
| ATOM | 2430 | HD21 | LEU | 154 | -8.767  | -13.354 | 11.904 |
| ATOM | 2431 | HD22 | LEU | 154 | -8.810  | -13.346 | 11.876 |
| ATOM | 2432 | HD23 | LEU | 154 | -8.795  | -13.302 | 11.811 |
| ATOM | 2433 | C    | LEU | 154 | -6.986  | -13.992 | 8.438  |
| ATOM | 2434 | O    | LEU | 154 | -7.034  | -12.996 | 8.003  |
| ATOM | 2435 | N    | THR | 155 | -6.859  | -14.919 | 7.717  |
| ATOM | 2436 | H    | THR | 155 | -6.840  | -15.712 | 8.119  |
| ATOM | 2437 | CA   | THR | 155 | -6.677  | -14.859 | 6.372  |
| ATOM | 2438 | HA   | THR | 155 | -5.937  | -14.249 | 6.195  |
| ATOM | 2439 | CB   | THR | 155 | -6.306  | -16.074 | 5.899  |
| ATOM | 2440 | HB   | THR | 155 | -6.418  | -16.139 | 5.166  |
| ATOM | 2441 | CG2  | THR | 155 | -5.309  | -16.397 | 6.024  |
| ATOM | 2442 | HG21 | THR | 155 | -5.087  | -16.488 | 6.028  |
| ATOM | 2443 | HG22 | THR | 155 | -5.042  | -16.449 | 6.045  |
| ATOM | 2444 | HG23 | THR | 155 | -5.063  | -16.493 | 6.070  |
| ATOM | 2445 | OG1  | THR | 155 | -6.728  | -16.866 | 6.276  |
| ATOM | 2446 | HG1  | THR | 155 | -6.617  | -17.480 | 5.975  |
| ATOM | 2447 | C    | THR | 155 | -7.783  | -14.377 | 5.619  |
| ATOM | 2448 | O    | THR | 155 | -7.726  | -13.753 | 4.723  |
| ATOM | 2449 | N    | GLY | 156 | -8.792  | -14.589 | 6.001  |
| ATOM | 2450 | H    | GLY | 156 | -8.780  | -15.119 | 6.728  |
| ATOM | 2451 | CA   | GLY | 156 | -9.912  | -14.091 | 5.433  |
| ATOM | 2452 | HA2  | GLY | 156 | -9.919  | -14.320 | 4.458  |
| ATOM | 2453 | HA3  | GLY | 156 | -10.691 | -14.550 | 5.872  |
| ATOM | 2454 | C    | GLY | 156 | -10.077 | -12.662 | 5.552  |
| ATOM | 2455 | O    | GLY | 156 | -10.795 | -12.108 | 4.871  |
| ATOM | 2456 | N    | PHE | 157 | -9.390  | -12.047 | 6.379  |
| ATOM | 2457 | H    | PHE | 157 | -8.822  | -12.554 | 6.914  |
| ATOM | 2458 | CA   | PHE | 157 | -9.431  | -10.673 | 6.578  |
| ATOM | 2459 | HA   | PHE | 157 | -10.394 | -10.363 | 6.490  |
| ATOM | 2460 | CB   | PHE | 157 | -9.019  | -10.439 | 7.939  |
| ATOM | 2461 | HB2  | PHE | 157 | -9.115  | -11.022 | 8.488  |
| ATOM | 2462 | HB3  | PHE | 157 | -8.279  | -10.325 | 7.973  |
| ATOM | 2463 | CG   | PHE | 157 | -9.442  | -9.609  | 8.564  |
| ATOM | 2464 | CD1  | PHE | 157 | -9.359  | -9.185  | 8.735  |
| ATOM | 2465 | HD1  | PHE | 157 | -9.001  | -9.448  | 8.409  |
| ATOM | 2466 | CE1  | PHE | 157 | -9.746  | -8.422  | 9.329  |
| ATOM | 2467 | HE1  | PHE | 157 | -9.680  | -8.102  | 9.455  |
| ATOM | 2468 | CZ   | PHE | 157 | -10.220 | -8.077  | 9.753  |
| ATOM | 2469 | HZ   | PHE | 157 | -10.517 | -7.492  | 10.203 |
| ATOM | 2470 | CE2  | PHE | 157 | -10.308 | -8.496  | 9.586  |
| ATOM | 2471 | HE2  | PHE | 157 | -10.671 | -8.232  | 9.913  |
| ATOM | 2472 | CD2  | PHE | 157 | -9.919  | -9.260  | 8.996  |
| ATOM | 2473 | HD2  | PHE | 157 | -9.989  | -9.578  | 8.875  |
| ATOM | 2474 | C    | PHE | 157 | -8.668  | -9.868  | 5.580  |
| ATOM | 2475 | O    | PHE | 157 | -8.903  | -8.702  | 5.448  |
| ATOM | 2476 | N    | LEU | 158 | -7.797  | -10.471 | 4.828  |
| ATOM | 2477 | H    | LEU | 158 | -7.650  | -11.423 | 4.972  |
| ATOM | 2478 | CA   | LEU | 158 | -7.056  | -9.818  | 3.807  |
| ATOM | 2479 | HA   | LEU | 158 | -6.510  | -9.046  | 4.254  |
| ATOM | 2480 | CB   | LEU | 158 | -6.082  | -10.809 | 3.230  |
| ATOM | 2481 | HB2  | LEU | 158 | -5.602  | -11.246 | 3.892  |
| ATOM | 2482 | HB3  | LEU | 158 | -6.533  | -11.462 | 2.793  |
| ATOM | 2483 | CG   | LEU | 158 | -5.139  | -10.411 | 2.368  |
| ATOM | 2484 | HG   | LEU | 158 | -5.511  | -10.083 | 1.913  |
| ATOM | 2485 | CD1  | LEU | 158 | -4.293  | -9.832  | 2.575  |
| ATOM | 2486 | HD11 | LEU | 158 | -4.103  | -9.660  | 2.658  |



|      |      |      |     |     |         |         |        |
|------|------|------|-----|-----|---------|---------|--------|
| ATOM | 2487 | HD12 | LEU | 158 | -4.077  | -9.730  | 2.653  |
| ATOM | 2488 | HD13 | LEU | 158 | -4.083  | -9.677  | 2.550  |
| ATOM | 2489 | CD2  | LEU | 158 | -4.477  | -11.078 | 1.871  |
| ATOM | 2490 | HD21 | LEU | 158 | -4.300  | -11.225 | 1.776  |
| ATOM | 2491 | HD22 | LEU | 158 | -4.349  | -11.277 | 1.753  |
| ATOM | 2492 | HD23 | LEU | 158 | -4.300  | -11.219 | 1.711  |
| ATOM | 2493 | C    | LEU | 158 | -7.947  | -9.168  | 2.778  |
| ATOM | 2494 | O    | LEU | 158 | -7.695  | -8.080  | 2.364  |
| ATOM | 2495 | N    | GLY | 159 | -9.026  | -9.781  | 2.418  |
| ATOM | 2496 | H    | GLY | 159 | -9.177  | -10.669 | 2.779  |
| ATOM | 2497 | CA   | GLY | 159 | -10.031 | -9.211  | 1.566  |
| ATOM | 2498 | HA2  | GLY | 159 | -9.597  | -8.920  | 0.662  |
| ATOM | 2499 | HA3  | GLY | 159 | -10.743 | -9.947  | 1.362  |
| ATOM | 2500 | C    | GLY | 159 | -10.748 | -8.026  | 2.145  |
| ATOM | 2501 | O    | GLY | 159 | -11.002 | -7.084  | 1.479  |
| ATOM | 2502 | N    | GLN | 160 | -11.004 | -8.020  | 3.398  |
| ATOM | 2503 | H    | GLN | 160 | -10.754 | -8.808  | 3.896  |
| ATOM | 2504 | CA   | GLN | 160 | -11.624 | -6.920  | 4.086  |
| ATOM | 2505 | HA   | GLN | 160 | -12.463 | -6.594  | 3.528  |
| ATOM | 2506 | CB   | GLN | 160 | -12.106 | -7.370  | 5.414  |
| ATOM | 2507 | HB2  | GLN | 160 | -11.751 | -7.912  | 5.766  |
| ATOM | 2508 | HB3  | GLN | 160 | -12.101 | -6.879  | 5.943  |
| ATOM | 2509 | CG   | GLN | 160 | -13.088 | -7.735  | 5.592  |
| ATOM | 2510 | HG2  | GLN | 160 | -13.238 | -7.607  | 5.433  |
| ATOM | 2511 | HG3  | GLN | 160 | -13.218 | -7.989  | 5.471  |
| ATOM | 2512 | CD   | GLN | 160 | -13.709 | -7.938  | 6.170  |
| ATOM | 2513 | OE1  | GLN | 160 | -13.669 | -7.953  | 6.398  |
| ATOM | 2514 | NE2  | GLN | 160 | -14.309 | -8.102  | 6.428  |
| ATOM | 2515 | HE21 | GLN | 160 | -14.713 | -8.232  | 6.806  |
| ATOM | 2516 | HE22 | GLN | 160 | -14.368 | -8.097  | 6.249  |
| ATOM | 2517 | C    | GLN | 160 | -10.724 | -5.736  | 4.207  |
| ATOM | 2518 | O    | GLN | 160 | -11.160 | -4.633  | 3.990  |
| ATOM | 2519 | N    | VAL | 161 | -9.461  | -5.947  | 4.467  |
| ATOM | 2520 | H    | VAL | 161 | -9.171  | -6.863  | 4.677  |
| ATOM | 2521 | CA   | VAL | 161 | -8.488  | -4.896  | 4.474  |
| ATOM | 2522 | HA   | VAL | 161 | -8.874  | -4.095  | 5.055  |
| ATOM | 2523 | CB   | VAL | 161 | -7.201  | -5.353  | 5.110  |
| ATOM | 2524 | HB   | VAL | 161 | -6.998  | -6.064  | 4.904  |
| ATOM | 2525 | CG1  | VAL | 161 | -6.234  | -4.790  | 4.956  |
| ATOM | 2526 | HG11 | VAL | 161 | -5.980  | -4.653  | 4.927  |
| ATOM | 2527 | HG12 | VAL | 161 | -5.970  | -4.677  | 4.909  |
| ATOM | 2528 | HG13 | VAL | 161 | -6.033  | -4.639  | 4.924  |
| ATOM | 2529 | CG2  | VAL | 161 | -7.107  | -5.422  | 6.257  |
| ATOM | 2530 | HG21 | VAL | 161 | -7.108  | -5.413  | 6.555  |
| ATOM | 2531 | HG22 | VAL | 161 | -7.075  | -5.469  | 6.546  |
| ATOM | 2532 | HG23 | VAL | 161 | -7.061  | -5.448  | 6.518  |
| ATOM | 2533 | C    | VAL | 161 | -8.275  | -4.335  | 3.112  |
| ATOM | 2534 | O    | VAL | 161 | -8.187  | -3.149  | 2.968  |
| ATOM | 2535 | N    | THR | 162 | -8.279  | -5.150  | 2.099  |
| ATOM | 2536 | H    | THR | 162 | -8.340  | -6.108  | 2.279  |
| ATOM | 2537 | CA   | THR | 162 | -8.210  | -4.710  | 0.735  |
| ATOM | 2538 | HA   | THR | 162 | -7.336  | -4.138  | 0.612  |
| ATOM | 2539 | CB   | THR | 162 | -8.115  | -5.884  | -0.195 |
| ATOM | 2540 | HB   | THR | 162 | -8.874  | -6.362  | -0.183 |
| ATOM | 2541 | CG2  | THR | 162 | -7.896  | -5.615  | -1.425 |
| ATOM | 2542 | HG21 | THR | 162 | -7.847  | -5.551  | -1.725 |
| ATOM | 2543 | HG22 | THR | 162 | -7.844  | -5.555  | -1.725 |
| ATOM | 2544 | HG23 | THR | 162 | -7.852  | -5.556  | -1.728 |
| ATOM | 2545 | OG1  | THR | 162 | -7.230  | -6.688  | 0.043  |
| ATOM | 2546 | HG1  | THR | 162 | -7.358  | -7.167  | 0.671  |
| ATOM | 2547 | C    | THR | 162 | -9.371  | -3.811  | 0.374  |
| ATOM | 2548 | O    | THR | 162 | -9.192  | -2.783  | -0.179 |
| ATOM | 2549 | N    | ARG | 163 | -10.558 | -4.140  | 0.749  |
| ATOM | 2550 | H    | ARG | 163 | -10.641 | -4.998  | 1.191  |
| ATOM | 2551 | CA   | ARG | 163 | -11.739 | -3.320  | 0.533  |
| ATOM | 2552 | HA   | ARG | 163 | -11.769 | -3.024  | -0.475 |
| ATOM | 2553 | CB   | ARG | 163 | -12.950 | -4.126  | 0.809  |
| ATOM | 2554 | HB2  | ARG | 163 | -12.901 | -4.778  | 1.062  |
| ATOM | 2555 | HB3  | ARG | 163 | -13.387 | -3.901  | 1.260  |
| ATOM | 2556 | CG   | ARG | 163 | -13.655 | -4.368  | 0.131  |
| ATOM | 2557 | HG2  | ARG | 163 | -13.795 | -4.164  | -0.081 |
| ATOM | 2558 | HG3  | ARG | 163 | -13.418 | -4.435  | 0.054  |
| ATOM | 2559 | CD   | ARG | 163 | -14.517 | -4.804  | -0.158 |
| ATOM | 2560 | HD2  | ARG | 163 | -14.780 | -4.792  | -0.074 |
| ATOM | 2561 | HD3  | ARG | 163 | -14.795 | -4.886  | -0.360 |
| ATOM | 2562 | NE   | ARG | 163 | -14.650 | -5.122  | -0.297 |
| ATOM | 2563 | HE   | ARG | 163 | -14.583 | -4.956  | -0.251 |
| ATOM | 2564 | CZ   | ARG | 163 | -14.868 | -5.602  | -0.490 |
| ATOM | 2565 | NH1  | ARG | 163 | -14.999 | -5.877  | -0.585 |
| ATOM | 2566 | HH11 | ARG | 163 | -14.958 | -5.734  | -0.519 |
| ATOM | 2567 | HH12 | ARG | 163 | -15.175 | -6.243  | -0.739 |
| ATOM | 2568 | NH2  | ARG | 163 | -14.956 | -5.820  | -0.595 |
| ATOM | 2569 | HH21 | ARG | 163 | -14.871 | -5.624  | -0.530 |
| ATOM | 2570 | HH22 | ARG | 163 | -15.134 | -6.186  | -0.750 |
| ATOM | 2571 | C    | ARG | 163 | -11.732 | -2.038  | 1.300  |
| ATOM | 2572 | O    | ARG | 163 | -12.155 | -1.042  | 0.782  |
| ATOM | 2573 | N    | PHE | 164 | -11.199 | -2.028  | 2.483  |
| ATOM | 2574 | H    | PHE | 164 | -10.896 | -2.885  | 2.855  |
| ATOM | 2575 | CA   | PHE | 164 | -11.076 | -0.839  | 3.276  |
| ATOM | 2576 | HA   | PHE | 164 | -12.025 | -0.357  | 3.329  |
| ATOM | 2577 | CB   | PHE | 164 | -10.665 | -1.230  | 4.658  |
| ATOM | 2578 | HB2  | PHE | 164 | -11.306 | -1.844  | 5.054  |
| ATOM | 2579 | HB3  | PHE | 164 | -9.825  | -1.724  | 4.639  |
| ATOM | 2580 | CG   | PHE | 164 | -10.527 | -0.195  | 5.553  |
| ATOM | 2581 | CD1  | PHE | 164 | -9.721  | 0.288   | 5.813  |
| ATOM | 2582 | HD1  | PHE | 164 | -9.196  | -0.082  | 5.391  |
| ATOM | 2583 | CE1  | PHE | 164 | -9.601  | 1.260   | 6.618  |
| ATOM | 2584 | HE1  | PHE | 164 | -8.988  | 1.626   | 6.814  |
| ATOM | 2585 | CZ   | PHE | 164 | -10.284 | 1.750   | 7.170  |
| ATOM | 2586 | HZ   | PHE | 164 | -10.193 | 2.492   | 7.788  |
| ATOM | 2587 | CE2  | PHE | 164 | -11.086 | 1.268   | 6.921  |
| ATOM | 2588 | HE2  | PHE | 164 | -11.607 | 1.641   | 7.348  |
| ATOM | 2589 | CD2  | PHE | 164 | -11.209 | 0.299   | 6.114  |
| ATOM | 2590 | HD2  | PHE | 164 | -11.826 | -0.065  | 5.923  |
| ATOM | 2591 | C    | PHE | 164 | -10.144 | 0.171   | 2.688  |

|      |      |      |     |     |         |        |        |
|------|------|------|-----|-----|---------|--------|--------|
| ATOM | 2592 | O    | PHE | 164 | -10.460 | 1.339  | 2.676  |
| ATOM | 2593 | N    | VAL | 165 | -9.022  | -0.254 | 2.155  |
| ATOM | 2594 | H    | VAL | 165 | -8.807  | -1.217 | 2.203  |
| ATOM | 2595 | CA   | VAL | 165 | -8.078  | 0.632  | 1.522  |
| ATOM | 2596 | HA   | VAL | 165 | -7.910  | 1.451  | 2.172  |
| ATOM | 2597 | CB   | VAL | 165 | -6.745  | -0.061 | 1.302  |
| ATOM | 2598 | HB   | VAL | 165 | -6.741  | -0.550 | 0.823  |
| ATOM | 2599 | CG1  | VAL | 165 | -5.855  | 0.421  | 1.002  |
| ATOM | 2600 | HG11 | VAL | 165 | -5.651  | 0.554  | 0.940  |
| ATOM | 2601 | HG12 | VAL | 165 | -5.618  | 0.526  | 0.934  |
| ATOM | 2602 | HG13 | VAL | 165 | -5.637  | 0.526  | 0.904  |
| ATOM | 2603 | CG2  | VAL | 165 | -6.224  | -0.587 | 2.047  |
| ATOM | 2604 | HG21 | VAL | 165 | -6.105  | -0.715 | 2.258  |
| ATOM | 2605 | HG22 | VAL | 165 | -6.131  | -0.746 | 2.216  |
| ATOM | 2606 | HG23 | VAL | 165 | -6.046  | -0.697 | 2.210  |
| ATOM | 2607 | C    | VAL | 165 | -8.632  | 1.241  | 0.255  |
| ATOM | 2608 | O    | VAL | 165 | -8.450  | 2.384  | 0.004  |
| ATOM | 2609 | N    | VAL | 166 | -9.364  | 0.526  | -0.514 |
| ATOM | 2610 | H    | VAL | 166 | -9.472  | -0.403 | -0.261 |
| ATOM | 2611 | CA   | VAL | 166 | -10.012 | 1.043  | -1.706 |
| ATOM | 2612 | HA   | VAL | 166 | -9.320  | 1.626  | -2.244 |
| ATOM | 2613 | CB   | VAL | 166 | -10.430 | -0.082 | -2.589 |
| ATOM | 2614 | HB   | VAL | 166 | -10.967 | -0.479 | -2.295 |
| ATOM | 2615 | CG1  | VAL | 166 | -10.803 | 0.141  | -3.593 |
| ATOM | 2616 | HG11 | VAL | 166 | -10.951 | 0.265  | -3.800 |
| ATOM | 2617 | HG12 | VAL | 166 | -10.800 | 0.231  | -3.904 |
| ATOM | 2618 | HG13 | VAL | 166 | -10.943 | 0.080  | -3.819 |
| ATOM | 2619 | CG2  | VAL | 166 | -9.730  | -0.943 | -2.929 |
| ATOM | 2620 | HG21 | VAL | 166 | -9.573  | -1.142 | -3.013 |
| ATOM | 2621 | HG22 | VAL | 166 | -9.558  | -1.170 | -3.007 |
| ATOM | 2622 | HG23 | VAL | 166 | -9.556  | -1.162 | -3.023 |
| ATOM | 2623 | C    | VAL | 166 | -11.151 | 1.978  | -1.397 |
| ATOM | 2624 | O    | VAL | 166 | -11.298 | 2.987  | -2.051 |
| ATOM | 2625 | N    | ASP | 167 | -11.915 | 1.706  | -0.363 |
| ATOM | 2626 | H    | ASP | 167 | -11.763 | 0.858  | 0.125  |
| ATOM | 2627 | CA   | ASP | 167 | -12.986 | 2.573  | 0.092  |
| ATOM | 2628 | HA   | ASP | 167 | -13.631 | 2.782  | -0.739 |
| ATOM | 2629 | CB   | ASP | 167 | -13.794 | 1.842  | 1.143  |
| ATOM | 2630 | HB2  | ASP | 167 | -14.096 | 0.900  | 0.762  |
| ATOM | 2631 | HB3  | ASP | 167 | -13.198 | 1.664  | 2.001  |
| ATOM | 2632 | CG   | ASP | 167 | -15.013 | 2.609  | 1.533  |
| ATOM | 2633 | OD1  | ASP | 167 | -15.501 | 2.908  | 1.683  |
| ATOM | 2634 | OD2  | ASP | 167 | -15.487 | 2.931  | 1.674  |
| ATOM | 2635 | C    | ASP | 167 | -12.475 | 3.910  | 0.607  |
| ATOM | 2636 | O    | ASP | 167 | -13.053 | 4.937  | 0.298  |
| ATOM | 2637 | N    | PHE | 168 | -11.355 | 3.920  | 1.317  |
| ATOM | 2638 | H    | PHE | 168 | -10.937 | 3.052  | 1.551  |
| ATOM | 2639 | CA   | PHE | 168 | -10.700 | 5.144  | 1.747  |
| ATOM | 2640 | HA   | PHE | 168 | -11.430 | 5.764  | 2.235  |
| ATOM | 2641 | CB   | PHE | 168 | -9.606  | 4.828  | 2.759  |
| ATOM | 2642 | HB2  | PHE | 168 | -10.005 | 4.271  | 3.530  |
| ATOM | 2643 | HB3  | PHE | 168 | -8.873  | 4.247  | 2.325  |
| ATOM | 2644 | CG   | PHE | 168 | -8.964  | 5.995  | 3.344  |
| ATOM | 2645 | CD1  | PHE | 168 | -9.407  | 6.563  | 4.341  |
| ATOM | 2646 | HD1  | PHE | 168 | -10.183 | 6.157  | 4.706  |
| ATOM | 2647 | CE1  | PHE | 168 | -8.849  | 7.667  | 4.853  |
| ATOM | 2648 | HE1  | PHE | 168 | -9.195  | 8.100  | 5.611  |
| ATOM | 2649 | CZ   | PHE | 168 | -7.850  | 8.215  | 4.366  |
| ATOM | 2650 | HZ   | PHE | 168 | -7.435  | 9.068  | 4.753  |
| ATOM | 2651 | CE2  | PHE | 168 | -7.396  | 7.651  | 3.378  |
| ATOM | 2652 | HE2  | PHE | 168 | -6.628  | 8.071  | 3.008  |
| ATOM | 2653 | CD2  | PHE | 168 | -7.946  | 6.539  | 2.871  |
| ATOM | 2654 | HD2  | PHE | 168 | -7.598  | 6.114  | 2.110  |
| ATOM | 2655 | C    | PHE | 168 | -10.158 | 5.940  | 0.566  |
| ATOM | 2656 | O    | PHE | 168 | -10.355 | 7.136  | 0.501  |
| ATOM | 2657 | N    | MET | 169 | -9.538  | 5.289  | -0.405 |
| ATOM | 2658 | H    | MET | 169 | -9.415  | 4.312  | -0.304 |
| ATOM | 2659 | CA   | MET | 169 | -9.052  | 5.943  | -1.615 |
| ATOM | 2660 | HA   | MET | 169 | -8.395  | 6.737  | -1.319 |
| ATOM | 2661 | CB   | MET | 169 | -8.263  | 4.971  | -2.475 |
| ATOM | 2662 | HB2  | MET | 169 | -8.778  | 4.113  | -2.625 |
| ATOM | 2663 | HB3  | MET | 169 | -8.111  | 5.381  | -3.386 |
| ATOM | 2664 | CG   | MET | 169 | -6.975  | 4.611  | -1.949 |
| ATOM | 2665 | HG2  | MET | 169 | -6.819  | 4.896  | -1.427 |
| ATOM | 2666 | HG3  | MET | 169 | -6.951  | 4.011  | -1.773 |
| ATOM | 2667 | SD   | MET | 169 | -5.708  | 4.644  | -2.415 |
| ATOM | 2668 | CE   | MET | 169 | -4.721  | 4.043  | -2.088 |
| ATOM | 2669 | HE1  | MET | 169 | -4.528  | 3.911  | -2.018 |
| ATOM | 2670 | HE2  | MET | 169 | -4.520  | 3.919  | -2.040 |
| ATOM | 2671 | HE3  | MET | 169 | -4.514  | 3.936  | -2.014 |
| ATOM | 2672 | C    | MET | 169 | -10.177 | 6.586  | -2.419 |
| ATOM | 2673 | O    | MET | 169 | -10.014 | 7.682  | -2.915 |
| ATOM | 2674 | N    | LEU | 170 | -11.337 | 5.954  | -2.492 |
| ATOM | 2675 | H    | LEU | 170 | -11.393 | 5.047  | -2.096 |
| ATOM | 2676 | CA   | LEU | 170 | -12.533 | 6.506  | -3.111 |
| ATOM | 2677 | HA   | LEU | 170 | -12.260 | 6.881  | -4.084 |
| ATOM | 2678 | CB   | LEU | 170 | -13.547 | 5.381  | -3.306 |
| ATOM | 2679 | HB2  | LEU | 170 | -13.092 | 4.616  | -3.885 |
| ATOM | 2680 | HB3  | LEU | 170 | -13.776 | 4.959  | -2.360 |
| ATOM | 2681 | CG   | LEU | 170 | -14.850 | 5.767  | -3.972 |
| ATOM | 2682 | HG   | LEU | 170 | -15.312 | 6.416  | -3.414 |
| ATOM | 2683 | CD1  | LEU | 170 | -14.748 | 6.322  | -5.244 |
| ATOM | 2684 | HD11 | LEU | 170 | -14.713 | 6.429  | -5.565 |
| ATOM | 2685 | HD12 | LEU | 170 | -14.785 | 6.474  | -5.563 |
| ATOM | 2686 | HD13 | LEU | 170 | -14.693 | 6.486  | -5.538 |
| ATOM | 2687 | CD2  | LEU | 170 | -15.701 | 4.680  | -4.121 |
| ATOM | 2688 | HD21 | LEU | 170 | -15.900 | 4.423  | -4.149 |
| ATOM | 2689 | HD22 | LEU | 170 | -15.911 | 4.414  | -4.151 |
| ATOM | 2690 | HD23 | LEU | 170 | -15.926 | 4.420  | -4.166 |
| ATOM | 2691 | C    | LEU | 170 | -13.094 | 7.685  | -2.319 |
| ATOM | 2692 | O    | LEU | 170 | -13.269 | 8.740  | -2.866 |
| ATOM | 2693 | N    | HIP | 171 | -13.334 | 7.541  | -1.033 |
| ATOM | 2694 | H    | HIP | 171 | -13.143 | 6.657  | -0.638 |
| ATOM | 2695 | CA   | HIP | 171 | -14.013 | 8.539  | -0.207 |
| ATOM | 2696 | HA   | HIP | 171 | -14.749 | 9.025  | -0.816 |

|      |      |      |     |     |         |        |        |
|------|------|------|-----|-----|---------|--------|--------|
| ATOM | 2697 | CB   | HIP | 171 | -14.761 | 7.849  | 0.912  |
| ATOM | 2698 | HB2  | HIP | 171 | -14.113 | 7.262  | 1.484  |
| ATOM | 2699 | HB3  | HIP | 171 | -15.163 | 8.569  | 1.541  |
| ATOM | 2700 | CG   | HIP | 171 | -15.849 | 7.012  | 0.462  |
| ATOM | 2701 | ND1  | HIP | 171 | -16.072 | 5.831  | 0.552  |
| ATOM | 2702 | HD1  | HIP | 171 | -15.553 | 5.362  | 0.947  |
| ATOM | 2703 | CE1  | HIP | 171 | -17.125 | 5.404  | 0.041  |
| ATOM | 2704 | HE1  | HIP | 171 | -17.540 | 4.511  | -0.015 |
| ATOM | 2705 | NE2  | HIP | 171 | -17.578 | 6.277  | -0.369 |
| ATOM | 2706 | HE2  | HIP | 171 | -18.351 | 6.202  | -0.786 |
| ATOM | 2707 | CD2  | HIP | 171 | -16.793 | 7.291  | -0.110 |
| ATOM | 2708 | HD2  | HIP | 171 | -16.900 | 8.143  | -0.316 |
| ATOM | 2709 | C    | HIP | 171 | -13.134 | 9.675  | 0.285  |
| ATOM | 2710 | O    | HIP | 171 | -13.622 | 10.604 | 0.747  |
| ATOM | 2711 | N    | HIP | 172 | -11.851 | 9.640  | 0.143  |
| ATOM | 2712 | H    | HIP | 172 | -11.516 | 8.816  | -0.183 |
| ATOM | 2713 | CA   | HIP | 172 | -10.906 | 10.718 | 0.444  |
| ATOM | 2714 | HA   | HIP | 172 | -11.463 | 11.526 | 0.882  |
| ATOM | 2715 | CB   | HIP | 172 | -9.902  | 10.257 | 1.499  |
| ATOM | 2716 | HB2  | HIP | 172 | -10.008 | 9.442  | 1.769  |
| ATOM | 2717 | HB3  | HIP | 172 | -9.090  | 10.254 | 1.232  |
| ATOM | 2718 | CG   | HIP | 172 | -9.840  | 10.866 | 2.584  |
| ATOM | 2719 | ND1  | HIP | 172 | -10.236 | 11.333 | 3.457  |
| ATOM | 2720 | HD1  | HIP | 172 | -10.603 | 11.325 | 3.479  |
| ATOM | 2721 | CE1  | HIP | 172 | -10.078 | 11.825 | 4.244  |
| ATOM | 2722 | HE1  | HIP | 172 | -10.327 | 12.278 | 5.002  |
| ATOM | 2723 | NE2  | HIP | 172 | -9.586  | 11.679 | 3.899  |
| ATOM | 2724 | HE2  | HIP | 172 | -9.401  | 11.986 | 4.304  |
| ATOM | 2725 | CD2  | HIP | 172 | -9.430  | 11.079 | 2.861  |
| ATOM | 2726 | HD2  | HIP | 172 | -9.079  | 10.842 | 2.345  |
| ATOM | 2727 | C    | HIP | 172 | -10.273 | 11.333 | -0.800 |
| ATOM | 2728 | O    | HIP | 172 | -9.189  | 11.772 | -0.769 |
| ATOM | 2729 | N    | CYS | 173 | -10.939 | 11.347 | -1.906 |
| ATOM | 2730 | H    | CYS | 173 | -11.826 | 11.000 | -1.842 |
| ATOM | 2731 | CA   | CYS | 173 | -10.570 | 11.963 | -3.177 |
| ATOM | 2732 | HA   | CYS | 173 | -11.330 | 11.691 | -3.873 |
| ATOM | 2733 | CB   | CYS | 173 | -10.665 | 13.462 | -3.064 |
| ATOM | 2734 | HB2  | CYS | 173 | -10.088 | 13.822 | -2.392 |
| ATOM | 2735 | HB3  | CYS | 173 | -10.412 | 13.895 | -3.882 |
| ATOM | 2736 | SG   | CYS | 173 | -12.140 | 13.961 | -2.721 |
| ATOM | 2737 | HG   | CYS | 173 | -12.182 | 14.396 | -2.608 |
| ATOM | 2738 | C    | CYS | 173 | -9.276  | 11.487 | -3.840 |
| ATOM | 2739 | O    | CYS | 173 | -8.822  | 12.105 | -4.767 |
| ATOM | 2740 | N    | ILE | 174 | -8.677  | 10.386 | -3.418 |
| ATOM | 2741 | H    | ILE | 174 | -9.101  | 9.889  | -2.695 |
| ATOM | 2742 | CA   | ILE | 174 | -7.419  | 9.876  | -3.966 |
| ATOM | 2743 | HA   | ILE | 174 | -6.776  | 10.716 | -4.161 |
| ATOM | 2744 | CB   | ILE | 174 | -6.689  | 8.969  | -2.963 |
| ATOM | 2745 | HB   | ILE | 174 | -7.271  | 8.100  | -2.816 |
| ATOM | 2746 | CG2  | ILE | 174 | -5.361  | 8.531  | -3.512 |
| ATOM | 2747 | HG21 | ILE | 174 | -5.013  | 8.438  | -3.616 |
| ATOM | 2748 | HG22 | ILE | 174 | -5.038  | 8.375  | -3.646 |
| ATOM | 2749 | HG23 | ILE | 174 | -5.051  | 8.443  | -3.677 |
| ATOM | 2750 | CG1  | ILE | 174 | -6.497  | 9.625  | -1.618 |
| ATOM | 2751 | HG12 | ILE | 174 | -5.990  | 10.253 | -1.655 |
| ATOM | 2752 | HG13 | ILE | 174 | -7.189  | 9.944  | -1.330 |
| ATOM | 2753 | CD1  | ILE | 174 | -6.096  | 9.041  | -0.550 |
| ATOM | 2754 | HD11 | ILE | 174 | -6.033  | 8.923  | -0.280 |
| ATOM | 2755 | HD12 | ILE | 174 | -6.003  | 8.875  | -0.296 |
| ATOM | 2756 | HD13 | ILE | 174 | -5.965  | 8.924  | -0.279 |
| ATOM | 2757 | C    | ILE | 174 | -7.649  | 9.186  | -5.304 |
| ATOM | 2758 | O    | ILE | 174 | -6.892  | 9.396  | -6.231 |
| ATOM | 2759 | N    | ALA | 175 | -8.728  | 8.430  | -5.458 |
| ATOM | 2760 | H    | ALA | 175 | -9.330  | 8.301  | -4.680 |
| ATOM | 2761 | CA   | ALA | 175 | -9.098  | 7.831  | -6.729 |
| ATOM | 2762 | HA   | ALA | 175 | -8.253  | 7.276  | -7.097 |
| ATOM | 2763 | CB   | ALA | 175 | -10.229 | 6.842  | -6.504 |
| ATOM | 2764 | HB1  | ALA | 175 | -10.429 | 6.528  | -6.439 |
| ATOM | 2765 | HB2  | ALA | 175 | -10.533 | 6.659  | -6.378 |
| ATOM | 2766 | HB3  | ALA | 175 | -10.543 | 6.610  | -6.550 |
| ATOM | 2767 | C    | ALA | 175 | -9.436  | 8.887  | -7.789 |
| ATOM | 2768 | O    | ALA | 175 | -9.075  | 8.724  | -8.935 |
| ATOM | 2769 | N    | ARG | 176 | -10.027 | 10.014 | -7.404 |
| ATOM | 2770 | H    | ARG | 176 | -10.369 | 10.043 | -6.477 |
| ATOM | 2771 | CA   | ARG | 176 | -10.233 | 11.191 | -8.257 |
| ATOM | 2772 | HA   | ARG | 176 | -10.720 | 10.872 | -9.162 |
| ATOM | 2773 | CB   | ARG | 176 | -11.150 | 12.175 | -7.544 |
| ATOM | 2774 | HB2  | ARG | 176 | -11.914 | 11.740 | -7.232 |
| ATOM | 2775 | HB3  | ARG | 176 | -10.735 | 12.534 | -6.799 |
| ATOM | 2776 | CG   | ARG | 176 | -11.636 | 13.244 | -8.240 |
| ATOM | 2777 | HG2  | ARG | 176 | -10.922 | 13.695 | -8.533 |
| ATOM | 2778 | HG3  | ARG | 176 | -12.035 | 12.914 | -8.961 |
| ATOM | 2779 | CD   | ARG | 176 | -12.546 | 14.167 | -7.558 |
| ATOM | 2780 | HD2  | ARG | 176 | -12.099 | 14.537 | -6.844 |
| ATOM | 2781 | HD3  | ARG | 176 | -12.805 | 14.875 | -8.104 |
| ATOM | 2782 | NE   | ARG | 176 | -13.646 | 13.654 | -7.143 |
| ATOM | 2783 | HE   | ARG | 176 | -13.786 | 12.878 | -7.408 |
| ATOM | 2784 | CZ   | ARG | 176 | -14.484 | 14.079 | -6.452 |
| ATOM | 2785 | NH1  | ARG | 176 | -14.496 | 15.089 | -6.038 |
| ATOM | 2786 | HH11 | ARG | 176 | -13.860 | 15.589 | -6.245 |
| ATOM | 2787 | HH12 | ARG | 176 | -15.157 | 15.363 | -5.520 |
| ATOM | 2788 | NH2  | ARG | 176 | -15.347 | 13.466 | -6.165 |
| ATOM | 2789 | HH21 | ARG | 176 | -15.335 | 12.677 | -6.480 |
| ATOM | 2790 | HH22 | ARG | 176 | -15.990 | 13.771 | -5.646 |
| ATOM | 2791 | C    | ARG | 176 | -8.928  | 11.841 | -8.686 |
| ATOM | 2792 | O    | ARG | 176 | -8.787  | 12.182 | -9.840 |
| ATOM | 2793 | N    | TRP | 177 | -7.949  | 11.944 | -7.802 |
| ATOM | 2794 | H    | TRP | 177 | -8.139  | 11.668 | -6.871 |
| ATOM | 2795 | CA   | TRP | 177 | -6.622  | 12.460 | -8.118 |
| ATOM | 2796 | HA   | TRP | 177 | -6.735  | 13.427 | -8.580 |
| ATOM | 2797 | CB   | TRP | 177 | -5.831  | 12.649 | -6.832 |
| ATOM | 2798 | HB2  | TRP | 177 | -6.424  | 13.212 | -6.155 |
| ATOM | 2799 | HB3  | TRP | 177 | -5.652  | 11.702 | -6.378 |
| ATOM | 2800 | CG   | TRP | 177 | -4.532  | 13.334 | -6.966 |
| ATOM | 2801 | CD1  | TRP | 177 | -4.353  | 14.626 | -6.985 |

|      |      |      |     |     |         |        |         |
|------|------|------|-----|-----|---------|--------|---------|
| ATOM | 2802 | HD1  | TRP | 177 | -5.126  | 15.320 | -6.902  |
| ATOM | 2803 | NE1  | TRP | 177 | -3.037  | 14.918 | -7.121  |
| ATOM | 2804 | HE1  | TRP | 177 | -2.683  | 15.822 | -7.152  |
| ATOM | 2805 | CE2  | TRP | 177 | -2.293  | 13.821 | -7.195  |
| ATOM | 2806 | CZ2  | TRP | 177 | -0.948  | 13.616 | -7.346  |
| ATOM | 2807 | HZ2  | TRP | 177 | -0.284  | 14.423 | -7.429  |
| ATOM | 2808 | CH2  | TRP | 177 | -0.490  | 12.350 | -7.410  |
| ATOM | 2809 | HH2  | TRP | 177 | 0.536   | 12.180 | -7.549  |
| ATOM | 2810 | CZ3  | TRP | 177 | -1.371  | 11.308 | -7.301  |
| ATOM | 2811 | HZ3  | TRP | 177 | -1.014  | 10.341 | -7.346  |
| ATOM | 2812 | CE3  | TRP | 177 | -2.720  | 11.525 | -7.141  |
| ATOM | 2813 | HE3  | TRP | 177 | -3.388  | 10.724 | -7.054  |
| ATOM | 2814 | CD2  | TRP | 177 | -3.220  | 12.787 | -7.095  |
| ATOM | 2815 | C    | TRP | 177 | -5.880  | 11.577 | -9.117  |
| ATOM | 2816 | O    | TRP | 177 | -5.275  | 12.082 | -10.037 |
| ATOM | 2817 | N    | ILE | 178 | -5.990  | 10.262 | -9.001  |
| ATOM | 2818 | H    | ILE | 178 | -6.468  | 9.913  | -8.208  |
| ATOM | 2819 | CA   | ILE | 178 | -5.435  | 9.305  | -9.958  |
| ATOM | 2820 | HA   | ILE | 178 | -4.432  | 9.613  | -10.189 |
| ATOM | 2821 | CB   | ILE | 178 | -5.346  | 7.908  | -9.336  |
| ATOM | 2822 | HB   | ILE | 178 | -6.219  | 7.672  | -9.028  |
| ATOM | 2823 | CG2  | ILE | 178 | -4.948  | 6.912  | -10.208 |
| ATOM | 2824 | HG21 | ILE | 178 | -4.902  | 6.698  | -10.449 |
| ATOM | 2825 | HG22 | ILE | 178 | -4.785  | 6.641  | -10.409 |
| ATOM | 2826 | HG23 | ILE | 178 | -4.877  | 6.647  | -10.410 |
| ATOM | 2827 | CG1  | ILE | 178 | -4.499  | 7.798  | -8.222  |
| ATOM | 2828 | HG12 | ILE | 178 | -3.979  | 8.107  | -8.185  |
| ATOM | 2829 | HG13 | ILE | 178 | -4.720  | 8.038  | -7.734  |
| ATOM | 2830 | CD1  | ILE | 178 | -4.052  | 6.968  | -7.741  |
| ATOM | 2831 | HD11 | ILE | 178 | -3.940  | 6.777  | -7.604  |
| ATOM | 2832 | HD12 | ILE | 178 | -3.940  | 6.752  | -7.626  |
| ATOM | 2833 | HD13 | ILE | 178 | -3.937  | 6.777  | -7.626  |
| ATOM | 2834 | C    | ILE | 178 | -6.198  | 9.328  | -11.286 |
| ATOM | 2835 | O    | ILE | 178 | -5.578  | 9.274  | -12.331 |
| ATOM | 2836 | N    | ALA | 179 | -7.514  | 9.491  | -11.283 |
| ATOM | 2837 | H    | ALA | 179 | -7.989  | 9.492  | -10.412 |
| ATOM | 2838 | CA   | ALA | 179 | -8.309  | 9.654  | -12.492 |
| ATOM | 2839 | HA   | ALA | 179 | -8.121  | 8.814  | -13.138 |
| ATOM | 2840 | CB   | ALA | 179 | -9.783  | 9.646  | -12.133 |
| ATOM | 2841 | HB1  | ALA | 179 | -10.137 | 9.596  | -12.035 |
| ATOM | 2842 | HB2  | ALA | 179 | -10.136 | 9.685  | -12.021 |
| ATOM | 2843 | HB3  | ALA | 179 | -10.159 | 9.651  | -12.102 |
| ATOM | 2844 | C    | ALA | 179 | -7.934  | 10.914 | -13.272 |
| ATOM | 2845 | O    | ALA | 179 | -7.808  | 10.868 | -14.473 |
| ATOM | 2846 | N    | GLN | 180 | -7.659  | 12.014 | -12.595 |
| ATOM | 2847 | H    | GLN | 180 | -7.822  | 12.001 | -11.621 |
| ATOM | 2848 | CA   | GLN | 180 | -7.165  | 13.250 | -13.189 |
| ATOM | 2849 | HA   | GLN | 180 | -7.770  | 13.480 | -14.043 |
| ATOM | 2850 | CB   | GLN | 180 | -7.318  | 14.382 | -12.194 |
| ATOM | 2851 | HB2  | GLN | 180 | -7.079  | 14.196 | -11.436 |
| ATOM | 2852 | HB3  | GLN | 180 | -6.872  | 15.048 | -12.365 |
| ATOM | 2853 | CG   | GLN | 180 | -8.392  | 14.897 | -11.995 |
| ATOM | 2854 | HG2  | GLN | 180 | -8.651  | 15.168 | -12.610 |
| ATOM | 2855 | HG3  | GLN | 180 | -8.806  | 14.314 | -11.845 |
| ATOM | 2856 | CD   | GLN | 180 | -8.596  | 15.842 | -11.174 |
| ATOM | 2857 | OE1  | GLN | 180 | -8.112  | 16.153 | -10.634 |
| ATOM | 2858 | NE2  | GLN | 180 | -9.325  | 16.335 | -11.043 |
| ATOM | 2859 | HE21 | GLN | 180 | -9.458  | 16.958 | -10.515 |
| ATOM | 2860 | HE22 | GLN | 180 | -9.731  | 16.099 | -11.479 |
| ATOM | 2861 | C    | GLN | 180 | -5.732  | 13.141 | -13.704 |
| ATOM | 2862 | O    | GLN | 180 | -5.339  | 13.899 | -14.530 |
| ATOM | 2863 | N    | ARG | 181 | -4.964  | 12.168 | -13.270 |
| ATOM | 2864 | H    | ARG | 181 | -5.336  | 11.624 | -12.556 |
| ATOM | 2865 | CA   | ARG | 181 | -3.642  | 11.802 | -13.777 |
| ATOM | 2866 | HA   | ARG | 181 | -3.206  | 12.652 | -14.249 |
| ATOM | 2867 | CB   | ARG | 181 | -2.755  | 11.407 | -12.625 |
| ATOM | 2868 | HB2  | ARG | 181 | -3.143  | 11.103 | -11.930 |
| ATOM | 2869 | HB3  | ARG | 181 | -2.240  | 10.805 | -12.825 |
| ATOM | 2870 | CG   | ARG | 181 | -2.015  | 12.208 | -12.118 |
| ATOM | 2871 | HG2  | ARG | 181 | -1.685  | 12.282 | -12.260 |
| ATOM | 2872 | HG3  | ARG | 181 | -2.208  | 12.471 | -12.178 |
| ATOM | 2873 | CD   | ARG | 181 | -1.441  | 12.538 | -11.307 |
| ATOM | 2874 | HD2  | ARG | 181 | -1.642  | 12.527 | -10.769 |
| ATOM | 2875 | HD3  | ARG | 181 | -1.107  | 12.238 | -11.278 |
| ATOM | 2876 | NE   | ARG | 181 | -1.053  | 13.262 | -11.261 |
| ATOM | 2877 | HE   | ARG | 181 | -0.864  | 13.269 | -11.447 |
| ATOM | 2878 | CZ   | ARG | 181 | -0.903  | 13.929 | -10.992 |
| ATOM | 2879 | NH1  | ARG | 181 | -0.547  | 14.529 | -11.000 |
| ATOM | 2880 | HH11 | ARG | 181 | -0.384  | 14.484 | -11.211 |
| ATOM | 2881 | HH12 | ARG | 181 | -0.433  | 15.035 | -10.804 |
| ATOM | 2882 | NH2  | ARG | 181 | -1.097  | 14.022 | -10.716 |
| ATOM | 2883 | HH21 | ARG | 181 | -1.366  | 13.575 | -10.690 |
| ATOM | 2884 | HH22 | ARG | 181 | -0.959  | 14.544 | -10.514 |
| ATOM | 2885 | C    | ARG | 181 | -3.676  | 10.752 | -14.864 |
| ATOM | 2886 | O    | ARG | 181 | -2.683  | 10.394 | -15.348 |
| ATOM | 2887 | N    | GLY | 182 | -4.806  | 10.284 | -15.271 |
| ATOM | 2888 | H    | GLY | 182 | -5.573  | 10.634 | -14.832 |
| ATOM | 2889 | CA   | GLY | 182 | -5.013  | 9.348  | -16.353 |
| ATOM | 2890 | HA2  | GLY | 182 | -5.891  | 9.624  | -16.858 |
| ATOM | 2891 | HA3  | GLY | 182 | -4.215  | 9.414  | -17.042 |
| ATOM | 2892 | C    | GLY | 182 | -5.168  | 7.905  | -15.966 |
| ATOM | 2893 | O    | GLY | 182 | -5.115  | 7.063  | -16.818 |
| ATOM | 2894 | N    | GLY | 183 | -5.351  | 7.602  | -14.706 |
| ATOM | 2895 | H    | GLY | 183 | -5.361  | 8.335  | -14.056 |
| ATOM | 2896 | CA   | GLY | 183 | -5.433  | 6.255  | -14.182 |
| ATOM | 2897 | HA2  | GLY | 183 | -6.056  | 6.249  | -13.324 |
| ATOM | 2898 | HA3  | GLY | 183 | -5.882  | 5.622  | -14.899 |
| ATOM | 2899 | C    | GLY | 183 | -4.108  | 5.658  | -13.797 |
| ATOM | 2900 | O    | GLY | 183 | -3.082  | 6.257  | -13.982 |
| ATOM | 2901 | N    | TRP | 184 | -4.116  | 4.463  | -13.252 |
| ATOM | 2902 | H    | TRP | 184 | -4.979  | 4.003  | -13.163 |
| ATOM | 2903 | CA   | TRP | 184 | -2.947  | 3.811  | -12.705 |
| ATOM | 2904 | HA   | TRP | 184 | -2.517  | 4.462  | -11.986 |
| ATOM | 2905 | CB   | TRP | 184 | -3.345  | 2.540  | -11.975 |
| ATOM | 2906 | HB2  | TRP | 184 | -4.083  | 2.034  | -12.527 |

|      |      |      |     |     |        |        |         |
|------|------|------|-----|-----|--------|--------|---------|
| ATOM | 2907 | HB3  | TRP | 184 | -2.509 | 1.899  | -11.923 |
| ATOM | 2908 | CG   | TRP | 184 | -3.812 | 2.721  | -10.596 |
| ATOM | 2909 | CD1  | TRP | 184 | -5.066 | 2.676  | -10.190 |
| ATOM | 2910 | HD1  | TRP | 184 | -5.890 | 2.500  | -10.816 |
| ATOM | 2911 | NE1  | TRP | 184 | -5.121 | 2.878  | -8.856  |
| ATOM | 2912 | HE1  | TRP | 184 | -5.955 | 2.862  | -8.337  |
| ATOM | 2913 | CE2  | TRP | 184 | -3.898 | 3.059  | -8.328  |
| ATOM | 2914 | CZ2  | TRP | 184 | -3.453 | 3.293  | -7.054  |
| ATOM | 2915 | HZ2  | TRP | 184 | -4.137 | 3.374  | -6.262  |
| ATOM | 2916 | CH2  | TRP | 184 | -2.108 | 3.423  | -6.832  |
| ATOM | 2917 | HH2  | TRP | 184 | -1.748 | 3.600  | -5.862  |
| ATOM | 2918 | CZ3  | TRP | 184 | -1.231 | 3.320  | -7.883  |
| ATOM | 2919 | HZ3  | TRP | 184 | -0.203 | 3.415  | -7.705  |
| ATOM | 2920 | CE3  | TRP | 184 | -1.689 | 3.096  | -9.161  |
| ATOM | 2921 | HE3  | TRP | 184 | -1.008 | 3.020  | -9.958  |
| ATOM | 2922 | CD2  | TRP | 184 | -3.035 | 2.960  | -9.419  |
| ATOM | 2923 | C    | TRP | 184 | -1.862 | 3.540  | -13.712 |
| ATOM | 2924 | O    | TRP | 184 | -0.737 | 3.604  | -13.374 |
| ATOM | 2925 | N    | VAL | 185 | -2.167 | 3.300  | -14.949 |
| ATOM | 2926 | H    | VAL | 185 | -3.103 | 3.274  | -15.168 |
| ATOM | 2927 | CA   | VAL | 185 | -1.191 | 3.102  | -16.002 |
| ATOM | 2928 | HA   | VAL | 185 | -0.474 | 2.430  | -15.640 |
| ATOM | 2929 | CB   | VAL | 185 | -1.803 | 2.487  | -17.207 |
| ATOM | 2930 | HB   | VAL | 185 | -2.018 | 2.677  | -17.682 |
| ATOM | 2931 | CG1  | VAL | 185 | -1.560 | 1.985  | -17.744 |
| ATOM | 2932 | HG11 | VAL | 185 | -1.485 | 1.796  | -17.867 |
| ATOM | 2933 | HG12 | VAL | 185 | -1.532 | 1.888  | -17.923 |
| ATOM | 2934 | HG13 | VAL | 185 | -1.493 | 1.901  | -17.854 |
| ATOM | 2935 | CG2  | VAL | 185 | -2.376 | 2.050  | -17.297 |
| ATOM | 2936 | HG21 | VAL | 185 | -2.507 | 1.912  | -17.345 |
| ATOM | 2937 | HG22 | VAL | 185 | -2.515 | 1.956  | -17.320 |
| ATOM | 2938 | HG23 | VAL | 185 | -2.534 | 1.957  | -17.314 |
| ATOM | 2939 | C    | VAL | 185 | -0.455 | 4.358  | -16.379 |
| ATOM | 2940 | O    | VAL | 185 | 0.639  | 4.344  | -16.719 |
| ATOM | 2941 | N    | ALA | 186 | -1.026 | 5.452  | -16.266 |
| ATOM | 2942 | H    | ALA | 186 | -1.923 | 5.404  | -15.984 |
| ATOM | 2943 | CA   | ALA | 186 | -0.424 | 6.724  | -16.514 |
| ATOM | 2944 | HA   | ALA | 186 | 0.325  | 6.614  | -17.245 |
| ATOM | 2945 | CB   | ALA | 186 | -1.452 | 7.619  | -17.069 |
| ATOM | 2946 | HB1  | ALA | 186 | -1.694 | 7.879  | -17.092 |
| ATOM | 2947 | HB2  | ALA | 186 | -1.628 | 7.882  | -17.289 |
| ATOM | 2948 | HB3  | ALA | 186 | -1.772 | 7.750  | -17.227 |
| ATOM | 2949 | C    | ALA | 186 | 0.232  | 7.318  | -15.303 |
| ATOM | 2950 | O    | ALA | 186 | 1.209  | 7.989  | -15.421 |
| ATOM | 2951 | N    | ALA | 187 | -0.257 | 7.043  | -14.138 |
| ATOM | 2952 | H    | ALA | 187 | -1.083 | 6.531  | -14.105 |
| ATOM | 2953 | CA   | ALA | 187 | 0.282  | 7.535  | -12.925 |
| ATOM | 2954 | HA   | ALA | 187 | 0.422  | 8.572  | -13.036 |
| ATOM | 2955 | CB   | ALA | 187 | -0.712 | 7.301  | -11.838 |
| ATOM | 2956 | HB1  | ALA | 187 | -0.897 | 7.240  | -11.541 |
| ATOM | 2957 | HB2  | ALA | 187 | -0.975 | 7.299  | -11.581 |
| ATOM | 2958 | HB3  | ALA | 187 | -0.975 | 7.203  | -11.597 |
| ATOM | 2959 | C    | ALA | 187 | 1.613  | 6.970  | -12.581 |
| ATOM | 2960 | O    | ALA | 187 | 2.384  | 7.610  | -11.995 |
| ATOM | 2961 | N    | LEU | 188 | 1.914  | 5.807  | -12.990 |
| ATOM | 2962 | H    | LEU | 188 | 1.233  | 5.322  | -13.432 |
| ATOM | 2963 | CA   | LEU | 188 | 3.178  | 5.192  | -12.830 |
| ATOM | 2964 | HA   | LEU | 188 | 3.520  | 5.389  | -11.932 |
| ATOM | 2965 | CB   | LEU | 188 | 3.006  | 3.810  | -12.908 |
| ATOM | 2966 | HB2  | LEU | 188 | 2.352  | 3.535  | -12.475 |
| ATOM | 2967 | HB3  | LEU | 188 | 2.822  | 3.603  | -13.648 |
| ATOM | 2968 | CG   | LEU | 188 | 3.911  | 3.041  | -12.597 |
| ATOM | 2969 | HG   | LEU | 188 | 4.454  | 3.292  | -13.066 |
| ATOM | 2970 | CD1  | LEU | 188 | 4.272  | 2.933  | -11.569 |
| ATOM | 2971 | HD11 | LEU | 188 | 4.344  | 2.910  | -11.324 |
| ATOM | 2972 | HD12 | LEU | 188 | 4.382  | 2.895  | -11.333 |
| ATOM | 2973 | HD13 | LEU | 188 | 4.370  | 2.909  | -11.305 |
| ATOM | 2974 | CD2  | LEU | 188 | 3.733  | 1.963  | -12.685 |
| ATOM | 2975 | HD21 | LEU | 188 | 3.682  | 1.693  | -12.729 |
| ATOM | 2976 | HD22 | LEU | 188 | 3.689  | 1.713  | -12.710 |
| ATOM | 2977 | HD23 | LEU | 188 | 3.712  | 1.697  | -12.690 |
| ATOM | 2978 | C    | LEU | 188 | 4.195  | 5.657  | -13.728 |
| ATOM | 2979 | O    | LEU | 188 | 5.238  | 5.587  | -13.486 |
| ATOM | 2980 | N    | ASN | 189 | 3.905  | 6.162  | -14.742 |
| ATOM | 2981 | H    | ASN | 189 | 3.039  | 6.189  | -14.888 |
| ATOM | 2982 | CA   | ASN | 189 | 4.769  | 6.673  | -15.645 |
| ATOM | 2983 | HA   | ASN | 189 | 5.589  | 6.236  | -15.601 |
| ATOM | 2984 | CB   | ASN | 189 | 4.328  | 6.511  | -16.841 |
| ATOM | 2985 | HB2  | ASN | 189 | 4.007  | 5.799  | -16.921 |
| ATOM | 2986 | HB3  | ASN | 189 | 3.726  | 6.991  | -16.992 |
| ATOM | 2987 | CG   | ASN | 189 | 5.116  | 6.644  | -17.751 |
| ATOM | 2988 | OD1  | ASN | 189 | 5.658  | 6.784  | -17.956 |
| ATOM | 2989 | ND2  | ASN | 189 | 5.206  | 6.597  | -18.326 |
| ATOM | 2990 | HD21 | ASN | 189 | 5.720  | 6.679  | -18.923 |
| ATOM | 2991 | HD22 | ASN | 189 | 4.766  | 6.476  | -18.168 |
| ATOM | 2992 | C    | ASN | 189 | 5.048  | 7.897  | -15.469 |
| ATOM | 2993 | O    | ASN | 189 | 5.679  | 8.402  | -15.805 |
| ATOM | 2994 | N    | LEU | 190 | 4.593  | 8.375  | -14.937 |
| ATOM | 2995 | H    | LEU | 190 | 4.083  | 7.913  | -14.690 |
| ATOM | 2996 | CA   | LEU | 190 | 4.776  | 9.513  | -14.697 |
| ATOM | 2997 | HA   | LEU | 190 | 5.052  | 9.953  | -15.109 |
| ATOM | 2998 | CB   | LEU | 190 | 3.985  | 9.916  | -14.465 |
| ATOM | 2999 | HB2  | LEU | 190 | 3.619  | 9.505  | -14.572 |
| ATOM | 3000 | HB3  | LEU | 190 | 3.886  | 9.987  | -14.074 |
| ATOM | 3001 | CG   | LEU | 190 | 3.789  | 10.748 | -14.598 |
| ATOM | 3002 | HG   | LEU | 190 | 3.970  | 10.674 | -14.520 |
| ATOM | 3003 | CD1  | LEU | 190 | 3.629  | 11.160 | -14.787 |
| ATOM | 3004 | HD11 | LEU | 190 | 3.617  | 11.256 | -14.878 |
| ATOM | 3005 | HD12 | LEU | 190 | 3.594  | 11.236 | -14.791 |
| ATOM | 3006 | HD13 | LEU | 190 | 3.561  | 11.294 | -14.829 |
| ATOM | 3007 | CD2  | LEU | 190 | 3.468  | 11.293 | -14.637 |
| ATOM | 3008 | HD21 | LEU | 190 | 3.385  | 11.455 | -14.660 |
| ATOM | 3009 | HD22 | LEU | 190 | 3.405  | 11.409 | -14.608 |
| ATOM | 3010 | HD23 | LEU | 190 | 3.380  | 11.413 | -14.674 |
| ATOM | 3011 | C    | LEU | 190 | 5.388  | 9.712  | -14.146 |

ATOM 3012 O LEU 190 5.430 9.651 -13.737  
END

DATASET 52

HEADER APOPTOSIS 28-JUN-10 XXXX  
TITLE 3D MODEL OF BAK IN COMPLEX WITH THE BH3 DOMAIN OF NOXA  
COMPND MOLECULE: APOPTOSIS REGULATOR BAK;  
COMPND 2 SYNONYM: BCL-2 HOMOLOGOUS ANTAGONIST/KILLER, BCL-2- LIKE 7  
COMPND 3 PROTEIN;  
SOURCE MOLECULE 1 (RESIDUES 1-27): NOXA;  
SOURCE 2 NCBI ACCESSION: Q13794;  
SOURCE 3 ORGANISM\_SCIENTIFIC: HOMO SAPIENS;  
SOURCE 4 ORGANISM\_COMMON: HUMAN;  
SOURCE 5 MOLECULE 2 (RESIDUES 28-190): BAK;  
SOURCE 6 NCBI ACCESSION: Q16611;  
SOURCE 7 ORGANISM\_SCIENTIFIC: HOMO SAPIENS;  
SOURCE 8 ORGANISM\_COMMON: HUMAN;  
KEYWDS HETERODIMER, APOPTOSIS  
EXPDTA THEORETICAL MODEL  
JRNL AUTH Y-P PANG, H DAI, A SMITH, XW MENG, PA SCHNEIDER, SH KAUFMANN  
JRNL TITL BAK CONFORMATIONAL CHANGES INDUCED BY LIGAND BINDING;  
JRNL TITL 2 INSIGHT INTO BH3 DOMAIN BINDING AND BAK HOMO-OLIGOMERIZATION  
JRNL REF SCIENTIFIC REPORTS, SUBMITTED  
REMARK 220 THIS IS AN ENERGY\_MINIMIZED AVERAGE OF 5100 SIMILAR  
REMARK 220 CONFORMERS IDENTIFIED BY CLUSTER ANALYSIS OF 52  
REMARK 220 10-NS MOLECULAR DYNAMICS SIMULATIONS OF  
REMARK 220 BAK\*NOXA USING PMEMD WITH THE FF99SB FORCE FIELD.

MOL 1

|      |    |      |     |   |        |        |        |      |      |   |
|------|----|------|-----|---|--------|--------|--------|------|------|---|
| ATOM | 1  | N    | ALA | 1 | -3.843 | 9.628  | 22.125 | 0.00 | 0.00 | N |
| ATOM | 2  | CA   | ALA | 1 | -3.952 | 9.619  | 20.673 | 0.00 | 0.00 | C |
| ATOM | 3  | C    | ALA | 1 | -2.794 | 10.358 | 19.980 | 0.00 | 0.00 | C |
| ATOM | 4  | O    | ALA | 1 | -2.775 | 10.428 | 18.752 | 0.00 | 0.00 | O |
| ATOM | 5  | CB   | ALA | 1 | -5.309 | 10.212 | 20.272 | 0.00 | 0.00 | C |
| ATOM | 6  | H    | ALA | 1 | -3.636 | 10.507 | 22.579 | 0.00 | 0.00 | H |
| ATOM | 7  | HA   | ALA | 1 | -3.925 | 8.578  | 20.349 | 0.00 | 0.00 | H |
| ATOM | 8  | 1HB  | ALA | 1 | -5.356 | 11.261 | 20.567 | 0.00 | 0.00 | H |
| ATOM | 9  | 2HB  | ALA | 1 | -6.112 | 9.662  | 20.763 | 0.00 | 0.00 | H |
| ATOM | 10 | 3HB  | ALA | 1 | -5.442 | 10.135 | 19.193 | 0.00 | 0.00 | H |
| ATOM | 11 | N    | GLU | 2 | -1.833 | 10.899 | 20.747 | 0.00 | 0.00 | N |
| ATOM | 12 | CA   | GLU | 2 | -0.689 | 11.652 | 20.236 | 0.00 | 0.00 | C |
| ATOM | 13 | C    | GLU | 2 | 0.389  | 10.732 | 19.638 | 0.00 | 0.00 | C |
| ATOM | 14 | O    | GLU | 2 | 1.256  | 11.215 | 18.913 | 0.00 | 0.00 | O |
| ATOM | 15 | CB   | GLU | 2 | -0.101 | 12.534 | 21.353 | 0.00 | 0.00 | C |
| ATOM | 16 | CG   | GLU | 2 | -0.992 | 13.724 | 21.751 | 0.00 | 0.00 | C |
| ATOM | 17 | CD   | GLU | 2 | -2.285 | 13.318 | 22.463 | 0.00 | 0.00 | C |
| ATOM | 18 | OE1  | GLU | 2 | -3.359 | 13.497 | 21.849 | 0.00 | 0.00 | O |
| ATOM | 19 | OE2  | GLU | 2 | -2.178 | 12.827 | 23.609 | 0.00 | 0.00 | O |
| ATOM | 20 | H    | GLU | 2 | -1.904 | 10.808 | 21.750 | 0.00 | 0.00 | H |
| ATOM | 21 | HA   | GLU | 2 | -1.042 | 12.310 | 19.439 | 0.00 | 0.00 | H |
| ATOM | 22 | 2HB  | GLU | 2 | 0.846  | 12.945 | 21.000 | 0.00 | 0.00 | H |
| ATOM | 23 | 3HB  | GLU | 2 | 0.112  | 11.921 | 22.231 | 0.00 | 0.00 | H |
| ATOM | 24 | 2HG  | GLU | 2 | -0.422 | 14.370 | 22.421 | 0.00 | 0.00 | H |
| ATOM | 25 | 3HG  | GLU | 2 | -1.230 | 14.304 | 20.857 | 0.00 | 0.00 | H |
| ATOM | 26 | N    | LEU | 3 | 0.315  | 9.418  | 19.905 | 0.00 | 0.00 | N |
| ATOM | 27 | CA   | LEU | 3 | 1.134  | 8.389  | 19.271 | 0.00 | 0.00 | C |
| ATOM | 28 | C    | LEU | 3 | 0.626  | 8.076  | 17.852 | 0.00 | 0.00 | C |
| ATOM | 29 | O    | LEU | 3 | 1.408  | 7.640  | 17.010 | 0.00 | 0.00 | O |
| ATOM | 30 | CB   | LEU | 3 | 1.105  | 7.145  | 20.177 | 0.00 | 0.00 | C |
| ATOM | 31 | CG   | LEU | 3 | 1.967  | 5.953  | 19.710 | 0.00 | 0.00 | C |
| ATOM | 32 | CD1  | LEU | 3 | 3.452  | 6.322  | 19.567 | 0.00 | 0.00 | C |
| ATOM | 33 | CD2  | LEU | 3 | 1.810  | 4.804  | 20.716 | 0.00 | 0.00 | C |
| ATOM | 34 | H    | LEU | 3 | -0.417 | 9.093  | 20.520 | 0.00 | 0.00 | H |
| ATOM | 35 | HA   | LEU | 3 | 2.158  | 8.759  | 19.207 | 0.00 | 0.00 | H |
| ATOM | 36 | 2HB  | LEU | 3 | 1.440  | 7.442  | 21.173 | 0.00 | 0.00 | H |
| ATOM | 37 | 3HB  | LEU | 3 | 0.069  | 6.809  | 20.262 | 0.00 | 0.00 | H |
| ATOM | 38 | HG   | LEU | 3 | 1.601  | 5.600  | 18.745 | 0.00 | 0.00 | H |
| ATOM | 39 | 1HD1 | LEU | 3 | 4.031  | 5.435  | 19.314 | 0.00 | 0.00 | H |
| ATOM | 40 | 2HD1 | LEU | 3 | 3.829  | 6.739  | 20.501 | 0.00 | 0.00 | H |
| ATOM | 41 | 3HD1 | LEU | 3 | 3.584  | 7.051  | 18.768 | 0.00 | 0.00 | H |
| ATOM | 42 | 1HD2 | LEU | 3 | 2.171  | 5.111  | 21.699 | 0.00 | 0.00 | H |
| ATOM | 43 | 2HD2 | LEU | 3 | 0.761  | 4.518  | 20.793 | 0.00 | 0.00 | H |
| ATOM | 44 | 3HD2 | LEU | 3 | 2.381  | 3.938  | 20.384 | 0.00 | 0.00 | H |
| ATOM | 45 | N    | GLU | 4 | -0.663 | 8.327  | 17.581 | 0.00 | 0.00 | N |
| ATOM | 46 | CA   | GLU | 4 | -1.280 | 8.183  | 16.265 | 0.00 | 0.00 | C |
| ATOM | 47 | C    | GLU | 4 | -1.147 | 9.477  | 15.443 | 0.00 | 0.00 | C |
| ATOM | 48 | O    | GLU | 4 | -1.347 | 9.439  | 14.230 | 0.00 | 0.00 | O |
| ATOM | 49 | CB   | GLU | 4 | -2.748 | 7.750  | 16.428 | 0.00 | 0.00 | C |
| ATOM | 50 | CG   | GLU | 4 | -2.882 | 6.426  | 17.202 | 0.00 | 0.00 | C |
| ATOM | 51 | CD   | GLU | 4 | -4.342 | 6.012  | 17.377 | 0.00 | 0.00 | C |
| ATOM | 52 | OE1  | GLU | 4 | -5.017 | 6.642  | 18.220 | 0.00 | 0.00 | O |
| ATOM | 53 | OE2  | GLU | 4 | -4.755 | 5.063  | 16.676 | 0.00 | 0.00 | O |
| ATOM | 54 | H    | GLU | 4 | -1.251 | 8.685  | 18.320 | 0.00 | 0.00 | H |
| ATOM | 55 | HA   | GLU | 4 | -0.762 | 7.391  | 15.723 | 0.00 | 0.00 | H |
| ATOM | 56 | 2HB  | GLU | 4 | -3.303 | 8.531  | 16.946 | 0.00 | 0.00 | H |
| ATOM | 57 | 3HB  | GLU | 4 | -3.185 | 7.617  | 15.437 | 0.00 | 0.00 | H |
| ATOM | 58 | 2HG  | GLU | 4 | -2.441 | 6.526  | 18.194 | 0.00 | 0.00 | H |
| ATOM | 59 | 3HG  | GLU | 4 | -2.342 | 5.645  | 16.667 | 0.00 | 0.00 | H |
| ATOM | 60 | N    | VAL | 5 | -0.769 | 10.598 | 16.080 | 0.00 | 0.00 | N |
| ATOM | 61 | CA   | VAL | 5 | -0.355 | 11.836 | 15.419 | 0.00 | 0.00 | C |
| ATOM | 62 | C    | VAL | 5 | 1.151  | 11.778 | 15.106 | 0.00 | 0.00 | C |
| ATOM | 63 | O    | VAL | 5 | 1.584  | 12.364 | 14.113 | 0.00 | 0.00 | O |
| ATOM | 64 | CB   | VAL | 5 | -0.732 | 13.047 | 16.306 | 0.00 | 0.00 | C |
| ATOM | 65 | CG1  | VAL | 5 | -0.200 | 14.377 | 15.744 | 0.00 | 0.00 | C |
| ATOM | 66 | CG2  | VAL | 5 | -2.259 | 13.172 | 16.449 | 0.00 | 0.00 | C |
| ATOM | 67 | H    | VAL | 5 | -0.643 | 10.561 | 17.081 | 0.00 | 0.00 | H |
| ATOM | 68 | HA   | VAL | 5 | -0.892 | 11.930 | 14.475 | 0.00 | 0.00 | H |
| ATOM | 69 | HB   | VAL | 5 | -0.301 | 12.906 | 17.297 | 0.00 | 0.00 | H |
| ATOM | 70 | 1HG1 | VAL | 5 | -0.552 | 15.208 | 16.357 | 0.00 | 0.00 | H |
| ATOM | 71 | 2HG1 | VAL | 5 | -0.544 | 14.517 | 14.719 | 0.00 | 0.00 | H |
| ATOM | 72 | 3HG1 | VAL | 5 | 0.891  | 14.387 | 15.764 | 0.00 | 0.00 | H |
| ATOM | 73 | 1HG2 | VAL | 5 | -2.504 | 14.012 | 17.101 | 0.00 | 0.00 | H |
| ATOM | 74 | 2HG2 | VAL | 5 | -2.715 | 13.334 | 15.471 | 0.00 | 0.00 | H |
| ATOM | 75 | 3HG2 | VAL | 5 | -2.679 | 12.268 | 16.887 | 0.00 | 0.00 | H |
| ATOM | 76 | N    | GLU | 6 | 1.936  | 11.040 | 15.909 | 0.00 | 0.00 | N |
| ATOM | 77 | CA   | GLU | 6 | 3.349  | 10.782 | 15.654 | 0.00 | 0.00 | C |

|      |     |      |     |    |        |        |        |      |      |   |
|------|-----|------|-----|----|--------|--------|--------|------|------|---|
| ATOM | 78  | C    | GLU | 6  | 3.506  | 9.881  | 14.424 | 0.00 | 0.00 | C |
| ATOM | 79  | O    | GLU | 6  | 4.375  | 10.138 | 13.595 | 0.00 | 0.00 | O |
| ATOM | 80  | CB   | GLU | 6  | 3.973  | 10.139 | 16.905 | 0.00 | 0.00 | C |
| ATOM | 81  | CG   | GLU | 6  | 5.480  | 9.891  | 16.763 | 0.00 | 0.00 | C |
| ATOM | 82  | CD   | GLU | 6  | 6.036  | 9.154  | 17.980 | 0.00 | 0.00 | C |
| ATOM | 83  | OE1  | GLU | 6  | 6.174  | 7.914  | 17.883 | 0.00 | 0.00 | O |
| ATOM | 84  | OE2  | GLU | 6  | 6.312  | 9.841  | 18.988 | 0.00 | 0.00 | O |
| ATOM | 85  | H    | GLU | 6  | 1.525  | 10.583 | 16.710 | 0.00 | 0.00 | H |
| ATOM | 86  | HA   | GLU | 6  | 3.851  | 11.733 | 15.465 | 0.00 | 0.00 | H |
| ATOM | 87  | ZHB  | GLU | 6  | 3.808  | 10.795 | 17.761 | 0.00 | 0.00 | H |
| ATOM | 88  | ZHB  | GLU | 6  | 3.483  | 9.188  | 17.102 | 0.00 | 0.00 | H |
| ATOM | 89  | ZHG  | GLU | 6  | 5.674  | 9.288  | 15.875 | 0.00 | 0.00 | H |
| ATOM | 90  | ZHG  | GLU | 6  | 5.995  | 10.847 | 16.647 | 0.00 | 0.00 | H |
| ATOM | 91  | N    | CYS | 7  | 2.644  | 8.859  | 14.291 | 0.00 | 0.00 | N |
| ATOM | 92  | CA   | CYS | 7  | 2.663  | 7.912  | 13.182 | 0.00 | 0.00 | C |
| ATOM | 93  | C    | CYS | 7  | 1.967  | 8.455  | 11.926 | 0.00 | 0.00 | C |
| ATOM | 94  | O    | CYS | 7  | 2.127  | 7.869  | 10.856 | 0.00 | 0.00 | O |
| ATOM | 95  | CB   | CYS | 7  | 2.056  | 6.585  | 13.644 | 0.00 | 0.00 | C |
| ATOM | 96  | SG   | CYS | 7  | 3.134  | 5.859  | 14.909 | 0.00 | 0.00 | S |
| ATOM | 97  | H    | CYS | 7  | 1.944  | 8.716  | 15.005 | 0.00 | 0.00 | H |
| ATOM | 98  | HA   | CYS | 7  | 3.701  | 7.718  | 12.921 | 0.00 | 0.00 | H |
| ATOM | 99  | ZHB  | CYS | 7  | 1.059  | 6.751  | 14.055 | 0.00 | 0.00 | H |
| ATOM | 100 | ZHB  | CYS | 7  | 1.990  | 5.898  | 12.800 | 0.00 | 0.00 | H |
| ATOM | 101 | HG   | CYS | 7  | 3.051  | 6.881  | 15.767 | 0.00 | 0.00 | H |
| ATOM | 102 | N    | ALA | 8  | 1.246  | 9.584  | 12.034 | 0.00 | 0.00 | N |
| ATOM | 103 | CA   | ALA | 8  | 0.761  | 10.340 | 10.886 | 0.00 | 0.00 | C |
| ATOM | 104 | C    | ALA | 8  | 1.894  | 11.158 | 10.260 | 0.00 | 0.00 | C |
| ATOM | 105 | O    | ALA | 8  | 1.951  | 11.278 | 9.037  | 0.00 | 0.00 | O |
| ATOM | 106 | CB   | ALA | 8  | -0.364 | 11.277 | 11.330 | 0.00 | 0.00 | C |
| ATOM | 107 | H    | ALA | 8  | 1.137  | 10.009 | 12.944 | 0.00 | 0.00 | H |
| ATOM | 108 | HA   | ALA | 8  | 0.362  | 9.651  | 10.141 | 0.00 | 0.00 | H |
| ATOM | 109 | 1HB  | ALA | 8  | -0.719 | 11.828 | 10.462 | 0.00 | 0.00 | H |
| ATOM | 110 | ZHB  | ALA | 8  | -1.184 | 10.706 | 11.764 | 0.00 | 0.00 | H |
| ATOM | 111 | ZHB  | ALA | 8  | 0.003  | 11.989 | 12.068 | 0.00 | 0.00 | H |
| ATOM | 112 | N    | THR | 9  | 2.792  | 11.697 | 11.099 | 0.00 | 0.00 | N |
| ATOM | 113 | CA   | THR | 9  | 3.926  | 12.519 | 10.696 | 0.00 | 0.00 | C |
| ATOM | 114 | C    | THR | 9  | 5.072  | 11.651 | 10.154 | 0.00 | 0.00 | C |
| ATOM | 115 | O    | THR | 9  | 5.813  | 12.110 | 9.288  | 0.00 | 0.00 | O |
| ATOM | 116 | CB   | THR | 9  | 4.360  | 13.379 | 11.900 | 0.00 | 0.00 | C |
| ATOM | 117 | CG2  | THR | 9  | 5.545  | 14.296 | 11.581 | 0.00 | 0.00 | C |
| ATOM | 118 | OG1  | THR | 9  | 3.284  | 14.192 | 12.327 | 0.00 | 0.00 | O |
| ATOM | 119 | H    | THR | 9  | 2.679  | 11.538 | 12.090 | 0.00 | 0.00 | H |
| ATOM | 120 | HA   | THR | 9  | 3.602  | 13.189 | 9.898  | 0.00 | 0.00 | H |
| ATOM | 121 | HB   | THR | 9  | 4.644  | 12.723 | 12.724 | 0.00 | 0.00 | H |
| ATOM | 122 | 1HG  | THR | 9  | 2.584  | 13.623 | 12.654 | 0.00 | 0.00 | H |
| ATOM | 123 | 1HG2 | THR | 9  | 6.441  | 13.698 | 11.423 | 0.00 | 0.00 | H |
| ATOM | 124 | ZHG2 | THR | 9  | 5.727  | 14.969 | 12.420 | 0.00 | 0.00 | H |
| ATOM | 125 | ZHG2 | THR | 9  | 5.336  | 14.885 | 10.687 | 0.00 | 0.00 | H |
| ATOM | 126 | N    | GLN | 10 | 5.192  | 10.397 | 10.613 | 0.00 | 0.00 | N |
| ATOM | 127 | CA   | GLN | 10 | 6.148  | 9.417  | 10.101 | 0.00 | 0.00 | C |
| ATOM | 128 | C    | GLN | 10 | 5.720  | 8.874  | 8.728  | 0.00 | 0.00 | C |
| ATOM | 129 | O    | GLN | 10 | 6.580  | 8.456  | 7.955  | 0.00 | 0.00 | O |
| ATOM | 130 | CB   | GLN | 10 | 6.264  | 8.267  | 11.111 | 0.00 | 0.00 | C |
| ATOM | 131 | CG   | GLN | 10 | 7.080  | 8.648  | 12.358 | 0.00 | 0.00 | C |
| ATOM | 132 | CD   | GLN | 10 | 6.969  | 7.630  | 13.499 | 0.00 | 0.00 | C |
| ATOM | 133 | NE2  | GLN | 10 | 7.765  | 7.831  | 14.551 | 0.00 | 0.00 | N |
| ATOM | 134 | OE1  | GLN | 10 | 6.185  | 6.683  | 13.448 | 0.00 | 0.00 | O |
| ATOM | 135 | H    | GLN | 10 | 4.552  | 10.077 | 11.327 | 0.00 | 0.00 | H |
| ATOM | 136 | HA   | GLN | 10 | 7.124  | 9.890  | 9.994  | 0.00 | 0.00 | H |
| ATOM | 137 | ZHB  | GLN | 10 | 5.259  | 7.965  | 11.402 | 0.00 | 0.00 | H |
| ATOM | 138 | ZHB  | GLN | 10 | 6.750  | 7.417  | 10.634 | 0.00 | 0.00 | H |
| ATOM | 139 | ZHG  | GLN | 10 | 8.128  | 8.745  | 12.070 | 0.00 | 0.00 | H |
| ATOM | 140 | ZHG  | GLN | 10 | 6.757  | 9.618  | 12.733 | 0.00 | 0.00 | H |
| ATOM | 141 | 1HE2 | GLN | 10 | 8.399  | 8.616  | 14.564 | 0.00 | 0.00 | H |
| ATOM | 142 | ZHE2 | GLN | 10 | 7.733  | 7.194  | 15.335 | 0.00 | 0.00 | H |
| ATOM | 143 | N    | LEU | 11 | 4.413  | 8.906  | 8.420  | 0.00 | 0.00 | N |
| ATOM | 144 | CA   | LEU | 11 | 3.852  | 8.494  | 7.136  | 0.00 | 0.00 | C |
| ATOM | 145 | C    | LEU | 11 | 3.895  | 9.638  | 6.107  | 0.00 | 0.00 | C |
| ATOM | 146 | O    | LEU | 11 | 3.852  | 9.364  | 4.908  | 0.00 | 0.00 | O |
| ATOM | 147 | CB   | LEU | 11 | 2.413  | 7.997  | 7.387  | 0.00 | 0.00 | C |
| ATOM | 148 | CG   | LEU | 11 | 1.730  | 7.282  | 6.200  | 0.00 | 0.00 | C |
| ATOM | 149 | CD1  | LEU | 11 | 2.467  | 5.999  | 5.786  | 0.00 | 0.00 | C |
| ATOM | 150 | CD2  | LEU | 11 | 0.283  | 6.932  | 6.577  | 0.00 | 0.00 | C |
| ATOM | 151 | H    | LEU | 11 | 3.762  | 9.260  | 9.106  | 0.00 | 0.00 | H |
| ATOM | 152 | HA   | LEU | 11 | 4.449  | 7.665  | 6.759  | 0.00 | 0.00 | H |
| ATOM | 153 | ZHB  | LEU | 11 | 2.427  | 7.303  | 8.228  | 0.00 | 0.00 | H |
| ATOM | 154 | ZHB  | LEU | 11 | 1.801  | 8.852  | 7.678  | 0.00 | 0.00 | H |
| ATOM | 155 | HG   | LEU | 11 | 1.697  | 7.951  | 5.342  | 0.00 | 0.00 | H |
| ATOM | 156 | 1HD1 | LEU | 11 | 1.884  | 5.473  | 5.032  | 0.00 | 0.00 | H |
| ATOM | 157 | 2HD1 | LEU | 11 | 2.602  | 5.345  | 6.648  | 0.00 | 0.00 | H |
| ATOM | 158 | 3HD1 | LEU | 11 | 3.437  | 6.247  | 5.359  | 0.00 | 0.00 | H |
| ATOM | 159 | 1HD2 | LEU | 11 | 0.274  | 6.253  | 7.430  | 0.00 | 0.00 | H |
| ATOM | 160 | 2HD2 | LEU | 11 | -0.262 | 7.840  | 6.832  | 0.00 | 0.00 | H |
| ATOM | 161 | 3HD2 | LEU | 11 | -0.216 | 6.450  | 5.735  | 0.00 | 0.00 | H |
| ATOM | 162 | N    | ARG | 12 | 3.989  | 10.900 | 6.566  | 0.00 | 0.00 | N |
| ATOM | 163 | CA   | ARG | 12 | 3.876  | 12.106 | 5.747  | 0.00 | 0.00 | C |
| ATOM | 164 | C    | ARG | 12 | 5.237  | 12.736 | 5.431  | 0.00 | 0.00 | C |
| ATOM | 165 | O    | ARG | 12 | 5.389  | 13.311 | 4.353  | 0.00 | 0.00 | O |
| ATOM | 166 | CB   | ARG | 12 | 2.942  | 13.087 | 6.473  | 0.00 | 0.00 | C |
| ATOM | 167 | CG   | ARG | 12 | 2.600  | 14.331 | 5.639  | 0.00 | 0.00 | C |
| ATOM | 168 | CD   | ARG | 12 | 1.516  | 15.188 | 6.305  | 0.00 | 0.00 | C |
| ATOM | 169 | NE   | ARG | 12 | 1.990  | 15.812 | 7.552  | 0.00 | 0.00 | N |
| ATOM | 170 | CZ   | ARG | 12 | 1.742  | 15.387 | 8.806  | 0.00 | 0.00 | C |
| ATOM | 171 | NH1  | ARG | 12 | 0.980  | 14.314 | 9.060  | 0.00 | 0.00 | N |
| ATOM | 172 | NH2  | ARG | 12 | 2.281  | 16.056 | 9.832  | 0.00 | 0.00 | N |
| ATOM | 173 | H    | ARG | 12 | 4.046  | 11.041 | 7.565  | 0.00 | 0.00 | H |
| ATOM | 174 | HA   | ARG | 12 | 3.414  | 11.842 | 4.797  | 0.00 | 0.00 | H |
| ATOM | 175 | ZHB  | ARG | 12 | 2.010  | 12.568 | 6.702  | 0.00 | 0.00 | H |
| ATOM | 176 | ZHB  | ARG | 12 | 3.408  | 13.392 | 7.410  | 0.00 | 0.00 | H |
| ATOM | 177 | ZHG  | ARG | 12 | 3.494  | 14.939 | 5.493  | 0.00 | 0.00 | H |
| ATOM | 178 | ZHG  | ARG | 12 | 2.235  | 14.012 | 4.663  | 0.00 | 0.00 | H |
| ATOM | 179 | ZHD  | ARG | 12 | 1.231  | 15.982 | 5.614  | 0.00 | 0.00 | H |
| ATOM | 180 | ZHD  | ARG | 12 | 0.633  | 14.578 | 6.494  | 0.00 | 0.00 | H |
| ATOM | 181 | HE   | ARG | 12 | 2.570  | 16.632 | 7.442  | 0.00 | 0.00 | H |
| ATOM | 182 | 1HH1 | ARG | 12 | 0.564  | 13.798 | 8.297  | 0.00 | 0.00 | H |

|      |     |      |     |    |        |        |        |      |      |   |
|------|-----|------|-----|----|--------|--------|--------|------|------|---|
| ATOM | 183 | ZHH1 | ARG | 12 | 0.820  | 14.022 | 10.013 | 0.00 | 0.00 | H |
| ATOM | 184 | 1HH2 | ARG | 12 | 2.858  | 16.867 | 9.660  | 0.00 | 0.00 | H |
| ATOM | 185 | 2HH2 | ARG | 12 | 2.113  | 15.747 | 10.779 | 0.00 | 0.00 | H |
| ATOM | 186 | N    | ARG | 13 | 6.229  | 12.595 | 6.325  | 0.00 | 0.00 | N |
| ATOM | 187 | CA   | ARG | 13 | 7.610  | 12.994 | 6.064  | 0.00 | 0.00 | C |
| ATOM | 188 | C    | ARG | 13 | 8.286  | 11.993 | 5.124  | 0.00 | 0.00 | C |
| ATOM | 189 | O    | ARG | 13 | 9.078  | 12.410 | 4.279  | 0.00 | 0.00 | O |
| ATOM | 190 | CB   | ARG | 13 | 8.391  | 13.111 | 7.381  | 0.00 | 0.00 | C |
| ATOM | 191 | CG   | ARG | 13 | 7.991  | 14.360 | 8.181  | 0.00 | 0.00 | C |
| ATOM | 192 | CD   | ARG | 13 | 8.758  | 14.408 | 9.504  | 0.00 | 0.00 | C |
| ATOM | 193 | NE   | ARG | 13 | 8.424  | 15.617 | 10.269 | 0.00 | 0.00 | N |
| ATOM | 194 | CZ   | ARG | 13 | 8.707  | 15.819 | 11.569 | 0.00 | 0.00 | C |
| ATOM | 195 | NH1  | ARG | 13 | 9.351  | 14.898 | 12.300 | 0.00 | 0.00 | N |
| ATOM | 196 | NH2  | ARG | 13 | 8.337  | 16.968 | 12.147 | 0.00 | 0.00 | N |
| ATOM | 197 | H    | ARG | 13 | 6.042  | 12.114 | 7.192  | 0.00 | 0.00 | H |
| ATOM | 198 | HA   | ARG | 13 | 7.612  | 13.971 | 5.577  | 0.00 | 0.00 | H |
| ATOM | 199 | ZHB  | ARG | 13 | 8.231  | 12.214 | 7.982  | 0.00 | 0.00 | H |
| ATOM | 200 | ZHB  | ARG | 13 | 9.455  | 13.182 | 7.153  | 0.00 | 0.00 | H |
| ATOM | 201 | ZHG  | ARG | 13 | 8.225  | 15.250 | 7.595  | 0.00 | 0.00 | H |
| ATOM | 202 | ZHG  | ARG | 13 | 6.920  | 14.348 | 8.386  | 0.00 | 0.00 | H |
| ATOM | 203 | ZHD  | ARG | 13 | 8.507  | 13.525 | 10.091 | 0.00 | 0.00 | H |
| ATOM | 204 | ZHD  | ARG | 13 | 9.830  | 14.406 | 9.300  | 0.00 | 0.00 | H |
| ATOM | 205 | HE   | ARG | 13 | 7.937  | 16.348 | 9.769  | 0.00 | 0.00 | H |
| ATOM | 206 | 1HH1 | ARG | 13 | 9.635  | 14.026 | 11.878 | 0.00 | 0.00 | H |
| ATOM | 207 | ZHH1 | ARG | 13 | 9.550  | 15.075 | 13.275 | 0.00 | 0.00 | H |
| ATOM | 208 | 1HH2 | ARG | 13 | 7.851  | 17.671 | 11.608 | 0.00 | 0.00 | H |
| ATOM | 209 | ZHH2 | ARG | 13 | 8.542  | 17.132 | 13.122 | 0.00 | 0.00 | H |
| ATOM | 210 | N    | PHE | 14 | 7.928  | 10.701 | 5.224  | 0.00 | 0.00 | N |
| ATOM | 211 | CA   | PHE | 14 | 8.257  | 9.700  | 4.216  | 0.00 | 0.00 | C |
| ATOM | 212 | C    | PHE | 14 | 7.280  | 9.749  | 3.029  | 0.00 | 0.00 | C |
| ATOM | 213 | O    | PHE | 14 | 7.592  | 9.212  | 1.970  | 0.00 | 0.00 | O |
| ATOM | 214 | CB   | PHE | 14 | 8.313  | 8.307  | 4.857  | 0.00 | 0.00 | C |
| ATOM | 215 | CG   | PHE | 14 | 8.695  | 7.220  | 3.868  | 0.00 | 0.00 | C |
| ATOM | 216 | CD1  | PHE | 14 | 9.956  | 7.250  | 3.238  | 0.00 | 0.00 | C |
| ATOM | 217 | CD2  | PHE | 14 | 7.753  | 6.243  | 3.496  | 0.00 | 0.00 | C |
| ATOM | 218 | CE1  | PHE | 14 | 10.264 | 6.319  | 2.232  | 0.00 | 0.00 | C |
| ATOM | 219 | CE2  | PHE | 14 | 8.069  | 5.297  | 2.505  | 0.00 | 0.00 | C |
| ATOM | 220 | CZ   | PHE | 14 | 9.322  | 5.341  | 1.870  | 0.00 | 0.00 | C |
| ATOM | 221 | H    | PHE | 14 | 7.281  | 10.427 | 5.949  | 0.00 | 0.00 | H |
| ATOM | 222 | HA   | PHE | 14 | 9.251  | 9.924  | 3.837  | 0.00 | 0.00 | H |
| ATOM | 223 | ZHB  | PHE | 14 | 9.048  | 8.315  | 5.664  | 0.00 | 0.00 | H |
| ATOM | 224 | ZHB  | PHE | 14 | 7.338  | 8.077  | 5.289  | 0.00 | 0.00 | H |
| ATOM | 225 | HD1  | PHE | 14 | 10.682 | 8.003  | 3.506  | 0.00 | 0.00 | H |
| ATOM | 226 | HD2  | PHE | 14 | 6.776  | 6.232  | 3.954  | 0.00 | 0.00 | H |
| ATOM | 227 | HE1  | PHE | 14 | 11.223 | 6.353  | 1.737  | 0.00 | 0.00 | H |
| ATOM | 228 | HE2  | PHE | 14 | 7.342  | 4.552  | 2.219  | 0.00 | 0.00 | H |
| ATOM | 229 | HZ   | PHE | 14 | 9.560  | 4.627  | 1.098  | 0.00 | 0.00 | H |
| ATOM | 230 | N    | GLY | 15 | 6.129  | 10.425 | 3.172  | 0.00 | 0.00 | N |
| ATOM | 231 | CA   | GLY | 15 | 5.218  | 10.712 | 2.074  | 0.00 | 0.00 | C |
| ATOM | 232 | C    | GLY | 15 | 5.793  | 11.738 | 1.087  | 0.00 | 0.00 | C |
| ATOM | 233 | O    | GLY | 15 | 5.368  | 11.760 | -0.065 | 0.00 | 0.00 | O |
| ATOM | 234 | H    | GLY | 15 | 5.914  | 10.840 | 4.066  | 0.00 | 0.00 | H |
| ATOM | 235 | ZHA  | GLY | 15 | 4.983  | 9.788  | 1.545  | 0.00 | 0.00 | H |
| ATOM | 236 | ZHA  | GLY | 15 | 4.302  | 11.115 | 2.502  | 0.00 | 0.00 | H |
| ATOM | 237 | N    | ASP | 16 | 6.778  | 12.543 | 1.518  | 0.00 | 0.00 | N |
| ATOM | 238 | CA   | ASP | 16 | 7.470  | 13.536 | 0.699  | 0.00 | 0.00 | C |
| ATOM | 239 | C    | ASP | 16 | 8.907  | 13.111 | 0.365  | 0.00 | 0.00 | C |
| ATOM | 240 | O    | ASP | 16 | 9.480  | 13.645 | -0.585 | 0.00 | 0.00 | O |
| ATOM | 241 | CB   | ASP | 16 | 7.461  | 14.889 | 1.425  | 0.00 | 0.00 | C |
| ATOM | 242 | CG   | ASP | 16 | 6.051  | 15.409 | 1.719  | 0.00 | 0.00 | C |
| ATOM | 243 | OD1  | ASP | 16 | 5.850  | 15.880 | 2.860  | 0.00 | 0.00 | O |
| ATOM | 244 | OD2  | ASP | 16 | 5.201  | 15.342 | 0.803  | 0.00 | 0.00 | O |
| ATOM | 245 | H    | ASP | 16 | 7.081  | 12.461 | 2.479  | 0.00 | 0.00 | H |
| ATOM | 246 | HA   | ASP | 16 | 6.936  | 13.659 | -0.244 | 0.00 | 0.00 | H |
| ATOM | 247 | ZHB  | ASP | 16 | 8.014  | 14.791 | 2.362  | 0.00 | 0.00 | H |
| ATOM | 248 | ZHB  | ASP | 16 | 7.973  | 15.626 | 0.806  | 0.00 | 0.00 | H |
| ATOM | 249 | N    | LYS | 17 | 9.479  | 12.151 | 1.110  | 0.00 | 0.00 | N |
| ATOM | 250 | CA   | LYS | 17 | 10.792 | 11.580 | 0.824  | 0.00 | 0.00 | C |
| ATOM | 251 | C    | LYS | 17 | 10.681 | 10.409 | -0.161 | 0.00 | 0.00 | C |
| ATOM | 252 | O    | LYS | 17 | 11.649 | 10.132 | -0.866 | 0.00 | 0.00 | O |
| ATOM | 253 | CB   | LYS | 17 | 11.476 | 11.187 | 2.142  | 0.00 | 0.00 | C |
| ATOM | 254 | CG   | LYS | 17 | 12.973 | 10.897 | 1.957  | 0.00 | 0.00 | C |
| ATOM | 255 | CD   | LYS | 17 | 13.668 | 10.711 | 3.309  | 0.00 | 0.00 | C |
| ATOM | 256 | CE   | LYS | 17 | 15.162 | 10.465 | 3.091  | 0.00 | 0.00 | C |
| ATOM | 257 | NZ   | LYS | 17 | 15.872 | 10.279 | 4.368  | 0.00 | 0.00 | N |
| ATOM | 258 | H    | LYS | 17 | 8.961  | 11.754 | 1.882  | 0.00 | 0.00 | H |
| ATOM | 259 | HA   | LYS | 17 | 11.403 | 12.354 | 0.357  | 0.00 | 0.00 | H |
| ATOM | 260 | ZHB  | LYS | 17 | 11.373 | 12.015 | 2.846  | 0.00 | 0.00 | H |
| ATOM | 261 | ZHB  | LYS | 17 | 10.987 | 10.307 | 2.559  | 0.00 | 0.00 | H |
| ATOM | 262 | ZHG  | LYS | 17 | 13.100 | 9.990  | 1.365  | 0.00 | 0.00 | H |
| ATOM | 263 | ZHG  | LYS | 17 | 13.438 | 11.733 | 1.431  | 0.00 | 0.00 | H |
| ATOM | 264 | ZHD  | LYS | 17 | 13.538 | 11.610 | 3.913  | 0.00 | 0.00 | H |
| ATOM | 265 | ZHD  | LYS | 17 | 13.227 | 9.862  | 3.832  | 0.00 | 0.00 | H |
| ATOM | 266 | ZHE  | LYS | 17 | 15.291 | 9.573  | 2.478  | 0.00 | 0.00 | H |
| ATOM | 267 | ZHE  | LYS | 17 | 15.592 | 11.319 | 2.567  | 0.00 | 0.00 | H |
| ATOM | 268 | 1HZ  | LYS | 17 | 15.486 | 9.481  | 4.855  | 0.00 | 0.00 | H |
| ATOM | 269 | 2HZ  | LYS | 17 | 16.853 | 10.120 | 4.188  | 0.00 | 0.00 | H |
| ATOM | 270 | 3HZ  | LYS | 17 | 15.763 | 11.106 | 4.938  | 0.00 | 0.00 | H |
| ATOM | 271 | N    | LEU | 18 | 9.503  | 9.768  | -0.259 | 0.00 | 0.00 | N |
| ATOM | 272 | CA   | LEU | 18 | 9.174  | 8.822  | -1.321 | 0.00 | 0.00 | C |
| ATOM | 273 | C    | LEU | 18 | 8.775  | 9.564  | -2.602 | 0.00 | 0.00 | C |
| ATOM | 274 | O    | LEU | 18 | 8.990  | 9.034  | -3.688 | 0.00 | 0.00 | O |
| ATOM | 275 | CB   | LEU | 18 | 8.065  | 7.866  | -0.846 | 0.00 | 0.00 | C |
| ATOM | 276 | CG   | LEU | 18 | 7.676  | 6.761  | -1.853 | 0.00 | 0.00 | C |
| ATOM | 277 | CD1  | LEU | 18 | 8.876  | 5.929  | -2.331 | 0.00 | 0.00 | C |
| ATOM | 278 | CD2  | LEU | 18 | 6.647  | 5.823  | -1.210 | 0.00 | 0.00 | C |
| ATOM | 279 | H    | LEU | 18 | 8.751  | 10.037 | 0.358  | 0.00 | 0.00 | H |
| ATOM | 280 | HA   | LEU | 18 | 10.064 | 8.232  | -1.523 | 0.00 | 0.00 | H |
| ATOM | 281 | ZHB  | LEU | 18 | 8.402  | 7.391  | 0.075  | 0.00 | 0.00 | H |
| ATOM | 282 | ZHB  | LEU | 18 | 7.175  | 8.453  | -0.617 | 0.00 | 0.00 | H |
| ATOM | 283 | HG   | LEU | 18 | 7.208  | 7.222  | -2.723 | 0.00 | 0.00 | H |
| ATOM | 284 | 1HD1 | LEU | 18 | 8.532  | 5.085  | -2.931 | 0.00 | 0.00 | H |
| ATOM | 285 | ZHD1 | LEU | 18 | 9.539  | 6.531  | -2.947 | 0.00 | 0.00 | H |
| ATOM | 286 | 3HD1 | LEU | 18 | 9.426  | 5.559  | -1.468 | 0.00 | 0.00 | H |
| ATOM | 287 | 1HD2 | LEU | 18 | 5.773  | 6.394  | -0.911 | 0.00 | 0.00 | H |



|      |     |      |     |    |        |        |         |      |      |   |
|------|-----|------|-----|----|--------|--------|---------|------|------|---|
| ATOM | 288 | ZHD2 | LEU | 18 | 6.340  | 5.065  | -1.928  | 0.00 | 0.00 | H |
| ATOM | 289 | 3HD2 | LEU | 18 | 7.075  | 5.333  | -0.335  | 0.00 | 0.00 | H |
| ATOM | 290 | N    | ASN | 19 | 8.257  | 10.798 | -2.491  | 0.00 | 0.00 | N |
| ATOM | 291 | CA   | ASN | 19 | 7.990  | 11.652 | -3.644  | 0.00 | 0.00 | C |
| ATOM | 292 | C    | ASN | 19 | 9.305  | 12.055 | -4.329  | 0.00 | 0.00 | C |
| ATOM | 293 | O    | ASN | 19 | 9.333  | 12.187 | -5.551  | 0.00 | 0.00 | O |
| ATOM | 294 | CB   | ASN | 19 | 7.204  | 12.890 | -3.186  | 0.00 | 0.00 | C |
| ATOM | 295 | CG   | ASN | 19 | 6.560  | 13.674 | -4.333  | 0.00 | 0.00 | C |
| ATOM | 296 | ND2  | ASN | 19 | 6.296  | 14.961 | -4.097  | 0.00 | 0.00 | N |
| ATOM | 297 | OD1  | ASN | 19 | 6.284  | 13.136 | -5.404  | 0.00 | 0.00 | O |
| ATOM | 298 | H    | ASN | 19 | 8.104  | 11.193 | -1.574  | 0.00 | 0.00 | H |
| ATOM | 299 | HA   | ASN | 19 | 7.379  | 11.083 | -4.347  | 0.00 | 0.00 | H |
| ATOM | 300 | ZHB  | ASN | 19 | 6.413  | 12.585 | -2.503  | 0.00 | 0.00 | H |
| ATOM | 301 | 3HB  | ASN | 19 | 7.872  | 13.552 | -2.636  | 0.00 | 0.00 | H |
| ATOM | 302 | 1HD2 | ASN | 19 | 5.858  | 15.525 | -4.812  | 0.00 | 0.00 | H |
| ATOM | 303 | ZHD2 | ASN | 19 | 6.527  | 15.368 | -3.202  | 0.00 | 0.00 | H |
| ATOM | 304 | N    | PHE | 20 | 10.393 | 12.191 | -3.551  | 0.00 | 0.00 | N |
| ATOM | 305 | CA   | PHE | 20 | 11.741 | 12.422 | -4.051  | 0.00 | 0.00 | C |
| ATOM | 306 | C    | PHE | 20 | 12.411 | 11.116 | -4.506  | 0.00 | 0.00 | C |
| ATOM | 307 | O    | PHE | 20 | 13.212 | 11.157 | -5.436  | 0.00 | 0.00 | O |
| ATOM | 308 | CB   | PHE | 20 | 12.564 | 13.115 | -2.957  | 0.00 | 0.00 | C |
| ATOM | 309 | CG   | PHE | 20 | 13.998 | 13.398 | -3.367  | 0.00 | 0.00 | C |
| ATOM | 310 | CD1  | PHE | 20 | 15.045 | 12.580 | -2.896  | 0.00 | 0.00 | C |
| ATOM | 311 | CD2  | PHE | 20 | 14.281 | 14.452 | -4.257  | 0.00 | 0.00 | C |
| ATOM | 312 | CE1  | PHE | 20 | 16.366 | 12.819 | -3.312  | 0.00 | 0.00 | C |
| ATOM | 313 | CE2  | PHE | 20 | 15.603 | 14.688 | -4.673  | 0.00 | 0.00 | C |
| ATOM | 314 | CZ   | PHE | 20 | 16.646 | 13.872 | -4.201  | 0.00 | 0.00 | C |
| ATOM | 315 | H    | PHE | 20 | 10.293 | 12.068 | -2.553  | 0.00 | 0.00 | H |
| ATOM | 316 | HA   | PHE | 20 | 11.685 | 13.094 | -4.908  | 0.00 | 0.00 | H |
| ATOM | 317 | ZHB  | PHE | 20 | 12.083 | 14.060 | -2.701  | 0.00 | 0.00 | H |
| ATOM | 318 | 3HB  | PHE | 20 | 12.564 | 12.492 | -2.062  | 0.00 | 0.00 | H |
| ATOM | 319 | HD1  | PHE | 20 | 14.837 | 11.762 | -2.224  | 0.00 | 0.00 | H |
| ATOM | 320 | HD2  | PHE | 20 | 13.482 | 15.077 | -4.630  | 0.00 | 0.00 | H |
| ATOM | 321 | HE1  | PHE | 20 | 17.168 | 12.190 | -2.952  | 0.00 | 0.00 | H |
| ATOM | 322 | HE2  | PHE | 20 | 15.817 | 15.496 | -5.358  | 0.00 | 0.00 | H |
| ATOM | 323 | HZ   | PHE | 20 | 17.660 | 14.052 | -4.524  | 0.00 | 0.00 | H |
| ATOM | 324 | N    | ARG | 21 | 12.069 | 9.971  | -3.888  | 0.00 | 0.00 | N |
| ATOM | 325 | CA   | ARG | 21 | 12.571 | 8.639  | -4.238  | 0.00 | 0.00 | C |
| ATOM | 326 | C    | ARG | 21 | 11.691 | 7.977  | -5.321  | 0.00 | 0.00 | C |
| ATOM | 327 | O    | ARG | 21 | 11.588 | 6.754  | -5.399  | 0.00 | 0.00 | O |
| ATOM | 328 | CB   | ARG | 21 | 12.749 | 7.813  | -2.951  | 0.00 | 0.00 | C |
| ATOM | 329 | CG   | ARG | 21 | 13.716 | 6.628  | -3.085  | 0.00 | 0.00 | C |
| ATOM | 330 | CD   | ARG | 21 | 13.880 | 5.944  | -1.722  | 0.00 | 0.00 | C |
| ATOM | 331 | NE   | ARG | 21 | 14.767 | 4.775  | -1.805  | 0.00 | 0.00 | N |
| ATOM | 332 | CZ   | ARG | 21 | 16.110 | 4.800  | -1.735  | 0.00 | 0.00 | C |
| ATOM | 333 | NH1  | ARG | 21 | 16.789 | 5.943  | -1.557  | 0.00 | 0.00 | N |
| ATOM | 334 | NH2  | ARG | 21 | 16.789 | 3.651  | -1.846  | 0.00 | 0.00 | N |
| ATOM | 335 | H    | ARG | 21 | 11.396 | 10.015 | -3.136  | 0.00 | 0.00 | H |
| ATOM | 336 | HA   | ARG | 21 | 13.564 | 8.775  | -4.670  | 0.00 | 0.00 | H |
| ATOM | 337 | ZHB  | ARG | 21 | 13.153 | 8.467  | -2.177  | 0.00 | 0.00 | H |
| ATOM | 338 | 3HB  | ARG | 21 | 11.777 | 7.448  | -2.621  | 0.00 | 0.00 | H |
| ATOM | 339 | ZHG  | ARG | 21 | 13.332 | 5.901  | -3.800  | 0.00 | 0.00 | H |
| ATOM | 340 | 3HG  | ARG | 21 | 14.685 | 6.990  | -3.429  | 0.00 | 0.00 | H |
| ATOM | 341 | ZHD  | ARG | 21 | 14.277 | 6.658  | -0.998  | 0.00 | 0.00 | H |
| ATOM | 342 | 3HD  | ARG | 21 | 12.902 | 5.616  | -1.374  | 0.00 | 0.00 | H |
| ATOM | 343 | HE   | ARG | 21 | 14.318 | 3.881  | -1.943  | 0.00 | 0.00 | H |
| ATOM | 344 | 1HH1 | ARG | 21 | 16.289 | 6.817  | -1.476  | 0.00 | 0.00 | H |
| ATOM | 345 | 2HH1 | ARG | 21 | 17.797 | 5.930  | -1.513  | 0.00 | 0.00 | H |
| ATOM | 346 | 1HH2 | ARG | 21 | 16.292 | 2.784  | -1.991  | 0.00 | 0.00 | H |
| ATOM | 347 | 2HH2 | ARG | 21 | 17.798 | 3.653  | -1.800  | 0.00 | 0.00 | H |
| ATOM | 348 | N    | GLN | 22 | 11.057 | 8.810  | -6.159  | 0.00 | 0.00 | N |
| ATOM | 349 | CA   | GLN | 22 | 10.289 | 8.445  | -7.344  | 0.00 | 0.00 | C |
| ATOM | 350 | C    | GLN | 22 | 10.703 | 9.356  | -8.505  | 0.00 | 0.00 | C |
| ATOM | 351 | O    | GLN | 22 | 10.783 | 8.882  | -9.637  | 0.00 | 0.00 | O |
| ATOM | 352 | CB   | GLN | 22 | 8.788  | 8.585  | -7.048  | 0.00 | 0.00 | C |
| ATOM | 353 | CG   | GLN | 22 | 8.235  | 7.365  | -6.289  | 0.00 | 0.00 | C |
| ATOM | 354 | CD   | GLN | 22 | 6.828  | 7.582  | -5.727  | 0.00 | 0.00 | C |
| ATOM | 355 | NE2  | GLN | 22 | 6.143  | 6.486  | -5.400  | 0.00 | 0.00 | N |
| ATOM | 356 | OE1  | GLN | 22 | 6.367  | 8.711  | -5.570  | 0.00 | 0.00 | O |
| ATOM | 357 | H    | GLN | 22 | 11.173 | 9.802  | -6.005  | 0.00 | 0.00 | H |
| ATOM | 358 | HA   | GLN | 22 | 10.497 | 7.412  | -7.624  | 0.00 | 0.00 | H |
| ATOM | 359 | ZHB  | GLN | 22 | 8.624  | 9.499  | -6.476  | 0.00 | 0.00 | H |
| ATOM | 360 | 3HB  | GLN | 22 | 8.241  | 8.671  | -7.989  | 0.00 | 0.00 | H |
| ATOM | 361 | ZHG  | GLN | 22 | 8.222  | 6.512  | -6.968  | 0.00 | 0.00 | H |
| ATOM | 362 | 3HG  | GLN | 22 | 8.891  | 7.112  | -5.459  | 0.00 | 0.00 | H |
| ATOM | 363 | 1HE2 | GLN | 22 | 5.209  | 6.570  | -5.022  | 0.00 | 0.00 | H |
| ATOM | 364 | 2HE2 | GLN | 22 | 6.554  | 5.573  | -5.535  | 0.00 | 0.00 | H |
| ATOM | 365 | N    | LYS | 23 | 11.011 | 10.632 | -8.215  | 0.00 | 0.00 | N |
| ATOM | 366 | CA   | LYS | 23 | 11.531 | 11.613 | -9.165  | 0.00 | 0.00 | C |
| ATOM | 367 | C    | LYS | 23 | 13.023 | 11.387 | -9.443  | 0.00 | 0.00 | C |
| ATOM | 368 | O    | LYS | 23 | 13.477 | 11.645 | -10.557 | 0.00 | 0.00 | O |
| ATOM | 369 | CB   | LYS | 23 | 11.298 | 13.023 | -8.600  | 0.00 | 0.00 | C |
| ATOM | 370 | CG   | LYS | 23 | 9.809  | 13.407 | -8.594  | 0.00 | 0.00 | C |
| ATOM | 371 | CD   | LYS | 23 | 9.583  | 14.717 | -7.831  | 0.00 | 0.00 | C |
| ATOM | 372 | CE   | LYS | 23 | 8.086  | 15.028 | -7.762  | 0.00 | 0.00 | C |
| ATOM | 373 | NZ   | LYS | 23 | 7.824  | 16.245 | -6.978  | 0.00 | 0.00 | N |
| ATOM | 374 | H    | LYS | 23 | 10.916 | 10.940 | -7.258  | 0.00 | 0.00 | H |
| ATOM | 375 | HA   | LYS | 23 | 10.988 | 11.524 | -10.106 | 0.00 | 0.00 | H |
| ATOM | 376 | ZHB  | LYS | 23 | 11.695 | 13.069 | -7.583  | 0.00 | 0.00 | H |
| ATOM | 377 | 3HB  | LYS | 23 | 11.838 | 13.748 | -9.211  | 0.00 | 0.00 | H |
| ATOM | 378 | ZHG  | LYS | 23 | 9.464  | 13.521 | -9.623  | 0.00 | 0.00 | H |
| ATOM | 379 | 3HG  | LYS | 23 | 9.223  | 12.619 | -8.121  | 0.00 | 0.00 | H |
| ATOM | 380 | ZHD  | LYS | 23 | 9.974  | 14.622 | -6.817  | 0.00 | 0.00 | H |
| ATOM | 381 | 3HD  | LYS | 23 | 10.101 | 15.532 | -8.340  | 0.00 | 0.00 | H |
| ATOM | 382 | ZHE  | LYS | 23 | 7.701  | 15.161 | -8.772  | 0.00 | 0.00 | H |
| ATOM | 383 | 3HE  | LYS | 23 | 7.571  | 14.188 | -7.294  | 0.00 | 0.00 | H |
| ATOM | 384 | 1HZ  | LYS | 23 | 6.830  | 16.422 | -6.953  | 0.00 | 0.00 | H |
| ATOM | 385 | 2HZ  | LYS | 23 | 8.168  | 16.120 | -6.036  | 0.00 | 0.00 | H |
| ATOM | 386 | 3HZ  | LYS | 23 | 8.295  | 17.030 | -7.407  | 0.00 | 0.00 | H |
| ATOM | 387 | N    | LEU | 24 | 13.766 | 10.871 | -8.451  | 0.00 | 0.00 | N |
| ATOM | 388 | CA   | LEU | 24 | 15.151 | 10.430 | -8.587  | 0.00 | 0.00 | C |
| ATOM | 389 | C    | LEU | 24 | 15.220 | 9.082  | -9.322  | 0.00 | 0.00 | C |
| ATOM | 390 | O    | LEU | 24 | 16.203 | 8.814  | -10.011 | 0.00 | 0.00 | O |
| ATOM | 391 | CB   | LEU | 24 | 15.754 | 10.337 | -7.172  | 0.00 | 0.00 | C |
| ATOM | 392 | CG   | LEU | 24 | 17.235 | 9.910  | -7.098  | 0.00 | 0.00 | C |

|       |     |      |     |    |         |        |         |      |      |   |
|-------|-----|------|-----|----|---------|--------|---------|------|------|---|
| ATOM  | 393 | CD1  | LEU | 24 | 18.165  | 10.903 | -7.815  | 0.00 | 0.00 | C |
| ATOM  | 394 | CD2  | LEU | 24 | 17.653  | 9.786  | -5.626  | 0.00 | 0.00 | C |
| ATOM  | 395 | H    | LEU | 24 | 13.324  | 10.697 | -7.561  | 0.00 | 0.00 | H |
| ATOM  | 396 | HA   | LEU | 24 | 15.697  | 11.178 | -9.160  | 0.00 | 0.00 | H |
| ATOM  | 397 | ZHB  | LEU | 24 | 15.655  | 11.311 | -6.690  | 0.00 | 0.00 | H |
| ATOM  | 398 | ZHB  | LEU | 24 | 15.165  | 9.617  | -6.600  | 0.00 | 0.00 | H |
| ATOM  | 399 | HG   | LEU | 24 | 17.351  | 8.929  | -7.559  | 0.00 | 0.00 | H |
| ATOM  | 400 | 1HD1 | LEU | 24 | 18.041  | 11.902 | -7.398  | 0.00 | 0.00 | H |
| ATOM  | 401 | 2HD1 | LEU | 24 | 19.202  | 10.590 | -7.693  | 0.00 | 0.00 | H |
| ATOM  | 402 | 3HD1 | LEU | 24 | 17.940  | 10.927 | -8.881  | 0.00 | 0.00 | H |
| ATOM  | 403 | 1HD2 | LEU | 24 | 17.013  | 9.061  | -5.119  | 0.00 | 0.00 | H |
| ATOM  | 404 | 2HD2 | LEU | 24 | 18.686  | 9.442  | -5.562  | 0.00 | 0.00 | H |
| ATOM  | 405 | 3HD2 | LEU | 24 | 17.566  | 10.751 | -5.127  | 0.00 | 0.00 | H |
| ATOM  | 406 | N    | LEU | 25 | 14.168  | 8.258  | -9.192  | 0.00 | 0.00 | N |
| ATOM  | 407 | CA   | LEU | 25 | 14.061  | 6.935  | -9.798  | 0.00 | 0.00 | C |
| ATOM  | 408 | C    | LEU | 25 | 13.519  | 7.000  | -11.238 | 0.00 | 0.00 | C |
| ATOM  | 409 | O    | LEU | 25 | 13.569  | 5.983  | -11.932 | 0.00 | 0.00 | O |
| ATOM  | 410 | CB   | LEU | 25 | 13.201  | 6.029  | -8.889  | 0.00 | 0.00 | C |
| ATOM  | 411 | CG   | LEU | 25 | 13.927  | 5.367  | -7.692  | 0.00 | 0.00 | C |
| ATOM  | 412 | CD1  | LEU | 25 | 14.854  | 4.233  | -8.152  | 0.00 | 0.00 | C |
| ATOM  | 413 | CD2  | LEU | 25 | 14.721  | 6.345  | -6.808  | 0.00 | 0.00 | C |
| ATOM  | 414 | H    | LEU | 25 | 13.390  | 8.555  | -8.620  | 0.00 | 0.00 | H |
| ATOM  | 415 | HA   | LEU | 25 | 15.060  | 6.504  | -9.859  | 0.00 | 0.00 | H |
| ATOM  | 416 | ZHB  | LEU | 25 | 12.771  | 5.229  | -9.493  | 0.00 | 0.00 | H |
| ATOM  | 417 | ZHB  | LEU | 25 | 12.365  | 6.614  | -8.509  | 0.00 | 0.00 | H |
| ATOM  | 418 | HG   | LEU | 25 | 13.155  | 4.916  | -7.065  | 0.00 | 0.00 | H |
| ATOM  | 419 | 1HD1 | LEU | 25 | 14.290  | 3.508  | -8.739  | 0.00 | 0.00 | H |
| ATOM  | 420 | 2HD1 | LEU | 25 | 15.274  | 3.725  | -7.284  | 0.00 | 0.00 | H |
| ATOM  | 421 | 3HD1 | LEU | 25 | 15.671  | 4.626  | -8.759  | 0.00 | 0.00 | H |
| ATOM  | 422 | 1HD2 | LEU | 25 | 15.052  | 5.834  | -5.903  | 0.00 | 0.00 | H |
| ATOM  | 423 | 2HD2 | LEU | 25 | 15.598  | 6.715  | -7.340  | 0.00 | 0.00 | H |
| ATOM  | 424 | 3HD2 | LEU | 25 | 14.092  | 7.188  | -6.526  | 0.00 | 0.00 | H |
| ATOM  | 425 | N    | ASN | 26 | 13.064  | 8.176  | -11.714 | 0.00 | 0.00 | N |
| ATOM  | 426 | CA   | ASN | 26 | 12.812  | 8.420  | -13.131 | 0.00 | 0.00 | C |
| ATOM  | 427 | C    | ASN | 26 | 14.151  | 8.598  | -13.870 | 0.00 | 0.00 | C |
| ATOM  | 428 | O    | ASN | 26 | 15.093  | 9.152  | -13.303 | 0.00 | 0.00 | O |
| ATOM  | 429 | CB   | ASN | 26 | 11.917  | 9.655  | -13.340 | 0.00 | 0.00 | C |
| ATOM  | 430 | CG   | ASN | 26 | 10.465  | 9.453  | -12.901 | 0.00 | 0.00 | C |
| ATOM  | 431 | ND2  | ASN | 26 | 9.781   | 8.459  | -13.473 | 0.00 | 0.00 | N |
| ATOM  | 432 | OD1  | ASN | 26 | 9.953   | 10.207 | -12.076 | 0.00 | 0.00 | O |
| ATOM  | 433 | H    | ASN | 26 | 13.031  | 8.975  | -11.096 | 0.00 | 0.00 | H |
| ATOM  | 434 | HA   | ASN | 26 | 12.290  | 7.553  | -13.532 | 0.00 | 0.00 | H |
| ATOM  | 435 | ZHB  | ASN | 26 | 11.908  | 9.901  | -14.403 | 0.00 | 0.00 | H |
| ATOM  | 436 | ZHB  | ASN | 26 | 12.346  | 10.506 | -12.809 | 0.00 | 0.00 | H |
| ATOM  | 437 | 1HD2 | ASN | 26 | 8.816   | 8.301  | -13.222 | 0.00 | 0.00 | H |
| ATOM  | 438 | 2HD2 | ASN | 26 | 10.230  | 7.867  | -14.158 | 0.00 | 0.00 | H |
| ATOM  | 439 | N    | LEU | 27 | 14.282  | 8.171  | -15.139 | 0.00 | 0.00 | N |
| ATOM  | 440 | CA   | LEU | 27 | 13.275  | 7.512  | -15.964 | 0.00 | 0.00 | C |
| ATOM  | 441 | C    | LEU | 27 | 13.532  | 7.864  | -17.426 | 0.00 | 0.00 | C |
| ATOM  | 442 | O    | LEU | 27 | 12.758  | 7.498  | -18.310 | 0.00 | 0.00 | O |
| ATOM  | 443 | CB   | LEU | 27 | 13.256  | 5.985  | -15.725 | 0.00 | 0.00 | C |
| ATOM  | 444 | CG   | LEU | 27 | 14.438  | 5.151  | -16.273 | 0.00 | 0.00 | C |
| ATOM  | 445 | CD1  | LEU | 27 | 14.140  | 3.661  | -16.039 | 0.00 | 0.00 | C |
| ATOM  | 446 | CD2  | LEU | 27 | 15.795  | 5.489  | -15.631 | 0.00 | 0.00 | C |
| ATOM  | 447 | H    | LEU | 27 | 15.177  | 8.313  | -15.583 | 0.00 | 0.00 | H |
| ATOM  | 448 | HA   | LEU | 27 | 12.295  | 7.912  | -15.704 | 0.00 | 0.00 | H |
| ATOM  | 449 | ZHB  | LEU | 27 | 12.343  | 5.607  | -16.190 | 0.00 | 0.00 | H |
| ATOM  | 450 | ZHB  | LEU | 27 | 13.163  | 5.797  | -14.656 | 0.00 | 0.00 | H |
| ATOM  | 451 | HG   | LEU | 27 | 14.519  | 5.308  | -17.349 | 0.00 | 0.00 | H |
| ATOM  | 452 | 1HD1 | LEU | 27 | 13.203  | 3.388  | -16.526 | 0.00 | 0.00 | H |
| ATOM  | 453 | 2HD1 | LEU | 27 | 14.063  | 3.455  | -14.970 | 0.00 | 0.00 | H |
| ATOM  | 454 | 3HD1 | LEU | 27 | 14.939  | 3.051  | -16.463 | 0.00 | 0.00 | H |
| ATOM  | 455 | 1HD2 | LEU | 27 | 15.717  | 5.453  | -14.543 | 0.00 | 0.00 | H |
| ATOM  | 456 | 2HD2 | LEU | 27 | 16.123  | 6.480  | -15.941 | 0.00 | 0.00 | H |
| ATOM  | 457 | 3HD2 | LEU | 27 | 16.550  | 4.773  | -15.958 | 0.00 | 0.00 | H |
| TER   |     |      |     |    |         |        |         |      |      |   |
| MOL 2 |     |      |     |    |         |        |         |      |      |   |
| ATOM  | 458 | N    | SER | 28 | -9.963  | 4.441  | -14.945 | 0.00 | 0.00 | N |
| ATOM  | 459 | CA   | SER | 28 | -8.866  | 5.336  | -15.291 | 0.00 | 0.00 | C |
| ATOM  | 460 | C    | SER | 28 | -9.328  | 6.779  | -15.563 | 0.00 | 0.00 | C |
| ATOM  | 461 | O    | SER | 28 | -8.478  | 7.641  | -15.785 | 0.00 | 0.00 | O |
| ATOM  | 462 | CB   | SER | 28 | -8.105  | 4.764  | -16.494 | 0.00 | 0.00 | C |
| ATOM  | 463 | OG   | SER | 28 | -7.480  | 3.543  | -16.155 | 0.00 | 0.00 | O |
| ATOM  | 464 | H    | SER | 28 | -9.808  | 3.760  | -14.214 | 0.00 | 0.00 | H |
| ATOM  | 465 | HA   | SER | 28 | -8.179  | 5.367  | -14.447 | 0.00 | 0.00 | H |
| ATOM  | 466 | ZHB  | SER | 28 | -8.794  | 4.604  | -17.324 | 0.00 | 0.00 | H |
| ATOM  | 467 | ZHB  | SER | 28 | -7.335  | 5.469  | -16.807 | 0.00 | 0.00 | H |
| ATOM  | 468 | HG   | SER | 28 | -8.159  | 2.913  | -15.903 | 0.00 | 0.00 | H |
| ATOM  | 469 | N    | ALA | 29 | -10.646 | 7.046  | -15.544 | 0.00 | 0.00 | N |
| ATOM  | 470 | CA   | ALA | 29 | -11.243 | 8.335  | -15.904 | 0.00 | 0.00 | C |
| ATOM  | 471 | C    | ALA | 29 | -12.222 | 8.868  | -14.845 | 0.00 | 0.00 | C |
| ATOM  | 472 | O    | ALA | 29 | -12.635 | 10.024 | -14.945 | 0.00 | 0.00 | O |
| ATOM  | 473 | CB   | ALA | 29 | -11.930 | 8.194  | -17.267 | 0.00 | 0.00 | C |
| ATOM  | 474 | H    | ALA | 29 | -11.288 | 6.295  | -15.337 | 0.00 | 0.00 | H |
| ATOM  | 475 | HA   | ALA | 29 | -10.450 | 9.076  | -16.008 | 0.00 | 0.00 | H |
| ATOM  | 476 | 1HB  | ALA | 29 | -12.752 | 7.481  | -17.199 | 0.00 | 0.00 | H |
| ATOM  | 477 | ZHB  | ALA | 29 | -12.321 | 9.160  | -17.585 | 0.00 | 0.00 | H |
| ATOM  | 478 | ZHB  | ALA | 29 | -11.211 | 7.844  | -18.008 | 0.00 | 0.00 | H |
| ATOM  | 479 | N    | SER | 30 | -12.569 | 8.061  | -13.830 | 0.00 | 0.00 | N |
| ATOM  | 480 | CA   | SER | 30 | -13.348 | 8.479  | -12.667 | 0.00 | 0.00 | C |
| ATOM  | 481 | C    | SER | 30 | -12.830 | 7.790  | -11.402 | 0.00 | 0.00 | C |
| ATOM  | 482 | O    | SER | 30 | -12.149 | 6.767  | -11.478 | 0.00 | 0.00 | O |
| ATOM  | 483 | CB   | SER | 30 | -14.842 | 8.202  | -12.889 | 0.00 | 0.00 | C |
| ATOM  | 484 | OG   | SER | 30 | -15.114 | 6.818  | -12.944 | 0.00 | 0.00 | O |
| ATOM  | 485 | H    | SER | 30 | -12.206 | 7.118  | -13.816 | 0.00 | 0.00 | H |
| ATOM  | 486 | HA   | SER | 30 | -13.227 | 9.555  | -12.531 | 0.00 | 0.00 | H |
| ATOM  | 487 | ZHB  | SER | 30 | -15.412 | 8.637  | -12.067 | 0.00 | 0.00 | H |
| ATOM  | 488 | ZHB  | SER | 30 | -15.164 | 8.668  | -13.820 | 0.00 | 0.00 | H |
| ATOM  | 489 | HG   | SER | 30 | -16.057 | 6.697  | -13.078 | 0.00 | 0.00 | H |
| ATOM  | 490 | N    | GLU | 31 | -13.172 | 8.350  | -10.233 | 0.00 | 0.00 | N |
| ATOM  | 491 | CA   | GLU | 31 | -12.718 | 7.858  | -8.933  | 0.00 | 0.00 | C |
| ATOM  | 492 | C    | GLU | 31 | -13.286 | 6.477  | -8.573  | 0.00 | 0.00 | C |
| ATOM  | 493 | O    | GLU | 31 | -12.709 | 5.803  | -7.722  | 0.00 | 0.00 | O |
| ATOM  | 494 | CB   | GLU | 31 | -13.049 | 8.901  | -7.853  | 0.00 | 0.00 | C |
| ATOM  | 495 | CG   | GLU | 31 | -14.551 | 9.036  | -7.553  | 0.00 | 0.00 | C |

|      |     |      |     |    |         |        |         |      |      |   |
|------|-----|------|-----|----|---------|--------|---------|------|------|---|
| ATOM | 496 | CD   | GLU | 31 | -14.832 | 10.196 | -6.600  | 0.00 | 0.00 | C |
| ATOM | 497 | OE1  | GLU | 31 | -14.283 | 10.171 | -5.476  | 0.00 | 0.00 | O |
| ATOM | 498 | OE2  | GLU | 31 | -15.599 | 11.093 | -7.013  | 0.00 | 0.00 | O |
| ATOM | 499 | H    | GLU | 31 | -13.746 | 9.180  | -10.237 | 0.00 | 0.00 | H |
| ATOM | 500 | HA   | GLU | 31 | -11.633 | 7.768  | -8.981  | 0.00 | 0.00 | H |
| ATOM | 501 | ZHB  | GLU | 31 | -12.527 | 8.629  | -6.934  | 0.00 | 0.00 | H |
| ATOM | 502 | ZHB  | GLU | 31 | -12.676 | 9.870  | -8.183  | 0.00 | 0.00 | H |
| ATOM | 503 | ZHG  | GLU | 31 | -15.093 | 9.200  | -8.485  | 0.00 | 0.00 | H |
| ATOM | 504 | ZHG  | GLU | 31 | -14.921 | 8.116  | -7.102  | 0.00 | 0.00 | H |
| ATOM | 505 | N    | GLU | 32 | -14.387 | 6.057  | -9.217  | 0.00 | 0.00 | N |
| ATOM | 506 | CA   | GLU | 32 | -15.027 | 4.760  | -9.019  | 0.00 | 0.00 | C |
| ATOM | 507 | C    | GLU | 32 | -14.363 | 3.682  | -9.882  | 0.00 | 0.00 | C |
| ATOM | 508 | O    | GLU | 32 | -14.205 | 2.552  | -9.422  | 0.00 | 0.00 | O |
| ATOM | 509 | CB   | GLU | 32 | -16.523 | 4.870  | -9.359  | 0.00 | 0.00 | C |
| ATOM | 510 | CG   | GLU | 32 | -17.283 | 5.790  | -8.392  | 0.00 | 0.00 | C |
| ATOM | 511 | CD   | GLU | 32 | -18.761 | 5.881  | -8.763  | 0.00 | 0.00 | C |
| ATOM | 512 | OE1  | GLU | 32 | -19.084 | 6.738  | -9.616  | 0.00 | 0.00 | O |
| ATOM | 513 | OE2  | GLU | 32 | -19.545 | 5.092  | -8.191  | 0.00 | 0.00 | O |
| ATOM | 514 | H    | GLU | 32 | -14.807 | 6.668  | -9.904  | 0.00 | 0.00 | H |
| ATOM | 515 | HA   | GLU | 32 | -14.934 | 4.469  | -7.972  | 0.00 | 0.00 | H |
| ATOM | 516 | ZHB  | GLU | 32 | -16.635 | 5.243  | -10.378 | 0.00 | 0.00 | H |
| ATOM | 517 | ZHB  | GLU | 32 | -16.967 | 3.875  | -9.307  | 0.00 | 0.00 | H |
| ATOM | 518 | ZHG  | GLU | 32 | -17.189 | 5.398  | -7.379  | 0.00 | 0.00 | H |
| ATOM | 519 | ZHG  | GLU | 32 | -16.850 | 6.792  | -8.416  | 0.00 | 0.00 | H |
| ATOM | 520 | N    | GLN | 33 | -13.940 | 4.039  | -11.105 | 0.00 | 0.00 | N |
| ATOM | 521 | CA   | GLN | 33 | -13.176 | 3.174  | -12.001 | 0.00 | 0.00 | C |
| ATOM | 522 | C    | GLN | 33 | -11.737 | 2.984  | -11.506 | 0.00 | 0.00 | C |
| ATOM | 523 | O    | GLN | 33 | -11.114 | 1.978  | -11.843 | 0.00 | 0.00 | O |
| ATOM | 524 | CB   | GLN | 33 | -13.150 | 3.795  | -13.406 | 0.00 | 0.00 | C |
| ATOM | 525 | CG   | GLN | 33 | -14.516 | 3.754  | -14.109 | 0.00 | 0.00 | C |
| ATOM | 526 | CD   | GLN | 33 | -14.535 | 4.525  | -15.434 | 0.00 | 0.00 | C |
| ATOM | 527 | NE2  | GLN | 33 | -15.690 | 4.520  | -16.106 | 0.00 | 0.00 | N |
| ATOM | 528 | OE1  | GLN | 33 | -13.542 | 5.121  | -15.850 | 0.00 | 0.00 | O |
| ATOM | 529 | H    | GLN | 33 | -14.104 | 4.986  | -11.418 | 0.00 | 0.00 | H |
| ATOM | 530 | HA   | GLN | 33 | -13.658 | 2.196  | -12.055 | 0.00 | 0.00 | H |
| ATOM | 531 | ZHB  | GLN | 33 | -12.806 | 4.828  | -13.329 | 0.00 | 0.00 | H |
| ATOM | 532 | ZHB  | GLN | 33 | -12.439 | 3.243  | -14.023 | 0.00 | 0.00 | H |
| ATOM | 533 | ZHG  | GLN | 33 | -14.782 | 2.714  | -14.301 | 0.00 | 0.00 | H |
| ATOM | 534 | ZHG  | GLN | 33 | -15.280 | 4.175  | -13.455 | 0.00 | 0.00 | H |
| ATOM | 535 | 1HE2 | GLN | 33 | -15.763 | 5.013  | -16.983 | 0.00 | 0.00 | H |
| ATOM | 536 | 2HE2 | GLN | 33 | -16.486 | 4.022  | -15.735 | 0.00 | 0.00 | H |
| ATOM | 537 | N    | VAL | 34 | -11.223 | 3.935  | -10.711 | 0.00 | 0.00 | N |
| ATOM | 538 | CA   | VAL | 34 | -9.868  | 3.933  | -10.173 | 0.00 | 0.00 | C |
| ATOM | 539 | C    | VAL | 34 | -9.838  | 3.385  | -8.740  | 0.00 | 0.00 | C |
| ATOM | 540 | O    | VAL | 34 | -8.767  | 2.996  | -8.282  | 0.00 | 0.00 | O |
| ATOM | 541 | CB   | VAL | 34 | -9.251  | 5.339  | -10.341 | 0.00 | 0.00 | C |
| ATOM | 542 | CG1  | VAL | 34 | -7.883  | 5.503  | -9.664  | 0.00 | 0.00 | C |
| ATOM | 543 | CG2  | VAL | 34 | -9.039  | 5.616  | -11.837 | 0.00 | 0.00 | C |
| ATOM | 544 | H    | VAL | 34 | -11.800 | 4.729  | -10.475 | 0.00 | 0.00 | H |
| ATOM | 545 | HA   | VAL | 34 | -9.271  | 3.252  | -10.774 | 0.00 | 0.00 | H |
| ATOM | 546 | HB   | VAL | 34 | -9.931  | 6.084  | -9.927  | 0.00 | 0.00 | H |
| ATOM | 547 | 1HG1 | VAL | 34 | -7.483  | 6.486  | -9.907  | 0.00 | 0.00 | H |
| ATOM | 548 | 2HG1 | VAL | 34 | -7.980  | 5.439  | -8.582  | 0.00 | 0.00 | H |
| ATOM | 549 | 3HG1 | VAL | 34 | -7.194  | 4.737  | -10.019 | 0.00 | 0.00 | H |
| ATOM | 550 | 1HG2 | VAL | 34 | -8.553  | 6.577  | -11.976 | 0.00 | 0.00 | H |
| ATOM | 551 | 2HG2 | VAL | 34 | -8.403  | 4.843  | -12.265 | 0.00 | 0.00 | H |
| ATOM | 552 | 3HG2 | VAL | 34 | -9.990  | 5.630  | -12.368 | 0.00 | 0.00 | H |
| ATOM | 553 | N    | ALA | 35 | -10.992 | 3.265  | -8.065  | 0.00 | 0.00 | N |
| ATOM | 554 | CA   | ALA | 35 | -11.130 | 2.459  | -6.856  | 0.00 | 0.00 | C |
| ATOM | 555 | C    | ALA | 35 | -11.155 | 0.960  | -7.197  | 0.00 | 0.00 | C |
| ATOM | 556 | O    | ALA | 35 | -10.728 | 0.146  | -6.381  | 0.00 | 0.00 | O |
| ATOM | 557 | CB   | ALA | 35 | -12.397 | 2.884  | -6.109  | 0.00 | 0.00 | C |
| ATOM | 558 | H    | ALA | 35 | -11.844 | 3.610  | -8.485  | 0.00 | 0.00 | H |
| ATOM | 559 | HA   | ALA | 35 | -10.278 | 2.652  | -6.204  | 0.00 | 0.00 | H |
| ATOM | 560 | 1HB  | ALA | 35 | -13.273 | 2.745  | -6.743  | 0.00 | 0.00 | H |
| ATOM | 561 | ZHB  | ALA | 35 | -12.511 | 2.289  | -5.205  | 0.00 | 0.00 | H |
| ATOM | 562 | ZHB  | ALA | 35 | -12.313 | 3.933  | -5.827  | 0.00 | 0.00 | H |
| ATOM | 563 | N    | GLN | 36 | -11.592 | 0.599  | -8.415  | 0.00 | 0.00 | N |
| ATOM | 564 | CA   | GLN | 36 | -11.479 | -0.753 | -8.955  | 0.00 | 0.00 | C |
| ATOM | 565 | C    | GLN | 36 | -10.045 | -1.044 | -9.424  | 0.00 | 0.00 | C |
| ATOM | 566 | O    | GLN | 36 | -9.645  | -2.209 | -9.434  | 0.00 | 0.00 | O |
| ATOM | 567 | CB   | GLN | 36 | -12.477 | -0.927 | -10.111 | 0.00 | 0.00 | C |
| ATOM | 568 | CG   | GLN | 36 | -13.936 | -0.933 | -9.633  | 0.00 | 0.00 | C |
| ATOM | 569 | CD   | GLN | 36 | -14.907 | -0.931 | -10.813 | 0.00 | 0.00 | C |
| ATOM | 570 | NE2  | GLN | 36 | -15.168 | -2.108 | -11.388 | 0.00 | 0.00 | N |
| ATOM | 571 | OE1  | GLN | 36 | -15.404 | 0.121  | -11.209 | 0.00 | 0.00 | O |
| ATOM | 572 | H    | GLN | 36 | -11.936 | 1.314  | -9.041  | 0.00 | 0.00 | H |
| ATOM | 573 | HA   | GLN | 36 | -11.734 | -1.469 | -8.173  | 0.00 | 0.00 | H |
| ATOM | 574 | ZHB  | GLN | 36 | -12.337 | -0.122 | -10.834 | 0.00 | 0.00 | H |
| ATOM | 575 | ZHB  | GLN | 36 | -12.277 | -1.873 | -10.614 | 0.00 | 0.00 | H |
| ATOM | 576 | ZHG  | GLN | 36 | -14.107 | -1.820 | -9.020  | 0.00 | 0.00 | H |
| ATOM | 577 | ZHG  | GLN | 36 | -14.132 | -0.057 | -9.015  | 0.00 | 0.00 | H |
| ATOM | 578 | 1HE2 | GLN | 36 | -14.734 | -2.949 | -11.037 | 0.00 | 0.00 | H |
| ATOM | 579 | 2HE2 | GLN | 36 | -15.799 | -2.154 | -12.175 | 0.00 | 0.00 | H |
| ATOM | 580 | N    | ASP | 37 | -9.265  | -0.003 | -9.764  | 0.00 | 0.00 | N |
| ATOM | 581 | CA   | ASP | 37 | -7.843  | -0.121 | -10.076 | 0.00 | 0.00 | C |
| ATOM | 582 | C    | ASP | 37 | -6.988  | -0.134 | -8.803  | 0.00 | 0.00 | C |
| ATOM | 583 | O    | ASP | 37 | -5.887  | -0.680 | -8.838  | 0.00 | 0.00 | O |
| ATOM | 584 | CB   | ASP | 37 | -7.401  | 1.022  | -11.002 | 0.00 | 0.00 | C |
| ATOM | 585 | CG   | ASP | 37 | -8.130  | 1.084  | -12.348 | 0.00 | 0.00 | C |
| ATOM | 586 | OD1  | ASP | 37 | -8.160  | 2.198  | -12.916 | 0.00 | 0.00 | O |
| ATOM | 587 | OD2  | ASP | 37 | -8.624  | 0.031  | -12.808 | 0.00 | 0.00 | O |
| ATOM | 588 | H    | ASP | 37 | -9.654  | 0.929  | -9.742  | 0.00 | 0.00 | H |
| ATOM | 589 | HA   | ASP | 37 | -7.676  | -1.063 | -10.601 | 0.00 | 0.00 | H |
| ATOM | 590 | ZHB  | ASP | 37 | -7.533  | 1.967  | -10.478 | 0.00 | 0.00 | H |
| ATOM | 591 | ZHB  | ASP | 37 | -6.337  | 0.905  | -11.200 | 0.00 | 0.00 | H |
| ATOM | 592 | N    | THR | 38 | -7.489  | 0.414  | -7.681  | 0.00 | 0.00 | N |
| ATOM | 593 | CA   | THR | 38 | -6.850  | 0.307  | -6.370  | 0.00 | 0.00 | C |
| ATOM | 594 | C    | THR | 38 | -6.911  | -1.145 | -5.881  | 0.00 | 0.00 | C |
| ATOM | 595 | O    | THR | 38 | -6.000  | -1.576 | -5.182  | 0.00 | 0.00 | O |
| ATOM | 596 | CB   | THR | 38 | -7.535  | 1.256  | -5.360  | 0.00 | 0.00 | C |
| ATOM | 597 | CG2  | THR | 38 | -6.928  | 1.174  | -3.951  | 0.00 | 0.00 | C |
| ATOM | 598 | OG1  | THR | 38 | -7.436  | 2.598  | -5.782  | 0.00 | 0.00 | O |
| ATOM | 599 | H    | THR | 38 | -8.397  | 0.853  | -7.714  | 0.00 | 0.00 | H |
| ATOM | 600 | HA   | THR | 38 | -5.802  | 0.600  | -6.466  | 0.00 | 0.00 | H |

|      |     |      |     |    |         |        |         |      |      |   |
|------|-----|------|-----|----|---------|--------|---------|------|------|---|
| ATOM | 601 | HB   | THR | 38 | -8.591  | 0.999  | -5.290  | 0.00 | 0.00 | H |
| ATOM | 602 | 1HG  | THR | 38 | -7.882  | 2.685  | -6.627  | 0.00 | 0.00 | H |
| ATOM | 603 | 1HG2 | THR | 38 | -7.385  | 1.930  | -3.313  | 0.00 | 0.00 | H |
| ATOM | 604 | 2HG2 | THR | 38 | -7.125  | 0.198  | -3.508  | 0.00 | 0.00 | H |
| ATOM | 605 | 3HG2 | THR | 38 | -5.851  | 1.338  | -3.996  | 0.00 | 0.00 | H |
| ATOM | 606 | N    | GLU | 39 | -7.957  | -1.897 | -6.259  | 0.00 | 0.00 | N |
| ATOM | 607 | CA   | GLU | 39 | -8.192  | -3.256 | -5.791  | 0.00 | 0.00 | C |
| ATOM | 608 | C    | GLU | 39 | -7.160  | -4.233 | -6.367  | 0.00 | 0.00 | C |
| ATOM | 609 | O    | GLU | 39 | -6.657  | -5.081 | -5.632  | 0.00 | 0.00 | O |
| ATOM | 610 | CB   | GLU | 39 | -9.630  | -3.658 | -6.163  | 0.00 | 0.00 | C |
| ATOM | 611 | CG   | GLU | 39 | -10.108 | -4.873 | -5.361  | 0.00 | 0.00 | C |
| ATOM | 612 | CD   | GLU | 39 | -11.509 | -5.309 | -5.784  | 0.00 | 0.00 | C |
| ATOM | 613 | OE1  | GLU | 39 | -12.475 | -4.800 | -5.176  | 0.00 | 0.00 | O |
| ATOM | 614 | OE2  | GLU | 39 | -11.588 | -6.150 | -6.707  | 0.00 | 0.00 | O |
| ATOM | 615 | H    | GLU | 39 | -8.663  | -1.489 | -6.856  | 0.00 | 0.00 | H |
| ATOM | 616 | HA   | GLU | 39 | -8.103  | -3.256 | -4.704  | 0.00 | 0.00 | H |
| ATOM | 617 | 2HB  | GLU | 39 | -10.305 | -2.826 | -5.957  | 0.00 | 0.00 | H |
| ATOM | 618 | 3HB  | GLU | 39 | -9.680  | -3.883 | -7.230  | 0.00 | 0.00 | H |
| ATOM | 619 | 2HG  | GLU | 39 | -9.418  | -5.700 | -5.508  | 0.00 | 0.00 | H |
| ATOM | 620 | 3HG  | GLU | 39 | -10.117 | -4.624 | -4.301  | 0.00 | 0.00 | H |
| ATOM | 621 | N    | GLU | 40 | -6.823  | -4.094 | -7.659  | 0.00 | 0.00 | N |
| ATOM | 622 | CA   | GLU | 40 | -5.914  | -4.988 | -8.370  | 0.00 | 0.00 | C |
| ATOM | 623 | C    | GLU | 40 | -4.443  | -4.594 | -8.166  | 0.00 | 0.00 | C |
| ATOM | 624 | O    | GLU | 40 | -3.585  | -5.478 | -8.144  | 0.00 | 0.00 | O |
| ATOM | 625 | CB   | GLU | 40 | -6.328  | -5.004 | -9.851  | 0.00 | 0.00 | C |
| ATOM | 626 | CG   | GLU | 40 | -5.533  | -5.995 | -10.714 | 0.00 | 0.00 | C |
| ATOM | 627 | CD   | GLU | 40 | -5.698  | -7.449 | -10.269 | 0.00 | 0.00 | C |
| ATOM | 628 | OE1  | GLU | 40 | -6.812  | -7.980 | -10.463 | 0.00 | 0.00 | O |
| ATOM | 629 | OE2  | GLU | 40 | -4.705  | -8.009 | -9.752  | 0.00 | 0.00 | O |
| ATOM | 630 | H    | GLU | 40 | -7.257  | -3.359 | -8.200  | 0.00 | 0.00 | H |
| ATOM | 631 | HA   | GLU | 40 | -6.047  | -5.995 | -7.973  | 0.00 | 0.00 | H |
| ATOM | 632 | 2HB  | GLU | 40 | -7.387  | -5.259 | -9.921  | 0.00 | 0.00 | H |
| ATOM | 633 | 3HB  | GLU | 40 | -6.198  | -4.003 | -10.263 | 0.00 | 0.00 | H |
| ATOM | 634 | 2HG  | GLU | 40 | -5.870  | -5.908 | -11.747 | 0.00 | 0.00 | H |
| ATOM | 635 | 3HG  | GLU | 40 | -4.482  | -5.726 | -10.680 | 0.00 | 0.00 | H |
| ATOM | 636 | N    | VAL | 41 | -4.152  | -3.296 | -7.968  | 0.00 | 0.00 | N |
| ATOM | 637 | CA   | VAL | 41 | -2.813  | -2.804 | -7.641  | 0.00 | 0.00 | C |
| ATOM | 638 | C    | VAL | 41 | -2.447  | -3.167 | -6.194  | 0.00 | 0.00 | C |
| ATOM | 639 | O    | VAL | 41 | -1.273  | -3.416 | -5.928  | 0.00 | 0.00 | O |
| ATOM | 640 | CB   | VAL | 41 | -2.734  | -1.281 | -7.905  | 0.00 | 0.00 | C |
| ATOM | 641 | CG1  | VAL | 41 | -1.445  | -0.647 | -7.356  | 0.00 | 0.00 | C |
| ATOM | 642 | CG2  | VAL | 41 | -2.782  | -0.979 | -9.412  | 0.00 | 0.00 | C |
| ATOM | 643 | H    | VAL | 41 | -4.900  | -2.618 | -7.994  | 0.00 | 0.00 | H |
| ATOM | 644 | HA   | VAL | 41 | -2.095  | -3.297 | -8.298  | 0.00 | 0.00 | H |
| ATOM | 645 | HB   | VAL | 41 | -3.580  | -0.793 | -7.419  | 0.00 | 0.00 | H |
| ATOM | 646 | 1HG1 | VAL | 41 | -0.573  | -1.181 | -7.732  | 0.00 | 0.00 | H |
| ATOM | 647 | 2HG1 | VAL | 41 | -1.379  | 0.392  | -7.671  | 0.00 | 0.00 | H |
| ATOM | 648 | 3HG1 | VAL | 41 | -1.448  | -0.670 | -6.267  | 0.00 | 0.00 | H |
| ATOM | 649 | 1HG2 | VAL | 41 | -3.642  | -1.458 | -9.875  | 0.00 | 0.00 | H |
| ATOM | 650 | 2HG2 | VAL | 41 | -2.861  | 0.095  | -9.566  | 0.00 | 0.00 | H |
| ATOM | 651 | 3HG2 | VAL | 41 | -1.875  | -1.340 | -9.894  | 0.00 | 0.00 | H |
| ATOM | 652 | N    | PHE | 42 | -3.428  | -3.233 | -5.277  | 0.00 | 0.00 | N |
| ATOM | 653 | CA   | PHE | 42 | -3.199  | -3.583 | -3.879  | 0.00 | 0.00 | C |
| ATOM | 654 | C    | PHE | 42 | -2.940  | -5.083 | -3.719  | 0.00 | 0.00 | C |
| ATOM | 655 | O    | PHE | 42 | -2.043  | -5.448 | -2.964  | 0.00 | 0.00 | O |
| ATOM | 656 | CB   | PHE | 42 | -4.391  | -3.141 | -3.020  | 0.00 | 0.00 | C |
| ATOM | 657 | CG   | PHE | 42 | -4.217  | -3.411 | -1.536  | 0.00 | 0.00 | C |
| ATOM | 658 | CD1  | PHE | 42 | -3.766  | -2.387 | -0.682  | 0.00 | 0.00 | C |
| ATOM | 659 | CD2  | PHE | 42 | -4.485  | -4.689 | -1.007  | 0.00 | 0.00 | C |
| ATOM | 660 | CE1  | PHE | 42 | -3.574  | -2.638 | 0.684   | 0.00 | 0.00 | C |
| ATOM | 661 | CE2  | PHE | 42 | -4.302  | -4.938 | 0.364   | 0.00 | 0.00 | C |
| ATOM | 662 | CZ   | PHE | 42 | -3.845  | -3.912 | 1.206   | 0.00 | 0.00 | C |
| ATOM | 663 | H    | PHE | 42 | -4.378  | -3.031 | -5.555  | 0.00 | 0.00 | H |
| ATOM | 664 | HA   | PHE | 42 | -2.319  | -3.041 | -3.530  | 0.00 | 0.00 | H |
| ATOM | 665 | 2HB  | PHE | 42 | -4.534  | -2.069 | -3.152  | 0.00 | 0.00 | H |
| ATOM | 666 | 3HB  | PHE | 42 | -5.294  | -3.647 | -3.366  | 0.00 | 0.00 | H |
| ATOM | 667 | HD1  | PHE | 42 | -3.565  | -1.404 | -1.073  | 0.00 | 0.00 | H |
| ATOM | 668 | HD2  | PHE | 42 | -4.826  | -5.483 | -1.652  | 0.00 | 0.00 | H |
| ATOM | 669 | HE1  | PHE | 42 | -3.217  | -1.852 | 1.331   | 0.00 | 0.00 | H |
| ATOM | 670 | HE2  | PHE | 42 | -4.513  | -5.915 | 0.772   | 0.00 | 0.00 | H |
| ATOM | 671 | HZ   | PHE | 42 | -3.703  | -4.102 | 2.254   | 0.00 | 0.00 | H |
| ATOM | 672 | N    | ARG | 43 | -3.697  | -5.943 | -4.420  | 0.00 | 0.00 | N |
| ATOM | 673 | CA   | ARG | 43 | -3.560  | -7.396 | -4.325  | 0.00 | 0.00 | C |
| ATOM | 674 | C    | ARG | 43 | -2.273  | -7.901 | -4.988  | 0.00 | 0.00 | C |
| ATOM | 675 | O    | ARG | 43 | -1.788  | -8.967 | -4.612  | 0.00 | 0.00 | O |
| ATOM | 676 | CB   | ARG | 43 | -4.787  | -8.078 | -4.947  | 0.00 | 0.00 | C |
| ATOM | 677 | CG   | ARG | 43 | -6.012  | -7.970 | -4.028  | 0.00 | 0.00 | C |
| ATOM | 678 | CD   | ARG | 43 | -7.241  | -8.713 | -4.568  | 0.00 | 0.00 | C |
| ATOM | 679 | NE   | ARG | 43 | -7.955  | -7.956 | -5.607  | 0.00 | 0.00 | N |
| ATOM | 680 | CZ   | ARG | 43 | -7.783  | -8.040 | -6.939  | 0.00 | 0.00 | C |
| ATOM | 681 | NH1  | ARG | 43 | -6.867  | -8.849 | -7.486  | 0.00 | 0.00 | N |
| ATOM | 682 | NH2  | ARG | 43 | -8.549  | -7.293 | -7.744  | 0.00 | 0.00 | N |
| ATOM | 683 | H    | ARG | 43 | -4.416  | -5.582 | -5.032  | 0.00 | 0.00 | H |
| ATOM | 684 | HA   | ARG | 43 | -3.515  | -7.668 | -3.269  | 0.00 | 0.00 | H |
| ATOM | 685 | 2HB  | ARG | 43 | -4.997  | -7.627 | -5.917  | 0.00 | 0.00 | H |
| ATOM | 686 | 3HB  | ARG | 43 | -4.564  | -9.135 | -5.092  | 0.00 | 0.00 | H |
| ATOM | 687 | 2HG  | ARG | 43 | -5.759  | -8.404 | -3.062  | 0.00 | 0.00 | H |
| ATOM | 688 | 3HG  | ARG | 43 | -6.256  | -6.923 | -3.864  | 0.00 | 0.00 | H |
| ATOM | 689 | 2HD  | ARG | 43 | -6.950  | -9.694 | -4.938  | 0.00 | 0.00 | H |
| ATOM | 690 | 3HD  | ARG | 43 | -7.934  | -8.865 | -3.740  | 0.00 | 0.00 | H |
| ATOM | 691 | HE   | ARG | 43 | -8.662  | -7.315 | -5.275  | 0.00 | 0.00 | H |
| ATOM | 692 | 1HH1 | ARG | 43 | -6.278  | -9.418 | -6.894  | 0.00 | 0.00 | H |
| ATOM | 693 | 2HH1 | ARG | 43 | -6.758  | -8.883 | -8.489  | 0.00 | 0.00 | H |
| ATOM | 694 | 1HH2 | ARG | 43 | -9.247  | -6.678 | -7.351  | 0.00 | 0.00 | H |
| ATOM | 695 | 2HH2 | ARG | 43 | -8.425  | -7.342 | -8.746  | 0.00 | 0.00 | H |
| ATOM | 696 | N    | SER | 44 | -1.710  | -7.128 | -5.927  | 0.00 | 0.00 | N |
| ATOM | 697 | CA   | SER | 44 | -0.414  | -7.383 | -6.546  | 0.00 | 0.00 | C |
| ATOM | 698 | C    | SER | 44 | 0.731   | -6.729 | -5.757  | 0.00 | 0.00 | C |
| ATOM | 699 | O    | SER | 44 | 1.865   | -7.192 | -5.860  | 0.00 | 0.00 | O |
| ATOM | 700 | CB   | SER | 44 | -0.473  | -6.897 | -7.996  | 0.00 | 0.00 | C |
| ATOM | 701 | DG   | SER | 44 | -1.287  | -7.766 | -8.755  | 0.00 | 0.00 | O |
| ATOM | 702 | H    | SER | 44 | -2.174  | -6.270 | -6.188  | 0.00 | 0.00 | H |
| ATOM | 703 | HA   | SER | 44 | -0.228  | -8.457 | -6.560  | 0.00 | 0.00 | H |
| ATOM | 704 | 2HB  | SER | 44 | -0.893  | -5.893 | -8.033  | 0.00 | 0.00 | H |
| ATOM | 705 | 3HB  | SER | 44 | 0.526   | -6.882 | -8.426  | 0.00 | 0.00 | H |

|      |     |      |     |    |        |         |         |      |      |   |
|------|-----|------|-----|----|--------|---------|---------|------|------|---|
| ATOM | 706 | HG   | SER | 44 | -2.188 | -7.701  | -8.431  | 0.00 | 0.00 | H |
| ATOM | 707 | N    | TYR | 45 | 0.436  | -5.717  | -4.924  | 0.00 | 0.00 | N |
| ATOM | 708 | CA   | TYR | 45 | 1.352  | -5.183  | -3.916  | 0.00 | 0.00 | C |
| ATOM | 709 | C    | TYR | 45 | 1.255  | -5.961  | -2.584  | 0.00 | 0.00 | C |
| ATOM | 710 | O    | TYR | 45 | 1.893  | -5.585  | -1.602  | 0.00 | 0.00 | O |
| ATOM | 711 | CB   | TYR | 45 | 1.125  | -3.668  | -3.767  | 0.00 | 0.00 | C |
| ATOM | 712 | CG   | TYR | 45 | 2.185  | -2.974  | -2.932  | 0.00 | 0.00 | C |
| ATOM | 713 | CD1  | TYR | 45 | 3.486  | -2.818  | -3.445  | 0.00 | 0.00 | C |
| ATOM | 714 | CD2  | TYR | 45 | 1.900  | -2.568  | -1.615  | 0.00 | 0.00 | C |
| ATOM | 715 | CE1  | TYR | 45 | 4.503  | -2.280  | -2.639  | 0.00 | 0.00 | C |
| ATOM | 716 | CE2  | TYR | 45 | 2.922  | -2.055  | -0.799  | 0.00 | 0.00 | C |
| ATOM | 717 | CZ   | TYR | 45 | 4.232  | -1.910  | -1.305  | 0.00 | 0.00 | C |
| ATOM | 718 | OH   | TYR | 45 | 5.234  | -1.433  | -0.511  | 0.00 | 0.00 | O |
| ATOM | 719 | H    | TYR | 45 | -0.515 | -5.376  | -4.896  | 0.00 | 0.00 | H |
| ATOM | 720 | HA   | TYR | 45 | 2.367  | -5.317  | -4.289  | 0.00 | 0.00 | H |
| ATOM | 721 | ZHB  | TYR | 45 | 1.138  | -3.212  | -4.759  | 0.00 | 0.00 | H |
| ATOM | 722 | ZHB  | TYR | 45 | 0.141  | -3.493  | -3.330  | 0.00 | 0.00 | H |
| ATOM | 723 | HD1  | TYR | 45 | 3.708  | -3.135  | -4.453  | 0.00 | 0.00 | H |
| ATOM | 724 | HD2  | TYR | 45 | 0.906  | -2.693  | -1.212  | 0.00 | 0.00 | H |
| ATOM | 725 | HE1  | TYR | 45 | 5.504  | -2.179  | -3.021  | 0.00 | 0.00 | H |
| ATOM | 726 | HE2  | TYR | 45 | 2.713  | -1.797  | 0.224   | 0.00 | 0.00 | H |
| ATOM | 727 | HH   | TYR | 45 | 6.079  | -1.384  | -0.963  | 0.00 | 0.00 | H |
| ATOM | 728 | N    | VAL | 46 | 0.487  | -7.063  | -2.553  | 0.00 | 0.00 | N |
| ATOM | 729 | CA   | VAL | 46 | 0.458  | -8.041  | -1.470  | 0.00 | 0.00 | C |
| ATOM | 730 | C    | VAL | 46 | 1.145  | -9.321  | -1.952  | 0.00 | 0.00 | C |
| ATOM | 731 | O    | VAL | 46 | 1.963  | -9.872  | -1.218  | 0.00 | 0.00 | O |
| ATOM | 732 | CB   | VAL | 46 | -1.000 | -8.279  | -1.007  | 0.00 | 0.00 | C |
| ATOM | 733 | CG1  | VAL | 46 | -1.152 | -9.552  | -0.156  | 0.00 | 0.00 | C |
| ATOM | 734 | CG2  | VAL | 46 | -1.533 | -7.104  | -0.171  | 0.00 | 0.00 | C |
| ATOM | 735 | H    | VAL | 46 | -0.036 | -7.302  | -3.383  | 0.00 | 0.00 | H |
| ATOM | 736 | HA   | VAL | 46 | 1.025  | -7.668  | -0.620  | 0.00 | 0.00 | H |
| ATOM | 737 | HB   | VAL | 46 | -1.633 | -8.391  | -1.888  | 0.00 | 0.00 | H |
| ATOM | 738 | 1HG1 | VAL | 46 | -2.171 | -9.619  | 0.223   | 0.00 | 0.00 | H |
| ATOM | 739 | 2HG1 | VAL | 46 | -0.958 | -10.438 | -0.760  | 0.00 | 0.00 | H |
| ATOM | 740 | 3HG1 | VAL | 46 | -0.458 | -9.528  | 0.686   | 0.00 | 0.00 | H |
| ATOM | 741 | 1HG2 | VAL | 46 | -1.304 | -6.151  | -0.646  | 0.00 | 0.00 | H |
| ATOM | 742 | 2HG2 | VAL | 46 | -2.614 | -7.199  | -0.070  | 0.00 | 0.00 | H |
| ATOM | 743 | 3HG2 | VAL | 46 | -1.089 | -7.111  | 0.823   | 0.00 | 0.00 | H |
| ATOM | 744 | N    | PHE | 47 | 0.828  | -9.781  | -3.172  | 0.00 | 0.00 | N |
| ATOM | 745 | CA   | PHE | 47 | 1.277  | -11.067 | -3.686  | 0.00 | 0.00 | C |
| ATOM | 746 | C    | PHE | 47 | 2.731  | -11.008 | -4.160  | 0.00 | 0.00 | C |
| ATOM | 747 | O    | PHE | 47 | 3.530  | -11.822 | -3.702  | 0.00 | 0.00 | O |
| ATOM | 748 | CB   | PHE | 47 | 0.336  | -11.538 | -4.801  | 0.00 | 0.00 | C |
| ATOM | 749 | CG   | PHE | 47 | 0.758  | -12.847 | -5.442  | 0.00 | 0.00 | C |
| ATOM | 750 | CD1  | PHE | 47 | 0.838  | -14.019 | -4.664  | 0.00 | 0.00 | C |
| ATOM | 751 | CD2  | PHE | 47 | 1.109  | -12.890 | -6.805  | 0.00 | 0.00 | C |
| ATOM | 752 | CE1  | PHE | 47 | 1.279  | -15.222 | -5.243  | 0.00 | 0.00 | C |
| ATOM | 753 | CE2  | PHE | 47 | 1.540  | -14.096 | -7.385  | 0.00 | 0.00 | C |
| ATOM | 754 | CZ   | PHE | 47 | 1.629  | -15.261 | -6.603  | 0.00 | 0.00 | C |
| ATOM | 755 | H    | PHE | 47 | 0.166  | -9.265  | -3.735  | 0.00 | 0.00 | H |
| ATOM | 756 | HA   | PHE | 47 | 1.215  | -11.793 | -2.874  | 0.00 | 0.00 | H |
| ATOM | 757 | ZHB  | PHE | 47 | -0.667 | -11.660 | -4.390  | 0.00 | 0.00 | H |
| ATOM | 758 | ZHB  | PHE | 47 | 0.294  | -10.763 | -5.568  | 0.00 | 0.00 | H |
| ATOM | 759 | HD1  | PHE | 47 | 0.576  | -13.997 | -3.617  | 0.00 | 0.00 | H |
| ATOM | 760 | HD2  | PHE | 47 | 1.053  | -11.996 | -7.410  | 0.00 | 0.00 | H |
| ATOM | 761 | HE1  | PHE | 47 | 1.355  | -16.113 | -4.638  | 0.00 | 0.00 | H |
| ATOM | 762 | HE2  | PHE | 47 | 1.808  | -14.127 | -8.431  | 0.00 | 0.00 | H |
| ATOM | 763 | HZ   | PHE | 47 | 1.968  | -16.185 | -7.047  | 0.00 | 0.00 | H |
| ATOM | 764 | N    | TYR | 48 | 3.076  | -10.056 | -5.044  | 0.00 | 0.00 | N |
| ATOM | 765 | CA   | TYR | 48 | 4.430  | -9.929  | -5.578  | 0.00 | 0.00 | C |
| ATOM | 766 | C    | TYR | 48 | 5.385  | -9.236  | -4.600  | 0.00 | 0.00 | C |
| ATOM | 767 | O    | TYR | 48 | 6.593  | -9.422  | -4.722  | 0.00 | 0.00 | O |
| ATOM | 768 | CB   | TYR | 48 | 4.429  | -9.192  | -6.922  | 0.00 | 0.00 | C |
| ATOM | 769 | CG   | TYR | 48 | 3.613  | -9.855  | -8.015  | 0.00 | 0.00 | C |
| ATOM | 770 | CD1  | TYR | 48 | 3.974  | -11.131 | -8.491  | 0.00 | 0.00 | C |
| ATOM | 771 | CD2  | TYR | 48 | 2.518  | -9.181  | -8.587  | 0.00 | 0.00 | C |
| ATOM | 772 | CE1  | TYR | 48 | 3.236  | -11.738 | -9.521  | 0.00 | 0.00 | C |
| ATOM | 773 | CE2  | TYR | 48 | 1.782  | -9.773  | -9.626  | 0.00 | 0.00 | C |
| ATOM | 774 | CZ   | TYR | 48 | 2.134  | -11.060 | -10.095 | 0.00 | 0.00 | C |
| ATOM | 775 | OH   | TYR | 48 | 1.420  | -11.640 | -11.101 | 0.00 | 0.00 | O |
| ATOM | 776 | H    | TYR | 48 | 2.377  | -9.408  | -5.378  | 0.00 | 0.00 | H |
| ATOM | 777 | HA   | TYR | 48 | 4.811  | -10.933 | -5.762  | 0.00 | 0.00 | H |
| ATOM | 778 | ZHB  | TYR | 48 | 4.083  | -8.170  | -6.771  | 0.00 | 0.00 | H |
| ATOM | 779 | ZHB  | TYR | 48 | 5.459  | -9.130  | -7.274  | 0.00 | 0.00 | H |
| ATOM | 780 | HD1  | TYR | 48 | 4.825  | -11.645 | -8.069  | 0.00 | 0.00 | H |
| ATOM | 781 | HD2  | TYR | 48 | 2.257  | -8.193  | -8.246  | 0.00 | 0.00 | H |
| ATOM | 782 | HE1  | TYR | 48 | 3.518  | -12.717 | -9.879  | 0.00 | 0.00 | H |
| ATOM | 783 | HE2  | TYR | 48 | 0.956  | -9.238  | -10.070 | 0.00 | 0.00 | H |
| ATOM | 784 | HH   | TYR | 48 | 1.747  | -12.511 | -11.339 | 0.00 | 0.00 | H |
| ATOM | 785 | N    | ARG | 49 | 4.864  | -8.470  | -3.629  | 0.00 | 0.00 | N |
| ATOM | 786 | CA   | ARG | 49 | 5.676  | -7.824  | -2.605  | 0.00 | 0.00 | C |
| ATOM | 787 | C    | ARG | 49 | 6.143  | -8.846  | -1.559  | 0.00 | 0.00 | C |
| ATOM | 788 | O    | ARG | 49 | 7.281  | -8.765  | -1.101  | 0.00 | 0.00 | O |
| ATOM | 789 | CB   | ARG | 49 | 4.860  | -6.679  | -1.982  | 0.00 | 0.00 | C |
| ATOM | 790 | CG   | ARG | 49 | 5.657  | -5.810  | -0.999  | 0.00 | 0.00 | C |
| ATOM | 791 | CD   | ARG | 49 | 6.771  | -4.992  | -1.666  | 0.00 | 0.00 | C |
| ATOM | 792 | NE   | ARG | 49 | 7.979  | -4.957  | -0.830  | 0.00 | 0.00 | N |
| ATOM | 793 | CZ   | ARG | 49 | 9.098  | -5.675  | -1.035  | 0.00 | 0.00 | C |
| ATOM | 794 | NH1  | ARG | 49 | 9.258  | -6.460  | -2.108  | 0.00 | 0.00 | N |
| ATOM | 795 | NH2  | ARG | 49 | 10.082 | -5.608  | -0.135  | 0.00 | 0.00 | N |
| ATOM | 796 | H    | ARG | 49 | 3.863  | -8.351  | -3.573  | 0.00 | 0.00 | H |
| ATOM | 797 | HA   | ARG | 49 | 6.559  | -7.407  | -3.088  | 0.00 | 0.00 | H |
| ATOM | 798 | ZHB  | ARG | 49 | 4.473  | -6.037  | -2.776  | 0.00 | 0.00 | H |
| ATOM | 799 | ZHB  | ARG | 49 | 4.014  | -7.114  | -1.449  | 0.00 | 0.00 | H |
| ATOM | 800 | ZHG  | ARG | 49 | 4.972  | -5.117  | -0.511  | 0.00 | 0.00 | H |
| ATOM | 801 | ZHG  | ARG | 49 | 6.081  | -6.455  | -0.229  | 0.00 | 0.00 | H |
| ATOM | 802 | ZHD  | ARG | 49 | 7.008  | -5.398  | -2.647  | 0.00 | 0.00 | H |
| ATOM | 803 | ZHD  | ARG | 49 | 6.421  | -3.972  | -1.810  | 0.00 | 0.00 | H |
| ATOM | 804 | HE   | ARG | 49 | 7.937  | -4.375  | -0.006  | 0.00 | 0.00 | H |
| ATOM | 805 | 1HH1 | ARG | 49 | 8.527  | -6.525  | -2.802  | 0.00 | 0.00 | H |
| ATOM | 806 | 2HH1 | ARG | 49 | 10.113 | -6.984  | -2.227  | 0.00 | 0.00 | H |
| ATOM | 807 | 1HH2 | ARG | 49 | 9.981  | -5.025  | 0.682   | 0.00 | 0.00 | H |
| ATOM | 808 | 2HH2 | ARG | 49 | 10.930 | -6.140  | -0.275  | 0.00 | 0.00 | H |
| ATOM | 809 | N    | HIP | 50 | 5.293  | -9.830  | -1.228  | 0.00 | 0.00 | N |
| ATOM | 810 | CA   | HIP | 50 | 5.624  | -10.927 | -0.324  | 0.00 | 0.00 | C |

|      |     |      |     |    |        |         |        |      |      |   |
|------|-----|------|-----|----|--------|---------|--------|------|------|---|
| ATOM | 811 | C    | HIP | 50 | 6.462  | -12.009 | -1.021 | 0.00 | 0.00 | C |
| ATOM | 812 | O    | HIP | 50 | 7.232  | -12.691 | -0.351 | 0.00 | 0.00 | O |
| ATOM | 813 | CB   | HIP | 50 | 4.319  | -11.508 | 0.229  | 0.00 | 0.00 | C |
| ATOM | 814 | CG   | HIP | 50 | 4.511  | -12.517 | 1.330  | 0.00 | 0.00 | C |
| ATOM | 815 | CD2  | HIP | 50 | 4.743  | -12.235 | 2.649  | 0.00 | 0.00 | C |
| ATOM | 816 | ND1  | HIP | 50 | 4.458  | -13.892 | 1.196  | 0.00 | 0.00 | N |
| ATOM | 817 | CE1  | HIP | 50 | 4.660  | -14.432 | 2.411  | 0.00 | 0.00 | C |
| ATOM | 818 | NE2  | HIP | 50 | 4.835  | -13.444 | 3.308  | 0.00 | 0.00 | N |
| ATOM | 819 | H    | HIP | 50 | 4.374  | -9.844  | -1.648 | 0.00 | 0.00 | H |
| ATOM | 820 | HA   | HIP | 50 | 6.201  | -10.527 | 0.511  | 0.00 | 0.00 | H |
| ATOM | 821 | ZHB  | HIP | 50 | 3.710  | -10.696 | 0.627  | 0.00 | 0.00 | H |
| ATOM | 822 | 3HB  | HIP | 50 | 3.769  | -11.976 | -0.590 | 0.00 | 0.00 | H |
| ATOM | 823 | HD1  | HIP | 50 | 4.305  | -14.401 | 0.337  | 0.00 | 0.00 | H |
| ATOM | 824 | HD2  | HIP | 50 | 4.832  | -11.254 | 3.092  | 0.00 | 0.00 | H |
| ATOM | 825 | HE1  | HIP | 50 | 4.686  | -15.489 | 2.631  | 0.00 | 0.00 | H |
| ATOM | 826 | HE2  | HIP | 50 | 5.006  | -13.568 | 4.296  | 0.00 | 0.00 | H |
| ATOM | 827 | N    | GLN | 51 | 6.339  | -12.146 | -2.351 | 0.00 | 0.00 | N |
| ATOM | 828 | CA   | GLN | 51 | 7.106  | -13.090 | -3.158 | 0.00 | 0.00 | C |
| ATOM | 829 | C    | GLN | 51 | 8.556  | -12.618 | -3.338 | 0.00 | 0.00 | C |
| ATOM | 830 | O    | GLN | 51 | 9.457  | -13.450 | -3.405 | 0.00 | 0.00 | O |
| ATOM | 831 | CB   | GLN | 51 | 6.385  | -13.262 | -4.506 | 0.00 | 0.00 | C |
| ATOM | 832 | CG   | GLN | 51 | 7.058  | -14.282 | -5.435 | 0.00 | 0.00 | C |
| ATOM | 833 | CD   | GLN | 51 | 6.237  | -14.628 | -6.680 | 0.00 | 0.00 | C |
| ATOM | 834 | NE2  | GLN | 51 | 6.740  | -15.578 | -7.472 | 0.00 | 0.00 | N |
| ATOM | 835 | OE1  | GLN | 51 | 5.172  | -14.064 | -6.932 | 0.00 | 0.00 | O |
| ATOM | 836 | H    | GLN | 51 | 5.687  | -11.550 | -2.843 | 0.00 | 0.00 | H |
| ATOM | 837 | HA   | GLN | 51 | 7.113  | -14.054 | -2.648 | 0.00 | 0.00 | H |
| ATOM | 838 | ZHB  | GLN | 51 | 5.369  | -13.603 | -4.306 | 0.00 | 0.00 | H |
| ATOM | 839 | 3HB  | GLN | 51 | 6.345  | -12.301 | -5.017 | 0.00 | 0.00 | H |
| ATOM | 840 | ZHG  | GLN | 51 | 8.029  | -13.901 | -5.753 | 0.00 | 0.00 | H |
| ATOM | 841 | 3HG  | GLN | 51 | 7.222  | -15.198 | -4.875 | 0.00 | 0.00 | H |
| ATOM | 842 | 1HE2 | GLN | 51 | 6.244  | -15.856 | -8.305 | 0.00 | 0.00 | H |
| ATOM | 843 | ZHE2 | GLN | 51 | 7.614  | -16.025 | -7.231 | 0.00 | 0.00 | H |
| ATOM | 844 | N    | GLN | 52 | 8.782  | -11.296 | -3.371 | 0.00 | 0.00 | N |
| ATOM | 845 | CA   | GLN | 52 | 10.104 | -10.683 | -3.468 | 0.00 | 0.00 | C |
| ATOM | 846 | C    | GLN | 52 | 10.815 | -10.616 | -2.106 | 0.00 | 0.00 | C |
| ATOM | 847 | O    | GLN | 52 | 12.022 | -10.381 | -2.081 | 0.00 | 0.00 | O |
| ATOM | 848 | CB   | GLN | 52 | 9.958  | -9.285  | -4.090 | 0.00 | 0.00 | C |
| ATOM | 849 | CG   | GLN | 52 | 9.677  | -9.345  | -5.603 | 0.00 | 0.00 | C |
| ATOM | 850 | CD   | GLN | 52 | 9.299  | -7.983  | -6.198 | 0.00 | 0.00 | C |
| ATOM | 851 | NE2  | GLN | 52 | 8.736  | -7.991  | -7.409 | 0.00 | 0.00 | N |
| ATOM | 852 | OE1  | GLN | 52 | 9.508  | -6.939  | -5.585 | 0.00 | 0.00 | O |
| ATOM | 853 | H    | GLN | 52 | 7.994  | -10.668 | -3.304 | 0.00 | 0.00 | H |
| ATOM | 854 | HA   | GLN | 52 | 10.723 | -11.287 | -4.133 | 0.00 | 0.00 | H |
| ATOM | 855 | ZHB  | GLN | 52 | 9.144  | -8.761  | -3.588 | 0.00 | 0.00 | H |
| ATOM | 856 | 3HB  | GLN | 52 | 10.879 | -8.720  | -3.936 | 0.00 | 0.00 | H |
| ATOM | 857 | ZHG  | GLN | 52 | 10.564 | -9.718  | -6.115 | 0.00 | 0.00 | H |
| ATOM | 858 | 3HG  | GLN | 52 | 8.868  | -10.048 | -5.799 | 0.00 | 0.00 | H |
| ATOM | 859 | 1HE2 | GLN | 52 | 8.470  | -7.120  | -7.846 | 0.00 | 0.00 | H |
| ATOM | 860 | ZHE2 | GLN | 52 | 8.579  | -8.867  | -7.887 | 0.00 | 0.00 | H |
| ATOM | 861 | N    | GLU | 53 | 10.094 | -10.843 | -0.993 | 0.00 | 0.00 | N |
| ATOM | 862 | CA   | GLU | 53 | 10.652 | -10.921 | 0.358  | 0.00 | 0.00 | C |
| ATOM | 863 | C    | GLU | 53 | 10.900 | -12.372 | 0.791  | 0.00 | 0.00 | C |
| ATOM | 864 | O    | GLU | 53 | 11.775 | -12.605 | 1.621  | 0.00 | 0.00 | O |
| ATOM | 865 | CB   | GLU | 53 | 9.731  | -10.191 | 1.345  | 0.00 | 0.00 | C |
| ATOM | 866 | CG   | GLU | 53 | 9.853  | -8.671  | 1.179  | 0.00 | 0.00 | C |
| ATOM | 867 | CD   | GLU | 53 | 8.943  | -7.918  | 2.146  | 0.00 | 0.00 | C |
| ATOM | 868 | OE1  | GLU | 53 | 9.335  | -7.801  | 3.329  | 0.00 | 0.00 | O |
| ATOM | 869 | OE2  | GLU | 53 | 7.874  | -7.464  | 1.688  | 0.00 | 0.00 | O |
| ATOM | 870 | H    | GLU | 53 | 9.106  | -11.024 | -1.086 | 0.00 | 0.00 | H |
| ATOM | 871 | HA   | GLU | 53 | 11.617 | -10.414 | 0.372  | 0.00 | 0.00 | H |
| ATOM | 872 | ZHB  | GLU | 53 | 8.697  | -10.503 | 1.191  | 0.00 | 0.00 | H |
| ATOM | 873 | 3HB  | GLU | 53 | 10.024 | -10.449 | 2.364  | 0.00 | 0.00 | H |
| ATOM | 874 | ZHG  | GLU | 53 | 10.887 | -8.372  | 1.360  | 0.00 | 0.00 | H |
| ATOM | 875 | 3HG  | GLU | 53 | 9.598  | -8.397  | 0.156  | 0.00 | 0.00 | H |
| ATOM | 876 | N    | GLN | 54 | 10.186 | -13.341 | 0.198  | 0.00 | 0.00 | N |
| ATOM | 877 | CA   | GLN | 54 | 10.501 | -14.764 | 0.297  | 0.00 | 0.00 | C |
| ATOM | 878 | C    | GLN | 54 | 11.678 | -15.130 | -0.623 | 0.00 | 0.00 | C |
| ATOM | 879 | O    | GLN | 54 | 12.337 | -16.140 | -0.383 | 0.00 | 0.00 | O |
| ATOM | 880 | CB   | GLN | 54 | 9.258  | -15.586 | -0.076 | 0.00 | 0.00 | C |
| ATOM | 881 | CG   | GLN | 54 | 8.170  | -15.596 | 1.007  | 0.00 | 0.00 | C |
| ATOM | 882 | CD   | GLN | 54 | 6.908  | -16.325 | 0.530  | 0.00 | 0.00 | C |
| ATOM | 883 | NE2  | GLN | 54 | 6.437  | -17.301 | 1.310  | 0.00 | 0.00 | N |
| ATOM | 884 | OE1  | GLN | 54 | 6.360  | -16.012 | -0.526 | 0.00 | 0.00 | O |
| ATOM | 885 | H    | GLN | 54 | 9.468  | -13.080 | -0.463 | 0.00 | 0.00 | H |
| ATOM | 886 | HA   | GLN | 54 | 10.781 | -15.003 | 1.323  | 0.00 | 0.00 | H |
| ATOM | 887 | ZHB  | GLN | 54 | 8.844  | -15.190 | -1.003 | 0.00 | 0.00 | H |
| ATOM | 888 | 3HB  | GLN | 54 | 9.565  | -16.619 | -0.244 | 0.00 | 0.00 | H |
| ATOM | 889 | ZHG  | GLN | 54 | 8.569  | -16.088 | 1.895  | 0.00 | 0.00 | H |
| ATOM | 890 | 3HG  | GLN | 54 | 7.904  | -14.578 | 1.286  | 0.00 | 0.00 | H |
| ATOM | 891 | 1HE2 | GLN | 54 | 5.611  | -17.812 | 1.033  | 0.00 | 0.00 | H |
| ATOM | 892 | ZHE2 | GLN | 54 | 6.912  | -17.534 | 2.170  | 0.00 | 0.00 | H |
| ATOM | 893 | N    | GLU | 55 | 11.955 | -14.307 | -1.648 | 0.00 | 0.00 | N |
| ATOM | 894 | CA   | GLU | 55 | 13.092 | -14.448 | -2.551 | 0.00 | 0.00 | C |
| ATOM | 895 | C    | GLU | 55 | 14.284 | -13.585 | -2.097 | 0.00 | 0.00 | C |
| ATOM | 896 | O    | GLU | 55 | 15.404 | -13.823 | -2.548 | 0.00 | 0.00 | O |
| ATOM | 897 | CB   | GLU | 55 | 12.611 | -14.152 | -3.980 | 0.00 | 0.00 | C |
| ATOM | 898 | CG   | GLU | 55 | 13.619 | -14.553 | -5.065 | 0.00 | 0.00 | C |
| ATOM | 899 | CD   | GLU | 55 | 12.956 | -14.564 | -6.441 | 0.00 | 0.00 | C |
| ATOM | 900 | OE1  | GLU | 55 | 12.962 | -13.494 | -7.089 | 0.00 | 0.00 | O |
| ATOM | 901 | OE2  | GLU | 55 | 12.442 | -15.640 | -6.819 | 0.00 | 0.00 | O |
| ATOM | 902 | H    | GLU | 55 | 11.366 | -13.499 | -1.789 | 0.00 | 0.00 | H |
| ATOM | 903 | HA   | GLU | 55 | 13.421 | -15.486 | -2.523 | 0.00 | 0.00 | H |
| ATOM | 904 | ZHB  | GLU | 55 | 11.700 | -14.725 | -4.155 | 0.00 | 0.00 | H |
| ATOM | 905 | 3HB  | GLU | 55 | 12.375 | -13.092 | -4.076 | 0.00 | 0.00 | H |
| ATOM | 906 | ZHG  | GLU | 55 | 14.454 | -13.850 | -5.068 | 0.00 | 0.00 | H |
| ATOM | 907 | 3HG  | GLU | 55 | 14.010 | -15.549 | -4.852 | 0.00 | 0.00 | H |
| ATOM | 908 | N    | ALA | 56 | 14.066 | -12.654 | -1.151 | 0.00 | 0.00 | N |
| ATOM | 909 | CA   | ALA | 56 | 15.130 | -12.054 | -0.348 | 0.00 | 0.00 | C |
| ATOM | 910 | C    | ALA | 56 | 15.611 | -13.021 | 0.749  | 0.00 | 0.00 | C |
| ATOM | 911 | O    | ALA | 56 | 16.734 | -12.873 | 1.229  | 0.00 | 0.00 | O |
| ATOM | 912 | CB   | ALA | 56 | 14.636 | -10.736 | 0.257  | 0.00 | 0.00 | C |
| ATOM | 913 | H    | ALA | 56 | 13.119 | -12.490 | -0.840 | 0.00 | 0.00 | H |
| ATOM | 914 | HA   | ALA | 56 | 15.973 | -11.826 | -1.003 | 0.00 | 0.00 | H |
| ATOM | 915 | 1HB  | ALA | 56 | 14.303 | -10.065 | -0.535 | 0.00 | 0.00 | H |

|      |      |      |     |    |        |         |        |      |      |   |
|------|------|------|-----|----|--------|---------|--------|------|------|---|
| ATOM | 916  | ZHB  | ALA | 56 | 13.814 | -10.925 | 0.946  | 0.00 | 0.00 | H |
| ATOM | 917  | 3HB  | ALA | 56 | 15.450 | -10.258 | 0.802  | 0.00 | 0.00 | H |
| ATOM | 918  | N    | GLU | 57 | 14.791 | -14.029 | 1.098  | 0.00 | 0.00 | N |
| ATOM | 919  | CA   | GLU | 57 | 15.178 | -15.187 | 1.904  | 0.00 | 0.00 | C |
| ATOM | 920  | C    | GLU | 57 | 15.794 | -16.305 | 1.034  | 0.00 | 0.00 | C |
| ATOM | 921  | O    | GLU | 57 | 16.136 | -17.364 | 1.559  | 0.00 | 0.00 | O |
| ATOM | 922  | CB   | GLU | 57 | 13.968 | -15.683 | 2.717  | 0.00 | 0.00 | C |
| ATOM | 923  | CG   | GLU | 57 | 13.545 | -14.689 | 3.809  | 0.00 | 0.00 | C |
| ATOM | 924  | CD   | GLU | 57 | 12.259 | -15.144 | 4.498  | 0.00 | 0.00 | C |
| ATOM | 925  | OE1  | GLU | 57 | 11.176 | -14.776 | 3.992  | 0.00 | 0.00 | O |
| ATOM | 926  | OE2  | GLU | 57 | 12.379 | -15.857 | 5.519  | 0.00 | 0.00 | O |
| ATOM | 927  | H    | GLU | 57 | 13.874 | -14.066 | 0.676  | 0.00 | 0.00 | H |
| ATOM | 928  | HA   | GLU | 57 | 15.946 | -14.874 | 2.612  | 0.00 | 0.00 | H |
| ATOM | 929  | ZHB  | GLU | 57 | 13.128 | -15.861 | 2.048  | 0.00 | 0.00 | H |
| ATOM | 930  | 3HB  | GLU | 57 | 14.220 | -16.626 | 3.203  | 0.00 | 0.00 | H |
| ATOM | 931  | ZHG  | GLU | 57 | 14.344 | -14.606 | 4.546  | 0.00 | 0.00 | H |
| ATOM | 932  | 3HG  | GLU | 57 | 13.383 | -13.703 | 3.376  | 0.00 | 0.00 | H |
| ATOM | 933  | N    | GLY | 58 | 15.964 | -16.064 | -0.278 | 0.00 | 0.00 | N |
| ATOM | 934  | CA   | GLY | 58 | 16.698 | -16.921 | -1.202 | 0.00 | 0.00 | C |
| ATOM | 935  | C    | GLY | 58 | 15.881 | -18.059 | -1.823 | 0.00 | 0.00 | C |
| ATOM | 936  | O    | GLY | 58 | 16.448 | -18.831 | -2.596 | 0.00 | 0.00 | O |
| ATOM | 937  | H    | GLY | 58 | 15.644 | -15.180 | -0.648 | 0.00 | 0.00 | H |
| ATOM | 938  | ZHA  | GLY | 58 | 17.074 | -16.293 | -2.010 | 0.00 | 0.00 | H |
| ATOM | 939  | 3HA  | GLY | 58 | 17.555 | -17.350 | -0.681 | 0.00 | 0.00 | H |
| ATOM | 940  | N    | VAL | 59 | 14.579 | -18.172 | -1.513 | 0.00 | 0.00 | N |
| ATOM | 941  | CA   | VAL | 59 | 13.704 | -19.201 | -2.071 | 0.00 | 0.00 | C |
| ATOM | 942  | C    | VAL | 59 | 13.269 | -18.757 | -3.472 | 0.00 | 0.00 | C |
| ATOM | 943  | O    | VAL | 59 | 12.735 | -17.660 | -3.631 | 0.00 | 0.00 | O |
| ATOM | 944  | CB   | VAL | 59 | 12.497 | -19.476 | -1.144 | 0.00 | 0.00 | C |
| ATOM | 945  | CG1  | VAL | 59 | 11.691 | -20.682 | -1.658 | 0.00 | 0.00 | C |
| ATOM | 946  | CG2  | VAL | 59 | 12.924 | -19.754 | 0.309  | 0.00 | 0.00 | C |
| ATOM | 947  | H    | VAL | 59 | 14.164 | -17.508 | -0.873 | 0.00 | 0.00 | H |
| ATOM | 948  | HA   | VAL | 59 | 14.276 | -20.127 | -2.153 | 0.00 | 0.00 | H |
| ATOM | 949  | HB   | VAL | 59 | 11.842 | -18.606 | -1.143 | 0.00 | 0.00 | H |
| ATOM | 950  | 1HG1 | VAL | 59 | 10.829 | -20.854 | -1.012 | 0.00 | 0.00 | H |
| ATOM | 951  | 2HG1 | VAL | 59 | 11.329 | -20.496 | -2.669 | 0.00 | 0.00 | H |
| ATOM | 952  | 3HG1 | VAL | 59 | 12.316 | -21.576 | -1.663 | 0.00 | 0.00 | H |
| ATOM | 953  | 1HG2 | VAL | 59 | 13.626 | -20.588 | 0.340  | 0.00 | 0.00 | H |
| ATOM | 954  | 2HG2 | VAL | 59 | 13.393 | -18.871 | 0.744  | 0.00 | 0.00 | H |
| ATOM | 955  | 3HG2 | VAL | 59 | 12.048 | -20.000 | 0.911  | 0.00 | 0.00 | H |
| ATOM | 956  | N    | ALA | 60 | 13.497 | -19.615 | -4.477 | 0.00 | 0.00 | N |
| ATOM | 957  | CA   | ALA | 60 | 13.225 | -19.318 | -5.880 | 0.00 | 0.00 | C |
| ATOM | 958  | C    | ALA | 60 | 11.752 | -19.562 | -6.223 | 0.00 | 0.00 | C |
| ATOM | 959  | O    | ALA | 60 | 11.181 | -20.578 | -5.821 | 0.00 | 0.00 | O |
| ATOM | 960  | CB   | ALA | 60 | 14.150 | -20.151 | -6.771 | 0.00 | 0.00 | C |
| ATOM | 961  | H    | ALA | 60 | 13.926 | -20.506 | -4.272 | 0.00 | 0.00 | H |
| ATOM | 962  | HA   | ALA | 60 | 13.456 | -18.267 | -6.059 | 0.00 | 0.00 | H |
| ATOM | 963  | 1HB  | ALA | 60 | 15.191 | -19.929 | -6.530 | 0.00 | 0.00 | H |
| ATOM | 964  | ZHB  | ALA | 60 | 13.963 | -21.214 | -6.615 | 0.00 | 0.00 | H |
| ATOM | 965  | 3HB  | ALA | 60 | 13.969 | -19.904 | -7.818 | 0.00 | 0.00 | H |
| ATOM | 966  | N    | ALA | 61 | 11.167 | -18.620 | -6.983 | 0.00 | 0.00 | N |
| ATOM | 967  | CA   | ALA | 61 | 9.760  | -18.569 | -7.384 | 0.00 | 0.00 | C |
| ATOM | 968  | C    | ALA | 61 | 8.787  | -18.946 | -6.244 | 0.00 | 0.00 | C |
| ATOM | 969  | O    | ALA | 61 | 8.029  | -19.907 | -6.391 | 0.00 | 0.00 | O |
| ATOM | 970  | CB   | ALA | 61 | 9.567  | -19.398 | -8.663 | 0.00 | 0.00 | C |
| ATOM | 971  | H    | ALA | 61 | 11.733 | -17.834 | -7.270 | 0.00 | 0.00 | H |
| ATOM | 972  | HA   | ALA | 61 | 9.550  | -17.531 | -7.647 | 0.00 | 0.00 | H |
| ATOM | 973  | 1HB  | ALA | 61 | 9.776  | -20.450 | -8.464 | 0.00 | 0.00 | H |
| ATOM | 974  | ZHB  | ALA | 61 | 10.245 | -19.040 | -9.439 | 0.00 | 0.00 | H |
| ATOM | 975  | 3HB  | ALA | 61 | 8.541  | -19.295 | -9.018 | 0.00 | 0.00 | H |
| ATOM | 976  | N    | PRO | 62 | 8.827  | -18.255 | -5.084 | 0.00 | 0.00 | N |
| ATOM | 977  | CA   | PRO | 62 | 8.149  | -18.695 | -3.869 | 0.00 | 0.00 | C |
| ATOM | 978  | C    | PRO | 62 | 6.661  | -18.317 | -3.851 | 0.00 | 0.00 | C |
| ATOM | 979  | O    | PRO | 62 | 6.187  | -17.532 | -4.674 | 0.00 | 0.00 | O |
| ATOM | 980  | CB   | PRO | 62 | 8.926  | -18.035 | -2.730 | 0.00 | 0.00 | C |
| ATOM | 981  | CG   | PRO | 62 | 9.353  | -16.706 | -3.343 | 0.00 | 0.00 | C |
| ATOM | 982  | CD   | PRO | 62 | 9.604  | -17.051 | -4.809 | 0.00 | 0.00 | C |
| ATOM | 983  | HA   | PRO | 62 | 8.237  | -19.777 | -3.765 | 0.00 | 0.00 | H |
| ATOM | 984  | ZHB  | PRO | 62 | 9.810  | -18.629 | -2.503 | 0.00 | 0.00 | H |
| ATOM | 985  | 3HB  | PRO | 62 | 8.319  | -17.899 | -1.836 | 0.00 | 0.00 | H |
| ATOM | 986  | ZHG  | PRO | 62 | 8.534  | -15.995 | -3.259 | 0.00 | 0.00 | H |
| ATOM | 987  | 3HG  | PRO | 62 | 10.251 | -16.317 | -2.865 | 0.00 | 0.00 | H |
| ATOM | 988  | ZHD  | PRO | 62 | 9.298  | -16.230 | -5.454 | 0.00 | 0.00 | H |
| ATOM | 989  | 3HD  | PRO | 62 | 10.663 | -17.250 | -4.942 | 0.00 | 0.00 | H |
| ATOM | 990  | N    | ALA | 63 | 5.934  | -18.895 | -2.886 | 0.00 | 0.00 | N |
| ATOM | 991  | CA   | ALA | 63 | 4.518  | -18.643 | -2.638 | 0.00 | 0.00 | C |
| ATOM | 992  | C    | ALA | 63 | 4.167  | -18.950 | -1.177 | 0.00 | 0.00 | C |
| ATOM | 993  | O    | ALA | 63 | 4.931  | -19.610 | -0.468 | 0.00 | 0.00 | O |
| ATOM | 994  | CB   | ALA | 63 | 3.677  | -19.512 | -3.582 | 0.00 | 0.00 | C |
| ATOM | 995  | H    | ALA | 63 | 6.395  | -19.532 | -2.253 | 0.00 | 0.00 | H |
| ATOM | 996  | HA   | ALA | 63 | 4.299  | -17.593 | -2.837 | 0.00 | 0.00 | H |
| ATOM | 997  | 1HB  | ALA | 63 | 2.618  | -19.315 | -3.420 | 0.00 | 0.00 | H |
| ATOM | 998  | ZHB  | ALA | 63 | 3.918  | -19.278 | -4.620 | 0.00 | 0.00 | H |
| ATOM | 999  | 3HB  | ALA | 63 | 3.877  | -20.568 | -3.396 | 0.00 | 0.00 | H |
| ATOM | 1000 | N    | ASP | 64 | 2.978  | -18.498 | -0.753 | 0.00 | 0.00 | N |
| ATOM | 1001 | CA   | ASP | 64 | 2.370  | -18.839 | 0.530  | 0.00 | 0.00 | C |
| ATOM | 1002 | C    | ASP | 64 | 0.970  | -19.429 | 0.252  | 0.00 | 0.00 | C |
| ATOM | 1003 | O    | ASP | 64 | 0.244  | -18.831 | -0.544 | 0.00 | 0.00 | O |
| ATOM | 1004 | CB   | ASP | 64 | 2.333  | -17.594 | 1.435  | 0.00 | 0.00 | C |
| ATOM | 1005 | CG   | ASP | 64 | 2.387  | -17.955 | 2.921  | 0.00 | 0.00 | C |
| ATOM | 1006 | OD1  | ASP | 64 | 1.473  | -18.672 | 3.380  | 0.00 | 0.00 | O |
| ATOM | 1007 | OD2  | ASP | 64 | 3.347  | -17.503 | 3.582  | 0.00 | 0.00 | O |
| ATOM | 1008 | H    | ASP | 64 | 2.411  | -17.958 | -1.392 | 0.00 | 0.00 | H |
| ATOM | 1009 | HA   | ASP | 64 | 3.008  | -19.567 | 1.019  | 0.00 | 0.00 | H |
| ATOM | 1010 | ZHB  | ASP | 64 | 3.193  | -16.962 | 1.206  | 0.00 | 0.00 | H |
| ATOM | 1011 | 3HB  | ASP | 64 | 1.432  | -17.013 | 1.233  | 0.00 | 0.00 | H |
| ATOM | 1012 | N    | PRO | 65 | 0.565  | -20.570 | 0.861  | 0.00 | 0.00 | N |
| ATOM | 1013 | CA   | PRO | 65 | -0.649 | -21.302 | 0.469  | 0.00 | 0.00 | C |
| ATOM | 1014 | C    | PRO | 65 | -1.997 | -20.593 | 0.673  | 0.00 | 0.00 | C |
| ATOM | 1015 | O    | PRO | 65 | -3.003 | -21.103 | 0.178  | 0.00 | 0.00 | O |
| ATOM | 1016 | CB   | PRO | 65 | -0.624 | -22.611 | 1.267  | 0.00 | 0.00 | C |
| ATOM | 1017 | CG   | PRO | 65 | 0.862  | -22.852 | 1.489  | 0.00 | 0.00 | C |
| ATOM | 1018 | CD   | PRO | 65 | 1.382  | -21.436 | 1.708  | 0.00 | 0.00 | C |
| ATOM | 1019 | HA   | PRO | 65 | -0.550 | -21.548 | -0.589 | 0.00 | 0.00 | H |
| ATOM | 1020 | ZHB  | PRO | 65 | -1.087 | -23.428 | 0.713  | 0.00 | 0.00 | H |

|      |      |      |     |    |         |         |         |      |      |   |
|------|------|------|-----|----|---------|---------|---------|------|------|---|
| ATOM | 1021 | 3HB  | PRO | 65 | -1.117  | -22.474 | 2.231   | 0.00 | 0.00 | H |
| ATOM | 1022 | ZHG  | PRO | 65 | 1.046   | -23.490 | 2.355   | 0.00 | 0.00 | H |
| ATOM | 1023 | 3HG  | PRO | 65 | 1.309   | -23.278 | 0.590   | 0.00 | 0.00 | H |
| ATOM | 1024 | ZHD  | PRO | 65 | 1.249   | -21.156 | 2.752   | 0.00 | 0.00 | H |
| ATOM | 1025 | 3HD  | PRO | 65 | 2.436   | -21.414 | 1.441   | 0.00 | 0.00 | H |
| ATOM | 1026 | N    | GLU | 66 | -2.033  | -19.450 | 1.378   | 0.00 | 0.00 | N |
| ATOM | 1027 | CA   | GLU | 66 | -3.252  | -18.678 | 1.644   | 0.00 | 0.00 | C |
| ATOM | 1028 | C    | GLU | 66 | -3.156  | -17.232 | 1.120   | 0.00 | 0.00 | C |
| ATOM | 1029 | O    | GLU | 66 | -4.052  | -16.429 | 1.379   | 0.00 | 0.00 | O |
| ATOM | 1030 | CB   | GLU | 66 | -3.619  | -18.756 | 3.137   | 0.00 | 0.00 | C |
| ATOM | 1031 | CG   | GLU | 66 | -3.840  | -20.198 | 3.618   | 0.00 | 0.00 | C |
| ATOM | 1032 | CD   | GLU | 66 | -4.318  | -20.244 | 5.068   | 0.00 | 0.00 | C |
| ATOM | 1033 | OE1  | GLU | 66 | -3.456  | -20.078 | 5.960   | 0.00 | 0.00 | O |
| ATOM | 1034 | OE2  | GLU | 66 | -5.535  | -20.450 | 5.264   | 0.00 | 0.00 | O |
| ATOM | 1035 | H    | GLU | 66 | -1.172  | -19.086 | 1.758   | 0.00 | 0.00 | H |
| ATOM | 1036 | HA   | GLU | 66 | -4.076  | -19.136 | 1.095   | 0.00 | 0.00 | H |
| ATOM | 1037 | ZHB  | GLU | 66 | -2.830  | -18.295 | 3.734   | 0.00 | 0.00 | H |
| ATOM | 1038 | 3HB  | GLU | 66 | -4.543  | -18.201 | 3.297   | 0.00 | 0.00 | H |
| ATOM | 1039 | ZHG  | GLU | 66 | -4.583  | -20.678 | 2.978   | 0.00 | 0.00 | H |
| ATOM | 1040 | 3HG  | GLU | 66 | -2.909  | -20.762 | 3.543   | 0.00 | 0.00 | H |
| ATOM | 1041 | N    | MET | 67 | -2.095  | -16.916 | 0.360   | 0.00 | 0.00 | N |
| ATOM | 1042 | CA   | MET | 67 | -1.919  | -15.667 | -0.380  | 0.00 | 0.00 | C |
| ATOM | 1043 | C    | MET | 67 | -2.053  | -15.904 | -1.897  | 0.00 | 0.00 | C |
| ATOM | 1044 | O    | MET | 67 | -2.241  | -14.947 | -2.647  | 0.00 | 0.00 | O |
| ATOM | 1045 | CB   | MET | 67 | -0.567  | -15.053 | 0.014   | 0.00 | 0.00 | C |
| ATOM | 1046 | CG   | MET | 67 | -0.415  | -13.605 | -0.462  | 0.00 | 0.00 | C |
| ATOM | 1047 | SD   | MET | 67 | 1.024   | -12.736 | 0.209   | 0.00 | 0.00 | S |
| ATOM | 1048 | CE   | MET | 67 | 0.519   | -12.496 | 1.935   | 0.00 | 0.00 | C |
| ATOM | 1049 | H    | MET | 67 | -1.392  | -17.623 | 0.208   | 0.00 | 0.00 | H |
| ATOM | 1050 | HA   | MET | 67 | -2.702  | -14.969 | -0.083  | 0.00 | 0.00 | H |
| ATOM | 1051 | ZHB  | MET | 67 | -0.490  | -15.064 | 1.099   | 0.00 | 0.00 | H |
| ATOM | 1052 | 3HB  | MET | 67 | 0.245   | -15.656 | -0.397  | 0.00 | 0.00 | H |
| ATOM | 1053 | ZHG  | MET | 67 | -0.332  | -13.602 | -1.548  | 0.00 | 0.00 | H |
| ATOM | 1054 | 3HG  | MET | 67 | -1.309  | -13.046 | -0.194  | 0.00 | 0.00 | H |
| ATOM | 1055 | 1HE  | MET | 67 | 1.277   | -11.909 | 2.453   | 0.00 | 0.00 | H |
| ATOM | 1056 | 2HE  | MET | 67 | -0.433  | -11.967 | 1.968   | 0.00 | 0.00 | H |
| ATOM | 1057 | 3HE  | MET | 67 | 0.418   | -13.462 | 2.429   | 0.00 | 0.00 | H |
| ATOM | 1058 | N    | VAL | 68 | -2.019  | -17.172 | -2.340  | 0.00 | 0.00 | N |
| ATOM | 1059 | CA   | VAL | 68 | -2.429  | -17.590 | -3.681  | 0.00 | 0.00 | C |
| ATOM | 1060 | C    | VAL | 68 | -3.962  | -17.666 | -3.798  | 0.00 | 0.00 | C |
| ATOM | 1061 | O    | VAL | 68 | -4.478  | -17.620 | -4.914  | 0.00 | 0.00 | O |
| ATOM | 1062 | CB   | VAL | 68 | -1.770  | -18.935 | -4.065  | 0.00 | 0.00 | C |
| ATOM | 1063 | CG1  | VAL | 68 | -0.248  | -18.787 | -4.205  | 0.00 | 0.00 | C |
| ATOM | 1064 | CG2  | VAL | 68 | -2.103  | -20.078 | -3.091  | 0.00 | 0.00 | C |
| ATOM | 1065 | H    | VAL | 68 | -1.836  | -17.911 | -1.676  | 0.00 | 0.00 | H |
| ATOM | 1066 | HA   | VAL | 68 | -2.084  | -16.838 | -4.393  | 0.00 | 0.00 | H |
| ATOM | 1067 | HB   | VAL | 68 | -2.153  | -19.222 | -5.046  | 0.00 | 0.00 | H |
| ATOM | 1068 | 1HG1 | VAL | 68 | 0.200   | -18.491 | -3.257  | 0.00 | 0.00 | H |
| ATOM | 1069 | 2HG1 | VAL | 68 | -0.022  | -18.033 | -4.960  | 0.00 | 0.00 | H |
| ATOM | 1070 | 3HG1 | VAL | 68 | 0.189   | -19.734 | -4.524  | 0.00 | 0.00 | H |
| ATOM | 1071 | 1HG2 | VAL | 68 | -3.182  | -20.229 | -3.039  | 0.00 | 0.00 | H |
| ATOM | 1072 | 2HG2 | VAL | 68 | -1.644  | -21.005 | -3.438  | 0.00 | 0.00 | H |
| ATOM | 1073 | 3HG2 | VAL | 68 | -1.725  | -19.853 | -2.095  | 0.00 | 0.00 | H |
| ATOM | 1074 | N    | THR | 69 | -4.680  | -17.750 | -2.665  | 0.00 | 0.00 | N |
| ATOM | 1075 | CA   | THR | 69 | -6.143  | -17.722 | -2.608  | 0.00 | 0.00 | C |
| ATOM | 1076 | C    | THR | 69 | -6.694  | -16.288 | -2.708  | 0.00 | 0.00 | C |
| ATOM | 1077 | O    | THR | 69 | -7.888  | -16.118 | -2.954  | 0.00 | 0.00 | O |
| ATOM | 1078 | CB   | THR | 69 | -6.657  | -18.433 | -1.340  | 0.00 | 0.00 | C |
| ATOM | 1079 | CG2  | THR | 69 | -6.200  | -19.894 | -1.252  | 0.00 | 0.00 | C |
| ATOM | 1080 | OG1  | THR | 69 | -6.256  | -17.744 | -0.173  | 0.00 | 0.00 | O |
| ATOM | 1081 | H    | THR | 69 | -4.192  | -17.787 | -1.781  | 0.00 | 0.00 | H |
| ATOM | 1082 | HA   | THR | 69 | -6.522  | -18.277 | -3.468  | 0.00 | 0.00 | H |
| ATOM | 1083 | HB   | THR | 69 | -7.746  | -18.427 | -1.372  | 0.00 | 0.00 | H |
| ATOM | 1084 | 1HG  | THR | 69 | -5.298  | -17.757 | -0.124  | 0.00 | 0.00 | H |
| ATOM | 1085 | 1HG2 | THR | 69 | -6.513  | -20.432 | -2.147  | 0.00 | 0.00 | H |
| ATOM | 1086 | 2HG2 | THR | 69 | -5.114  | -19.951 | -1.162  | 0.00 | 0.00 | H |
| ATOM | 1087 | 3HG2 | THR | 69 | -6.653  | -20.367 | -0.380  | 0.00 | 0.00 | H |
| ATOM | 1088 | N    | LEU | 70 | -5.830  | -15.269 | -2.558  | 0.00 | 0.00 | N |
| ATOM | 1089 | CA   | LEU | 70 | -6.143  | -13.878 | -2.854  | 0.00 | 0.00 | C |
| ATOM | 1090 | C    | LEU | 70 | -6.282  | -13.726 | -4.381  | 0.00 | 0.00 | C |
| ATOM | 1091 | O    | LEU | 70 | -5.441  | -14.268 | -5.102  | 0.00 | 0.00 | O |
| ATOM | 1092 | CB   | LEU | 70 | -5.009  | -12.989 | -2.313  | 0.00 | 0.00 | C |
| ATOM | 1093 | CG   | LEU | 70 | -5.292  | -11.472 | -2.329  | 0.00 | 0.00 | C |
| ATOM | 1094 | CD1  | LEU | 70 | -6.367  | -11.070 | -1.305  | 0.00 | 0.00 | C |
| ATOM | 1095 | CD2  | LEU | 70 | -3.984  | -10.726 | -2.026  | 0.00 | 0.00 | C |
| ATOM | 1096 | H    | LEU | 70 | -4.866  | -15.479 | -2.341  | 0.00 | 0.00 | H |
| ATOM | 1097 | HA   | LEU | 70 | -7.067  | -13.628 | -2.338  | 0.00 | 0.00 | H |
| ATOM | 1098 | ZHB  | LEU | 70 | -4.783  | -13.290 | -1.288  | 0.00 | 0.00 | H |
| ATOM | 1099 | 3HB  | LEU | 70 | -4.120  | -13.177 | -2.915  | 0.00 | 0.00 | H |
| ATOM | 1100 | HG   | LEU | 70 | -5.625  | -11.176 | -3.323  | 0.00 | 0.00 | H |
| ATOM | 1101 | 1HD1 | LEU | 70 | -6.060  | -11.366 | -0.302  | 0.00 | 0.00 | H |
| ATOM | 1102 | 2HD1 | LEU | 70 | -6.513  | -9.990  | -1.326  | 0.00 | 0.00 | H |
| ATOM | 1103 | 3HD1 | LEU | 70 | -7.315  | -11.549 | -1.540  | 0.00 | 0.00 | H |
| ATOM | 1104 | 1HD2 | LEU | 70 | -4.161  | -9.653  | -1.975  | 0.00 | 0.00 | H |
| ATOM | 1105 | 2HD2 | LEU | 70 | -3.579  | -11.062 | -1.073  | 0.00 | 0.00 | H |
| ATOM | 1106 | 3HD2 | LEU | 70 | -3.253  | -10.921 | -2.812  | 0.00 | 0.00 | H |
| ATOM | 1107 | N    | PRO | 71 | -7.288  | -12.986 | -4.897  | 0.00 | 0.00 | N |
| ATOM | 1108 | CA   | PRO | 71 | -7.454  | -12.760 | -6.331  | 0.00 | 0.00 | C |
| ATOM | 1109 | C    | PRO | 71 | -6.240  | -12.071 | -6.961  | 0.00 | 0.00 | C |
| ATOM | 1110 | O    | PRO | 71 | -5.526  | -11.321 | -6.293  | 0.00 | 0.00 | O |
| ATOM | 1111 | CB   | PRO | 71 | -8.730  | -11.924 | -6.485  | 0.00 | 0.00 | C |
| ATOM | 1112 | CG   | PRO | 71 | -9.526  | -12.266 | -5.229  | 0.00 | 0.00 | C |
| ATOM | 1113 | CD   | PRO | 71 | -8.431  | -12.442 | -4.179  | 0.00 | 0.00 | C |
| ATOM | 1114 | HA   | PRO | 71 | -7.612  | -13.727 | -6.811  | 0.00 | 0.00 | H |
| ATOM | 1115 | ZHB  | PRO | 71 | -9.275  | -12.184 | -7.392  | 0.00 | 0.00 | H |
| ATOM | 1116 | 3HB  | PRO | 71 | -8.491  | -10.862 | -6.475  | 0.00 | 0.00 | H |
| ATOM | 1117 | ZHG  | PRO | 71 | -10.221 | -11.470 | -4.958  | 0.00 | 0.00 | H |
| ATOM | 1118 | 3HG  | PRO | 71 | -10.053 | -13.211 | -5.373  | 0.00 | 0.00 | H |
| ATOM | 1119 | ZHD  | PRO | 71 | -8.167  | -11.475 | -3.755  | 0.00 | 0.00 | H |
| ATOM | 1120 | 3HD  | PRO | 71 | -8.783  | -13.119 | -3.401  | 0.00 | 0.00 | H |
| ATOM | 1121 | N    | LEU | 72 | -6.005  | -12.346 | -8.252  | 0.00 | 0.00 | N |
| ATOM | 1122 | CA   | LEU | 72 | -4.884  | -11.804 | -9.013  | 0.00 | 0.00 | C |
| ATOM | 1123 | C    | LEU | 72 | -5.195  | -11.890 | -10.513 | 0.00 | 0.00 | C |
| ATOM | 1124 | O    | LEU | 72 | -5.833  | -12.841 | -10.968 | 0.00 | 0.00 | O |
| ATOM | 1125 | CB   | LEU | 72 | -3.594  | -12.593 | -8.672  | 0.00 | 0.00 | C |



|      |      |      |     |    |         |         |         |      |      |   |
|------|------|------|-----|----|---------|---------|---------|------|------|---|
| ATOM | 1126 | CG   | LEU | 72 | -2.311  | -11.761 | -8.462  | 0.00 | 0.00 | C |
| ATOM | 1127 | CD1  | LEU | 72 | -1.906  | -10.935 | -9.689  | 0.00 | 0.00 | C |
| ATOM | 1128 | CD2  | LEU | 72 | -2.404  | -10.844 | -7.234  | 0.00 | 0.00 | C |
| ATOM | 1129 | H    | LEU | 72 | -6.629  | -12.973 | -8.738  | 0.00 | 0.00 | H |
| ATOM | 1130 | HA   | LEU | 72 | -4.762  | -10.755 | -8.742  | 0.00 | 0.00 | H |
| ATOM | 1131 | ZHB  | LEU | 72 | -3.750  | -13.166 | -7.756  | 0.00 | 0.00 | H |
| ATOM | 1132 | 3HB  | LEU | 72 | -3.406  | -13.326 | -9.459  | 0.00 | 0.00 | H |
| ATOM | 1133 | HG   | LEU | 72 | -1.505  | -12.471 | -8.275  | 0.00 | 0.00 | H |
| ATOM | 1134 | 1HD1 | LEU | 72 | -1.890  | -11.567 | -10.574 | 0.00 | 0.00 | H |
| ATOM | 1135 | ZHD1 | LEU | 72 | -0.910  | -10.528 | -9.533  | 0.00 | 0.00 | H |
| ATOM | 1136 | 3HD1 | LEU | 72 | -2.597  | -10.107 | -9.838  | 0.00 | 0.00 | H |
| ATOM | 1137 | 1HD2 | LEU | 72 | -3.165  | -10.077 | -7.376  | 0.00 | 0.00 | H |
| ATOM | 1138 | ZHD2 | LEU | 72 | -2.643  | -11.433 | -6.348  | 0.00 | 0.00 | H |
| ATOM | 1139 | 3HD2 | LEU | 72 | -1.444  | -10.354 | -7.080  | 0.00 | 0.00 | H |
| ATOM | 1140 | N    | GLN | 73 | -4.692  | -10.911 | -11.276 | 0.00 | 0.00 | N |
| ATOM | 1141 | CA   | GLN | 73 | -4.730  | -10.877 | -12.733 | 0.00 | 0.00 | C |
| ATOM | 1142 | C    | GLN | 73 | -3.319  | -10.520 | -13.230 | 0.00 | 0.00 | C |
| ATOM | 1143 | O    | GLN | 73 | -3.014  | -9.336  | -13.385 | 0.00 | 0.00 | O |
| ATOM | 1144 | CB   | GLN | 73 | -5.782  | -9.862  | -13.209 | 0.00 | 0.00 | C |
| ATOM | 1145 | CG   | GLN | 73 | -7.226  | -10.276 | -12.883 | 0.00 | 0.00 | C |
| ATOM | 1146 | CD   | GLN | 73 | -8.266  | -9.238  | -13.318 | 0.00 | 0.00 | C |
| ATOM | 1147 | NE2  | GLN | 73 | -9.542  | -9.539  | -13.067 | 0.00 | 0.00 | N |
| ATOM | 1148 | OE1  | GLN | 73 | -7.940  | -8.186  | -13.865 | 0.00 | 0.00 | O |
| ATOM | 1149 | H    | GLN | 73 | -4.190  | -10.160 | -10.823 | 0.00 | 0.00 | H |
| ATOM | 1150 | HA   | GLN | 73 | -5.009  | -11.854 | -13.126 | 0.00 | 0.00 | H |
| ATOM | 1151 | ZHB  | GLN | 73 | -5.577  | -8.898  | -12.745 | 0.00 | 0.00 | H |
| ATOM | 1152 | 3HB  | GLN | 73 | -5.692  | -9.754  | -14.291 | 0.00 | 0.00 | H |
| ATOM | 1153 | ZHG  | GLN | 73 | -7.443  | -11.224 | -13.378 | 0.00 | 0.00 | H |
| ATOM | 1154 | 3HG  | GLN | 73 | -7.329  | -10.427 | -11.808 | 0.00 | 0.00 | H |
| ATOM | 1155 | 1HE2 | GLN | 73 | -9.776  | -10.410 | -12.613 | 0.00 | 0.00 | H |
| ATOM | 1156 | ZHE2 | GLN | 73 | -10.273 | -8.891  | -13.327 | 0.00 | 0.00 | H |
| ATOM | 1157 | N    | PRO | 74 | -2.442  | -11.516 | -13.480 | 0.00 | 0.00 | N |
| ATOM | 1158 | CA   | PRO | 74 | -1.069  | -11.290 | -13.937 | 0.00 | 0.00 | C |
| ATOM | 1159 | C    | PRO | 74 | -0.963  | -10.640 | -15.327 | 0.00 | 0.00 | C |
| ATOM | 1160 | O    | PRO | 74 | 0.095   | -10.104 | -15.657 | 0.00 | 0.00 | O |
| ATOM | 1161 | CB   | PRO | 74 | -0.408  | -12.675 | -13.953 | 0.00 | 0.00 | C |
| ATOM | 1162 | CG   | PRO | 74 | -1.229  | -13.488 | -12.957 | 0.00 | 0.00 | C |
| ATOM | 1163 | CD   | PRO | 74 | -2.632  | -12.926 | -13.165 | 0.00 | 0.00 | C |
| ATOM | 1164 | HA   | PRO | 74 | -0.562  | -10.662 | -13.203 | 0.00 | 0.00 | H |
| ATOM | 1165 | ZHB  | PRO | 74 | 0.643   | -12.624 | -13.664 | 0.00 | 0.00 | H |
| ATOM | 1166 | 3HB  | PRO | 74 | -0.505  | -13.126 | -14.943 | 0.00 | 0.00 | H |
| ATOM | 1167 | ZHG  | PRO | 74 | -1.186  | -14.556 | -13.169 | 0.00 | 0.00 | H |
| ATOM | 1168 | 3HG  | PRO | 74 | -0.892  | -13.281 | -11.941 | 0.00 | 0.00 | H |
| ATOM | 1169 | ZHD  | PRO | 74 | -3.111  | -13.422 | -14.009 | 0.00 | 0.00 | H |
| ATOM | 1170 | 3HD  | PRO | 74 | -3.219  | -13.068 | -12.259 | 0.00 | 0.00 | H |
| ATOM | 1171 | N    | SER | 75 | -2.040  | -10.697 | -16.127 | 0.00 | 0.00 | N |
| ATOM | 1172 | CA   | SER | 75 | -2.081  | -10.232 | -17.510 | 0.00 | 0.00 | C |
| ATOM | 1173 | C    | SER | 75 | -2.706  | -8.837  | -17.654 | 0.00 | 0.00 | C |
| ATOM | 1174 | O    | SER | 75 | -2.505  | -8.205  | -18.692 | 0.00 | 0.00 | O |
| ATOM | 1175 | CB   | SER | 75 | -2.848  | -11.253 | -18.359 | 0.00 | 0.00 | C |
| ATOM | 1176 | OG   | SER | 75 | -2.203  | -12.510 | -18.345 | 0.00 | 0.00 | O |
| ATOM | 1177 | H    | SER | 75 | -2.875  | -11.143 | -15.776 | 0.00 | 0.00 | H |
| ATOM | 1178 | HA   | SER | 75 | -1.063  | -10.180 | -17.897 | 0.00 | 0.00 | H |
| ATOM | 1179 | ZHB  | SER | 75 | -3.862  | -11.363 | -17.971 | 0.00 | 0.00 | H |
| ATOM | 1180 | 3HB  | SER | 75 | -2.901  | -10.899 | -19.389 | 0.00 | 0.00 | H |
| ATOM | 1181 | HG   | SER | 75 | -2.706  | -13.117 | -18.893 | 0.00 | 0.00 | H |
| ATOM | 1182 | N    | SER | 76 | -3.436  | -8.344  | -16.637 | 0.00 | 0.00 | N |
| ATOM | 1183 | CA   | SER | 76 | -4.013  | -7.003  | -16.642 | 0.00 | 0.00 | C |
| ATOM | 1184 | C    | SER | 76 | -2.939  | -5.949  | -16.364 | 0.00 | 0.00 | C |
| ATOM | 1185 | O    | SER | 76 | -1.949  | -6.228  | -15.686 | 0.00 | 0.00 | O |
| ATOM | 1186 | CB   | SER | 76 | -5.177  | -6.902  | -15.645 | 0.00 | 0.00 | C |
| ATOM | 1187 | OG   | SER | 76 | -4.724  | -6.913  | -14.308 | 0.00 | 0.00 | O |
| ATOM | 1188 | H    | SER | 76 | -3.565  | -8.903  | -15.805 | 0.00 | 0.00 | H |
| ATOM | 1189 | HA   | SER | 76 | -4.427  | -6.818  | -17.635 | 0.00 | 0.00 | H |
| ATOM | 1190 | ZHB  | SER | 76 | -5.712  | -5.968  | -15.821 | 0.00 | 0.00 | H |
| ATOM | 1191 | 3HB  | SER | 76 | -5.865  | -7.732  | -15.803 | 0.00 | 0.00 | H |
| ATOM | 1192 | HG   | SER | 76 | -5.488  | -6.862  | -13.728 | 0.00 | 0.00 | H |
| ATOM | 1193 | N    | THR | 77 | -3.161  | -4.727  | -16.864 | 0.00 | 0.00 | N |
| ATOM | 1194 | CA   | THR | 77 | -2.244  | -3.603  | -16.684 | 0.00 | 0.00 | C |
| ATOM | 1195 | C    | THR | 77 | -2.201  | -3.108  | -15.230 | 0.00 | 0.00 | C |
| ATOM | 1196 | O    | THR | 77 | -1.228  | -2.461  | -14.857 | 0.00 | 0.00 | O |
| ATOM | 1197 | CB   | THR | 77 | -2.612  | -2.445  | -17.633 | 0.00 | 0.00 | C |
| ATOM | 1198 | CG2  | THR | 77 | -2.481  | -2.841  | -19.109 | 0.00 | 0.00 | C |
| ATOM | 1199 | OG1  | THR | 77 | -3.924  | -1.978  | -17.380 | 0.00 | 0.00 | O |
| ATOM | 1200 | H    | THR | 77 | -4.000  | -4.558  | -17.401 | 0.00 | 0.00 | H |
| ATOM | 1201 | HA   | THR | 77 | -1.241  | -3.943  | -16.946 | 0.00 | 0.00 | H |
| ATOM | 1202 | HB   | THR | 77 | -1.918  | -1.624  | -17.448 | 0.00 | 0.00 | H |
| ATOM | 1203 | 1HG  | THR | 77 | -4.085  | -1.211  | -17.934 | 0.00 | 0.00 | H |
| ATOM | 1204 | 1HG2 | THR | 77 | -3.199  | -3.621  | -19.362 | 0.00 | 0.00 | H |
| ATOM | 1205 | 2HG2 | THR | 77 | -1.471  | -3.205  | -19.303 | 0.00 | 0.00 | H |
| ATOM | 1206 | 3HG2 | THR | 77 | -2.666  | -1.969  | -19.737 | 0.00 | 0.00 | H |
| ATOM | 1207 | N    | MET | 78 | -3.221  | -3.421  | -14.415 | 0.00 | 0.00 | N |
| ATOM | 1208 | CA   | MET | 78 | -3.311  | -3.012  | -13.016 | 0.00 | 0.00 | C |
| ATOM | 1209 | C    | MET | 78 | -2.659  | -4.042  | -12.082 | 0.00 | 0.00 | C |
| ATOM | 1210 | O    | MET | 78 | -2.193  | -3.666  | -11.009 | 0.00 | 0.00 | O |
| ATOM | 1211 | CB   | MET | 78 | -4.786  | -2.771  | -12.653 | 0.00 | 0.00 | C |
| ATOM | 1212 | CG   | MET | 78 | -5.438  | -1.674  | -13.505 | 0.00 | 0.00 | C |
| ATOM | 1213 | SD   | MET | 78 | -4.675  | -0.034  | -13.367 | 0.00 | 0.00 | S |
| ATOM | 1214 | CE   | MET | 78 | -5.518  | 0.804   | -14.735 | 0.00 | 0.00 | C |
| ATOM | 1215 | H    | MET | 78 | -3.988  | -3.967  | -14.782 | 0.00 | 0.00 | H |
| ATOM | 1216 | HA   | MET | 78 | -2.776  | -2.071  | -12.891 | 0.00 | 0.00 | H |
| ATOM | 1217 | ZHB  | MET | 78 | -5.345  | -3.697  | -12.789 | 0.00 | 0.00 | H |
| ATOM | 1218 | 3HB  | MET | 78 | -4.852  | -2.480  | -11.605 | 0.00 | 0.00 | H |
| ATOM | 1219 | ZHG  | MET | 78 | -5.416  | -1.979  | -14.550 | 0.00 | 0.00 | H |
| ATOM | 1220 | 3HG  | MET | 78 | -6.483  | -1.588  | -13.209 | 0.00 | 0.00 | H |
| ATOM | 1221 | 1HE  | MET | 78 | -6.597  | 0.714   | -14.617 | 0.00 | 0.00 | H |
| ATOM | 1222 | ZHE  | MET | 78 | -5.240  | 1.858   | -14.742 | 0.00 | 0.00 | H |
| ATOM | 1223 | 3HE  | MET | 78 | -5.222  | 0.346   | -15.678 | 0.00 | 0.00 | H |
| ATOM | 1224 | N    | GLY | 79 | -2.586  | -5.318  | -12.491 | 0.00 | 0.00 | N |
| ATOM | 1225 | CA   | GLY | 79 | -1.852  | -6.349  | -11.765 | 0.00 | 0.00 | C |
| ATOM | 1226 | C    | GLY | 79 | -0.350  | -6.298  | -12.060 | 0.00 | 0.00 | C |
| ATOM | 1227 | O    | GLY | 79 | 0.452   | -6.717  | -11.227 | 0.00 | 0.00 | O |
| ATOM | 1228 | H    | GLY | 79 | -2.988  | -5.576  | -13.381 | 0.00 | 0.00 | H |
| ATOM | 1229 | ZHA  | GLY | 79 | -2.019  | -6.223  | -10.697 | 0.00 | 0.00 | H |
| ATOM | 1230 | ZHA  | GLY | 79 | -2.237  | -7.322  | -12.065 | 0.00 | 0.00 | H |

|      |      |      |     |    |        |         |         |      |      |   |
|------|------|------|-----|----|--------|---------|---------|------|------|---|
| ATOM | 1231 | N    | GLN | 80 | 0.022  | -5.736  | -13.219 | 0.00 | 0.00 | N |
| ATOM | 1232 | CA   | GLN | 80 | 1.398  | -5.489  | -13.629 | 0.00 | 0.00 | C |
| ATOM | 1233 | C    | GLN | 80 | 1.942  | -4.204  | -12.991 | 0.00 | 0.00 | C |
| ATOM | 1234 | O    | GLN | 80 | 3.148  | -4.117  | -12.775 | 0.00 | 0.00 | O |
| ATOM | 1235 | CB   | GLN | 80 | 1.445  | -5.398  | -15.162 | 0.00 | 0.00 | C |
| ATOM | 1236 | CG   | GLN | 80 | 1.243  | -6.773  | -15.826 | 0.00 | 0.00 | C |
| ATOM | 1237 | CD   | GLN | 80 | 0.975  | -6.699  | -17.334 | 0.00 | 0.00 | C |
| ATOM | 1238 | NE2  | GLN | 80 | 0.762  | -7.862  | -17.954 | 0.00 | 0.00 | N |
| ATOM | 1239 | OE1  | GLN | 80 | 0.952  | -5.626  | -17.935 | 0.00 | 0.00 | O |
| ATOM | 1240 | H    | GLN | 80 | -0.698 | -5.416  | -13.850 | 0.00 | 0.00 | H |
| ATOM | 1241 | HA   | GLN | 80 | 2.025  | -6.323  | -13.309 | 0.00 | 0.00 | H |
| ATOM | 1242 | ZHB  | GLN | 80 | 0.669  | -4.706  | -15.495 | 0.00 | 0.00 | H |
| ATOM | 1243 | ZHB  | GLN | 80 | 2.413  | -5.005  | -15.473 | 0.00 | 0.00 | H |
| ATOM | 1244 | ZHG  | GLN | 80 | 2.134  | -7.380  | -15.655 | 0.00 | 0.00 | H |
| ATOM | 1245 | ZHG  | GLN | 80 | 0.406  | -7.290  | -15.360 | 0.00 | 0.00 | H |
| ATOM | 1246 | 1HE2 | GLN | 80 | 0.574  | -7.876  | -18.946 | 0.00 | 0.00 | H |
| ATOM | 1247 | 2HE2 | GLN | 80 | 0.781  | -8.725  | -17.429 | 0.00 | 0.00 | H |
| ATOM | 1248 | N    | VAL | 81 | 1.074  | -3.235  | -12.659 | 0.00 | 0.00 | N |
| ATOM | 1249 | CA   | VAL | 81 | 1.455  | -1.998  | -11.980 | 0.00 | 0.00 | C |
| ATOM | 1250 | C    | VAL | 81 | 1.634  | -2.238  | -10.478 | 0.00 | 0.00 | C |
| ATOM | 1251 | O    | VAL | 81 | 2.521  | -1.622  | -9.895  | 0.00 | 0.00 | O |
| ATOM | 1252 | CB   | VAL | 81 | 0.432  | -0.891  | -12.309 | 0.00 | 0.00 | C |
| ATOM | 1253 | CG1  | VAL | 81 | 0.425  | 0.285   | -11.319 | 0.00 | 0.00 | C |
| ATOM | 1254 | CG2  | VAL | 81 | 0.741  | -0.315  | -13.699 | 0.00 | 0.00 | C |
| ATOM | 1255 | H    | VAL | 81 | 0.093  | -3.365  | -12.861 | 0.00 | 0.00 | H |
| ATOM | 1256 | HA   | VAL | 81 | 2.422  | -1.678  | -12.370 | 0.00 | 0.00 | H |
| ATOM | 1257 | HB   | VAL | 81 | -0.570 | -1.325  | -12.316 | 0.00 | 0.00 | H |
| ATOM | 1258 | 1HG1 | VAL | 81 | 1.415  | 0.734   | -11.258 | 0.00 | 0.00 | H |
| ATOM | 1259 | 2HG1 | VAL | 81 | -0.282 | 1.035   | -11.664 | 0.00 | 0.00 | H |
| ATOM | 1260 | 3HG1 | VAL | 81 | 0.115  | -0.048  | -10.329 | 0.00 | 0.00 | H |
| ATOM | 1261 | 1HG2 | VAL | 81 | -0.083 | 0.324   | -14.006 | 0.00 | 0.00 | H |
| ATOM | 1262 | 2HG2 | VAL | 81 | 1.660  | 0.271   | -13.670 | 0.00 | 0.00 | H |
| ATOM | 1263 | 3HG2 | VAL | 81 | 0.867  | -1.111  | -14.432 | 0.00 | 0.00 | H |
| ATOM | 1264 | N    | GLY | 82 | 0.866  | -3.149  | -9.861  | 0.00 | 0.00 | N |
| ATOM | 1265 | CA   | GLY | 82 | 1.088  | -3.558  | -8.477  | 0.00 | 0.00 | C |
| ATOM | 1266 | C    | GLY | 82 | 2.374  | -4.376  | -8.295  | 0.00 | 0.00 | C |
| ATOM | 1267 | O    | GLY | 82 | 2.873  | -4.464  | -7.174  | 0.00 | 0.00 | O |
| ATOM | 1268 | H    | GLY | 82 | 0.149  | -3.633  | -10.384 | 0.00 | 0.00 | H |
| ATOM | 1269 | ZHA  | GLY | 82 | 1.142  | -2.671  | -7.846  | 0.00 | 0.00 | H |
| ATOM | 1270 | ZHA  | GLY | 82 | 0.238  | -4.154  | -8.155  | 0.00 | 0.00 | H |
| ATOM | 1271 | N    | ARG | 83 | 2.929  | -4.918  | -9.392  | 0.00 | 0.00 | N |
| ATOM | 1272 | CA   | ARG | 83 | 4.219  | -5.601  | -9.435  | 0.00 | 0.00 | C |
| ATOM | 1273 | C    | ARG | 83 | 5.372  | -4.610  | -9.670  | 0.00 | 0.00 | C |
| ATOM | 1274 | O    | ARG | 83 | 6.483  | -4.848  | -9.195  | 0.00 | 0.00 | O |
| ATOM | 1275 | CB   | ARG | 83 | 4.152  | -6.669  | -10.537 | 0.00 | 0.00 | C |
| ATOM | 1276 | CG   | ARG | 83 | 5.309  | -7.672  | -10.457 | 0.00 | 0.00 | C |
| ATOM | 1277 | CD   | ARG | 83 | 5.074  | -8.824  | -11.438 | 0.00 | 0.00 | C |
| ATOM | 1278 | NE   | ARG | 83 | 6.052  | -9.902  | -11.237 | 0.00 | 0.00 | N |
| ATOM | 1279 | CZ   | ARG | 83 | 5.949  | -11.145 | -11.741 | 0.00 | 0.00 | C |
| ATOM | 1280 | NH1  | ARG | 83 | 6.896  | -12.046 | -11.454 | 0.00 | 0.00 | N |
| ATOM | 1281 | NH2  | ARG | 83 | 4.919  | -11.504 | -12.523 | 0.00 | 0.00 | N |
| ATOM | 1282 | H    | ARG | 83 | 2.457  | -4.800  | -10.277 | 0.00 | 0.00 | H |
| ATOM | 1283 | HA   | ARG | 83 | 4.375  | -6.103  | -8.479  | 0.00 | 0.00 | H |
| ATOM | 1284 | ZHB  | ARG | 83 | 3.213  | -7.215  | -10.436 | 0.00 | 0.00 | H |
| ATOM | 1285 | ZHB  | ARG | 83 | 4.160  | -6.192  | -11.517 | 0.00 | 0.00 | H |
| ATOM | 1286 | ZHG  | ARG | 83 | 6.250  | -7.177  | -10.698 | 0.00 | 0.00 | H |
| ATOM | 1287 | ZHG  | ARG | 83 | 5.369  | -8.070  | -9.445  | 0.00 | 0.00 | H |
| ATOM | 1288 | ZHD  | ARG | 83 | 4.072  | -9.224  | -11.283 | 0.00 | 0.00 | H |
| ATOM | 1289 | ZHD  | ARG | 83 | 5.150  | -8.450  | -12.460 | 0.00 | 0.00 | H |
| ATOM | 1290 | HE   | ARG | 83 | 6.851  | -9.686  | -10.660 | 0.00 | 0.00 | H |
| ATOM | 1291 | 1HH1 | ARG | 83 | 7.676  | -11.788 | -10.868 | 0.00 | 0.00 | H |
| ATOM | 1292 | 2HH1 | ARG | 83 | 6.831  | -12.982 | -11.827 | 0.00 | 0.00 | H |
| ATOM | 1293 | 1HH2 | ARG | 83 | 4.197  | -10.834 | -12.745 | 0.00 | 0.00 | H |
| ATOM | 1294 | 2HH2 | ARG | 83 | 4.866  | -12.443 | -12.890 | 0.00 | 0.00 | H |
| ATOM | 1295 | N    | GLN | 84 | 5.102  | -3.492  | -10.364 | 0.00 | 0.00 | N |
| ATOM | 1296 | CA   | GLN | 84 | 6.039  | -2.386  | -10.558 | 0.00 | 0.00 | C |
| ATOM | 1297 | C    | GLN | 84 | 6.077  | -1.446  | -9.343  | 0.00 | 0.00 | C |
| ATOM | 1298 | O    | GLN | 84 | 7.032  | -0.681  | -9.213  | 0.00 | 0.00 | O |
| ATOM | 1299 | CB   | GLN | 84 | 5.660  | -1.598  | -11.820 | 0.00 | 0.00 | C |
| ATOM | 1300 | CG   | GLN | 84 | 5.953  | -2.356  | -13.121 | 0.00 | 0.00 | C |
| ATOM | 1301 | CD   | GLN | 84 | 5.337  | -1.636  | -14.320 | 0.00 | 0.00 | C |
| ATOM | 1302 | NE2  | GLN | 84 | 6.052  | -0.652  | -14.872 | 0.00 | 0.00 | N |
| ATOM | 1303 | OE1  | GLN | 84 | 4.222  | -1.949  | -14.732 | 0.00 | 0.00 | O |
| ATOM | 1304 | H    | GLN | 84 | 4.169  | -3.364  | -10.730 | 0.00 | 0.00 | H |
| ATOM | 1305 | HA   | GLN | 84 | 7.040  | -2.794  | -10.702 | 0.00 | 0.00 | H |
| ATOM | 1306 | ZHB  | GLN | 84 | 4.604  | -1.336  | -11.775 | 0.00 | 0.00 | H |
| ATOM | 1307 | ZHB  | GLN | 84 | 6.240  | -0.675  | -11.839 | 0.00 | 0.00 | H |
| ATOM | 1308 | ZHG  | GLN | 84 | 7.033  | -2.433  | -13.252 | 0.00 | 0.00 | H |
| ATOM | 1309 | ZHG  | GLN | 84 | 5.553  | -3.368  | -13.068 | 0.00 | 0.00 | H |
| ATOM | 1310 | 1HE2 | GLN | 84 | 5.683  | -0.143  | -15.662 | 0.00 | 0.00 | H |
| ATOM | 1311 | 2HE2 | GLN | 84 | 6.961  | -0.419  | -14.500 | 0.00 | 0.00 | H |
| ATOM | 1312 | N    | LEU | 85 | 5.072  | -1.516  | -8.454  | 0.00 | 0.00 | N |
| ATOM | 1313 | CA   | LEU | 85 | 5.083  | -0.865  | -7.151  | 0.00 | 0.00 | C |
| ATOM | 1314 | C    | LEU | 85 | 5.783  | -1.752  | -6.115  | 0.00 | 0.00 | C |
| ATOM | 1315 | O    | LEU | 85 | 6.299  | -1.211  | -5.141  | 0.00 | 0.00 | O |
| ATOM | 1316 | CB   | LEU | 85 | 3.653  | -0.499  | -6.700  | 0.00 | 0.00 | C |
| ATOM | 1317 | CG   | LEU | 85 | 3.258  | 0.957   | -7.031  | 0.00 | 0.00 | C |
| ATOM | 1318 | CD1  | LEU | 85 | 3.107  | 1.232   | -8.532  | 0.00 | 0.00 | C |
| ATOM | 1319 | CD2  | LEU | 85 | 1.937  | 1.308   | -6.334  | 0.00 | 0.00 | C |
| ATOM | 1320 | H    | LEU | 85 | 4.305  | -2.147  | -8.638  | 0.00 | 0.00 | H |
| ATOM | 1321 | HA   | LEU | 85 | 5.650  | 0.062   | -7.227  | 0.00 | 0.00 | H |
| ATOM | 1322 | ZHB  | LEU | 85 | 2.931  | -1.195  | -7.129  | 0.00 | 0.00 | H |
| ATOM | 1323 | ZHB  | LEU | 85 | 3.603  | -0.608  | -5.615  | 0.00 | 0.00 | H |
| ATOM | 1324 | ZHG  | LEU | 85 | 4.029  | 1.624   | -6.639  | 0.00 | 0.00 | H |
| ATOM | 1325 | 1HD1 | LEU | 85 | 2.914  | 2.292   | -8.688  | 0.00 | 0.00 | H |
| ATOM | 1326 | 2HD1 | LEU | 85 | 4.016  | 0.961   | -9.067  | 0.00 | 0.00 | H |
| ATOM | 1327 | 3HD1 | LEU | 85 | 2.261  | 0.671   | -8.926  | 0.00 | 0.00 | H |
| ATOM | 1328 | 1HD2 | LEU | 85 | 1.621  | 2.313   | -6.616  | 0.00 | 0.00 | H |
| ATOM | 1329 | 2HD2 | LEU | 85 | 2.077  | 1.276   | -5.255  | 0.00 | 0.00 | H |
| ATOM | 1330 | 3HD2 | LEU | 85 | 1.161  | 0.599   | -6.622  | 0.00 | 0.00 | H |
| ATOM | 1331 | N    | ALA | 86 | 5.827  | -3.082  | -6.325  | 0.00 | 0.00 | N |
| ATOM | 1332 | CA   | ALA | 86 | 6.449  | -4.038  | -5.412  | 0.00 | 0.00 | C |
| ATOM | 1333 | C    | ALA | 86 | 7.979  | -4.039  | -5.508  | 0.00 | 0.00 | C |
| ATOM | 1334 | O    | ALA | 86 | 8.635  | -4.321  | -4.506  | 0.00 | 0.00 | O |
| ATOM | 1335 | CB   | ALA | 86 | 5.891  | -5.439  | -5.685  | 0.00 | 0.00 | C |

|      |      |      |     |    |        |        |         |      |      |   |
|------|------|------|-----|----|--------|--------|---------|------|------|---|
| ATOM | 1336 | H    | ALA | 86 | 5.394  | -3.458 | -7.156  | 0.00 | 0.00 | H |
| ATOM | 1337 | HA   | ALA | 86 | 6.178  | -3.771 | -4.392  | 0.00 | 0.00 | H |
| ATOM | 1338 | 1HB  | ALA | 86 | 4.814  | -5.451 | -5.513  | 0.00 | 0.00 | H |
| ATOM | 1339 | 2HB  | ALA | 86 | 6.100  | -5.737 | -6.712  | 0.00 | 0.00 | H |
| ATOM | 1340 | 3HB  | ALA | 86 | 6.361  | -6.155 | -5.013  | 0.00 | 0.00 | H |
| ATOM | 1341 | N    | ILE | 87 | 8.542  | -3.710 | -6.683  | 0.00 | 0.00 | N |
| ATOM | 1342 | CA   | ILE | 87 | 9.985  | -3.703 | -6.922  | 0.00 | 0.00 | C |
| ATOM | 1343 | C    | ILE | 87 | 10.636 | -2.390 | -6.452  | 0.00 | 0.00 | C |
| ATOM | 1344 | O    | ILE | 87 | 11.780 | -2.421 | -5.996  | 0.00 | 0.00 | O |
| ATOM | 1345 | CB   | ILE | 87 | 10.267 | -4.051 | -8.403  | 0.00 | 0.00 | C |
| ATOM | 1346 | CG1  | ILE | 87 | 11.759 | -4.398 | -8.594  | 0.00 | 0.00 | C |
| ATOM | 1347 | CG2  | ILE | 87 | 9.807  | -2.939 | -9.363  | 0.00 | 0.00 | C |
| ATOM | 1348 | CD1  | ILE | 87 | 12.081 | -4.997 | -9.969  | 0.00 | 0.00 | C |
| ATOM | 1349 | H    | ILE | 87 | 7.946  | -3.477 | -7.463  | 0.00 | 0.00 | H |
| ATOM | 1350 | HA   | ILE | 87 | 10.414 | -4.506 | -6.321  | 0.00 | 0.00 | H |
| ATOM | 1351 | HB   | ILE | 87 | 9.691  | -4.950 | -8.637  | 0.00 | 0.00 | H |
| ATOM | 1352 | 2HG1 | ILE | 87 | 12.367 | -3.502 | -8.453  | 0.00 | 0.00 | H |
| ATOM | 1353 | 3HG1 | ILE | 87 | 12.049 | -5.128 | -7.837  | 0.00 | 0.00 | H |
| ATOM | 1354 | 1HG2 | ILE | 87 | 8.776  | -2.668 | -9.146  | 0.00 | 0.00 | H |
| ATOM | 1355 | 2HG2 | ILE | 87 | 10.438 | -2.057 | -9.256  | 0.00 | 0.00 | H |
| ATOM | 1356 | 3HG2 | ILE | 87 | 9.852  | -3.288 | -10.394 | 0.00 | 0.00 | H |
| ATOM | 1357 | 1HD1 | ILE | 87 | 11.451 | -5.868 | -10.151 | 0.00 | 0.00 | H |
| ATOM | 1358 | 2HD1 | ILE | 87 | 11.920 | -4.257 | -10.753 | 0.00 | 0.00 | H |
| ATOM | 1359 | 3HD1 | ILE | 87 | 13.126 | -5.304 | -9.990  | 0.00 | 0.00 | H |
| ATOM | 1360 | N    | ILE | 88 | 9.897  | -1.267 | -6.486  | 0.00 | 0.00 | N |
| ATOM | 1361 | CA   | ILE | 88 | 10.263 | -0.039 | -5.774  | 0.00 | 0.00 | C |
| ATOM | 1362 | C    | ILE | 88 | 9.828  | -0.108 | -4.299  | 0.00 | 0.00 | C |
| ATOM | 1363 | O    | ILE | 88 | 10.271 | 0.715  | -3.501  | 0.00 | 0.00 | O |
| ATOM | 1364 | CB   | ILE | 88 | 9.721  | 1.223  | -6.488  | 0.00 | 0.00 | C |
| ATOM | 1365 | CG1  | ILE | 88 | 8.177  | 1.280  | -6.469  | 0.00 | 0.00 | C |
| ATOM | 1366 | CG2  | ILE | 88 | 10.297 | 1.314  | -7.914  | 0.00 | 0.00 | C |
| ATOM | 1367 | CD1  | ILE | 88 | 7.576  | 2.534  | -7.116  | 0.00 | 0.00 | C |
| ATOM | 1368 | H    | ILE | 88 | 8.970  | -1.304 | -6.885  | 0.00 | 0.00 | H |
| ATOM | 1369 | HA   | ILE | 88 | 11.350 | 0.038  | -5.780  | 0.00 | 0.00 | H |
| ATOM | 1370 | HB   | ILE | 88 | 10.090 | 2.090  | -5.938  | 0.00 | 0.00 | H |
| ATOM | 1371 | 2HG1 | ILE | 88 | 7.788  | 0.404  | -6.979  | 0.00 | 0.00 | H |
| ATOM | 1372 | 3HG1 | ILE | 88 | 7.832  | 1.252  | -5.435  | 0.00 | 0.00 | H |
| ATOM | 1373 | 1HG2 | ILE | 88 | 11.380 | 1.181  | -7.883  | 0.00 | 0.00 | H |
| ATOM | 1374 | 2HG2 | ILE | 88 | 10.090 | 2.293  | -8.342  | 0.00 | 0.00 | H |
| ATOM | 1375 | 3HG2 | ILE | 88 | 9.861  | 0.546  | -8.553  | 0.00 | 0.00 | H |
| ATOM | 1376 | 1HD1 | ILE | 88 | 8.002  | 3.429  | -6.662  | 0.00 | 0.00 | H |
| ATOM | 1377 | 2HD1 | ILE | 88 | 7.768  | 2.538  | -8.189  | 0.00 | 0.00 | H |
| ATOM | 1378 | 3HD1 | ILE | 88 | 6.496  | 2.537  | -6.959  | 0.00 | 0.00 | H |
| ATOM | 1379 | N    | GLY | 89 | 8.995  | -1.101 | -3.940  | 0.00 | 0.00 | N |
| ATOM | 1380 | CA   | GLY | 89 | 8.666  | -1.474 | -2.573  | 0.00 | 0.00 | C |
| ATOM | 1381 | C    | GLY | 89 | 9.821  | -2.216 | -1.894  | 0.00 | 0.00 | C |
| ATOM | 1382 | O    | GLY | 89 | 9.918  | -2.179 | -0.668  | 0.00 | 0.00 | O |
| ATOM | 1383 | H    | GLY | 89 | 8.654  | -1.720 | -4.662  | 0.00 | 0.00 | H |
| ATOM | 1384 | 2HA  | GLY | 89 | 8.396  | -0.585 | -2.002  | 0.00 | 0.00 | H |
| ATOM | 1385 | 3HA  | GLY | 89 | 7.804  | -2.139 | -2.605  | 0.00 | 0.00 | H |
| ATOM | 1386 | N    | ASP | 90 | 10.707 | -2.842 | -2.687  | 0.00 | 0.00 | N |
| ATOM | 1387 | CA   | ASP | 90 | 11.937 | -3.470 | -2.223  | 0.00 | 0.00 | C |
| ATOM | 1388 | C    | ASP | 90 | 13.073 | -2.446 | -2.095  | 0.00 | 0.00 | C |
| ATOM | 1389 | O    | ASP | 90 | 13.943 | -2.618 | -1.243  | 0.00 | 0.00 | O |
| ATOM | 1390 | CB   | ASP | 90 | 12.310 | -4.623 | -3.165  | 0.00 | 0.00 | C |
| ATOM | 1391 | CG   | ASP | 90 | 13.363 | -5.532 | -2.533  | 0.00 | 0.00 | C |
| ATOM | 1392 | OD1  | ASP | 90 | 12.957 | -6.390 | -1.717  | 0.00 | 0.00 | O |
| ATOM | 1393 | OD2  | ASP | 90 | 14.555 | -5.349 | -2.863  | 0.00 | 0.00 | O |
| ATOM | 1394 | H    | ASP | 90 | 10.555 | -2.831 | -3.685  | 0.00 | 0.00 | H |
| ATOM | 1395 | HA   | ASP | 90 | 11.752 | -3.897 | -1.241  | 0.00 | 0.00 | H |
| ATOM | 1396 | 2HB  | ASP | 90 | 11.423 | -5.217 | -3.383  | 0.00 | 0.00 | H |
| ATOM | 1397 | 3HB  | ASP | 90 | 12.685 | -4.219 | -4.107  | 0.00 | 0.00 | H |
| ATOM | 1398 | N    | ASP | 91 | 13.032 | -1.365 | -2.891  | 0.00 | 0.00 | N |
| ATOM | 1399 | CA   | ASP | 91 | 13.956 | -0.235 | -2.807  | 0.00 | 0.00 | C |
| ATOM | 1400 | C    | ASP | 91 | 13.731 | 0.604  | -1.533  | 0.00 | 0.00 | C |
| ATOM | 1401 | O    | ASP | 91 | 14.593 | 1.409  | -1.183  | 0.00 | 0.00 | O |
| ATOM | 1402 | CB   | ASP | 91 | 13.800 | 0.608  | -4.085  | 0.00 | 0.00 | C |
| ATOM | 1403 | CG   | ASP | 91 | 14.818 | 1.744  | -4.196  | 0.00 | 0.00 | C |
| ATOM | 1404 | OD1  | ASP | 91 | 16.030 | 1.433  | -4.179  | 0.00 | 0.00 | O |
| ATOM | 1405 | OD2  | ASP | 91 | 14.369 | 2.905  | -4.303  | 0.00 | 0.00 | O |
| ATOM | 1406 | H    | ASP | 91 | 12.284 | -1.288 | -3.565  | 0.00 | 0.00 | H |
| ATOM | 1407 | HA   | ASP | 91 | 14.972 | -0.633 | -2.780  | 0.00 | 0.00 | H |
| ATOM | 1408 | 2HB  | ASP | 91 | 13.917 | -0.041 | -4.955  | 0.00 | 0.00 | H |
| ATOM | 1409 | 3HB  | ASP | 91 | 12.796 | 1.029  | -4.112  | 0.00 | 0.00 | H |
| ATOM | 1410 | N    | ILE | 92 | 12.605 | 0.393  | -0.831  | 0.00 | 0.00 | N |
| ATOM | 1411 | CA   | ILE | 92 | 12.252 | 1.052  | 0.427   | 0.00 | 0.00 | C |
| ATOM | 1412 | C    | ILE | 92 | 12.030 | 0.047  | 1.568   | 0.00 | 0.00 | C |
| ATOM | 1413 | O    | ILE | 92 | 11.643 | 0.459  | 2.658   | 0.00 | 0.00 | O |
| ATOM | 1414 | CB   | ILE | 92 | 11.057 | 2.017  | 0.239   | 0.00 | 0.00 | C |
| ATOM | 1415 | CG1  | ILE | 92 | 9.757  | 1.255  | -0.102  | 0.00 | 0.00 | C |
| ATOM | 1416 | CG2  | ILE | 92 | 11.427 | 3.088  | -0.802  | 0.00 | 0.00 | C |
| ATOM | 1417 | CD1  | ILE | 92 | 8.515  | 2.134  | -0.284  | 0.00 | 0.00 | C |
| ATOM | 1418 | H    | ILE | 92 | 11.944 | -0.288 | -1.180  | 0.00 | 0.00 | H |
| ATOM | 1419 | HA   | ILE | 92 | 13.103 | 1.656  | 0.735   | 0.00 | 0.00 | H |
| ATOM | 1420 | HB   | ILE | 92 | 10.897 | 2.536  | 1.184   | 0.00 | 0.00 | H |
| ATOM | 1421 | 2HG1 | ILE | 92 | 9.911  | 0.687  | -1.015  | 0.00 | 0.00 | H |
| ATOM | 1422 | 3HG1 | ILE | 92 | 9.540  | 0.544  | 0.695   | 0.00 | 0.00 | H |
| ATOM | 1423 | 1HG2 | ILE | 92 | 12.398 | 3.517  | -0.551  | 0.00 | 0.00 | H |
| ATOM | 1424 | 2HG2 | ILE | 92 | 11.471 | 2.659  | -1.803  | 0.00 | 0.00 | H |
| ATOM | 1425 | 3HG2 | ILE | 92 | 10.693 | 3.887  | -0.791  | 0.00 | 0.00 | H |
| ATOM | 1426 | 1HD1 | ILE | 92 | 8.326  | 2.700  | 0.627   | 0.00 | 0.00 | H |
| ATOM | 1427 | 2HD1 | ILE | 92 | 8.647  | 2.817  | -1.124  | 0.00 | 0.00 | H |
| ATOM | 1428 | 3HD1 | ILE | 92 | 7.653  | 1.499  | -0.486  | 0.00 | 0.00 | H |
| ATOM | 1429 | N    | ASN | 93 | 12.301 | -1.252 | 1.351   | 0.00 | 0.00 | N |
| ATOM | 1430 | CA   | ASN | 93 | 12.257 | -2.281 | 2.390   | 0.00 | 0.00 | C |
| ATOM | 1431 | C    | ASN | 93 | 13.401 | -2.126 | 3.414   | 0.00 | 0.00 | C |
| ATOM | 1432 | O    | ASN | 93 | 13.423 | -2.835 | 4.421   | 0.00 | 0.00 | O |
| ATOM | 1433 | CB   | ASN | 93 | 12.296 | -3.658 | 1.711   | 0.00 | 0.00 | C |
| ATOM | 1434 | CG   | ASN | 93 | 11.917 | -4.831 | 2.622   | 0.00 | 0.00 | C |
| ATOM | 1435 | ND2  | ASN | 93 | 12.403 | -6.028 | 2.285   | 0.00 | 0.00 | N |
| ATOM | 1436 | OD1  | ASN | 93 | 11.183 | -4.675 | 3.596   | 0.00 | 0.00 | O |
| ATOM | 1437 | H    | ASN | 93 | 12.613 | -1.540 | 0.434   | 0.00 | 0.00 | H |
| ATOM | 1438 | HA   | ASN | 93 | 11.305 | -2.183 | 2.910   | 0.00 | 0.00 | H |
| ATOM | 1439 | 2HB  | ASN | 93 | 11.588 | -3.649 | 0.888   | 0.00 | 0.00 | H |
| ATOM | 1440 | 3HB  | ASN | 93 | 13.292 | -3.823 | 1.295   | 0.00 | 0.00 | H |

|      |      |      |     |    |        |        |        |      |      |   |
|------|------|------|-----|----|--------|--------|--------|------|------|---|
| ATOM | 1441 | 1HD2 | ASN | 93 | 12.175 | -6.839 | 2.842  | 0.00 | 0.00 | H |
| ATOM | 1442 | 2HD2 | ASN | 93 | 12.995 | -6.123 | 1.473  | 0.00 | 0.00 | H |
| ATOM | 1443 | N    | ARG | 94 | 14.340 | -1.202 | 3.159  | 0.00 | 0.00 | N |
| ATOM | 1444 | CA   | ARG | 94 | 15.528 | -0.950 | 3.958  | 0.00 | 0.00 | C |
| ATOM | 1445 | C    | ARG | 94 | 15.544 | 0.527  | 4.359  | 0.00 | 0.00 | C |
| ATOM | 1446 | O    | ARG | 94 | 15.458 | 1.406  | 3.500  | 0.00 | 0.00 | O |
| ATOM | 1447 | CB   | ARG | 94 | 16.779 | -1.321 | 3.144  | 0.00 | 0.00 | C |
| ATOM | 1448 | CG   | ARG | 94 | 16.858 | -2.829 | 2.838  | 0.00 | 0.00 | C |
| ATOM | 1449 | CD   | ARG | 94 | 18.040 | -3.174 | 1.920  | 0.00 | 0.00 | C |
| ATOM | 1450 | NE   | ARG | 94 | 17.874 | -2.622 | 0.563  | 0.00 | 0.00 | N |
| ATOM | 1451 | CZ   | ARG | 94 | 17.139 | -3.161 | -0.427 | 0.00 | 0.00 | C |
| ATOM | 1452 | NH1  | ARG | 94 | 16.463 | -4.309 | -0.265 | 0.00 | 0.00 | N |
| ATOM | 1453 | NH2  | ARG | 94 | 17.079 | -2.534 | -1.609 | 0.00 | 0.00 | N |
| ATOM | 1454 | H    | ARG | 94 | 14.246 | -0.649 | 2.319  | 0.00 | 0.00 | H |
| ATOM | 1455 | HA   | ARG | 94 | 15.509 | -1.562 | 4.862  | 0.00 | 0.00 | H |
| ATOM | 1456 | ZHB  | ARG | 94 | 16.770 | -0.757 | 2.210  | 0.00 | 0.00 | H |
| ATOM | 1457 | ZHB  | ARG | 94 | 17.667 | -1.034 | 3.709  | 0.00 | 0.00 | H |
| ATOM | 1458 | ZHG  | ARG | 94 | 16.975 | -3.371 | 3.776  | 0.00 | 0.00 | H |
| ATOM | 1459 | ZHG  | ARG | 94 | 15.938 | -3.167 | 2.361  | 0.00 | 0.00 | H |
| ATOM | 1460 | ZHD  | ARG | 94 | 18.958 | -2.777 | 2.354  | 0.00 | 0.00 | H |
| ATOM | 1461 | ZHD  | ARG | 94 | 18.136 | -4.258 | 1.859  | 0.00 | 0.00 | H |
| ATOM | 1462 | HE   | ARG | 94 | 18.357 | -1.757 | 0.372  | 0.00 | 0.00 | H |
| ATOM | 1463 | 1HH1 | ARG | 94 | 16.497 | -4.795 | 0.620  | 0.00 | 0.00 | H |
| ATOM | 1464 | 2HH1 | ARG | 94 | 15.916 | -4.684 | -1.027 | 0.00 | 0.00 | H |
| ATOM | 1465 | 1HH2 | ARG | 94 | 17.579 | -1.668 | -1.748 | 0.00 | 0.00 | H |
| ATOM | 1466 | 2HH2 | ARG | 94 | 16.525 | -2.924 | -2.358 | 0.00 | 0.00 | H |
| ATOM | 1467 | N    | ARG | 95 | 15.694 | 0.774  | 5.669  | 0.00 | 0.00 | N |
| ATOM | 1468 | CA   | ARG | 95 | 15.819 | 2.092  | 6.299  | 0.00 | 0.00 | C |
| ATOM | 1469 | C    | ARG | 95 | 14.637 | 3.054  | 6.051  | 0.00 | 0.00 | C |
| ATOM | 1470 | O    | ARG | 95 | 14.775 | 4.252  | 6.300  | 0.00 | 0.00 | O |
| ATOM | 1471 | CB   | ARG | 95 | 17.194 | 2.720  | 5.989  | 0.00 | 0.00 | C |
| ATOM | 1472 | CG   | ARG | 95 | 18.376 | 1.807  | 6.367  | 0.00 | 0.00 | C |
| ATOM | 1473 | CD   | ARG | 95 | 19.731 | 2.481  | 6.128  | 0.00 | 0.00 | C |
| ATOM | 1474 | NE   | ARG | 95 | 19.960 | 3.603  | 7.052  | 0.00 | 0.00 | N |
| ATOM | 1475 | CZ   | ARG | 95 | 21.082 | 4.341  | 7.116  | 0.00 | 0.00 | C |
| ATOM | 1476 | NH1  | ARG | 95 | 22.125 | 4.108  | 6.305  | 0.00 | 0.00 | N |
| ATOM | 1477 | NH2  | ARG | 95 | 21.161 | 5.332  | 8.013  | 0.00 | 0.00 | N |
| ATOM | 1478 | H    | ARG | 95 | 15.756 | -0.019 | 6.292  | 0.00 | 0.00 | H |
| ATOM | 1479 | HA   | ARG | 95 | 15.807 | 1.895  | 7.372  | 0.00 | 0.00 | H |
| ATOM | 1480 | ZHB  | ARG | 95 | 17.252 | 2.960  | 4.927  | 0.00 | 0.00 | H |
| ATOM | 1481 | ZHB  | ARG | 95 | 17.283 | 3.649  | 6.552  | 0.00 | 0.00 | H |
| ATOM | 1482 | ZHG  | ARG | 95 | 18.297 | 1.522  | 7.417  | 0.00 | 0.00 | H |
| ATOM | 1483 | ZHG  | ARG | 95 | 18.343 | 0.902  | 5.759  | 0.00 | 0.00 | H |
| ATOM | 1484 | ZHD  | ARG | 95 | 20.518 | 1.741  | 6.276  | 0.00 | 0.00 | H |
| ATOM | 1485 | ZHD  | ARG | 95 | 19.780 | 2.841  | 5.099  | 0.00 | 0.00 | H |
| ATOM | 1486 | HE   | ARG | 95 | 19.207 | 3.824  | 7.687  | 0.00 | 0.00 | H |
| ATOM | 1487 | 1HH1 | ARG | 95 | 22.078 | 3.362  | 5.626  | 0.00 | 0.00 | H |
| ATOM | 1488 | 2HH1 | ARG | 95 | 22.956 | 4.676  | 6.375  | 0.00 | 0.00 | H |
| ATOM | 1489 | 1HH2 | ARG | 95 | 20.384 | 5.517  | 8.631  | 0.00 | 0.00 | H |
| ATOM | 1490 | 2HH2 | ARG | 95 | 21.999 | 5.892  | 8.074  | 0.00 | 0.00 | H |
| ATOM | 1491 | N    | TYR | 96 | 13.483 | 2.545  | 5.585  | 0.00 | 0.00 | N |
| ATOM | 1492 | CA   | TYR | 96 | 12.250 | 3.311  | 5.391  | 0.00 | 0.00 | C |
| ATOM | 1493 | C    | TYR | 96 | 11.022 | 2.481  | 5.785  | 0.00 | 0.00 | C |
| ATOM | 1494 | O    | TYR | 96 | 10.076 | 3.034  | 6.344  | 0.00 | 0.00 | O |
| ATOM | 1495 | CB   | TYR | 96 | 12.122 | 3.753  | 3.927  | 0.00 | 0.00 | C |
| ATOM | 1496 | CG   | TYR | 96 | 13.220 | 4.667  | 3.417  | 0.00 | 0.00 | C |
| ATOM | 1497 | CD1  | TYR | 96 | 13.355 | 5.965  | 3.944  | 0.00 | 0.00 | C |
| ATOM | 1498 | CD2  | TYR | 96 | 14.102 | 4.224  | 2.411  | 0.00 | 0.00 | C |
| ATOM | 1499 | CE1  | TYR | 96 | 14.369 | 6.815  | 3.475  | 0.00 | 0.00 | C |
| ATOM | 1500 | CE2  | TYR | 96 | 15.116 | 5.069  | 1.933  | 0.00 | 0.00 | C |
| ATOM | 1501 | CZ   | TYR | 96 | 15.254 | 6.374  | 2.462  | 0.00 | 0.00 | C |
| ATOM | 1502 | OH   | TYR | 96 | 16.236 | 7.200  | 2.001  | 0.00 | 0.00 | O |
| ATOM | 1503 | H    | TYR | 96 | 13.436 | 1.556  | 5.390  | 0.00 | 0.00 | H |
| ATOM | 1504 | HA   | TYR | 96 | 12.271 | 4.199  | 6.024  | 0.00 | 0.00 | H |
| ATOM | 1505 | ZHB  | TYR | 96 | 12.081 | 2.868  | 3.295  | 0.00 | 0.00 | H |
| ATOM | 1506 | ZHB  | TYR | 96 | 11.171 | 4.271  | 3.817  | 0.00 | 0.00 | H |
| ATOM | 1507 | HD1  | TYR | 96 | 12.681 | 6.309  | 4.715  | 0.00 | 0.00 | H |
| ATOM | 1508 | HD2  | TYR | 96 | 14.005 | 3.230  | 2.004  | 0.00 | 0.00 | H |
| ATOM | 1509 | HE1  | TYR | 96 | 14.473 | 7.803  | 3.893  | 0.00 | 0.00 | H |
| ATOM | 1510 | HE2  | TYR | 96 | 15.790 | 4.719  | 1.166  | 0.00 | 0.00 | H |
| ATOM | 1511 | HH   | TYR | 96 | 16.776 | 6.794  | 1.318  | 0.00 | 0.00 | H |
| ATOM | 1512 | N    | ASP | 97 | 11.061 | 1.162  | 5.539  | 0.00 | 0.00 | N |
| ATOM | 1513 | CA   | ASP | 97 | 10.089 | 0.208  | 6.060  | 0.00 | 0.00 | C |
| ATOM | 1514 | C    | ASP | 97 | 10.419 | -0.173 | 7.511  | 0.00 | 0.00 | C |
| ATOM | 1515 | O    | ASP | 97 | 9.579  | -0.766 | 8.181  | 0.00 | 0.00 | O |
| ATOM | 1516 | CB   | ASP | 97 | 10.034 | -1.020 | 5.141  | 0.00 | 0.00 | C |
| ATOM | 1517 | CG   | ASP | 97 | 8.889  | -1.965 | 5.504  | 0.00 | 0.00 | C |
| ATOM | 1518 | OD1  | ASP | 97 | 9.176  | -2.995 | 6.151  | 0.00 | 0.00 | O |
| ATOM | 1519 | OD2  | ASP | 97 | 7.745  | -1.636 | 5.125  | 0.00 | 0.00 | O |
| ATOM | 1520 | H    | ASP | 97 | 11.861 | 0.780  | 5.055  | 0.00 | 0.00 | H |
| ATOM | 1521 | HA   | ASP | 97 | 9.108  | 0.683  | 6.044  | 0.00 | 0.00 | H |
| ATOM | 1522 | ZHB  | ASP | 97 | 9.875  | -0.688 | 4.115  | 0.00 | 0.00 | H |
| ATOM | 1523 | ZHB  | ASP | 97 | 10.983 | -1.553 | 5.193  | 0.00 | 0.00 | H |
| ATOM | 1524 | N    | SER | 98 | 11.605 | 0.203  | 8.018  | 0.00 | 0.00 | N |
| ATOM | 1525 | CA   | SER | 98 | 11.963 | 0.088  | 9.427  | 0.00 | 0.00 | C |
| ATOM | 1526 | C    | SER | 98 | 11.062 | 0.971  | 10.307 | 0.00 | 0.00 | C |
| ATOM | 1527 | O    | SER | 98 | 10.843 | 0.637  | 11.470 | 0.00 | 0.00 | O |
| ATOM | 1528 | CB   | SER | 98 | 13.431 | 0.493  | 9.607  | 0.00 | 0.00 | C |
| ATOM | 1529 | OG   | SER | 98 | 14.288 | -0.342 | 8.855  | 0.00 | 0.00 | O |
| ATOM | 1530 | H    | SER | 98 | 12.261 | 0.682  | 7.418  | 0.00 | 0.00 | H |
| ATOM | 1531 | HA   | SER | 98 | 11.845 | -0.951 | 9.738  | 0.00 | 0.00 | H |
| ATOM | 1532 | ZHB  | SER | 98 | 13.567 | 1.527  | 9.283  | 0.00 | 0.00 | H |
| ATOM | 1533 | ZHB  | SER | 98 | 13.699 | 0.415  | 10.661 | 0.00 | 0.00 | H |
| ATOM | 1534 | HG   | SER | 98 | 15.196 | -0.081 | 9.029  | 0.00 | 0.00 | H |
| ATOM | 1535 | N    | GLU | 99 | 10.515 | 2.062  | 9.742  | 0.00 | 0.00 | N |
| ATOM | 1536 | CA   | GLU | 99 | 9.552  | 2.941  | 10.392 | 0.00 | 0.00 | C |
| ATOM | 1537 | C    | GLU | 99 | 8.122  | 2.392  | 10.270 | 0.00 | 0.00 | C |
| ATOM | 1538 | O    | GLU | 99 | 7.319  | 2.611  | 11.174 | 0.00 | 0.00 | O |
| ATOM | 1539 | CB   | GLU | 99 | 9.682  | 4.345  | 9.774  | 0.00 | 0.00 | C |
| ATOM | 1540 | CG   | GLU | 99 | 8.852  | 5.423  | 10.487 | 0.00 | 0.00 | C |
| ATOM | 1541 | CD   | GLU | 99 | 9.292  | 5.643  | 11.936 | 0.00 | 0.00 | C |
| ATOM | 1542 | OE1  | GLU | 99 | 8.720  | 4.969  | 12.820 | 0.00 | 0.00 | O |
| ATOM | 1543 | OE2  | GLU | 99 | 10.191 | 6.488  | 12.136 | 0.00 | 0.00 | O |
| ATOM | 1544 | H    | GLU | 99 | 10.740 | 2.271  | 8.780  | 0.00 | 0.00 | H |
| ATOM | 1545 | HA   | GLU | 99 | 9.812  | 3.002  | 11.449 | 0.00 | 0.00 | H |

|      |      |      |     |     |        |        |        |      |      |   |
|------|------|------|-----|-----|--------|--------|--------|------|------|---|
| ATOM | 1546 | ZHB  | GLU | 99  | 10.730 | 4.649  | 9.799  | 0.00 | 0.00 | H |
| ATOM | 1547 | 3HB  | GLU | 99  | 9.369  | 4.302  | 8.731  | 0.00 | 0.00 | H |
| ATOM | 1548 | ZHG  | GLU | 99  | 8.963  | 6.361  | 9.940  | 0.00 | 0.00 | H |
| ATOM | 1549 | 3HG  | GLU | 99  | 7.796  | 5.154  | 10.462 | 0.00 | 0.00 | H |
| ATOM | 1550 | N    | PHE | 100 | 7.810  | 1.652  | 9.192  | 0.00 | 0.00 | N |
| ATOM | 1551 | CA   | PHE | 100 | 6.520  | 0.984  | 9.009  | 0.00 | 0.00 | C |
| ATOM | 1552 | C    | PHE | 100 | 6.401  | -0.288 | 9.860  | 0.00 | 0.00 | C |
| ATOM | 1553 | O    | PHE | 100 | 5.282  | -0.739 | 10.093 | 0.00 | 0.00 | O |
| ATOM | 1554 | CB   | PHE | 100 | 6.310  | 0.654  | 7.522  | 0.00 | 0.00 | C |
| ATOM | 1555 | CG   | PHE | 100 | 6.015  | 1.802  | 6.564  | 0.00 | 0.00 | C |
| ATOM | 1556 | CD1  | PHE | 100 | 5.815  | 1.496  | 5.203  | 0.00 | 0.00 | C |
| ATOM | 1557 | CD2  | PHE | 100 | 5.902  | 3.144  | 6.990  | 0.00 | 0.00 | C |
| ATOM | 1558 | CE1  | PHE | 100 | 5.501  | 2.510  | 4.282  | 0.00 | 0.00 | C |
| ATOM | 1559 | CE2  | PHE | 100 | 5.581  | 4.156  | 6.068  | 0.00 | 0.00 | C |
| ATOM | 1560 | CZ   | PHE | 100 | 5.373  | 3.837  | 4.717  | 0.00 | 0.00 | C |
| ATOM | 1561 | H    | PHE | 100 | 8.511  | 1.501  | 8.481  | 0.00 | 0.00 | H |
| ATOM | 1562 | HA   | PHE | 100 | 5.724  | 1.658  | 9.326  | 0.00 | 0.00 | H |
| ATOM | 1563 | ZHB  | PHE | 100 | 7.186  | 0.118  | 7.162  | 0.00 | 0.00 | H |
| ATOM | 1564 | 3HB  | PHE | 100 | 5.472  | -0.037 | 7.448  | 0.00 | 0.00 | H |
| ATOM | 1565 | HD1  | PHE | 100 | 5.894  | 0.474  | 4.861  | 0.00 | 0.00 | H |
| ATOM | 1566 | HD2  | PHE | 100 | 6.050  | 3.417  | 8.023  | 0.00 | 0.00 | H |
| ATOM | 1567 | HE1  | PHE | 100 | 5.355  | 2.267  | 3.241  | 0.00 | 0.00 | H |
| ATOM | 1568 | HE2  | PHE | 100 | 5.492  | 5.180  | 6.403  | 0.00 | 0.00 | H |
| ATOM | 1569 | HZ   | PHE | 100 | 5.116  | 4.612  | 4.010  | 0.00 | 0.00 | H |
| ATOM | 1570 | N    | GLN | 101 | 7.522  | -0.842 | 10.346 | 0.00 | 0.00 | N |
| ATOM | 1571 | CA   | GLN | 101 | 7.554  | -1.942 | 11.307 | 0.00 | 0.00 | C |
| ATOM | 1572 | C    | GLN | 101 | 7.431  | -1.416 | 12.743 | 0.00 | 0.00 | C |
| ATOM | 1573 | O    | GLN | 101 | 6.964  | -2.154 | 13.609 | 0.00 | 0.00 | O |
| ATOM | 1574 | CB   | GLN | 101 | 8.852  | -2.747 | 11.119 | 0.00 | 0.00 | C |
| ATOM | 1575 | CG   | GLN | 101 | 8.846  | -3.597 | 9.834  | 0.00 | 0.00 | C |
| ATOM | 1576 | CD   | GLN | 101 | 7.847  | -4.757 | 9.856  | 0.00 | 0.00 | C |
| ATOM | 1577 | NE2  | GLN | 101 | 7.343  | -5.135 | 8.677  | 0.00 | 0.00 | N |
| ATOM | 1578 | OE1  | GLN | 101 | 7.541  | -5.318 | 10.906 | 0.00 | 0.00 | O |
| ATOM | 1579 | H    | GLN | 101 | 8.411  | -0.428 | 10.103 | 0.00 | 0.00 | H |
| ATOM | 1580 | HA   | GLN | 101 | 6.708  | -2.603 | 11.121 | 0.00 | 0.00 | H |
| ATOM | 1581 | ZHB  | GLN | 101 | 9.698  | -2.058 | 11.086 | 0.00 | 0.00 | H |
| ATOM | 1582 | 3HB  | GLN | 101 | 8.997  | -3.406 | 11.976 | 0.00 | 0.00 | H |
| ATOM | 1583 | ZHG  | GLN | 101 | 8.623  | -2.959 | 8.981  | 0.00 | 0.00 | H |
| ATOM | 1584 | 3HG  | GLN | 101 | 9.844  | -4.009 | 9.682  | 0.00 | 0.00 | H |
| ATOM | 1585 | 1HE2 | GLN | 101 | 6.684  | -5.897 | 8.632  | 0.00 | 0.00 | H |
| ATOM | 1586 | 2HE2 | GLN | 101 | 7.622  | -4.654 | 7.834  | 0.00 | 0.00 | H |
| ATOM | 1587 | N    | THR | 102 | 7.792  | -0.145 | 12.986 | 0.00 | 0.00 | N |
| ATOM | 1588 | CA   | THR | 102 | 7.536  | 0.557  | 14.242 | 0.00 | 0.00 | C |
| ATOM | 1589 | C    | THR | 102 | 6.058  | 0.973  | 14.333 | 0.00 | 0.00 | C |
| ATOM | 1590 | O    | THR | 102 | 5.530  | 1.065  | 15.439 | 0.00 | 0.00 | O |
| ATOM | 1591 | CB   | THR | 102 | 8.492  | 1.761  | 14.353 | 0.00 | 0.00 | C |
| ATOM | 1592 | CG2  | THR | 102 | 8.275  | 2.594  | 15.624 | 0.00 | 0.00 | C |
| ATOM | 1593 | OG1  | THR | 102 | 9.832  | 1.310  | 14.352 | 0.00 | 0.00 | O |
| ATOM | 1594 | H    | THR | 102 | 8.179  | 0.403  | 12.231 | 0.00 | 0.00 | H |
| ATOM | 1595 | HA   | THR | 102 | 7.748  | -0.122 | 15.069 | 0.00 | 0.00 | H |
| ATOM | 1596 | HB   | THR | 102 | 8.349  | 2.411  | 13.493 | 0.00 | 0.00 | H |
| ATOM | 1597 | 1HG  | THR | 102 | 10.410 | 2.077  | 14.340 | 0.00 | 0.00 | H |
| ATOM | 1598 | 1HG2 | THR | 102 | 8.291  | 1.949  | 16.504 | 0.00 | 0.00 | H |
| ATOM | 1599 | 2HG2 | THR | 102 | 9.060  | 3.345  | 15.712 | 0.00 | 0.00 | H |
| ATOM | 1600 | 3HG2 | THR | 102 | 7.317  | 3.110  | 15.571 | 0.00 | 0.00 | H |
| ATOM | 1601 | N    | MET | 103 | 5.372  | 1.164  | 13.193 | 0.00 | 0.00 | N |
| ATOM | 1602 | CA   | MET | 103 | 3.932  | 1.400  | 13.162 | 0.00 | 0.00 | C |
| ATOM | 1603 | C    | MET | 103 | 3.139  | 0.130  | 13.503 | 0.00 | 0.00 | C |
| ATOM | 1604 | O    | MET | 103 | 2.003  | 0.265  | 13.952 | 0.00 | 0.00 | O |
| ATOM | 1605 | CB   | MET | 103 | 3.506  | 1.937  | 11.788 | 0.00 | 0.00 | C |
| ATOM | 1606 | CG   | MET | 103 | 3.962  | 3.369  | 11.512 | 0.00 | 0.00 | C |
| ATOM | 1607 | SD   | MET | 103 | 3.518  | 3.932  | 9.847  | 0.00 | 0.00 | S |
| ATOM | 1608 | CE   | MET | 103 | 4.459  | 5.474  | 9.797  | 0.00 | 0.00 | C |
| ATOM | 1609 | H    | MET | 103 | 5.849  | 1.077  | 12.307 | 0.00 | 0.00 | H |
| ATOM | 1610 | HA   | MET | 103 | 3.693  | 2.157  | 13.910 | 0.00 | 0.00 | H |
| ATOM | 1611 | ZHB  | MET | 103 | 3.902  | 1.285  | 11.012 | 0.00 | 0.00 | H |
| ATOM | 1612 | 3HB  | MET | 103 | 2.418  | 1.922  | 11.730 | 0.00 | 0.00 | H |
| ATOM | 1613 | ZHG  | MET | 103 | 3.507  | 4.037  | 12.243 | 0.00 | 0.00 | H |
| ATOM | 1614 | 3HG  | MET | 103 | 5.042  | 3.429  | 11.623 | 0.00 | 0.00 | H |
| ATOM | 1615 | 1HE  | MET | 103 | 5.517  | 5.258  | 9.939  | 0.00 | 0.00 | H |
| ATOM | 1616 | 2HE  | MET | 103 | 4.317  | 5.955  | 8.831  | 0.00 | 0.00 | H |
| ATOM | 1617 | 3HE  | MET | 103 | 4.112  | 6.134  | 10.591 | 0.00 | 0.00 | H |
| ATOM | 1618 | N    | LEU | 104 | 3.718  | -1.076 | 13.341 | 0.00 | 0.00 | N |
| ATOM | 1619 | CA   | LEU | 104 | 3.101  | -2.334 | 13.770 | 0.00 | 0.00 | C |
| ATOM | 1620 | C    | LEU | 104 | 3.287  | -2.591 | 15.272 | 0.00 | 0.00 | C |
| ATOM | 1621 | O    | LEU | 104 | 2.485  | -3.319 | 15.857 | 0.00 | 0.00 | O |
| ATOM | 1622 | CB   | LEU | 104 | 3.641  | -3.531 | 12.964 | 0.00 | 0.00 | C |
| ATOM | 1623 | CG   | LEU | 104 | 3.422  | -3.470 | 11.440 | 0.00 | 0.00 | C |
| ATOM | 1624 | CD1  | LEU | 104 | 3.901  | -4.784 | 10.807 | 0.00 | 0.00 | C |
| ATOM | 1625 | CD2  | LEU | 104 | 1.959  | -3.227 | 11.049 | 0.00 | 0.00 | C |
| ATOM | 1626 | H    | LEU | 104 | 4.655  | -1.125 | 12.966 | 0.00 | 0.00 | H |
| ATOM | 1627 | HA   | LEU | 104 | 2.032  | -2.266 | 13.590 | 0.00 | 0.00 | H |
| ATOM | 1628 | ZHB  | LEU | 104 | 4.709  | -3.630 | 13.160 | 0.00 | 0.00 | H |
| ATOM | 1629 | 3HB  | LEU | 104 | 3.153  | -4.431 | 13.341 | 0.00 | 0.00 | H |
| ATOM | 1630 | HG   | LEU | 104 | 4.022  | -2.660 | 11.036 | 0.00 | 0.00 | H |
| ATOM | 1631 | 1HD1 | LEU | 104 | 3.295  | -5.618 | 11.164 | 0.00 | 0.00 | H |
| ATOM | 1632 | 2HD1 | LEU | 104 | 4.941  | -4.961 | 11.073 | 0.00 | 0.00 | H |
| ATOM | 1633 | 3HD1 | LEU | 104 | 3.825  | -4.729 | 9.721  | 0.00 | 0.00 | H |
| ATOM | 1634 | 1HD2 | LEU | 104 | 1.339  | -4.033 | 11.434 | 0.00 | 0.00 | H |
| ATOM | 1635 | 2HD2 | LEU | 104 | 1.607  | -2.278 | 11.451 | 0.00 | 0.00 | H |
| ATOM | 1636 | 3HD2 | LEU | 104 | 1.869  | -3.183 | 9.966  | 0.00 | 0.00 | H |
| ATOM | 1637 | N    | GLN | 105 | 4.302  | -1.972 | 15.897 | 0.00 | 0.00 | N |
| ATOM | 1638 | CA   | GLN | 105 | 4.501  | -1.973 | 17.347 | 0.00 | 0.00 | C |
| ATOM | 1639 | C    | GLN | 105 | 3.497  | -1.043 | 18.057 | 0.00 | 0.00 | C |
| ATOM | 1640 | O    | GLN | 105 | 3.426  | -1.061 | 19.286 | 0.00 | 0.00 | O |
| ATOM | 1641 | CB   | GLN | 105 | 5.947  | -1.560 | 17.674 | 0.00 | 0.00 | C |
| ATOM | 1642 | CG   | GLN | 105 | 6.992  | -2.564 | 17.154 | 0.00 | 0.00 | C |
| ATOM | 1643 | CD   | GLN | 105 | 8.435  | -2.056 | 17.254 | 0.00 | 0.00 | C |
| ATOM | 1644 | NE2  | GLN | 105 | 9.380  | -2.858 | 16.757 | 0.00 | 0.00 | N |
| ATOM | 1645 | OE1  | GLN | 105 | 8.704  | -0.965 | 17.756 | 0.00 | 0.00 | O |
| ATOM | 1646 | H    | GLN | 105 | 4.928  | -1.396 | 15.353 | 0.00 | 0.00 | H |
| ATOM | 1647 | HA   | GLN | 105 | 4.343  | -2.986 | 17.718 | 0.00 | 0.00 | H |
| ATOM | 1648 | ZHB  | GLN | 105 | 6.141  | -0.579 | 17.245 | 0.00 | 0.00 | H |
| ATOM | 1649 | 3HB  | GLN | 105 | 6.061  | -1.482 | 18.755 | 0.00 | 0.00 | H |
| ATOM | 1650 | ZHG  | GLN | 105 | 6.903  | -3.491 | 17.721 | 0.00 | 0.00 | H |

|      |      |      |     |     |         |        |        |      |      |   |
|------|------|------|-----|-----|---------|--------|--------|------|------|---|
| ATOM | 1651 | 3HG  | GLN | 105 | 6.791   | -2.798 | 16.110 | 0.00 | 0.00 | H |
| ATOM | 1652 | 1HE2 | GLN | 105 | 10.349  | -2.576 | 16.791 | 0.00 | 0.00 | H |
| ATOM | 1653 | 2HE2 | GLN | 105 | 9.124   | -3.746 | 16.348 | 0.00 | 0.00 | H |
| ATOM | 1654 | N    | HIP | 106 | 2.724   | -0.255 | 17.290 | 0.00 | 0.00 | N |
| ATOM | 1655 | CA   | HIP | 106 | 1.685   | 0.654  | 17.766 | 0.00 | 0.00 | C |
| ATOM | 1656 | C    | HIP | 106 | 0.304   | 0.292  | 17.183 | 0.00 | 0.00 | C |
| ATOM | 1657 | O    | HIP | 106 | -0.698  | 0.866  | 17.611 | 0.00 | 0.00 | O |
| ATOM | 1658 | CB   | HIP | 106 | 2.089   | 2.096  | 17.423 | 0.00 | 0.00 | C |
| ATOM | 1659 | CG   | HIP | 106 | 3.464   | 2.497  | 17.910 | 0.00 | 0.00 | C |
| ATOM | 1660 | CD2  | HIP | 106 | 4.382   | 3.230  | 17.211 | 0.00 | 0.00 | C |
| ATOM | 1661 | ND1  | HIP | 106 | 4.042   | 2.156  | 19.121 | 0.00 | 0.00 | N |
| ATOM | 1662 | CE1  | HIP | 106 | 5.286   | 2.668  | 19.148 | 0.00 | 0.00 | C |
| ATOM | 1663 | NE2  | HIP | 106 | 5.512   | 3.326  | 17.996 | 0.00 | 0.00 | N |
| ATOM | 1664 | H    | HIP | 106 | 2.849   | -0.297 | 16.289 | 0.00 | 0.00 | H |
| ATOM | 1665 | HA   | HIP | 106 | 1.610   | 0.575  | 18.851 | 0.00 | 0.00 | H |
| ATOM | 1666 | 2HB  | HIP | 106 | 2.064   | 2.212  | 16.341 | 0.00 | 0.00 | H |
| ATOM | 1667 | 3HB  | HIP | 106 | 1.360   | 2.782  | 17.854 | 0.00 | 0.00 | H |
| ATOM | 1668 | HD1  | HIP | 106 | 3.612   | 1.602  | 19.848 | 0.00 | 0.00 | H |
| ATOM | 1669 | HD2  | HIP | 106 | 4.262   | 3.626  | 16.214 | 0.00 | 0.00 | H |
| ATOM | 1670 | HE1  | HIP | 106 | 5.990   | 2.562  | 19.959 | 0.00 | 0.00 | H |
| ATOM | 1671 | HE2  | HIP | 106 | 6.367   | 3.803  | 17.745 | 0.00 | 0.00 | H |
| ATOM | 1672 | N    | LEU | 107 | 0.245   | -0.663 | 16.238 | 0.00 | 0.00 | N |
| ATOM | 1673 | CA   | LEU | 107 | -0.981  | -1.199 | 15.657 | 0.00 | 0.00 | C |
| ATOM | 1674 | C    | LEU | 107 | -1.587  | -2.238 | 16.604 | 0.00 | 0.00 | C |
| ATOM | 1675 | O    | LEU | 107 | -0.858  | -3.025 | 17.213 | 0.00 | 0.00 | O |
| ATOM | 1676 | CB   | LEU | 107 | -0.660  | -1.817 | 14.283 | 0.00 | 0.00 | C |
| ATOM | 1677 | CG   | LEU | 107 | -1.876  | -2.292 | 13.466 | 0.00 | 0.00 | C |
| ATOM | 1678 | CD1  | LEU | 107 | -2.790  | -1.123 | 13.088 | 0.00 | 0.00 | C |
| ATOM | 1679 | CD2  | LEU | 107 | -1.400  | -2.974 | 12.179 | 0.00 | 0.00 | C |
| ATOM | 1680 | H    | LEU | 107 | 1.108   | -1.087 | 15.931 | 0.00 | 0.00 | H |
| ATOM | 1681 | HA   | LEU | 107 | -1.682  | -0.375 | 15.522 | 0.00 | 0.00 | H |
| ATOM | 1682 | 2HB  | LEU | 107 | -0.125  | -1.082 | 13.684 | 0.00 | 0.00 | H |
| ATOM | 1683 | 3HB  | LEU | 107 | 0.000   | -2.670 | 14.445 | 0.00 | 0.00 | H |
| ATOM | 1684 | HG   | LEU | 107 | -2.445  | -3.020 | 14.044 | 0.00 | 0.00 | H |
| ATOM | 1685 | 1HD1 | LEU | 107 | -3.248  | -0.700 | 13.981 | 0.00 | 0.00 | H |
| ATOM | 1686 | 2HD1 | LEU | 107 | -2.211  | -0.361 | 12.569 | 0.00 | 0.00 | H |
| ATOM | 1687 | 3HD1 | LEU | 107 | -3.575  | -1.467 | 12.421 | 0.00 | 0.00 | H |
| ATOM | 1688 | 1HD2 | LEU | 107 | -2.247  | -3.429 | 11.668 | 0.00 | 0.00 | H |
| ATOM | 1689 | 2HD2 | LEU | 107 | -0.924  | -2.250 | 11.518 | 0.00 | 0.00 | H |
| ATOM | 1690 | 3HD2 | LEU | 107 | -0.686  | -3.754 | 12.428 | 0.00 | 0.00 | H |
| ATOM | 1691 | N    | GLN | 108 | -2.924  | -2.256 | 16.700 | 0.00 | 0.00 | N |
| ATOM | 1692 | CA   | GLN | 108 | -3.650  | -3.168 | 17.573 | 0.00 | 0.00 | C |
| ATOM | 1693 | C    | GLN | 108 | -3.691  | -4.582 | 16.971 | 0.00 | 0.00 | C |
| ATOM | 1694 | O    | GLN | 108 | -3.875  | -4.713 | 15.759 | 0.00 | 0.00 | O |
| ATOM | 1695 | CB   | GLN | 108 | -5.075  | -2.650 | 17.835 | 0.00 | 0.00 | C |
| ATOM | 1696 | CG   | GLN | 108 | -5.108  | -1.294 | 18.561 | 0.00 | 0.00 | C |
| ATOM | 1697 | CD   | GLN | 108 | -4.444  | -1.302 | 19.943 | 0.00 | 0.00 | C |
| ATOM | 1698 | NE2  | GLN | 108 | -3.957  | -0.136 | 20.377 | 0.00 | 0.00 | N |
| ATOM | 1699 | OE1  | GLN | 108 | -4.380  | -2.327 | 20.619 | 0.00 | 0.00 | O |
| ATOM | 1700 | H    | GLN | 108 | -3.467  | -1.594 | 16.163 | 0.00 | 0.00 | H |
| ATOM | 1701 | HA   | GLN | 108 | -3.117  | -3.196 | 18.521 | 0.00 | 0.00 | H |
| ATOM | 1702 | 2HB  | GLN | 108 | -5.600  | -2.552 | 16.883 | 0.00 | 0.00 | H |
| ATOM | 1703 | 3HB  | GLN | 108 | -5.612  | -3.383 | 18.438 | 0.00 | 0.00 | H |
| ATOM | 1704 | 2HG  | GLN | 108 | -4.635  | -0.539 | 17.932 | 0.00 | 0.00 | H |
| ATOM | 1705 | 3HG  | GLN | 108 | -6.148  | -1.003 | 18.693 | 0.00 | 0.00 | H |
| ATOM | 1706 | 1HE2 | GLN | 108 | -3.516  | -0.082 | 21.283 | 0.00 | 0.00 | H |
| ATOM | 1707 | 2HE2 | GLN | 108 | -4.032  | 0.689  | 19.801 | 0.00 | 0.00 | H |
| ATOM | 1708 | N    | PRO | 109 | -3.569  | -5.645 | 17.795 | 0.00 | 0.00 | N |
| ATOM | 1709 | CA   | PRO | 109 | -3.664  | -7.029 | 17.341 | 0.00 | 0.00 | C |
| ATOM | 1710 | C    | PRO | 109 | -5.103  | -7.427 | 16.975 | 0.00 | 0.00 | C |
| ATOM | 1711 | O    | PRO | 109 | -5.287  | -8.384 | 16.224 | 0.00 | 0.00 | O |
| ATOM | 1712 | CB   | PRO | 109 | -3.122  | -7.868 | 18.501 | 0.00 | 0.00 | C |
| ATOM | 1713 | CG   | PRO | 109 | -3.501  | -7.043 | 19.729 | 0.00 | 0.00 | C |
| ATOM | 1714 | CD   | PRO | 109 | -3.341  | -5.606 | 19.234 | 0.00 | 0.00 | C |
| ATOM | 1715 | HA   | PRO | 109 | -3.026  | -7.172 | 16.470 | 0.00 | 0.00 | H |
| ATOM | 1716 | 2HB  | PRO | 109 | -2.035  | -7.932 | 18.426 | 0.00 | 0.00 | H |
| ATOM | 1717 | 3HB  | PRO | 109 | -3.558  | -8.867 | 18.532 | 0.00 | 0.00 | H |
| ATOM | 1718 | 2HG  | PRO | 109 | -4.544  | -7.228 | 19.990 | 0.00 | 0.00 | H |
| ATOM | 1719 | 3HG  | PRO | 109 | -2.849  | -7.253 | 20.577 | 0.00 | 0.00 | H |
| ATOM | 1720 | 2HD  | PRO | 109 | -4.062  | -4.958 | 19.731 | 0.00 | 0.00 | H |
| ATOM | 1721 | 3HD  | PRO | 109 | -2.325  | -5.260 | 19.428 | 0.00 | 0.00 | H |
| ATOM | 1722 | N    | THR | 110 | -6.107  | -6.676 | 17.461 | 0.00 | 0.00 | N |
| ATOM | 1723 | CA   | THR | 110 | -7.489  | -6.771 | 17.008 | 0.00 | 0.00 | C |
| ATOM | 1724 | C    | THR | 110 | -7.584  | -6.122 | 15.625 | 0.00 | 0.00 | C |
| ATOM | 1725 | O    | THR | 110 | -7.152  | -4.985 | 15.439 | 0.00 | 0.00 | O |
| ATOM | 1726 | CB   | THR | 110 | -8.459  | -6.127 | 18.017 | 0.00 | 0.00 | C |
| ATOM | 1727 | CG2  | THR | 110 | -8.492  | -6.900 | 19.342 | 0.00 | 0.00 | C |
| ATOM | 1728 | OG1  | THR | 110 | -8.123  | -4.778 | 18.278 | 0.00 | 0.00 | O |
| ATOM | 1729 | H    | THR | 110 | -5.886  | -5.913 | 18.085 | 0.00 | 0.00 | H |
| ATOM | 1730 | HA   | THR | 110 | -7.752  | -7.827 | 16.917 | 0.00 | 0.00 | H |
| ATOM | 1731 | HB   | THR | 110 | -9.461  | -6.152 | 17.587 | 0.00 | 0.00 | H |
| ATOM | 1732 | 1HG  | THR | 110 | -8.789  | -4.405 | 18.859 | 0.00 | 0.00 | H |
| ATOM | 1733 | 1HG2 | THR | 110 | -7.516  | -6.866 | 19.827 | 0.00 | 0.00 | H |
| ATOM | 1734 | 2HG2 | THR | 110 | -9.235  | -6.456 | 20.004 | 0.00 | 0.00 | H |
| ATOM | 1735 | 3HG2 | THR | 110 | -8.764  | -7.939 | 19.155 | 0.00 | 0.00 | H |
| ATOM | 1736 | N    | ALA | 111 | -8.143  | -6.866 | 14.662 | 0.00 | 0.00 | N |
| ATOM | 1737 | CA   | ALA | 111 | -8.165  | -6.489 | 13.252 | 0.00 | 0.00 | C |
| ATOM | 1738 | C    | ALA | 111 | -9.245  | -5.445 | 12.916 | 0.00 | 0.00 | C |
| ATOM | 1739 | O    | ALA | 111 | -9.217  | -4.882 | 11.821 | 0.00 | 0.00 | O |
| ATOM | 1740 | CB   | ALA | 111 | -8.334  | -7.763 | 12.421 | 0.00 | 0.00 | C |
| ATOM | 1741 | H    | ALA | 111 | -8.493  | -7.784 | 14.895 | 0.00 | 0.00 | H |
| ATOM | 1742 | HA   | ALA | 111 | -7.194  | -6.061 | 13.004 | 0.00 | 0.00 | H |
| ATOM | 1743 | 1HB  | ALA | 111 | -8.213  | -7.525 | 11.367 | 0.00 | 0.00 | H |
| ATOM | 1744 | 2HB  | ALA | 111 | -7.571  | -8.489 | 12.701 | 0.00 | 0.00 | H |
| ATOM | 1745 | 3HB  | ALA | 111 | -9.323  | -8.193 | 12.587 | 0.00 | 0.00 | H |
| ATOM | 1746 | N    | GLU | 112 | -10.170 | -5.173 | 13.851 | 0.00 | 0.00 | N |
| ATOM | 1747 | CA   | GLU | 112 | -11.221 | -4.173 | 13.715 | 0.00 | 0.00 | C |
| ATOM | 1748 | C    | GLU | 112 | -10.715 | -2.786 | 14.136 | 0.00 | 0.00 | C |
| ATOM | 1749 | O    | GLU | 112 | -11.020 | -1.805 | 13.459 | 0.00 | 0.00 | O |
| ATOM | 1750 | CB   | GLU | 112 | -12.431 | -4.622 | 14.551 | 0.00 | 0.00 | C |
| ATOM | 1751 | CG   | GLU | 112 | -13.646 | -3.701 | 14.376 | 0.00 | 0.00 | C |
| ATOM | 1752 | CD   | GLU | 112 | -14.845 | -4.220 | 15.168 | 0.00 | 0.00 | C |
| ATOM | 1753 | OE1  | GLU | 112 | -14.940 | -3.859 | 16.362 | 0.00 | 0.00 | O |
| ATOM | 1754 | OE2  | GLU | 112 | -15.645 | -4.972 | 14.569 | 0.00 | 0.00 | O |
| ATOM | 1755 | H    | GLU | 112 | -10.132 | -5.673 | 14.728 | 0.00 | 0.00 | H |

|      |      |      |     |     |         |        |        |      |      |   |
|------|------|------|-----|-----|---------|--------|--------|------|------|---|
| ATOM | 1756 | HA   | GLU | 112 | -11.531 | -4.128 | 12.669 | 0.00 | 0.00 | H |
| ATOM | 1757 | ZHB  | GLU | 112 | -12.714 | -5.630 | 14.242 | 0.00 | 0.00 | H |
| ATOM | 1758 | 3HB  | GLU | 112 | -12.151 | -4.652 | 15.605 | 0.00 | 0.00 | H |
| ATOM | 1759 | ZHG  | GLU | 112 | -13.400 | -2.696 | 14.724 | 0.00 | 0.00 | H |
| ATOM | 1760 | 3HG  | GLU | 112 | -13.907 | -3.645 | 13.319 | 0.00 | 0.00 | H |
| ATOM | 1761 | N    | ASN | 113 | -9.921  | -2.712 | 15.218 | 0.00 | 0.00 | N |
| ATOM | 1762 | CA   | ASN | 113 | -9.294  | -1.474 | 15.686 | 0.00 | 0.00 | C |
| ATOM | 1763 | C    | ASN | 113 | -7.947  | -1.210 | 14.990 | 0.00 | 0.00 | C |
| ATOM | 1764 | O    | ASN | 113 | -7.351  | -0.150 | 15.190 | 0.00 | 0.00 | O |
| ATOM | 1765 | CB   | ASN | 113 | -9.170  | -1.503 | 17.217 | 0.00 | 0.00 | C |
| ATOM | 1766 | CG   | ASN | 113 | -9.189  | -0.090 | 17.807 | 0.00 | 0.00 | C |
| ATOM | 1767 | ND2  | ASN | 113 | -10.389 | 0.448  | 18.036 | 0.00 | 0.00 | N |
| ATOM | 1768 | OD1  | ASN | 113 | -8.145  | 0.514  | 18.037 | 0.00 | 0.00 | O |
| ATOM | 1769 | H    | ASN | 113 | -9.704  | -3.557 | 15.726 | 0.00 | 0.00 | H |
| ATOM | 1770 | HA   | ASN | 113 | -9.964  | -0.653 | 15.427 | 0.00 | 0.00 | H |
| ATOM | 1771 | ZHB  | ASN | 113 | -10.008 | -2.059 | 17.639 | 0.00 | 0.00 | H |
| ATOM | 1772 | 3HB  | ASN | 113 | -8.250  | -2.014 | 17.503 | 0.00 | 0.00 | H |
| ATOM | 1773 | 1HD2 | ASN | 113 | -10.457 | 1.385  | 18.409 | 0.00 | 0.00 | H |
| ATOM | 1774 | ZHD2 | ASN | 113 | -11.227 | -0.075 | 17.827 | 0.00 | 0.00 | H |
| ATOM | 1775 | N    | ALA | 114 | -7.485  | -2.147 | 14.146 | 0.00 | 0.00 | N |
| ATOM | 1776 | CA   | ALA | 114 | -6.357  | -1.950 | 13.246 | 0.00 | 0.00 | C |
| ATOM | 1777 | C    | ALA | 114 | -6.733  | -1.028 | 12.072 | 0.00 | 0.00 | C |
| ATOM | 1778 | O    | ALA | 114 | -5.845  | -0.409 | 11.484 | 0.00 | 0.00 | O |
| ATOM | 1779 | CB   | ALA | 114 | -5.882  | -3.321 | 12.754 | 0.00 | 0.00 | C |
| ATOM | 1780 | H    | ALA | 114 | -8.008  | -3.004 | 14.038 | 0.00 | 0.00 | H |
| ATOM | 1781 | HA   | ALA | 114 | -5.547  | -1.489 | 13.809 | 0.00 | 0.00 | H |
| ATOM | 1782 | 1HB  | ALA | 114 | -6.669  | -3.806 | 12.176 | 0.00 | 0.00 | H |
| ATOM | 1783 | ZHB  | ALA | 114 | -5.001  | -3.208 | 12.128 | 0.00 | 0.00 | H |
| ATOM | 1784 | 3HB  | ALA | 114 | -5.613  | -3.948 | 13.603 | 0.00 | 0.00 | H |
| ATOM | 1785 | N    | TYR | 115 | -8.036  | -0.897 | 11.766 | 0.00 | 0.00 | N |
| ATOM | 1786 | CA   | TYR | 115 | -8.566  | 0.071  | 10.812 | 0.00 | 0.00 | C |
| ATOM | 1787 | C    | TYR | 115 | -8.722  | 1.465  | 11.431 | 0.00 | 0.00 | C |
| ATOM | 1788 | O    | TYR | 115 | -8.624  | 2.449  | 10.700 | 0.00 | 0.00 | O |
| ATOM | 1789 | CB   | TYR | 115 | -9.930  | -0.405 | 10.297 | 0.00 | 0.00 | C |
| ATOM | 1790 | CG   | TYR | 115 | -9.934  | -1.659 | 9.442  | 0.00 | 0.00 | C |
| ATOM | 1791 | CD1  | TYR | 115 | -9.000  | -1.818 | 8.399  | 0.00 | 0.00 | C |
| ATOM | 1792 | CD2  | TYR | 115 | -10.934 | -2.632 | 9.637  | 0.00 | 0.00 | C |
| ATOM | 1793 | CE1  | TYR | 115 | -9.058  | -2.940 | 7.558  | 0.00 | 0.00 | C |
| ATOM | 1794 | CE2  | TYR | 115 | -11.007 | -3.752 | 8.792  | 0.00 | 0.00 | C |
| ATOM | 1795 | CZ   | TYR | 115 | -10.067 | -3.911 | 7.747  | 0.00 | 0.00 | C |
| ATOM | 1796 | OH   | TYR | 115 | -10.143 | -4.992 | 6.921  | 0.00 | 0.00 | O |
| ATOM | 1797 | H    | TYR | 115 | -8.712  | -1.441 | 12.283 | 0.00 | 0.00 | H |
| ATOM | 1798 | HA   | TYR | 115 | -7.878  | 0.155  | 9.972  | 0.00 | 0.00 | H |
| ATOM | 1799 | ZHB  | TYR | 115 | -10.591 | -0.550 | 11.152 | 0.00 | 0.00 | H |
| ATOM | 1800 | 3HB  | TYR | 115 | -10.365 | 0.393  | 9.700  | 0.00 | 0.00 | H |
| ATOM | 1801 | HD1  | TYR | 115 | -8.247  | -1.067 | 8.220  | 0.00 | 0.00 | H |
| ATOM | 1802 | HD2  | TYR | 115 | -11.666 | -2.511 | 10.423 | 0.00 | 0.00 | H |
| ATOM | 1803 | HE1  | TYR | 115 | -8.345  | -3.043 | 6.754  | 0.00 | 0.00 | H |
| ATOM | 1804 | HE2  | TYR | 115 | -11.790 | -4.481 | 8.935  | 0.00 | 0.00 | H |
| ATOM | 1805 | HH   | TYR | 115 | -10.869 | -5.581 | 7.142  | 0.00 | 0.00 | H |
| ATOM | 1806 | N    | GLU | 116 | -8.949  | 1.556  | 12.753 | 0.00 | 0.00 | N |
| ATOM | 1807 | CA   | GLU | 116 | -9.064  | 2.829  | 13.458 | 0.00 | 0.00 | C |
| ATOM | 1808 | C    | GLU | 116 | -7.704  | 3.536  | 13.505 | 0.00 | 0.00 | C |
| ATOM | 1809 | O    | GLU | 116 | -7.645  | 4.750  | 13.315 | 0.00 | 0.00 | O |
| ATOM | 1810 | CB   | GLU | 116 | -9.625  | 2.580  | 14.870 | 0.00 | 0.00 | C |
| ATOM | 1811 | CG   | GLU | 116 | -9.899  | 3.894  | 15.616 | 0.00 | 0.00 | C |
| ATOM | 1812 | CD   | GLU | 116 | -10.471 | 3.640  | 17.009 | 0.00 | 0.00 | C |
| ATOM | 1813 | OE1  | GLU | 116 | -9.667  | 3.651  | 17.967 | 0.00 | 0.00 | O |
| ATOM | 1814 | OE2  | GLU | 116 | -11.702 | 3.439  | 17.094 | 0.00 | 0.00 | O |
| ATOM | 1815 | H    | GLU | 116 | -9.020  | 0.711  | 13.302 | 0.00 | 0.00 | H |
| ATOM | 1816 | HA   | GLU | 116 | -9.770  | 3.460  | 12.915 | 0.00 | 0.00 | H |
| ATOM | 1817 | ZHB  | GLU | 116 | -10.558 | 2.022  | 14.788 | 0.00 | 0.00 | H |
| ATOM | 1818 | 3HB  | GLU | 116 | -8.915  | 1.988  | 15.446 | 0.00 | 0.00 | H |
| ATOM | 1819 | ZHG  | GLU | 116 | -8.971  | 4.457  | 15.717 | 0.00 | 0.00 | H |
| ATOM | 1820 | 3HG  | GLU | 116 | -10.604 | 4.496  | 15.042 | 0.00 | 0.00 | H |
| ATOM | 1821 | N    | TYR | 117 | -6.621  | 2.770  | 13.699 | 0.00 | 0.00 | N |
| ATOM | 1822 | CA   | TYR | 117 | -5.250  | 3.263  | 13.667 | 0.00 | 0.00 | C |
| ATOM | 1823 | C    | TYR | 117 | -4.857  | 3.726  | 12.259 | 0.00 | 0.00 | C |
| ATOM | 1824 | O    | TYR | 117 | -4.143  | 4.720  | 12.135 | 0.00 | 0.00 | O |
| ATOM | 1825 | CB   | TYR | 117 | -4.328  | 2.139  | 14.157 | 0.00 | 0.00 | C |
| ATOM | 1826 | CG   | TYR | 117 | -2.847  | 2.475  | 14.141 | 0.00 | 0.00 | C |
| ATOM | 1827 | CD1  | TYR | 117 | -2.216  | 2.962  | 15.303 | 0.00 | 0.00 | C |
| ATOM | 1828 | CD2  | TYR | 117 | -2.097  | 2.296  | 12.961 | 0.00 | 0.00 | C |
| ATOM | 1829 | CE1  | TYR | 117 | -0.844  | 3.269  | 15.287 | 0.00 | 0.00 | C |
| ATOM | 1830 | CE2  | TYR | 117 | -0.723  | 2.588  | 12.941 | 0.00 | 0.00 | C |
| ATOM | 1831 | CZ   | TYR | 117 | -0.093  | 3.077  | 14.104 | 0.00 | 0.00 | C |
| ATOM | 1832 | OH   | TYR | 117 | 1.237   | 3.366  | 14.077 | 0.00 | 0.00 | O |
| ATOM | 1833 | H    | TYR | 117 | -6.745  | 1.778  | 13.842 | 0.00 | 0.00 | H |
| ATOM | 1834 | HA   | TYR | 117 | -5.166  | 4.109  | 14.348 | 0.00 | 0.00 | H |
| ATOM | 1835 | ZHB  | TYR | 117 | -4.616  | 1.867  | 15.173 | 0.00 | 0.00 | H |
| ATOM | 1836 | 3HB  | TYR | 117 | -4.490  | 1.262  | 13.529 | 0.00 | 0.00 | H |
| ATOM | 1837 | HD1  | TYR | 117 | -2.784  | 3.100  | 16.211 | 0.00 | 0.00 | H |
| ATOM | 1838 | HD2  | TYR | 117 | -2.575  | 1.932  | 12.063 | 0.00 | 0.00 | H |
| ATOM | 1839 | HE1  | TYR | 117 | -0.367  | 3.648  | 16.180 | 0.00 | 0.00 | H |
| ATOM | 1840 | HE2  | TYR | 117 | -0.154  | 2.443  | 12.036 | 0.00 | 0.00 | H |
| ATOM | 1841 | HH   | TYR | 117 | 1.565   | 3.701  | 14.915 | 0.00 | 0.00 | H |
| ATOM | 1842 | N    | PHE | 118 | -5.331  | 3.026  | 11.214 | 0.00 | 0.00 | N |
| ATOM | 1843 | CA   | PHE | 118 | -4.992  | 3.313  | 9.825  | 0.00 | 0.00 | C |
| ATOM | 1844 | C    | PHE | 118 | -5.690  | 4.576  | 9.306  | 0.00 | 0.00 | C |
| ATOM | 1845 | O    | PHE | 118 | -5.149  | 5.231  | 8.418  | 0.00 | 0.00 | O |
| ATOM | 1846 | CB   | PHE | 118 | -5.341  | 2.096  | 8.960  | 0.00 | 0.00 | C |
| ATOM | 1847 | CG   | PHE | 118 | -4.833  | 2.183  | 7.530  | 0.00 | 0.00 | C |
| ATOM | 1848 | CD1  | PHE | 118 | -3.511  | 1.802  | 7.229  | 0.00 | 0.00 | C |
| ATOM | 1849 | CD2  | PHE | 118 | -5.676  | 2.635  | 6.497  | 0.00 | 0.00 | C |
| ATOM | 1850 | CE1  | PHE | 118 | -3.043  | 1.851  | 5.904  | 0.00 | 0.00 | C |
| ATOM | 1851 | CE2  | PHE | 118 | -5.209  | 2.685  | 5.172  | 0.00 | 0.00 | C |
| ATOM | 1852 | CZ   | PHE | 118 | -3.895  | 2.283  | 4.874  | 0.00 | 0.00 | C |
| ATOM | 1853 | H    | PHE | 118 | -5.927  | 2.229  | 11.388 | 0.00 | 0.00 | H |
| ATOM | 1854 | HA   | PHE | 118 | -3.914  | 3.461  | 9.767  | 0.00 | 0.00 | H |
| ATOM | 1855 | ZHB  | PHE | 118 | -4.905  | 1.210  | 9.422  | 0.00 | 0.00 | H |
| ATOM | 1856 | 3HB  | PHE | 118 | -6.423  | 1.960  | 8.949  | 0.00 | 0.00 | H |
| ATOM | 1857 | HD1  | PHE | 118 | -2.857  | 1.456  | 8.015  | 0.00 | 0.00 | H |
| ATOM | 1858 | HD2  | PHE | 118 | -6.683  | 2.952  | 6.717  | 0.00 | 0.00 | H |
| ATOM | 1859 | HE1  | PHE | 118 | -2.030  | 1.553  | 5.679  | 0.00 | 0.00 | H |
| ATOM | 1860 | HE2  | PHE | 118 | -5.859  | 3.032  | 4.382  | 0.00 | 0.00 | H |

|      |      |      |     |     |         |        |        |      |      |   |
|------|------|------|-----|-----|---------|--------|--------|------|------|---|
| ATOM | 1861 | HZ   | PHE | 118 | -3.538  | 2.314  | 3.855  | 0.00 | 0.00 | H |
| ATOM | 1862 | N    | THR | 119 | -6.854  | 4.939  | 9.864  | 0.00 | 0.00 | N |
| ATOM | 1863 | CA   | THR | 119 | -7.591  | 6.148  | 9.504  | 0.00 | 0.00 | C |
| ATOM | 1864 | C    | THR | 119 | -7.003  | 7.376  | 10.217 | 0.00 | 0.00 | C |
| ATOM | 1865 | O    | THR | 119 | -7.024  | 8.467  | 9.651  | 0.00 | 0.00 | O |
| ATOM | 1866 | CB   | THR | 119 | -9.084  | 5.942  | 9.832  | 0.00 | 0.00 | C |
| ATOM | 1867 | CG2  | THR | 119 | -9.945  | 7.166  | 9.493  | 0.00 | 0.00 | C |
| ATOM | 1868 | OG1  | THR | 119 | -9.587  | 4.848  | 9.092  | 0.00 | 0.00 | O |
| ATOM | 1869 | H    | THR | 119 | -7.246  | 4.361  | 10.595 | 0.00 | 0.00 | H |
| ATOM | 1870 | HA   | THR | 119 | -7.502  | 6.305  | 8.428  | 0.00 | 0.00 | H |
| ATOM | 1871 | HB   | THR | 119 | -9.191  | 5.724  | 10.896 | 0.00 | 0.00 | H |
| ATOM | 1872 | 1HG  | THR | 119 | -9.123  | 4.054  | 9.369  | 0.00 | 0.00 | H |
| ATOM | 1873 | 1HG2 | THR | 119 | -10.998 | 6.930  | 9.653  | 0.00 | 0.00 | H |
| ATOM | 1874 | 2HG2 | THR | 119 | -9.682  | 8.003  | 10.139 | 0.00 | 0.00 | H |
| ATOM | 1875 | 3HG2 | THR | 119 | -9.797  | 7.451  | 8.450  | 0.00 | 0.00 | H |
| ATOM | 1876 | N    | LYS | 120 | -6.445  | 7.198  | 11.425 | 0.00 | 0.00 | N |
| ATOM | 1877 | CA   | LYS | 120 | -5.843  | 8.265  | 12.225 | 0.00 | 0.00 | C |
| ATOM | 1878 | C    | LYS | 120 | -4.439  | 8.668  | 11.734 | 0.00 | 0.00 | C |
| ATOM | 1879 | O    | LYS | 120 | -3.858  | 9.600  | 12.292 | 0.00 | 0.00 | O |
| ATOM | 1880 | CB   | LYS | 120 | -5.837  | 7.843  | 13.704 | 0.00 | 0.00 | C |
| ATOM | 1881 | CG   | LYS | 120 | -7.251  | 7.889  | 14.307 | 0.00 | 0.00 | C |
| ATOM | 1882 | CD   | LYS | 120 | -7.251  | 7.316  | 15.726 | 0.00 | 0.00 | C |
| ATOM | 1883 | CE   | LYS | 120 | -8.652  | 7.373  | 16.334 | 0.00 | 0.00 | C |
| ATOM | 1884 | NZ   | LYS | 120 | -8.669  | 6.790  | 17.686 | 0.00 | 0.00 | N |
| ATOM | 1885 | H    | LYS | 120 | -6.446  | 6.272  | 11.829 | 0.00 | 0.00 | H |
| ATOM | 1886 | HA   | LYS | 120 | -6.473  | 9.151  | 12.135 | 0.00 | 0.00 | H |
| ATOM | 1887 | 2HB  | LYS | 120 | -5.424  | 6.836  | 13.792 | 0.00 | 0.00 | H |
| ATOM | 1888 | 3HB  | LYS | 120 | -5.207  | 8.524  | 14.275 | 0.00 | 0.00 | H |
| ATOM | 1889 | 2HG  | LYS | 120 | -7.592  | 8.925  | 14.336 | 0.00 | 0.00 | H |
| ATOM | 1890 | 3HG  | LYS | 120 | -7.943  | 7.315  | 13.691 | 0.00 | 0.00 | H |
| ATOM | 1891 | 2HD  | LYS | 120 | -6.923  | 6.276  | 15.693 | 0.00 | 0.00 | H |
| ATOM | 1892 | 3HD  | LYS | 120 | -6.567  | 7.893  | 16.348 | 0.00 | 0.00 | H |
| ATOM | 1893 | 2HE  | LYS | 120 | -8.977  | 8.412  | 16.388 | 0.00 | 0.00 | H |
| ATOM | 1894 | 3HE  | LYS | 120 | -9.341  | 6.817  | 15.698 | 0.00 | 0.00 | H |
| ATOM | 1895 | 1HZ  | LYS | 120 | -9.602  | 6.847  | 18.067 | 0.00 | 0.00 | H |
| ATOM | 1896 | 2HZ  | LYS | 120 | -8.385  | 5.822  | 17.639 | 0.00 | 0.00 | H |
| ATOM | 1897 | 3HZ  | LYS | 120 | -8.029  | 7.298  | 18.281 | 0.00 | 0.00 | H |
| ATOM | 1898 | N    | ILE | 121 | -3.916  | 8.009  | 10.686 | 0.00 | 0.00 | N |
| ATOM | 1899 | CA   | ILE | 121 | -2.649  | 8.342  | 10.034 | 0.00 | 0.00 | C |
| ATOM | 1900 | C    | ILE | 121 | -2.852  | 8.700  | 8.555  | 0.00 | 0.00 | C |
| ATOM | 1901 | O    | ILE | 121 | -2.050  | 9.466  | 8.023  | 0.00 | 0.00 | O |
| ATOM | 1902 | CB   | ILE | 121 | -1.609  | 7.209  | 10.222 | 0.00 | 0.00 | C |
| ATOM | 1903 | CG1  | ILE | 121 | -2.054  | 5.894  | 9.546  | 0.00 | 0.00 | C |
| ATOM | 1904 | CG2  | ILE | 121 | -1.290  | 7.018  | 11.716 | 0.00 | 0.00 | C |
| ATOM | 1905 | CD1  | ILE | 121 | -1.088  | 4.721  | 9.727  | 0.00 | 0.00 | C |
| ATOM | 1906 | H    | ILE | 121 | -4.446  | 7.251  | 10.281 | 0.00 | 0.00 | H |
| ATOM | 1907 | HA   | ILE | 121 | -2.240  | 9.233  | 10.508 | 0.00 | 0.00 | H |
| ATOM | 1908 | HB   | ILE | 121 | -0.686  | 7.530  | 9.738  | 0.00 | 0.00 | H |
| ATOM | 1909 | 2HG1 | ILE | 121 | -3.020  | 5.596  | 9.944  | 0.00 | 0.00 | H |
| ATOM | 1910 | 3HG1 | ILE | 121 | -2.166  | 6.063  | 8.475  | 0.00 | 0.00 | H |
| ATOM | 1911 | 1HG2 | ILE | 121 | -1.050  | 7.980  | 12.159 | 0.00 | 0.00 | H |
| ATOM | 1912 | 2HG2 | ILE | 121 | -2.142  | 6.587  | 12.243 | 0.00 | 0.00 | H |
| ATOM | 1913 | 3HG2 | ILE | 121 | -0.426  | 6.366  | 11.839 | 0.00 | 0.00 | H |
| ATOM | 1914 | 1HD1 | ILE | 121 | -1.433  | 3.890  | 9.115  | 0.00 | 0.00 | H |
| ATOM | 1915 | 2HD1 | ILE | 121 | -0.082  | 5.004  | 9.418  | 0.00 | 0.00 | H |
| ATOM | 1916 | 3HD1 | ILE | 121 | -1.074  | 4.401  | 10.767 | 0.00 | 0.00 | H |
| ATOM | 1917 | N    | ALA | 122 | -3.909  | 8.178  | 7.906  | 0.00 | 0.00 | N |
| ATOM | 1918 | CA   | ALA | 122 | -4.157  | 8.326  | 6.472  | 0.00 | 0.00 | C |
| ATOM | 1919 | C    | ALA | 122 | -5.063  | 9.514  | 6.139  | 0.00 | 0.00 | C |
| ATOM | 1920 | O    | ALA | 122 | -4.963  | 10.049 | 5.037  | 0.00 | 0.00 | O |
| ATOM | 1921 | CB   | ALA | 122 | -4.773  | 7.035  | 5.936  | 0.00 | 0.00 | C |
| ATOM | 1922 | H    | ALA | 122 | -4.540  | 7.574  | 8.416  | 0.00 | 0.00 | H |
| ATOM | 1923 | HA   | ALA | 122 | -3.202  | 8.470  | 5.967  | 0.00 | 0.00 | H |
| ATOM | 1924 | 1HB  | ALA | 122 | -4.872  | 7.104  | 4.852  | 0.00 | 0.00 | H |
| ATOM | 1925 | 2HB  | ALA | 122 | -4.127  | 6.191  | 6.178  | 0.00 | 0.00 | H |
| ATOM | 1926 | 3HB  | ALA | 122 | -5.759  | 6.879  | 6.374  | 0.00 | 0.00 | H |
| ATOM | 1927 | N    | THR | 123 | -5.924  | 9.939  | 7.076  | 0.00 | 0.00 | N |
| ATOM | 1928 | CA   | THR | 123 | -6.691  | 11.179 | 6.960  | 0.00 | 0.00 | C |
| ATOM | 1929 | C    | THR | 123 | -5.765  | 12.370 | 7.227  | 0.00 | 0.00 | C |
| ATOM | 1930 | O    | THR | 123 | -5.900  | 13.404 | 6.576  | 0.00 | 0.00 | O |
| ATOM | 1931 | CB   | THR | 123 | -7.882  | 11.145 | 7.939  | 0.00 | 0.00 | C |
| ATOM | 1932 | CG2  | THR | 123 | -8.739  | 12.416 | 7.882  | 0.00 | 0.00 | C |
| ATOM | 1933 | OG1  | THR | 123 | -8.719  | 10.047 | 7.640  | 0.00 | 0.00 | O |
| ATOM | 1934 | H    | THR | 123 | -5.975  | 9.446  | 7.957  | 0.00 | 0.00 | H |
| ATOM | 1935 | HA   | THR | 123 | -7.081  | 11.262 | 5.946  | 0.00 | 0.00 | H |
| ATOM | 1936 | HB   | THR | 123 | -7.504  | 11.029 | 8.955  | 0.00 | 0.00 | H |
| ATOM | 1937 | 1HG  | THR | 123 | -8.220  | 9.238  | 7.775  | 0.00 | 0.00 | H |
| ATOM | 1938 | 1HG2 | THR | 123 | -8.156  | 13.279 | 8.205  | 0.00 | 0.00 | H |
| ATOM | 1939 | 2HG2 | THR | 123 | -9.100  | 12.581 | 6.868  | 0.00 | 0.00 | H |
| ATOM | 1940 | 3HG2 | THR | 123 | -9.593  | 12.310 | 8.552  | 0.00 | 0.00 | H |
| ATOM | 1941 | N    | SER | 124 | -4.803  | 12.193 | 8.147  | 0.00 | 0.00 | N |
| ATOM | 1942 | CA   | SER | 124 | -3.802  | 13.180 | 8.531  | 0.00 | 0.00 | C |
| ATOM | 1943 | C    | SER | 124 | -2.650  | 13.297 | 7.514  | 0.00 | 0.00 | C |
| ATOM | 1944 | O    | SER | 124 | -1.838  | 14.214 | 7.633  | 0.00 | 0.00 | O |
| ATOM | 1945 | CB   | SER | 124 | -3.267  | 12.796 | 9.914  | 0.00 | 0.00 | C |
| ATOM | 1946 | OG   | SER | 124 | -4.288  | 12.840 | 10.890 | 0.00 | 0.00 | O |
| ATOM | 1947 | H    | SER | 124 | -4.757  | 11.304 | 8.623  | 0.00 | 0.00 | H |
| ATOM | 1948 | HA   | SER | 124 | -4.287  | 14.151 | 8.615  | 0.00 | 0.00 | H |
| ATOM | 1949 | 2HB  | SER | 124 | -2.863  | 11.784 | 9.871  | 0.00 | 0.00 | H |
| ATOM | 1950 | 3HB  | SER | 124 | -2.476  | 13.489 | 10.204 | 0.00 | 0.00 | H |
| ATOM | 1951 | HG   | SER | 124 | -3.913  | 12.581 | 11.735 | 0.00 | 0.00 | H |
| ATOM | 1952 | N    | LEU | 125 | -2.574  | 12.389 | 6.525  | 0.00 | 0.00 | N |
| ATOM | 1953 | CA   | LEU | 125 | -1.492  | 12.310 | 5.547  | 0.00 | 0.00 | C |
| ATOM | 1954 | C    | LEU | 125 | -1.567  | 13.426 | 4.494  | 0.00 | 0.00 | C |
| ATOM | 1955 | O    | LEU | 125 | -0.521  | 13.875 | 4.032  | 0.00 | 0.00 | O |
| ATOM | 1956 | CB   | LEU | 125 | -1.545  | 10.913 | 4.898  | 0.00 | 0.00 | C |
| ATOM | 1957 | CG   | LEU | 125 | -0.494  | 10.611 | 3.811  | 0.00 | 0.00 | C |
| ATOM | 1958 | CD1  | LEU | 125 | 0.940   | 10.833 | 4.306  | 0.00 | 0.00 | C |
| ATOM | 1959 | CD2  | LEU | 125 | -0.637  | 9.151  | 3.361  | 0.00 | 0.00 | C |
| ATOM | 1960 | H    | LEU | 125 | -3.283  | 11.671 | 6.474  | 0.00 | 0.00 | H |
| ATOM | 1961 | HA   | LEU | 125 | -0.546  | 12.405 | 6.084  | 0.00 | 0.00 | H |
| ATOM | 1962 | 2HB  | LEU | 125 | -1.431  | 10.171 | 5.686  | 0.00 | 0.00 | H |
| ATOM | 1963 | 3HB  | LEU | 125 | -2.530  | 10.779 | 4.456  | 0.00 | 0.00 | H |
| ATOM | 1964 | HG   | LEU | 125 | -0.671  | 11.255 | 2.949  | 0.00 | 0.00 | H |
| ATOM | 1965 | 1HD1 | LEU | 125 | 1.103   | 10.288 | 5.236  | 0.00 | 0.00 | H |



|      |      |      |     |     |        |        |        |      |      |   |
|------|------|------|-----|-----|--------|--------|--------|------|------|---|
| ATOM | 1966 | ZHD1 | LEU | 125 | 1.109  | 11.892 | 4.477  | 0.00 | 0.00 | H |
| ATOM | 1967 | 3HD1 | LEU | 125 | 1.650  | 10.490 | 3.555  | 0.00 | 0.00 | H |
| ATOM | 1968 | 1HD2 | LEU | 125 | -1.637 | 8.977  | 2.969  | 0.00 | 0.00 | H |
| ATOM | 1969 | 2HD2 | LEU | 125 | 0.092  | 8.934  | 2.581  | 0.00 | 0.00 | H |
| ATOM | 1970 | 3HD2 | LEU | 125 | -0.467 | 8.478  | 4.200  | 0.00 | 0.00 | H |
| ATOM | 1971 | N    | PHE | 126 | -2.777 | 13.877 | 4.125  | 0.00 | 0.00 | N |
| ATOM | 1972 | CA   | PHE | 126 | -3.007 | 14.788 | 2.999  | 0.00 | 0.00 | C |
| ATOM | 1973 | C    | PHE | 126 | -3.421 | 16.201 | 3.442  | 0.00 | 0.00 | C |
| ATOM | 1974 | O    | PHE | 126 | -3.974 | 16.956 | 2.641  | 0.00 | 0.00 | O |
| ATOM | 1975 | CB   | PHE | 126 | -4.011 | 14.158 | 2.021  | 0.00 | 0.00 | C |
| ATOM | 1976 | CG   | PHE | 126 | -3.619 | 12.780 | 1.521  | 0.00 | 0.00 | C |
| ATOM | 1977 | CD1  | PHE | 126 | -2.795 | 12.634 | 0.389  | 0.00 | 0.00 | C |
| ATOM | 1978 | CD2  | PHE | 126 | -4.075 | 11.637 | 2.200  | 0.00 | 0.00 | C |
| ATOM | 1979 | CE1  | PHE | 126 | -2.451 | 11.351 | -0.074 | 0.00 | 0.00 | C |
| ATOM | 1980 | CE2  | PHE | 126 | -3.717 | 10.358 | 1.748  | 0.00 | 0.00 | C |
| ATOM | 1981 | CZ   | PHE | 126 | -2.909 | 10.212 | 0.608  | 0.00 | 0.00 | C |
| ATOM | 1982 | H    | PHE | 126 | -3.596 | 13.489 | 4.571  | 0.00 | 0.00 | H |
| ATOM | 1983 | HA   | PHE | 126 | -2.068 | 14.894 | 2.458  | 0.00 | 0.00 | H |
| ATOM | 1984 | ZHB  | PHE | 126 | -4.982 | 14.097 | 2.512  | 0.00 | 0.00 | H |
| ATOM | 1985 | ZHB  | PHE | 126 | -4.125 | 14.812 | 1.156  | 0.00 | 0.00 | H |
| ATOM | 1986 | HD1  | PHE | 126 | -2.429 | 13.507 | -0.127 | 0.00 | 0.00 | H |
| ATOM | 1987 | HD2  | PHE | 126 | -4.693 | 11.741 | 3.077  | 0.00 | 0.00 | H |
| ATOM | 1988 | HE1  | PHE | 126 | -1.829 | 11.241 | -0.949 | 0.00 | 0.00 | H |
| ATOM | 1989 | HE2  | PHE | 126 | -4.070 | 9.490  | 2.282  | 0.00 | 0.00 | H |
| ATOM | 1990 | HZ   | PHE | 126 | -2.638 | 9.226  | 0.258  | 0.00 | 0.00 | H |
| ATOM | 1991 | N    | GLU | 127 | -3.159 | 16.563 | 4.708  | 0.00 | 0.00 | N |
| ATOM | 1992 | CA   | GLU | 127 | -3.566 | 17.835 | 5.310  | 0.00 | 0.00 | C |
| ATOM | 1993 | C    | GLU | 127 | -2.615 | 18.998 | 4.970  | 0.00 | 0.00 | C |
| ATOM | 1994 | O    | GLU | 127 | -2.752 | 20.081 | 5.542  | 0.00 | 0.00 | O |
| ATOM | 1995 | CB   | GLU | 127 | -3.747 | 17.655 | 6.829  | 0.00 | 0.00 | C |
| ATOM | 1996 | CG   | GLU | 127 | -4.757 | 16.559 | 7.203  | 0.00 | 0.00 | C |
| ATOM | 1997 | CD   | GLU | 127 | -6.152 | 16.813 | 6.627  | 0.00 | 0.00 | C |
| ATOM | 1998 | OE1  | GLU | 127 | -6.446 | 16.233 | 5.558  | 0.00 | 0.00 | O |
| ATOM | 1999 | OE2  | GLU | 127 | -6.900 | 17.584 | 7.266  | 0.00 | 0.00 | O |
| ATOM | 2000 | H    | GLU | 127 | -2.696 | 15.902 | 5.315  | 0.00 | 0.00 | H |
| ATOM | 2001 | HA   | GLU | 127 | -4.538 | 18.100 | 4.892  | 0.00 | 0.00 | H |
| ATOM | 2002 | ZHB  | GLU | 127 | -2.783 | 17.407 | 7.274  | 0.00 | 0.00 | H |
| ATOM | 2003 | ZHB  | GLU | 127 | -4.091 | 18.595 | 7.262  | 0.00 | 0.00 | H |
| ATOM | 2004 | ZHG  | GLU | 127 | -4.827 | 16.505 | 8.290  | 0.00 | 0.00 | H |
| ATOM | 2005 | ZHG  | GLU | 127 | -4.389 | 15.597 | 6.846  | 0.00 | 0.00 | H |
| ATOM | 2006 | N    | SER | 128 | -1.666 | 18.786 | 4.044  | 0.00 | 0.00 | N |
| ATOM | 2007 | CA   | SER | 128 | -0.728 | 19.794 | 3.555  | 0.00 | 0.00 | C |
| ATOM | 2008 | C    | SER | 128 | -0.407 | 19.624 | 2.056  | 0.00 | 0.00 | C |
| ATOM | 2009 | O    | SER | 128 | 0.466  | 20.325 | 1.545  | 0.00 | 0.00 | O |
| ATOM | 2010 | CB   | SER | 128 | 0.538  | 19.782 | 4.427  | 0.00 | 0.00 | C |
| ATOM | 2011 | OG   | SER | 128 | 1.185  | 18.527 | 4.390  | 0.00 | 0.00 | O |
| ATOM | 2012 | H    | SER | 128 | -1.608 | 17.873 | 3.617  | 0.00 | 0.00 | H |
| ATOM | 2013 | HA   | SER | 128 | -1.195 | 20.773 | 3.663  | 0.00 | 0.00 | H |
| ATOM | 2014 | ZHB  | SER | 128 | 1.228  | 20.550 | 4.079  | 0.00 | 0.00 | H |
| ATOM | 2015 | ZHB  | SER | 128 | 0.264  | 20.006 | 5.459  | 0.00 | 0.00 | H |
| ATOM | 2016 | HG   | SER | 128 | 0.598  | 17.873 | 4.778  | 0.00 | 0.00 | H |
| ATOM | 2017 | N    | GLY | 129 | -1.104 | 18.712 | 1.354  | 0.00 | 0.00 | N |
| ATOM | 2018 | CA   | GLY | 129 | -0.939 | 18.468 | -0.075 | 0.00 | 0.00 | C |
| ATOM | 2019 | C    | GLY | 129 | -1.364 | 17.054 | -0.479 | 0.00 | 0.00 | C |
| ATOM | 2020 | O    | GLY | 129 | -1.871 | 16.283 | 0.336  | 0.00 | 0.00 | O |
| ATOM | 2021 | H    | GLY | 129 | -1.808 | 18.167 | 1.830  | 0.00 | 0.00 | H |
| ATOM | 2022 | ZHA  | GLY | 129 | -1.537 | 19.191 | -0.630 | 0.00 | 0.00 | H |
| ATOM | 2023 | ZHA  | GLY | 129 | 0.107  | 18.606 | -0.349 | 0.00 | 0.00 | H |
| ATOM | 2024 | N    | ILE | 130 | -1.133 | 16.720 | -1.755 | 0.00 | 0.00 | N |
| ATOM | 2025 | CA   | ILE | 130 | -1.282 | 15.372 | -2.296 | 0.00 | 0.00 | C |
| ATOM | 2026 | C    | ILE | 130 | -0.308 | 15.189 | -3.468 | 0.00 | 0.00 | C |
| ATOM | 2027 | O    | ILE | 130 | -0.201 | 16.044 | -4.348 | 0.00 | 0.00 | O |
| ATOM | 2028 | CB   | ILE | 130 | -2.757 | 15.054 | -2.656 | 0.00 | 0.00 | C |
| ATOM | 2029 | CG1  | ILE | 130 | -2.868 | 13.620 | -3.225 | 0.00 | 0.00 | C |
| ATOM | 2030 | CG2  | ILE | 130 | -3.386 | 16.095 | -3.603 | 0.00 | 0.00 | C |
| ATOM | 2031 | CD1  | ILE | 130 | -4.290 | 13.045 | -3.200 | 0.00 | 0.00 | C |
| ATOM | 2032 | H    | ILE | 130 | -0.736 | 17.414 | -2.372 | 0.00 | 0.00 | H |
| ATOM | 2033 | HA   | ILE | 130 | -0.981 | 14.673 | -1.513 | 0.00 | 0.00 | H |
| ATOM | 2034 | HB   | ILE | 130 | -3.326 | 15.083 | -1.727 | 0.00 | 0.00 | H |
| ATOM | 2035 | ZHG1 | ILE | 130 | -2.497 | 13.601 | -4.249 | 0.00 | 0.00 | H |
| ATOM | 2036 | ZHG1 | ILE | 130 | -2.238 | 12.955 | -2.633 | 0.00 | 0.00 | H |
| ATOM | 2037 | ZHG2 | ILE | 130 | -2.837 | 16.135 | -4.542 | 0.00 | 0.00 | H |
| ATOM | 2038 | ZHG2 | ILE | 130 | -4.425 | 15.841 | -3.809 | 0.00 | 0.00 | H |
| ATOM | 2039 | ZHG2 | ILE | 130 | -3.369 | 17.083 | -3.143 | 0.00 | 0.00 | H |
| ATOM | 2040 | 1HD1 | ILE | 130 | -4.269 | 12.021 | -3.574 | 0.00 | 0.00 | H |
| ATOM | 2041 | 2HD1 | ILE | 130 | -4.672 | 13.042 | -2.179 | 0.00 | 0.00 | H |
| ATOM | 2042 | 3HD1 | ILE | 130 | -4.952 | 13.634 | -3.833 | 0.00 | 0.00 | H |
| ATOM | 2043 | N    | ASN | 131 | 0.402  | 14.054 | -3.450 | 0.00 | 0.00 | N |
| ATOM | 2044 | CA   | ASN | 131 | 1.422  | 13.681 | -4.425 | 0.00 | 0.00 | C |
| ATOM | 2045 | C    | ASN | 131 | 1.549  | 12.153 | -4.506 | 0.00 | 0.00 | C |
| ATOM | 2046 | O    | ASN | 131 | 1.007  | 11.429 | -3.671 | 0.00 | 0.00 | O |
| ATOM | 2047 | CB   | ASN | 131 | 2.760  | 14.352 | -4.066 | 0.00 | 0.00 | C |
| ATOM | 2048 | CG   | ASN | 131 | 3.246  | 14.024 | -2.651 | 0.00 | 0.00 | C |
| ATOM | 2049 | ND2  | ASN | 131 | 3.015  | 14.929 | -1.698 | 0.00 | 0.00 | N |
| ATOM | 2050 | OD1  | ASN | 131 | 3.820  | 12.964 | -2.425 | 0.00 | 0.00 | O |
| ATOM | 2051 | H    | ASN | 131 | 0.247  | 13.403 | -2.695 | 0.00 | 0.00 | H |
| ATOM | 2052 | HA   | ASN | 131 | 1.121  | 14.045 | -5.407 | 0.00 | 0.00 | H |
| ATOM | 2053 | ZHB  | ASN | 131 | 3.521  | 14.045 | -4.784 | 0.00 | 0.00 | H |
| ATOM | 2054 | ZHB  | ASN | 131 | 2.647  | 15.433 | -4.162 | 0.00 | 0.00 | H |
| ATOM | 2055 | 1HD2 | ASN | 131 | 3.324  | 14.755 | -0.752 | 0.00 | 0.00 | H |
| ATOM | 2056 | 2HD2 | ASN | 131 | 2.537  | 15.790 | -1.923 | 0.00 | 0.00 | H |
| ATOM | 2057 | N    | TRP | 132 | 2.280  | 11.669 | -5.522 | 0.00 | 0.00 | N |
| ATOM | 2058 | CA   | TRP | 132 | 2.464  | 10.247 | -5.811 | 0.00 | 0.00 | C |
| ATOM | 2059 | C    | TRP | 132 | 3.309  | 9.525  | -4.746 | 0.00 | 0.00 | C |
| ATOM | 2060 | O    | TRP | 132 | 3.221  | 8.302  | -4.637 | 0.00 | 0.00 | O |
| ATOM | 2061 | CB   | TRP | 132 | 3.087  | 10.124 | -7.211 | 0.00 | 0.00 | C |
| ATOM | 2062 | CG   | TRP | 132 | 3.301  | 8.732  | -7.732 | 0.00 | 0.00 | C |
| ATOM | 2063 | CD1  | TRP | 132 | 4.492  | 8.217  | -8.107 | 0.00 | 0.00 | C |
| ATOM | 2064 | CD2  | TRP | 132 | 2.321  | 7.675  | -7.988 | 0.00 | 0.00 | C |
| ATOM | 2065 | CE2  | TRP | 132 | 3.012  | 6.533  | -8.495 | 0.00 | 0.00 | C |
| ATOM | 2066 | CE3  | TRP | 132 | 0.916  | 7.567  | -7.873 | 0.00 | 0.00 | C |
| ATOM | 2067 | NE1  | TRP | 132 | 4.335  | 6.918  | -8.532 | 0.00 | 0.00 | N |
| ATOM | 2068 | CZ2  | TRP | 132 | 2.349  | 5.355  | -8.865 | 0.00 | 0.00 | C |
| ATOM | 2069 | CZ3  | TRP | 132 | 0.239  | 6.396  | -8.265 | 0.00 | 0.00 | C |
| ATOM | 2070 | CH2  | TRP | 132 | 0.953  | 5.292  | -8.762 | 0.00 | 0.00 | C |

|      |      |      |     |     |        |        |        |      |      |   |
|------|------|------|-----|-----|--------|--------|--------|------|------|---|
| ATOM | 2071 | H    | TRP | 132 | 2.708  | 12.322 | -6.164 | 0.00 | 0.00 | H |
| ATOM | 2072 | HA   | TRP | 132 | 1.479  | 9.781  | -5.836 | 0.00 | 0.00 | H |
| ATOM | 2073 | 2HB  | TRP | 132 | 2.441  | 10.641 | -7.923 | 0.00 | 0.00 | H |
| ATOM | 2074 | 3HB  | TRP | 132 | 4.048  | 10.641 | -7.207 | 0.00 | 0.00 | H |
| ATOM | 2075 | HD1  | TRP | 132 | 5.434  | 8.744  | -8.074 | 0.00 | 0.00 | H |
| ATOM | 2076 | HE1  | TRP | 132 | 5.105  | 6.352  | -8.857 | 0.00 | 0.00 | H |
| ATOM | 2077 | HE3  | TRP | 132 | 0.347  | 8.405  | -7.500 | 0.00 | 0.00 | H |
| ATOM | 2078 | HZ2  | TRP | 132 | 2.907  | 4.518  | -9.253 | 0.00 | 0.00 | H |
| ATOM | 2079 | HZ3  | TRP | 132 | -0.837 | 6.346  | -8.192 | 0.00 | 0.00 | H |
| ATOM | 2080 | HH2  | TRP | 132 | 0.429  | 4.403  | -9.076 | 0.00 | 0.00 | H |
| ATOM | 2081 | N    | GLY | 133 | 4.090  | 10.262 | -3.940 | 0.00 | 0.00 | N |
| ATOM | 2082 | CA   | GLY | 133 | 4.824  | 9.720  | -2.804 | 0.00 | 0.00 | C |
| ATOM | 2083 | C    | GLY | 133 | 3.929  | 9.425  | -1.597 | 0.00 | 0.00 | C |
| ATOM | 2084 | O    | GLY | 133 | 4.264  | 8.539  | -0.817 | 0.00 | 0.00 | O |
| ATOM | 2085 | H    | GLY | 133 | 4.127  | 11.263 | -4.076 | 0.00 | 0.00 | H |
| ATOM | 2086 | 2HA  | GLY | 133 | 5.338  | 8.806  | -3.103 | 0.00 | 0.00 | H |
| ATOM | 2087 | 3HA  | GLY | 133 | 5.568  | 10.452 | -2.503 | 0.00 | 0.00 | H |
| ATOM | 2088 | N    | ARG | 134 | 2.791  | 10.127 | -1.459 | 0.00 | 0.00 | N |
| ATOM | 2089 | CA   | ARG | 134 | 1.793  | 9.884  | -0.418 | 0.00 | 0.00 | C |
| ATOM | 2090 | C    | ARG | 134 | 0.782  | 8.804  | -0.837 | 0.00 | 0.00 | C |
| ATOM | 2091 | O    | ARG | 134 | 0.128  | 8.231  | 0.033  | 0.00 | 0.00 | O |
| ATOM | 2092 | CB   | ARG | 134 | 1.069  | 11.194 | -0.061 | 0.00 | 0.00 | C |
| ATOM | 2093 | CG   | ARG | 134 | 1.993  | 12.198 | 0.640  | 0.00 | 0.00 | C |
| ATOM | 2094 | CD   | ARG | 134 | 1.253  | 13.486 | 1.005  | 0.00 | 0.00 | C |
| ATOM | 2095 | NE   | ARG | 134 | 2.171  | 14.434 | 1.652  | 0.00 | 0.00 | N |
| ATOM | 2096 | CZ   | ARG | 134 | 1.833  | 15.623 | 2.177  | 0.00 | 0.00 | C |
| ATOM | 2097 | NH1  | ARG | 134 | 0.566  | 16.058 | 2.184  | 0.00 | 0.00 | N |
| ATOM | 2098 | NH2  | ARG | 134 | 2.785  | 16.397 | 2.709  | 0.00 | 0.00 | N |
| ATOM | 2099 | H    | ARG | 134 | 2.578  | 10.844 | -2.138 | 0.00 | 0.00 | H |
| ATOM | 2100 | HA   | ARG | 134 | 2.301  | 9.529  | 0.480  | 0.00 | 0.00 | H |
| ATOM | 2101 | 2HB  | ARG | 134 | 0.657  | 11.645 | -0.965 | 0.00 | 0.00 | H |
| ATOM | 2102 | 3HB  | ARG | 134 | 0.249  | 10.964 | 0.618  | 0.00 | 0.00 | H |
| ATOM | 2103 | 2HG  | ARG | 134 | 2.381  | 11.746 | 1.551  | 0.00 | 0.00 | H |
| ATOM | 2104 | 3HG  | ARG | 134 | 2.824  | 12.448 | -0.015 | 0.00 | 0.00 | H |
| ATOM | 2105 | 2HD  | ARG | 134 | 0.848  | 13.940 | 0.100  | 0.00 | 0.00 | H |
| ATOM | 2106 | 3HD  | ARG | 134 | 0.433  | 13.249 | 1.682  | 0.00 | 0.00 | H |
| ATOM | 2107 | HE   | ARG | 134 | 3.145  | 14.167 | 1.682  | 0.00 | 0.00 | H |
| ATOM | 2108 | 1HH1 | ARG | 134 | -0.166 | 15.487 | 1.788  | 0.00 | 0.00 | H |
| ATOM | 2109 | 2HH1 | ARG | 134 | 0.344  | 16.959 | 2.581  | 0.00 | 0.00 | H |
| ATOM | 2110 | 1HH2 | ARG | 134 | 3.746  | 16.086 | 2.706  | 0.00 | 0.00 | H |
| ATOM | 2111 | 2HH2 | ARG | 134 | 2.545  | 17.294 | 3.105  | 0.00 | 0.00 | H |
| ATOM | 2112 | N    | VAL | 135 | 0.673  | 8.502  | -2.141 | 0.00 | 0.00 | N |
| ATOM | 2113 | CA   | VAL | 135 | -0.158 | 7.419  | -2.659 | 0.00 | 0.00 | C |
| ATOM | 2114 | C    | VAL | 135 | 0.507  | 6.066  | -2.367 | 0.00 | 0.00 | C |
| ATOM | 2115 | O    | VAL | 135 | -0.179 | 5.137  | -1.943 | 0.00 | 0.00 | O |
| ATOM | 2116 | CB   | VAL | 135 | -0.397 | 7.624  | -4.174 | 0.00 | 0.00 | C |
| ATOM | 2117 | CG1  | VAL | 135 | -1.032 | 6.386  | -4.828 | 0.00 | 0.00 | C |
| ATOM | 2118 | CG2  | VAL | 135 | -1.312 | 8.832  | -4.436 | 0.00 | 0.00 | C |
| ATOM | 2119 | H    | VAL | 135 | 1.234  | 9.010  | -2.809 | 0.00 | 0.00 | H |
| ATOM | 2120 | HA   | VAL | 135 | -1.125 | 7.441  | -2.153 | 0.00 | 0.00 | H |
| ATOM | 2121 | HB   | VAL | 135 | 0.561  | 7.805  | -4.664 | 0.00 | 0.00 | H |
| ATOM | 2122 | 1HG1 | VAL | 135 | -0.337 | 5.548  | -4.808 | 0.00 | 0.00 | H |
| ATOM | 2123 | 2HG1 | VAL | 135 | -1.948 | 6.112  | -4.303 | 0.00 | 0.00 | H |
| ATOM | 2124 | 3HG1 | VAL | 135 | -1.265 | 6.598  | -5.870 | 0.00 | 0.00 | H |
| ATOM | 2125 | 1HG2 | VAL | 135 | -2.296 | 8.650  | -4.007 | 0.00 | 0.00 | H |
| ATOM | 2126 | 2HG2 | VAL | 135 | -0.895 | 9.732  | -3.989 | 0.00 | 0.00 | H |
| ATOM | 2127 | 3HG2 | VAL | 135 | -1.415 | 8.994  | -5.510 | 0.00 | 0.00 | H |
| ATOM | 2128 | N    | VAL | 136 | 1.826  | 5.968  | -2.593 | 0.00 | 0.00 | N |
| ATOM | 2129 | CA   | VAL | 136 | 2.584  | 4.720  | -2.530 | 0.00 | 0.00 | C |
| ATOM | 2130 | C    | VAL | 136 | 3.166  | 4.489  | -1.121 | 0.00 | 0.00 | C |
| ATOM | 2131 | O    | VAL | 136 | 3.505  | 3.351  | -0.796 | 0.00 | 0.00 | O |
| ATOM | 2132 | CB   | VAL | 136 | 3.639  | 4.710  | -3.667 | 0.00 | 0.00 | C |
| ATOM | 2133 | CG1  | VAL | 136 | 4.455  | 3.405  | -3.717 | 0.00 | 0.00 | C |
| ATOM | 2134 | CG2  | VAL | 136 | 2.969  | 4.876  | -5.047 | 0.00 | 0.00 | C |
| ATOM | 2135 | H    | VAL | 136 | 2.324  | 6.784  | -2.921 | 0.00 | 0.00 | H |
| ATOM | 2136 | HA   | VAL | 136 | 1.894  | 3.897  | -2.729 | 0.00 | 0.00 | H |
| ATOM | 2137 | HB   | VAL | 136 | 4.327  | 5.541  | -3.509 | 0.00 | 0.00 | H |
| ATOM | 2138 | 1HG1 | VAL | 136 | 3.787  | 2.547  | -3.802 | 0.00 | 0.00 | H |
| ATOM | 2139 | 2HG1 | VAL | 136 | 5.129  | 3.417  | -4.574 | 0.00 | 0.00 | H |
| ATOM | 2140 | 3HG1 | VAL | 136 | 5.064  | 3.298  | -2.821 | 0.00 | 0.00 | H |
| ATOM | 2141 | 1HG2 | VAL | 136 | 3.717  | 4.818  | -5.839 | 0.00 | 0.00 | H |
| ATOM | 2142 | 2HG2 | VAL | 136 | 2.228  | 4.093  | -5.197 | 0.00 | 0.00 | H |
| ATOM | 2143 | 3HG2 | VAL | 136 | 2.473  | 5.843  | -5.126 | 0.00 | 0.00 | H |
| ATOM | 2144 | N    | ALA | 137 | 3.219  | 5.524  | -0.262 | 0.00 | 0.00 | N |
| ATOM | 2145 | CA   | ALA | 137 | 3.517  | 5.371  | 1.163  | 0.00 | 0.00 | C |
| ATOM | 2146 | C    | ALA | 137 | 2.290  | 4.860  | 1.927  | 0.00 | 0.00 | C |
| ATOM | 2147 | O    | ALA | 137 | 2.453  | 4.095  | 2.876  | 0.00 | 0.00 | O |
| ATOM | 2148 | CB   | ALA | 137 | 3.994  | 6.705  | 1.750  | 0.00 | 0.00 | C |
| ATOM | 2149 | H    | ALA | 137 | 2.935  | 6.439  | -0.577 | 0.00 | 0.00 | H |
| ATOM | 2150 | HA   | ALA | 137 | 4.325  | 4.648  | 1.279  | 0.00 | 0.00 | H |
| ATOM | 2151 | 1HB  | ALA | 137 | 4.175  | 6.591  | 2.819  | 0.00 | 0.00 | H |
| ATOM | 2152 | 2HB  | ALA | 137 | 4.925  | 7.010  | 1.274  | 0.00 | 0.00 | H |
| ATOM | 2153 | 3HB  | ALA | 137 | 3.235  | 7.474  | 1.600  | 0.00 | 0.00 | H |
| ATOM | 2154 | N    | LEU | 138 | 1.076  | 5.246  | 1.495  | 0.00 | 0.00 | N |
| ATOM | 2155 | CA   | LEU | 138 | -0.179 | 4.781  | 2.076  | 0.00 | 0.00 | C |
| ATOM | 2156 | C    | LEU | 138 | -0.488 | 3.344  | 1.647  | 0.00 | 0.00 | C |
| ATOM | 2157 | O    | LEU | 138 | -0.985 | 2.567  | 2.462  | 0.00 | 0.00 | O |
| ATOM | 2158 | CB   | LEU | 138 | -1.312 | 5.736  | 1.664  | 0.00 | 0.00 | C |
| ATOM | 2159 | CG   | LEU | 138 | -2.696 | 5.355  | 2.228  | 0.00 | 0.00 | C |
| ATOM | 2160 | CD1  | LEU | 138 | -2.712 | 5.314  | 3.762  | 0.00 | 0.00 | C |
| ATOM | 2161 | CD2  | LEU | 138 | -3.743 | 6.363  | 1.742  | 0.00 | 0.00 | C |
| ATOM | 2162 | H    | LEU | 138 | 1.013  | 5.872  | 0.705  | 0.00 | 0.00 | H |
| ATOM | 2163 | HA   | LEU | 138 | -0.074 | 4.810  | 3.161  | 0.00 | 0.00 | H |
| ATOM | 2164 | 2HB  | LEU | 138 | -1.058 | 6.738  | 2.007  | 0.00 | 0.00 | H |
| ATOM | 2165 | 3HB  | LEU | 138 | -1.372 | 5.757  | 0.574  | 0.00 | 0.00 | H |
| ATOM | 2166 | HG   | LEU | 138 | -2.982 | 4.373  | 1.849  | 0.00 | 0.00 | H |
| ATOM | 2167 | 1HD1 | LEU | 138 | -2.043 | 4.541  | 4.136  | 0.00 | 0.00 | H |
| ATOM | 2168 | 2HD1 | LEU | 138 | -2.408 | 6.280  | 4.168  | 0.00 | 0.00 | H |
| ATOM | 2169 | 3HD1 | LEU | 138 | -3.720 | 5.078  | 4.102  | 0.00 | 0.00 | H |
| ATOM | 2170 | 1HD2 | LEU | 138 | -4.733 | 6.057  | 2.077  | 0.00 | 0.00 | H |
| ATOM | 2171 | 2HD2 | LEU | 138 | -3.517 | 7.348  | 2.143  | 0.00 | 0.00 | H |
| ATOM | 2172 | 3HD2 | LEU | 138 | -3.736 | 6.408  | 0.655  | 0.00 | 0.00 | H |
| ATOM | 2173 | N    | LEU | 139 | -0.157 | 2.982  | 0.397  | 0.00 | 0.00 | N |
| ATOM | 2174 | CA   | LEU | 139 | -0.206 | 1.603  | -0.074 | 0.00 | 0.00 | C |
| ATOM | 2175 | C    | LEU | 139 | 0.890  | 0.774  | 0.615  | 0.00 | 0.00 | C |

|      |      |      |     |     |        |        |        |      |      |   |
|------|------|------|-----|-----|--------|--------|--------|------|------|---|
| ATOM | 2176 | O    | LEU | 139 | 0.696  | -0.420 | 0.835  | 0.00 | 0.00 | O |
| ATOM | 2177 | CB   | LEU | 139 | -0.026 | 1.580  | -1.605 | 0.00 | 0.00 | C |
| ATOM | 2178 | CG   | LEU | 139 | -0.657 | 0.333  | -2.260 | 0.00 | 0.00 | C |
| ATOM | 2179 | CD1  | LEU | 139 | -2.168 | 0.531  | -2.463 | 0.00 | 0.00 | C |
| ATOM | 2180 | CD2  | LEU | 139 | -0.010 | 0.042  | -3.620 | 0.00 | 0.00 | C |
| ATOM | 2181 | H    | LEU | 139 | 0.238  | 3.670  | -0.227 | 0.00 | 0.00 | H |
| ATOM | 2182 | HA   | LEU | 139 | -1.184 | 1.191  | 0.183  | 0.00 | 0.00 | H |
| ATOM | 2183 | ZHB  | LEU | 139 | -0.482 | 2.467  | -2.047 | 0.00 | 0.00 | H |
| ATOM | 2184 | 3HB  | LEU | 139 | 1.042  | 1.617  | -1.828 | 0.00 | 0.00 | H |
| ATOM | 2185 | HG   | LEU | 139 | -0.496 | -0.536 | -1.621 | 0.00 | 0.00 | H |
| ATOM | 2186 | 1HD1 | LEU | 139 | -2.352 | 1.384  | -3.117 | 0.00 | 0.00 | H |
| ATOM | 2187 | 2HD1 | LEU | 139 | -2.655 | 0.712  | -1.506 | 0.00 | 0.00 | H |
| ATOM | 2188 | 3HD1 | LEU | 139 | -2.599 | -0.359 | -2.921 | 0.00 | 0.00 | H |
| ATOM | 2189 | 1HD2 | LEU | 139 | 1.061  | -0.116 | -3.493 | 0.00 | 0.00 | H |
| ATOM | 2190 | 2HD2 | LEU | 139 | -0.445 | -0.862 | -4.048 | 0.00 | 0.00 | H |
| ATOM | 2191 | 3HD2 | LEU | 139 | -0.178 | 0.878  | -4.299 | 0.00 | 0.00 | H |
| ATOM | 2192 | N    | GLY | 140 | 2.012  | 1.423  | 0.972  | 0.00 | 0.00 | N |
| ATOM | 2193 | CA   | GLY | 140 | 3.198  | 0.832  | 1.571  | 0.00 | 0.00 | C |
| ATOM | 2194 | C    | GLY | 140 | 2.947  | 0.287  | 2.976  | 0.00 | 0.00 | C |
| ATOM | 2195 | O    | GLY | 140 | 3.367  | -0.833 | 3.265  | 0.00 | 0.00 | O |
| ATOM | 2196 | H    | GLY | 140 | 2.069  | 2.412  | 0.769  | 0.00 | 0.00 | H |
| ATOM | 2197 | ZHA  | GLY | 140 | 3.575  | 0.042  | 0.929  | 0.00 | 0.00 | H |
| ATOM | 2198 | 3HA  | GLY | 140 | 3.959  | 1.609  | 1.632  | 0.00 | 0.00 | H |
| ATOM | 2199 | N    | PHE | 141 | 2.226  | 1.047  | 3.815  | 0.00 | 0.00 | N |
| ATOM | 2200 | CA   | PHE | 141 | 1.783  | 0.599  | 5.132  | 0.00 | 0.00 | C |
| ATOM | 2201 | C    | PHE | 141 | 0.424  | -0.123 | 5.068  | 0.00 | 0.00 | C |
| ATOM | 2202 | O    | PHE | 141 | 0.052  | -0.792 | 6.031  | 0.00 | 0.00 | O |
| ATOM | 2203 | CB   | PHE | 141 | 1.768  | 1.784  | 6.111  | 0.00 | 0.00 | C |
| ATOM | 2204 | CG   | PHE | 141 | 1.413  | 1.371  | 7.530  | 0.00 | 0.00 | C |
| ATOM | 2205 | CD1  | PHE | 141 | 2.288  | 0.542  | 8.258  | 0.00 | 0.00 | C |
| ATOM | 2206 | CD2  | PHE | 141 | 0.167  | 1.719  | 8.086  | 0.00 | 0.00 | C |
| ATOM | 2207 | CE1  | PHE | 141 | 1.911  | 0.050  | 9.518  | 0.00 | 0.00 | C |
| ATOM | 2208 | CE2  | PHE | 141 | -0.206 | 1.231  | 9.351  | 0.00 | 0.00 | C |
| ATOM | 2209 | CZ   | PHE | 141 | 0.664  | 0.392  | 10.067 | 0.00 | 0.00 | C |
| ATOM | 2210 | H    | PHE | 141 | 1.914  | 1.957  | 3.508  | 0.00 | 0.00 | H |
| ATOM | 2211 | HA   | PHE | 141 | 2.515  | -0.118 | 5.507  | 0.00 | 0.00 | H |
| ATOM | 2212 | ZHB  | PHE | 141 | 2.756  | 2.247  | 6.124  | 0.00 | 0.00 | H |
| ATOM | 2213 | 3HB  | PHE | 141 | 1.054  | 2.530  | 5.757  | 0.00 | 0.00 | H |
| ATOM | 2214 | HD1  | PHE | 141 | 3.240  | 0.259  | 7.838  | 0.00 | 0.00 | H |
| ATOM | 2215 | HD2  | PHE | 141 | -0.517 | 2.343  | 7.529  | 0.00 | 0.00 | H |
| ATOM | 2216 | HE1  | PHE | 141 | 2.583  | -0.592 | 10.066 | 0.00 | 0.00 | H |
| ATOM | 2217 | HE2  | PHE | 141 | -1.166 | 1.493  | 9.771  | 0.00 | 0.00 | H |
| ATOM | 2218 | HZ   | PHE | 141 | 0.377  | 0.015  | 11.037 | 0.00 | 0.00 | H |
| ATOM | 2219 | N    | GLY | 142 | -0.299 | -0.030 | 3.940  | 0.00 | 0.00 | N |
| ATOM | 2220 | CA   | GLY | 142 | -1.512 | -0.801 | 3.692  | 0.00 | 0.00 | C |
| ATOM | 2221 | C    | GLY | 142 | -1.208 | -2.292 | 3.507  | 0.00 | 0.00 | C |
| ATOM | 2222 | O    | GLY | 142 | -2.011 | -3.127 | 3.916  | 0.00 | 0.00 | O |
| ATOM | 2223 | H    | GLY | 142 | 0.046  | 0.539  | 3.182  | 0.00 | 0.00 | H |
| ATOM | 2224 | ZHA  | GLY | 142 | -2.207 | -0.670 | 4.523  | 0.00 | 0.00 | H |
| ATOM | 2225 | 3HA  | GLY | 142 | -1.976 | -0.420 | 2.782  | 0.00 | 0.00 | H |
| ATOM | 2226 | N    | TYR | 143 | -0.026 | -2.616 | 2.961  | 0.00 | 0.00 | N |
| ATOM | 2227 | CA   | TYR | 143 | 0.501  | -3.972 | 2.853  | 0.00 | 0.00 | C |
| ATOM | 2228 | C    | TYR | 143 | 0.956  | -4.514 | 4.212  | 0.00 | 0.00 | C |
| ATOM | 2229 | O    | TYR | 143 | 0.847  | -5.717 | 4.437  | 0.00 | 0.00 | O |
| ATOM | 2230 | CB   | TYR | 143 | 1.671  | -3.959 | 1.859  | 0.00 | 0.00 | C |
| ATOM | 2231 | CG   | TYR | 143 | 2.561  | -5.189 | 1.882  | 0.00 | 0.00 | C |
| ATOM | 2232 | CD1  | TYR | 143 | 2.023  | -6.459 | 1.601  | 0.00 | 0.00 | C |
| ATOM | 2233 | CD2  | TYR | 143 | 3.924  | -5.068 | 2.219  | 0.00 | 0.00 | C |
| ATOM | 2234 | CE1  | TYR | 143 | 2.833  | -7.606 | 1.649  | 0.00 | 0.00 | C |
| ATOM | 2235 | CE2  | TYR | 143 | 4.741  | -6.209 | 2.267  | 0.00 | 0.00 | C |
| ATOM | 2236 | CZ   | TYR | 143 | 4.201  | -7.484 | 1.984  | 0.00 | 0.00 | C |
| ATOM | 2237 | OH   | TYR | 143 | 4.998  | -8.589 | 2.036  | 0.00 | 0.00 | O |
| ATOM | 2238 | H    | TYR | 143 | 0.583  | -1.871 | 2.653  | 0.00 | 0.00 | H |
| ATOM | 2239 | HA   | TYR | 143 | -0.278 | -4.626 | 2.460  | 0.00 | 0.00 | H |
| ATOM | 2240 | ZHB  | TYR | 143 | 1.265  | -3.845 | 0.855  | 0.00 | 0.00 | H |
| ATOM | 2241 | 3HB  | TYR | 143 | 2.292  | -3.088 | 2.073  | 0.00 | 0.00 | H |
| ATOM | 2242 | HD1  | TYR | 143 | 0.978  | -6.554 | 1.360  | 0.00 | 0.00 | H |
| ATOM | 2243 | HD2  | TYR | 143 | 4.347  | -4.100 | 2.440  | 0.00 | 0.00 | H |
| ATOM | 2244 | HE1  | TYR | 143 | 2.409  | -8.576 | 1.436  | 0.00 | 0.00 | H |
| ATOM | 2245 | HE2  | TYR | 143 | 5.785  | -6.107 | 2.511  | 0.00 | 0.00 | H |
| ATOM | 2246 | HH   | TYR | 143 | 5.908  | -8.382 | 2.264  | 0.00 | 0.00 | H |
| ATOM | 2247 | N    | ARG | 144 | 1.446  | -3.650 | 5.114  | 0.00 | 0.00 | N |
| ATOM | 2248 | CA   | ARG | 144 | 1.900  | -4.052 | 6.442  | 0.00 | 0.00 | C |
| ATOM | 2249 | C    | ARG | 144 | 0.726  | -4.208 | 7.416  | 0.00 | 0.00 | C |
| ATOM | 2250 | O    | ARG | 144 | 0.833  | -5.000 | 8.349  | 0.00 | 0.00 | O |
| ATOM | 2251 | CB   | ARG | 144 | 2.958  | -3.061 | 6.954  | 0.00 | 0.00 | C |
| ATOM | 2252 | CG   | ARG | 144 | 4.225  | -2.991 | 6.082  | 0.00 | 0.00 | C |
| ATOM | 2253 | CD   | ARG | 144 | 4.935  | -4.343 | 5.925  | 0.00 | 0.00 | C |
| ATOM | 2254 | NE   | ARG | 144 | 6.141  | -4.210 | 5.100  | 0.00 | 0.00 | N |
| ATOM | 2255 | CZ   | ARG | 144 | 6.991  | -5.202 | 4.780  | 0.00 | 0.00 | C |
| ATOM | 2256 | NH1  | ARG | 144 | 6.826  | -6.449 | 5.243  | 0.00 | 0.00 | N |
| ATOM | 2257 | NH2  | ARG | 144 | 8.023  | -4.938 | 3.971  | 0.00 | 0.00 | N |
| ATOM | 2258 | H    | ARG | 144 | 1.508  | -2.670 | 4.877  | 0.00 | 0.00 | H |
| ATOM | 2259 | HA   | ARG | 144 | 2.368  | -5.032 | 6.363  | 0.00 | 0.00 | H |
| ATOM | 2260 | ZHB  | ARG | 144 | 2.514  | -2.067 | 7.010  | 0.00 | 0.00 | H |
| ATOM | 2261 | 3HB  | ARG | 144 | 3.254  | -3.350 | 7.960  | 0.00 | 0.00 | H |
| ATOM | 2262 | ZHG  | ARG | 144 | 3.963  | -2.615 | 5.094  | 0.00 | 0.00 | H |
| ATOM | 2263 | 3HG  | ARG | 144 | 4.917  | -2.283 | 6.539  | 0.00 | 0.00 | H |
| ATOM | 2264 | ZHD  | ARG | 144 | 5.207  | -4.722 | 6.910  | 0.00 | 0.00 | H |
| ATOM | 2265 | 3HD  | ARG | 144 | 4.268  | -5.056 | 5.439  | 0.00 | 0.00 | H |
| ATOM | 2266 | HE   | ARG | 144 | 6.331  | -3.290 | 4.730  | 0.00 | 0.00 | H |
| ATOM | 2267 | 1HH1 | ARG | 144 | 6.049  | -6.664 | 5.851  | 0.00 | 0.00 | H |
| ATOM | 2268 | 2HH1 | ARG | 144 | 7.480  | -7.174 | 4.981  | 0.00 | 0.00 | H |
| ATOM | 2269 | 1HH2 | ARG | 144 | 8.165  | -3.999 | 3.624  | 0.00 | 0.00 | H |
| ATOM | 2270 | 2HH2 | ARG | 144 | 8.660  | -5.673 | 3.720  | 0.00 | 0.00 | H |
| ATOM | 2271 | N    | LEU | 145 | -0.403 | -3.526 | 7.165  | 0.00 | 0.00 | N |
| ATOM | 2272 | CA   | LEU | 145 | -1.680 | -3.755 | 7.833  | 0.00 | 0.00 | C |
| ATOM | 2273 | C    | LEU | 145 | -2.279 | -5.096 | 7.379  | 0.00 | 0.00 | C |
| ATOM | 2274 | O    | LEU | 145 | -2.863 | -5.806 | 8.197  | 0.00 | 0.00 | O |
| ATOM | 2275 | CB   | LEU | 145 | -2.613 | -2.574 | 7.500  | 0.00 | 0.00 | C |
| ATOM | 2276 | CG   | LEU | 145 | -4.074 | -2.722 | 7.979  | 0.00 | 0.00 | C |
| ATOM | 2277 | CD1  | LEU | 145 | -4.189 | -2.834 | 9.503  | 0.00 | 0.00 | C |
| ATOM | 2278 | CD2  | LEU | 145 | -4.900 | -1.521 | 7.500  | 0.00 | 0.00 | C |
| ATOM | 2279 | H    | LEU | 145 | -0.413 | -2.885 | 6.384  | 0.00 | 0.00 | H |
| ATOM | 2280 | HA   | LEU | 145 | -1.516 | -3.785 | 8.911  | 0.00 | 0.00 | H |

|      |      |      |     |     |        |         |        |      |      |   |
|------|------|------|-----|-----|--------|---------|--------|------|------|---|
| ATOM | 2281 | ZHB  | LEU | 145 | -2.188 | -1.665  | 7.933  | 0.00 | 0.00 | H |
| ATOM | 2282 | 3HB  | LEU | 145 | -2.629 | -2.445  | 6.418  | 0.00 | 0.00 | H |
| ATOM | 2283 | HG   | LEU | 145 | -4.510 | -3.618  | 7.541  | 0.00 | 0.00 | H |
| ATOM | 2284 | 1HD1 | LEU | 145 | -3.721 | -1.972  | 9.979  | 0.00 | 0.00 | H |
| ATOM | 2285 | 2HD1 | LEU | 145 | -5.242 | -2.873  | 9.783  | 0.00 | 0.00 | H |
| ATOM | 2286 | 3HD1 | LEU | 145 | -3.708 | -3.747  | 9.848  | 0.00 | 0.00 | H |
| ATOM | 2287 | 1HD2 | LEU | 145 | -4.543 | -0.618  | 7.988  | 0.00 | 0.00 | H |
| ATOM | 2288 | 2HD2 | LEU | 145 | -4.808 | -1.406  | 6.420  | 0.00 | 0.00 | H |
| ATOM | 2289 | 3HD2 | LEU | 145 | -5.950 | -1.671  | 7.751  | 0.00 | 0.00 | H |
| ATOM | 2290 | N    | ALA | 146 | -2.108 | -5.447  | 6.095  | 0.00 | 0.00 | N |
| ATOM | 2291 | CA   | ALA | 146 | -2.603 | -6.683  | 5.503  | 0.00 | 0.00 | C |
| ATOM | 2292 | C    | ALA | 146 | -1.759 | -7.897  | 5.908  | 0.00 | 0.00 | C |
| ATOM | 2293 | O    | ALA | 146 | -2.285 | -9.006  | 5.937  | 0.00 | 0.00 | O |
| ATOM | 2294 | CB   | ALA | 146 | -2.631 | -6.517  | 3.981  | 0.00 | 0.00 | C |
| ATOM | 2295 | H    | ALA | 146 | -1.609 | -4.817  | 5.482  | 0.00 | 0.00 | H |
| ATOM | 2296 | HA   | ALA | 146 | -3.626 | -6.845  | 5.842  | 0.00 | 0.00 | H |
| ATOM | 2297 | 1HB  | ALA | 146 | -3.261 | -5.670  | 3.722  | 0.00 | 0.00 | H |
| ATOM | 2298 | 2HB  | ALA | 146 | -1.625 | -6.350  | 3.598  | 0.00 | 0.00 | H |
| ATOM | 2299 | 3HB  | ALA | 146 | -3.045 | -7.406  | 3.512  | 0.00 | 0.00 | H |
| ATOM | 2300 | N    | LEU | 147 | -0.478 | -7.689  | 6.248  | 0.00 | 0.00 | N |
| ATOM | 2301 | CA   | LEU | 147 | 0.453  | -8.731  | 6.669  | 0.00 | 0.00 | C |
| ATOM | 2302 | C    | LEU | 147 | 0.392  | -8.954  | 8.188  | 0.00 | 0.00 | C |
| ATOM | 2303 | O    | LEU | 147 | 0.714  | -10.047 | 8.649  | 0.00 | 0.00 | O |
| ATOM | 2304 | CB   | LEU | 147 | 1.861  | -8.334  | 6.186  | 0.00 | 0.00 | C |
| ATOM | 2305 | CG   | LEU | 147 | 2.972  | -9.375  | 6.428  | 0.00 | 0.00 | C |
| ATOM | 2306 | CD1  | LEU | 147 | 2.698  | -10.713 | 5.718  | 0.00 | 0.00 | C |
| ATOM | 2307 | CD2  | LEU | 147 | 4.311  | -8.803  | 5.942  | 0.00 | 0.00 | C |
| ATOM | 2308 | H    | LEU | 147 | -0.114 | -6.748  | 6.208  | 0.00 | 0.00 | H |
| ATOM | 2309 | HA   | LEU | 147 | 0.169  | -9.657  | 6.170  | 0.00 | 0.00 | H |
| ATOM | 2310 | 2HB  | LEU | 147 | 1.812  | -8.137  | 5.113  | 0.00 | 0.00 | H |
| ATOM | 2311 | 3HB  | LEU | 147 | 2.141  | -7.404  | 6.683  | 0.00 | 0.00 | H |
| ATOM | 2312 | HG   | LEU | 147 | 3.060  | -9.560  | 7.497  | 0.00 | 0.00 | H |
| ATOM | 2313 | 1HD1 | LEU | 147 | 3.543  | -11.388 | 5.861  | 0.00 | 0.00 | H |
| ATOM | 2314 | 2HD1 | LEU | 147 | 1.811  | -11.188 | 6.135  | 0.00 | 0.00 | H |
| ATOM | 2315 | 3HD1 | LEU | 147 | 2.551  | -10.548 | 4.649  | 0.00 | 0.00 | H |
| ATOM | 2316 | 1HD2 | LEU | 147 | 4.529  | -7.876  | 6.475  | 0.00 | 0.00 | H |
| ATOM | 2317 | 2HD2 | LEU | 147 | 4.268  | -8.598  | 4.872  | 0.00 | 0.00 | H |
| ATOM | 2318 | 3HD2 | LEU | 147 | 5.114  | -9.514  | 6.139  | 0.00 | 0.00 | H |
| ATOM | 2319 | N    | HIP | 148 | -0.052 | -7.949  | 8.960  | 0.00 | 0.00 | N |
| ATOM | 2320 | CA   | HIP | 148 | -0.213 | -8.030  | 10.409 | 0.00 | 0.00 | C |
| ATOM | 2321 | C    | HIP | 148 | -1.381 | -8.948  | 10.782 | 0.00 | 0.00 | C |
| ATOM | 2322 | O    | HIP | 148 | -1.254 | -9.728  | 11.725 | 0.00 | 0.00 | O |
| ATOM | 2323 | CB   | HIP | 148 | -0.417 | -6.608  | 10.947 | 0.00 | 0.00 | C |
| ATOM | 2324 | CG   | HIP | 148 | -0.552 | -6.494  | 12.445 | 0.00 | 0.00 | C |
| ATOM | 2325 | CD2  | HIP | 148 | -1.720 | -6.312  | 13.136 | 0.00 | 0.00 | C |
| ATOM | 2326 | ND1  | HIP | 148 | 0.491  | -6.389  | 13.347 | 0.00 | 0.00 | N |
| ATOM | 2327 | CE1  | HIP | 148 | -0.034 | -6.143  | 14.561 | 0.00 | 0.00 | C |
| ATOM | 2328 | NE2  | HIP | 148 | -1.374 | -6.094  | 14.455 | 0.00 | 0.00 | N |
| ATOM | 2329 | H    | HIP | 148 | -0.310 | -7.077  | 8.521  | 0.00 | 0.00 | H |
| ATOM | 2330 | HA   | HIP | 148 | 0.705  | -8.433  | 10.840 | 0.00 | 0.00 | H |
| ATOM | 2331 | ZHB  | HIP | 148 | 0.444  | -6.011  | 10.655 | 0.00 | 0.00 | H |
| ATOM | 2332 | 3HB  | HIP | 148 | -1.301 | -6.169  | 10.483 | 0.00 | 0.00 | H |
| ATOM | 2333 | HD1  | HIP | 148 | 1.474  | -6.442  | 13.126 | 0.00 | 0.00 | H |
| ATOM | 2334 | HD2  | HIP | 148 | -2.716 | -6.281  | 12.720 | 0.00 | 0.00 | H |
| ATOM | 2335 | HE1  | HIP | 148 | 0.530  | -5.983  | 15.469 | 0.00 | 0.00 | H |
| ATOM | 2336 | HE2  | HIP | 148 | -2.020 | -5.897  | 15.208 | 0.00 | 0.00 | H |
| ATOM | 2337 | N    | VAL | 149 | -2.483 | -8.891  | 10.016 | 0.00 | 0.00 | N |
| ATOM | 2338 | CA   | VAL | 149 | -3.653 | -9.749  | 10.193 | 0.00 | 0.00 | C |
| ATOM | 2339 | C    | VAL | 149 | -3.420 | -11.144 | 9.593  | 0.00 | 0.00 | C |
| ATOM | 2340 | O    | VAL | 149 | -3.977 | -12.114 | 10.100 | 0.00 | 0.00 | O |
| ATOM | 2341 | CB   | VAL | 149 | -4.920 | -9.075  | 9.617  | 0.00 | 0.00 | C |
| ATOM | 2342 | CG1  | VAL | 149 | -5.224 | -7.751  | 10.339 | 0.00 | 0.00 | C |
| ATOM | 2343 | CG2  | VAL | 149 | -4.843 | -8.839  | 8.098  | 0.00 | 0.00 | C |
| ATOM | 2344 | H    | VAL | 149 | -2.512 | -8.232  | 9.252  | 0.00 | 0.00 | H |
| ATOM | 2345 | HA   | VAL | 149 | -3.815 | -9.879  | 11.265 | 0.00 | 0.00 | H |
| ATOM | 2346 | HB   | VAL | 149 | -5.765 | -9.741  | 9.802  | 0.00 | 0.00 | H |
| ATOM | 2347 | 1HG1 | VAL | 149 | -4.434 | -7.022  | 10.157 | 0.00 | 0.00 | H |
| ATOM | 2348 | 2HG1 | VAL | 149 | -6.167 | -7.342  | 9.978  | 0.00 | 0.00 | H |
| ATOM | 2349 | 3HG1 | VAL | 149 | -5.306 | -7.927  | 11.413 | 0.00 | 0.00 | H |
| ATOM | 2350 | 1HG2 | VAL | 149 | -4.747 | -9.789  | 7.571  | 0.00 | 0.00 | H |
| ATOM | 2351 | 2HG2 | VAL | 149 | -5.749 | -8.349  | 7.749  | 0.00 | 0.00 | H |
| ATOM | 2352 | 3HG2 | VAL | 149 | -3.993 | -8.204  | 7.858  | 0.00 | 0.00 | H |
| ATOM | 2353 | N    | TYR | 150 | -2.572 | -11.260 | 8.558  | 0.00 | 0.00 | N |
| ATOM | 2354 | CA   | TYR | 150 | -2.218 | -12.533 | 7.934  | 0.00 | 0.00 | C |
| ATOM | 2355 | C    | TYR | 150 | -1.365 | -13.400 | 8.872  | 0.00 | 0.00 | C |
| ATOM | 2356 | O    | TYR | 150 | -1.453 | -14.626 | 8.818  | 0.00 | 0.00 | O |
| ATOM | 2357 | CB   | TYR | 150 | -1.464 | -12.234 | 6.633  | 0.00 | 0.00 | C |
| ATOM | 2358 | CG   | TYR | 150 | -1.239 | -13.435 | 5.740  | 0.00 | 0.00 | C |
| ATOM | 2359 | CD1  | TYR | 150 | -0.012 | -14.127 | 5.761  | 0.00 | 0.00 | C |
| ATOM | 2360 | CD2  | TYR | 150 | -2.268 | -13.852 | 4.876  | 0.00 | 0.00 | C |
| ATOM | 2361 | CE1  | TYR | 150 | 0.182  | -15.240 | 4.924  | 0.00 | 0.00 | C |
| ATOM | 2362 | CE2  | TYR | 150 | -2.081 | -14.960 | 4.037  | 0.00 | 0.00 | C |
| ATOM | 2363 | CZ   | TYR | 150 | -0.855 | -15.661 | 4.059  | 0.00 | 0.00 | C |
| ATOM | 2364 | OH   | TYR | 150 | -0.679 | -16.740 | 3.248  | 0.00 | 0.00 | O |
| ATOM | 2365 | H    | TYR | 150 | -2.135 | -10.429 | 8.187  | 0.00 | 0.00 | H |
| ATOM | 2366 | HA   | TYR | 150 | -3.137 | -13.067 | 7.691  | 0.00 | 0.00 | H |
| ATOM | 2367 | ZHB  | TYR | 150 | -2.041 | -11.510 | 6.063  | 0.00 | 0.00 | H |
| ATOM | 2368 | 3HB  | TYR | 150 | -0.503 | -11.780 | 6.872  | 0.00 | 0.00 | H |
| ATOM | 2369 | HD1  | TYR | 150 | 0.780  | -13.810 | 6.422  | 0.00 | 0.00 | H |
| ATOM | 2370 | HD2  | TYR | 150 | -3.209 | -13.324 | 4.860  | 0.00 | 0.00 | H |
| ATOM | 2371 | HE1  | TYR | 150 | 1.123  | -15.772 | 4.944  | 0.00 | 0.00 | H |
| ATOM | 2372 | HE2  | TYR | 150 | -2.877 | -15.277 | 3.382  | 0.00 | 0.00 | H |
| ATOM | 2373 | HH   | TYR | 150 | 0.182  | -17.151 | 3.350  | 0.00 | 0.00 | H |
| ATOM | 2374 | N    | GLN | 151 | -0.580 | -12.754 | 9.747  | 0.00 | 0.00 | N |
| ATOM | 2375 | CA   | GLN | 151 | 0.251  | -13.380 | 10.770 | 0.00 | 0.00 | C |
| ATOM | 2376 | C    | GLN | 151 | -0.536 | -13.667 | 12.063 | 0.00 | 0.00 | C |
| ATOM | 2377 | O    | GLN | 151 | -0.014 | -14.355 | 12.939 | 0.00 | 0.00 | O |
| ATOM | 2378 | CB   | GLN | 151 | 1.472  | -12.479 | 11.024 | 0.00 | 0.00 | C |
| ATOM | 2379 | CG   | GLN | 151 | 2.463  | -12.527 | 9.844  | 0.00 | 0.00 | C |
| ATOM | 2380 | CD   | GLN | 151 | 3.585  | -11.486 | 9.930  | 0.00 | 0.00 | C |
| ATOM | 2381 | NE2  | GLN | 151 | 4.541  | -11.570 | 9.003  | 0.00 | 0.00 | N |
| ATOM | 2382 | OE1  | GLN | 151 | 3.593  | -10.615 | 10.799 | 0.00 | 0.00 | O |
| ATOM | 2383 | H    | GLN | 151 | -0.570 | -11.744 | 9.721  | 0.00 | 0.00 | H |
| ATOM | 2384 | HA   | GLN | 151 | 0.611  | -14.337 | 10.390 | 0.00 | 0.00 | H |
| ATOM | 2385 | ZHB  | GLN | 151 | 1.129  | -11.456 | 11.187 | 0.00 | 0.00 | H |

|      |      |      |     |     |         |         |        |      |      |   |
|------|------|------|-----|-----|---------|---------|--------|------|------|---|
| ATOM | 2386 | 3HB  | GLN | 151 | 1.994   | -12.815 | 11.922 | 0.00 | 0.00 | H |
| ATOM | 2387 | ZHG  | GLN | 151 | 2.910   | -13.522 | 9.806  | 0.00 | 0.00 | H |
| ATOM | 2388 | 3HG  | GLN | 151 | 1.933   | -12.374 | 8.904  | 0.00 | 0.00 | H |
| ATOM | 2389 | 1HE2 | GLN | 151 | 5.306   | -10.910 | 9.005  | 0.00 | 0.00 | H |
| ATOM | 2390 | 2HE2 | GLN | 151 | 4.502   | -12.296 | 8.301  | 0.00 | 0.00 | H |
| ATOM | 2391 | N    | HIP | 152 | -1.789  | -13.191 | 12.164 | 0.00 | 0.00 | N |
| ATOM | 2392 | CA   | HIP | 152 | -2.751  | -13.587 | 13.195 | 0.00 | 0.00 | C |
| ATOM | 2393 | C    | HIP | 152 | -3.616  | -14.781 | 12.746 | 0.00 | 0.00 | C |
| ATOM | 2394 | O    | HIP | 152 | -4.551  | -15.152 | 13.456 | 0.00 | 0.00 | O |
| ATOM | 2395 | CB   | HIP | 152 | -3.616  | -12.380 | 13.597 | 0.00 | 0.00 | C |
| ATOM | 2396 | CG   | HIP | 152 | -2.850  | -11.206 | 14.155 | 0.00 | 0.00 | C |
| ATOM | 2397 | CD2  | HIP | 152 | -3.279  | -9.907  | 14.168 | 0.00 | 0.00 | C |
| ATOM | 2398 | ND1  | HIP | 152 | -1.611  | -11.243 | 14.773 | 0.00 | 0.00 | N |
| ATOM | 2399 | CE1  | HIP | 152 | -1.295  | -9.989  | 15.145 | 0.00 | 0.00 | C |
| ATOM | 2400 | NE2  | HIP | 152 | -2.296  | -9.165  | 14.789 | 0.00 | 0.00 | N |
| ATOM | 2401 | H    | HIP | 152 | -2.147  | -12.616 | 11.415 | 0.00 | 0.00 | H |
| ATOM | 2402 | HA   | HIP | 152 | -2.199  | -13.906 | 14.081 | 0.00 | 0.00 | H |
| ATOM | 2403 | ZHB  | HIP | 152 | -4.186  | -12.044 | 12.732 | 0.00 | 0.00 | H |
| ATOM | 2404 | 3HB  | HIP | 152 | -4.329  | -12.695 | 14.361 | 0.00 | 0.00 | H |
| ATOM | 2405 | HD1  | HIP | 152 | -1.044  | -12.066 | 14.915 | 0.00 | 0.00 | H |
| ATOM | 2406 | HD2  | HIP | 152 | -4.214  | -9.534  | 13.773 | 0.00 | 0.00 | H |
| ATOM | 2407 | HE1  | HIP | 152 | -0.387  | -9.694  | 15.650 | 0.00 | 0.00 | H |
| ATOM | 2408 | HE2  | HIP | 152 | -2.325  | -8.169  | 14.951 | 0.00 | 0.00 | H |
| ATOM | 2409 | N    | GLY | 153 | -3.321  | -15.375 | 11.576 | 0.00 | 0.00 | N |
| ATOM | 2410 | CA   | GLY | 153 | -4.087  | -16.469 | 10.987 | 0.00 | 0.00 | C |
| ATOM | 2411 | C    | GLY | 153 | -5.388  | -16.014 | 10.312 | 0.00 | 0.00 | C |
| ATOM | 2412 | O    | GLY | 153 | -6.183  | -16.867 | 9.920  | 0.00 | 0.00 | O |
| ATOM | 2413 | H    | GLY | 153 | -2.538  | -15.030 | 11.039 | 0.00 | 0.00 | H |
| ATOM | 2414 | ZHA  | GLY | 153 | -3.461  | -16.951 | 10.236 | 0.00 | 0.00 | H |
| ATOM | 2415 | 3HA  | GLY | 153 | -4.323  | -17.199 | 11.761 | 0.00 | 0.00 | H |
| ATOM | 2416 | N    | LEU | 154 | -5.604  | -14.694 | 10.179 | 0.00 | 0.00 | N |
| ATOM | 2417 | CA   | LEU | 154 | -6.771  | -14.092 | 9.544  | 0.00 | 0.00 | C |
| ATOM | 2418 | C    | LEU | 154 | -6.447  | -13.868 | 8.060  | 0.00 | 0.00 | C |
| ATOM | 2419 | O    | LEU | 154 | -6.257  | -12.739 | 7.607  | 0.00 | 0.00 | O |
| ATOM | 2420 | CB   | LEU | 154 | -7.197  | -12.807 | 10.290 | 0.00 | 0.00 | C |
| ATOM | 2421 | CG   | LEU | 154 | -7.318  | -12.924 | 11.823 | 0.00 | 0.00 | C |
| ATOM | 2422 | CD1  | LEU | 154 | -7.649  | -11.544 | 12.412 | 0.00 | 0.00 | C |
| ATOM | 2423 | CD2  | LEU | 154 | -8.383  | -13.947 | 12.246 | 0.00 | 0.00 | C |
| ATOM | 2424 | H    | LEU | 154 | -4.905  | -14.057 | 10.530 | 0.00 | 0.00 | H |
| ATOM | 2425 | HA   | LEU | 154 | -7.603  | -14.795 | 9.603  | 0.00 | 0.00 | H |
| ATOM | 2426 | ZHB  | LEU | 154 | -6.485  | -12.015 | 10.068 | 0.00 | 0.00 | H |
| ATOM | 2427 | 3HB  | LEU | 154 | -8.161  | -12.495 | 9.893  | 0.00 | 0.00 | H |
| ATOM | 2428 | HG   | LEU | 154 | -6.359  | -13.233 | 12.239 | 0.00 | 0.00 | H |
| ATOM | 2429 | 1HD1 | LEU | 154 | -6.863  | -10.835 | 12.151 | 0.00 | 0.00 | H |
| ATOM | 2430 | 2HD1 | LEU | 154 | -8.602  | -11.185 | 12.019 | 0.00 | 0.00 | H |
| ATOM | 2431 | 3HD1 | LEU | 154 | -7.711  | -11.609 | 13.499 | 0.00 | 0.00 | H |
| ATOM | 2432 | 1HD2 | LEU | 154 | -8.106  | -14.942 | 11.900 | 0.00 | 0.00 | H |
| ATOM | 2433 | 2HD2 | LEU | 154 | -8.460  | -13.970 | 13.333 | 0.00 | 0.00 | H |
| ATOM | 2434 | 3HD2 | LEU | 154 | -9.352  | -13.676 | 11.824 | 0.00 | 0.00 | H |
| ATOM | 2435 | N    | THR | 155 | -6.327  | -14.980 | 7.322  | 0.00 | 0.00 | N |
| ATOM | 2436 | CA   | THR | 155 | -5.884  | -15.008 | 5.930  | 0.00 | 0.00 | C |
| ATOM | 2437 | C    | THR | 155 | -7.041  | -14.788 | 4.941  | 0.00 | 0.00 | C |
| ATOM | 2438 | O    | THR | 155 | -6.786  | -14.436 | 3.790  | 0.00 | 0.00 | O |
| ATOM | 2439 | CB   | THR | 155 | -5.134  | -16.322 | 5.642  | 0.00 | 0.00 | C |
| ATOM | 2440 | CG2  | THR | 155 | -3.946  | -16.545 | 6.592  | 0.00 | 0.00 | C |
| ATOM | 2441 | OG1  | THR | 155 | -6.016  | -17.422 | 5.738  | 0.00 | 0.00 | O |
| ATOM | 2442 | H    | THR | 155 | -6.489  | -15.874 | 7.763  | 0.00 | 0.00 | H |
| ATOM | 2443 | HA   | THR | 155 | -5.175  | -14.192 | 5.787  | 0.00 | 0.00 | H |
| ATOM | 2444 | HB   | THR | 155 | -4.751  | -16.272 | 4.623  | 0.00 | 0.00 | H |
| ATOM | 2445 | 1HG  | THR | 155 | -5.537  | -18.220 | 5.499  | 0.00 | 0.00 | H |
| ATOM | 2446 | 1HG2 | THR | 155 | -3.310  | -17.357 | 6.199  | 0.00 | 0.00 | H |
| ATOM | 2447 | 2HG2 | THR | 155 | -3.357  | -15.633 | 6.676  | 0.00 | 0.00 | H |
| ATOM | 2448 | 3HG2 | THR | 155 | -4.298  | -16.829 | 7.584  | 0.00 | 0.00 | H |
| ATOM | 2449 | N    | GLY | 156 | -8.297  | -14.958 | 5.388  | 0.00 | 0.00 | N |
| ATOM | 2450 | CA   | GLY | 156 | -9.491  | -14.523 | 4.669  | 0.00 | 0.00 | C |
| ATOM | 2451 | C    | GLY | 156 | -9.781  | -13.031 | 4.878  | 0.00 | 0.00 | C |
| ATOM | 2452 | O    | GLY | 156 | -10.482 | -12.430 | 4.064  | 0.00 | 0.00 | O |
| ATOM | 2453 | H    | GLY | 156 | -8.432  | -15.278 | 6.336  | 0.00 | 0.00 | H |
| ATOM | 2454 | ZHA  | GLY | 156 | -9.373  | -14.725 | 3.604  | 0.00 | 0.00 | H |
| ATOM | 2455 | 3HA  | GLY | 156 | -10.340 | -15.097 | 5.042  | 0.00 | 0.00 | H |
| ATOM | 2456 | N    | PHE | 157 | -9.207  | -12.431 | 5.934  | 0.00 | 0.00 | N |
| ATOM | 2457 | CA   | PHE | 157 | -9.251  | -10.999 | 6.221  | 0.00 | 0.00 | C |
| ATOM | 2458 | C    | PHE | 157 | -8.204  | -10.224 | 5.398  | 0.00 | 0.00 | C |
| ATOM | 2459 | O    | PHE | 157 | -8.171  | -8.996  | 5.458  | 0.00 | 0.00 | O |
| ATOM | 2460 | CB   | PHE | 157 | -9.072  | -10.807 | 7.735  | 0.00 | 0.00 | C |
| ATOM | 2461 | CG   | PHE | 157 | -9.696  | -9.557  | 8.328  | 0.00 | 0.00 | C |
| ATOM | 2462 | CD1  | PHE | 157 | -8.951  | -8.370  | 8.447  | 0.00 | 0.00 | C |
| ATOM | 2463 | CD2  | PHE | 157 | -11.012 | -9.602  | 8.829  | 0.00 | 0.00 | C |
| ATOM | 2464 | CE1  | PHE | 157 | -9.514  | -7.238  | 9.060  | 0.00 | 0.00 | C |
| ATOM | 2465 | CE2  | PHE | 157 | -11.574 | -8.472  | 9.447  | 0.00 | 0.00 | C |
| ATOM | 2466 | CZ   | PHE | 157 | -10.822 | -7.291  | 9.569  | 0.00 | 0.00 | C |
| ATOM | 2467 | H    | PHE | 157 | -8.644  | -12.994 | 6.557  | 0.00 | 0.00 | H |
| ATOM | 2468 | HA   | PHE | 157 | -10.241 | -10.635 | 5.948  | 0.00 | 0.00 | H |
| ATOM | 2469 | ZHB  | PHE | 157 | -9.525  | -11.658 | 8.246  | 0.00 | 0.00 | H |
| ATOM | 2470 | 3HB  | PHE | 157 | -8.009  | -10.816 | 7.973  | 0.00 | 0.00 | H |
| ATOM | 2471 | HD1  | PHE | 157 | -7.939  | -8.327  | 8.083  | 0.00 | 0.00 | H |
| ATOM | 2472 | HD2  | PHE | 157 | -11.592 | -10.511 | 8.752  | 0.00 | 0.00 | H |
| ATOM | 2473 | HE1  | PHE | 157 | -8.931  | -6.334  | 9.159  | 0.00 | 0.00 | H |
| ATOM | 2474 | HE2  | PHE | 157 | -12.580 | -8.514  | 9.838  | 0.00 | 0.00 | H |
| ATOM | 2475 | HZ   | PHE | 157 | -11.247 | -6.431  | 10.061 | 0.00 | 0.00 | H |
| ATOM | 2476 | N    | LEU | 158 | -7.368  | -10.927 | 4.613  | 0.00 | 0.00 | N |
| ATOM | 2477 | CA   | LEU | 158 | -6.382  | -10.348 | 3.706  | 0.00 | 0.00 | C |
| ATOM | 2478 | C    | LEU | 158 | -7.070  | -9.576  | 2.569  | 0.00 | 0.00 | C |
| ATOM | 2479 | O    | LEU | 158 | -6.617  | -8.491  | 2.207  | 0.00 | 0.00 | O |
| ATOM | 2480 | CB   | LEU | 158 | -5.523  | -11.501 | 3.153  | 0.00 | 0.00 | C |
| ATOM | 2481 | CG   | LEU | 158 | -4.308  | -11.071 | 2.308  | 0.00 | 0.00 | C |
| ATOM | 2482 | CD1  | LEU | 158 | -3.240  | -10.383 | 3.167  | 0.00 | 0.00 | C |
| ATOM | 2483 | CD2  | LEU | 158 | -3.691  | -12.300 | 1.625  | 0.00 | 0.00 | C |
| ATOM | 2484 | H    | LEU | 158 | -7.442  | -11.934 | 4.612  | 0.00 | 0.00 | H |
| ATOM | 2485 | HA   | LEU | 158 | -5.756  | -9.664  | 4.279  | 0.00 | 0.00 | H |
| ATOM | 2486 | ZHB  | LEU | 158 | -5.164  | -12.105 | 3.988  | 0.00 | 0.00 | H |
| ATOM | 2487 | 3HB  | LEU | 158 | -6.164  | -12.133 | 2.538  | 0.00 | 0.00 | H |
| ATOM | 2488 | HG   | LEU | 158 | -4.633  | -10.379 | 1.530  | 0.00 | 0.00 | H |
| ATOM | 2489 | 1HD1 | LEU | 158 | -3.668  | -9.513  | 3.658  | 0.00 | 0.00 | H |
| ATOM | 2490 | 2HD1 | LEU | 158 | -2.869  | -11.071 | 3.925  | 0.00 | 0.00 | H |

|      |      |      |     |     |         |         |        |      |      |   |
|------|------|------|-----|-----|---------|---------|--------|------|------|---|
| ATOM | 2491 | 3HD1 | LEU | 158 | -2.407  | -10.059 | 2.546  | 0.00 | 0.00 | H |
| ATOM | 2492 | 1HD2 | LEU | 158 | -3.353  | -13.017 | 2.370  | 0.00 | 0.00 | H |
| ATOM | 2493 | 2HD2 | LEU | 158 | -4.429  | -12.780 | 0.984  | 0.00 | 0.00 | H |
| ATOM | 2494 | 3HD2 | LEU | 158 | -2.842  | -11.992 | 1.018  | 0.00 | 0.00 | H |
| ATOM | 2495 | N    | GLY | 159 | -8.183  | -10.121 | 2.047  | 0.00 | 0.00 | N |
| ATOM | 2496 | CA   | GLY | 159 | -9.027  | -9.496  | 1.036  | 0.00 | 0.00 | C |
| ATOM | 2497 | C    | GLY | 159 | -9.994  | -8.447  | 1.601  | 0.00 | 0.00 | C |
| ATOM | 2498 | O    | GLY | 159 | -10.704 | -7.814  | 0.819  | 0.00 | 0.00 | O |
| ATOM | 2499 | H    | GLY | 159 | -8.492  | -11.015 | 2.404  | 0.00 | 0.00 | H |
| ATOM | 2500 | 2HA  | GLY | 159 | -8.393  | -9.028  | 0.283  | 0.00 | 0.00 | H |
| ATOM | 2501 | 3HA  | GLY | 159 | -9.611  | -10.279 | 0.554  | 0.00 | 0.00 | H |
| ATOM | 2502 | N    | GLN | 160 | -10.027 | -8.255  | 2.930  | 0.00 | 0.00 | N |
| ATOM | 2503 | CA   | GLN | 160 | -10.853 | -7.252  | 3.601  | 0.00 | 0.00 | C |
| ATOM | 2504 | C    | GLN | 160 | -10.052 | -5.975  | 3.882  | 0.00 | 0.00 | C |
| ATOM | 2505 | O    | GLN | 160 | -10.643 | -4.896  | 3.894  | 0.00 | 0.00 | O |
| ATOM | 2506 | CB   | GLN | 160 | -11.452 | -7.827  | 4.895  | 0.00 | 0.00 | C |
| ATOM | 2507 | CG   | GLN | 160 | -12.347 | -9.051  | 4.634  | 0.00 | 0.00 | C |
| ATOM | 2508 | CD   | GLN | 160 | -13.000 | -9.591  | 5.909  | 0.00 | 0.00 | C |
| ATOM | 2509 | NE2  | GLN | 160 | -13.087 | -10.919 | 6.026  | 0.00 | 0.00 | N |
| ATOM | 2510 | OE1  | GLN | 160 | -13.433 | -8.829  | 6.770  | 0.00 | 0.00 | O |
| ATOM | 2511 | H    | GLN | 160 | -9.421  | -8.811  | 3.517  | 0.00 | 0.00 | H |
| ATOM | 2512 | HA   | GLN | 160 | -11.684 | -6.985  | 2.948  | 0.00 | 0.00 | H |
| ATOM | 2513 | ZHB  | GLN | 160 | -10.652 | -8.103  | 5.582  | 0.00 | 0.00 | H |
| ATOM | 2514 | 3HB  | GLN | 160 | -12.052 | -7.047  | 5.367  | 0.00 | 0.00 | H |
| ATOM | 2515 | ZHG  | GLN | 160 | -13.133 | -8.780  | 3.929  | 0.00 | 0.00 | H |
| ATOM | 2516 | 3HG  | GLN | 160 | -11.748 | -9.843  | 4.181  | 0.00 | 0.00 | H |
| ATOM | 2517 | 1HE2 | GLN | 160 | -13.514 | -11.326 | 6.846  | 0.00 | 0.00 | H |
| ATOM | 2518 | ZHE2 | GLN | 160 | -12.722 | -11.516 | 5.297  | 0.00 | 0.00 | H |
| ATOM | 2519 | N    | VAL | 161 | -8.723  | -6.082  | 4.057  | 0.00 | 0.00 | N |
| ATOM | 2520 | CA   | VAL | 161 | -7.820  | -4.932  | 4.107  | 0.00 | 0.00 | C |
| ATOM | 2521 | C    | VAL | 161 | -7.623  | -4.370  | 2.688  | 0.00 | 0.00 | C |
| ATOM | 2522 | O    | VAL | 161 | -7.433  | -3.162  | 2.542  | 0.00 | 0.00 | O |
| ATOM | 2523 | CB   | VAL | 161 | -6.481  | -5.317  | 4.779  | 0.00 | 0.00 | C |
| ATOM | 2524 | CG1  | VAL | 161 | -5.531  | -4.109  | 4.842  | 0.00 | 0.00 | C |
| ATOM | 2525 | CG2  | VAL | 161 | -6.677  | -5.820  | 6.222  | 0.00 | 0.00 | C |
| ATOM | 2526 | H    | VAL | 161 | -8.300  | -6.999  | 4.051  | 0.00 | 0.00 | H |
| ATOM | 2527 | HA   | VAL | 161 | -8.289  | -4.157  | 4.713  | 0.00 | 0.00 | H |
| ATOM | 2528 | HB   | VAL | 161 | -6.004  | -6.108  | 4.197  | 0.00 | 0.00 | H |
| ATOM | 2529 | 1HG1 | VAL | 161 | -4.612  | -4.384  | 5.356  | 0.00 | 0.00 | H |
| ATOM | 2530 | 2HG1 | VAL | 161 | -5.265  | -3.778  | 3.841  | 0.00 | 0.00 | H |
| ATOM | 2531 | 3HG1 | VAL | 161 | -6.011  | -3.287  | 5.371  | 0.00 | 0.00 | H |
| ATOM | 2532 | 1HG2 | VAL | 161 | -7.131  | -5.044  | 6.834  | 0.00 | 0.00 | H |
| ATOM | 2533 | 2HG2 | VAL | 161 | -7.316  | -6.700  | 6.237  | 0.00 | 0.00 | H |
| ATOM | 2534 | 3HG2 | VAL | 161 | -5.714  | -6.088  | 6.655  | 0.00 | 0.00 | H |
| ATOM | 2535 | N    | THR | 162 | -7.742  | -5.217  | 1.650  | 0.00 | 0.00 | N |
| ATOM | 2536 | CA   | THR | 162 | -7.837  | -4.786  | 0.259  | 0.00 | 0.00 | C |
| ATOM | 2537 | C    | THR | 162 | -9.052  | -3.869  | 0.092  | 0.00 | 0.00 | C |
| ATOM | 2538 | O    | THR | 162 | -8.924  | -2.796  | -0.493 | 0.00 | 0.00 | O |
| ATOM | 2539 | CB   | THR | 162 | -7.970  | -6.015  | -0.665 | 0.00 | 0.00 | C |
| ATOM | 2540 | CG2  | THR | 162 | -8.105  | -5.618  | -2.141 | 0.00 | 0.00 | C |
| ATOM | 2541 | OG1  | THR | 162 | -6.865  | -6.883  | -0.525 | 0.00 | 0.00 | O |
| ATOM | 2542 | H    | THR | 162 | -7.893  | -6.198  | 1.836  | 0.00 | 0.00 | H |
| ATOM | 2543 | HA   | THR | 162 | -6.941  | -4.229  | -0.007 | 0.00 | 0.00 | H |
| ATOM | 2544 | HB   | THR | 162 | -8.867  | -6.564  | -0.386 | 0.00 | 0.00 | H |
| ATOM | 2545 | 1HG  | THR | 162 | -6.824  | -7.181  | 0.387  | 0.00 | 0.00 | H |
| ATOM | 2546 | 1HG2 | THR | 162 | -8.982  | -4.991  | -2.287 | 0.00 | 0.00 | H |
| ATOM | 2547 | ZHG2 | THR | 162 | -7.219  | -5.075  | -2.470 | 0.00 | 0.00 | H |
| ATOM | 2548 | 3HG2 | THR | 162 | -8.236  | -6.515  | -2.746 | 0.00 | 0.00 | H |
| ATOM | 2549 | N    | ARG | 163 | -10.207 | -4.285  | 0.632  | 0.00 | 0.00 | N |
| ATOM | 2550 | CA   | ARG | 163 | -11.478 | -3.594  | 0.481  | 0.00 | 0.00 | C |
| ATOM | 2551 | C    | ARG | 163 | -11.537 | -2.295  | 1.302  | 0.00 | 0.00 | C |
| ATOM | 2552 | O    | ARG | 163 | -12.300 | -1.400  | 0.942  | 0.00 | 0.00 | O |
| ATOM | 2553 | CB   | ARG | 163 | -12.595 | -4.579  | 0.859  | 0.00 | 0.00 | C |
| ATOM | 2554 | CG   | ARG | 163 | -13.985 | -4.102  | 0.404  | 0.00 | 0.00 | C |
| ATOM | 2555 | CD   | ARG | 163 | -15.077 | -5.147  | 0.674  | 0.00 | 0.00 | C |
| ATOM | 2556 | NE   | ARG | 163 | -14.844 | -6.416  | -0.038 | 0.00 | 0.00 | N |
| ATOM | 2557 | CZ   | ARG | 163 | -15.042 | -6.641  | -1.349 | 0.00 | 0.00 | C |
| ATOM | 2558 | NH1  | ARG | 163 | -14.754 | -7.847  | -1.853 | 0.00 | 0.00 | N |
| ATOM | 2559 | NH2  | ARG | 163 | -15.519 | -5.691  | -2.168 | 0.00 | 0.00 | N |
| ATOM | 2560 | H    | ARG | 163 | -10.222 | -5.168  | 1.124  | 0.00 | 0.00 | H |
| ATOM | 2561 | HA   | ARG | 163 | -11.593 | -3.341  | -0.574 | 0.00 | 0.00 | H |
| ATOM | 2562 | ZHB  | ARG | 163 | -12.382 | -5.534  | 0.378  | 0.00 | 0.00 | H |
| ATOM | 2563 | 3HB  | ARG | 163 | -12.600 | -4.732  | 1.939  | 0.00 | 0.00 | H |
| ATOM | 2564 | ZHG  | ARG | 163 | -14.248 | -3.192  | 0.942  | 0.00 | 0.00 | H |
| ATOM | 2565 | 3HG  | ARG | 163 | -13.957 | -3.876  | -0.663 | 0.00 | 0.00 | H |
| ATOM | 2566 | ZHD  | ARG | 163 | -15.115 | -5.350  | 1.744  | 0.00 | 0.00 | H |
| ATOM | 2567 | 3HD  | ARG | 163 | -16.042 | -4.738  | 0.371  | 0.00 | 0.00 | H |
| ATOM | 2568 | HE   | ARG | 163 | -14.484 | -7.177  | 0.520  | 0.00 | 0.00 | H |
| ATOM | 2569 | 1HH1 | ARG | 163 | -14.393 | -8.572  | -1.249 | 0.00 | 0.00 | H |
| ATOM | 2570 | 2HH1 | ARG | 163 | -14.896 | -8.032  | -2.835 | 0.00 | 0.00 | H |
| ATOM | 2571 | 1HH2 | ARG | 163 | -15.739 | -4.775  | -1.803 | 0.00 | 0.00 | H |
| ATOM | 2572 | 2HH2 | ARG | 163 | -15.654 | -5.889  | -3.148 | 0.00 | 0.00 | H |
| ATOM | 2573 | N    | PHE | 164 | -10.727 | -2.173  | 2.367  | 0.00 | 0.00 | N |
| ATOM | 2574 | CA   | PHE | 164 | -10.697 | -0.997  | 3.230  | 0.00 | 0.00 | C |
| ATOM | 2575 | C    | PHE | 164 | -9.818  | 0.123   | 2.657  | 0.00 | 0.00 | C |
| ATOM | 2576 | O    | PHE | 164 | -10.116 | 1.292   | 2.891  | 0.00 | 0.00 | O |
| ATOM | 2577 | CB   | PHE | 164 | -10.230 | -1.399  | 4.634  | 0.00 | 0.00 | C |
| ATOM | 2578 | CG   | PHE | 164 | -10.426 | -0.294  | 5.656  | 0.00 | 0.00 | C |
| ATOM | 2579 | CD1  | PHE | 164 | -9.359  | 0.556   | 6.011  | 0.00 | 0.00 | C |
| ATOM | 2580 | CD2  | PHE | 164 | -11.700 | -0.086  | 6.218  | 0.00 | 0.00 | C |
| ATOM | 2581 | CE1  | PHE | 164 | -9.572  | 1.608   | 6.920  | 0.00 | 0.00 | C |
| ATOM | 2582 | CE2  | PHE | 164 | -11.912 | 0.969   | 7.123  | 0.00 | 0.00 | C |
| ATOM | 2583 | CZ   | PHE | 164 | -10.849 | 1.820   | 7.468  | 0.00 | 0.00 | C |
| ATOM | 2584 | H    | PHE | 164 | -10.111 | -2.938  | 2.606  | 0.00 | 0.00 | H |
| ATOM | 2585 | HA   | PHE | 164 | -11.716 | -0.618  | 3.317  | 0.00 | 0.00 | H |
| ATOM | 2586 | ZHB  | PHE | 164 | -10.799 | -2.270  | 4.962  | 0.00 | 0.00 | H |
| ATOM | 2587 | 3HB  | PHE | 164 | -9.177  | -1.685  | 4.598  | 0.00 | 0.00 | H |
| ATOM | 2588 | HD1  | PHE | 164 | -8.379  | 0.409   | 5.582  | 0.00 | 0.00 | H |
| ATOM | 2589 | HD2  | PHE | 164 | -12.525 | -0.730  | 5.947  | 0.00 | 0.00 | H |
| ATOM | 2590 | HE1  | PHE | 164 | -8.758  | 2.259   | 7.198  | 0.00 | 0.00 | H |
| ATOM | 2591 | HE2  | PHE | 164 | -12.891 | 1.128   | 7.548  | 0.00 | 0.00 | H |
| ATOM | 2592 | HZ   | PHE | 164 | -11.012 | 2.630   | 8.164  | 0.00 | 0.00 | H |
| ATOM | 2593 | N    | VAL | 165 | -8.766  | -0.223  | 1.897  | 0.00 | 0.00 | N |
| ATOM | 2594 | CA   | VAL | 165 | -7.889  | 0.735   | 1.221  | 0.00 | 0.00 | C |
| ATOM | 2595 | C    | VAL | 165 | -8.518  | 1.182   | -0.112 | 0.00 | 0.00 | C |

|      |      |      |     |     |         |        |        |      |      |   |
|------|------|------|-----|-----|---------|--------|--------|------|------|---|
| ATOM | 2596 | O    | VAL | 165 | -8.295  | 2.316  | -0.534 | 0.00 | 0.00 | O |
| ATOM | 2597 | CB   | VAL | 165 | -6.478  | 0.116  | 1.067  | 0.00 | 0.00 | C |
| ATOM | 2598 | CG1  | VAL | 165 | -5.537  | 0.996  | 0.226  | 0.00 | 0.00 | C |
| ATOM | 2599 | CG2  | VAL | 165 | -5.833  | -0.080 | 2.453  | 0.00 | 0.00 | C |
| ATOM | 2600 | H    | VAL | 165 | -8.576  | -1.203 | 1.746  | 0.00 | 0.00 | H |
| ATOM | 2601 | HA   | VAL | 165 | -7.794  | 1.621  | 1.850  | 0.00 | 0.00 | H |
| ATOM | 2602 | HB   | VAL | 165 | -6.564  | -0.856 | 0.579  | 0.00 | 0.00 | H |
| ATOM | 2603 | 1HG1 | VAL | 165 | -5.496  | 2.004  | 0.642  | 0.00 | 0.00 | H |
| ATOM | 2604 | 2HG1 | VAL | 165 | -4.533  | 0.572  | 0.225  | 0.00 | 0.00 | H |
| ATOM | 2605 | 3HG1 | VAL | 165 | -5.886  | 1.044  | -0.806 | 0.00 | 0.00 | H |
| ATOM | 2606 | 1HG2 | VAL | 165 | -5.743  | 0.881  | 2.958  | 0.00 | 0.00 | H |
| ATOM | 2607 | 2HG2 | VAL | 165 | -6.434  | -0.746 | 3.070  | 0.00 | 0.00 | H |
| ATOM | 2608 | 3HG2 | VAL | 165 | -4.840  | -0.516 | 2.347  | 0.00 | 0.00 | H |
| ATOM | 2609 | N    | VAL | 166 | -9.352  | 0.330  | -0.727 | 0.00 | 0.00 | N |
| ATOM | 2610 | CA   | VAL | 166 | -10.201 | 0.670  | -1.867 | 0.00 | 0.00 | C |
| ATOM | 2611 | C    | VAL | 166 | -11.274 | 1.680  | -1.444 | 0.00 | 0.00 | C |
| ATOM | 2612 | O    | VAL | 166 | -11.540 | 2.622  | -2.191 | 0.00 | 0.00 | O |
| ATOM | 2613 | CB   | VAL | 166 | -10.814 | -0.635 | -2.424 | 0.00 | 0.00 | C |
| ATOM | 2614 | CG1  | VAL | 166 | -12.066 | -0.418 | -3.290 | 0.00 | 0.00 | C |
| ATOM | 2615 | CG2  | VAL | 166 | -9.767  | -1.386 | -3.260 | 0.00 | 0.00 | C |
| ATOM | 2616 | H    | VAL | 166 | -9.484  | -0.588 | -0.326 | 0.00 | 0.00 | H |
| ATOM | 2617 | HA   | VAL | 166 | -9.589  | 1.131  | -2.644 | 0.00 | 0.00 | H |
| ATOM | 2618 | HB   | VAL | 166 | -11.107 | -1.272 | -1.589 | 0.00 | 0.00 | H |
| ATOM | 2619 | 1HG1 | VAL | 166 | -12.893 | -0.066 | -2.672 | 0.00 | 0.00 | H |
| ATOM | 2620 | 2HG1 | VAL | 166 | -11.861 | 0.320  | -4.063 | 0.00 | 0.00 | H |
| ATOM | 2621 | 3HG1 | VAL | 166 | -12.367 | -1.356 | -3.757 | 0.00 | 0.00 | H |
| ATOM | 2622 | 1HG2 | VAL | 166 | -9.558  | -0.834 | -4.173 | 0.00 | 0.00 | H |
| ATOM | 2623 | 2HG2 | VAL | 166 | -8.838  | -1.504 | -2.705 | 0.00 | 0.00 | H |
| ATOM | 2624 | 3HG2 | VAL | 166 | -10.150 | -2.373 | -3.513 | 0.00 | 0.00 | H |
| ATOM | 2625 | N    | ASP | 167 | -11.861 | 1.501  | -0.250 | 0.00 | 0.00 | N |
| ATOM | 2626 | CA   | ASP | 167 | -12.912 | 2.361  | 0.273  | 0.00 | 0.00 | C |
| ATOM | 2627 | C    | ASP | 167 | -12.349 | 3.695  | 0.777  | 0.00 | 0.00 | C |
| ATOM | 2628 | O    | ASP | 167 | -13.022 | 4.714  | 0.638  | 0.00 | 0.00 | O |
| ATOM | 2629 | CB   | ASP | 167 | -13.658 | 1.612  | 1.389  | 0.00 | 0.00 | C |
| ATOM | 2630 | CG   | ASP | 167 | -14.848 | 2.411  | 1.920  | 0.00 | 0.00 | C |
| ATOM | 2631 | OD1  | ASP | 167 | -15.927 | 2.307  | 1.297  | 0.00 | 0.00 | O |
| ATOM | 2632 | OD2  | ASP | 167 | -14.660 | 3.116  | 2.935  | 0.00 | 0.00 | O |
| ATOM | 2633 | H    | ASP | 167 | -11.584 | 0.713  | 0.319  | 0.00 | 0.00 | H |
| ATOM | 2634 | HA   | ASP | 167 | -13.622 | 2.564  | -0.530 | 0.00 | 0.00 | H |
| ATOM | 2635 | 2HB  | ASP | 167 | -14.026 | 0.665  | 0.994  | 0.00 | 0.00 | H |
| ATOM | 2636 | 3HB  | ASP | 167 | -12.970 | 1.396  | 2.207  | 0.00 | 0.00 | H |
| ATOM | 2637 | N    | PHE | 168 | -11.127 | 3.705  | 1.333  | 0.00 | 0.00 | N |
| ATOM | 2638 | CA   | PHE | 168 | -10.526 | 4.915  | 1.876  | 0.00 | 0.00 | C |
| ATOM | 2639 | C    | PHE | 168 | -10.069 | 5.861  | 0.762  | 0.00 | 0.00 | C |
| ATOM | 2640 | O    | PHE | 168 | -10.217 | 7.072  | 0.913  | 0.00 | 0.00 | O |
| ATOM | 2641 | CB   | PHE | 168 | -9.364  | 4.574  | 2.817  | 0.00 | 0.00 | C |
| ATOM | 2642 | CG   | PHE | 168 | -8.810  | 5.818  | 3.486  | 0.00 | 0.00 | C |
| ATOM | 2643 | CD1  | PHE | 168 | -9.488  | 6.376  | 4.587  | 0.00 | 0.00 | C |
| ATOM | 2644 | CD2  | PHE | 168 | -7.694  | 6.485  | 2.942  | 0.00 | 0.00 | C |
| ATOM | 2645 | CE1  | PHE | 168 | -9.068  | 7.603  | 5.127  | 0.00 | 0.00 | C |
| ATOM | 2646 | CE2  | PHE | 168 | -7.277  | 7.714  | 3.482  | 0.00 | 0.00 | C |
| ATOM | 2647 | CZ   | PHE | 168 | -7.971  | 8.277  | 4.566  | 0.00 | 0.00 | C |
| ATOM | 2648 | H    | PHE | 168 | -10.606 | 2.842  | 1.413  | 0.00 | 0.00 | H |
| ATOM | 2649 | HA   | PHE | 168 | -11.287 | 5.429  | 2.466  | 0.00 | 0.00 | H |
| ATOM | 2650 | 2HB  | PHE | 168 | -9.719  | 3.891  | 3.591  | 0.00 | 0.00 | H |
| ATOM | 2651 | 3HB  | PHE | 168 | -8.574  | 4.073  | 2.257  | 0.00 | 0.00 | H |
| ATOM | 2652 | HD1  | PHE | 168 | -10.354 | 5.879  | 5.001  | 0.00 | 0.00 | H |
| ATOM | 2653 | HD2  | PHE | 168 | -7.180  | 6.073  | 2.085  | 0.00 | 0.00 | H |
| ATOM | 2654 | HE1  | PHE | 168 | -9.604  | 8.037  | 5.957  | 0.00 | 0.00 | H |
| ATOM | 2655 | HE2  | PHE | 168 | -6.429  | 8.231  | 3.058  | 0.00 | 0.00 | H |
| ATOM | 2656 | HZ   | PHE | 168 | -7.668  | 9.232  | 4.961  | 0.00 | 0.00 | H |
| ATOM | 2657 | N    | MET | 169 | -9.549  | 5.325  | -0.353 | 0.00 | 0.00 | N |
| ATOM | 2658 | CA   | MET | 169 | -9.113  | 6.126  | -1.491 | 0.00 | 0.00 | C |
| ATOM | 2659 | C    | MET | 169 | -10.307 | 6.647  | -2.304 | 0.00 | 0.00 | C |
| ATOM | 2660 | O    | MET | 169 | -10.213 | 7.728  | -2.883 | 0.00 | 0.00 | O |
| ATOM | 2661 | CB   | MET | 169 | -8.132  | 5.315  | -2.354 | 0.00 | 0.00 | C |
| ATOM | 2662 | CG   | MET | 169 | -6.793  | 5.099  | -1.631 | 0.00 | 0.00 | C |
| ATOM | 2663 | SD   | MET | 169 | -5.558  | 4.199  | -2.600 | 0.00 | 0.00 | S |
| ATOM | 2664 | CE   | MET | 169 | -4.135  | 4.302  | -1.485 | 0.00 | 0.00 | C |
| ATOM | 2665 | H    | MET | 169 | -9.459  | 4.321  | -0.426 | 0.00 | 0.00 | H |
| ATOM | 2666 | HA   | MET | 169 | -8.582  | 6.996  | -1.105 | 0.00 | 0.00 | H |
| ATOM | 2667 | 2HB  | MET | 169 | -8.574  | 4.351  | -2.609 | 0.00 | 0.00 | H |
| ATOM | 2668 | 3HB  | MET | 169 | -7.936  | 5.860  | -3.278 | 0.00 | 0.00 | H |
| ATOM | 2669 | 2HG  | MET | 169 | -6.375  | 6.071  | -1.375 | 0.00 | 0.00 | H |
| ATOM | 2670 | 3HG  | MET | 169 | -6.966  | 4.555  | -0.703 | 0.00 | 0.00 | H |
| ATOM | 2671 | 1HE  | MET | 169 | -4.408  | 3.915  | -0.503 | 0.00 | 0.00 | H |
| ATOM | 2672 | 2HE  | MET | 169 | -3.311  | 3.715  | -1.890 | 0.00 | 0.00 | H |
| ATOM | 2673 | 3HE  | MET | 169 | -3.822  | 5.342  | -1.394 | 0.00 | 0.00 | H |
| ATOM | 2674 | N    | LEU | 170 | -11.440 | 5.928  | -2.292 | 0.00 | 0.00 | N |
| ATOM | 2675 | CA   | LEU | 170 | -12.693 | 6.358  | -2.908 | 0.00 | 0.00 | C |
| ATOM | 2676 | C    | LEU | 170 | -13.350 | 7.505  | -2.120 | 0.00 | 0.00 | C |
| ATOM | 2677 | O    | LEU | 170 | -14.042 | 8.326  | -2.722 | 0.00 | 0.00 | O |
| ATOM | 2678 | CB   | LEU | 170 | -13.620 | 5.130  | -2.998 | 0.00 | 0.00 | C |
| ATOM | 2679 | CG   | LEU | 170 | -15.004 | 5.378  | -3.631 | 0.00 | 0.00 | C |
| ATOM | 2680 | CD1  | LEU | 170 | -14.918 | 5.903  | -5.072 | 0.00 | 0.00 | C |
| ATOM | 2681 | CD2  | LEU | 170 | -15.812 | 4.072  | -3.612 | 0.00 | 0.00 | C |
| ATOM | 2682 | H    | LEU | 170 | -11.457 | 5.051  | -1.790 | 0.00 | 0.00 | H |
| ATOM | 2683 | HA   | LEU | 170 | -12.471 | 6.707  | -3.916 | 0.00 | 0.00 | H |
| ATOM | 2684 | 2HB  | LEU | 170 | -13.110 | 4.360  | -3.576 | 0.00 | 0.00 | H |
| ATOM | 2685 | 3HB  | LEU | 170 | -13.773 | 4.742  | -1.990 | 0.00 | 0.00 | H |
| ATOM | 2686 | HG   | LEU | 170 | -15.543 | 6.111  | -3.032 | 0.00 | 0.00 | H |
| ATOM | 2687 | 1HD1 | LEU | 170 | -14.415 | 5.174  | -5.705 | 0.00 | 0.00 | H |
| ATOM | 2688 | 2HD1 | LEU | 170 | -15.922 | 6.078  | -5.459 | 0.00 | 0.00 | H |
| ATOM | 2689 | 3HD1 | LEU | 170 | -14.373 | 6.846  | -5.102 | 0.00 | 0.00 | H |
| ATOM | 2690 | 1HD2 | LEU | 170 | -15.315 | 3.313  | -4.216 | 0.00 | 0.00 | H |
| ATOM | 2691 | 2HD2 | LEU | 170 | -15.906 | 3.709  | -2.588 | 0.00 | 0.00 | H |
| ATOM | 2692 | 3HD2 | LEU | 170 | -16.812 | 4.250  | -4.012 | 0.00 | 0.00 | H |
| ATOM | 2693 | N    | HIP | 171 | -13.123 | 7.571  | -0.796 | 0.00 | 0.00 | N |
| ATOM | 2694 | CA   | HIP | 171 | -13.768 | 8.510  | 0.123  | 0.00 | 0.00 | C |
| ATOM | 2695 | C    | HIP | 171 | -12.764 | 9.463  | 0.798  | 0.00 | 0.00 | C |
| ATOM | 2696 | O    | HIP | 171 | -13.046 | 9.998  | 1.871  | 0.00 | 0.00 | O |
| ATOM | 2697 | CB   | HIP | 171 | -14.648 | 7.733  | 1.117  | 0.00 | 0.00 | C |
| ATOM | 2698 | CG   | HIP | 171 | -15.715 | 6.895  | 0.451  | 0.00 | 0.00 | C |
| ATOM | 2699 | CD2  | HIP | 171 | -16.638 | 7.334  | -0.460 | 0.00 | 0.00 | C |
| ATOM | 2700 | ND1  | HIP | 171 | -15.930 | 5.542  | 0.641  | 0.00 | 0.00 | N |

|      |      |      |     |     |         |        |        |      |      |   |
|------|------|------|-----|-----|---------|--------|--------|------|------|---|
| ATOM | 2701 | CE1  | HIP | 171 | -16.956 | 5.168  | -0.144 | 0.00 | 0.00 | C |
| ATOM | 2702 | NE2  | HIP | 171 | -17.402 | 6.242  | -0.820 | 0.00 | 0.00 | N |
| ATOM | 2703 | H    | HIP | 171 | -12.522 | 6.874  | -0.378 | 0.00 | 0.00 | H |
| ATOM | 2704 | HA   | HIP | 171 | -14.435 | 9.148  | -0.455 | 0.00 | 0.00 | H |
| ATOM | 2705 | ZHB  | HIP | 171 | -14.014 | 7.089  | 1.729  | 0.00 | 0.00 | H |
| ATOM | 2706 | 3HB  | HIP | 171 | -15.149 | 8.440  | 1.780  | 0.00 | 0.00 | H |
| ATOM | 2707 | HD1  | HIP | 171 | -15.399 | 4.936  | 1.252  | 0.00 | 0.00 | H |
| ATOM | 2708 | HD2  | HIP | 171 | -16.743 | 8.341  | -0.836 | 0.00 | 0.00 | H |
| ATOM | 2709 | HE1  | HIP | 171 | -17.353 | 4.167  | -0.223 | 0.00 | 0.00 | H |
| ATOM | 2710 | HE2  | HIP | 171 | -18.162 | 6.248  | -1.486 | 0.00 | 0.00 | H |
| ATOM | 2711 | N    | HIP | 172 | -11.606 | 9.692  | 0.157  | 0.00 | 0.00 | N |
| ATOM | 2712 | CA   | HIP | 172 | -10.633 | 10.722 | 0.527  | 0.00 | 0.00 | C |
| ATOM | 2713 | C    | HIP | 172 | -10.044 | 11.404 | -0.728 | 0.00 | 0.00 | C |
| ATOM | 2714 | O    | HIP | 172 | -9.058  | 12.133 | -0.626 | 0.00 | 0.00 | O |
| ATOM | 2715 | CB   | HIP | 172 | -9.566  | 10.124 | 1.464  | 0.00 | 0.00 | C |
| ATOM | 2716 | CG   | HIP | 172 | -8.835  | 11.150 | 2.297  | 0.00 | 0.00 | C |
| ATOM | 2717 | CD2  | HIP | 172 | -7.585  | 11.655 | 2.064  | 0.00 | 0.00 | C |
| ATOM | 2718 | ND1  | HIP | 172 | -9.323  | 11.755 | 3.441  | 0.00 | 0.00 | N |
| ATOM | 2719 | CE1  | HIP | 172 | -8.392  | 12.618 | 3.885  | 0.00 | 0.00 | C |
| ATOM | 2720 | NE2  | HIP | 172 | -7.327  | 12.569 | 3.065  | 0.00 | 0.00 | N |
| ATOM | 2721 | H    | HIP | 172 | -11.428 | 9.197  | -0.704 | 0.00 | 0.00 | H |
| ATOM | 2722 | HA   | HIP | 172 | -11.167 | 11.494 | 1.082  | 0.00 | 0.00 | H |
| ATOM | 2723 | ZHB  | HIP | 172 | -10.053 | 9.442  | 2.162  | 0.00 | 0.00 | H |
| ATOM | 2724 | 3HB  | HIP | 172 | -8.851  | 9.545  | 0.880  | 0.00 | 0.00 | H |
| ATOM | 2725 | HD1  | HIP | 172 | -10.226 | 11.588 | 3.862  | 0.00 | 0.00 | H |
| ATOM | 2726 | HD2  | HIP | 172 | -6.930  | 11.405 | 1.243  | 0.00 | 0.00 | H |
| ATOM | 2727 | HE1  | HIP | 172 | -8.484  | 13.254 | 4.752  | 0.00 | 0.00 | H |
| ATOM | 2728 | HE2  | HIP | 172 | -6.484  | 13.119 | 3.160  | 0.00 | 0.00 | H |
| ATOM | 2729 | N    | CYS | 173 | -10.669 | 11.187 | -1.902 | 0.00 | 0.00 | N |
| ATOM | 2730 | CA   | CYS | 173 | -10.313 | 11.769 | -3.198 | 0.00 | 0.00 | C |
| ATOM | 2731 | C    | CYS | 173 | -8.885  | 11.435 | -3.665 | 0.00 | 0.00 | C |
| ATOM | 2732 | O    | CYS | 173 | -8.283  | 12.204 | -4.415 | 0.00 | 0.00 | O |
| ATOM | 2733 | CB   | CYS | 173 | -10.637 | 13.273 | -3.228 | 0.00 | 0.00 | C |
| ATOM | 2734 | SG   | CYS | 173 | -12.369 | 13.568 | -2.778 | 0.00 | 0.00 | S |
| ATOM | 2735 | H    | CYS | 173 | -11.476 | 10.582 | -1.901 | 0.00 | 0.00 | H |
| ATOM | 2736 | HA   | CYS | 173 | -10.978 | 11.295 | -3.922 | 0.00 | 0.00 | H |
| ATOM | 2737 | ZHB  | CYS | 173 | -9.989  | 13.804 | -2.530 | 0.00 | 0.00 | H |
| ATOM | 2738 | 3HB  | CYS | 173 | -10.467 | 13.663 | -4.232 | 0.00 | 0.00 | H |
| ATOM | 2739 | HG   | CYS | 173 | -12.324 | 14.897 | -2.911 | 0.00 | 0.00 | H |
| ATOM | 2740 | N    | ILE | 174 | -8.345  | 10.287 | -3.225 | 0.00 | 0.00 | N |
| ATOM | 2741 | CA   | ILE | 174 | -7.031  | 9.788  | -3.623 | 0.00 | 0.00 | C |
| ATOM | 2742 | C    | ILE | 174 | -7.169  | 9.051  | -4.963 | 0.00 | 0.00 | C |
| ATOM | 2743 | O    | ILE | 174 | -6.344  | 9.257  | -5.851 | 0.00 | 0.00 | O |
| ATOM | 2744 | CB   | ILE | 174 | -6.446  | 8.879  | -2.517 | 0.00 | 0.00 | C |
| ATOM | 2745 | CG1  | ILE | 174 | -6.362  | 9.604  | -1.152 | 0.00 | 0.00 | C |
| ATOM | 2746 | CG2  | ILE | 174 | -5.056  | 8.358  | -2.932 | 0.00 | 0.00 | C |
| ATOM | 2747 | CD1  | ILE | 174 | -6.081  | 8.665  | 0.024  | 0.00 | 0.00 | C |
| ATOM | 2748 | H    | ILE | 174 | -8.886  | 9.702  | -2.605 | 0.00 | 0.00 | H |
| ATOM | 2749 | HA   | ILE | 174 | -6.358  | 10.636 | -3.758 | 0.00 | 0.00 | H |
| ATOM | 2750 | HB   | ILE | 174 | -7.110  | 8.026  | -2.409 | 0.00 | 0.00 | H |
| ATOM | 2751 | ZHG1 | ILE | 174 | -5.590  | 10.374 | -1.191 | 0.00 | 0.00 | H |
| ATOM | 2752 | 3HG1 | ILE | 174 | -7.309  | 10.093 | -0.934 | 0.00 | 0.00 | H |
| ATOM | 2753 | 1HG2 | ILE | 174 | -4.647  | 7.694  | -2.172 | 0.00 | 0.00 | H |
| ATOM | 2754 | ZHG2 | ILE | 174 | -5.122  | 7.786  | -3.857 | 0.00 | 0.00 | H |
| ATOM | 2755 | 3HG2 | ILE | 174 | -4.377  | 9.199  | -3.075 | 0.00 | 0.00 | H |
| ATOM | 2756 | 1HD1 | ILE | 174 | -6.145  | 9.227  | 0.952  | 0.00 | 0.00 | H |
| ATOM | 2757 | ZHD1 | ILE | 174 | -6.823  | 7.867  | 0.054  | 0.00 | 0.00 | H |
| ATOM | 2758 | 3HD1 | ILE | 174 | -5.085  | 8.237  | -0.059 | 0.00 | 0.00 | H |
| ATOM | 2759 | N    | ALA | 175 | -8.233  | 8.249  | -5.128 | 0.00 | 0.00 | N |
| ATOM | 2760 | CA   | ALA | 175 | -8.600  | 7.617  | -6.391 | 0.00 | 0.00 | C |
| ATOM | 2761 | C    | ALA | 175 | -9.116  | 8.643  | -7.411 | 0.00 | 0.00 | C |
| ATOM | 2762 | O    | ALA | 175 | -9.062  | 8.373  | -8.610 | 0.00 | 0.00 | O |
| ATOM | 2763 | CB   | ALA | 175 | -9.658  | 6.540  | -6.126 | 0.00 | 0.00 | C |
| ATOM | 2764 | H    | ALA | 175 | -8.871  | 8.124  | -4.356 | 0.00 | 0.00 | H |
| ATOM | 2765 | HA   | ALA | 175 | -7.714  | 7.132  | -6.805 | 0.00 | 0.00 | H |
| ATOM | 2766 | 1HB  | ALA | 175 | -9.267  | 5.798  | -5.429 | 0.00 | 0.00 | H |
| ATOM | 2767 | ZHB  | ALA | 175 | -10.557 | 6.992  | -5.706 | 0.00 | 0.00 | H |
| ATOM | 2768 | 3HB  | ALA | 175 | -9.916  | 6.041  | -7.060 | 0.00 | 0.00 | H |
| ATOM | 2769 | N    | ARG | 176 | -9.576  | 9.820  | -6.954 | 0.00 | 0.00 | N |
| ATOM | 2770 | CA   | ARG | 176 | -9.960  | 10.937 | -7.811 | 0.00 | 0.00 | C |
| ATOM | 2771 | C    | ARG | 176 | -8.720  | 11.651 | -8.364 | 0.00 | 0.00 | C |
| ATOM | 2772 | O    | ARG | 176 | -8.734  | 12.073 | -9.518 | 0.00 | 0.00 | O |
| ATOM | 2773 | CB   | ARG | 176 | -10.850 | 11.898 | -7.004 | 0.00 | 0.00 | C |
| ATOM | 2774 | CG   | ARG | 176 | -11.543 | 12.939 | -7.897 | 0.00 | 0.00 | C |
| ATOM | 2775 | CD   | ARG | 176 | -12.318 | 13.981 | -7.082 | 0.00 | 0.00 | C |
| ATOM | 2776 | NE   | ARG | 176 | -13.442 | 13.391 | -6.342 | 0.00 | 0.00 | N |
| ATOM | 2777 | CZ   | ARG | 176 | -14.329 | 14.082 | -5.603 | 0.00 | 0.00 | C |
| ATOM | 2778 | NH1  | ARG | 176 | -14.257 | 15.416 | -5.485 | 0.00 | 0.00 | N |
| ATOM | 2779 | NH2  | ARG | 176 | -15.305 | 13.424 | -4.966 | 0.00 | 0.00 | N |
| ATOM | 2780 | H    | ARG | 176 | -9.597  | 9.981  | -5.956 | 0.00 | 0.00 | H |
| ATOM | 2781 | HA   | ARG | 176 | -10.540 | 10.545 | -8.648 | 0.00 | 0.00 | H |
| ATOM | 2782 | ZHB  | ARG | 176 | -11.612 | 11.322 | -6.478 | 0.00 | 0.00 | H |
| ATOM | 2783 | 3HB  | ARG | 176 | -10.237 | 12.413 | -6.265 | 0.00 | 0.00 | H |
| ATOM | 2784 | ZHG  | ARG | 176 | -10.794 | 13.470 | -8.485 | 0.00 | 0.00 | H |
| ATOM | 2785 | 3HG  | ARG | 176 | -12.226 | 12.434 | -8.584 | 0.00 | 0.00 | H |
| ATOM | 2786 | ZHD  | ARG | 176 | -11.638 | 14.463 | -6.379 | 0.00 | 0.00 | H |
| ATOM | 2787 | 3HD  | ARG | 176 | -12.705 | 14.736 | -7.766 | 0.00 | 0.00 | H |
| ATOM | 2788 | HE   | ARG | 176 | -13.548 | 12.387 | -6.398 | 0.00 | 0.00 | H |
| ATOM | 2789 | 1HH1 | ARG | 176 | -13.525 | 15.925 | -5.960 | 0.00 | 0.00 | H |
| ATOM | 2790 | ZHH1 | ARG | 176 | -14.935 | 15.910 | -4.925 | 0.00 | 0.00 | H |
| ATOM | 2791 | 1HH2 | ARG | 176 | -15.374 | 12.420 | -5.051 | 0.00 | 0.00 | H |
| ATOM | 2792 | ZHH2 | ARG | 176 | -15.977 | 13.931 | -4.409 | 0.00 | 0.00 | H |
| ATOM | 2793 | N    | TRP | 177 | -7.646  | 11.751 | -7.565 | 0.00 | 0.00 | N |
| ATOM | 2794 | CA   | TRP | 177 | -6.380  | 12.363 | -7.960 | 0.00 | 0.00 | C |
| ATOM | 2795 | C    | TRP | 177 | -5.593  | 11.471 | -8.935 | 0.00 | 0.00 | C |
| ATOM | 2796 | O    | TRP | 177 | -4.794  | 11.986 | -9.715 | 0.00 | 0.00 | O |
| ATOM | 2797 | CB   | TRP | 177 | -5.569  | 12.656 | -6.690 | 0.00 | 0.00 | C |
| ATOM | 2798 | CG   | TRP | 177 | -4.310  | 13.446 | -6.885 | 0.00 | 0.00 | C |
| ATOM | 2799 | CD1  | TRP | 177 | -4.228  | 14.794 | -6.882 | 0.00 | 0.00 | C |
| ATOM | 2800 | CD2  | TRP | 177 | -2.945  | 12.971 | -7.110 | 0.00 | 0.00 | C |
| ATOM | 2801 | CE2  | TRP | 177 | -2.085  | 14.104 | -7.227 | 0.00 | 0.00 | C |
| ATOM | 2802 | CE3  | TRP | 177 | -2.344  | 11.699 | -7.235 | 0.00 | 0.00 | C |
| ATOM | 2803 | NE1  | TRP | 177 | -2.923  | 15.187 | -7.077 | 0.00 | 0.00 | N |
| ATOM | 2804 | CZ2  | TRP | 177 | -0.708  | 13.981 | -7.468 | 0.00 | 0.00 | C |
| ATOM | 2805 | CZ3  | TRP | 177 | -0.966  | 11.564 | -7.487 | 0.00 | 0.00 | C |



|      |      |      |     |     |         |        |         |      |      |   |
|------|------|------|-----|-----|---------|--------|---------|------|------|---|
| ATOM | 2806 | CH2  | TRP | 177 | -0.150  | 12.702 | -7.612  | 0.00 | 0.00 | C |
| ATOM | 2807 | H    | TRP | 177 | -7.699  | 11.373 | -6.629  | 0.00 | 0.00 | H |
| ATOM | 2808 | HA   | TRP | 177 | -6.596  | 13.311 | -8.453  | 0.00 | 0.00 | H |
| ATOM | 2809 | 2HB  | TRP | 177 | -6.204  | 13.213 | -5.999  | 0.00 | 0.00 | H |
| ATOM | 2810 | 3HB  | TRP | 177 | -5.309  | 11.713 | -6.207  | 0.00 | 0.00 | H |
| ATOM | 2811 | HD1  | TRP | 177 | -5.061  | 15.467 | -6.740  | 0.00 | 0.00 | H |
| ATOM | 2812 | HE1  | TRP | 177 | -2.644  | 16.158 | -7.108  | 0.00 | 0.00 | H |
| ATOM | 2813 | HE3  | TRP | 177 | -2.954  | 10.814 | -7.147  | 0.00 | 0.00 | H |
| ATOM | 2814 | HZ2  | TRP | 177 | -0.090  | 14.861 | -7.560  | 0.00 | 0.00 | H |
| ATOM | 2815 | HZ3  | TRP | 177 | -0.533  | 10.581 | -7.591  | 0.00 | 0.00 | H |
| ATOM | 2816 | HH2  | TRP | 177 | 0.904   | 12.594 | -7.818  | 0.00 | 0.00 | H |
| ATOM | 2817 | N    | ILE | 178 | -5.840  | 10.153 | -8.913  | 0.00 | 0.00 | N |
| ATOM | 2818 | CA   | ILE | 178 | -5.219  | 9.169  | -9.797  | 0.00 | 0.00 | C |
| ATOM | 2819 | C    | ILE | 178 | -6.060  | 9.010  | -11.082 | 0.00 | 0.00 | C |
| ATOM | 2820 | O    | ILE | 178 | -5.503  | 8.644  | -12.117 | 0.00 | 0.00 | O |
| ATOM | 2821 | CB   | ILE | 178 | -5.006  | 7.853  | -9.005  | 0.00 | 0.00 | C |
| ATOM | 2822 | CG1  | ILE | 178 | -4.020  | 8.060  | -7.831  | 0.00 | 0.00 | C |
| ATOM | 2823 | CG2  | ILE | 178 | -4.482  | 6.718  | -9.903  | 0.00 | 0.00 | C |
| ATOM | 2824 | CD1  | ILE | 178 | -4.045  | 6.914  | -6.813  | 0.00 | 0.00 | C |
| ATOM | 2825 | H    | ILE | 178 | -6.513  | 9.799  | -8.248  | 0.00 | 0.00 | H |
| ATOM | 2826 | HA   | ILE | 178 | -4.235  | 9.537  | -10.090 | 0.00 | 0.00 | H |
| ATOM | 2827 | HB   | ILE | 178 | -5.968  | 7.550  | -8.593  | 0.00 | 0.00 | H |
| ATOM | 2828 | 2HG1 | ILE | 178 | -3.005  | 8.184  | -8.211  | 0.00 | 0.00 | H |
| ATOM | 2829 | 3HG1 | ILE | 178 | -4.275  | 8.967  | -7.288  | 0.00 | 0.00 | H |
| ATOM | 2830 | 1HG2 | ILE | 178 | -5.212  | 6.478  | -10.673 | 0.00 | 0.00 | H |
| ATOM | 2831 | 2HG2 | ILE | 178 | -3.545  | 7.016  | -10.374 | 0.00 | 0.00 | H |
| ATOM | 2832 | 3HG2 | ILE | 178 | -4.315  | 5.816  | -9.321  | 0.00 | 0.00 | H |
| ATOM | 2833 | 1HD1 | ILE | 178 | -5.073  | 6.643  | -6.571  | 0.00 | 0.00 | H |
| ATOM | 2834 | 2HD1 | ILE | 178 | -3.517  | 6.048  | -7.208  | 0.00 | 0.00 | H |
| ATOM | 2835 | 3HD1 | ILE | 178 | -3.552  | 7.240  | -5.898  | 0.00 | 0.00 | H |
| ATOM | 2836 | N    | ALA | 179 | -7.364  | 9.341  | -11.045 | 0.00 | 0.00 | N |
| ATOM | 2837 | CA   | ALA | 179 | -8.243  | 9.394  | -12.215 | 0.00 | 0.00 | C |
| ATOM | 2838 | C    | ALA | 179 | -8.005  | 10.644 | -13.073 | 0.00 | 0.00 | C |
| ATOM | 2839 | O    | ALA | 179 | -8.294  | 10.619 | -14.269 | 0.00 | 0.00 | O |
| ATOM | 2840 | CB   | ALA | 179 | -9.702  | 9.342  | -11.751 | 0.00 | 0.00 | C |
| ATOM | 2841 | H    | ALA | 179 | -7.763  | 9.635  | -10.166 | 0.00 | 0.00 | H |
| ATOM | 2842 | HA   | ALA | 179 | -8.049  | 8.522  | -12.839 | 0.00 | 0.00 | H |
| ATOM | 2843 | 1HB  | ALA | 179 | -9.880  | 8.432  | -11.182 | 0.00 | 0.00 | H |
| ATOM | 2844 | 2HB  | ALA | 179 | -9.929  | 10.206 | -11.126 | 0.00 | 0.00 | H |
| ATOM | 2845 | 3HB  | ALA | 179 | -10.357 | 9.352  | -12.619 | 0.00 | 0.00 | H |
| ATOM | 2846 | N    | GLN | 180 | -7.436  | 11.705 | -12.478 | 0.00 | 0.00 | N |
| ATOM | 2847 | CA   | GLN | 180 | -6.906  | 12.875 | -13.177 | 0.00 | 0.00 | C |
| ATOM | 2848 | C    | GLN | 180 | -5.581  | 12.552 | -13.894 | 0.00 | 0.00 | C |
| ATOM | 2849 | O    | GLN | 180 | -5.069  | 13.395 | -14.630 | 0.00 | 0.00 | O |
| ATOM | 2850 | CB   | GLN | 180 | -6.691  | 13.998 | -12.147 | 0.00 | 0.00 | C |
| ATOM | 2851 | CG   | GLN | 180 | -8.008  | 14.587 | -11.615 | 0.00 | 0.00 | C |
| ATOM | 2852 | CD   | GLN | 180 | -7.835  | 15.405 | -10.328 | 0.00 | 0.00 | C |
| ATOM | 2853 | NE2  | GLN | 180 | -8.958  | 15.761 | -9.697  | 0.00 | 0.00 | N |
| ATOM | 2854 | OE1  | GLN | 180 | -6.723  | 15.711 | -9.901  | 0.00 | 0.00 | O |
| ATOM | 2855 | H    | GLN | 180 | -7.250  | 11.654 | -11.487 | 0.00 | 0.00 | H |
| ATOM | 2856 | HA   | GLN | 180 | -7.629  | 13.208 | -13.922 | 0.00 | 0.00 | H |
| ATOM | 2857 | 2HB  | GLN | 180 | -6.110  | 13.595 | -11.318 | 0.00 | 0.00 | H |
| ATOM | 2858 | 3HB  | GLN | 180 | -6.117  | 14.807 | -12.601 | 0.00 | 0.00 | H |
| ATOM | 2859 | 2HG  | GLN | 180 | -8.448  | 15.225 | -12.383 | 0.00 | 0.00 | H |
| ATOM | 2860 | 3HG  | GLN | 180 | -8.719  | 13.786 | -11.418 | 0.00 | 0.00 | H |
| ATOM | 2861 | 1HE2 | GLN | 180 | -8.906  | 16.300 | -8.845  | 0.00 | 0.00 | H |
| ATOM | 2862 | 2HE2 | GLN | 180 | -9.855  | 15.491 | -10.074 | 0.00 | 0.00 | H |
| ATOM | 2863 | N    | ARG | 181 | -5.024  | 11.351 | -13.661 | 0.00 | 0.00 | N |
| ATOM | 2864 | CA   | ARG | 181 | -3.701  | 10.911 | -14.095 | 0.00 | 0.00 | C |
| ATOM | 2865 | C    | ARG | 181 | -3.778  | 9.541  | -14.794 | 0.00 | 0.00 | C |
| ATOM | 2866 | O    | ARG | 181 | -2.818  | 8.776  | -14.744 | 0.00 | 0.00 | O |
| ATOM | 2867 | CB   | ARG | 181 | -2.739  | 10.938 | -12.889 | 0.00 | 0.00 | C |
| ATOM | 2868 | CG   | ARG | 181 | -2.444  | 12.379 | -12.447 | 0.00 | 0.00 | C |
| ATOM | 2869 | CD   | ARG | 181 | -1.674  | 12.433 | -11.126 | 0.00 | 0.00 | C |
| ATOM | 2870 | NE   | ARG | 181 | -1.247  | 13.806 | -10.810 | 0.00 | 0.00 | N |
| ATOM | 2871 | CZ   | ARG | 181 | -2.041  | 14.838 | -10.469 | 0.00 | 0.00 | C |
| ATOM | 2872 | NH1  | ARG | 181 | -1.486  | 16.034 | -10.241 | 0.00 | 0.00 | N |
| ATOM | 2873 | NH2  | ARG | 181 | -3.371  | 14.708 | -10.345 | 0.00 | 0.00 | N |
| ATOM | 2874 | H    | ARG | 181 | -5.522  | 10.710 | -13.061 | 0.00 | 0.00 | H |
| ATOM | 2875 | HA   | ARG | 181 | -3.325  | 11.612 | -14.840 | 0.00 | 0.00 | H |
| ATOM | 2876 | 2HB  | ARG | 181 | -3.180  | 10.380 | -12.061 | 0.00 | 0.00 | H |
| ATOM | 2877 | 3HB  | ARG | 181 | -1.791  | 10.471 | -13.158 | 0.00 | 0.00 | H |
| ATOM | 2878 | 2HG  | ARG | 181 | -1.860  | 12.871 | -13.227 | 0.00 | 0.00 | H |
| ATOM | 2879 | 3HG  | ARG | 181 | -3.378  | 12.923 | -12.319 | 0.00 | 0.00 | H |
| ATOM | 2880 | 2HD  | ARG | 181 | -2.296  | 12.048 | -10.319 | 0.00 | 0.00 | H |
| ATOM | 2881 | 3HD  | ARG | 181 | -0.789  | 11.802 | -11.205 | 0.00 | 0.00 | H |
| ATOM | 2882 | HE   | ARG | 181 | -0.255  | 13.984 | -10.872 | 0.00 | 0.00 | H |
| ATOM | 2883 | 1HH1 | ARG | 181 | -0.486  | 16.151 | -10.327 | 0.00 | 0.00 | H |
| ATOM | 2884 | 2HH1 | ARG | 181 | -2.066  | 16.819 | -9.982  | 0.00 | 0.00 | H |
| ATOM | 2885 | 1HH2 | ARG | 181 | -3.807  | 13.811 | -10.505 | 0.00 | 0.00 | H |
| ATOM | 2886 | 2HH2 | ARG | 181 | -3.936  | 15.504 | -10.083 | 0.00 | 0.00 | H |
| ATOM | 2887 | N    | GLY | 182 | -4.912  | 9.235  | -15.452 | 0.00 | 0.00 | N |
| ATOM | 2888 | CA   | GLY | 182 | -5.064  | 8.095  | -16.353 | 0.00 | 0.00 | C |
| ATOM | 2889 | C    | GLY | 182 | -5.020  | 6.734  | -15.653 | 0.00 | 0.00 | C |
| ATOM | 2890 | O    | GLY | 182 | -4.463  | 5.787  | -16.210 | 0.00 | 0.00 | O |
| ATOM | 2891 | H    | GLY | 182 | -5.677  | 9.894  | -15.427 | 0.00 | 0.00 | H |
| ATOM | 2892 | 2HA  | GLY | 182 | -6.025  | 8.190  | -16.856 | 0.00 | 0.00 | H |
| ATOM | 2893 | 3HA  | GLY | 182 | -4.279  | 8.136  | -17.109 | 0.00 | 0.00 | H |
| ATOM | 2894 | N    | GLY | 183 | -5.553  | 6.649  | -14.425 | 0.00 | 0.00 | N |
| ATOM | 2895 | CA   | GLY | 183 | -5.433  | 5.478  | -13.565 | 0.00 | 0.00 | C |
| ATOM | 2896 | C    | GLY | 183 | -4.020  | 5.337  | -12.994 | 0.00 | 0.00 | C |
| ATOM | 2897 | O    | GLY | 183 | -3.201  | 6.252  | -13.093 | 0.00 | 0.00 | O |
| ATOM | 2898 | H    | GLY | 183 | -5.996  | 7.465  | -14.026 | 0.00 | 0.00 | H |
| ATOM | 2899 | 2HA  | GLY | 183 | -6.140  | 5.569  | -12.740 | 0.00 | 0.00 | H |
| ATOM | 2900 | 3HA  | GLY | 183 | -5.686  | 4.581  | -14.133 | 0.00 | 0.00 | H |
| ATOM | 2901 | N    | TRP | 184 | -3.741  | 4.175  | -12.390 | 0.00 | 0.00 | N |
| ATOM | 2902 | CA   | TRP | 184 | -2.455  | 3.878  | -11.761 | 0.00 | 0.00 | C |
| ATOM | 2903 | C    | TRP | 184 | -1.336  | 3.614  | -12.786 | 0.00 | 0.00 | C |
| ATOM | 2904 | O    | TRP | 184 | -0.165  | 3.659  | -12.411 | 0.00 | 0.00 | O |
| ATOM | 2905 | CB   | TRP | 184 | -2.617  | 2.687  | -10.807 | 0.00 | 0.00 | C |
| ATOM | 2906 | CG   | TRP | 184 | -3.468  | 2.910  | -9.591  | 0.00 | 0.00 | C |
| ATOM | 2907 | CD1  | TRP | 184 | -4.814  | 3.015  | -9.573  | 0.00 | 0.00 | C |
| ATOM | 2908 | CD2  | TRP | 184 | -3.049  | 3.045  | -8.196  | 0.00 | 0.00 | C |
| ATOM | 2909 | CE2  | TRP | 184 | -4.210  | 3.231  | -7.388  | 0.00 | 0.00 | C |
| ATOM | 2910 | CE3  | TRP | 184 | -1.803  | 3.028  | -7.531  | 0.00 | 0.00 | C |

|      |      |      |     |     |        |        |         |      |      |   |
|------|------|------|-----|-----|--------|--------|---------|------|------|---|
| ATOM | 2911 | NE1  | TRP | 184 | -5.259 | 3.202  | -8.283  | 0.00 | 0.00 | N |
| ATOM | 2912 | CZ2  | TRP | 184 | -4.133 | 3.401  | -5.996  | 0.00 | 0.00 | C |
| ATOM | 2913 | CZ3  | TRP | 184 | -1.717 | 3.186  | -6.135  | 0.00 | 0.00 | C |
| ATOM | 2914 | CH2  | TRP | 184 | -2.878 | 3.378  | -5.369  | 0.00 | 0.00 | C |
| ATOM | 2915 | H    | TRP | 184 | -4.454 | 3.461  | -12.343 | 0.00 | 0.00 | H |
| ATOM | 2916 | HA   | TRP | 184 | -2.162 | 4.741  | -11.162 | 0.00 | 0.00 | H |
| ATOM | 2917 | ZHB  | TRP | 184 | -3.015 | 1.838  | -11.365 | 0.00 | 0.00 | H |
| ATOM | 2918 | 3HB  | TRP | 184 | -1.628 | 2.406  | -10.448 | 0.00 | 0.00 | H |
| ATOM | 2919 | HD1  | TRP | 184 | -5.448 | 2.968  | -10.445 | 0.00 | 0.00 | H |
| ATOM | 2920 | HE1  | TRP | 184 | -6.238 | 3.302  | -8.051  | 0.00 | 0.00 | H |
| ATOM | 2921 | HE3  | TRP | 184 | -0.901 | 2.872  | -8.100  | 0.00 | 0.00 | H |
| ATOM | 2922 | HZ2  | TRP | 184 | -5.027 | 3.557  | -5.415  | 0.00 | 0.00 | H |
| ATOM | 2923 | HZ3  | TRP | 184 | -0.751 | 3.162  | -5.651  | 0.00 | 0.00 | H |
| ATOM | 2924 | HH2  | TRP | 184 | -2.804 | 3.510  | -4.300  | 0.00 | 0.00 | H |
| ATOM | 2925 | N    | VAL | 185 | -1.679 | 3.367  | -14.062 | 0.00 | 0.00 | N |
| ATOM | 2926 | CA   | VAL | 185 | -0.729 | 3.095  | -15.142 | 0.00 | 0.00 | C |
| ATOM | 2927 | C    | VAL | 185 | 0.044  | 4.370  | -15.505 | 0.00 | 0.00 | C |
| ATOM | 2928 | O    | VAL | 185 | 1.270  | 4.324  | -15.601 | 0.00 | 0.00 | O |
| ATOM | 2929 | CB   | VAL | 185 | -1.478 | 2.511  | -16.367 | 0.00 | 0.00 | C |
| ATOM | 2930 | CG1  | VAL | 185 | -0.546 | 2.318  | -17.576 | 0.00 | 0.00 | C |
| ATOM | 2931 | CG2  | VAL | 185 | -2.127 | 1.152  | -16.054 | 0.00 | 0.00 | C |
| ATOM | 2932 | H    | VAL | 185 | -2.660 | 3.354  | -14.306 | 0.00 | 0.00 | H |
| ATOM | 2933 | HA   | VAL | 185 | -0.008 | 2.357  | -14.794 | 0.00 | 0.00 | H |
| ATOM | 2934 | HB   | VAL | 185 | -2.269 | 3.207  | -16.654 | 0.00 | 0.00 | H |
| ATOM | 2935 | 1HG1 | VAL | 185 | 0.296  | 1.681  | -17.303 | 0.00 | 0.00 | H |
| ATOM | 2936 | 2HG1 | VAL | 185 | -0.172 | 3.280  | -17.926 | 0.00 | 0.00 | H |
| ATOM | 2937 | 3HG1 | VAL | 185 | -1.095 | 1.851  | -18.395 | 0.00 | 0.00 | H |
| ATOM | 2938 | 1HG2 | VAL | 185 | -1.362 | 0.394  | -15.887 | 0.00 | 0.00 | H |
| ATOM | 2939 | 2HG2 | VAL | 185 | -2.751 | 0.842  | -16.893 | 0.00 | 0.00 | H |
| ATOM | 2940 | 3HG2 | VAL | 185 | -2.753 | 1.227  | -15.168 | 0.00 | 0.00 | H |
| ATOM | 2941 | N    | ALA | 186 | -0.668 | 5.492  | -15.689 | 0.00 | 0.00 | N |
| ATOM | 2942 | CA   | ALA | 186 | -0.089 | 6.771  | -16.087 | 0.00 | 0.00 | C |
| ATOM | 2943 | C    | ALA | 186 | 0.207  | 7.694  | -14.892 | 0.00 | 0.00 | C |
| ATOM | 2944 | O    | ALA | 186 | 0.824  | 8.742  | -15.085 | 0.00 | 0.00 | O |
| ATOM | 2945 | CB   | ALA | 186 | -0.985 | 7.417  | -17.149 | 0.00 | 0.00 | C |
| ATOM | 2946 | H    | ALA | 186 | -1.672 | 5.459  | -15.578 | 0.00 | 0.00 | H |
| ATOM | 2947 | HA   | ALA | 186 | 0.864  | 6.569  | -16.573 | 0.00 | 0.00 | H |
| ATOM | 2948 | 1HB  | ALA | 186 | -1.998 | 7.529  | -16.772 | 0.00 | 0.00 | H |
| ATOM | 2949 | 2HB  | ALA | 186 | -0.588 | 8.394  | -17.428 | 0.00 | 0.00 | H |
| ATOM | 2950 | 3HB  | ALA | 186 | -1.012 | 6.782  | -18.035 | 0.00 | 0.00 | H |
| ATOM | 2951 | N    | ALA | 187 | -0.176 | 7.296  | -13.667 | 0.00 | 0.00 | N |
| ATOM | 2952 | CA   | ALA | 187 | 0.266  | 7.931  | -12.427 | 0.00 | 0.00 | C |
| ATOM | 2953 | C    | ALA | 187 | 1.609  | 7.351  | -11.952 | 0.00 | 0.00 | C |
| ATOM | 2954 | O    | ALA | 187 | 2.340  | 8.039  | -11.242 | 0.00 | 0.00 | O |
| ATOM | 2955 | CB   | ALA | 187 | -0.819 | 7.775  | -11.359 | 0.00 | 0.00 | C |
| ATOM | 2956 | H    | ALA | 187 | -0.698 | 6.436  | -13.575 | 0.00 | 0.00 | H |
| ATOM | 2957 | HA   | ALA | 187 | 0.399  | 8.998  | -12.606 | 0.00 | 0.00 | H |
| ATOM | 2958 | 1HB  | ALA | 187 | -0.520 | 8.305  | -10.454 | 0.00 | 0.00 | H |
| ATOM | 2959 | 2HB  | ALA | 187 | -1.755 | 8.199  | -11.719 | 0.00 | 0.00 | H |
| ATOM | 2960 | 3HB  | ALA | 187 | -0.963 | 6.720  | -11.126 | 0.00 | 0.00 | H |
| ATOM | 2961 | N    | LEU | 188 | 1.950  | 6.123  | -12.381 | 0.00 | 0.00 | N |
| ATOM | 2962 | CA   | LEU | 188 | 3.281  | 5.539  | -12.239 | 0.00 | 0.00 | C |
| ATOM | 2963 | C    | LEU | 188 | 4.238  | 6.122  | -13.290 | 0.00 | 0.00 | C |
| ATOM | 2964 | O    | LEU | 188 | 5.421  | 6.293  | -12.997 | 0.00 | 0.00 | O |
| ATOM | 2965 | CB   | LEU | 188 | 3.162  | 4.007  | -12.355 | 0.00 | 0.00 | C |
| ATOM | 2966 | CG   | LEU | 188 | 4.503  | 3.241  | -12.310 | 0.00 | 0.00 | C |
| ATOM | 2967 | CD1  | LEU | 188 | 5.276  | 3.454  | -10.998 | 0.00 | 0.00 | C |
| ATOM | 2968 | CD2  | LEU | 188 | 4.247  | 1.743  | -12.518 | 0.00 | 0.00 | C |
| ATOM | 2969 | H    | LEU | 188 | 1.289  | 5.608  | -12.945 | 0.00 | 0.00 | H |
| ATOM | 2970 | HA   | LEU | 188 | 3.667  | 5.785  | -11.251 | 0.00 | 0.00 | H |
| ATOM | 2971 | ZHB  | LEU | 188 | 2.525  | 3.645  | -11.546 | 0.00 | 0.00 | H |
| ATOM | 2972 | 3HB  | LEU | 188 | 2.667  | 3.772  | -13.299 | 0.00 | 0.00 | H |
| ATOM | 2973 | HG   | LEU | 188 | 5.129  | 3.578  | -13.136 | 0.00 | 0.00 | H |
| ATOM | 2974 | 1HD1 | LEU | 188 | 4.669  | 3.143  | -10.150 | 0.00 | 0.00 | H |
| ATOM | 2975 | 2HD1 | LEU | 188 | 5.543  | 4.503  | -10.880 | 0.00 | 0.00 | H |
| ATOM | 2976 | 3HD1 | LEU | 188 | 6.194  | 2.865  | -11.012 | 0.00 | 0.00 | H |
| ATOM | 2977 | 1HD2 | LEU | 188 | 3.703  | 1.584  | -13.449 | 0.00 | 0.00 | H |
| ATOM | 2978 | 2HD2 | LEU | 188 | 3.673  | 1.335  | -11.687 | 0.00 | 0.00 | H |
| ATOM | 2979 | 3HD2 | LEU | 188 | 5.201  | 1.223  | -12.586 | 0.00 | 0.00 | H |
| ATOM | 2980 | N    | ASN | 189 | 3.723  | 6.468  | -14.482 | 0.00 | 0.00 | N |
| ATOM | 2981 | CA   | ASN | 189 | 4.485  | 7.142  | -15.531 | 0.00 | 0.00 | C |
| ATOM | 2982 | C    | ASN | 189 | 4.827  | 8.590  | -15.133 | 0.00 | 0.00 | C |
| ATOM | 2983 | O    | ASN | 189 | 5.809  | 9.139  | -15.632 | 0.00 | 0.00 | O |
| ATOM | 2984 | CB   | ASN | 189 | 3.669  | 7.092  | -16.834 | 0.00 | 0.00 | C |
| ATOM | 2985 | CG   | ASN | 189 | 4.455  | 7.470  | -18.094 | 0.00 | 0.00 | C |
| ATOM | 2986 | ND2  | ASN | 189 | 3.732  | 7.802  | -19.167 | 0.00 | 0.00 | N |
| ATOM | 2987 | OD1  | ASN | 189 | 5.685  | 7.446  | -18.119 | 0.00 | 0.00 | O |
| ATOM | 2988 | H    | ASN | 189 | 2.744  | 6.305  | -14.660 | 0.00 | 0.00 | H |
| ATOM | 2989 | HA   | ASN | 189 | 5.413  | 6.587  | -15.678 | 0.00 | 0.00 | H |
| ATOM | 2990 | ZHB  | ASN | 189 | 3.283  | 6.082  | -16.977 | 0.00 | 0.00 | H |
| ATOM | 2991 | 3HB  | ASN | 189 | 2.816  | 7.765  | -16.738 | 0.00 | 0.00 | H |
| ATOM | 2992 | 1HD2 | ASN | 189 | 4.196  | 8.052  | -20.028 | 0.00 | 0.00 | H |
| ATOM | 2993 | 2HD2 | ASN | 189 | 2.724  | 7.803  | -19.114 | 0.00 | 0.00 | H |
| ATOM | 2994 | N    | LEU | 190 | 4.053  | 9.184  | -14.208 | 0.00 | 0.00 | N |
| ATOM | 2995 | CA   | LEU | 190 | 4.328  | 10.478 | -13.603 | 0.00 | 0.00 | C |
| ATOM | 2996 | C    | LEU | 190 | 5.362  | 10.305 | -12.488 | 0.00 | 0.00 | C |
| ATOM | 2997 | O    | LEU | 190 | 5.147  | 9.570  | -11.525 | 0.00 | 0.00 | O |
| ATOM | 2998 | CB   | LEU | 190 | 3.012  | 11.097 | -13.100 | 0.00 | 0.00 | C |
| ATOM | 2999 | CG   | LEU | 190 | 3.169  | 12.508 | -12.492 | 0.00 | 0.00 | C |
| ATOM | 3000 | CD1  | LEU | 190 | 3.618  | 13.547 | -13.531 | 0.00 | 0.00 | C |
| ATOM | 3001 | CD2  | LEU | 190 | 1.836  | 12.946 | -11.873 | 0.00 | 0.00 | C |
| ATOM | 3002 | H    | LEU | 190 | 3.261  | 8.674  | -13.844 | 0.00 | 0.00 | H |
| ATOM | 3003 | HA   | LEU | 190 | 4.752  | 11.131 | -14.367 | 0.00 | 0.00 | H |
| ATOM | 3004 | ZHB  | LEU | 190 | 2.307  | 11.149 | -13.932 | 0.00 | 0.00 | H |
| ATOM | 3005 | 3HB  | LEU | 190 | 2.586  | 10.438 | -12.345 | 0.00 | 0.00 | H |
| ATOM | 3006 | HG   | LEU | 190 | 3.910  | 12.474 | -11.693 | 0.00 | 0.00 | H |
| ATOM | 3007 | 1HD1 | LEU | 190 | 4.613  | 13.305 | -13.904 | 0.00 | 0.00 | H |
| ATOM | 3008 | 2HD1 | LEU | 190 | 3.657  | 14.535 | -13.072 | 0.00 | 0.00 | H |
| ATOM | 3009 | 3HD1 | LEU | 190 | 2.916  | 13.571 | -14.366 | 0.00 | 0.00 | H |
| ATOM | 3010 | 1HD2 | LEU | 190 | 1.940  | 13.935 | -11.426 | 0.00 | 0.00 | H |
| ATOM | 3011 | 2HD2 | LEU | 190 | 1.545  | 12.242 | -11.092 | 0.00 | 0.00 | H |
| ATOM | 3012 | 3HD2 | LEU | 190 | 1.059  | 12.978 | -12.638 | 0.00 | 0.00 | H |

END

DATASET 53

HEADER APOPTOSIS 28-JUN-10 XXXX  
 COMPND MOLECULE: APOPTOSIS REGULATOR BAK;  
 COMPND 2 SYNONYM: BCL-2 HOMOLOGOUS ANTAGONIST/KILLER, BCL-2- LIKE 7  
 COMPND 3 PROTEIN;  
 SOURCE MOLECULE 1 (RESIDUES 1-27): NOXA;  
 SOURCE 2 NCBI ACCESSION: Q13794;  
 SOURCE 3 ORGANISM\_SCIENTIFIC: HOMO SAPIENS;  
 SOURCE 4 ORGANISM\_COMMON: HUMAN;  
 SOURCE 5 MOLECULE 2 (RESIDUES 28-190): BAK;  
 SOURCE 6 NCBI ACCESSION: Q16611;  
 SOURCE 7 ORGANISM\_SCIENTIFIC: HOMO SAPIENS;  
 SOURCE 8 ORGANISM\_COMMON: HUMAN;  
 KEYWDS HETERODIMER, APOPTOSIS  
 EXPDTA THEORETICAL MODEL  
 JRNL AUTH Y-P PANG, H DAI, A SMITH, XM MENG, PA SCHNEIDER, SH KAUFMANN  
 JRNL TITL BAK CONFORMATIONAL CHANGES INDUCED BY LIGAND BINDING:  
 JRNL TITL 2 INSIGHT INTO BH3 DOMAIN BINDING AND BAK HOMO-OLIGOMERIZATION  
 JRNL REF SCIENTIFIC REPORTS, SUBMITTED  
 REMARK 220 THIS IS AN INSTANTANEOUS STRUCTURE CLOSEST TO THE  
 REMARK 220 AVERAGE OF 5100 SIMILAR CONFORMERS IDENTIFIED BY  
 REMARK 220 CLUSTER ANALYSIS OF 52 10-NS MOLECULAR  
 REMARK 220 DYNAMICS SIMULATIONS OF BAK\*NOXA USING PMEMD WITH  
 REMARK 220 THE FF99SB FORCE FIELD. NOTE: THIS STRUCTURE  
 REMARK 220 CONTAINS WATERS.  
 MOL 1  
 ATOM 1 N ALA 1 1.961 16.863 18.953 0.00 0.00 N  
 ATOM 2 CA ALA 1 0.710 16.152 18.623 0.00 0.00 C  
 ATOM 3 C ALA 1 0.665 14.676 19.174 0.00 0.00 C  
 ATOM 4 O ALA 1 1.638 14.166 19.682 0.00 0.00 O  
 ATOM 5 CB ALA 1 0.570 16.138 17.030 0.00 0.00 C  
 ATOM 6 H ALA 1 2.715 16.261 19.253 0.00 0.00 H  
 ATOM 7 HA ALA 1 -0.155 16.634 19.077 0.00 0.00 H  
 ATOM 8 HB1 ALA 1 -0.464 16.202 16.687 0.00 0.00 H  
 ATOM 9 HB2 ALA 1 1.006 15.181 16.746 0.00 0.00 H  
 ATOM 10 HB3 ALA 1 1.042 17.043 16.646 0.00 0.00 H  
 ATOM 11 N GLU 2 -0.504 14.022 19.137 0.00 0.00 N  
 ATOM 12 CA GLU 2 -0.649 12.711 19.714 0.00 0.00 C  
 ATOM 13 C GLU 2 -0.006 11.607 18.800 0.00 0.00 C  
 ATOM 14 O GLU 2 0.180 11.759 17.575 0.00 0.00 O  
 ATOM 15 CB GLU 2 -2.105 12.256 19.919 0.00 0.00 C  
 ATOM 16 CG GLU 2 -2.928 13.158 20.813 0.00 0.00 C  
 ATOM 17 CD GLU 2 -2.361 13.141 22.235 0.00 0.00 C  
 ATOM 18 OE1 GLU 2 -1.817 14.155 22.655 0.00 0.00 O  
 ATOM 19 OE2 GLU 2 -2.276 12.027 22.792 0.00 0.00 O  
 ATOM 20 H GLU 2 -1.248 14.529 18.679 0.00 0.00 H  
 ATOM 21 HA GLU 2 -0.175 12.593 20.688 0.00 0.00 H  
 ATOM 22 HB2 GLU 2 -2.080 11.226 20.272 0.00 0.00 H  
 ATOM 23 HB3 GLU 2 -2.545 12.176 18.924 0.00 0.00 H  
 ATOM 24 HG2 GLU 2 -2.969 14.200 20.496 0.00 0.00 H  
 ATOM 25 HG3 GLU 2 -3.958 12.837 20.660 0.00 0.00 H  
 ATOM 26 N LEU 3 0.230 10.421 19.316 0.00 0.00 N  
 ATOM 27 CA LEU 3 1.245 9.569 18.601 0.00 0.00 C  
 ATOM 28 C LEU 3 0.642 8.878 17.336 0.00 0.00 C  
 ATOM 29 O LEU 3 1.353 8.574 16.396 0.00 0.00 O  
 ATOM 30 CB LEU 3 1.735 8.606 19.701 0.00 0.00 C  
 ATOM 31 CG LEU 3 2.766 7.518 19.304 0.00 0.00 C  
 ATOM 32 CD1 LEU 3 4.164 8.083 18.831 0.00 0.00 C  
 ATOM 33 CD2 LEU 3 2.944 6.497 20.441 0.00 0.00 C  
 ATOM 34 H LEU 3 0.177 10.342 20.321 0.00 0.00 H  
 ATOM 35 HA LEU 3 2.057 10.165 18.185 0.00 0.00 H  
 ATOM 36 HB2 LEU 3 2.222 9.178 20.491 0.00 0.00 H  
 ATOM 37 HB3 LEU 3 0.796 8.168 20.042 0.00 0.00 H  
 ATOM 38 HG LEU 3 2.313 7.044 18.433 0.00 0.00 H  
 ATOM 39 1HD1 LEU 3 4.103 8.711 17.941 0.00 0.00 H  
 ATOM 40 2HD1 LEU 3 4.866 7.282 18.599 0.00 0.00 H  
 ATOM 41 3HD1 LEU 3 4.604 8.769 19.555 0.00 0.00 H  
 ATOM 42 1HD2 LEU 3 3.743 5.771 20.289 0.00 0.00 H  
 ATOM 43 2HD2 LEU 3 3.151 7.007 21.382 0.00 0.00 H  
 ATOM 44 3HD2 LEU 3 2.023 5.944 20.627 0.00 0.00 H  
 ATOM 45 N GLU 4 -0.599 8.985 17.173 0.00 0.00 N  
 ATOM 46 CA GLU 4 -1.359 8.639 16.002 0.00 0.00 C  
 ATOM 47 C GLU 4 -1.255 9.733 14.888 0.00 0.00 C  
 ATOM 48 O GLU 4 -1.564 9.464 13.729 0.00 0.00 O  
 ATOM 49 CB GLU 4 -2.830 8.335 16.358 0.00 0.00 C  
 ATOM 50 CG GLU 4 -3.661 9.572 16.870 0.00 0.00 C  
 ATOM 51 CD GLU 4 -5.134 9.291 17.214 0.00 0.00 C  
 ATOM 52 OE1 GLU 4 -5.353 8.305 18.012 0.00 0.00 O  
 ATOM 53 OE2 GLU 4 -5.995 10.075 16.833 0.00 0.00 O  
 ATOM 54 H GLU 4 -1.136 9.353 17.946 0.00 0.00 H  
 ATOM 55 HA GLU 4 -1.013 7.667 15.650 0.00 0.00 H  
 ATOM 56 HB2 GLU 4 -3.299 7.970 15.445 0.00 0.00 H  
 ATOM 57 HB3 GLU 4 -2.872 7.528 17.090 0.00 0.00 H  
 ATOM 58 HG2 GLU 4 -3.194 10.058 17.728 0.00 0.00 H  
 ATOM 59 HG3 GLU 4 -3.554 10.256 16.028 0.00 0.00 H  
 ATOM 60 N VAL 5 -0.935 10.924 15.231 0.00 0.00 N  
 ATOM 61 CA VAL 5 -0.682 12.065 14.321 0.00 0.00 C  
 ATOM 62 C VAL 5 0.811 12.187 14.088 0.00 0.00 C  
 ATOM 63 O VAL 5 1.275 12.320 12.955 0.00 0.00 O  
 ATOM 64 CB VAL 5 -1.313 13.400 14.747 0.00 0.00 C  
 ATOM 65 CG1 VAL 5 -1.625 14.281 13.520 0.00 0.00 C  
 ATOM 66 CG2 VAL 5 -2.622 13.184 15.402 0.00 0.00 C  
 ATOM 67 H VAL 5 -0.600 11.041 16.177 0.00 0.00 H  
 ATOM 68 HA VAL 5 -1.100 11.834 13.342 0.00 0.00 H  
 ATOM 69 HB VAL 5 -0.617 13.984 15.349 0.00 0.00 H  
 ATOM 70 1HG1 VAL 5 -0.846 14.557 12.810 0.00 0.00 H  
 ATOM 71 2HG1 VAL 5 -2.365 13.726 12.941 0.00 0.00 H  
 ATOM 72 3HG1 VAL 5 -2.128 15.176 13.888 0.00 0.00 H  
 ATOM 73 1HG2 VAL 5 -3.009 14.180 15.621 0.00 0.00 H  
 ATOM 74 2HG2 VAL 5 -3.316 12.615 14.783 0.00 0.00 H  
 ATOM 75 3HG2 VAL 5 -2.509 12.663 16.353 0.00 0.00 H  
 ATOM 76 N GLU 6 1.629 11.909 15.104 0.00 0.00 N  
 ATOM 77 CA GLU 6 3.099 11.812 14.907 0.00 0.00 C  
 ATOM 78 C GLU 6 3.382 10.717 13.829 0.00 0.00 C  
 ATOM 79 O GLU 6 4.057 10.948 12.766 0.00 0.00 O  
 ATOM 80 CB GLU 6 3.698 11.550 16.249 0.00 0.00 C

|      |     |      |     |    |        |        |        |      |      |   |
|------|-----|------|-----|----|--------|--------|--------|------|------|---|
| ATOM | 81  | CG   | GLU | 6  | 5.174  | 11.827 | 16.290 | 0.00 | 0.00 | C |
| ATOM | 82  | CD   | GLU | 6  | 5.795  | 11.538 | 17.675 | 0.00 | 0.00 | C |
| ATOM | 83  | OE1  | GLU | 6  | 6.401  | 10.413 | 17.852 | 0.00 | 0.00 | O |
| ATOM | 84  | OE2  | GLU | 6  | 5.441  | 12.273 | 18.619 | 0.00 | 0.00 | O |
| ATOM | 85  | H    | GLU | 6  | 1.157  | 11.702 | 15.973 | 0.00 | 0.00 | H |
| ATOM | 86  | HA   | GLU | 6  | 3.535  | 12.744 | 14.547 | 0.00 | 0.00 | H |
| ATOM | 87  | HB2  | GLU | 6  | 3.223  | 12.151 | 17.025 | 0.00 | 0.00 | H |
| ATOM | 88  | HB3  | GLU | 6  | 3.601  | 10.492 | 16.496 | 0.00 | 0.00 | H |
| ATOM | 89  | HG2  | GLU | 6  | 5.718  | 11.187 | 15.597 | 0.00 | 0.00 | H |
| ATOM | 90  | HG3  | GLU | 6  | 5.453  | 12.828 | 15.961 | 0.00 | 0.00 | H |
| ATOM | 91  | N    | CYS | 7  | 2.809  | 9.479  | 14.053 | 0.00 | 0.00 | N |
| ATOM | 92  | CA   | CYS | 7  | 2.955  | 8.420  | 13.143 | 0.00 | 0.00 | C |
| ATOM | 93  | C    | CYS | 7  | 2.423  | 8.678  | 11.727 | 0.00 | 0.00 | C |
| ATOM | 94  | O    | CYS | 7  | 2.921  | 8.162  | 10.741 | 0.00 | 0.00 | O |
| ATOM | 95  | CB   | CYS | 7  | 2.374  | 7.126  | 13.672 | 0.00 | 0.00 | C |
| ATOM | 96  | SG   | CYS | 7  | 3.668  | 6.407  | 14.791 | 0.00 | 0.00 | S |
| ATOM | 97  | H    | CYS | 7  | 2.266  | 9.329  | 14.890 | 0.00 | 0.00 | H |
| ATOM | 98  | HA   | CYS | 7  | 4.000  | 8.137  | 13.021 | 0.00 | 0.00 | H |
| ATOM | 99  | HB2  | CYS | 7  | 1.421  | 7.405  | 14.119 | 0.00 | 0.00 | H |
| ATOM | 100 | HB3  | CYS | 7  | 2.258  | 6.449  | 12.826 | 0.00 | 0.00 | H |
| ATOM | 101 | HG   | CYS | 7  | 3.907  | 7.538  | 15.461 | 0.00 | 0.00 | H |
| ATOM | 102 | N    | ALA | 8  | 1.410  | 9.564  | 11.592 | 0.00 | 0.00 | N |
| ATOM | 103 | CA   | ALA | 8  | 0.981  | 10.204 | 10.372 | 0.00 | 0.00 | C |
| ATOM | 104 | C    | ALA | 8  | 2.044  | 11.143 | 9.756  | 0.00 | 0.00 | C |
| ATOM | 105 | O    | ALA | 8  | 2.419  | 10.938 | 8.574  | 0.00 | 0.00 | O |
| ATOM | 106 | CB   | ALA | 8  | -0.392 | 10.753 | 10.599 | 0.00 | 0.00 | C |
| ATOM | 107 | H    | ALA | 8  | 1.023  | 9.853  | 12.478 | 0.00 | 0.00 | H |
| ATOM | 108 | HA   | ALA | 8  | 0.844  | 9.285  | 9.802  | 0.00 | 0.00 | H |
| ATOM | 109 | HB1  | ALA | 8  | -0.801 | 11.093 | 9.647  | 0.00 | 0.00 | H |
| ATOM | 110 | HB2  | ALA | 8  | -1.062 | 9.931  | 10.851 | 0.00 | 0.00 | H |
| ATOM | 111 | HB3  | ALA | 8  | -0.414 | 11.534 | 11.359 | 0.00 | 0.00 | H |
| ATOM | 112 | N    | THR | 9  | 2.645  | 11.989 | 10.532 | 0.00 | 0.00 | N |
| ATOM | 113 | CA   | THR | 9  | 3.702  | 12.895 | 10.085 | 0.00 | 0.00 | C |
| ATOM | 114 | C    | THR | 9  | 4.904  | 12.062 | 9.616  | 0.00 | 0.00 | C |
| ATOM | 115 | O    | THR | 9  | 5.502  | 12.253 | 8.517  | 0.00 | 0.00 | O |
| ATOM | 116 | CB   | THR | 9  | 4.053  | 13.949 | 11.206 | 0.00 | 0.00 | C |
| ATOM | 117 | CG2  | THR | 9  | 4.877  | 15.178 | 10.680 | 0.00 | 0.00 | C |
| ATOM | 118 | OG1  | THR | 9  | 2.919  | 14.572 | 11.835 | 0.00 | 0.00 | O |
| ATOM | 119 | H    | THR | 9  | 2.250  | 12.135 | 11.451 | 0.00 | 0.00 | H |
| ATOM | 120 | HA   | THR | 9  | 3.295  | 13.473 | 9.254  | 0.00 | 0.00 | H |
| ATOM | 121 | HB   | THR | 9  | 4.712  | 13.405 | 11.884 | 0.00 | 0.00 | H |
| ATOM | 122 | HG1  | THR | 9  | 2.105  | 14.220 | 11.469 | 0.00 | 0.00 | H |
| ATOM | 123 | 1HG2 | THR | 9  | 4.199  | 15.904 | 10.232 | 0.00 | 0.00 | H |
| ATOM | 124 | 2HG2 | THR | 9  | 5.638  | 14.995 | 9.921  | 0.00 | 0.00 | H |
| ATOM | 125 | 3HG2 | THR | 9  | 5.350  | 15.628 | 11.553 | 0.00 | 0.00 | H |
| ATOM | 126 | N    | GLN | 10 | 5.116  | 10.897 | 10.248 | 0.00 | 0.00 | N |
| ATOM | 127 | CA   | GLN | 10 | 6.150  | 9.904  | 9.881  | 0.00 | 0.00 | C |
| ATOM | 128 | C    | GLN | 10 | 5.950  | 9.299  | 8.405  | 0.00 | 0.00 | C |
| ATOM | 129 | O    | GLN | 10 | 6.891  | 9.276  | 7.599  | 0.00 | 0.00 | O |
| ATOM | 130 | CB   | GLN | 10 | 6.282  | 8.735  | 10.933 | 0.00 | 0.00 | C |
| ATOM | 131 | CG   | GLN | 10 | 7.415  | 7.788  | 10.454 | 0.00 | 0.00 | C |
| ATOM | 132 | CD   | GLN | 10 | 7.751  | 6.812  | 11.496 | 0.00 | 0.00 | C |
| ATOM | 133 | NE2  | GLN | 10 | 7.496  | 5.581  | 11.378 | 0.00 | 0.00 | N |
| ATOM | 134 | OE1  | GLN | 10 | 8.307  | 7.206  | 12.532 | 0.00 | 0.00 | O |
| ATOM | 135 | H    | GLN | 10 | 4.508  | 10.812 | 11.048 | 0.00 | 0.00 | H |
| ATOM | 136 | HA   | GLN | 10 | 7.082  | 10.466 | 9.886  | 0.00 | 0.00 | H |
| ATOM | 137 | HB2  | GLN | 10 | 6.513  | 9.112  | 11.930 | 0.00 | 0.00 | H |
| ATOM | 138 | HB3  | GLN | 10 | 5.344  | 8.186  | 11.007 | 0.00 | 0.00 | H |
| ATOM | 139 | HG2  | GLN | 10 | 7.188  | 7.231  | 9.545  | 0.00 | 0.00 | H |
| ATOM | 140 | HG3  | GLN | 10 | 8.338  | 8.327  | 10.239 | 0.00 | 0.00 | H |
| ATOM | 141 | 1HE2 | GLN | 10 | 7.405  | 5.232  | 10.434 | 0.00 | 0.00 | H |
| ATOM | 142 | 2HE2 | GLN | 10 | 7.708  | 4.932  | 12.120 | 0.00 | 0.00 | H |
| ATOM | 143 | N    | LEU | 11 | 4.733  | 8.871  | 8.084  | 0.00 | 0.00 | N |
| ATOM | 144 | CA   | LEU | 11 | 4.266  | 8.327  | 6.797  | 0.00 | 0.00 | C |
| ATOM | 145 | C    | LEU | 11 | 4.056  | 9.427  | 5.773  | 0.00 | 0.00 | C |
| ATOM | 146 | O    | LEU | 11 | 4.184  | 9.196  | 4.582  | 0.00 | 0.00 | O |
| ATOM | 147 | CB   | LEU | 11 | 3.002  | 7.533  | 7.094  | 0.00 | 0.00 | C |
| ATOM | 148 | CG   | LEU | 11 | 2.596  | 6.711  | 5.868  | 0.00 | 0.00 | C |
| ATOM | 149 | CD1  | LEU | 11 | 3.639  | 5.605  | 5.584  | 0.00 | 0.00 | C |
| ATOM | 150 | CD2  | LEU | 11 | 1.316  | 5.991  | 5.973  | 0.00 | 0.00 | C |
| ATOM | 151 | H    | LEU | 11 | 4.102  | 8.924  | 8.871  | 0.00 | 0.00 | H |
| ATOM | 152 | HA   | LEU | 11 | 5.124  | 7.744  | 6.464  | 0.00 | 0.00 | H |
| ATOM | 153 | HB2  | LEU | 11 | 3.088  | 6.863  | 7.948  | 0.00 | 0.00 | H |
| ATOM | 154 | HB3  | LEU | 11 | 2.131  | 8.061  | 7.481  | 0.00 | 0.00 | H |
| ATOM | 155 | HG   | LEU | 11 | 2.630  | 7.261  | 4.926  | 0.00 | 0.00 | H |
| ATOM | 156 | 1HD1 | LEU | 11 | 3.277  | 4.910  | 4.824  | 0.00 | 0.00 | H |
| ATOM | 157 | 2HD1 | LEU | 11 | 3.873  | 5.111  | 6.527  | 0.00 | 0.00 | H |
| ATOM | 158 | 3HD1 | LEU | 11 | 4.515  | 6.172  | 5.271  | 0.00 | 0.00 | H |
| ATOM | 159 | 1HD2 | LEU | 11 | 1.383  | 5.399  | 6.887  | 0.00 | 0.00 | H |
| ATOM | 160 | 2HD2 | LEU | 11 | 0.502  | 6.714  | 5.942  | 0.00 | 0.00 | H |
| ATOM | 161 | 3HD2 | LEU | 11 | 1.209  | 5.317  | 5.123  | 0.00 | 0.00 | H |
| ATOM | 162 | N    | ARG | 12 | 3.968  | 10.715 | 6.228  | 0.00 | 0.00 | N |
| ATOM | 163 | CA   | ARG | 12 | 3.880  | 11.890 | 5.407  | 0.00 | 0.00 | C |
| ATOM | 164 | C    | ARG | 12 | 5.191  | 12.390 | 4.914  | 0.00 | 0.00 | C |
| ATOM | 165 | O    | ARG | 12 | 5.299  | 12.779 | 3.746  | 0.00 | 0.00 | O |
| ATOM | 166 | CB   | ARG | 12 | 3.134  | 12.933 | 6.138  | 0.00 | 0.00 | C |
| ATOM | 167 | CG   | ARG | 12 | 2.756  | 14.103 | 5.208  | 0.00 | 0.00 | C |
| ATOM | 168 | CD   | ARG | 12 | 2.050  | 15.244 | 5.960  | 0.00 | 0.00 | C |
| ATOM | 169 | NE   | ARG | 12 | 3.080  | 16.171 | 6.434  | 0.00 | 0.00 | N |
| ATOM | 170 | CZ   | ARG | 12 | 3.006  | 17.057 | 7.381  | 0.00 | 0.00 | C |
| ATOM | 171 | NH1  | ARG | 12 | 1.887  | 17.549 | 7.823  | 0.00 | 0.00 | N |
| ATOM | 172 | NH2  | ARG | 12 | 4.086  | 17.422 | 8.008  | 0.00 | 0.00 | N |
| ATOM | 173 | H    | ARG | 12 | 3.841  | 10.860 | 7.219  | 0.00 | 0.00 | H |
| ATOM | 174 | HA   | ARG | 12 | 3.293  | 11.559 | 4.550  | 0.00 | 0.00 | H |
| ATOM | 175 | HB2  | ARG | 12 | 2.270  | 12.412 | 6.548  | 0.00 | 0.00 | H |
| ATOM | 176 | HB3  | ARG | 12 | 3.715  | 13.367 | 6.951  | 0.00 | 0.00 | H |
| ATOM | 177 | HG2  | ARG | 12 | 3.658  | 14.496 | 4.742  | 0.00 | 0.00 | H |
| ATOM | 178 | HG3  | ARG | 12 | 2.147  | 13.743 | 4.377  | 0.00 | 0.00 | H |
| ATOM | 179 | HD2  | ARG | 12 | 1.425  | 15.758 | 5.232  | 0.00 | 0.00 | H |
| ATOM | 180 | HD3  | ARG | 12 | 1.352  | 14.967 | 6.750  | 0.00 | 0.00 | H |
| ATOM | 181 | HE   | ARG | 12 | 4.028  | 15.983 | 6.143  | 0.00 | 0.00 | H |
| ATOM | 182 | 1HH1 | ARG | 12 | 1.082  | 17.596 | 7.214  | 0.00 | 0.00 | H |
| ATOM | 183 | 2HH1 | ARG | 12 | 2.035  | 18.132 | 8.635  | 0.00 | 0.00 | H |
| ATOM | 184 | 1HH2 | ARG | 12 | 4.992  | 17.135 | 7.667  | 0.00 | 0.00 | H |
| ATOM | 185 | 2HH2 | ARG | 12 | 4.135  | 18.216 | 8.631  | 0.00 | 0.00 | H |

|      |     |      |     |    |        |        |        |      |      |   |
|------|-----|------|-----|----|--------|--------|--------|------|------|---|
| ATOM | 186 | N    | ARG | 13 | 6.227  | 12.365 | 5.808  | 0.00 | 0.00 | N |
| ATOM | 187 | CA   | ARG | 13 | 7.654  | 12.792 | 5.519  | 0.00 | 0.00 | C |
| ATOM | 188 | C    | ARG | 13 | 8.397  | 11.638 | 4.864  | 0.00 | 0.00 | C |
| ATOM | 189 | O    | ARG | 13 | 9.303  | 11.957 | 4.082  | 0.00 | 0.00 | O |
| ATOM | 190 | CB   | ARG | 13 | 8.295  | 13.475 | 6.781  | 0.00 | 0.00 | C |
| ATOM | 191 | CG   | ARG | 13 | 8.996  | 12.413 | 7.698  | 0.00 | 0.00 | C |
| ATOM | 192 | CD   | ARG | 13 | 9.599  | 12.961 | 8.952  | 0.00 | 0.00 | C |
| ATOM | 193 | NE   | ARG | 13 | 9.859  | 11.853 | 9.917  | 0.00 | 0.00 | N |
| ATOM | 194 | CZ   | ARG | 13 | 9.162  | 11.617 | 11.054 | 0.00 | 0.00 | C |
| ATOM | 195 | NH1  | ARG | 13 | 8.288  | 12.371 | 11.632 | 0.00 | 0.00 | N |
| ATOM | 196 | NH2  | ARG | 13 | 9.511  | 10.529 | 11.641 | 0.00 | 0.00 | N |
| ATOM | 197 | H    | ARG | 13 | 6.005  | 12.294 | 6.791  | 0.00 | 0.00 | H |
| ATOM | 198 | HA   | ARG | 13 | 7.506  | 13.569 | 4.769  | 0.00 | 0.00 | H |
| ATOM | 199 | HB2  | ARG | 13 | 9.013  | 14.246 | 6.507  | 0.00 | 0.00 | H |
| ATOM | 200 | HB3  | ARG | 13 | 7.541  | 13.905 | 7.442  | 0.00 | 0.00 | H |
| ATOM | 201 | HG2  | ARG | 13 | 8.327  | 11.568 | 7.858  | 0.00 | 0.00 | H |
| ATOM | 202 | HG3  | ARG | 13 | 9.788  | 11.936 | 7.119  | 0.00 | 0.00 | H |
| ATOM | 203 | HD2  | ARG | 13 | 10.500 | 13.504 | 8.663  | 0.00 | 0.00 | H |
| ATOM | 204 | HD3  | ARG | 13 | 8.871  | 13.620 | 9.426  | 0.00 | 0.00 | H |
| ATOM | 205 | HE   | ARG | 13 | 10.608 | 11.232 | 9.647  | 0.00 | 0.00 | H |
| ATOM | 206 | 1HH1 | ARG | 13 | 8.305  | 13.353 | 11.394 | 0.00 | 0.00 | H |
| ATOM | 207 | 2HH1 | ARG | 13 | 8.064  | 12.141 | 12.589 | 0.00 | 0.00 | H |
| ATOM | 208 | 1HH2 | ARG | 13 | 10.253 | 9.938  | 11.291 | 0.00 | 0.00 | H |
| ATOM | 209 | 2HH2 | ARG | 13 | 8.880  | 10.095 | 12.299 | 0.00 | 0.00 | H |
| ATOM | 210 | N    | PHE | 14 | 7.963  | 10.348 | 4.992  | 0.00 | 0.00 | N |
| ATOM | 211 | CA   | PHE | 14 | 8.276  | 9.305  | 4.035  | 0.00 | 0.00 | C |
| ATOM | 212 | C    | PHE | 14 | 7.588  | 9.529  | 2.679  | 0.00 | 0.00 | C |
| ATOM | 213 | O    | PHE | 14 | 8.179  | 9.148  | 1.691  | 0.00 | 0.00 | O |
| ATOM | 214 | CB   | PHE | 14 | 7.948  | 7.953  | 4.576  | 0.00 | 0.00 | C |
| ATOM | 215 | CG   | PHE | 14 | 8.343  | 6.782  | 3.765  | 0.00 | 0.00 | C |
| ATOM | 216 | CD1  | PHE | 14 | 9.703  | 6.493  | 3.530  | 0.00 | 0.00 | C |
| ATOM | 217 | CD2  | PHE | 14 | 7.373  | 5.895  | 3.261  | 0.00 | 0.00 | C |
| ATOM | 218 | CE1  | PHE | 14 | 10.042 | 5.526  | 2.518  | 0.00 | 0.00 | C |
| ATOM | 219 | CE2  | PHE | 14 | 7.656  | 4.943  | 2.362  | 0.00 | 0.00 | C |
| ATOM | 220 | CZ   | PHE | 14 | 9.011  | 4.765  | 1.961  | 0.00 | 0.00 | C |
| ATOM | 221 | H    | PHE | 14 | 7.257  | 10.139 | 5.683  | 0.00 | 0.00 | H |
| ATOM | 222 | HA   | PHE | 14 | 9.335  | 9.292  | 3.781  | 0.00 | 0.00 | H |
| ATOM | 223 | HB2  | PHE | 14 | 8.481  | 7.889  | 5.524  | 0.00 | 0.00 | H |
| ATOM | 224 | HB3  | PHE | 14 | 6.886  | 7.815  | 4.774  | 0.00 | 0.00 | H |
| ATOM | 225 | HD1  | PHE | 14 | 10.440 | 7.090  | 4.048  | 0.00 | 0.00 | H |
| ATOM | 226 | HD2  | PHE | 14 | 6.347  | 6.042  | 3.569  | 0.00 | 0.00 | H |
| ATOM | 227 | HE1  | PHE | 14 | 11.058 | 5.244  | 2.289  | 0.00 | 0.00 | H |
| ATOM | 228 | HE2  | PHE | 14 | 6.862  | 4.312  | 1.992  | 0.00 | 0.00 | H |
| ATOM | 229 | HZ   | PHE | 14 | 9.233  | 4.009  | 1.223  | 0.00 | 0.00 | H |
| ATOM | 230 | N    | GLY | 15 | 6.413  | 10.180 | 2.595  | 0.00 | 0.00 | N |
| ATOM | 231 | CA   | GLY | 15 | 5.889  | 10.441 | 1.250  | 0.00 | 0.00 | C |
| ATOM | 232 | C    | GLY | 15 | 6.750  | 11.430 | 0.410  | 0.00 | 0.00 | C |
| ATOM | 233 | O    | GLY | 15 | 6.985  | 11.136 | -0.731 | 0.00 | 0.00 | O |
| ATOM | 234 | H    | GLY | 15 | 6.049  | 10.615 | 3.431  | 0.00 | 0.00 | H |
| ATOM | 235 | HA2  | GLY | 15 | 5.897  | 9.515  | 0.677  | 0.00 | 0.00 | H |
| ATOM | 236 | HA3  | GLY | 15 | 4.859  | 10.792 | 1.329  | 0.00 | 0.00 | H |
| ATOM | 237 | N    | ASP | 16 | 7.010  | 12.599 | 1.026  | 0.00 | 0.00 | N |
| ATOM | 238 | CA   | ASP | 16 | 7.826  | 13.649 | 0.337  | 0.00 | 0.00 | C |
| ATOM | 239 | C    | ASP | 16 | 9.114  | 13.198 | -0.290 | 0.00 | 0.00 | C |
| ATOM | 240 | O    | ASP | 16 | 9.468  | 13.633 | -1.356 | 0.00 | 0.00 | O |
| ATOM | 241 | CB   | ASP | 16 | 8.094  | 14.806 | 1.181  | 0.00 | 0.00 | C |
| ATOM | 242 | CG   | ASP | 16 | 6.833  | 15.508 | 1.636  | 0.00 | 0.00 | C |
| ATOM | 243 | OD1  | ASP | 16 | 6.807  | 15.928 | 2.807  | 0.00 | 0.00 | O |
| ATOM | 244 | OD2  | ASP | 16 | 5.785  | 15.564 | 0.963  | 0.00 | 0.00 | O |
| ATOM | 245 | H    | ASP | 16 | 6.749  | 12.744 | 1.991  | 0.00 | 0.00 | H |
| ATOM | 246 | HA   | ASP | 16 | 7.196  | 13.944 | -0.502 | 0.00 | 0.00 | H |
| ATOM | 247 | HB2  | ASP | 16 | 8.647  | 14.443 | 2.047  | 0.00 | 0.00 | H |
| ATOM | 248 | HB3  | ASP | 16 | 8.750  | 15.495 | 0.649  | 0.00 | 0.00 | H |
| ATOM | 249 | N    | LYS | 17 | 9.802  | 12.355 | 0.499  | 0.00 | 0.00 | N |
| ATOM | 250 | CA   | LYS | 17 | 10.973 | 11.503 | 0.103  | 0.00 | 0.00 | C |
| ATOM | 251 | C    | LYS | 17 | 10.681 | 10.637 | -1.104 | 0.00 | 0.00 | C |
| ATOM | 252 | O    | LYS | 17 | 11.400 | 10.700 | -2.091 | 0.00 | 0.00 | O |
| ATOM | 253 | CB   | LYS | 17 | 11.432 | 10.678 | 1.333  | 0.00 | 0.00 | C |
| ATOM | 254 | CG   | LYS | 17 | 12.641 | 11.279 | 2.112  | 0.00 | 0.00 | C |
| ATOM | 255 | CD   | LYS | 17 | 12.899 | 10.338 | 3.234  | 0.00 | 0.00 | C |
| ATOM | 256 | CE   | LYS | 17 | 14.110 | 10.804 | 4.021  | 0.00 | 0.00 | C |
| ATOM | 257 | NZ   | LYS | 17 | 13.803 | 12.078 | 4.771  | 0.00 | 0.00 | N |
| ATOM | 258 | H    | LYS | 17 | 9.463  | 12.376 | 1.450  | 0.00 | 0.00 | H |
| ATOM | 259 | HA   | LYS | 17 | 11.786 | 12.187 | -0.140 | 0.00 | 0.00 | H |
| ATOM | 260 | HB2  | LYS | 17 | 10.586 | 10.409 | 1.967  | 0.00 | 0.00 | H |
| ATOM | 261 | HB3  | LYS | 17 | 11.733 | 9.742  | 0.863  | 0.00 | 0.00 | H |
| ATOM | 262 | HG2  | LYS | 17 | 13.563 | 11.238 | 1.535  | 0.00 | 0.00 | H |
| ATOM | 263 | HG3  | LYS | 17 | 12.381 | 12.310 | 2.359  | 0.00 | 0.00 | H |
| ATOM | 264 | HD2  | LYS | 17 | 11.999 | 10.268 | 3.844  | 0.00 | 0.00 | H |
| ATOM | 265 | HD3  | LYS | 17 | 13.116 | 9.326  | 2.890  | 0.00 | 0.00 | H |
| ATOM | 266 | HE2  | LYS | 17 | 14.496 | 10.097 | 4.754  | 0.00 | 0.00 | H |
| ATOM | 267 | HE3  | LYS | 17 | 14.891 | 10.999 | 3.287  | 0.00 | 0.00 | H |
| ATOM | 268 | HZ1  | LYS | 17 | 13.596 | 12.892 | 4.210  | 0.00 | 0.00 | H |
| ATOM | 269 | HZ2  | LYS | 17 | 13.004 | 12.045 | 5.388  | 0.00 | 0.00 | H |
| ATOM | 270 | HZ3  | LYS | 17 | 14.661 | 12.222 | 5.285  | 0.00 | 0.00 | H |
| ATOM | 271 | N    | LEU | 18 | 9.601  | 9.900  | -1.069 | 0.00 | 0.00 | N |
| ATOM | 272 | CA   | LEU | 18 | 9.162  | 8.975  | -2.176 | 0.00 | 0.00 | C |
| ATOM | 273 | C    | LEU | 18 | 8.651  | 9.737  | -3.392 | 0.00 | 0.00 | C |
| ATOM | 274 | O    | LEU | 18 | 8.804  | 9.338  | -4.549 | 0.00 | 0.00 | O |
| ATOM | 275 | CB   | LEU | 18 | 8.285  | 7.922  | -1.548 | 0.00 | 0.00 | C |
| ATOM | 276 | CG   | LEU | 18 | 7.990  | 6.822  | -2.547 | 0.00 | 0.00 | C |
| ATOM | 277 | CD1  | LEU | 18 | 9.182  | 6.000  | -3.070 | 0.00 | 0.00 | C |
| ATOM | 278 | CD2  | LEU | 18 | 6.830  | 5.945  | -2.082 | 0.00 | 0.00 | C |
| ATOM | 279 | H    | LEU | 18 | 9.011  | 9.937  | -0.250 | 0.00 | 0.00 | H |
| ATOM | 280 | HA   | LEU | 18 | 10.053 | 8.449  | -2.517 | 0.00 | 0.00 | H |
| ATOM | 281 | HB2  | LEU | 18 | 8.888  | 7.567  | -0.711 | 0.00 | 0.00 | H |
| ATOM | 282 | HB3  | LEU | 18 | 7.369  | 8.374  | -1.165 | 0.00 | 0.00 | H |
| ATOM | 283 | HG   | LEU | 18 | 7.552  | 7.224  | -3.461 | 0.00 | 0.00 | H |
| ATOM | 284 | 1HD1 | LEU | 18 | 9.758  | 5.828  | -2.161 | 0.00 | 0.00 | H |
| ATOM | 285 | 2HD1 | LEU | 18 | 8.954  | 4.970  | -3.343 | 0.00 | 0.00 | H |
| ATOM | 286 | 3HD1 | LEU | 18 | 9.835  | 6.563  | -3.739 | 0.00 | 0.00 | H |
| ATOM | 287 | 1HD2 | LEU | 18 | 7.202  | 5.283  | -1.300 | 0.00 | 0.00 | H |
| ATOM | 288 | 2HD2 | LEU | 18 | 5.972  | 6.601  | -1.936 | 0.00 | 0.00 | H |
| ATOM | 289 | 3HD2 | LEU | 18 | 6.602  | 5.248  | -2.889 | 0.00 | 0.00 | H |
| ATOM | 290 | N    | ASN | 19 | 8.124  | 10.961 | -3.192 | 0.00 | 0.00 | N |

|      |     |      |     |    |        |        |         |      |      |   |
|------|-----|------|-----|----|--------|--------|---------|------|------|---|
| ATOM | 291 | CA   | ASN | 19 | 7.796  | 11.874 | -4.274  | 0.00 | 0.00 | C |
| ATOM | 292 | C    | ASN | 19 | 9.083  | 12.339 | -4.996  | 0.00 | 0.00 | C |
| ATOM | 293 | O    | ASN | 19 | 9.147  | 12.255 | -6.181  | 0.00 | 0.00 | O |
| ATOM | 294 | CB   | ASN | 19 | 6.965  | 13.067 | -3.760  | 0.00 | 0.00 | C |
| ATOM | 295 | CG   | ASN | 19 | 6.397  | 13.788 | -4.951  | 0.00 | 0.00 | C |
| ATOM | 296 | ND2  | ASN | 19 | 5.986  | 15.032 | -4.892  | 0.00 | 0.00 | N |
| ATOM | 297 | OD1  | ASN | 19 | 6.166  | 13.115 | -5.963  | 0.00 | 0.00 | O |
| ATOM | 298 | H    | ASN | 19 | 8.151  | 11.381 | -2.273  | 0.00 | 0.00 | H |
| ATOM | 299 | HA   | ASN | 19 | 7.246  | 11.298 | -5.018  | 0.00 | 0.00 | H |
| ATOM | 300 | HB2  | ASN | 19 | 6.088  | 12.645 | -3.268  | 0.00 | 0.00 | H |
| ATOM | 301 | HB3  | ASN | 19 | 7.418  | 13.670 | -2.973  | 0.00 | 0.00 | H |
| ATOM | 302 | 1HD2 | ASN | 19 | 5.700  | 15.446 | -5.769  | 0.00 | 0.00 | H |
| ATOM | 303 | 2HD2 | ASN | 19 | 6.354  | 15.594 | -4.139  | 0.00 | 0.00 | H |
| ATOM | 304 | N    | PHE | 20 | 10.119 | 12.742 | -4.200  | 0.00 | 0.00 | N |
| ATOM | 305 | CA   | PHE | 20 | 11.469 | 13.011 | -4.805  | 0.00 | 0.00 | C |
| ATOM | 306 | C    | PHE | 20 | 12.297 | 11.803 | -5.304  | 0.00 | 0.00 | C |
| ATOM | 307 | O    | PHE | 20 | 13.358 | 12.030 | -5.925  | 0.00 | 0.00 | O |
| ATOM | 308 | CB   | PHE | 20 | 12.227 | 13.828 | -3.682  | 0.00 | 0.00 | C |
| ATOM | 309 | CG   | PHE | 20 | 13.474 | 14.596 | -4.138  | 0.00 | 0.00 | C |
| ATOM | 310 | CD1  | PHE | 20 | 13.435 | 15.524 | -5.192  | 0.00 | 0.00 | C |
| ATOM | 311 | CD2  | PHE | 20 | 14.738 | 14.350 | -3.490  | 0.00 | 0.00 | C |
| ATOM | 312 | CE1  | PHE | 20 | 14.612 | 15.971 | -5.735  | 0.00 | 0.00 | C |
| ATOM | 313 | CE2  | PHE | 20 | 15.948 | 14.922 | -4.035  | 0.00 | 0.00 | C |
| ATOM | 314 | CZ   | PHE | 20 | 15.866 | 15.708 | -5.154  | 0.00 | 0.00 | C |
| ATOM | 315 | H    | PHE | 20 | 9.991  | 12.990 | -3.228  | 0.00 | 0.00 | H |
| ATOM | 316 | HA   | PHE | 20 | 11.451 | 13.757 | -5.600  | 0.00 | 0.00 | H |
| ATOM | 317 | HB2  | PHE | 20 | 11.521 | 14.586 | -3.339  | 0.00 | 0.00 | H |
| ATOM | 318 | HB3  | PHE | 20 | 12.438 | 13.079 | -2.919  | 0.00 | 0.00 | H |
| ATOM | 319 | HD1  | PHE | 20 | 12.494 | 15.591 | -5.718  | 0.00 | 0.00 | H |
| ATOM | 320 | HD2  | PHE | 20 | 14.787 | 13.526 | -2.794  | 0.00 | 0.00 | H |
| ATOM | 321 | HE1  | PHE | 20 | 14.452 | 16.644 | -6.564  | 0.00 | 0.00 | H |
| ATOM | 322 | HE2  | PHE | 20 | 16.895 | 14.614 | -3.620  | 0.00 | 0.00 | H |
| ATOM | 323 | HZ   | PHE | 20 | 16.718 | 16.025 | -5.737  | 0.00 | 0.00 | H |
| ATOM | 324 | N    | ARG | 21 | 11.809 | 10.579 | -5.106  | 0.00 | 0.00 | N |
| ATOM | 325 | CA   | ARG | 21 | 12.492 | 9.353  | -5.724  | 0.00 | 0.00 | C |
| ATOM | 326 | C    | ARG | 21 | 12.358 | 9.229  | -7.272  | 0.00 | 0.00 | C |
| ATOM | 327 | O    | ARG | 21 | 12.047 | 8.165  | -7.863  | 0.00 | 0.00 | O |
| ATOM | 328 | CB   | ARG | 21 | 12.061 | 8.104  | -4.947  | 0.00 | 0.00 | C |
| ATOM | 329 | CG   | ARG | 21 | 13.183 | 7.016  | -5.163  | 0.00 | 0.00 | C |
| ATOM | 330 | CD   | ARG | 21 | 14.270 | 7.234  | -4.090  | 0.00 | 0.00 | C |
| ATOM | 331 | NE   | ARG | 21 | 15.349 | 6.212  | -4.255  | 0.00 | 0.00 | N |
| ATOM | 332 | CZ   | ARG | 21 | 16.517 | 6.377  | -4.780  | 0.00 | 0.00 | C |
| ATOM | 333 | NH1  | ARG | 21 | 16.936 | 7.490  | -5.330  | 0.00 | 0.00 | N |
| ATOM | 334 | NH2  | ARG | 21 | 17.387 | 5.433  | -4.881  | 0.00 | 0.00 | N |
| ATOM | 335 | H    | ARG | 21 | 10.840 | 10.502 | -4.835  | 0.00 | 0.00 | H |
| ATOM | 336 | HA   | ARG | 21 | 13.547 | 9.605  | -5.619  | 0.00 | 0.00 | H |
| ATOM | 337 | HB2  | ARG | 21 | 11.809 | 8.292  | -3.904  | 0.00 | 0.00 | H |
| ATOM | 338 | HB3  | ARG | 21 | 11.127 | 7.769  | -5.399  | 0.00 | 0.00 | H |
| ATOM | 339 | HG2  | ARG | 21 | 12.818 | 6.013  | -4.947  | 0.00 | 0.00 | H |
| ATOM | 340 | HG3  | ARG | 21 | 13.653 | 7.095  | -6.144  | 0.00 | 0.00 | H |
| ATOM | 341 | HD2  | ARG | 21 | 14.730 | 8.216  | -4.186  | 0.00 | 0.00 | H |
| ATOM | 342 | HD3  | ARG | 21 | 13.784 | 7.024  | -3.138  | 0.00 | 0.00 | H |
| ATOM | 343 | HE   | ARG | 21 | 15.135 | 5.305  | -3.866  | 0.00 | 0.00 | H |
| ATOM | 344 | 1HH1 | ARG | 21 | 16.495 | 8.338  | -5.006  | 0.00 | 0.00 | H |
| ATOM | 345 | 2HH1 | ARG | 21 | 17.729 | 7.604  | -5.945  | 0.00 | 0.00 | H |
| ATOM | 346 | 1HH2 | ARG | 21 | 17.060 | 4.538  | -4.548  | 0.00 | 0.00 | H |
| ATOM | 347 | 2HH2 | ARG | 21 | 18.169 | 5.583  | -5.504  | 0.00 | 0.00 | H |
| ATOM | 348 | N    | GLN | 22 | 12.358 | 10.334 | -7.962  | 0.00 | 0.00 | N |
| ATOM | 349 | CA   | GLN | 22 | 11.897 | 10.621 | -9.323  | 0.00 | 0.00 | C |
| ATOM | 350 | C    | GLN | 22 | 12.579 | 9.785  | -10.421 | 0.00 | 0.00 | C |
| ATOM | 351 | O    | GLN | 22 | 11.918 | 9.477  | -11.384 | 0.00 | 0.00 | O |
| ATOM | 352 | CB   | GLN | 22 | 12.004 | 12.101 | -9.656  | 0.00 | 0.00 | C |
| ATOM | 353 | CG   | GLN | 22 | 10.987 | 12.933 | -8.845  | 0.00 | 0.00 | C |
| ATOM | 354 | CD   | GLN | 22 | 10.901 | 14.352 | -9.206  | 0.00 | 0.00 | C |
| ATOM | 355 | NE2  | GLN | 22 | 10.542 | 15.213 | -8.289  | 0.00 | 0.00 | N |
| ATOM | 356 | OE1  | GLN | 22 | 11.130 | 14.831 | -10.319 | 0.00 | 0.00 | O |
| ATOM | 357 | H    | GLN | 22 | 12.771 | 11.053 | -7.387  | 0.00 | 0.00 | H |
| ATOM | 358 | HA   | GLN | 22 | 10.826 | 10.436 | -9.398  | 0.00 | 0.00 | H |
| ATOM | 359 | HB2  | GLN | 22 | 13.004 | 12.504 | -9.495  | 0.00 | 0.00 | H |
| ATOM | 360 | HB3  | GLN | 22 | 11.745 | 12.202 | -10.710 | 0.00 | 0.00 | H |
| ATOM | 361 | HG2  | GLN | 22 | 10.028 | 12.416 | -8.858  | 0.00 | 0.00 | H |
| ATOM | 362 | HG3  | GLN | 22 | 11.225 | 12.889 | -7.783  | 0.00 | 0.00 | H |
| ATOM | 363 | 1HE2 | GLN | 22 | 10.531 | 16.200 | -8.502  | 0.00 | 0.00 | H |
| ATOM | 364 | 2HE2 | GLN | 22 | 10.424 | 14.875 | -7.345  | 0.00 | 0.00 | H |
| ATOM | 365 | N    | LYS | 23 | 13.786 | 9.298  | -10.213 | 0.00 | 0.00 | N |
| ATOM | 366 | CA   | LYS | 23 | 14.632 | 8.576  | -11.154 | 0.00 | 0.00 | C |
| ATOM | 367 | C    | LYS | 23 | 14.461 | 7.058  | -11.065 | 0.00 | 0.00 | C |
| ATOM | 368 | O    | LYS | 23 | 14.633 | 6.408  | -12.079 | 0.00 | 0.00 | O |
| ATOM | 369 | CB   | LYS | 23 | 16.207 | 8.847  | -10.970 | 0.00 | 0.00 | C |
| ATOM | 370 | CG   | LYS | 23 | 16.567 | 10.306 | -10.781 | 0.00 | 0.00 | C |
| ATOM | 371 | CD   | LYS | 23 | 18.069 | 10.675 | -10.733 | 0.00 | 0.00 | C |
| ATOM | 372 | CE   | LYS | 23 | 18.231 | 12.211 | -10.769 | 0.00 | 0.00 | C |
| ATOM | 373 | NZ   | LYS | 23 | 17.855 | 12.806 | -9.475  | 0.00 | 0.00 | N |
| ATOM | 374 | H    | LYS | 23 | 14.232 | 9.543  | -9.340  | 0.00 | 0.00 | H |
| ATOM | 375 | HA   | LYS | 23 | 14.309 | 8.963  | -12.121 | 0.00 | 0.00 | H |
| ATOM | 376 | HB2  | LYS | 23 | 16.616 | 8.333  | -10.098 | 0.00 | 0.00 | H |
| ATOM | 377 | HB3  | LYS | 23 | 16.699 | 8.412  | -11.840 | 0.00 | 0.00 | H |
| ATOM | 378 | HG2  | LYS | 23 | 16.043 | 10.953 | -11.484 | 0.00 | 0.00 | H |
| ATOM | 379 | HG3  | LYS | 23 | 16.153 | 10.655 | -9.836  | 0.00 | 0.00 | H |
| ATOM | 380 | HD2  | LYS | 23 | 18.489 | 10.208 | -9.842  | 0.00 | 0.00 | H |
| ATOM | 381 | HD3  | LYS | 23 | 18.525 | 10.272 | -11.637 | 0.00 | 0.00 | H |
| ATOM | 382 | HE2  | LYS | 23 | 19.243 | 12.474 | -11.077 | 0.00 | 0.00 | H |
| ATOM | 383 | HE3  | LYS | 23 | 17.575 | 12.664 | -11.511 | 0.00 | 0.00 | H |
| ATOM | 384 | HZ1  | LYS | 23 | 18.573 | 12.464 | -8.852  | 0.00 | 0.00 | H |
| ATOM | 385 | HZ2  | LYS | 23 | 17.902 | 13.808 | -9.599  | 0.00 | 0.00 | H |
| ATOM | 386 | HZ3  | LYS | 23 | 16.899 | 12.563 | -9.255  | 0.00 | 0.00 | H |
| ATOM | 387 | N    | LEU | 24 | 14.015 | 6.520  | -9.956  | 0.00 | 0.00 | N |
| ATOM | 388 | CA   | LEU | 24 | 13.713 | 5.124  | -9.758  | 0.00 | 0.00 | C |
| ATOM | 389 | C    | LEU | 24 | 12.223 | 4.857  | -9.752  | 0.00 | 0.00 | C |
| ATOM | 390 | O    | LEU | 24 | 11.747 | 3.847  | -10.299 | 0.00 | 0.00 | O |
| ATOM | 391 | CB   | LEU | 24 | 14.411 | 4.800  | -8.421  | 0.00 | 0.00 | C |
| ATOM | 392 | CG   | LEU | 24 | 14.186 | 3.339  | -7.943  | 0.00 | 0.00 | C |
| ATOM | 393 | CD1  | LEU | 24 | 14.951 | 2.369  | -8.861  | 0.00 | 0.00 | C |
| ATOM | 394 | CD2  | LEU | 24 | 14.893 | 3.252  | -6.615  | 0.00 | 0.00 | C |
| ATOM | 395 | H    | LEU | 24 | 13.925 | 7.184  | -9.200  | 0.00 | 0.00 | H |

|       |     |      |     |    |         |        |         |      |      |   |
|-------|-----|------|-----|----|---------|--------|---------|------|------|---|
| ATOM  | 396 | HA   | LEU | 24 | 14.104  | 4.419  | -10.493 | 0.00 | 0.00 | H |
| ATOM  | 397 | HB2  | LEU | 24 | 15.486  | 4.774  | -8.600  | 0.00 | 0.00 | H |
| ATOM  | 398 | HB3  | LEU | 24 | 14.195  | 5.541  | -7.652  | 0.00 | 0.00 | H |
| ATOM  | 399 | HG   | LEU | 24 | 13.129  | 3.095  | -7.833  | 0.00 | 0.00 | H |
| ATOM  | 400 | 1HD1 | LEU | 24 | 14.643  | 2.452  | -9.903  | 0.00 | 0.00 | H |
| ATOM  | 401 | 2HD1 | LEU | 24 | 16.030  | 2.523  | -8.852  | 0.00 | 0.00 | H |
| ATOM  | 402 | 3HD1 | LEU | 24 | 14.742  | 1.346  | -8.546  | 0.00 | 0.00 | H |
| ATOM  | 403 | 1HD2 | LEU | 24 | 14.863  | 2.264  | -6.153  | 0.00 | 0.00 | H |
| ATOM  | 404 | 2HD2 | LEU | 24 | 15.956  | 3.455  | -6.744  | 0.00 | 0.00 | H |
| ATOM  | 405 | 3HD2 | LEU | 24 | 14.468  | 4.015  | -5.963  | 0.00 | 0.00 | H |
| ATOM  | 406 | N    | LEU | 25 | 11.427  | 5.814  | -9.146  | 0.00 | 0.00 | N |
| ATOM  | 407 | CA   | LEU | 25 | 9.911   | 5.719  | -9.106  | 0.00 | 0.00 | C |
| ATOM  | 408 | C    | LEU | 25 | 9.248   | 6.039  | -10.474 | 0.00 | 0.00 | C |
| ATOM  | 409 | O    | LEU | 25 | 8.464   | 6.996  | -10.554 | 0.00 | 0.00 | O |
| ATOM  | 410 | CB   | LEU | 25 | 9.337   | 6.586  | -7.960  | 0.00 | 0.00 | C |
| ATOM  | 411 | CG   | LEU | 25 | 7.925   | 6.328  | -7.523  | 0.00 | 0.00 | C |
| ATOM  | 412 | CD1  | LEU | 25 | 7.760   | 4.894  | -6.945  | 0.00 | 0.00 | C |
| ATOM  | 413 | CD2  | LEU | 25 | 7.431   | 7.260  | -6.423  | 0.00 | 0.00 | C |
| ATOM  | 414 | H    | LEU | 25 | 11.794  | 6.731  | -8.932  | 0.00 | 0.00 | H |
| ATOM  | 415 | HA   | LEU | 25 | 9.640   | 4.664  | -9.081  | 0.00 | 0.00 | H |
| ATOM  | 416 | HB2  | LEU | 25 | 10.041  | 6.449  | -7.139  | 0.00 | 0.00 | H |
| ATOM  | 417 | HB3  | LEU | 25 | 9.363   | 7.614  | -8.323  | 0.00 | 0.00 | H |
| ATOM  | 418 | HG   | LEU | 25 | 7.301   | 6.528  | -8.394  | 0.00 | 0.00 | H |
| ATOM  | 419 | 1HD1 | LEU | 25 | 7.991   | 4.780  | -5.886  | 0.00 | 0.00 | H |
| ATOM  | 420 | 2HD1 | LEU | 25 | 6.677   | 4.854  | -7.064  | 0.00 | 0.00 | H |
| ATOM  | 421 | 3HD1 | LEU | 25 | 8.332   | 4.232  | -7.594  | 0.00 | 0.00 | H |
| ATOM  | 422 | 1HD2 | LEU | 25 | 7.991   | 7.038  | -5.515  | 0.00 | 0.00 | H |
| ATOM  | 423 | 2HD2 | LEU | 25 | 6.403   | 6.973  | -6.210  | 0.00 | 0.00 | H |
| ATOM  | 424 | 3HD2 | LEU | 25 | 7.622   | 8.305  | -6.672  | 0.00 | 0.00 | H |
| ATOM  | 425 | N    | ASN | 26 | 9.587   | 5.358  | -11.535 | 0.00 | 0.00 | N |
| ATOM  | 426 | CA   | ASN | 26 | 9.180   | 5.633  | -12.889 | 0.00 | 0.00 | C |
| ATOM  | 427 | C    | ASN | 26 | 8.544   | 4.440  | -13.509 | 0.00 | 0.00 | C |
| ATOM  | 428 | O    | ASN | 26 | 8.698   | 3.309  | -13.065 | 0.00 | 0.00 | O |
| ATOM  | 429 | CB   | ASN | 26 | 10.545  | 6.063  | -13.544 | 0.00 | 0.00 | C |
| ATOM  | 430 | CG   | ASN | 26 | 10.381  | 6.710  | -14.858 | 0.00 | 0.00 | C |
| ATOM  | 431 | ND2  | ASN | 26 | 11.420  | 6.672  | -15.614 | 0.00 | 0.00 | N |
| ATOM  | 432 | OD1  | ASN | 26 | 9.300   | 7.138  | -15.245 | 0.00 | 0.00 | O |
| ATOM  | 433 | H    | ASN | 26 | 10.259  | 4.612  | -11.436 | 0.00 | 0.00 | H |
| ATOM  | 434 | HA   | ASN | 26 | 8.521   | 6.499  | -12.847 | 0.00 | 0.00 | H |
| ATOM  | 435 | HB2  | ASN | 26 | 10.951  | 6.835  | -12.889 | 0.00 | 0.00 | H |
| ATOM  | 436 | HB3  | ASN | 26 | 11.204  | 5.196  | -13.585 | 0.00 | 0.00 | H |
| ATOM  | 437 | 1HD2 | ASN | 26 | 11.455  | 7.181  | -16.486 | 0.00 | 0.00 | H |
| ATOM  | 438 | 2HD2 | ASN | 26 | 12.207  | 6.184  | -15.213 | 0.00 | 0.00 | H |
| ATOM  | 439 | N    | LEU | 27 | 7.788   | 4.730  | -14.574 | 0.00 | 0.00 | N |
| ATOM  | 440 | CA   | LEU | 27 | 7.379   | 3.753  | -15.577 | 0.00 | 0.00 | C |
| ATOM  | 441 | C    | LEU | 27 | 7.717   | 4.303  | -17.035 | 0.00 | 0.00 | C |
| ATOM  | 442 | O    | LEU | 27 | 7.084   | 5.209  | -17.660 | 0.00 | 0.00 | O |
| ATOM  | 443 | CB   | LEU | 27 | 5.864   | 3.358  | -15.474 | 0.00 | 0.00 | C |
| ATOM  | 444 | CG   | LEU | 27 | 5.372   | 2.320  | -16.574 | 0.00 | 0.00 | C |
| ATOM  | 445 | CD1  | LEU | 27 | 6.172   | 1.035  | -16.763 | 0.00 | 0.00 | C |
| ATOM  | 446 | CD2  | LEU | 27 | 3.982   | 1.805  | -16.205 | 0.00 | 0.00 | C |
| ATOM  | 447 | H    | LEU | 27 | 7.615   | 5.714  | -14.729 | 0.00 | 0.00 | H |
| ATOM  | 448 | HA   | LEU | 27 | 8.041   | 2.895  | -15.449 | 0.00 | 0.00 | H |
| ATOM  | 449 | HB2  | LEU | 27 | 5.791   | 2.861  | -14.506 | 0.00 | 0.00 | H |
| ATOM  | 450 | HB3  | LEU | 27 | 5.344   | 4.312  | -15.393 | 0.00 | 0.00 | H |
| ATOM  | 451 | HG   | LEU | 27 | 5.216   | 2.868  | -17.503 | 0.00 | 0.00 | H |
| ATOM  | 452 | 1HD1 | LEU | 27 | 6.338   | 0.576  | -15.788 | 0.00 | 0.00 | H |
| ATOM  | 453 | 2HD1 | LEU | 27 | 5.782   | 0.280  | -17.447 | 0.00 | 0.00 | H |
| ATOM  | 454 | 3HD1 | LEU | 27 | 7.114   | 1.379  | -17.192 | 0.00 | 0.00 | H |
| ATOM  | 455 | 1HD2 | LEU | 27 | 3.977   | 1.371  | -15.204 | 0.00 | 0.00 | H |
| ATOM  | 456 | 2HD2 | LEU | 27 | 3.233   | 2.595  | -16.188 | 0.00 | 0.00 | H |
| ATOM  | 457 | 3HD2 | LEU | 27 | 3.584   | 1.123  | -16.956 | 0.00 | 0.00 | H |
| TER   |     |      |     |    |         |        |         |      |      |   |
| MOL 2 |     |      |     |    |         |        |         |      |      |   |
| ATOM  | 458 | N    | SER | 28 | -12.910 | 3.860  | -17.466 | 0.00 | 0.00 | N |
| ATOM  | 459 | CA   | SER | 28 | -12.549 | 4.331  | -16.152 | 0.00 | 0.00 | C |
| ATOM  | 460 | C    | SER | 28 | -12.680 | 5.831  | -15.923 | 0.00 | 0.00 | C |
| ATOM  | 461 | O    | SER | 28 | -11.864 | 6.413  | -15.209 | 0.00 | 0.00 | O |
| ATOM  | 462 | CB   | SER | 28 | -11.350 | 3.690  | -15.484 | 0.00 | 0.00 | C |
| ATOM  | 463 | OG   | SER | 28 | -11.567 | 2.296  | -15.580 | 0.00 | 0.00 | O |
| ATOM  | 464 | H    | SER | 28 | -12.574 | 2.968  | -17.797 | 0.00 | 0.00 | H |
| ATOM  | 465 | HA   | SER | 28 | -13.375 | 3.997  | -15.521 | 0.00 | 0.00 | H |
| ATOM  | 466 | HB2  | SER | 28 | -10.378 | 3.949  | -15.904 | 0.00 | 0.00 | H |
| ATOM  | 467 | HB3  | SER | 28 | -11.268 | 3.888  | -14.415 | 0.00 | 0.00 | H |
| ATOM  | 468 | HG   | SER | 28 | -10.882 | 1.903  | -15.035 | 0.00 | 0.00 | H |
| ATOM  | 469 | N    | ALA | 29 | -13.680 | 6.491  | -16.494 | 0.00 | 0.00 | N |
| ATOM  | 470 | CA   | ALA | 29 | -13.930 | 7.852  | -16.216 | 0.00 | 0.00 | C |
| ATOM  | 471 | C    | ALA | 29 | -14.358 | 8.096  | -14.798 | 0.00 | 0.00 | C |
| ATOM  | 472 | O    | ALA | 29 | -14.146 | 9.144  | -14.235 | 0.00 | 0.00 | O |
| ATOM  | 473 | CB   | ALA | 29 | -14.878 | 8.430  | -17.219 | 0.00 | 0.00 | C |
| ATOM  | 474 | H    | ALA | 29 | -14.328 | 5.963  | -17.062 | 0.00 | 0.00 | H |
| ATOM  | 475 | HA   | ALA | 29 | -13.041 | 8.485  | -16.238 | 0.00 | 0.00 | H |
| ATOM  | 476 | HB1  | ALA | 29 | -15.797 | 7.841  | -17.220 | 0.00 | 0.00 | H |
| ATOM  | 477 | HB2  | ALA | 29 | -15.208 | 9.431  | -16.941 | 0.00 | 0.00 | H |
| ATOM  | 478 | HB3  | ALA | 29 | -14.276 | 8.536  | -18.120 | 0.00 | 0.00 | H |
| ATOM  | 479 | N    | SER | 30 | -15.250 | 7.239  | -14.258 | 0.00 | 0.00 | N |
| ATOM  | 480 | CA   | SER | 30 | -15.895 | 7.543  | -12.941 | 0.00 | 0.00 | C |
| ATOM  | 481 | C    | SER | 30 | -14.972 | 7.007  | -11.909 | 0.00 | 0.00 | C |
| ATOM  | 482 | O    | SER | 30 | -14.345 | 5.920  | -12.070 | 0.00 | 0.00 | O |
| ATOM  | 483 | CB   | SER | 30 | -17.235 | 6.794  | -12.898 | 0.00 | 0.00 | C |
| ATOM  | 484 | OG   | SER | 30 | -18.065 | 7.200  | -13.924 | 0.00 | 0.00 | O |
| ATOM  | 485 | H    | SER | 30 | -15.456 | 6.418  | -14.809 | 0.00 | 0.00 | H |
| ATOM  | 486 | HA   | SER | 30 | -16.169 | 8.579  | -12.748 | 0.00 | 0.00 | H |
| ATOM  | 487 | HB2  | SER | 30 | -17.059 | 5.719  | -12.911 | 0.00 | 0.00 | H |
| ATOM  | 488 | HB3  | SER | 30 | -17.668 | 6.989  | -11.917 | 0.00 | 0.00 | H |
| ATOM  | 489 | HG   | SER | 30 | -18.656 | 6.445  | -13.944 | 0.00 | 0.00 | H |
| ATOM  | 490 | N    | GLU | 31 | -14.867 | 7.718  | -10.785 | 0.00 | 0.00 | N |
| ATOM  | 491 | CA   | GLU | 31 | -13.741 | 7.468  | -9.839  | 0.00 | 0.00 | C |
| ATOM  | 492 | C    | GLU | 31 | -13.810 | 6.107  | -9.071  | 0.00 | 0.00 | C |
| ATOM  | 493 | O    | GLU | 31 | -12.790 | 5.519  | -8.632  | 0.00 | 0.00 | O |
| ATOM  | 494 | CB   | GLU | 31 | -13.568 | 8.653  | -8.887  | 0.00 | 0.00 | C |
| ATOM  | 495 | CG   | GLU | 31 | -14.840 | 8.765  | -8.001  | 0.00 | 0.00 | C |
| ATOM  | 496 | CD   | GLU | 31 | -15.028 | 10.110 | -7.334  | 0.00 | 0.00 | C |
| ATOM  | 497 | OE1  | GLU | 31 | -14.981 | 10.234 | -6.098  | 0.00 | 0.00 | O |
| ATOM  | 498 | OE2  | GLU | 31 | -15.308 | 11.109 | -8.029  | 0.00 | 0.00 | O |

|      |     |      |     |    |         |        |         |      |      |   |
|------|-----|------|-----|----|---------|--------|---------|------|------|---|
| ATOM | 499 | H    | GLU | 31 | -15.408 | 8.567  | -10.709 | 0.00 | 0.00 | H |
| ATOM | 500 | HA   | GLU | 31 | -12.890 | 7.320  | -10.506 | 0.00 | 0.00 | H |
| ATOM | 501 | HB2  | GLU | 31 | -12.663 | 8.600  | -8.281  | 0.00 | 0.00 | H |
| ATOM | 502 | HB3  | GLU | 31 | -13.550 | 9.569  | -9.477  | 0.00 | 0.00 | H |
| ATOM | 503 | HG2  | GLU | 31 | -15.737 | 8.522  | -8.572  | 0.00 | 0.00 | H |
| ATOM | 504 | HG3  | GLU | 31 | -14.782 | 7.950  | -7.279  | 0.00 | 0.00 | H |
| ATOM | 505 | N    | GLU | 32 | -15.014 | 5.574  | -8.971  | 0.00 | 0.00 | N |
| ATOM | 506 | CA   | GLU | 32 | -15.197 | 4.167  | -8.570  | 0.00 | 0.00 | C |
| ATOM | 507 | C    | GLU | 32 | -14.581 | 3.061  | -9.511  | 0.00 | 0.00 | C |
| ATOM | 508 | O    | GLU | 32 | -13.966 | 2.092  | -8.978  | 0.00 | 0.00 | O |
| ATOM | 509 | CB   | GLU | 32 | -16.707 | 3.886  | -8.312  | 0.00 | 0.00 | C |
| ATOM | 510 | CG   | GLU | 32 | -16.823 | 2.572  | -7.592  | 0.00 | 0.00 | C |
| ATOM | 511 | CD   | GLU | 32 | -18.189 | 2.398  | -6.954  | 0.00 | 0.00 | C |
| ATOM | 512 | OE1  | GLU | 32 | -18.213 | 2.151  | -5.719  | 0.00 | 0.00 | O |
| ATOM | 513 | OE2  | GLU | 32 | -19.178 | 2.473  | -7.728  | 0.00 | 0.00 | O |
| ATOM | 514 | H    | GLU | 32 | -15.811 | 6.121  | -9.262  | 0.00 | 0.00 | H |
| ATOM | 515 | HA   | GLU | 32 | -14.608 | 4.016  | -7.666  | 0.00 | 0.00 | H |
| ATOM | 516 | HB2  | GLU | 32 | -17.127 | 4.700  | -7.722  | 0.00 | 0.00 | H |
| ATOM | 517 | HB3  | GLU | 32 | -17.260 | 3.885  | -9.252  | 0.00 | 0.00 | H |
| ATOM | 518 | HG2  | GLU | 32 | -16.549 | 1.741  | -8.241  | 0.00 | 0.00 | H |
| ATOM | 519 | HG3  | GLU | 32 | -16.115 | 2.471  | -6.768  | 0.00 | 0.00 | H |
| ATOM | 520 | N    | GLN | 33 | -14.596 | 3.308  | -10.796 | 0.00 | 0.00 | N |
| ATOM | 521 | CA   | GLN | 33 | -13.917 | 2.399  | -11.713 | 0.00 | 0.00 | C |
| ATOM | 522 | C    | GLN | 33 | -12.411 | 2.456  | -11.570 | 0.00 | 0.00 | C |
| ATOM | 523 | O    | GLN | 33 | -11.735 | 1.504  | -11.808 | 0.00 | 0.00 | O |
| ATOM | 524 | CB   | GLN | 33 | -14.285 | 2.767  | -13.166 | 0.00 | 0.00 | C |
| ATOM | 525 | CG   | GLN | 33 | -15.742 | 3.014  | -13.498 | 0.00 | 0.00 | C |
| ATOM | 526 | CD   | GLN | 33 | -15.900 | 3.530  | -14.896 | 0.00 | 0.00 | C |
| ATOM | 527 | NE2  | GLN | 33 | -15.856 | 2.593  | -15.886 | 0.00 | 0.00 | N |
| ATOM | 528 | OE1  | GLN | 33 | -15.946 | 4.690  | -15.180 | 0.00 | 0.00 | O |
| ATOM | 529 | H    | GLN | 33 | -15.029 | 4.129  | -11.194 | 0.00 | 0.00 | H |
| ATOM | 530 | HA   | GLN | 33 | -14.288 | 1.383  | -11.562 | 0.00 | 0.00 | H |
| ATOM | 531 | HB2  | GLN | 33 | -13.647 | 3.608  | -13.439 | 0.00 | 0.00 | H |
| ATOM | 532 | HB3  | GLN | 33 | -13.959 | 2.047  | -13.917 | 0.00 | 0.00 | H |
| ATOM | 533 | HG2  | GLN | 33 | -16.196 | 2.030  | -13.376 | 0.00 | 0.00 | H |
| ATOM | 534 | HG3  | GLN | 33 | -16.258 | 3.696  | -12.821 | 0.00 | 0.00 | H |
| ATOM | 535 | 1HE2 | GLN | 33 | -15.950 | 2.861  | -16.855 | 0.00 | 0.00 | H |
| ATOM | 536 | 2HE2 | GLN | 33 | -15.714 | 1.606  | -15.723 | 0.00 | 0.00 | H |
| ATOM | 537 | N    | VAL | 34 | -11.840 | 3.554  | -11.151 | 0.00 | 0.00 | N |
| ATOM | 538 | CA   | VAL | 34 | -10.382 | 3.753  | -10.717 | 0.00 | 0.00 | C |
| ATOM | 539 | C    | VAL | 34 | -10.129 | 3.153  | -9.353  | 0.00 | 0.00 | C |
| ATOM | 540 | O    | VAL | 34 | -9.023  | 2.701  | -9.102  | 0.00 | 0.00 | O |
| ATOM | 541 | CB   | VAL | 34 | -10.179 | 5.270  | -10.810 | 0.00 | 0.00 | C |
| ATOM | 542 | CG1  | VAL | 34 | -8.799  | 5.668  | -10.227 | 0.00 | 0.00 | C |
| ATOM | 543 | CG2  | VAL | 34 | -10.275 | 5.774  | -12.256 | 0.00 | 0.00 | C |
| ATOM | 544 | H    | VAL | 34 | -12.494 | 4.299  | -10.954 | 0.00 | 0.00 | H |
| ATOM | 545 | HA   | VAL | 34 | -9.742  | 3.274  | -11.458 | 0.00 | 0.00 | H |
| ATOM | 546 | HB   | VAL | 34 | -10.979 | 5.808  | -10.303 | 0.00 | 0.00 | H |
| ATOM | 547 | 1HG1 | VAL | 34 | -8.931  | 5.515  | -9.156  | 0.00 | 0.00 | H |
| ATOM | 548 | 2HG1 | VAL | 34 | -7.968  | 5.074  | -10.606 | 0.00 | 0.00 | H |
| ATOM | 549 | 3HG1 | VAL | 34 | -8.605  | 6.736  | -10.133 | 0.00 | 0.00 | H |
| ATOM | 550 | 1HG2 | VAL | 34 | -11.305 | 5.728  | -12.608 | 0.00 | 0.00 | H |
| ATOM | 551 | 2HG2 | VAL | 34 | -9.895  | 6.795  | -12.321 | 0.00 | 0.00 | H |
| ATOM | 552 | 3HG2 | VAL | 34 | -9.668  | 5.065  | -12.820 | 0.00 | 0.00 | H |
| ATOM | 553 | N    | ALA | 35 | -11.023 | 3.228  | -8.403  | 0.00 | 0.00 | N |
| ATOM | 554 | CA   | ALA | 35 | -10.947 | 2.407  | -7.154  | 0.00 | 0.00 | C |
| ATOM | 555 | C    | ALA | 35 | -10.975 | 0.835  | -7.412  | 0.00 | 0.00 | C |
| ATOM | 556 | O    | ALA | 35 | -10.267 | 0.171  | -6.668  | 0.00 | 0.00 | O |
| ATOM | 557 | CB   | ALA | 35 | -12.108 | 2.919  | -6.254  | 0.00 | 0.00 | C |
| ATOM | 558 | H    | ALA | 35 | -11.899 | 3.661  | -8.656  | 0.00 | 0.00 | H |
| ATOM | 559 | HA   | ALA | 35 | -10.026 | 2.687  | -6.641  | 0.00 | 0.00 | H |
| ATOM | 560 | HB1  | ALA | 35 | -11.837 | 3.929  | -5.947  | 0.00 | 0.00 | H |
| ATOM | 561 | HB2  | ALA | 35 | -13.091 | 2.801  | -6.708  | 0.00 | 0.00 | H |
| ATOM | 562 | HB3  | ALA | 35 | -12.033 | 2.281  | -5.374  | 0.00 | 0.00 | H |
| ATOM | 563 | N    | GLN | 36 | -11.644 | 0.419  | -8.497  | 0.00 | 0.00 | N |
| ATOM | 564 | CA   | GLN | 36 | -11.656 | -0.917 | -9.088  | 0.00 | 0.00 | C |
| ATOM | 565 | C    | GLN | 36 | -10.290 | -1.348 | -9.659  | 0.00 | 0.00 | C |
| ATOM | 566 | O    | GLN | 36 | -9.760  | -2.327 | -9.221  | 0.00 | 0.00 | O |
| ATOM | 567 | CB   | GLN | 36 | -12.889 | -1.174 | -10.055 | 0.00 | 0.00 | C |
| ATOM | 568 | CG   | GLN | 36 | -13.239 | -2.565 | -10.428 | 0.00 | 0.00 | C |
| ATOM | 569 | CD   | GLN | 36 | -14.362 | -2.709 | -11.449 | 0.00 | 0.00 | C |
| ATOM | 570 | NE2  | GLN | 36 | -14.152 | -2.433 | -12.712 | 0.00 | 0.00 | N |
| ATOM | 571 | OE1  | GLN | 36 | -15.532 | -2.911 | -11.120 | 0.00 | 0.00 | O |
| ATOM | 572 | H    | GLN | 36 | -12.078 | 1.138  | -9.057  | 0.00 | 0.00 | H |
| ATOM | 573 | HA   | GLN | 36 | -11.854 | -1.573 | -8.240  | 0.00 | 0.00 | H |
| ATOM | 574 | HB2  | GLN | 36 | -13.846 | -0.856 | -9.644  | 0.00 | 0.00 | H |
| ATOM | 575 | HB3  | GLN | 36 | -12.711 | -0.658 | -10.999 | 0.00 | 0.00 | H |
| ATOM | 576 | HG2  | GLN | 36 | -12.355 | -3.028 | -10.866 | 0.00 | 0.00 | H |
| ATOM | 577 | HG3  | GLN | 36 | -13.513 | -3.175 | -9.567  | 0.00 | 0.00 | H |
| ATOM | 578 | 1HE2 | GLN | 36 | -13.242 | -2.139 | -13.037 | 0.00 | 0.00 | H |
| ATOM | 579 | 2HE2 | GLN | 36 | -14.844 | -2.548 | -13.438 | 0.00 | 0.00 | H |
| ATOM | 580 | N    | ASP | 37 | -9.720  | -0.457 | -10.536 | 0.00 | 0.00 | N |
| ATOM | 581 | CA   | ASP | 37 | -8.384  | -0.670 | -11.079 | 0.00 | 0.00 | C |
| ATOM | 582 | C    | ASP | 37 | -7.279  | -0.450 | -10.034 | 0.00 | 0.00 | C |
| ATOM | 583 | O    | ASP | 37 | -6.239  | -1.101 | -10.030 | 0.00 | 0.00 | O |
| ATOM | 584 | CB   | ASP | 37 | -8.252  | 0.382  | -12.230 | 0.00 | 0.00 | C |
| ATOM | 585 | CG   | ASP | 37 | -9.006  | 0.041  | -13.509 | 0.00 | 0.00 | C |
| ATOM | 586 | OD1  | ASP | 37 | -9.721  | 0.950  | -14.063 | 0.00 | 0.00 | O |
| ATOM | 587 | OD2  | ASP | 37 | -8.855  | -1.095 | -14.044 | 0.00 | 0.00 | O |
| ATOM | 588 | H    | ASP | 37 | -10.308 | 0.250  | -10.955 | 0.00 | 0.00 | H |
| ATOM | 589 | HA   | ASP | 37 | -8.238  | -1.635 | -11.564 | 0.00 | 0.00 | H |
| ATOM | 590 | HB2  | ASP | 37 | -8.419  | 1.400  | -11.877 | 0.00 | 0.00 | H |
| ATOM | 591 | HB3  | ASP | 37 | -7.215  | 0.368  | -12.563 | 0.00 | 0.00 | H |
| ATOM | 592 | N    | THR | 38 | -7.586  | 0.397  | -9.102  | 0.00 | 0.00 | N |
| ATOM | 593 | CA   | THR | 38 | -6.569  | 0.475  | -7.916  | 0.00 | 0.00 | C |
| ATOM | 594 | C    | THR | 38 | -6.456  | -0.763 | -6.950  | 0.00 | 0.00 | C |
| ATOM | 595 | O    | THR | 38 | -5.380  | -1.041 | -6.395  | 0.00 | 0.00 | O |
| ATOM | 596 | CB   | THR | 38 | -6.869  | 1.655  | -6.943  | 0.00 | 0.00 | C |
| ATOM | 597 | CG2  | THR | 38 | -5.849  | 1.899  | -5.810  | 0.00 | 0.00 | C |
| ATOM | 598 | OG1  | THR | 38 | -6.768  | 2.835  | -7.772  | 0.00 | 0.00 | O |
| ATOM | 599 | H    | THR | 38 | -8.438  | 0.940  | -9.077  | 0.00 | 0.00 | H |
| ATOM | 600 | HA   | THR | 38 | -5.578  | 0.541  | -8.366  | 0.00 | 0.00 | H |
| ATOM | 601 | HB   | THR | 38 | -7.908  | 1.706  | -6.620  | 0.00 | 0.00 | H |
| ATOM | 602 | HG1  | THR | 38 | -7.539  | 2.819  | -8.346  | 0.00 | 0.00 | H |
| ATOM | 603 | 1HG2 | THR | 38 | -6.047  | 1.257  | -4.953  | 0.00 | 0.00 | H |



|      |     |      |     |    |         |        |         |      |      |   |
|------|-----|------|-----|----|---------|--------|---------|------|------|---|
| ATOM | 604 | ZHG2 | THR | 38 | -4.886  | 1.568  | -6.196  | 0.00 | 0.00 | H |
| ATOM | 605 | 3HG2 | THR | 38 | -5.870  | 2.967  | -5.593  | 0.00 | 0.00 | H |
| ATOM | 606 | N    | GLU | 39 | -7.548  | -1.436 | -6.634  | 0.00 | 0.00 | N |
| ATOM | 607 | CA   | GLU | 39 | -7.511  | -2.788 | -6.012  | 0.00 | 0.00 | C |
| ATOM | 608 | C    | GLU | 39 | -6.567  | -3.774 | -6.740  | 0.00 | 0.00 | C |
| ATOM | 609 | O    | GLU | 39 | -5.805  | -4.558 | -6.142  | 0.00 | 0.00 | O |
| ATOM | 610 | CB   | GLU | 39 | -8.936  | -3.428 | -5.864  | 0.00 | 0.00 | C |
| ATOM | 611 | CG   | GLU | 39 | -8.971  | -4.140 | -4.491  | 0.00 | 0.00 | C |
| ATOM | 612 | CD   | GLU | 39 | -10.273 | -4.880 | -4.287  | 0.00 | 0.00 | C |
| ATOM | 613 | OE1  | GLU | 39 | -10.382 | -6.082 | -4.587  | 0.00 | 0.00 | O |
| ATOM | 614 | OE2  | GLU | 39 | -11.301 | -4.195 | -4.116  | 0.00 | 0.00 | O |
| ATOM | 615 | H    | GLU | 39 | -8.480  | -1.112 | -6.850  | 0.00 | 0.00 | H |
| ATOM | 616 | HA   | GLU | 39 | -7.170  | -2.626 | -4.989  | 0.00 | 0.00 | H |
| ATOM | 617 | HB2  | GLU | 39 | -9.634  | -2.592 | -5.934  | 0.00 | 0.00 | H |
| ATOM | 618 | HB3  | GLU | 39 | -9.157  | -4.143 | -6.656  | 0.00 | 0.00 | H |
| ATOM | 619 | HG2  | GLU | 39 | -8.175  | -4.882 | -4.418  | 0.00 | 0.00 | H |
| ATOM | 620 | HG3  | GLU | 39 | -8.902  | -3.397 | -3.695  | 0.00 | 0.00 | H |
| ATOM | 621 | N    | GLU | 40 | -6.649  | -3.834 | -8.066  | 0.00 | 0.00 | N |
| ATOM | 622 | CA   | GLU | 40 | -5.842  | -4.769 | -8.839  | 0.00 | 0.00 | C |
| ATOM | 623 | C    | GLU | 40 | -4.318  | -4.327 | -8.772  | 0.00 | 0.00 | C |
| ATOM | 624 | O    | GLU | 40 | -3.485  | -5.182 | -8.547  | 0.00 | 0.00 | O |
| ATOM | 625 | CB   | GLU | 40 | -6.208  | -4.721 | -10.330 | 0.00 | 0.00 | C |
| ATOM | 626 | CG   | GLU | 40 | -7.621  | -5.114 | -10.602 | 0.00 | 0.00 | C |
| ATOM | 627 | CD   | GLU | 40 | -8.084  | -6.471 | -9.939  | 0.00 | 0.00 | C |
| ATOM | 628 | OE1  | GLU | 40 | -7.382  | -7.501 | -9.789  | 0.00 | 0.00 | O |
| ATOM | 629 | OE2  | GLU | 40 | -9.222  | -6.500 | -9.508  | 0.00 | 0.00 | O |
| ATOM | 630 | H    | GLU | 40 | -7.205  | -3.097 | -8.476  | 0.00 | 0.00 | H |
| ATOM | 631 | HA   | GLU | 40 | -6.017  | -5.748 | -8.394  | 0.00 | 0.00 | H |
| ATOM | 632 | HB2  | GLU | 40 | -6.115  | -3.663 | -10.580 | 0.00 | 0.00 | H |
| ATOM | 633 | HB3  | GLU | 40 | -5.469  | -5.259 | -10.924 | 0.00 | 0.00 | H |
| ATOM | 634 | HG2  | GLU | 40 | -8.304  | -4.333 | -10.270 | 0.00 | 0.00 | H |
| ATOM | 635 | HG3  | GLU | 40 | -7.855  | -5.178 | -11.664 | 0.00 | 0.00 | H |
| ATOM | 636 | N    | VAL | 41 | -3.990  | -3.031 | -8.836  | 0.00 | 0.00 | N |
| ATOM | 637 | CA   | VAL | 41 | -2.596  | -2.593 | -8.630  | 0.00 | 0.00 | C |
| ATOM | 638 | C    | VAL | 41 | -2.040  | -2.956 | -7.240  | 0.00 | 0.00 | C |
| ATOM | 639 | O    | VAL | 41 | -0.914  | -3.425 | -7.105  | 0.00 | 0.00 | O |
| ATOM | 640 | CB   | VAL | 41 | -2.389  | -1.102 | -8.898  | 0.00 | 0.00 | C |
| ATOM | 641 | CG1  | VAL | 41 | -1.006  | -0.533 | -8.507  | 0.00 | 0.00 | C |
| ATOM | 642 | CG2  | VAL | 41 | -2.593  | -0.786 | -10.363 | 0.00 | 0.00 | C |
| ATOM | 643 | H    | VAL | 41 | -4.744  | -2.392 | -9.043  | 0.00 | 0.00 | H |
| ATOM | 644 | HA   | VAL | 41 | -2.039  | -3.155 | -9.381  | 0.00 | 0.00 | H |
| ATOM | 645 | HB   | VAL | 41 | -3.103  | -0.482 | -8.357  | 0.00 | 0.00 | H |
| ATOM | 646 | 1HG1 | VAL | 41 | -0.272  | -1.286 | -8.794  | 0.00 | 0.00 | H |
| ATOM | 647 | 2HG1 | VAL | 41 | -0.921  | 0.489  | -8.875  | 0.00 | 0.00 | H |
| ATOM | 648 | 3HG1 | VAL | 41 | -0.904  | -0.408 | -7.429  | 0.00 | 0.00 | H |
| ATOM | 649 | 1HG2 | VAL | 41 | -1.817  | -1.099 | -11.062 | 0.00 | 0.00 | H |
| ATOM | 650 | 2HG2 | VAL | 41 | -3.584  | -1.152 | -10.635 | 0.00 | 0.00 | H |
| ATOM | 651 | 3HG2 | VAL | 41 | -2.634  | 0.297  | -10.464 | 0.00 | 0.00 | H |
| ATOM | 652 | N    | PHE | 42 | -2.799  | -2.703 | -6.200  | 0.00 | 0.00 | N |
| ATOM | 653 | CA   | PHE | 42 | -2.463  | -2.951 | -4.825  | 0.00 | 0.00 | C |
| ATOM | 654 | C    | PHE | 42 | -2.203  | -4.452 | -4.594  | 0.00 | 0.00 | C |
| ATOM | 655 | O    | PHE | 42 | -1.113  | -4.899 | -4.261  | 0.00 | 0.00 | O |
| ATOM | 656 | CB   | PHE | 42 | -3.538  | -2.362 | -3.915  | 0.00 | 0.00 | C |
| ATOM | 657 | CG   | PHE | 42 | -3.202  | -2.383 | -2.425  | 0.00 | 0.00 | C |
| ATOM | 658 | CD1  | PHE | 42 | -4.290  | -2.580 | -1.508  | 0.00 | 0.00 | C |
| ATOM | 659 | CD2  | PHE | 42 | -1.893  | -2.307 | -1.927  | 0.00 | 0.00 | C |
| ATOM | 660 | CE1  | PHE | 42 | -4.101  | -2.622 | -0.098  | 0.00 | 0.00 | C |
| ATOM | 661 | CE2  | PHE | 42 | -1.615  | -2.353 | -0.556  | 0.00 | 0.00 | C |
| ATOM | 662 | CZ   | PHE | 42 | -2.766  | -2.455 | 0.319   | 0.00 | 0.00 | C |
| ATOM | 663 | H    | PHE | 42 | -3.660  | -2.194 | -6.343  | 0.00 | 0.00 | H |
| ATOM | 664 | HA   | PHE | 42 | -1.538  | -2.400 | -4.658  | 0.00 | 0.00 | H |
| ATOM | 665 | HB2  | PHE | 42 | -3.782  | -1.362 | -4.274  | 0.00 | 0.00 | H |
| ATOM | 666 | HB3  | PHE | 42 | -4.415  | -2.984 | -4.085  | 0.00 | 0.00 | H |
| ATOM | 667 | HD1  | PHE | 42 | -5.300  | -2.658 | -1.886  | 0.00 | 0.00 | H |
| ATOM | 668 | HD2  | PHE | 42 | -1.020  | -2.184 | -2.553  | 0.00 | 0.00 | H |
| ATOM | 669 | HE1  | PHE | 42 | -4.961  | -2.827 | 0.523   | 0.00 | 0.00 | H |
| ATOM | 670 | HE2  | PHE | 42 | -0.595  | -2.322 | -0.203  | 0.00 | 0.00 | H |
| ATOM | 671 | HZ   | PHE | 42 | -2.586  | -2.478 | 1.383   | 0.00 | 0.00 | H |
| ATOM | 672 | N    | ARG | 43 | -3.160  | -5.277 | -4.997  | 0.00 | 0.00 | N |
| ATOM | 673 | CA   | ARG | 43 | -3.033  | -6.742 | -4.953  | 0.00 | 0.00 | C |
| ATOM | 674 | C    | ARG | 43 | -1.922  | -7.318 | -5.799  | 0.00 | 0.00 | C |
| ATOM | 675 | O    | ARG | 43 | -1.345  | -8.331 | -5.395  | 0.00 | 0.00 | O |
| ATOM | 676 | CB   | ARG | 43 | -4.418  | -7.454 | -5.190  | 0.00 | 0.00 | C |
| ATOM | 677 | CG   | ARG | 43 | -5.328  | -7.368 | -3.973  | 0.00 | 0.00 | C |
| ATOM | 678 | CD   | ARG | 43 | -6.609  | -8.185 | -4.165  | 0.00 | 0.00 | C |
| ATOM | 679 | NE   | ARG | 43 | -7.650  | -7.497 | -4.947  | 0.00 | 0.00 | N |
| ATOM | 680 | CZ   | ARG | 43 | -7.848  | -7.496 | -6.220  | 0.00 | 0.00 | C |
| ATOM | 681 | NH1  | ARG | 43 | -7.139  | -8.121 | -7.041  | 0.00 | 0.00 | N |
| ATOM | 682 | NH2  | ARG | 43 | -8.776  | -6.725 | -6.795  | 0.00 | 0.00 | N |
| ATOM | 683 | H    | ARG | 43 | -4.006  | -4.965 | -5.450  | 0.00 | 0.00 | H |
| ATOM | 684 | HA   | ARG | 43 | -2.740  | -7.045 | -3.949  | 0.00 | 0.00 | H |
| ATOM | 685 | HB2  | ARG | 43 | -4.902  | -6.988 | -6.050  | 0.00 | 0.00 | H |
| ATOM | 686 | HB3  | ARG | 43 | -4.307  | -8.529 | -5.326  | 0.00 | 0.00 | H |
| ATOM | 687 | HG2  | ARG | 43 | -4.884  | -7.657 | -3.021  | 0.00 | 0.00 | H |
| ATOM | 688 | HG3  | ARG | 43 | -5.584  | -6.323 | -3.795  | 0.00 | 0.00 | H |
| ATOM | 689 | HD2  | ARG | 43 | -6.482  | -9.207 | -4.526  | 0.00 | 0.00 | H |
| ATOM | 690 | HD3  | ARG | 43 | -7.082  | -8.269 | -3.188  | 0.00 | 0.00 | H |
| ATOM | 691 | HE   | ARG | 43 | -8.275  | -6.865 | -4.469  | 0.00 | 0.00 | H |
| ATOM | 692 | 1HH1 | ARG | 43 | -6.428  | -8.724 | -6.655  | 0.00 | 0.00 | H |
| ATOM | 693 | 2HH1 | ARG | 43 | -7.383  | -8.040 | -8.018  | 0.00 | 0.00 | H |
| ATOM | 694 | 1HH2 | ARG | 43 | -9.572  | -6.430 | -6.249  | 0.00 | 0.00 | H |
| ATOM | 695 | 2HH2 | ARG | 43 | -8.989  | -6.756 | -7.782  | 0.00 | 0.00 | H |
| ATOM | 696 | N    | SER | 44 | -1.516  | -6.601 | -6.947  | 0.00 | 0.00 | N |
| ATOM | 697 | CA   | SER | 44 | -0.351  | -6.965 | -7.788  | 0.00 | 0.00 | C |
| ATOM | 698 | C    | SER | 44 | 0.930   | -6.675 | -7.077  | 0.00 | 0.00 | C |
| ATOM | 699 | O    | SER | 44 | 1.845   | -7.487 | -7.096  | 0.00 | 0.00 | O |
| ATOM | 700 | CB   | SER | 44 | -0.350  | -6.293 | -9.169  | 0.00 | 0.00 | C |
| ATOM | 701 | OG   | SER | 44 | -1.512  | -6.548 | -9.922  | 0.00 | 0.00 | O |
| ATOM | 702 | H    | SER | 44 | -2.101  | -5.800 | -7.140  | 0.00 | 0.00 | H |
| ATOM | 703 | HA   | SER | 44 | -0.428  | -8.031 | -8.002  | 0.00 | 0.00 | H |
| ATOM | 704 | HB2  | SER | 44 | -0.305  | -5.205 | -9.121  | 0.00 | 0.00 | H |
| ATOM | 705 | HB3  | SER | 44 | 0.460   | -6.743 | -9.744  | 0.00 | 0.00 | H |
| ATOM | 706 | HG   | SER | 44 | -2.303  | -6.073 | -9.657  | 0.00 | 0.00 | H |
| ATOM | 707 | N    | TYR | 45 | 1.073   | -5.499 | -6.421  | 0.00 | 0.00 | N |
| ATOM | 708 | CA   | TYR | 45 | 2.179   | -5.052 | -5.588  | 0.00 | 0.00 | C |

|      |     |      |     |    |        |         |         |      |      |   |
|------|-----|------|-----|----|--------|---------|---------|------|------|---|
| ATOM | 709 | C    | TYR | 45 | 2.290  | -6.003  | -4.345  | 0.00 | 0.00 | C |
| ATOM | 710 | O    | TYR | 45 | 3.369  | -6.446  | -4.035  | 0.00 | 0.00 | O |
| ATOM | 711 | CB   | TYR | 45 | 2.056  | -3.585  | -5.193  | 0.00 | 0.00 | C |
| ATOM | 712 | CG   | TYR | 45 | 2.886  | -3.264  | -3.989  | 0.00 | 0.00 | C |
| ATOM | 713 | CD1  | TYR | 45 | 4.246  | -3.030  | -4.140  | 0.00 | 0.00 | C |
| ATOM | 714 | CD2  | TYR | 45 | 2.254  | -3.200  | -2.721  | 0.00 | 0.00 | C |
| ATOM | 715 | CE1  | TYR | 45 | 4.975  | -2.712  | -2.976  | 0.00 | 0.00 | C |
| ATOM | 716 | CE2  | TYR | 45 | 2.928  | -2.828  | -1.557  | 0.00 | 0.00 | C |
| ATOM | 717 | CZ   | TYR | 45 | 4.316  | -2.627  | -1.730  | 0.00 | 0.00 | C |
| ATOM | 718 | OH   | TYR | 45 | 4.993  | -2.494  | -0.585  | 0.00 | 0.00 | O |
| ATOM | 719 | H    | TYR | 45 | 0.318  | -4.873  | -6.659  | 0.00 | 0.00 | H |
| ATOM | 720 | HA   | TYR | 45 | 3.113  | -5.155  | -6.141  | 0.00 | 0.00 | H |
| ATOM | 721 | HB2  | TYR | 45 | 2.345  | -2.860  | -5.952  | 0.00 | 0.00 | H |
| ATOM | 722 | HB3  | TYR | 45 | 1.004  | -3.470  | -4.930  | 0.00 | 0.00 | H |
| ATOM | 723 | HD1  | TYR | 45 | 4.731  | -3.127  | -5.100  | 0.00 | 0.00 | H |
| ATOM | 724 | HD2  | TYR | 45 | 1.226  | -3.508  | -2.601  | 0.00 | 0.00 | H |
| ATOM | 725 | HE1  | TYR | 45 | 6.016  | -2.423  | -2.999  | 0.00 | 0.00 | H |
| ATOM | 726 | HE2  | TYR | 45 | 2.470  | -2.849  | -0.580  | 0.00 | 0.00 | H |
| ATOM | 727 | HH   | TYR | 45 | 5.938  | -2.360  | -0.692  | 0.00 | 0.00 | H |
| ATOM | 728 | N    | VAL | 46 | 1.208  | -6.434  | -3.725  | 0.00 | 0.00 | N |
| ATOM | 729 | CA   | VAL | 46 | 1.312  | -7.277  | -2.568  | 0.00 | 0.00 | C |
| ATOM | 730 | C    | VAL | 46 | 1.729  | -8.682  | -3.007  | 0.00 | 0.00 | C |
| ATOM | 731 | O    | VAL | 46 | 2.660  | -9.146  | -2.353  | 0.00 | 0.00 | O |
| ATOM | 732 | CB   | VAL | 46 | -0.035 | -7.357  | -1.859  | 0.00 | 0.00 | C |
| ATOM | 733 | CG1  | VAL | 46 | -0.219 | -8.529  | -0.882  | 0.00 | 0.00 | C |
| ATOM | 734 | CG2  | VAL | 46 | -0.326 | -6.079  | -1.064  | 0.00 | 0.00 | C |
| ATOM | 735 | H    | VAL | 46 | 0.329  | -6.023  | -4.009  | 0.00 | 0.00 | H |
| ATOM | 736 | HA   | VAL | 46 | 2.072  | -6.944  | -1.860  | 0.00 | 0.00 | H |
| ATOM | 737 | HB   | VAL | 46 | -0.807 | -7.315  | -2.626  | 0.00 | 0.00 | H |
| ATOM | 738 | 1HG1 | VAL | 46 | -0.699 | -9.386  | -1.358  | 0.00 | 0.00 | H |
| ATOM | 739 | 2HG1 | VAL | 46 | 0.723  | -8.820  | -0.417  | 0.00 | 0.00 | H |
| ATOM | 740 | 3HG1 | VAL | 46 | -0.919 | -8.387  | -0.059  | 0.00 | 0.00 | H |
| ATOM | 741 | 1HG2 | VAL | 46 | 0.442  | -5.946  | -0.301  | 0.00 | 0.00 | H |
| ATOM | 742 | 2HG2 | VAL | 46 | -0.283 | -5.218  | -1.730  | 0.00 | 0.00 | H |
| ATOM | 743 | 3HG2 | VAL | 46 | -1.267 | -6.061  | -0.513  | 0.00 | 0.00 | H |
| ATOM | 744 | N    | PHE | 47 | 1.182  | -9.256  | -4.123  | 0.00 | 0.00 | N |
| ATOM | 745 | CA   | PHE | 47 | 1.845  | -10.432 | -4.718  | 0.00 | 0.00 | C |
| ATOM | 746 | C    | PHE | 47 | 3.391  | -10.301 | -5.012  | 0.00 | 0.00 | C |
| ATOM | 747 | O    | PHE | 47 | 4.156  | -11.041 | -4.334  | 0.00 | 0.00 | O |
| ATOM | 748 | CB   | PHE | 47 | 1.023  | -10.798 | -5.964  | 0.00 | 0.00 | C |
| ATOM | 749 | CG   | PHE | 47 | 1.376  | -12.141 | -6.453  | 0.00 | 0.00 | C |
| ATOM | 750 | CD1  | PHE | 47 | 1.163  | -13.264 | -5.658  | 0.00 | 0.00 | C |
| ATOM | 751 | CD2  | PHE | 47 | 2.009  | -12.267 | -7.710  | 0.00 | 0.00 | C |
| ATOM | 752 | CE1  | PHE | 47 | 1.620  | -14.562 | -6.026  | 0.00 | 0.00 | C |
| ATOM | 753 | CE2  | PHE | 47 | 2.399  | -13.581 | -8.095  | 0.00 | 0.00 | C |
| ATOM | 754 | CZ   | PHE | 47 | 2.297  | -14.714 | -7.230  | 0.00 | 0.00 | C |
| ATOM | 755 | H    | PHE | 47 | 0.348  | -8.881  | -4.552  | 0.00 | 0.00 | H |
| ATOM | 756 | HA   | PHE | 47 | 1.696  | -11.177 | -3.936  | 0.00 | 0.00 | H |
| ATOM | 757 | HB2  | PHE | 47 | -0.061 | -10.741 | -5.870  | 0.00 | 0.00 | H |
| ATOM | 758 | HB3  | PHE | 47 | 1.189  | -10.049 | -6.738  | 0.00 | 0.00 | H |
| ATOM | 759 | HD1  | PHE | 47 | 0.624  | -13.170 | -4.726  | 0.00 | 0.00 | H |
| ATOM | 760 | HD2  | PHE | 47 | 2.111  | -11.425 | -8.380  | 0.00 | 0.00 | H |
| ATOM | 761 | HE1  | PHE | 47 | 1.489  | -15.502 | -5.512  | 0.00 | 0.00 | H |
| ATOM | 762 | HE2  | PHE | 47 | 2.844  | -13.739 | -9.068  | 0.00 | 0.00 | H |
| ATOM | 763 | HZ   | PHE | 47 | 2.706  | -15.635 | -7.617  | 0.00 | 0.00 | H |
| ATOM | 764 | N    | TYR | 48 | 3.770  | -9.390  | -5.897  | 0.00 | 0.00 | N |
| ATOM | 765 | CA   | TYR | 48 | 5.146  | -9.302  | -6.310  | 0.00 | 0.00 | C |
| ATOM | 766 | C    | TYR | 48 | 6.177  | -9.097  | -5.258  | 0.00 | 0.00 | C |
| ATOM | 767 | O    | TYR | 48 | 7.182  | -9.834  | -5.238  | 0.00 | 0.00 | O |
| ATOM | 768 | CB   | TYR | 48 | 5.344  | -8.365  | -7.540  | 0.00 | 0.00 | C |
| ATOM | 769 | CG   | TYR | 48 | 4.876  | -8.983  | -8.818  | 0.00 | 0.00 | C |
| ATOM | 770 | CD1  | TYR | 48 | 5.281  | -10.291 | -9.145  | 0.00 | 0.00 | C |
| ATOM | 771 | CD2  | TYR | 48 | 3.896  | -8.387  | -9.621  | 0.00 | 0.00 | C |
| ATOM | 772 | CE1  | TYR | 48 | 4.718  | -10.959 | -10.287 | 0.00 | 0.00 | C |
| ATOM | 773 | CE2  | TYR | 48 | 3.180  | -9.004  | -10.654 | 0.00 | 0.00 | C |
| ATOM | 774 | CZ   | TYR | 48 | 3.567  | -10.377 | -10.958 | 0.00 | 0.00 | C |
| ATOM | 775 | OH   | TYR | 48 | 2.962  | -11.123 | -11.898 | 0.00 | 0.00 | O |
| ATOM | 776 | H    | TYR | 48 | 3.128  | -8.803  | -6.411  | 0.00 | 0.00 | H |
| ATOM | 777 | HA   | TYR | 48 | 5.385  | -10.301 | -6.678  | 0.00 | 0.00 | H |
| ATOM | 778 | HB2  | TYR | 48 | 4.944  | -7.364  | -7.377  | 0.00 | 0.00 | H |
| ATOM | 779 | HB3  | TYR | 48 | 6.407  | -8.200  | -7.715  | 0.00 | 0.00 | H |
| ATOM | 780 | HD1  | TYR | 48 | 6.083  | -10.744 | -8.581  | 0.00 | 0.00 | H |
| ATOM | 781 | HD2  | TYR | 48 | 3.612  | -7.389  | -9.319  | 0.00 | 0.00 | H |
| ATOM | 782 | HE1  | TYR | 48 | 5.126  | -11.889 | -10.653 | 0.00 | 0.00 | H |
| ATOM | 783 | HE2  | TYR | 48 | 2.265  | -8.499  | -10.924 | 0.00 | 0.00 | H |
| ATOM | 784 | HH   | TYR | 48 | 3.444  | -11.953 | -11.863 | 0.00 | 0.00 | H |
| ATOM | 785 | N    | ARG | 49 | 5.894  | -8.197  | -4.311  | 0.00 | 0.00 | N |
| ATOM | 786 | CA   | ARG | 49 | 6.769  | -8.100  | -3.131  | 0.00 | 0.00 | C |
| ATOM | 787 | C    | ARG | 49 | 6.704  | -9.343  | -2.219  | 0.00 | 0.00 | C |
| ATOM | 788 | O    | ARG | 49 | 7.777  | -9.734  | -1.722  | 0.00 | 0.00 | O |
| ATOM | 789 | CB   | ARG | 49 | 6.364  | -6.708  | -2.402  | 0.00 | 0.00 | C |
| ATOM | 790 | CG   | ARG | 49 | 7.259  | -6.541  | -1.165  | 0.00 | 0.00 | C |
| ATOM | 791 | CD   | ARG | 49 | 8.717  | -6.396  | -1.485  | 0.00 | 0.00 | C |
| ATOM | 792 | NE   | ARG | 49 | 9.510  | -6.367  | -0.174  | 0.00 | 0.00 | N |
| ATOM | 793 | CZ   | ARG | 49 | 10.779 | -6.726  | -0.096  | 0.00 | 0.00 | C |
| ATOM | 794 | NH1  | ARG | 49 | 11.463 | -7.056  | -1.076  | 0.00 | 0.00 | N |
| ATOM | 795 | NH2  | ARG | 49 | 11.412 | -6.764  | 0.998   | 0.00 | 0.00 | N |
| ATOM | 796 | H    | ARG | 49 | 5.029  | -7.702  | -4.476  | 0.00 | 0.00 | H |
| ATOM | 797 | HA   | ARG | 49 | 7.810  | -7.996  | -3.436  | 0.00 | 0.00 | H |
| ATOM | 798 | HB2  | ARG | 49 | 6.545  | -5.866  | -3.071  | 0.00 | 0.00 | H |
| ATOM | 799 | HB3  | ARG | 49 | 5.297  | -6.771  | -2.191  | 0.00 | 0.00 | H |
| ATOM | 800 | HG2  | ARG | 49 | 6.783  | -5.749  | -0.586  | 0.00 | 0.00 | H |
| ATOM | 801 | HG3  | ARG | 49 | 7.194  | -7.371  | -0.463  | 0.00 | 0.00 | H |
| ATOM | 802 | HD2  | ARG | 49 | 9.006  | -7.316  | -1.991  | 0.00 | 0.00 | H |
| ATOM | 803 | HD3  | ARG | 49 | 8.964  | -5.504  | -2.060  | 0.00 | 0.00 | H |
| ATOM | 804 | HE   | ARG | 49 | 9.031  | -6.036  | 0.652   | 0.00 | 0.00 | H |
| ATOM | 805 | 1HH1 | ARG | 49 | 11.111 | -7.036  | -2.023  | 0.00 | 0.00 | H |
| ATOM | 806 | 2HH1 | ARG | 49 | 12.324 | -7.550  | -0.895  | 0.00 | 0.00 | H |
| ATOM | 807 | 1HH2 | ARG | 49 | 10.849 | -6.926  | 1.822   | 0.00 | 0.00 | H |
| ATOM | 808 | 2HH2 | ARG | 49 | 12.383 | -7.033  | 1.052   | 0.00 | 0.00 | H |
| ATOM | 809 | N    | HIP | 50 | 5.567  | -10.064 | -2.001  | 0.00 | 0.00 | N |
| ATOM | 810 | CA   | HIP | 50 | 5.561  | -11.242 | -1.098  | 0.00 | 0.00 | C |
| ATOM | 811 | C    | HIP | 50 | 6.338  | -12.388 | -1.716  | 0.00 | 0.00 | C |
| ATOM | 812 | O    | HIP | 50 | 7.124  | -13.006 | -0.985  | 0.00 | 0.00 | O |
| ATOM | 813 | CB   | HIP | 50 | 4.111  | -11.707 | -0.924  | 0.00 | 0.00 | C |

|      |     |      |     |    |        |         |        |      |      |   |
|------|-----|------|-----|----|--------|---------|--------|------|------|---|
| ATOM | 814 | CG   | HIP | 50 | 3.810  | -12.694 | 0.110  | 0.00 | 0.00 | C |
| ATOM | 815 | CD2  | HIP | 50 | 4.142  | -12.671 | 1.455  | 0.00 | 0.00 | C |
| ATOM | 816 | ND1  | HIP | 50 | 2.972  | -13.728 | -0.016 | 0.00 | 0.00 | N |
| ATOM | 817 | CE1  | HIP | 50 | 2.844  | -14.332 | 1.191  | 0.00 | 0.00 | C |
| ATOM | 818 | NE2  | HIP | 50 | 3.584  | -13.688 | 2.124  | 0.00 | 0.00 | N |
| ATOM | 819 | H    | HIP | 50 | 4.702  | -9.669  | -2.341 | 0.00 | 0.00 | H |
| ATOM | 820 | HA   | HIP | 50 | 5.993  | -11.027 | -0.121 | 0.00 | 0.00 | H |
| ATOM | 821 | HB2  | HIP | 50 | 3.602  | -10.795 | -0.609 | 0.00 | 0.00 | H |
| ATOM | 822 | HB3  | HIP | 50 | 3.812  | -12.118 | -1.887 | 0.00 | 0.00 | H |
| ATOM | 823 | HD1  | HIP | 50 | 2.506  | -14.007 | -0.867 | 0.00 | 0.00 | H |
| ATOM | 824 | HD2  | HIP | 50 | 4.623  | -11.827 | 1.926  | 0.00 | 0.00 | H |
| ATOM | 825 | HE1  | HIP | 50 | 2.189  | -15.165 | 1.397  | 0.00 | 0.00 | H |
| ATOM | 826 | HE2  | HIP | 50 | 3.762  | -14.027 | 3.059  | 0.00 | 0.00 | H |
| ATOM | 827 | N    | GLN | 51 | 6.253  | -12.557 | -3.026 | 0.00 | 0.00 | N |
| ATOM | 828 | CA   | GLN | 51 | 7.121  | -13.557 | -3.715 | 0.00 | 0.00 | C |
| ATOM | 829 | C    | GLN | 51 | 8.623  | -13.397 | -3.499 | 0.00 | 0.00 | C |
| ATOM | 830 | O    | GLN | 51 | 9.246  | -14.433 | -3.386 | 0.00 | 0.00 | O |
| ATOM | 831 | CB   | GLN | 51 | 6.741  | -13.587 | -5.178 | 0.00 | 0.00 | C |
| ATOM | 832 | CG   | GLN | 51 | 5.336  | -14.232 | -5.448 | 0.00 | 0.00 | C |
| ATOM | 833 | CD   | GLN | 51 | 4.982  | -15.422 | -4.470 | 0.00 | 0.00 | C |
| ATOM | 834 | NE2  | GLN | 51 | 5.448  | -16.607 | -4.859 | 0.00 | 0.00 | N |
| ATOM | 835 | OE1  | GLN | 51 | 4.373  | -15.224 | -3.491 | 0.00 | 0.00 | O |
| ATOM | 836 | H    | GLN | 51 | 5.461  | -12.162 | -3.513 | 0.00 | 0.00 | H |
| ATOM | 837 | HA   | GLN | 51 | 6.916  | -14.504 | -3.217 | 0.00 | 0.00 | H |
| ATOM | 838 | HB2  | GLN | 51 | 6.682  | -12.560 | -5.535 | 0.00 | 0.00 | H |
| ATOM | 839 | HB3  | GLN | 51 | 7.496  | -14.190 | -5.684 | 0.00 | 0.00 | H |
| ATOM | 840 | HG2  | GLN | 51 | 4.642  | -13.400 | -5.340 | 0.00 | 0.00 | H |
| ATOM | 841 | HG3  | GLN | 51 | 5.176  | -14.521 | -6.488 | 0.00 | 0.00 | H |
| ATOM | 842 | 1HE2 | GLN | 51 | 5.380  | -17.377 | -4.207 | 0.00 | 0.00 | H |
| ATOM | 843 | 2HE2 | GLN | 51 | 5.823  | -16.828 | -5.769 | 0.00 | 0.00 | H |
| ATOM | 844 | N    | GLN | 52 | 9.189  | -12.225 | -3.457 | 0.00 | 0.00 | N |
| ATOM | 845 | CA   | GLN | 52 | 10.575 | -11.946 | -3.214 | 0.00 | 0.00 | C |
| ATOM | 846 | C    | GLN | 52 | 10.872 | -12.305 | -1.712 | 0.00 | 0.00 | C |
| ATOM | 847 | O    | GLN | 52 | 11.882 | -12.927 | -1.287 | 0.00 | 0.00 | O |
| ATOM | 848 | CB   | GLN | 52 | 10.861 | -10.408 | -3.371 | 0.00 | 0.00 | C |
| ATOM | 849 | CG   | GLN | 52 | 10.614 | -9.685  | -4.710 | 0.00 | 0.00 | C |
| ATOM | 850 | CD   | GLN | 52 | 10.734 | -8.119  | -4.652 | 0.00 | 0.00 | C |
| ATOM | 851 | NE2  | GLN | 52 | 10.548 | -7.494  | -5.796 | 0.00 | 0.00 | N |
| ATOM | 852 | OE1  | GLN | 52 | 10.941 | -7.513  | -3.641 | 0.00 | 0.00 | O |
| ATOM | 853 | H    | GLN | 52 | 8.600  | -11.472 | -3.779 | 0.00 | 0.00 | H |
| ATOM | 854 | HA   | GLN | 52 | 11.197 | -12.556 | -3.871 | 0.00 | 0.00 | H |
| ATOM | 855 | HB2  | GLN | 52 | 10.237 | -9.945  | -2.606 | 0.00 | 0.00 | H |
| ATOM | 856 | HB3  | GLN | 52 | 11.894 | -10.119 | -3.172 | 0.00 | 0.00 | H |
| ATOM | 857 | HG2  | GLN | 52 | 11.413 | -10.037 | -5.363 | 0.00 | 0.00 | H |
| ATOM | 858 | HG3  | GLN | 52 | 9.622  | -9.982  | -5.054 | 0.00 | 0.00 | H |
| ATOM | 859 | 1HE2 | GLN | 52 | 10.716 | -6.499  | -5.861 | 0.00 | 0.00 | H |
| ATOM | 860 | 2HE2 | GLN | 52 | 10.771 | -7.983  | -6.652 | 0.00 | 0.00 | H |
| ATOM | 861 | N    | GLU | 53 | 10.013 | -11.984 | -0.811 | 0.00 | 0.00 | N |
| ATOM | 862 | CA   | GLU | 53 | 10.250 | -12.211 | 0.622  | 0.00 | 0.00 | C |
| ATOM | 863 | C    | GLU | 53 | 9.908  | -13.669 | 1.067  | 0.00 | 0.00 | C |
| ATOM | 864 | O    | GLU | 53 | 10.425 | -14.167 | 2.069  | 0.00 | 0.00 | O |
| ATOM | 865 | CB   | GLU | 53 | 9.334  | -11.210 | 1.393  | 0.00 | 0.00 | C |
| ATOM | 866 | CG   | GLU | 53 | 9.809  | -9.833  | 1.088  | 0.00 | 0.00 | C |
| ATOM | 867 | CD   | GLU | 53 | 9.124  | -8.803  | 2.061  | 0.00 | 0.00 | C |
| ATOM | 868 | OE1  | GLU | 53 | 9.881  | -8.151  | 2.834  | 0.00 | 0.00 | O |
| ATOM | 869 | OE2  | GLU | 53 | 7.916  | -8.473  | 1.990  | 0.00 | 0.00 | O |
| ATOM | 870 | H    | GLU | 53 | 9.195  | -11.451 | -1.069 | 0.00 | 0.00 | H |
| ATOM | 871 | HA   | GLU | 53 | 11.287 | -12.050 | 0.919  | 0.00 | 0.00 | H |
| ATOM | 872 | HB2  | GLU | 53 | 8.278  | -11.400 | 1.201  | 0.00 | 0.00 | H |
| ATOM | 873 | HB3  | GLU | 53 | 9.421  | -11.319 | 2.475  | 0.00 | 0.00 | H |
| ATOM | 874 | HG2  | GLU | 53 | 10.888 | -9.926  | 1.207  | 0.00 | 0.00 | H |
| ATOM | 875 | HG3  | GLU | 53 | 9.523  | -9.515  | 0.086  | 0.00 | 0.00 | H |
| ATOM | 876 | N    | GLN | 54 | 9.123  | -14.380 | 0.302  | 0.00 | 0.00 | N |
| ATOM | 877 | CA   | GLN | 54 | 9.093  | -15.841 | 0.388  | 0.00 | 0.00 | C |
| ATOM | 878 | C    | GLN | 54 | 10.324 | -16.454 | -0.250 | 0.00 | 0.00 | C |
| ATOM | 879 | O    | GLN | 54 | 10.613 | -17.648 | -0.079 | 0.00 | 0.00 | O |
| ATOM | 880 | CB   | GLN | 54 | 7.878  | -16.437 | -0.308 | 0.00 | 0.00 | C |
| ATOM | 881 | CG   | GLN | 54 | 6.500  | -16.357 | 0.497  | 0.00 | 0.00 | C |
| ATOM | 882 | CD   | GLN | 54 | 6.483  | -17.255 | 1.739  | 0.00 | 0.00 | C |
| ATOM | 883 | NE2  | GLN | 54 | 5.967  | -18.466 | 1.678  | 0.00 | 0.00 | N |
| ATOM | 884 | OE1  | GLN | 54 | 7.014  | -16.952 | 2.817  | 0.00 | 0.00 | O |
| ATOM | 885 | H    | GLN | 54 | 8.502  | -13.978 | -0.385 | 0.00 | 0.00 | H |
| ATOM | 886 | HA   | GLN | 54 | 9.216  | -16.241 | 1.394  | 0.00 | 0.00 | H |
| ATOM | 887 | HB2  | GLN | 54 | 7.799  | -15.910 | -1.260 | 0.00 | 0.00 | H |
| ATOM | 888 | HB3  | GLN | 54 | 7.976  | -17.506 | -0.492 | 0.00 | 0.00 | H |
| ATOM | 889 | HG2  | GLN | 54 | 6.483  | -15.319 | 0.829  | 0.00 | 0.00 | H |
| ATOM | 890 | HG3  | GLN | 54 | 5.669  | -16.626 | -0.155 | 0.00 | 0.00 | H |
| ATOM | 891 | 1HE2 | GLN | 54 | 5.803  | -19.009 | 2.515  | 0.00 | 0.00 | H |
| ATOM | 892 | 2HE2 | GLN | 54 | 5.478  | -18.760 | 0.845  | 0.00 | 0.00 | H |
| ATOM | 893 | N    | GLU | 55 | 11.129 | -15.652 | -0.901 | 0.00 | 0.00 | N |
| ATOM | 894 | CA   | GLU | 55 | 12.409 | -16.007 | -1.465 | 0.00 | 0.00 | C |
| ATOM | 895 | C    | GLU | 55 | 13.476 | -15.299 | -0.545 | 0.00 | 0.00 | C |
| ATOM | 896 | O    | GLU | 55 | 14.605 | -15.047 | -1.001 | 0.00 | 0.00 | O |
| ATOM | 897 | CB   | GLU | 55 | 12.373 | -15.621 | -2.950 | 0.00 | 0.00 | C |
| ATOM | 898 | CG   | GLU | 55 | 13.510 | -16.179 | -3.749 | 0.00 | 0.00 | C |
| ATOM | 899 | CD   | GLU | 55 | 13.722 | -15.563 | -5.098 | 0.00 | 0.00 | C |
| ATOM | 900 | OE1  | GLU | 55 | 13.406 | -16.205 | -6.148 | 0.00 | 0.00 | O |
| ATOM | 901 | OE2  | GLU | 55 | 14.259 | -14.402 | -5.237 | 0.00 | 0.00 | O |
| ATOM | 902 | H    | GLU | 55 | 10.942 | -14.659 | -0.923 | 0.00 | 0.00 | H |
| ATOM | 903 | HA   | GLU | 55 | 12.515 | -17.082 | -1.328 | 0.00 | 0.00 | H |
| ATOM | 904 | HB2  | GLU | 55 | 11.499 | -16.080 | -3.413 | 0.00 | 0.00 | H |
| ATOM | 905 | HB3  | GLU | 55 | 12.359 | -14.548 | -3.142 | 0.00 | 0.00 | H |
| ATOM | 906 | HG2  | GLU | 55 | 14.464 | -16.040 | -3.239 | 0.00 | 0.00 | H |
| ATOM | 907 | HG3  | GLU | 55 | 13.360 | -17.255 | -3.836 | 0.00 | 0.00 | H |
| ATOM | 908 | N    | ALA | 56 | 13.248 | -15.232 | 0.742  | 0.00 | 0.00 | N |
| ATOM | 909 | CA   | ALA | 56 | 14.249 | -14.798 | 1.679  | 0.00 | 0.00 | C |
| ATOM | 910 | C    | ALA | 56 | 15.430 | -15.755 | 1.822  | 0.00 | 0.00 | C |
| ATOM | 911 | O    | ALA | 56 | 16.512 | -15.260 | 2.050  | 0.00 | 0.00 | O |
| ATOM | 912 | CB   | ALA | 56 | 13.736 | -14.512 | 3.059  | 0.00 | 0.00 | C |
| ATOM | 913 | H    | ALA | 56 | 12.332 | -15.455 | 1.100  | 0.00 | 0.00 | H |
| ATOM | 914 | HA   | ALA | 56 | 14.576 | -13.867 | 1.216  | 0.00 | 0.00 | H |
| ATOM | 915 | HB1  | ALA | 56 | 14.485 | -14.002 | 3.665  | 0.00 | 0.00 | H |
| ATOM | 916 | HB2  | ALA | 56 | 12.806 | -13.944 | 3.056  | 0.00 | 0.00 | H |
| ATOM | 917 | HB3  | ALA | 56 | 13.470 | -15.450 | 3.547  | 0.00 | 0.00 | H |
| ATOM | 918 | N    | GLU | 57 | 15.246 | -17.022 | 1.551  | 0.00 | 0.00 | N |

|      |      |      |     |    |        |         |        |      |      |   |
|------|------|------|-----|----|--------|---------|--------|------|------|---|
| ATOM | 919  | CA   | GLU | 57 | 16.372 | -18.052 | 1.531  | 0.00 | 0.00 | C |
| ATOM | 920  | C    | GLU | 57 | 17.346 | -17.962 | 0.336  | 0.00 | 0.00 | C |
| ATOM | 921  | O    | GLU | 57 | 18.404 | -18.619 | 0.219  | 0.00 | 0.00 | O |
| ATOM | 922  | CB   | GLU | 57 | 15.784 | -19.422 | 1.767  | 0.00 | 0.00 | C |
| ATOM | 923  | CG   | GLU | 57 | 16.607 | -20.749 | 1.996  | 0.00 | 0.00 | C |
| ATOM | 924  | CD   | GLU | 57 | 17.771 | -20.520 | 2.950  | 0.00 | 0.00 | C |
| ATOM | 925  | OE1  | GLU | 57 | 18.979 | -20.684 | 2.602  | 0.00 | 0.00 | O |
| ATOM | 926  | OE2  | GLU | 57 | 17.528 | -20.205 | 4.133  | 0.00 | 0.00 | O |
| ATOM | 927  | H    | GLU | 57 | 14.300 | -17.341 | 1.399  | 0.00 | 0.00 | H |
| ATOM | 928  | HA   | GLU | 57 | 16.973 | -17.803 | 2.407  | 0.00 | 0.00 | H |
| ATOM | 929  | HB2  | GLU | 57 | 15.154 | -19.323 | 2.651  | 0.00 | 0.00 | H |
| ATOM | 930  | HB3  | GLU | 57 | 15.224 | -19.552 | 0.841  | 0.00 | 0.00 | H |
| ATOM | 931  | HG2  | GLU | 57 | 15.942 | -21.509 | 2.404  | 0.00 | 0.00 | H |
| ATOM | 932  | HG3  | GLU | 57 | 17.023 | -21.035 | 1.030  | 0.00 | 0.00 | H |
| ATOM | 933  | N    | GLY | 58 | 16.902 | -17.205 | -0.675 | 0.00 | 0.00 | N |
| ATOM | 934  | CA   | GLY | 58 | 17.474 | -17.335 | -2.070 | 0.00 | 0.00 | C |
| ATOM | 935  | C    | GLY | 58 | 16.599 | -18.230 | -2.998 | 0.00 | 0.00 | C |
| ATOM | 936  | O    | GLY | 58 | 16.763 | -18.268 | -4.199 | 0.00 | 0.00 | O |
| ATOM | 937  | H    | GLY | 58 | 16.038 | -16.712 | -0.496 | 0.00 | 0.00 | H |
| ATOM | 938  | HA2  | GLY | 58 | 17.551 | -16.331 | -2.489 | 0.00 | 0.00 | H |
| ATOM | 939  | HA3  | GLY | 58 | 18.446 | -17.827 | -2.083 | 0.00 | 0.00 | H |
| ATOM | 940  | N    | VAL | 59 | 15.581 | -18.845 | -2.429 | 0.00 | 0.00 | N |
| ATOM | 941  | CA   | VAL | 59 | 14.646 | -19.747 | -3.169 | 0.00 | 0.00 | C |
| ATOM | 942  | C    | VAL | 59 | 13.299 | -19.729 | -2.529 | 0.00 | 0.00 | C |
| ATOM | 943  | O    | VAL | 59 | 13.122 | -19.534 | -1.325 | 0.00 | 0.00 | O |
| ATOM | 944  | CB   | VAL | 59 | 15.180 | -21.253 | -3.139 | 0.00 | 0.00 | C |
| ATOM | 945  | CG1  | VAL | 59 | 16.285 | -21.553 | -4.137 | 0.00 | 0.00 | C |
| ATOM | 946  | CG2  | VAL | 59 | 15.814 | -21.738 | -1.796 | 0.00 | 0.00 | C |
| ATOM | 947  | H    | VAL | 59 | 15.397 | -18.844 | -1.436 | 0.00 | 0.00 | H |
| ATOM | 948  | HA   | VAL | 59 | 14.575 | -19.550 | -4.239 | 0.00 | 0.00 | H |
| ATOM | 949  | HB   | VAL | 59 | 14.351 | -21.905 | -3.415 | 0.00 | 0.00 | H |
| ATOM | 950  | 1HG1 | VAL | 59 | 17.277 | -21.226 | -3.825 | 0.00 | 0.00 | H |
| ATOM | 951  | 2HG1 | VAL | 59 | 16.233 | -22.586 | -4.483 | 0.00 | 0.00 | H |
| ATOM | 952  | 3HG1 | VAL | 59 | 16.082 | -20.901 | -4.986 | 0.00 | 0.00 | H |
| ATOM | 953  | 1HG2 | VAL | 59 | 15.003 | -21.852 | -1.077 | 0.00 | 0.00 | H |
| ATOM | 954  | 2HG2 | VAL | 59 | 16.319 | -22.698 | -1.906 | 0.00 | 0.00 | H |
| ATOM | 955  | 3HG2 | VAL | 59 | 16.590 | -21.044 | -1.473 | 0.00 | 0.00 | H |
| ATOM | 956  | N    | ALA | 60 | 12.307 | -19.750 | -3.388 | 0.00 | 0.00 | N |
| ATOM | 957  | CA   | ALA | 60 | 10.921 | -19.581 | -3.069 | 0.00 | 0.00 | C |
| ATOM | 958  | C    | ALA | 60 | 10.314 | -20.687 | -2.110 | 0.00 | 0.00 | C |
| ATOM | 959  | O    | ALA | 60 | 9.962  | -21.805 | -2.584 | 0.00 | 0.00 | O |
| ATOM | 960  | CB   | ALA | 60 | 10.197 | -19.333 | -4.437 | 0.00 | 0.00 | C |
| ATOM | 961  | H    | ALA | 60 | 12.606 | -19.820 | -4.350 | 0.00 | 0.00 | H |
| ATOM | 962  | HA   | ALA | 60 | 10.802 | -18.605 | -2.599 | 0.00 | 0.00 | H |
| ATOM | 963  | HB1  | ALA | 60 | 10.597 | -18.518 | -5.040 | 0.00 | 0.00 | H |
| ATOM | 964  | HB2  | ALA | 60 | 10.254 | -20.216 | -5.073 | 0.00 | 0.00 | H |
| ATOM | 965  | HB3  | ALA | 60 | 9.173  | -19.005 | -4.256 | 0.00 | 0.00 | H |
| ATOM | 966  | N    | ALA | 61 | 9.987  | -20.283 | -0.874 | 0.00 | 0.00 | N |
| ATOM | 967  | CA   | ALA | 61 | 9.169  | -21.031 | 0.096  | 0.00 | 0.00 | C |
| ATOM | 968  | C    | ALA | 61 | 7.716  | -21.253 | -0.557 | 0.00 | 0.00 | C |
| ATOM | 969  | O    | ALA | 61 | 7.307  | -20.562 | -1.522 | 0.00 | 0.00 | O |
| ATOM | 970  | CB   | ALA | 61 | 9.207  | -20.211 | 1.349  | 0.00 | 0.00 | C |
| ATOM | 971  | H    | ALA | 61 | 10.047 | -19.308 | -0.618 | 0.00 | 0.00 | H |
| ATOM | 972  | HA   | ALA | 61 | 9.598  | -22.024 | 0.235  | 0.00 | 0.00 | H |
| ATOM | 973  | HB1  | ALA | 61 | 9.060  | -19.176 | 1.038  | 0.00 | 0.00 | H |
| ATOM | 974  | HB2  | ALA | 61 | 10.223 | -20.256 | 1.740  | 0.00 | 0.00 | H |
| ATOM | 975  | HB3  | ALA | 61 | 8.486  | -20.438 | 2.134  | 0.00 | 0.00 | H |
| ATOM | 976  | N    | PRO | 62 | 6.986  | -22.259 | -0.074 | 0.00 | 0.00 | N |
| ATOM | 977  | CA   | PRO | 62 | 5.627  | -22.656 | -0.517 | 0.00 | 0.00 | C |
| ATOM | 978  | C    | PRO | 62 | 4.532  | -21.695 | -0.068 | 0.00 | 0.00 | C |
| ATOM | 979  | O    | PRO | 62 | 4.658  | -21.034 | 0.957  | 0.00 | 0.00 | O |
| ATOM | 980  | CB   | PRO | 62 | 5.333  | -24.015 | 0.149  | 0.00 | 0.00 | C |
| ATOM | 981  | CG   | PRO | 62 | 6.594  | -24.442 | 0.846  | 0.00 | 0.00 | C |
| ATOM | 982  | CD   | PRO | 62 | 7.323  | -23.150 | 1.061  | 0.00 | 0.00 | C |
| ATOM | 983  | HA   | PRO | 62 | 5.684  | -22.753 | -1.601 | 0.00 | 0.00 | H |
| ATOM | 984  | HB2  | PRO | 62 | 5.171  | -24.720 | -0.667 | 0.00 | 0.00 | H |
| ATOM | 985  | HB3  | PRO | 62 | 4.590  | -23.891 | 0.938  | 0.00 | 0.00 | H |
| ATOM | 986  | HG2  | PRO | 62 | 6.363  | -24.955 | 1.779  | 0.00 | 0.00 | H |
| ATOM | 987  | HG3  | PRO | 62 | 7.229  | -25.173 | 0.349  | 0.00 | 0.00 | H |
| ATOM | 988  | HD2  | PRO | 62 | 6.980  | -22.638 | 1.959  | 0.00 | 0.00 | H |
| ATOM | 989  | HD3  | PRO | 62 | 8.381  | -23.342 | 1.243  | 0.00 | 0.00 | H |
| ATOM | 990  | N    | ALA | 63 | 3.412  | -21.626 | -0.775 | 0.00 | 0.00 | N |
| ATOM | 991  | CA   | ALA | 63 | 2.265  | -20.802 | -0.386 | 0.00 | 0.00 | C |
| ATOM | 992  | C    | ALA | 63 | 1.421  | -21.291 | 0.791  | 0.00 | 0.00 | C |
| ATOM | 993  | O    | ALA | 63 | 1.441  | -22.484 | 1.123  | 0.00 | 0.00 | O |
| ATOM | 994  | CB   | ALA | 63 | 1.387  | -20.479 | -1.600 | 0.00 | 0.00 | C |
| ATOM | 995  | H    | ALA | 63 | 3.375  | -22.188 | -1.615 | 0.00 | 0.00 | H |
| ATOM | 996  | HA   | ALA | 63 | 2.782  | -19.873 | -0.148 | 0.00 | 0.00 | H |
| ATOM | 997  | HB1  | ALA | 63 | 0.610  | -19.725 | -1.484 | 0.00 | 0.00 | H |
| ATOM | 998  | HB2  | ALA | 63 | 2.079  | -20.080 | -2.342 | 0.00 | 0.00 | H |
| ATOM | 999  | HB3  | ALA | 63 | 0.901  | -21.401 | -1.917 | 0.00 | 0.00 | H |
| ATOM | 1000 | N    | ASP | 64 | 0.655  | -20.403 | 1.465  | 0.00 | 0.00 | N |
| ATOM | 1001 | CA   | ASP | 64 | -0.208 | -20.659 | 2.600  | 0.00 | 0.00 | C |
| ATOM | 1002 | C    | ASP | 64 | -1.669 | -20.588 | 2.175  | 0.00 | 0.00 | C |
| ATOM | 1003 | O    | ASP | 64 | -1.985 | -19.516 | 1.644  | 0.00 | 0.00 | O |
| ATOM | 1004 | CB   | ASP | 64 | 0.163  | -19.688 | 3.726  | 0.00 | 0.00 | C |
| ATOM | 1005 | CG   | ASP | 64 | -0.604 | -20.074 | 5.009  | 0.00 | 0.00 | C |
| ATOM | 1006 | OD1  | ASP | 64 | -0.828 | -21.237 | 5.313  | 0.00 | 0.00 | O |
| ATOM | 1007 | OD2  | ASP | 64 | -0.864 | -19.173 | 5.793  | 0.00 | 0.00 | O |
| ATOM | 1008 | H    | ASP | 64 | 0.797  | -19.416 | 1.310  | 0.00 | 0.00 | H |
| ATOM | 1009 | HA   | ASP | 64 | 0.085  | -21.609 | 3.049  | 0.00 | 0.00 | H |
| ATOM | 1010 | HB2  | ASP | 64 | 1.212  | -19.906 | 3.930  | 0.00 | 0.00 | H |
| ATOM | 1011 | HB3  | ASP | 64 | -0.024 | -18.646 | 3.467  | 0.00 | 0.00 | H |
| ATOM | 1012 | N    | PRO | 65 | -2.354 | -21.717 | 2.126  | 0.00 | 0.00 | N |
| ATOM | 1013 | CA   | PRO | 65 | -3.523 | -21.776 | 1.352  | 0.00 | 0.00 | C |
| ATOM | 1014 | C    | PRO | 65 | -4.608 | -20.730 | 1.525  | 0.00 | 0.00 | C |
| ATOM | 1015 | O    | PRO | 65 | -5.188 | -20.324 | 0.534  | 0.00 | 0.00 | O |
| ATOM | 1016 | CB   | PRO | 65 | -4.047 | -23.210 | 1.400  | 0.00 | 0.00 | C |
| ATOM | 1017 | CG   | PRO | 65 | -2.720 | -24.077 | 1.594  | 0.00 | 0.00 | C |
| ATOM | 1018 | CD   | PRO | 65 | -1.923 | -23.091 | 2.422  | 0.00 | 0.00 | C |
| ATOM | 1019 | HA   | PRO | 65 | -3.183 | -21.613 | 0.328  | 0.00 | 0.00 | H |
| ATOM | 1020 | HB2  | PRO | 65 | -4.647 | -23.417 | 0.515  | 0.00 | 0.00 | H |
| ATOM | 1021 | HB3  | PRO | 65 | -4.554 | -23.365 | 2.352  | 0.00 | 0.00 | H |
| ATOM | 1022 | HG2  | PRO | 65 | -2.926 | -25.005 | 2.125  | 0.00 | 0.00 | H |
| ATOM | 1023 | HG3  | PRO | 65 | -2.181 | -24.141 | 0.649  | 0.00 | 0.00 | H |

|      |      |      |     |    |         |         |         |      |      |   |
|------|------|------|-----|----|---------|---------|---------|------|------|---|
| ATOM | 1024 | HD2  | PRO | 65 | -2.049  | -23.294 | 3.486   | 0.00 | 0.00 | H |
| ATOM | 1025 | HD3  | PRO | 65 | -0.889  | -23.269 | 2.123   | 0.00 | 0.00 | H |
| ATOM | 1026 | N    | GLU | 66 | -4.753  | -20.117 | 2.668   | 0.00 | 0.00 | N |
| ATOM | 1027 | CA   | GLU | 66 | -5.692  | -18.976 | 2.987   | 0.00 | 0.00 | C |
| ATOM | 1028 | C    | GLU | 66 | -5.309  | -17.585 | 2.412   | 0.00 | 0.00 | C |
| ATOM | 1029 | O    | GLU | 66 | -6.243  | -16.762 | 2.357   | 0.00 | 0.00 | O |
| ATOM | 1030 | CB   | GLU | 66 | -5.871  | -18.884 | 4.550   | 0.00 | 0.00 | C |
| ATOM | 1031 | CG   | GLU | 66 | -6.684  | -20.076 | 5.172   | 0.00 | 0.00 | C |
| ATOM | 1032 | CD   | GLU | 66 | -8.044  | -20.364 | 4.542   | 0.00 | 0.00 | C |
| ATOM | 1033 | OE1  | GLU | 66 | -8.738  | -19.402 | 4.104   | 0.00 | 0.00 | O |
| ATOM | 1034 | OE2  | GLU | 66 | -8.443  | -21.561 | 4.476   | 0.00 | 0.00 | O |
| ATOM | 1035 | H    | GLU | 66 | -4.175  | -20.367 | 3.458   | 0.00 | 0.00 | H |
| ATOM | 1036 | HA   | GLU | 66 | -6.654  | -19.241 | 2.547   | 0.00 | 0.00 | H |
| ATOM | 1037 | HB2  | GLU | 66 | -4.870  | -18.875 | 4.978   | 0.00 | 0.00 | H |
| ATOM | 1038 | HB3  | GLU | 66 | -6.396  | -17.975 | 4.843   | 0.00 | 0.00 | H |
| ATOM | 1039 | HG2  | GLU | 66 | -6.124  | -21.005 | 5.072   | 0.00 | 0.00 | H |
| ATOM | 1040 | HG3  | GLU | 66 | -6.908  | -19.976 | 6.235   | 0.00 | 0.00 | H |
| ATOM | 1041 | N    | MET | 67 | -4.152  | -17.454 | 1.776   | 0.00 | 0.00 | N |
| ATOM | 1042 | CA   | MET | 67 | -3.796  | -16.356 | 0.901   | 0.00 | 0.00 | C |
| ATOM | 1043 | C    | MET | 67 | -3.921  | -16.587 | -0.655  | 0.00 | 0.00 | C |
| ATOM | 1044 | O    | MET | 67 | -4.014  | -15.642 | -1.411  | 0.00 | 0.00 | O |
| ATOM | 1045 | CB   | MET | 67 | -2.437  | -15.768 | 1.328   | 0.00 | 0.00 | C |
| ATOM | 1046 | CG   | MET | 67 | -2.009  | -14.535 | 0.552   | 0.00 | 0.00 | C |
| ATOM | 1047 | SD   | MET | 67 | -0.723  | -13.530 | 1.358   | 0.00 | 0.00 | S |
| ATOM | 1048 | CE   | MET | 67 | -0.405  | -12.215 | 0.125   | 0.00 | 0.00 | C |
| ATOM | 1049 | H    | MET | 67 | -3.543  | -18.259 | 1.775   | 0.00 | 0.00 | H |
| ATOM | 1050 | HA   | MET | 67 | -4.551  | -15.570 | 0.935   | 0.00 | 0.00 | H |
| ATOM | 1051 | HB2  | MET | 67 | -2.518  | -15.426 | 2.360   | 0.00 | 0.00 | H |
| ATOM | 1052 | HB3  | MET | 67 | -1.649  | -16.512 | 1.201   | 0.00 | 0.00 | H |
| ATOM | 1053 | HG2  | MET | 67 | -1.565  | -14.746 | -0.421  | 0.00 | 0.00 | H |
| ATOM | 1054 | HG3  | MET | 67 | -2.894  | -13.915 | 0.416   | 0.00 | 0.00 | H |
| ATOM | 1055 | HE1  | MET | 67 | -1.239  | -11.528 | -0.013  | 0.00 | 0.00 | H |
| ATOM | 1056 | HE2  | MET | 67 | 0.365   | -11.479 | 0.353   | 0.00 | 0.00 | H |
| ATOM | 1057 | HE3  | MET | 67 | -0.176  | -12.774 | -0.783  | 0.00 | 0.00 | H |
| ATOM | 1058 | N    | VAL | 68 | -3.954  | -17.838 | -1.100  | 0.00 | 0.00 | N |
| ATOM | 1059 | CA   | VAL | 68 | -3.979  | -18.145 | -2.542  | 0.00 | 0.00 | C |
| ATOM | 1060 | C    | VAL | 68 | -5.385  | -17.883 | -3.084  | 0.00 | 0.00 | C |
| ATOM | 1061 | O    | VAL | 68 | -5.568  | -17.732 | -4.286  | 0.00 | 0.00 | O |
| ATOM | 1062 | CB   | VAL | 68 | -3.595  | -19.648 | -2.703  | 0.00 | 0.00 | C |
| ATOM | 1063 | CG1  | VAL | 68 | -3.831  | -20.321 | -4.059  | 0.00 | 0.00 | C |
| ATOM | 1064 | CG2  | VAL | 68 | -2.129  | -19.984 | -2.363  | 0.00 | 0.00 | C |
| ATOM | 1065 | H    | VAL | 68 | -3.660  | -18.528 | -0.423  | 0.00 | 0.00 | H |
| ATOM | 1066 | HA   | VAL | 68 | -3.238  | -17.554 | -3.080  | 0.00 | 0.00 | H |
| ATOM | 1067 | HB   | VAL | 68 | -4.169  | -20.179 | -1.943  | 0.00 | 0.00 | H |
| ATOM | 1068 | 1HG1 | VAL | 68 | -4.865  | -20.226 | -4.389  | 0.00 | 0.00 | H |
| ATOM | 1069 | 2HG1 | VAL | 68 | -3.101  | -19.886 | -4.741  | 0.00 | 0.00 | H |
| ATOM | 1070 | 3HG1 | VAL | 68 | -3.732  | -21.385 | -3.846  | 0.00 | 0.00 | H |
| ATOM | 1071 | 1HG2 | VAL | 68 | -1.410  | -19.319 | -2.841  | 0.00 | 0.00 | H |
| ATOM | 1072 | 2HG2 | VAL | 68 | -1.943  | -19.724 | -1.321  | 0.00 | 0.00 | H |
| ATOM | 1073 | 3HG2 | VAL | 68 | -2.013  | -21.049 | -2.564  | 0.00 | 0.00 | H |
| ATOM | 1074 | N    | THR | 69 | -6.366  | -17.725 | -2.176  | 0.00 | 0.00 | N |
| ATOM | 1075 | CA   | THR | 69 | -7.764  | -17.334 | -2.446  | 0.00 | 0.00 | C |
| ATOM | 1076 | C    | THR | 69 | -7.901  | -15.931 | -2.941  | 0.00 | 0.00 | C |
| ATOM | 1077 | O    | THR | 69 | -9.005  | -15.622 | -3.422  | 0.00 | 0.00 | O |
| ATOM | 1078 | CB   | THR | 69 | -8.495  | -17.485 | -1.117  | 0.00 | 0.00 | C |
| ATOM | 1079 | CG2  | THR | 69 | -8.430  | -18.871 | -0.509  | 0.00 | 0.00 | C |
| ATOM | 1080 | OG1  | THR | 69 | -7.882  | -16.693 | -0.155  | 0.00 | 0.00 | O |
| ATOM | 1081 | H    | THR | 69 | -6.040  | -18.004 | -1.263  | 0.00 | 0.00 | H |
| ATOM | 1082 | HA   | THR | 69 | -8.237  | -17.938 | -3.220  | 0.00 | 0.00 | H |
| ATOM | 1083 | HB   | THR | 69 | -9.535  | -17.205 | -1.283  | 0.00 | 0.00 | H |
| ATOM | 1084 | HG1  | THR | 69 | -8.398  | -16.975 | 0.604   | 0.00 | 0.00 | H |
| ATOM | 1085 | 1HG2 | THR | 69 | -8.782  | -19.537 | -1.297  | 0.00 | 0.00 | H |
| ATOM | 1086 | 2HG2 | THR | 69 | -7.466  | -19.119 | -0.063  | 0.00 | 0.00 | H |
| ATOM | 1087 | 3HG2 | THR | 69 | -9.164  | -18.934 | 0.294   | 0.00 | 0.00 | H |
| ATOM | 1088 | N    | LEU | 70 | -6.889  | -15.017 | -2.748  | 0.00 | 0.00 | N |
| ATOM | 1089 | CA   | LEU | 70 | -6.857  | -13.589 | -3.206  | 0.00 | 0.00 | C |
| ATOM | 1090 | C    | LEU | 70 | -6.701  | -13.499 | -4.748  | 0.00 | 0.00 | C |
| ATOM | 1091 | O    | LEU | 70 | -5.756  | -13.960 | -5.362  | 0.00 | 0.00 | O |
| ATOM | 1092 | CB   | LEU | 70 | -5.716  | -13.044 | -2.446  | 0.00 | 0.00 | C |
| ATOM | 1093 | CG   | LEU | 70 | -5.862  | -11.536 | -2.302  | 0.00 | 0.00 | C |
| ATOM | 1094 | CD1  | LEU | 70 | -6.906  | -10.975 | -1.394  | 0.00 | 0.00 | C |
| ATOM | 1095 | CD2  | LEU | 70 | -4.530  | -10.825 | -1.909  | 0.00 | 0.00 | C |
| ATOM | 1096 | H    | LEU | 70 | -5.969  | -15.417 | -2.629  | 0.00 | 0.00 | H |
| ATOM | 1097 | HA   | LEU | 70 | -7.800  | -13.141 | -2.895  | 0.00 | 0.00 | H |
| ATOM | 1098 | HB2  | LEU | 70 | -5.839  | -13.451 | -1.444  | 0.00 | 0.00 | H |
| ATOM | 1099 | HB3  | LEU | 70 | -4.800  | -13.250 | -3.003  | 0.00 | 0.00 | H |
| ATOM | 1100 | HG   | LEU | 70 | -6.011  | -11.177 | -3.320  | 0.00 | 0.00 | H |
| ATOM | 1101 | 1HD1 | LEU | 70 | -7.861  | -11.354 | -1.759  | 0.00 | 0.00 | H |
| ATOM | 1102 | 2HD1 | LEU | 70 | -6.814  | -11.352 | -0.376  | 0.00 | 0.00 | H |
| ATOM | 1103 | 3HD1 | LEU | 70 | -6.842  | -9.888  | -1.346  | 0.00 | 0.00 | H |
| ATOM | 1104 | 1HD2 | LEU | 70 | -4.573  | -9.740  | -2.011  | 0.00 | 0.00 | H |
| ATOM | 1105 | 2HD2 | LEU | 70 | -4.193  | -11.255 | -0.967  | 0.00 | 0.00 | H |
| ATOM | 1106 | 3HD2 | LEU | 70 | -3.821  | -11.137 | -2.676  | 0.00 | 0.00 | H |
| ATOM | 1107 | N    | PRO | 71 | -7.676  | -12.822 | -5.418  | 0.00 | 0.00 | N |
| ATOM | 1108 | CA   | PRO | 71 | -7.691  | -12.709 | -6.893  | 0.00 | 0.00 | C |
| ATOM | 1109 | C    | PRO | 71 | -6.536  | -11.761 | -7.297  | 0.00 | 0.00 | C |
| ATOM | 1110 | O    | PRO | 71 | -6.205  | -10.750 | -6.707  | 0.00 | 0.00 | O |
| ATOM | 1111 | CB   | PRO | 71 | -9.065  | -12.142 | -7.294  | 0.00 | 0.00 | C |
| ATOM | 1112 | CG   | PRO | 71 | -9.350  | -11.338 | -6.031  | 0.00 | 0.00 | C |
| ATOM | 1113 | CD   | PRO | 71 | -8.681  | -11.955 | -4.885  | 0.00 | 0.00 | C |
| ATOM | 1114 | HA   | PRO | 71 | -7.636  | -13.714 | -7.313  | 0.00 | 0.00 | H |
| ATOM | 1115 | HB2  | PRO | 71 | -9.769  | -12.971 | -7.342  | 0.00 | 0.00 | H |
| ATOM | 1116 | HB3  | PRO | 71 | -9.052  | -11.565 | -8.220  | 0.00 | 0.00 | H |
| ATOM | 1117 | HG2  | PRO | 71 | -8.834  | -10.397 | -6.225  | 0.00 | 0.00 | H |
| ATOM | 1118 | HG3  | PRO | 71 | -10.387 | -11.019 | -5.909  | 0.00 | 0.00 | H |
| ATOM | 1119 | HD2  | PRO | 71 | -8.207  | -11.191 | -4.269  | 0.00 | 0.00 | H |
| ATOM | 1120 | HD3  | PRO | 71 | -9.411  | -12.463 | -4.254  | 0.00 | 0.00 | H |
| ATOM | 1121 | N    | LEU | 72 | -5.927  | -12.123 | -8.421  | 0.00 | 0.00 | N |
| ATOM | 1122 | CA   | LEU | 72 | -4.721  | -11.536 | -9.046  | 0.00 | 0.00 | C |
| ATOM | 1123 | C    | LEU | 72 | -4.792  | -11.604 | -10.608 | 0.00 | 0.00 | C |
| ATOM | 1124 | O    | LEU | 72 | -4.861  | -12.735 | -11.093 | 0.00 | 0.00 | O |
| ATOM | 1125 | CB   | LEU | 72 | -3.424  | -12.158 | -8.530  | 0.00 | 0.00 | C |
| ATOM | 1126 | CG   | LEU | 72 | -3.175  | -12.101 | -6.995  | 0.00 | 0.00 | C |
| ATOM | 1127 | CD1  | LEU | 72 | -1.938  | -12.960 | -6.730  | 0.00 | 0.00 | C |
| ATOM | 1128 | CD2  | LEU | 72 | -2.885  | -10.659 | -6.559  | 0.00 | 0.00 | C |

|      |      |      |     |    |        |         |         |      |      |   |
|------|------|------|-----|----|--------|---------|---------|------|------|---|
| ATOM | 1129 | H    | LEU | 72 | -6.182 | -12.948 | -8.946  | 0.00 | 0.00 | H |
| ATOM | 1130 | HA   | LEU | 72 | -4.719 | -10.496 | -8.719  | 0.00 | 0.00 | H |
| ATOM | 1131 | HB2  | LEU | 72 | -3.439 | -13.231 | -8.726  | 0.00 | 0.00 | H |
| ATOM | 1132 | HB3  | LEU | 72 | -2.599 | -11.725 | -9.095  | 0.00 | 0.00 | H |
| ATOM | 1133 | HG   | LEU | 72 | -4.038 | -12.546 | -6.501  | 0.00 | 0.00 | H |
| ATOM | 1134 | 1HD1 | LEU | 72 | -1.786 | -12.879 | -5.653  | 0.00 | 0.00 | H |
| ATOM | 1135 | 2HD1 | LEU | 72 | -1.051 | -12.543 | -7.205  | 0.00 | 0.00 | H |
| ATOM | 1136 | 3HD1 | LEU | 72 | -1.946 | -14.045 | -6.837  | 0.00 | 0.00 | H |
| ATOM | 1137 | 1HD2 | LEU | 72 | -2.523 | -10.620 | -5.533  | 0.00 | 0.00 | H |
| ATOM | 1138 | 2HD2 | LEU | 72 | -3.787 | -10.054 | -6.653  | 0.00 | 0.00 | H |
| ATOM | 1139 | 3HD2 | LEU | 72 | -2.082 | -10.238 | -7.164  | 0.00 | 0.00 | H |
| ATOM | 1140 | N    | GLN | 73 | -4.593 | -10.512 | -11.296 | 0.00 | 0.00 | N |
| ATOM | 1141 | CA   | GLN | 73 | -4.438 | -10.387 | -12.700 | 0.00 | 0.00 | C |
| ATOM | 1142 | C    | GLN | 73 | -3.029 | -10.016 | -13.062 | 0.00 | 0.00 | C |
| ATOM | 1143 | O    | GLN | 73 | -2.617 | -8.838  | -12.968 | 0.00 | 0.00 | O |
| ATOM | 1144 | CB   | GLN | 73 | -5.456 | -9.379  | -13.229 | 0.00 | 0.00 | C |
| ATOM | 1145 | CG   | GLN | 73 | -6.803 | -10.076 | -13.509 | 0.00 | 0.00 | C |
| ATOM | 1146 | CD   | GLN | 73 | -7.891 | -9.010  | -13.517 | 0.00 | 0.00 | C |
| ATOM | 1147 | NE2  | GLN | 73 | -8.920 | -9.148  | -12.680 | 0.00 | 0.00 | N |
| ATOM | 1148 | OE1  | GLN | 73 | -7.895 | -8.024  | -14.289 | 0.00 | 0.00 | O |
| ATOM | 1149 | H    | GLN | 73 | -4.541 | -9.685  | -10.720 | 0.00 | 0.00 | H |
| ATOM | 1150 | HA   | GLN | 73 | -4.750 | -11.335 | -13.137 | 0.00 | 0.00 | H |
| ATOM | 1151 | HB2  | GLN | 73 | -5.684 | -8.641  | -12.460 | 0.00 | 0.00 | H |
| ATOM | 1152 | HB3  | GLN | 73 | -5.173 | -8.857  | -14.143 | 0.00 | 0.00 | H |
| ATOM | 1153 | HG2  | GLN | 73 | -6.718 | -10.530 | -14.497 | 0.00 | 0.00 | H |
| ATOM | 1154 | HG3  | GLN | 73 | -7.048 | -10.821 | -12.752 | 0.00 | 0.00 | H |
| ATOM | 1155 | 1HE2 | GLN | 73 | -8.944 | -9.832  | -11.936 | 0.00 | 0.00 | H |
| ATOM | 1156 | 2HE2 | GLN | 73 | -9.495 | -8.328  | -12.561 | 0.00 | 0.00 | H |
| ATOM | 1157 | N    | PRO | 74 | -2.153 | -11.018 | -13.441 | 0.00 | 0.00 | N |
| ATOM | 1158 | CA   | PRO | 74 | -0.744 | -10.716 | -13.902 | 0.00 | 0.00 | C |
| ATOM | 1159 | C    | PRO | 74 | -0.723 | -10.161 | -15.295 | 0.00 | 0.00 | C |
| ATOM | 1160 | O    | PRO | 74 | 0.151  | -9.331  | -15.488 | 0.00 | 0.00 | O |
| ATOM | 1161 | CB   | PRO | 74 | -0.106 | -12.178 | -13.830 | 0.00 | 0.00 | C |
| ATOM | 1162 | CG   | PRO | 74 | -1.222 | -13.189 | -13.904 | 0.00 | 0.00 | C |
| ATOM | 1163 | CD   | PRO | 74 | -2.326 | -12.460 | -13.170 | 0.00 | 0.00 | C |
| ATOM | 1164 | HA   | PRO | 74 | -0.186 | -10.081 | -13.213 | 0.00 | 0.00 | H |
| ATOM | 1165 | HB2  | PRO | 74 | 0.426  | -12.338 | -12.891 | 0.00 | 0.00 | H |
| ATOM | 1166 | HB3  | PRO | 74 | 0.650  | -12.308 | -14.605 | 0.00 | 0.00 | H |
| ATOM | 1167 | HG2  | PRO | 74 | -1.528 | -13.353 | -14.938 | 0.00 | 0.00 | H |
| ATOM | 1168 | HG3  | PRO | 74 | -0.977 | -14.157 | -13.468 | 0.00 | 0.00 | H |
| ATOM | 1169 | HD2  | PRO | 74 | -3.221 | -12.985 | -13.503 | 0.00 | 0.00 | H |
| ATOM | 1170 | HD3  | PRO | 74 | -2.264 | -12.550 | -12.085 | 0.00 | 0.00 | H |
| ATOM | 1171 | N    | SER | 75 | -1.662 | -10.573 | -16.169 | 0.00 | 0.00 | N |
| ATOM | 1172 | CA   | SER | 75 | -1.507 | -10.309 | -17.596 | 0.00 | 0.00 | C |
| ATOM | 1173 | C    | SER | 75 | -1.787 | -8.916  | -18.079 | 0.00 | 0.00 | C |
| ATOM | 1174 | O    | SER | 75 | -1.384 | -8.605  | -19.157 | 0.00 | 0.00 | O |
| ATOM | 1175 | CB   | SER | 75 | -2.463 | -11.211 | -18.422 | 0.00 | 0.00 | C |
| ATOM | 1176 | OG   | SER | 75 | -2.457 | -12.520 | -17.938 | 0.00 | 0.00 | O |
| ATOM | 1177 | H    | SER | 75 | -2.586 | -10.875 | -15.895 | 0.00 | 0.00 | H |
| ATOM | 1178 | HA   | SER | 75 | -0.523 | -10.476 | -18.036 | 0.00 | 0.00 | H |
| ATOM | 1179 | HB2  | SER | 75 | -3.434 | -10.720 | -18.481 | 0.00 | 0.00 | H |
| ATOM | 1180 | HB3  | SER | 75 | -2.076 | -11.202 | -19.439 | 0.00 | 0.00 | H |
| ATOM | 1181 | HG   | SER | 75 | -1.687 | -12.969 | -18.293 | 0.00 | 0.00 | H |
| ATOM | 1182 | N    | SER | 76 | -2.509 | -8.062  | -17.334 | 0.00 | 0.00 | N |
| ATOM | 1183 | CA   | SER | 76 | -2.929 | -6.683  | -17.611 | 0.00 | 0.00 | C |
| ATOM | 1184 | C    | SER | 76 | -1.829 | -5.674  | -17.343 | 0.00 | 0.00 | C |
| ATOM | 1185 | O    | SER | 76 | -0.833 | -5.950  | -16.602 | 0.00 | 0.00 | O |
| ATOM | 1186 | CB   | SER | 76 | -4.124 | -6.400  | -16.791 | 0.00 | 0.00 | C |
| ATOM | 1187 | OG   | SER | 76 | -3.835 | -5.971  | -15.453 | 0.00 | 0.00 | O |
| ATOM | 1188 | H    | SER | 76 | -2.897 | -8.447  | -16.486 | 0.00 | 0.00 | H |
| ATOM | 1189 | HA   | SER | 76 | -3.202 | -6.537  | -18.656 | 0.00 | 0.00 | H |
| ATOM | 1190 | HB2  | SER | 76 | -4.706 | -5.621  | -17.287 | 0.00 | 0.00 | H |
| ATOM | 1191 | HB3  | SER | 76 | -4.694 | -7.320  | -16.657 | 0.00 | 0.00 | H |
| ATOM | 1192 | HG   | SER | 76 | -4.668 | -5.967  | -14.977 | 0.00 | 0.00 | H |
| ATOM | 1193 | N    | THR | 77 | -2.030 | -4.440  | -17.821 | 0.00 | 0.00 | N |
| ATOM | 1194 | CA   | THR | 77 | -1.217 | -3.283  | -17.413 | 0.00 | 0.00 | C |
| ATOM | 1195 | C    | THR | 77 | -1.323 | -2.878  | -15.951 | 0.00 | 0.00 | C |
| ATOM | 1196 | O    | THR | 77 | -0.370 | -2.207  | -15.506 | 0.00 | 0.00 | O |
| ATOM | 1197 | CB   | THR | 77 | -1.456 | -1.987  | -18.207 | 0.00 | 0.00 | C |
| ATOM | 1198 | CG2  | THR | 77 | -0.886 | -2.215  | -19.646 | 0.00 | 0.00 | C |
| ATOM | 1199 | OG1  | THR | 77 | -2.800 | -1.544  | -18.146 | 0.00 | 0.00 | O |
| ATOM | 1200 | H    | THR | 77 | -2.763 | -4.322  | -18.507 | 0.00 | 0.00 | H |
| ATOM | 1201 | HA   | THR | 77 | -0.160 | -3.461  | -17.608 | 0.00 | 0.00 | H |
| ATOM | 1202 | HB   | THR | 77 | -0.998 | -1.183  | -17.630 | 0.00 | 0.00 | H |
| ATOM | 1203 | HG1  | THR | 77 | -3.425 | -2.229  | -18.393 | 0.00 | 0.00 | H |
| ATOM | 1204 | 1HG2 | THR | 77 | -1.678 | -2.150  | -20.391 | 0.00 | 0.00 | H |
| ATOM | 1205 | 2HG2 | THR | 77 | -0.434 | -3.158  | -19.955 | 0.00 | 0.00 | H |
| ATOM | 1206 | 3HG2 | THR | 77 | -0.159 | -1.428  | -19.850 | 0.00 | 0.00 | H |
| ATOM | 1207 | N    | MET | 78 | -2.277 | -3.327  | -15.108 | 0.00 | 0.00 | N |
| ATOM | 1208 | CA   | MET | 78 | -2.244 | -3.085  | -13.692 | 0.00 | 0.00 | C |
| ATOM | 1209 | C    | MET | 78 | -1.327 | -4.178  | -13.068 | 0.00 | 0.00 | C |
| ATOM | 1210 | O    | MET | 78 | -0.569 | -3.890  | -12.131 | 0.00 | 0.00 | O |
| ATOM | 1211 | CB   | MET | 78 | -3.677 | -3.000  | -13.124 | 0.00 | 0.00 | C |
| ATOM | 1212 | CG   | MET | 78 | -4.539 | -1.957  | -13.780 | 0.00 | 0.00 | C |
| ATOM | 1213 | SD   | MET | 78 | -3.848 | -0.306  | -13.752 | 0.00 | 0.00 | S |
| ATOM | 1214 | CE   | MET | 78 | -4.790 | 0.628   | -15.054 | 0.00 | 0.00 | C |
| ATOM | 1215 | H    | MET | 78 | -2.962 | -3.956  | -15.502 | 0.00 | 0.00 | H |
| ATOM | 1216 | HA   | MET | 78 | -1.712 | -2.169  | -13.432 | 0.00 | 0.00 | H |
| ATOM | 1217 | HB2  | MET | 78 | -4.142 | -3.972  | -13.288 | 0.00 | 0.00 | H |
| ATOM | 1218 | HB3  | MET | 78 | -3.680 | -2.753  | -12.063 | 0.00 | 0.00 | H |
| ATOM | 1219 | HG2  | MET | 78 | -4.685 | -2.243  | -14.822 | 0.00 | 0.00 | H |
| ATOM | 1220 | HG3  | MET | 78 | -5.494 | -1.927  | -13.254 | 0.00 | 0.00 | H |
| ATOM | 1221 | HE1  | MET | 78 | -4.661 | 0.220   | -16.057 | 0.00 | 0.00 | H |
| ATOM | 1222 | HE2  | MET | 78 | -5.822 | 0.823   | -14.765 | 0.00 | 0.00 | H |
| ATOM | 1223 | HE3  | MET | 78 | -4.373 | 1.635   | -15.069 | 0.00 | 0.00 | H |
| ATOM | 1224 | N    | GLY | 79 | -1.246 | -5.377  | -13.692 | 0.00 | 0.00 | N |
| ATOM | 1225 | CA   | GLY | 79 | -0.300 | -6.393  | -13.373 | 0.00 | 0.00 | C |
| ATOM | 1226 | C    | GLY | 79 | 1.120  | -5.913  | -13.545 | 0.00 | 0.00 | C |
| ATOM | 1227 | O    | GLY | 79 | 1.975  | -6.255  | -12.748 | 0.00 | 0.00 | O |
| ATOM | 1228 | H    | GLY | 79 | -1.742 | -5.459  | -14.568 | 0.00 | 0.00 | H |
| ATOM | 1229 | HA2  | GLY | 79 | -0.407 | -6.665  | -12.323 | 0.00 | 0.00 | H |
| ATOM | 1230 | HA3  | GLY | 79 | -0.499 | -7.224  | -14.050 | 0.00 | 0.00 | H |
| ATOM | 1231 | N    | GLN | 80 | 1.343  | -5.201  | -14.658 | 0.00 | 0.00 | N |
| ATOM | 1232 | CA   | GLN | 80 | 2.557  | -4.507  | -15.092 | 0.00 | 0.00 | C |
| ATOM | 1233 | C    | GLN | 80 | 2.956  | -3.389  | -14.135 | 0.00 | 0.00 | C |

|      |      |      |     |    |        |         |         |      |      |   |
|------|------|------|-----|----|--------|---------|---------|------|------|---|
| ATOM | 1234 | O    | GLN | 80 | 4.128  | -3.320  | -13.673 | 0.00 | 0.00 | O |
| ATOM | 1235 | CB   | GLN | 80 | 2.271  | -3.923  | -16.463 | 0.00 | 0.00 | C |
| ATOM | 1236 | CG   | GLN | 80 | 3.636  | -3.576  | -17.057 | 0.00 | 0.00 | C |
| ATOM | 1237 | CD   | GLN | 80 | 3.525  | -2.983  | -18.494 | 0.00 | 0.00 | C |
| ATOM | 1238 | NE2  | GLN | 80 | 4.620  | -2.561  | -19.038 | 0.00 | 0.00 | N |
| ATOM | 1239 | OE1  | GLN | 80 | 2.414  | -2.784  | -19.035 | 0.00 | 0.00 | O |
| ATOM | 1240 | H    | GLN | 80 | 0.539  | -5.016  | -15.242 | 0.00 | 0.00 | H |
| ATOM | 1241 | HA   | GLN | 80 | 3.402  | -5.186  | -15.209 | 0.00 | 0.00 | H |
| ATOM | 1242 | HB2  | GLN | 80 | 1.840  | -4.646  | -17.154 | 0.00 | 0.00 | H |
| ATOM | 1243 | HB3  | GLN | 80 | 1.580  | -3.079  | -16.481 | 0.00 | 0.00 | H |
| ATOM | 1244 | HG2  | GLN | 80 | 4.020  | -2.760  | -16.446 | 0.00 | 0.00 | H |
| ATOM | 1245 | HG3  | GLN | 80 | 4.298  | -4.435  | -17.172 | 0.00 | 0.00 | H |
| ATOM | 1246 | 1HE2 | GLN | 80 | 4.557  | -2.079  | -19.924 | 0.00 | 0.00 | H |
| ATOM | 1247 | 2HE2 | GLN | 80 | 5.422  | -2.851  | -18.498 | 0.00 | 0.00 | H |
| ATOM | 1248 | N    | VAL | 81 | 2.003  | -2.565  | -13.684 | 0.00 | 0.00 | N |
| ATOM | 1249 | CA   | VAL | 81 | 2.370  | -1.603  | -12.633 | 0.00 | 0.00 | C |
| ATOM | 1250 | C    | VAL | 81 | 2.595  | -2.307  | -11.251 | 0.00 | 0.00 | C |
| ATOM | 1251 | O    | VAL | 81 | 3.459  | -1.815  | -10.564 | 0.00 | 0.00 | O |
| ATOM | 1252 | CB   | VAL | 81 | 1.242  | -0.534  | -12.487 | 0.00 | 0.00 | C |
| ATOM | 1253 | CG1  | VAL | 81 | 1.509  | 0.434   | -11.302 | 0.00 | 0.00 | C |
| ATOM | 1254 | CG2  | VAL | 81 | 1.320  | 0.532   | -13.653 | 0.00 | 0.00 | C |
| ATOM | 1255 | H    | VAL | 81 | 1.084  | -2.745  | -14.062 | 0.00 | 0.00 | H |
| ATOM | 1256 | HA   | VAL | 81 | 3.280  | -1.080  | -12.926 | 0.00 | 0.00 | H |
| ATOM | 1257 | HB   | VAL | 81 | 0.250  | -0.966  | -12.344 | 0.00 | 0.00 | H |
| ATOM | 1258 | 1HG1 | VAL | 81 | 1.375  | -0.105  | -10.363 | 0.00 | 0.00 | H |
| ATOM | 1259 | 2HG1 | VAL | 81 | 2.533  | 0.812   | -11.314 | 0.00 | 0.00 | H |
| ATOM | 1260 | 3HG1 | VAL | 81 | 0.692  | 1.153   | -11.368 | 0.00 | 0.00 | H |
| ATOM | 1261 | 1HG2 | VAL | 81 | 0.359  | 1.023   | -13.808 | 0.00 | 0.00 | H |
| ATOM | 1262 | 2HG2 | VAL | 81 | 2.052  | 1.323   | -13.489 | 0.00 | 0.00 | H |
| ATOM | 1263 | 3HG2 | VAL | 81 | 1.436  | -0.026  | -14.582 | 0.00 | 0.00 | H |
| ATOM | 1264 | N    | GLY | 82 | 2.012  | -3.497  | -10.931 | 0.00 | 0.00 | N |
| ATOM | 1265 | CA   | GLY | 82 | 2.458  | -4.161  | -9.741  | 0.00 | 0.00 | C |
| ATOM | 1266 | C    | GLY | 82 | 3.856  | -4.659  | -9.883  | 0.00 | 0.00 | C |
| ATOM | 1267 | O    | GLY | 82 | 4.678  | -4.547  | -8.994  | 0.00 | 0.00 | O |
| ATOM | 1268 | H    | GLY | 82 | 1.203  | -3.824  | -11.439 | 0.00 | 0.00 | H |
| ATOM | 1269 | HA2  | GLY | 82 | 2.251  | -3.606  | -8.826  | 0.00 | 0.00 | H |
| ATOM | 1270 | HA3  | GLY | 82 | 1.863  | -5.069  | -9.641  | 0.00 | 0.00 | H |
| ATOM | 1271 | N    | ARG | 83 | 4.211  | -5.215  | -11.058 | 0.00 | 0.00 | N |
| ATOM | 1272 | CA   | ARG | 83 | 5.597  | -5.609  | -11.392 | 0.00 | 0.00 | C |
| ATOM | 1273 | C    | ARG | 83 | 6.659  | -4.511  | -11.291 | 0.00 | 0.00 | C |
| ATOM | 1274 | O    | ARG | 83 | 7.839  | -4.721  | -10.985 | 0.00 | 0.00 | O |
| ATOM | 1275 | CB   | ARG | 83 | 5.740  | -6.218  | -12.824 | 0.00 | 0.00 | C |
| ATOM | 1276 | CG   | ARG | 83 | 5.039  | -7.646  | -12.881 | 0.00 | 0.00 | C |
| ATOM | 1277 | CD   | ARG | 83 | 5.000  | -8.033  | -14.399 | 0.00 | 0.00 | C |
| ATOM | 1278 | NE   | ARG | 83 | 3.876  | -8.969  | -14.707 | 0.00 | 0.00 | N |
| ATOM | 1279 | CZ   | ARG | 83 | 4.007  | -10.247 | -15.053 | 0.00 | 0.00 | C |
| ATOM | 1280 | NH1  | ARG | 83 | 2.969  | -10.861 | -15.452 | 0.00 | 0.00 | N |
| ATOM | 1281 | NH2  | ARG | 83 | 5.170  | -10.799 | -14.900 | 0.00 | 0.00 | N |
| ATOM | 1282 | H    | ARG | 83 | 3.543  | -5.168  | -11.814 | 0.00 | 0.00 | H |
| ATOM | 1283 | HA   | ARG | 83 | 5.808  | -6.391  | -10.661 | 0.00 | 0.00 | H |
| ATOM | 1284 | HB2  | ARG | 83 | 5.130  | -5.636  | -13.515 | 0.00 | 0.00 | H |
| ATOM | 1285 | HB3  | ARG | 83 | 6.810  | -6.301  | -13.011 | 0.00 | 0.00 | H |
| ATOM | 1286 | HG2  | ARG | 83 | 5.571  | -8.418  | -12.326 | 0.00 | 0.00 | H |
| ATOM | 1287 | HG3  | ARG | 83 | 3.978  | -7.568  | -12.648 | 0.00 | 0.00 | H |
| ATOM | 1288 | H02  | ARG | 83 | 4.731  | -7.206  | -15.055 | 0.00 | 0.00 | H |
| ATOM | 1289 | H03  | ARG | 83 | 5.976  | -8.450  | -14.649 | 0.00 | 0.00 | H |
| ATOM | 1290 | HE   | ARG | 83 | 3.084  | -8.502  | -15.127 | 0.00 | 0.00 | H |
| ATOM | 1291 | 1HH1 | ARG | 83 | 2.088  | -10.393 | -15.614 | 0.00 | 0.00 | H |
| ATOM | 1292 | 2HH1 | ARG | 83 | 3.105  | -11.807 | -15.778 | 0.00 | 0.00 | H |
| ATOM | 1293 | 1HH2 | ARG | 83 | 5.892  | -10.175 | -14.572 | 0.00 | 0.00 | H |
| ATOM | 1294 | 2HH2 | ARG | 83 | 5.312  | -11.752 | -15.205 | 0.00 | 0.00 | H |
| ATOM | 1295 | N    | GLN | 84 | 6.227  | -3.214  | -11.495 | 0.00 | 0.00 | N |
| ATOM | 1296 | CA   | GLN | 84 | 6.986  | -1.945  | -11.367 | 0.00 | 0.00 | C |
| ATOM | 1297 | C    | GLN | 84 | 7.157  | -1.340  | -9.946  | 0.00 | 0.00 | C |
| ATOM | 1298 | O    | GLN | 84 | 8.275  | -0.923  | -9.617  | 0.00 | 0.00 | O |
| ATOM | 1299 | CB   | GLN | 84 | 6.393  | -0.964  | -12.374 | 0.00 | 0.00 | C |
| ATOM | 1300 | CG   | GLN | 84 | 7.371  | 0.188   | -12.650 | 0.00 | 0.00 | C |
| ATOM | 1301 | CD   | GLN | 84 | 8.743  | -0.254  | -13.211 | 0.00 | 0.00 | C |
| ATOM | 1302 | NE2  | GLN | 84 | 9.681  | 0.658   | -13.336 | 0.00 | 0.00 | N |
| ATOM | 1303 | OE1  | GLN | 84 | 8.949  | -1.375  | -13.601 | 0.00 | 0.00 | O |
| ATOM | 1304 | H    | GLN | 84 | 5.329  | -3.150  | -11.954 | 0.00 | 0.00 | H |
| ATOM | 1305 | HA   | GLN | 84 | 8.001  | -2.193  | -11.675 | 0.00 | 0.00 | H |
| ATOM | 1306 | HB2  | GLN | 84 | 6.212  | -1.355  | -13.377 | 0.00 | 0.00 | H |
| ATOM | 1307 | HB3  | GLN | 84 | 5.511  | -0.452  | -11.989 | 0.00 | 0.00 | H |
| ATOM | 1308 | HG2  | GLN | 84 | 7.023  | 0.934   | -13.364 | 0.00 | 0.00 | H |
| ATOM | 1309 | HG3  | GLN | 84 | 7.520  | 0.757   | -11.733 | 0.00 | 0.00 | H |
| ATOM | 1310 | 1HE2 | GLN | 84 | 10.528 | 0.378   | -13.809 | 0.00 | 0.00 | H |
| ATOM | 1311 | 2HE2 | GLN | 84 | 9.570  | 1.619   | -13.043 | 0.00 | 0.00 | H |
| ATOM | 1312 | N    | LEU | 85 | 6.087  | -1.419  | -9.166  | 0.00 | 0.00 | N |
| ATOM | 1313 | CA   | LEU | 85 | 6.136  | -1.011  | -7.752  | 0.00 | 0.00 | C |
| ATOM | 1314 | C    | LEU | 85 | 6.860  | -2.013  | -6.830  | 0.00 | 0.00 | C |
| ATOM | 1315 | O    | LEU | 85 | 7.362  | -1.638  | -5.742  | 0.00 | 0.00 | O |
| ATOM | 1316 | CB   | LEU | 85 | 4.794  | -0.696  | -7.128  | 0.00 | 0.00 | C |
| ATOM | 1317 | CG   | LEU | 85 | 4.136  | 0.532   | -7.753  | 0.00 | 0.00 | C |
| ATOM | 1318 | CD1  | LEU | 85 | 2.736  | 0.669   | -7.012  | 0.00 | 0.00 | C |
| ATOM | 1319 | CD2  | LEU | 85 | 4.924  | 1.873   | -7.672  | 0.00 | 0.00 | C |
| ATOM | 1320 | H    | LEU | 85 | 5.216  | -1.620  | -9.634  | 0.00 | 0.00 | H |
| ATOM | 1321 | HA   | LEU | 85 | 6.804  | -0.150  | -7.708  | 0.00 | 0.00 | H |
| ATOM | 1322 | HB2  | LEU | 85 | 4.106  | -1.539  | -7.183  | 0.00 | 0.00 | H |
| ATOM | 1323 | HB3  | LEU | 85 | 4.984  | -0.517  | -6.070  | 0.00 | 0.00 | H |
| ATOM | 1324 | HG   | LEU | 85 | 3.865  | 0.357   | -8.793  | 0.00 | 0.00 | H |
| ATOM | 1325 | 1HD1 | LEU | 85 | 2.172  | 1.452   | -7.520  | 0.00 | 0.00 | H |
| ATOM | 1326 | 2HD1 | LEU | 85 | 2.190  | -0.274  | -6.985  | 0.00 | 0.00 | H |
| ATOM | 1327 | 3HD1 | LEU | 85 | 2.880  | 0.956   | -5.971  | 0.00 | 0.00 | H |
| ATOM | 1328 | 1HD2 | LEU | 85 | 5.351  | 1.877   | -6.668  | 0.00 | 0.00 | H |
| ATOM | 1329 | 2HD2 | LEU | 85 | 5.764  | 1.830   | -8.366  | 0.00 | 0.00 | H |
| ATOM | 1330 | 3HD2 | LEU | 85 | 4.303  | 2.662   | -8.095  | 0.00 | 0.00 | H |
| ATOM | 1331 | N    | ALA | 86 | 6.907  | -3.287  | -7.204  | 0.00 | 0.00 | N |
| ATOM | 1332 | CA   | ALA | 86 | 7.738  | -4.272  | -6.589  | 0.00 | 0.00 | C |
| ATOM | 1333 | C    | ALA | 86 | 9.185  | -4.442  | -7.144  | 0.00 | 0.00 | C |
| ATOM | 1334 | O    | ALA | 86 | 9.996  | -4.867  | -6.317  | 0.00 | 0.00 | O |
| ATOM | 1335 | CB   | ALA | 86 | 7.074  | -5.634  | -6.593  | 0.00 | 0.00 | C |
| ATOM | 1336 | H    | ALA | 86 | 6.307  | -3.647  | -7.934  | 0.00 | 0.00 | H |
| ATOM | 1337 | HA   | ALA | 86 | 7.731  | -3.933  | -5.554  | 0.00 | 0.00 | H |
| ATOM | 1338 | HB1  | ALA | 86 | 6.968  | -5.879  | -7.650  | 0.00 | 0.00 | H |

|      |      |      |     |    |        |        |         |      |      |   |
|------|------|------|-----|----|--------|--------|---------|------|------|---|
| ATOM | 1339 | HB2  | ALA | 86 | 7.797  | -6.332 | -6.171  | 0.00 | 0.00 | H |
| ATOM | 1340 | HB3  | ALA | 86 | 6.102  | -5.619 | -6.100  | 0.00 | 0.00 | H |
| ATOM | 1341 | N    | ILE | 87 | 9.532  | -4.119 | -8.418  | 0.00 | 0.00 | N |
| ATOM | 1342 | CA   | ILE | 87 | 10.937 | -4.167 | -8.866  | 0.00 | 0.00 | C |
| ATOM | 1343 | C    | ILE | 87 | 11.865 | -3.165 | -8.208  | 0.00 | 0.00 | C |
| ATOM | 1344 | O    | ILE | 87 | 13.117 | -3.415 | -8.235  | 0.00 | 0.00 | O |
| ATOM | 1345 | CB   | ILE | 87 | 11.092 | -4.187 | -10.396 | 0.00 | 0.00 | C |
| ATOM | 1346 | CG1  | ILE | 87 | 12.398 | -4.783 | -10.942 | 0.00 | 0.00 | C |
| ATOM | 1347 | CG2  | ILE | 87 | 10.803 | -2.889 | -11.112 | 0.00 | 0.00 | C |
| ATOM | 1348 | CD1  | ILE | 87 | 12.797 | -6.174 | -10.407 | 0.00 | 0.00 | C |
| ATOM | 1349 | H    | ILE | 87 | 8.870  | -3.811 | -9.116  | 0.00 | 0.00 | H |
| ATOM | 1350 | HA   | ILE | 87 | 11.367 | -5.115 | -8.542  | 0.00 | 0.00 | H |
| ATOM | 1351 | HB   | ILE | 87 | 10.272 | -4.815 | -10.747 | 0.00 | 0.00 | H |
| ATOM | 1352 | ZHG1 | ILE | 87 | 12.369 | -4.847 | -12.031 | 0.00 | 0.00 | H |
| ATOM | 1353 | ZHG1 | ILE | 87 | 13.216 | -4.102 | -10.712 | 0.00 | 0.00 | H |
| ATOM | 1354 | 1HG2 | ILE | 87 | 10.001 | -2.310 | -10.655 | 0.00 | 0.00 | H |
| ATOM | 1355 | 2HG2 | ILE | 87 | 11.694 | -2.260 | -11.080 | 0.00 | 0.00 | H |
| ATOM | 1356 | 3HG2 | ILE | 87 | 10.639 | -3.019 | -12.180 | 0.00 | 0.00 | H |
| ATOM | 1357 | 1HD1 | ILE | 87 | 13.620 | -6.551 | -11.011 | 0.00 | 0.00 | H |
| ATOM | 1358 | 2HD1 | ILE | 87 | 13.149 | -6.048 | -9.382  | 0.00 | 0.00 | H |
| ATOM | 1359 | 3HD1 | ILE | 87 | 11.993 | -6.899 | -10.535 | 0.00 | 0.00 | H |
| ATOM | 1360 | N    | ILE | 88 | 11.185 | -2.176 | -7.626  | 0.00 | 0.00 | N |
| ATOM | 1361 | CA   | ILE | 88 | 11.684 | -1.211 | -6.642  | 0.00 | 0.00 | C |
| ATOM | 1362 | C    | ILE | 88 | 11.382 | -1.443 | -5.224  | 0.00 | 0.00 | C |
| ATOM | 1363 | O    | ILE | 88 | 11.888 | -0.762 | -4.359  | 0.00 | 0.00 | O |
| ATOM | 1364 | CB   | ILE | 88 | 11.248 | 0.179  | -7.149  | 0.00 | 0.00 | C |
| ATOM | 1365 | CG1  | ILE | 88 | 9.727  | 0.451  | -6.798  | 0.00 | 0.00 | C |
| ATOM | 1366 | CG2  | ILE | 88 | 11.502 | 0.461  | -8.596  | 0.00 | 0.00 | C |
| ATOM | 1367 | CD1  | ILE | 88 | 9.414  | 1.930  | -6.800  | 0.00 | 0.00 | C |
| ATOM | 1368 | H    | ILE | 88 | 10.203 | -2.005 | -7.798  | 0.00 | 0.00 | H |
| ATOM | 1369 | HA   | ILE | 88 | 12.770 | -1.128 | -6.683  | 0.00 | 0.00 | H |
| ATOM | 1370 | HB   | ILE | 88 | 11.933 | 0.882  | -6.672  | 0.00 | 0.00 | H |
| ATOM | 1371 | ZHG1 | ILE | 88 | 9.090  | -0.087 | -7.499  | 0.00 | 0.00 | H |
| ATOM | 1372 | ZHG1 | ILE | 88 | 9.500  | 0.268  | -5.748  | 0.00 | 0.00 | H |
| ATOM | 1373 | 1HG2 | ILE | 88 | 11.235 | 1.475  | -8.897  | 0.00 | 0.00 | H |
| ATOM | 1374 | 2HG2 | ILE | 88 | 10.978 | -0.197 | -9.290  | 0.00 | 0.00 | H |
| ATOM | 1375 | 3HG2 | ILE | 88 | 12.572 | 0.428  | -8.805  | 0.00 | 0.00 | H |
| ATOM | 1376 | 1HD1 | ILE | 88 | 9.208  | 2.318  | -7.798  | 0.00 | 0.00 | H |
| ATOM | 1377 | 2HD1 | ILE | 88 | 8.483  | 2.186  | -6.296  | 0.00 | 0.00 | H |
| ATOM | 1378 | 3HD1 | ILE | 88 | 10.286 | 2.502  | -6.480  | 0.00 | 0.00 | H |
| ATOM | 1379 | N    | GLY | 89 | 10.640 | -2.482 | -4.872  | 0.00 | 0.00 | N |
| ATOM | 1380 | CA   | GLY | 89 | 10.256 | -2.694 | -3.522  | 0.00 | 0.00 | C |
| ATOM | 1381 | C    | GLY | 89 | 11.435 | -2.907 | -2.490  | 0.00 | 0.00 | C |
| ATOM | 1382 | O    | GLY | 89 | 11.244 | -2.867 | -1.291  | 0.00 | 0.00 | O |
| ATOM | 1383 | H    | GLY | 89 | 10.457 | -3.186 | -5.572  | 0.00 | 0.00 | H |
| ATOM | 1384 | HA2  | GLY | 89 | 9.510  | -1.965 | -3.204  | 0.00 | 0.00 | H |
| ATOM | 1385 | HA3  | GLY | 89 | 9.731  | -3.647 | -3.451  | 0.00 | 0.00 | H |
| ATOM | 1386 | N    | ASP | 90 | 12.668 | -3.194 | -2.925  | 0.00 | 0.00 | N |
| ATOM | 1387 | CA   | ASP | 90 | 13.870 | -3.196 | -2.068  | 0.00 | 0.00 | C |
| ATOM | 1388 | C    | ASP | 90 | 14.210 | -1.765 | -1.622  | 0.00 | 0.00 | C |
| ATOM | 1389 | O    | ASP | 90 | 14.598 | -1.465 | -0.453  | 0.00 | 0.00 | O |
| ATOM | 1390 | CB   | ASP | 90 | 15.096 | -3.708 | -2.854  | 0.00 | 0.00 | C |
| ATOM | 1391 | CG   | ASP | 90 | 16.298 | -3.829 | -2.026  | 0.00 | 0.00 | C |
| ATOM | 1392 | OD1  | ASP | 90 | 17.288 | -3.064 | -2.229  | 0.00 | 0.00 | O |
| ATOM | 1393 | OD2  | ASP | 90 | 16.312 | -4.648 | -1.051  | 0.00 | 0.00 | O |
| ATOM | 1394 | H    | ASP | 90 | 12.824 | -3.402 | -3.901  | 0.00 | 0.00 | H |
| ATOM | 1395 | HA   | ASP | 90 | 13.748 | -3.753 | -1.138  | 0.00 | 0.00 | H |
| ATOM | 1396 | HB2  | ASP | 90 | 14.967 | -4.721 | -3.237  | 0.00 | 0.00 | H |
| ATOM | 1397 | HB3  | ASP | 90 | 15.258 | -3.087 | -3.736  | 0.00 | 0.00 | H |
| ATOM | 1398 | N    | ASP | 91 | 14.114 | -0.726 | -2.478  | 0.00 | 0.00 | N |
| ATOM | 1399 | CA   | ASP | 91 | 14.572 | 0.662  | -2.128  | 0.00 | 0.00 | C |
| ATOM | 1400 | C    | ASP | 91 | 13.708 | 1.368  | -1.001  | 0.00 | 0.00 | C |
| ATOM | 1401 | O    | ASP | 91 | 14.223 | 1.913  | -0.028  | 0.00 | 0.00 | O |
| ATOM | 1402 | CB   | ASP | 91 | 14.650 | 1.493  | -3.416  | 0.00 | 0.00 | C |
| ATOM | 1403 | CG   | ASP | 91 | 15.289 | 2.883  | -3.169  | 0.00 | 0.00 | C |
| ATOM | 1404 | OD1  | ASP | 91 | 16.424 | 3.119  | -3.645  | 0.00 | 0.00 | O |
| ATOM | 1405 | OD2  | ASP | 91 | 14.636 | 3.812  | -2.681  | 0.00 | 0.00 | O |
| ATOM | 1406 | H    | ASP | 91 | 13.475 | -0.783 | -3.256  | 0.00 | 0.00 | H |
| ATOM | 1407 | HA   | ASP | 91 | 15.560 | 0.537  | -1.685  | 0.00 | 0.00 | H |
| ATOM | 1408 | HB2  | ASP | 91 | 15.215 | 0.913  | -4.144  | 0.00 | 0.00 | H |
| ATOM | 1409 | HB3  | ASP | 91 | 13.640 | 1.591  | -3.814  | 0.00 | 0.00 | H |
| ATOM | 1410 | N    | ILE | 92 | 12.418 | 1.058  | -0.921  | 0.00 | 0.00 | N |
| ATOM | 1411 | CA   | ILE | 92 | 11.495 | 1.474  | 0.096   | 0.00 | 0.00 | C |
| ATOM | 1412 | C    | ILE | 92 | 11.432 | 0.625  | 1.336   | 0.00 | 0.00 | C |
| ATOM | 1413 | O    | ILE | 92 | 10.641 | 0.779  | 2.246   | 0.00 | 0.00 | O |
| ATOM | 1414 | CB   | ILE | 92 | 10.126 | 1.612  | -0.665  | 0.00 | 0.00 | C |
| ATOM | 1415 | CG1  | ILE | 92 | 9.732  | 0.198  | -1.175  | 0.00 | 0.00 | C |
| ATOM | 1416 | CG2  | ILE | 92 | 10.178 | 2.763  | -1.728  | 0.00 | 0.00 | C |
| ATOM | 1417 | CD1  | ILE | 92 | 8.202  | 0.194  | -1.592  | 0.00 | 0.00 | C |
| ATOM | 1418 | H    | ILE | 92 | 12.008 | 0.546  | -1.688  | 0.00 | 0.00 | H |
| ATOM | 1419 | HA   | ILE | 92 | 11.817 | 2.438  | 0.487   | 0.00 | 0.00 | H |
| ATOM | 1420 | HB   | ILE | 92 | 9.394  | 1.796  | 0.122   | 0.00 | 0.00 | H |
| ATOM | 1421 | ZHG1 | ILE | 92 | 10.415 | -0.048 | -1.987  | 0.00 | 0.00 | H |
| ATOM | 1422 | ZHG1 | ILE | 92 | 9.950  | -0.531 | -0.396  | 0.00 | 0.00 | H |
| ATOM | 1423 | 1HG2 | ILE | 92 | 9.243  | 2.888  | -2.274  | 0.00 | 0.00 | H |
| ATOM | 1424 | 2HG2 | ILE | 92 | 10.402 | 3.718  | -1.253  | 0.00 | 0.00 | H |
| ATOM | 1425 | 3HG2 | ILE | 92 | 10.948 | 2.515  | -2.459  | 0.00 | 0.00 | H |
| ATOM | 1426 | 1HD1 | ILE | 92 | 7.929  | 1.071  | -2.179  | 0.00 | 0.00 | H |
| ATOM | 1427 | 2HD1 | ILE | 92 | 7.958  | -0.775 | -2.030  | 0.00 | 0.00 | H |
| ATOM | 1428 | 3HD1 | ILE | 92 | 7.587  | 0.281  | -0.696  | 0.00 | 0.00 | H |
| ATOM | 1429 | N    | ASN | 93 | 12.290 | -0.375 | 1.274   | 0.00 | 0.00 | N |
| ATOM | 1430 | CA   | ASN | 93 | 12.419 | -1.402 | 2.320   | 0.00 | 0.00 | C |
| ATOM | 1431 | C    | ASN | 93 | 13.663 | -1.250 | 3.097   | 0.00 | 0.00 | C |
| ATOM | 1432 | O    | ASN | 93 | 13.616 | -1.218 | 4.327   | 0.00 | 0.00 | O |
| ATOM | 1433 | CB   | ASN | 93 | 12.168 | -2.775 | 1.710   | 0.00 | 0.00 | C |
| ATOM | 1434 | CG   | ASN | 93 | 11.833 | -3.821 | 2.724   | 0.00 | 0.00 | C |
| ATOM | 1435 | ND2  | ASN | 93 | 12.762 | -4.683 | 3.019   | 0.00 | 0.00 | N |
| ATOM | 1436 | OD1  | ASN | 93 | 10.682 | -3.925 | 3.217   | 0.00 | 0.00 | O |
| ATOM | 1437 | H    | ASN | 93 | 12.891 | -0.421 | 0.464   | 0.00 | 0.00 | H |
| ATOM | 1438 | HA   | ASN | 93 | 11.584 | -1.266 | 3.009   | 0.00 | 0.00 | H |
| ATOM | 1439 | HB2  | ASN | 93 | 11.308 | -2.694 | 1.046   | 0.00 | 0.00 | H |
| ATOM | 1440 | HB3  | ASN | 93 | 13.006 | -3.079 | 1.081   | 0.00 | 0.00 | H |
| ATOM | 1441 | 1HD2 | ASN | 93 | 12.497 | -5.357 | 3.723   | 0.00 | 0.00 | H |
| ATOM | 1442 | 2HD2 | ASN | 93 | 13.660 | -4.669 | 2.558   | 0.00 | 0.00 | H |
| ATOM | 1443 | N    | ARG | 94 | 14.794 | -0.989 | 2.443   | 0.00 | 0.00 | N |



|      |      |      |     |    |        |        |        |      |      |   |
|------|------|------|-----|----|--------|--------|--------|------|------|---|
| ATOM | 1444 | CA   | ARG | 94 | 16.084 | -0.933 | 3.209  | 0.00 | 0.00 | C |
| ATOM | 1445 | C    | ARG | 94 | 16.306 | 0.325  | 3.984  | 0.00 | 0.00 | C |
| ATOM | 1446 | O    | ARG | 94 | 15.917 | 1.351  | 3.440  | 0.00 | 0.00 | O |
| ATOM | 1447 | CB   | ARG | 94 | 17.251 | -1.481 | 2.303  | 0.00 | 0.00 | C |
| ATOM | 1448 | CG   | ARG | 94 | 17.633 | -0.453 | 1.248  | 0.00 | 0.00 | C |
| ATOM | 1449 | CD   | ARG | 94 | 18.927 | -0.791 | 0.534  | 0.00 | 0.00 | C |
| ATOM | 1450 | NE   | ARG | 94 | 18.917 | -2.124 | -0.075 | 0.00 | 0.00 | N |
| ATOM | 1451 | CZ   | ARG | 94 | 19.461 | -3.322 | 0.288  | 0.00 | 0.00 | C |
| ATOM | 1452 | NH1  | ARG | 94 | 20.357 | -3.255 | 1.178  | 0.00 | 0.00 | N |
| ATOM | 1453 | NH2  | ARG | 94 | 18.937 | -4.465 | -0.025 | 0.00 | 0.00 | N |
| ATOM | 1454 | H    | ARG | 94 | 14.779 | -1.123 | 1.442  | 0.00 | 0.00 | H |
| ATOM | 1455 | HA   | ARG | 94 | 15.968 | -1.652 | 4.022  | 0.00 | 0.00 | H |
| ATOM | 1456 | HB2  | ARG | 94 | 18.136 | -1.665 | 2.912  | 0.00 | 0.00 | H |
| ATOM | 1457 | HB3  | ARG | 94 | 16.965 | -2.448 | 1.888  | 0.00 | 0.00 | H |
| ATOM | 1458 | HG2  | ARG | 94 | 16.791 | -0.393 | 0.560  | 0.00 | 0.00 | H |
| ATOM | 1459 | HG3  | ARG | 94 | 17.722 | 0.470  | 1.821  | 0.00 | 0.00 | H |
| ATOM | 1460 | HD2  | ARG | 94 | 19.240 | -0.024 | -0.173 | 0.00 | 0.00 | H |
| ATOM | 1461 | HD3  | ARG | 94 | 19.590 | -0.761 | 1.398  | 0.00 | 0.00 | H |
| ATOM | 1462 | HE   | ARG | 94 | 18.210 | -2.174 | -0.795 | 0.00 | 0.00 | H |
| ATOM | 1463 | 1HH1 | ARG | 94 | 20.520 | -2.350 | 1.596  | 0.00 | 0.00 | H |
| ATOM | 1464 | 2HH1 | ARG | 94 | 20.651 | -4.146 | 1.550  | 0.00 | 0.00 | H |
| ATOM | 1465 | 1HH2 | ARG | 94 | 18.163 | -4.552 | -0.670 | 0.00 | 0.00 | H |
| ATOM | 1466 | 2HH2 | ARG | 94 | 19.241 | -5.306 | 0.444  | 0.00 | 0.00 | H |
| ATOM | 1467 | N    | ARG | 95 | 16.727 | 0.278  | 5.226  | 0.00 | 0.00 | N |
| ATOM | 1468 | CA   | ARG | 95 | 16.653 | 1.287  | 6.267  | 0.00 | 0.00 | C |
| ATOM | 1469 | C    | ARG | 95 | 15.293 | 1.970  | 6.488  | 0.00 | 0.00 | C |
| ATOM | 1470 | O    | ARG | 95 | 15.294 | 3.140  | 6.900  | 0.00 | 0.00 | O |
| ATOM | 1471 | CB   | ARG | 95 | 17.861 | 2.280  | 6.137  | 0.00 | 0.00 | C |
| ATOM | 1472 | CG   | ARG | 95 | 18.303 | 2.970  | 4.836  | 0.00 | 0.00 | C |
| ATOM | 1473 | CD   | ARG | 95 | 17.295 | 3.918  | 4.187  | 0.00 | 0.00 | C |
| ATOM | 1474 | NE   | ARG | 95 | 16.867 | 4.932  | 5.194  | 0.00 | 0.00 | N |
| ATOM | 1475 | CZ   | ARG | 95 | 17.541 | 6.038  | 5.546  | 0.00 | 0.00 | C |
| ATOM | 1476 | NH1  | ARG | 95 | 18.576 | 6.484  | 4.853  | 0.00 | 0.00 | N |
| ATOM | 1477 | NH2  | ARG | 95 | 17.067 | 6.655  | 6.618  | 0.00 | 0.00 | N |
| ATOM | 1478 | H    | ARG | 95 | 17.157 | -0.578 | 5.544  | 0.00 | 0.00 | H |
| ATOM | 1479 | HA   | ARG | 95 | 16.869 | 0.695  | 7.157  | 0.00 | 0.00 | H |
| ATOM | 1480 | HB2  | ARG | 95 | 17.885 | 2.972  | 6.979  | 0.00 | 0.00 | H |
| ATOM | 1481 | HB3  | ARG | 95 | 18.691 | 1.608  | 6.356  | 0.00 | 0.00 | H |
| ATOM | 1482 | HG2  | ARG | 95 | 19.252 | 3.499  | 4.938  | 0.00 | 0.00 | H |
| ATOM | 1483 | HG3  | ARG | 95 | 18.550 | 2.220  | 4.085  | 0.00 | 0.00 | H |
| ATOM | 1484 | HD2  | ARG | 95 | 17.778 | 4.303  | 3.289  | 0.00 | 0.00 | H |
| ATOM | 1485 | HD3  | ARG | 95 | 16.346 | 3.420  | 3.987  | 0.00 | 0.00 | H |
| ATOM | 1486 | HE   | ARG | 95 | 16.103 | 4.719  | 5.819  | 0.00 | 0.00 | H |
| ATOM | 1487 | 1HH1 | ARG | 95 | 18.982 | 5.862  | 4.167  | 0.00 | 0.00 | H |
| ATOM | 1488 | 2HH1 | ARG | 95 | 18.934 | 7.396  | 5.093  | 0.00 | 0.00 | H |
| ATOM | 1489 | 1HH2 | ARG | 95 | 16.209 | 6.317  | 7.030  | 0.00 | 0.00 | H |
| ATOM | 1490 | 2HH2 | ARG | 95 | 17.210 | 7.655  | 6.653  | 0.00 | 0.00 | H |
| ATOM | 1491 | N    | TYR | 96 | 14.151 | 1.204  | 6.227  | 0.00 | 0.00 | N |
| ATOM | 1492 | CA   | TYR | 96 | 12.832 | 1.800  | 6.543  | 0.00 | 0.00 | C |
| ATOM | 1493 | C    | TYR | 96 | 11.734 | 0.821  | 7.063  | 0.00 | 0.00 | C |
| ATOM | 1494 | O    | TYR | 96 | 10.811 | 1.254  | 7.781  | 0.00 | 0.00 | O |
| ATOM | 1495 | CB   | TYR | 96 | 12.417 | 2.470  | 5.185  | 0.00 | 0.00 | C |
| ATOM | 1496 | CG   | TYR | 96 | 13.020 | 3.852  | 4.661  | 0.00 | 0.00 | C |
| ATOM | 1497 | CD1  | TYR | 96 | 12.777 | 5.092  | 5.349  | 0.00 | 0.00 | C |
| ATOM | 1498 | CD2  | TYR | 96 | 13.602 | 3.917  | 3.353  | 0.00 | 0.00 | C |
| ATOM | 1499 | CE1  | TYR | 96 | 13.342 | 6.308  | 4.887  | 0.00 | 0.00 | C |
| ATOM | 1500 | CE2  | TYR | 96 | 14.328 | 5.090  | 2.951  | 0.00 | 0.00 | C |
| ATOM | 1501 | CZ   | TYR | 96 | 14.181 | 6.216  | 3.778  | 0.00 | 0.00 | C |
| ATOM | 1502 | OH   | TYR | 96 | 14.902 | 7.349  | 3.428  | 0.00 | 0.00 | O |
| ATOM | 1503 | H    | TYR | 96 | 14.268 | 0.285  | 5.827  | 0.00 | 0.00 | H |
| ATOM | 1504 | HA   | TYR | 96 | 13.064 | 2.518  | 7.329  | 0.00 | 0.00 | H |
| ATOM | 1505 | HB2  | TYR | 96 | 12.472 | 1.722  | 4.394  | 0.00 | 0.00 | H |
| ATOM | 1506 | HB3  | TYR | 96 | 11.371 | 2.738  | 5.331  | 0.00 | 0.00 | H |
| ATOM | 1507 | HD1  | TYR | 96 | 12.382 | 5.094  | 6.355  | 0.00 | 0.00 | H |
| ATOM | 1508 | HD2  | TYR | 96 | 13.835 | 3.055  | 2.748  | 0.00 | 0.00 | H |
| ATOM | 1509 | HE1  | TYR | 96 | 13.242 | 7.259  | 5.389  | 0.00 | 0.00 | H |
| ATOM | 1510 | HE2  | TYR | 96 | 14.963 | 5.035  | 2.078  | 0.00 | 0.00 | H |
| ATOM | 1511 | HH   | TYR | 96 | 15.578 | 7.221  | 2.759  | 0.00 | 0.00 | H |
| ATOM | 1512 | N    | ASP | 97 | 11.964 | -0.464 | 6.901  | 0.00 | 0.00 | N |
| ATOM | 1513 | CA   | ASP | 97 | 11.041 | -1.567 | 7.343  | 0.00 | 0.00 | C |
| ATOM | 1514 | C    | ASP | 97 | 10.929 | -1.715 | 8.814  | 0.00 | 0.00 | C |
| ATOM | 1515 | O    | ASP | 97 | 9.857  | -2.001 | 9.348  | 0.00 | 0.00 | O |
| ATOM | 1516 | CB   | ASP | 97 | 11.619 | -2.957 | 6.844  | 0.00 | 0.00 | C |
| ATOM | 1517 | CG   | ASP | 97 | 10.665 | -4.111 | 7.036  | 0.00 | 0.00 | C |
| ATOM | 1518 | OD1  | ASP | 97 | 9.493  | -4.031 | 6.660  | 0.00 | 0.00 | O |
| ATOM | 1519 | OD2  | ASP | 97 | 11.136 | -5.225 | 7.357  | 0.00 | 0.00 | O |
| ATOM | 1520 | H    | ASP | 97 | 12.778 | -0.811 | 6.416  | 0.00 | 0.00 | H |
| ATOM | 1521 | HA   | ASP | 97 | 10.036 | -1.452 | 6.937  | 0.00 | 0.00 | H |
| ATOM | 1522 | HB2  | ASP | 97 | 11.809 | -2.814 | 5.780  | 0.00 | 0.00 | H |
| ATOM | 1523 | HB3  | ASP | 97 | 12.602 | -3.146 | 7.276  | 0.00 | 0.00 | H |
| ATOM | 1524 | N    | SER | 98 | 12.084 | -1.444 | 9.481  | 0.00 | 0.00 | N |
| ATOM | 1525 | CA   | SER | 98 | 12.211 | -1.536 | 10.899 | 0.00 | 0.00 | C |
| ATOM | 1526 | C    | SER | 98 | 11.470 | -0.363 | 11.581 | 0.00 | 0.00 | C |
| ATOM | 1527 | O    | SER | 98 | 10.926 | -0.535 | 12.699 | 0.00 | 0.00 | O |
| ATOM | 1528 | CB   | SER | 98 | 13.688 | -1.352 | 11.170 | 0.00 | 0.00 | C |
| ATOM | 1529 | OG   | SER | 98 | 14.235 | -0.098 | 10.943 | 0.00 | 0.00 | O |
| ATOM | 1530 | H    | SER | 98 | 12.955 | -1.267 | 9.002  | 0.00 | 0.00 | H |
| ATOM | 1531 | HA   | SER | 98 | 11.939 | -2.483 | 11.365 | 0.00 | 0.00 | H |
| ATOM | 1532 | HB2  | SER | 98 | 14.034 | -1.735 | 12.130 | 0.00 | 0.00 | H |
| ATOM | 1533 | HB3  | SER | 98 | 14.276 | -2.026 | 10.549 | 0.00 | 0.00 | H |
| ATOM | 1534 | HG   | SER | 98 | 15.177 | -0.272 | 10.865 | 0.00 | 0.00 | H |
| ATOM | 1535 | N    | GLU | 99 | 11.260 | 0.774  | 10.862 | 0.00 | 0.00 | N |
| ATOM | 1536 | CA   | GLU | 99 | 10.499 | 1.949  | 11.314 | 0.00 | 0.00 | C |
| ATOM | 1537 | C    | GLU | 99 | 8.968  | 1.701  | 11.202 | 0.00 | 0.00 | C |
| ATOM | 1538 | O    | GLU | 99 | 8.255  | 2.304  | 12.012 | 0.00 | 0.00 | O |
| ATOM | 1539 | CB   | GLU | 99 | 10.916 | 3.233  | 10.556 | 0.00 | 0.00 | C |
| ATOM | 1540 | CG   | GLU | 99 | 12.275 | 3.831  | 10.869 | 0.00 | 0.00 | C |
| ATOM | 1541 | CD   | GLU | 99 | 12.415 | 5.300  | 10.425 | 0.00 | 0.00 | C |
| ATOM | 1542 | OE1  | GLU | 99 | 12.645 | 6.182  | 11.300 | 0.00 | 0.00 | O |
| ATOM | 1543 | OE2  | GLU | 99 | 12.400 | 5.614  | 9.243  | 0.00 | 0.00 | O |
| ATOM | 1544 | H    | GLU | 99 | 11.686 | 0.772  | 9.947  | 0.00 | 0.00 | H |
| ATOM | 1545 | HA   | GLU | 99 | 10.601 | 2.115  | 12.386 | 0.00 | 0.00 | H |
| ATOM | 1546 | HB2  | GLU | 99 | 10.696 | 3.169  | 9.491  | 0.00 | 0.00 | H |
| ATOM | 1547 | HB3  | GLU | 99 | 10.249 | 3.995  | 10.960 | 0.00 | 0.00 | H |
| ATOM | 1548 | HG2  | GLU | 99 | 12.348 | 3.780  | 11.956 | 0.00 | 0.00 | H |

|      |      |      |     |     |        |        |        |      |      |   |
|------|------|------|-----|-----|--------|--------|--------|------|------|---|
| ATOM | 1549 | HG3  | GLU | 99  | 13.096 | 3.307  | 10.380 | 0.00 | 0.00 | H |
| ATOM | 1550 | N    | PHE | 100 | 8.569  | 0.802  | 10.243 | 0.00 | 0.00 | N |
| ATOM | 1551 | CA   | PHE | 100 | 7.260  | 0.168  | 10.089 | 0.00 | 0.00 | C |
| ATOM | 1552 | C    | PHE | 100 | 7.011  | -0.838 | 11.234 | 0.00 | 0.00 | C |
| ATOM | 1553 | O    | PHE | 100 | 5.903  | -0.865 | 11.675 | 0.00 | 0.00 | O |
| ATOM | 1554 | CB   | PHE | 100 | 7.072  | -0.325 | 8.674  | 0.00 | 0.00 | C |
| ATOM | 1555 | CG   | PHE | 100 | 6.501  | 0.653  | 7.644  | 0.00 | 0.00 | C |
| ATOM | 1556 | CD1  | PHE | 100 | 6.479  | 0.252  | 6.295  | 0.00 | 0.00 | C |
| ATOM | 1557 | CD2  | PHE | 100 | 5.989  | 1.888  | 8.011  | 0.00 | 0.00 | C |
| ATOM | 1558 | CE1  | PHE | 100 | 5.976  | 1.064  | 5.310  | 0.00 | 0.00 | C |
| ATOM | 1559 | CE2  | PHE | 100 | 5.357  | 2.681  | 7.024  | 0.00 | 0.00 | C |
| ATOM | 1560 | CZ   | PHE | 100 | 5.371  | 2.286  | 5.625  | 0.00 | 0.00 | C |
| ATOM | 1561 | H    | PHE | 100 | 9.189  | 0.452  | 9.527  | 0.00 | 0.00 | H |
| ATOM | 1562 | HA   | PHE | 100 | 6.474  | 0.887  | 10.326 | 0.00 | 0.00 | H |
| ATOM | 1563 | HB2  | PHE | 100 | 7.963  | -0.822 | 8.290  | 0.00 | 0.00 | H |
| ATOM | 1564 | HB3  | PHE | 100 | 6.299  | -1.086 | 8.788  | 0.00 | 0.00 | H |
| ATOM | 1565 | HD1  | PHE | 100 | 6.885  | -0.698 | 5.981  | 0.00 | 0.00 | H |
| ATOM | 1566 | HD2  | PHE | 100 | 6.177  | 2.319  | 8.983  | 0.00 | 0.00 | H |
| ATOM | 1567 | HE1  | PHE | 100 | 6.136  | 0.742  | 4.291  | 0.00 | 0.00 | H |
| ATOM | 1568 | HE2  | PHE | 100 | 5.013  | 3.658  | 7.327  | 0.00 | 0.00 | H |
| ATOM | 1569 | HZ   | PHE | 100 | 5.100  | 2.967  | 4.833  | 0.00 | 0.00 | H |
| ATOM | 1570 | N    | GLN | 101 | 7.977  | -1.715 | 11.647 | 0.00 | 0.00 | N |
| ATOM | 1571 | CA   | GLN | 101 | 7.784  | -2.553 | 12.856 | 0.00 | 0.00 | C |
| ATOM | 1572 | C    | GLN | 101 | 7.543  | -1.691 | 14.104 | 0.00 | 0.00 | C |
| ATOM | 1573 | O    | GLN | 101 | 6.734  | -2.047 | 14.974 | 0.00 | 0.00 | O |
| ATOM | 1574 | CB   | GLN | 101 | 9.094  | -3.415 | 13.048 | 0.00 | 0.00 | C |
| ATOM | 1575 | CG   | GLN | 101 | 9.297  | -4.494 | 11.996 | 0.00 | 0.00 | C |
| ATOM | 1576 | CD   | GLN | 101 | 10.322 | -5.474 | 12.583 | 0.00 | 0.00 | C |
| ATOM | 1577 | NE2  | GLN | 101 | 9.997  | -6.729 | 12.708 | 0.00 | 0.00 | N |
| ATOM | 1578 | OE1  | GLN | 101 | 11.408 | -5.167 | 13.030 | 0.00 | 0.00 | O |
| ATOM | 1579 | H    | GLN | 101 | 8.889  | -1.736 | 11.216 | 0.00 | 0.00 | H |
| ATOM | 1580 | HA   | GLN | 101 | 7.027  | -3.311 | 12.657 | 0.00 | 0.00 | H |
| ATOM | 1581 | HB2  | GLN | 101 | 9.951  | -2.749 | 13.142 | 0.00 | 0.00 | H |
| ATOM | 1582 | HB3  | GLN | 101 | 8.864  | -3.866 | 14.013 | 0.00 | 0.00 | H |
| ATOM | 1583 | HG2  | GLN | 101 | 8.364  | -5.019 | 11.792 | 0.00 | 0.00 | H |
| ATOM | 1584 | HG3  | GLN | 101 | 9.799  | -4.159 | 11.089 | 0.00 | 0.00 | H |
| ATOM | 1585 | 1HE2 | GLN | 101 | 10.815 | -7.293 | 12.891 | 0.00 | 0.00 | H |
| ATOM | 1586 | 2HE2 | GLN | 101 | 9.176  | -7.060 | 12.221 | 0.00 | 0.00 | H |
| ATOM | 1587 | N    | THR | 102 | 8.196  | -0.538 | 14.174 | 0.00 | 0.00 | N |
| ATOM | 1588 | CA   | THR | 102 | 8.041  | 0.362  | 15.319 | 0.00 | 0.00 | C |
| ATOM | 1589 | C    | THR | 102 | 6.593  | 0.951  | 15.194 | 0.00 | 0.00 | C |
| ATOM | 1590 | O    | THR | 102 | 5.827  | 0.847  | 16.155 | 0.00 | 0.00 | O |
| ATOM | 1591 | CB   | THR | 102 | 9.202  | 1.366  | 15.251 | 0.00 | 0.00 | C |
| ATOM | 1592 | CG2  | THR | 102 | 9.239  | 2.332  | 16.424 | 0.00 | 0.00 | C |
| ATOM | 1593 | OG1  | THR | 102 | 10.399 | 0.617  | 15.273 | 0.00 | 0.00 | O |
| ATOM | 1594 | H    | THR | 102 | 8.995  | -0.514 | 13.556 | 0.00 | 0.00 | H |
| ATOM | 1595 | HA   | THR | 102 | 8.120  | -0.198 | 16.252 | 0.00 | 0.00 | H |
| ATOM | 1596 | HB   | THR | 102 | 9.095  | 1.812  | 14.262 | 0.00 | 0.00 | H |
| ATOM | 1597 | HG1  | THR | 102 | 10.496 | 0.270  | 14.383 | 0.00 | 0.00 | H |
| ATOM | 1598 | 1HG2 | THR | 102 | 10.161 | 2.915  | 16.437 | 0.00 | 0.00 | H |
| ATOM | 1599 | 2HG2 | THR | 102 | 8.431  | 3.044  | 16.258 | 0.00 | 0.00 | H |
| ATOM | 1600 | 3HG2 | THR | 102 | 9.110  | 1.827  | 17.381 | 0.00 | 0.00 | H |
| ATOM | 1601 | N    | MET | 103 | 6.173  | 1.391  | 13.981 | 0.00 | 0.00 | N |
| ATOM | 1602 | CA   | MET | 103 | 4.786  | 1.931  | 13.758 | 0.00 | 0.00 | C |
| ATOM | 1603 | C    | MET | 103 | 3.724  | 0.963  | 14.195 | 0.00 | 0.00 | C |
| ATOM | 1604 | O    | MET | 103 | 2.752  | 1.371  | 14.919 | 0.00 | 0.00 | O |
| ATOM | 1605 | CB   | MET | 103 | 4.600  | 2.365  | 12.344 | 0.00 | 0.00 | C |
| ATOM | 1606 | CG   | MET | 103 | 3.648  | 3.526  | 12.048 | 0.00 | 0.00 | C |
| ATOM | 1607 | SD   | MET | 103 | 3.859  | 4.170  | 10.345 | 0.00 | 0.00 | S |
| ATOM | 1608 | CE   | MET | 103 | 2.109  | 4.875  | 10.180 | 0.00 | 0.00 | C |
| ATOM | 1609 | H    | MET | 103 | 6.847  | 1.407  | 13.229 | 0.00 | 0.00 | H |
| ATOM | 1610 | HA   | MET | 103 | 4.690  | 2.869  | 14.307 | 0.00 | 0.00 | H |
| ATOM | 1611 | HB2  | MET | 103 | 5.567  | 2.771  | 12.042 | 0.00 | 0.00 | H |
| ATOM | 1612 | HB3  | MET | 103 | 4.193  | 1.541  | 11.758 | 0.00 | 0.00 | H |
| ATOM | 1613 | HG2  | MET | 103 | 2.617  | 3.245  | 12.260 | 0.00 | 0.00 | H |
| ATOM | 1614 | HG3  | MET | 103 | 3.840  | 4.343  | 12.742 | 0.00 | 0.00 | H |
| ATOM | 1615 | HE1  | MET | 103 | 1.289  | 4.173  | 10.332 | 0.00 | 0.00 | H |
| ATOM | 1616 | HE2  | MET | 103 | 1.941  | 5.675  | 10.899 | 0.00 | 0.00 | H |
| ATOM | 1617 | HE3  | MET | 103 | 2.059  | 5.342  | 9.196  | 0.00 | 0.00 | H |
| ATOM | 1618 | N    | LEU | 104 | 4.017  | -0.302 | 14.033 | 0.00 | 0.00 | N |
| ATOM | 1619 | CA   | LEU | 104 | 3.012  | -1.378 | 14.193 | 0.00 | 0.00 | C |
| ATOM | 1620 | C    | LEU | 104 | 2.803  | -1.987 | 15.661 | 0.00 | 0.00 | C |
| ATOM | 1621 | O    | LEU | 104 | 1.967  | -2.863 | 15.833 | 0.00 | 0.00 | O |
| ATOM | 1622 | CB   | LEU | 104 | 3.458  | -2.513 | 13.214 | 0.00 | 0.00 | C |
| ATOM | 1623 | CG   | LEU | 104 | 2.938  | -2.152 | 11.818 | 0.00 | 0.00 | C |
| ATOM | 1624 | CD1  | LEU | 104 | 3.381  | -3.246 | 10.784 | 0.00 | 0.00 | C |
| ATOM | 1625 | CD2  | LEU | 104 | 1.400  | -1.962 | 11.594 | 0.00 | 0.00 | C |
| ATOM | 1626 | H    | LEU | 104 | 4.861  | -0.596 | 13.565 | 0.00 | 0.00 | H |
| ATOM | 1627 | HA   | LEU | 104 | 2.032  | -0.989 | 13.921 | 0.00 | 0.00 | H |
| ATOM | 1628 | HB2  | LEU | 104 | 4.541  | -2.635 | 13.193 | 0.00 | 0.00 | H |
| ATOM | 1629 | HB3  | LEU | 104 | 3.011  | -3.425 | 13.610 | 0.00 | 0.00 | H |
| ATOM | 1630 | HG   | LEU | 104 | 3.446  | -1.226 | 11.544 | 0.00 | 0.00 | H |
| ATOM | 1631 | 1HD1 | LEU | 104 | 4.251  | -3.788 | 11.152 | 0.00 | 0.00 | H |
| ATOM | 1632 | 2HD1 | LEU | 104 | 2.644  | -4.029 | 10.609 | 0.00 | 0.00 | H |
| ATOM | 1633 | 3HD1 | LEU | 104 | 3.451  | -2.790 | 9.796  | 0.00 | 0.00 | H |
| ATOM | 1634 | 1HD2 | LEU | 104 | 1.052  | -0.993 | 11.953 | 0.00 | 0.00 | H |
| ATOM | 1635 | 2HD2 | LEU | 104 | 1.191  | -1.924 | 10.525 | 0.00 | 0.00 | H |
| ATOM | 1636 | 3HD2 | LEU | 104 | 0.946  | -2.739 | 12.208 | 0.00 | 0.00 | H |
| ATOM | 1637 | N    | GLN | 105 | 3.455  | -1.465 | 16.638 | 0.00 | 0.00 | N |
| ATOM | 1638 | CA   | GLN | 105 | 3.365  | -1.630 | 18.093 | 0.00 | 0.00 | C |
| ATOM | 1639 | C    | GLN | 105 | 2.349  | -0.647 | 18.713 | 0.00 | 0.00 | C |
| ATOM | 1640 | O    | GLN | 105 | 2.149  | -0.651 | 19.927 | 0.00 | 0.00 | O |
| ATOM | 1641 | CB   | GLN | 105 | 4.745  | -1.212 | 18.692 | 0.00 | 0.00 | C |
| ATOM | 1642 | CG   | GLN | 105 | 5.766  | -2.368 | 18.366 | 0.00 | 0.00 | C |
| ATOM | 1643 | CD   | GLN | 105 | 7.205  | -1.864 | 18.628 | 0.00 | 0.00 | C |
| ATOM | 1644 | NE2  | GLN | 105 | 8.201  | -2.263 | 17.920 | 0.00 | 0.00 | N |
| ATOM | 1645 | OE1  | GLN | 105 | 7.396  | -0.936 | 19.414 | 0.00 | 0.00 | O |
| ATOM | 1646 | H    | GLN | 105 | 4.188  | -0.892 | 16.246 | 0.00 | 0.00 | H |
| ATOM | 1647 | HA   | GLN | 105 | 3.131  | -2.658 | 18.372 | 0.00 | 0.00 | H |
| ATOM | 1648 | HB2  | GLN | 105 | 5.093  | -0.268 | 18.271 | 0.00 | 0.00 | H |
| ATOM | 1649 | HB3  | GLN | 105 | 4.592  | -0.996 | 19.750 | 0.00 | 0.00 | H |
| ATOM | 1650 | HG2  | GLN | 105 | 5.397  | -3.218 | 18.941 | 0.00 | 0.00 | H |
| ATOM | 1651 | HG3  | GLN | 105 | 5.689  | -2.666 | 17.321 | 0.00 | 0.00 | H |
| ATOM | 1652 | 1HE2 | GLN | 105 | 9.113  | -1.846 | 18.028 | 0.00 | 0.00 | H |
| ATOM | 1653 | 2HE2 | GLN | 105 | 8.069  | -3.115 | 17.392 | 0.00 | 0.00 | H |

|      |      |      |     |     |         |        |        |      |      |   |
|------|------|------|-----|-----|---------|--------|--------|------|------|---|
| ATOM | 1654 | N    | HIP | 106 | 1.767   | 0.343  | 17.981 | 0.00 | 0.00 | N |
| ATOM | 1655 | CA   | HIP | 106 | 0.873   | 1.404  | 18.518 | 0.00 | 0.00 | C |
| ATOM | 1656 | C    | HIP | 106 | -0.652  | 1.131  | 18.376 | 0.00 | 0.00 | C |
| ATOM | 1657 | O    | HIP | 106 | -1.451  | 2.042  | 18.639 | 0.00 | 0.00 | O |
| ATOM | 1658 | CB   | HIP | 106 | 1.295   | 2.746  | 17.936 | 0.00 | 0.00 | C |
| ATOM | 1659 | CG   | HIP | 106 | 2.731   | 3.055  | 17.822 | 0.00 | 0.00 | C |
| ATOM | 1660 | CD2  | HIP | 106 | 3.363   | 3.467  | 16.684 | 0.00 | 0.00 | C |
| ATOM | 1661 | ND1  | HIP | 106 | 3.646   | 3.156  | 18.880 | 0.00 | 0.00 | N |
| ATOM | 1662 | CE1  | HIP | 106 | 4.850   | 3.542  | 18.363 | 0.00 | 0.00 | C |
| ATOM | 1663 | NE2  | HIP | 106 | 4.697   | 3.755  | 17.042 | 0.00 | 0.00 | N |
| ATOM | 1664 | H    | HIP | 106 | 2.012   | 0.358  | 17.000 | 0.00 | 0.00 | H |
| ATOM | 1665 | HA   | HIP | 106 | 1.020   | 1.432  | 19.598 | 0.00 | 0.00 | H |
| ATOM | 1666 | HB2  | HIP | 106 | 0.788   | 2.893  | 16.982 | 0.00 | 0.00 | H |
| ATOM | 1667 | HB3  | HIP | 106 | 0.789   | 3.482  | 18.559 | 0.00 | 0.00 | H |
| ATOM | 1668 | HD1  | HIP | 106 | 3.543   | 2.874  | 19.844 | 0.00 | 0.00 | H |
| ATOM | 1669 | HD2  | HIP | 106 | 2.871   | 3.728  | 15.760 | 0.00 | 0.00 | H |
| ATOM | 1670 | HE1  | HIP | 106 | 5.780   | 3.605  | 18.909 | 0.00 | 0.00 | H |
| ATOM | 1671 | HE2  | HIP | 106 | 5.441   | 4.032  | 16.417 | 0.00 | 0.00 | H |
| ATOM | 1672 | N    | LEU | 107 | -0.998  | -0.131 | 18.032 | 0.00 | 0.00 | N |
| ATOM | 1673 | CA   | LEU | 107 | -2.347  | -0.693 | 17.837 | 0.00 | 0.00 | C |
| ATOM | 1674 | C    | LEU | 107 | -2.304  | -2.112 | 18.443 | 0.00 | 0.00 | C |
| ATOM | 1675 | O    | LEU | 107 | -1.345  | -2.833 | 18.457 | 0.00 | 0.00 | O |
| ATOM | 1676 | CB   | LEU | 107 | -2.896  | -0.706 | 16.350 | 0.00 | 0.00 | C |
| ATOM | 1677 | CG   | LEU | 107 | -1.950  | -1.415 | 15.269 | 0.00 | 0.00 | C |
| ATOM | 1678 | CD1  | LEU | 107 | -2.767  | -1.746 | 14.026 | 0.00 | 0.00 | C |
| ATOM | 1679 | CD2  | LEU | 107 | -0.722  | -0.619 | 14.890 | 0.00 | 0.00 | C |
| ATOM | 1680 | H    | LEU | 107 | -0.265  | -0.821 | 18.098 | 0.00 | 0.00 | H |
| ATOM | 1681 | HA   | LEU | 107 | -3.057  | -0.165 | 18.472 | 0.00 | 0.00 | H |
| ATOM | 1682 | HB2  | LEU | 107 | -3.886  | -1.164 | 16.335 | 0.00 | 0.00 | H |
| ATOM | 1683 | HB3  | LEU | 107 | -2.964  | 0.346  | 16.070 | 0.00 | 0.00 | H |
| ATOM | 1684 | HG   | LEU | 107 | -1.658  | -2.383 | 15.675 | 0.00 | 0.00 | H |
| ATOM | 1685 | 1HD1 | LEU | 107 | -3.632  | -2.336 | 14.331 | 0.00 | 0.00 | H |
| ATOM | 1686 | 2HD1 | LEU | 107 | -3.053  | -0.838 | 13.494 | 0.00 | 0.00 | H |
| ATOM | 1687 | 3HD1 | LEU | 107 | -2.114  | -2.282 | 13.337 | 0.00 | 0.00 | H |
| ATOM | 1688 | 1HD2 | LEU | 107 | 0.121   | -1.067 | 15.415 | 0.00 | 0.00 | H |
| ATOM | 1689 | 2HD2 | LEU | 107 | -0.473  | -0.759 | 13.837 | 0.00 | 0.00 | H |
| ATOM | 1690 | 3HD2 | LEU | 107 | -0.835  | 0.447  | 15.089 | 0.00 | 0.00 | H |
| ATOM | 1691 | N    | GLN | 108 | -3.461  | -2.595 | 18.802 | 0.00 | 0.00 | N |
| ATOM | 1692 | CA   | GLN | 108 | -3.760  | -3.962 | 19.295 | 0.00 | 0.00 | C |
| ATOM | 1693 | C    | GLN | 108 | -3.643  | -4.966 | 18.147 | 0.00 | 0.00 | C |
| ATOM | 1694 | O    | GLN | 108 | -3.787  | -4.562 | 16.961 | 0.00 | 0.00 | O |
| ATOM | 1695 | CB   | GLN | 108 | -5.165  | -3.918 | 19.816 | 0.00 | 0.00 | C |
| ATOM | 1696 | CG   | GLN | 108 | -5.470  | -2.781 | 20.818 | 0.00 | 0.00 | C |
| ATOM | 1697 | CD   | GLN | 108 | -7.002  | -2.876 | 21.196 | 0.00 | 0.00 | C |
| ATOM | 1698 | NE2  | GLN | 108 | -7.537  | -1.811 | 21.735 | 0.00 | 0.00 | N |
| ATOM | 1699 | OE1  | GLN | 108 | -7.715  | -3.827 | 21.057 | 0.00 | 0.00 | O |
| ATOM | 1700 | H    | GLN | 108 | -4.236  | -1.965 | 18.649 | 0.00 | 0.00 | H |
| ATOM | 1701 | HA   | GLN | 108 | -3.089  | -4.328 | 20.071 | 0.00 | 0.00 | H |
| ATOM | 1702 | HB2  | GLN | 108 | -5.948  | -3.844 | 19.061 | 0.00 | 0.00 | H |
| ATOM | 1703 | HB3  | GLN | 108 | -5.335  | -4.861 | 20.337 | 0.00 | 0.00 | H |
| ATOM | 1704 | HG2  | GLN | 108 | -4.861  | -2.979 | 21.699 | 0.00 | 0.00 | H |
| ATOM | 1705 | HG3  | GLN | 108 | -5.295  | -1.808 | 20.359 | 0.00 | 0.00 | H |
| ATOM | 1706 | 1HE2 | GLN | 108 | -8.506  | -1.878 | 22.012 | 0.00 | 0.00 | H |
| ATOM | 1707 | 2HE2 | GLN | 108 | -7.111  | -0.918 | 21.528 | 0.00 | 0.00 | H |
| ATOM | 1708 | N    | PRO | 109 | -3.520  | -6.301 | 18.406 | 0.00 | 0.00 | N |
| ATOM | 1709 | CA   | PRO | 109 | -3.419  | -7.325 | 17.378 | 0.00 | 0.00 | C |
| ATOM | 1710 | C    | PRO | 109 | -4.735  | -7.797 | 16.735 | 0.00 | 0.00 | C |
| ATOM | 1711 | O    | PRO | 109 | -4.929  | -9.004 | 16.465 | 0.00 | 0.00 | O |
| ATOM | 1712 | CB   | PRO | 109 | -2.511  | -8.444 | 17.995 | 0.00 | 0.00 | C |
| ATOM | 1713 | CG   | PRO | 109 | -2.874  | -8.426 | 19.444 | 0.00 | 0.00 | C |
| ATOM | 1714 | CD   | PRO | 109 | -3.065  | -6.892 | 19.694 | 0.00 | 0.00 | C |
| ATOM | 1715 | HA   | PRO | 109 | -2.852  | -6.983 | 16.513 | 0.00 | 0.00 | H |
| ATOM | 1716 | HB2  | PRO | 109 | -1.445  | -8.234 | 17.920 | 0.00 | 0.00 | H |
| ATOM | 1717 | HB3  | PRO | 109 | -2.701  | -9.409 | 17.527 | 0.00 | 0.00 | H |
| ATOM | 1718 | HG2  | PRO | 109 | -3.853  | -8.859 | 19.646 | 0.00 | 0.00 | H |
| ATOM | 1719 | HG3  | PRO | 109 | -2.071  | -8.900 | 20.011 | 0.00 | 0.00 | H |
| ATOM | 1720 | HD2  | PRO | 109 | -3.778  | -6.849 | 20.518 | 0.00 | 0.00 | H |
| ATOM | 1721 | HD3  | PRO | 109 | -2.201  | -6.339 | 20.062 | 0.00 | 0.00 | H |
| ATOM | 1722 | N    | THR | 110 | -5.636  | -6.842 | 16.426 | 0.00 | 0.00 | N |
| ATOM | 1723 | CA   | THR | 110 | -6.974  | -7.171 | 15.829 | 0.00 | 0.00 | C |
| ATOM | 1724 | C    | THR | 110 | -7.237  | -6.472 | 14.494 | 0.00 | 0.00 | C |
| ATOM | 1725 | O    | THR | 110 | -6.497  | -5.644 | 14.055 | 0.00 | 0.00 | O |
| ATOM | 1726 | CB   | THR | 110 | -8.108  | -6.672 | 16.787 | 0.00 | 0.00 | C |
| ATOM | 1727 | CG2  | THR | 110 | -8.158  | -7.442 | 18.121 | 0.00 | 0.00 | C |
| ATOM | 1728 | OG1  | THR | 110 | -8.107  | -5.325 | 17.043 | 0.00 | 0.00 | O |
| ATOM | 1729 | H    | THR | 110 | -5.461  | -5.861 | 16.587 | 0.00 | 0.00 | H |
| ATOM | 1730 | HA   | THR | 110 | -6.976  | -8.242 | 15.636 | 0.00 | 0.00 | H |
| ATOM | 1731 | HB   | THR | 110 | -9.042  | -6.900 | 16.273 | 0.00 | 0.00 | H |
| ATOM | 1732 | HG1  | THR | 110 | -8.707  | -5.199 | 17.783 | 0.00 | 0.00 | H |
| ATOM | 1733 | 1HG2 | THR | 110 | -8.339  | -8.508 | 17.978 | 0.00 | 0.00 | H |
| ATOM | 1734 | 2HG2 | THR | 110 | -7.267  | -7.267 | 18.726 | 0.00 | 0.00 | H |
| ATOM | 1735 | 3HG2 | THR | 110 | -9.044  | -7.056 | 18.625 | 0.00 | 0.00 | H |
| ATOM | 1736 | N    | ALA | 111 | -8.322  | -6.900 | 13.838 | 0.00 | 0.00 | N |
| ATOM | 1737 | CA   | ALA | 111 | -8.868  | -6.319 | 12.599 | 0.00 | 0.00 | C |
| ATOM | 1738 | C    | ALA | 111 | -9.383  | -4.939 | 12.793 | 0.00 | 0.00 | C |
| ATOM | 1739 | O    | ALA | 111 | -9.277  | -4.018 | 11.992 | 0.00 | 0.00 | O |
| ATOM | 1740 | CB   | ALA | 111 | -9.918  | -7.306 | 12.033 | 0.00 | 0.00 | C |
| ATOM | 1741 | H    | ALA | 111 | -8.753  | -7.742 | 14.191 | 0.00 | 0.00 | H |
| ATOM | 1742 | HA   | ALA | 111 | -8.022  | -6.270 | 11.913 | 0.00 | 0.00 | H |
| ATOM | 1743 | HB1  | ALA | 111 | -10.545 | -6.857 | 11.264 | 0.00 | 0.00 | H |
| ATOM | 1744 | HB2  | ALA | 111 | -9.550  | -8.288 | 11.737 | 0.00 | 0.00 | H |
| ATOM | 1745 | HB3  | ALA | 111 | -10.684 | -7.418 | 12.801 | 0.00 | 0.00 | H |
| ATOM | 1746 | N    | GLU | 112 | -10.292 | -4.859 | 13.747 | 0.00 | 0.00 | N |
| ATOM | 1747 | CA   | GLU | 112 | -11.118 | -3.695 | 14.155 | 0.00 | 0.00 | C |
| ATOM | 1748 | C    | GLU | 112 | -10.127 | -2.529 | 14.551 | 0.00 | 0.00 | C |
| ATOM | 1749 | O    | GLU | 112 | -10.169 | -1.447 | 13.968 | 0.00 | 0.00 | O |
| ATOM | 1750 | CB   | GLU | 112 | -12.154 | -4.091 | 15.206 | 0.00 | 0.00 | C |
| ATOM | 1751 | CG   | GLU | 112 | -13.293 | -5.121 | 14.875 | 0.00 | 0.00 | C |
| ATOM | 1752 | CD   | GLU | 112 | -12.828 | -6.567 | 14.981 | 0.00 | 0.00 | C |
| ATOM | 1753 | OE1  | GLU | 112 | -11.858 | -6.827 | 15.686 | 0.00 | 0.00 | O |
| ATOM | 1754 | OE2  | GLU | 112 | -13.437 | -7.480 | 14.349 | 0.00 | 0.00 | O |
| ATOM | 1755 | H    | GLU | 112 | -10.410 | -5.719 | 14.261 | 0.00 | 0.00 | H |
| ATOM | 1756 | HA   | GLU | 112 | -11.665 | -3.330 | 13.287 | 0.00 | 0.00 | H |
| ATOM | 1757 | HB2  | GLU | 112 | -11.699 | -4.319 | 16.170 | 0.00 | 0.00 | H |
| ATOM | 1758 | HB3  | GLU | 112 | -12.558 | -3.117 | 15.478 | 0.00 | 0.00 | H |

|      |      |      |     |     |         |        |        |      |      |   |
|------|------|------|-----|-----|---------|--------|--------|------|------|---|
| ATOM | 1759 | HG2  | GLU | 112 | -14.058 | -5.008 | 15.643 | 0.00 | 0.00 | H |
| ATOM | 1760 | HG3  | GLU | 112 | -13.777 | -4.943 | 13.915 | 0.00 | 0.00 | H |
| ATOM | 1761 | N    | ASN | 113 | -9.041  | -2.798 | 15.302 | 0.00 | 0.00 | N |
| ATOM | 1762 | CA   | ASN | 113 | -8.044  | -1.820 | 15.599 | 0.00 | 0.00 | C |
| ATOM | 1763 | C    | ASN | 113 | -7.125  | -1.575 | 14.480 | 0.00 | 0.00 | C |
| ATOM | 1764 | O    | ASN | 113 | -6.568  | -0.538 | 14.478 | 0.00 | 0.00 | O |
| ATOM | 1765 | CB   | ASN | 113 | -7.324  | -2.059 | 16.924 | 0.00 | 0.00 | C |
| ATOM | 1766 | CG   | ASN | 113 | -6.765  | -0.871 | 17.619 | 0.00 | 0.00 | C |
| ATOM | 1767 | ND2  | ASN | 113 | -7.492  | 0.215  | 17.935 | 0.00 | 0.00 | N |
| ATOM | 1768 | OD1  | ASN | 113 | -5.580  | -0.936 | 17.954 | 0.00 | 0.00 | O |
| ATOM | 1769 | H    | ASN | 113 | -9.001  | -3.639 | 15.862 | 0.00 | 0.00 | H |
| ATOM | 1770 | HA   | ASN | 113 | -8.607  | -0.898 | 15.745 | 0.00 | 0.00 | H |
| ATOM | 1771 | HB2  | ASN | 113 | -8.011  | -2.537 | 17.620 | 0.00 | 0.00 | H |
| ATOM | 1772 | HB3  | ASN | 113 | -6.519  | -2.790 | 16.852 | 0.00 | 0.00 | H |
| ATOM | 1773 | 1HD2 | ASN | 113 | -7.122  | 0.875  | 18.605 | 0.00 | 0.00 | H |
| ATOM | 1774 | 2HD2 | ASN | 113 | -8.484  | 0.277  | 17.766 | 0.00 | 0.00 | H |
| ATOM | 1775 | N    | ALA | 114 | -7.027  | -2.555 | 13.556 | 0.00 | 0.00 | N |
| ATOM | 1776 | CA   | ALA | 114 | -6.324  | -2.290 | 12.270 | 0.00 | 0.00 | C |
| ATOM | 1777 | C    | ALA | 114 | -7.089  | -1.262 | 11.440 | 0.00 | 0.00 | C |
| ATOM | 1778 | O    | ALA | 114 | -6.500  | -0.304 | 10.996 | 0.00 | 0.00 | O |
| ATOM | 1779 | CB   | ALA | 114 | -6.079  | -3.593 | 11.431 | 0.00 | 0.00 | C |
| ATOM | 1780 | H    | ALA | 114 | -7.528  | -3.428 | 13.644 | 0.00 | 0.00 | H |
| ATOM | 1781 | HA   | ALA | 114 | -5.347  | -1.859 | 12.492 | 0.00 | 0.00 | H |
| ATOM | 1782 | HB1  | ALA | 114 | -5.123  | -3.934 | 11.828 | 0.00 | 0.00 | H |
| ATOM | 1783 | HB2  | ALA | 114 | -6.801  | -4.410 | 11.460 | 0.00 | 0.00 | H |
| ATOM | 1784 | HB3  | ALA | 114 | -5.968  | -3.307 | 10.385 | 0.00 | 0.00 | H |
| ATOM | 1785 | N    | TYR | 115 | -8.396  | -1.445 | 11.334 | 0.00 | 0.00 | N |
| ATOM | 1786 | CA   | TYR | 115 | -9.335  | -0.423 | 10.723 | 0.00 | 0.00 | C |
| ATOM | 1787 | C    | TYR | 115 | -9.143  | 0.991  | 11.298 | 0.00 | 0.00 | C |
| ATOM | 1788 | O    | TYR | 115 | -9.083  | 2.052  | 10.600 | 0.00 | 0.00 | O |
| ATOM | 1789 | CB   | TYR | 115 | -10.837 | -0.793 | 10.879 | 0.00 | 0.00 | C |
| ATOM | 1790 | CG   | TYR | 115 | -11.424 | -1.862 | 10.012 | 0.00 | 0.00 | C |
| ATOM | 1791 | CD1  | TYR | 115 | -10.569 | -2.815 | 9.391  | 0.00 | 0.00 | C |
| ATOM | 1792 | CD2  | TYR | 115 | -12.813 | -1.938 | 9.779  | 0.00 | 0.00 | C |
| ATOM | 1793 | CE1  | TYR | 115 | -11.144 | -3.711 | 8.469  | 0.00 | 0.00 | C |
| ATOM | 1794 | CE2  | TYR | 115 | -13.365 | -2.855 | 8.899  | 0.00 | 0.00 | C |
| ATOM | 1795 | CZ   | TYR | 115 | -12.528 | -3.783 | 8.227  | 0.00 | 0.00 | C |
| ATOM | 1796 | OH   | TYR | 115 | -12.975 | -4.901 | 7.583  | 0.00 | 0.00 | O |
| ATOM | 1797 | H    | TYR | 115 | -8.779  | -2.304 | 11.700 | 0.00 | 0.00 | H |
| ATOM | 1798 | HA   | TYR | 115 | -9.203  | -0.353 | 9.643  | 0.00 | 0.00 | H |
| ATOM | 1799 | HB2  | TYR | 115 | -10.993 | -1.138 | 11.901 | 0.00 | 0.00 | H |
| ATOM | 1800 | HB3  | TYR | 115 | -11.436 | 0.102  | 10.709 | 0.00 | 0.00 | H |
| ATOM | 1801 | HD1  | TYR | 115 | -9.513  | -2.922 | 9.588  | 0.00 | 0.00 | H |
| ATOM | 1802 | HD2  | TYR | 115 | -13.413 | -1.274 | 10.385 | 0.00 | 0.00 | H |
| ATOM | 1803 | HE1  | TYR | 115 | -10.467 | -4.346 | 7.916  | 0.00 | 0.00 | H |
| ATOM | 1804 | HE2  | TYR | 115 | -14.440 | -2.894 | 8.807  | 0.00 | 0.00 | H |
| ATOM | 1805 | HH   | TYR | 115 | -13.923 | -4.831 | 7.461  | 0.00 | 0.00 | H |
| ATOM | 1806 | N    | GLU | 116 | -9.164  | 1.091  | 12.615 | 0.00 | 0.00 | N |
| ATOM | 1807 | CA   | GLU | 116 | -9.154  | 2.347  | 13.423 | 0.00 | 0.00 | C |
| ATOM | 1808 | C    | GLU | 116 | -7.826  | 2.969  | 13.302 | 0.00 | 0.00 | C |
| ATOM | 1809 | O    | GLU | 116 | -7.845  | 4.131  | 13.038 | 0.00 | 0.00 | O |
| ATOM | 1810 | CB   | GLU | 116 | -9.398  | 2.026  | 14.924 | 0.00 | 0.00 | C |
| ATOM | 1811 | CG   | GLU | 116 | -10.015 | 3.173  | 15.712 | 0.00 | 0.00 | C |
| ATOM | 1812 | CD   | GLU | 116 | -10.181 | 2.747  | 17.165 | 0.00 | 0.00 | C |
| ATOM | 1813 | OE1  | GLU | 116 | -9.720  | 3.411  | 18.097 | 0.00 | 0.00 | O |
| ATOM | 1814 | OE2  | GLU | 116 | -10.895 | 1.782  | 17.466 | 0.00 | 0.00 | O |
| ATOM | 1815 | H    | GLU | 116 | -9.173  | 0.220  | 13.128 | 0.00 | 0.00 | H |
| ATOM | 1816 | HA   | GLU | 116 | -9.975  | 2.909  | 12.978 | 0.00 | 0.00 | H |
| ATOM | 1817 | HB2  | GLU | 116 | -9.884  | 1.059  | 15.066 | 0.00 | 0.00 | H |
| ATOM | 1818 | HB3  | GLU | 116 | -8.403  | 1.871  | 15.339 | 0.00 | 0.00 | H |
| ATOM | 1819 | HG2  | GLU | 116 | -9.438  | 4.097  | 15.699 | 0.00 | 0.00 | H |
| ATOM | 1820 | HG3  | GLU | 116 | -11.022 | 3.423  | 15.379 | 0.00 | 0.00 | H |
| ATOM | 1821 | N    | TYR | 117 | -6.710  | 2.271  | 13.416 | 0.00 | 0.00 | N |
| ATOM | 1822 | CA   | TYR | 117 | -5.352  | 2.864  | 13.328 | 0.00 | 0.00 | C |
| ATOM | 1823 | C    | TYR | 117 | -5.045  | 3.216  | 11.905 | 0.00 | 0.00 | C |
| ATOM | 1824 | O    | TYR | 117 | -4.481  | 4.286  | 11.730 | 0.00 | 0.00 | O |
| ATOM | 1825 | CB   | TYR | 117 | -4.376  | 1.841  | 13.904 | 0.00 | 0.00 | C |
| ATOM | 1826 | CG   | TYR | 117 | -3.006  | 2.456  | 14.031 | 0.00 | 0.00 | C |
| ATOM | 1827 | CD1  | TYR | 117 | -2.680  | 3.162  | 15.164 | 0.00 | 0.00 | C |
| ATOM | 1828 | CD2  | TYR | 117 | -1.983  | 2.214  | 13.033 | 0.00 | 0.00 | C |
| ATOM | 1829 | CE1  | TYR | 117 | -1.460  | 3.724  | 15.339 | 0.00 | 0.00 | C |
| ATOM | 1830 | CE2  | TYR | 117 | -0.815  | 2.921  | 13.108 | 0.00 | 0.00 | C |
| ATOM | 1831 | CZ   | TYR | 117 | -0.499  | 3.679  | 14.274 | 0.00 | 0.00 | C |
| ATOM | 1832 | OH   | TYR | 117 | 0.728   | 4.221  | 14.503 | 0.00 | 0.00 | O |
| ATOM | 1833 | H    | TYR | 117 | -6.890  | 1.299  | 13.617 | 0.00 | 0.00 | H |
| ATOM | 1834 | HA   | TYR | 117 | -5.283  | 3.716  | 14.006 | 0.00 | 0.00 | H |
| ATOM | 1835 | HB2  | TYR | 117 | -4.726  | 1.517  | 14.885 | 0.00 | 0.00 | H |
| ATOM | 1836 | HB3  | TYR | 117 | -4.281  | 1.056  | 13.153 | 0.00 | 0.00 | H |
| ATOM | 1837 | HD1  | TYR | 117 | -3.410  | 3.187  | 15.958 | 0.00 | 0.00 | H |
| ATOM | 1838 | HD2  | TYR | 117 | -2.227  | 1.648  | 12.146 | 0.00 | 0.00 | H |
| ATOM | 1839 | HE1  | TYR | 117 | -1.236  | 4.202  | 16.280 | 0.00 | 0.00 | H |
| ATOM | 1840 | HE2  | TYR | 117 | -0.124  | 2.862  | 12.281 | 0.00 | 0.00 | H |
| ATOM | 1841 | HH   | TYR | 117 | 0.763   | 4.660  | 15.356 | 0.00 | 0.00 | H |
| ATOM | 1842 | N    | PHE | 118 | -5.428  | 2.411  | 10.923 | 0.00 | 0.00 | N |
| ATOM | 1843 | CA   | PHE | 118 | -5.437  | 2.845  | 9.483  | 0.00 | 0.00 | C |
| ATOM | 1844 | C    | PHE | 118 | -6.171  | 4.193  | 9.290  | 0.00 | 0.00 | C |
| ATOM | 1845 | O    | PHE | 118 | -5.695  | 5.097  | 8.552  | 0.00 | 0.00 | O |
| ATOM | 1846 | CB   | PHE | 118 | -5.993  | 1.803  | 8.566  | 0.00 | 0.00 | C |
| ATOM | 1847 | CG   | PHE | 118 | -5.697  | 2.193  | 7.173  | 0.00 | 0.00 | C |
| ATOM | 1848 | CD1  | PHE | 118 | -4.353  | 2.134  | 6.685  | 0.00 | 0.00 | C |
| ATOM | 1849 | CD2  | PHE | 118 | -6.689  | 2.678  | 6.312  | 0.00 | 0.00 | C |
| ATOM | 1850 | CE1  | PHE | 118 | -4.088  | 2.453  | 5.374  | 0.00 | 0.00 | C |
| ATOM | 1851 | CE2  | PHE | 118 | -6.362  | 3.013  | 4.968  | 0.00 | 0.00 | C |
| ATOM | 1852 | CZ   | PHE | 118 | -5.066  | 2.908  | 4.494  | 0.00 | 0.00 | C |
| ATOM | 1853 | H    | PHE | 118 | -5.920  | 1.566  | 11.180 | 0.00 | 0.00 | H |
| ATOM | 1854 | HA   | PHE | 118 | -4.398  | 2.986  | 9.188  | 0.00 | 0.00 | H |
| ATOM | 1855 | HB2  | PHE | 118 | -5.563  | 0.830  | 8.805  | 0.00 | 0.00 | H |
| ATOM | 1856 | HB3  | PHE | 118 | -7.081  | 1.842  | 8.616  | 0.00 | 0.00 | H |
| ATOM | 1857 | HD1  | PHE | 118 | -3.571  | 1.846  | 7.371  | 0.00 | 0.00 | H |
| ATOM | 1858 | HD2  | PHE | 118 | -7.726  | 2.771  | 6.596  | 0.00 | 0.00 | H |
| ATOM | 1859 | HE1  | PHE | 118 | -3.088  | 2.437  | 4.967  | 0.00 | 0.00 | H |
| ATOM | 1860 | HE2  | PHE | 118 | -7.097  | 3.418  | 4.288  | 0.00 | 0.00 | H |
| ATOM | 1861 | HZ   | PHE | 118 | -4.800  | 3.268  | 3.511  | 0.00 | 0.00 | H |
| ATOM | 1862 | N    | THR | 119 | -7.302  | 4.360  | 9.878  | 0.00 | 0.00 | N |
| ATOM | 1863 | CA   | THR | 119 | -8.105  | 5.608  | 9.764  | 0.00 | 0.00 | C |

|      |      |      |     |     |         |        |        |      |      |   |
|------|------|------|-----|-----|---------|--------|--------|------|------|---|
| ATOM | 1864 | C    | THR | 119 | -7.411  | 6.793  | 10.458 | 0.00 | 0.00 | C |
| ATOM | 1865 | O    | THR | 119 | -7.313  | 7.945  | 9.935  | 0.00 | 0.00 | O |
| ATOM | 1866 | CB   | THR | 119 | -9.462  | 5.342  | 10.326 | 0.00 | 0.00 | C |
| ATOM | 1867 | CG2  | THR | 119 | -10.389 | 6.597  | 10.301 | 0.00 | 0.00 | C |
| ATOM | 1868 | OG1  | THR | 119 | -10.027 | 4.355  | 9.482  | 0.00 | 0.00 | O |
| ATOM | 1869 | H    | THR | 119 | -7.592  | 3.719  | 10.601 | 0.00 | 0.00 | H |
| ATOM | 1870 | HA   | THR | 119 | -8.300  | 5.919  | 8.738  | 0.00 | 0.00 | H |
| ATOM | 1871 | HB   | THR | 119 | -9.331  | 5.078  | 11.375 | 0.00 | 0.00 | H |
| ATOM | 1872 | HG1  | THR | 119 | -9.572  | 3.601  | 9.865  | 0.00 | 0.00 | H |
| ATOM | 1873 | 1HG2 | THR | 119 | -10.090 | 7.548  | 10.741 | 0.00 | 0.00 | H |
| ATOM | 1874 | 2HG2 | THR | 119 | -10.753 | 6.759  | 9.287  | 0.00 | 0.00 | H |
| ATOM | 1875 | 3HG2 | THR | 119 | -11.317 | 6.439  | 10.850 | 0.00 | 0.00 | H |
| ATOM | 1876 | N    | LYS | 120 | -6.812  | 6.533  | 11.648 | 0.00 | 0.00 | N |
| ATOM | 1877 | CA   | LYS | 120 | -6.187  | 7.514  | 12.580 | 0.00 | 0.00 | C |
| ATOM | 1878 | C    | LYS | 120 | -4.969  | 8.047  | 11.934 | 0.00 | 0.00 | C |
| ATOM | 1879 | O    | LYS | 120 | -4.855  | 9.234  | 11.806 | 0.00 | 0.00 | O |
| ATOM | 1880 | CB   | LYS | 120 | -5.860  | 6.825  | 13.949 | 0.00 | 0.00 | C |
| ATOM | 1881 | CG   | LYS | 120 | -6.908  | 6.745  | 14.996 | 0.00 | 0.00 | C |
| ATOM | 1882 | CD   | LYS | 120 | -6.447  | 5.734  | 16.075 | 0.00 | 0.00 | C |
| ATOM | 1883 | CE   | LYS | 120 | -7.320  | 5.534  | 17.271 | 0.00 | 0.00 | C |
| ATOM | 1884 | NZ   | LYS | 120 | -7.676  | 6.776  | 17.881 | 0.00 | 0.00 | N |
| ATOM | 1885 | H    | LYS | 120 | -6.973  | 5.635  | 12.080 | 0.00 | 0.00 | H |
| ATOM | 1886 | HA   | LYS | 120 | -6.825  | 8.381  | 12.753 | 0.00 | 0.00 | H |
| ATOM | 1887 | HB2  | LYS | 120 | -5.597  | 5.816  | 13.632 | 0.00 | 0.00 | H |
| ATOM | 1888 | HB3  | LYS | 120 | -4.917  | 7.226  | 14.319 | 0.00 | 0.00 | H |
| ATOM | 1889 | HG2  | LYS | 120 | -6.893  | 7.686  | 15.544 | 0.00 | 0.00 | H |
| ATOM | 1890 | HG3  | LYS | 120 | -7.933  | 6.529  | 14.693 | 0.00 | 0.00 | H |
| ATOM | 1891 | HD2  | LYS | 120 | -6.288  | 4.730  | 15.680 | 0.00 | 0.00 | H |
| ATOM | 1892 | HD3  | LYS | 120 | -5.459  | 6.067  | 16.393 | 0.00 | 0.00 | H |
| ATOM | 1893 | HE2  | LYS | 120 | -8.222  | 5.036  | 16.913 | 0.00 | 0.00 | H |
| ATOM | 1894 | HE3  | LYS | 120 | -6.851  | 4.830  | 17.958 | 0.00 | 0.00 | H |
| ATOM | 1895 | HZ1  | LYS | 120 | -6.858  | 7.278  | 18.193 | 0.00 | 0.00 | H |
| ATOM | 1896 | HZ2  | LYS | 120 | -8.230  | 7.402  | 17.315 | 0.00 | 0.00 | H |
| ATOM | 1897 | HZ3  | LYS | 120 | -8.244  | 6.749  | 18.714 | 0.00 | 0.00 | H |
| ATOM | 1898 | N    | ILE | 121 | -4.100  | 7.216  | 11.287 | 0.00 | 0.00 | N |
| ATOM | 1899 | CA   | ILE | 121 | -2.967  | 7.760  | 10.550 | 0.00 | 0.00 | C |
| ATOM | 1900 | C    | ILE | 121 | -3.406  | 8.464  | 9.197  | 0.00 | 0.00 | C |
| ATOM | 1901 | O    | ILE | 121 | -2.937  | 9.545  | 8.907  | 0.00 | 0.00 | O |
| ATOM | 1902 | CB   | ILE | 121 | -1.897  | 6.702  | 10.354 | 0.00 | 0.00 | C |
| ATOM | 1903 | CG1  | ILE | 121 | -2.157  | 5.485  | 9.394  | 0.00 | 0.00 | C |
| ATOM | 1904 | CG2  | ILE | 121 | -1.525  | 6.163  | 11.729 | 0.00 | 0.00 | C |
| ATOM | 1905 | CD1  | ILE | 121 | -2.130  | 5.542  | 7.911  | 0.00 | 0.00 | C |
| ATOM | 1906 | H    | ILE | 121 | -4.201  | 6.214  | 11.194 | 0.00 | 0.00 | H |
| ATOM | 1907 | HA   | ILE | 121 | -2.521  | 8.517  | 11.197 | 0.00 | 0.00 | H |
| ATOM | 1908 | HB   | ILE | 121 | -1.087  | 7.337  | 9.998  | 0.00 | 0.00 | H |
| ATOM | 1909 | 2HG1 | ILE | 121 | -1.334  | 4.811  | 9.631  | 0.00 | 0.00 | H |
| ATOM | 1910 | 3HG1 | ILE | 121 | -2.998  | 4.839  | 9.643  | 0.00 | 0.00 | H |
| ATOM | 1911 | 1HG2 | ILE | 121 | -2.297  | 5.461  | 12.044 | 0.00 | 0.00 | H |
| ATOM | 1912 | 2HG2 | ILE | 121 | -0.575  | 5.636  | 11.827 | 0.00 | 0.00 | H |
| ATOM | 1913 | 3HG2 | ILE | 121 | -1.692  | 6.956  | 12.458 | 0.00 | 0.00 | H |
| ATOM | 1914 | 1HD1 | ILE | 121 | -2.992  | 6.098  | 7.541  | 0.00 | 0.00 | H |
| ATOM | 1915 | 2HD1 | ILE | 121 | -1.369  | 6.199  | 7.489  | 0.00 | 0.00 | H |
| ATOM | 1916 | 3HD1 | ILE | 121 | -2.110  | 4.569  | 7.420  | 0.00 | 0.00 | H |
| ATOM | 1917 | N    | ALA | 122 | -4.328  | 7.825  | 8.464  | 0.00 | 0.00 | N |
| ATOM | 1918 | CA   | ALA | 122 | -4.720  | 8.231  | 7.115  | 0.00 | 0.00 | C |
| ATOM | 1919 | C    | ALA | 122 | -5.455  | 9.543  | 7.001  | 0.00 | 0.00 | C |
| ATOM | 1920 | O    | ALA | 122 | -5.275  | 10.193 | 6.001  | 0.00 | 0.00 | O |
| ATOM | 1921 | CB   | ALA | 122 | -5.605  | 7.152  | 6.372  | 0.00 | 0.00 | C |
| ATOM | 1922 | H    | ALA | 122 | -4.519  | 6.901  | 8.821  | 0.00 | 0.00 | H |
| ATOM | 1923 | HA   | ALA | 122 | -3.787  | 8.328  | 6.560  | 0.00 | 0.00 | H |
| ATOM | 1924 | HB1  | ALA | 122 | -4.997  | 6.247  | 6.387  | 0.00 | 0.00 | H |
| ATOM | 1925 | HB2  | ALA | 122 | -6.543  | 6.977  | 6.899  | 0.00 | 0.00 | H |
| ATOM | 1926 | HB3  | ALA | 122 | -5.771  | 7.554  | 5.373  | 0.00 | 0.00 | H |
| ATOM | 1927 | N    | THR | 123 | -6.187  | 9.936  | 8.072  | 0.00 | 0.00 | N |
| ATOM | 1928 | CA   | THR | 123 | -6.838  | 11.263 | 8.212  | 0.00 | 0.00 | C |
| ATOM | 1929 | C    | THR | 123 | -5.867  | 12.417 | 8.560  | 0.00 | 0.00 | C |
| ATOM | 1930 | O    | THR | 123 | -6.339  | 13.583 | 8.522  | 0.00 | 0.00 | O |
| ATOM | 1931 | CB   | THR | 123 | -8.080  | 11.227 | 9.114  | 0.00 | 0.00 | C |
| ATOM | 1932 | CG2  | THR | 123 | -9.190  | 10.354 | 8.619  | 0.00 | 0.00 | C |
| ATOM | 1933 | OG1  | THR | 123 | -7.722  | 10.901 | 10.446 | 0.00 | 0.00 | O |
| ATOM | 1934 | H    | THR | 123 | -6.205  | 9.259  | 8.821  | 0.00 | 0.00 | H |
| ATOM | 1935 | HA   | THR | 123 | -7.192  | 11.526 | 7.214  | 0.00 | 0.00 | H |
| ATOM | 1936 | HB   | THR | 123 | -8.344  | 12.285 | 9.106  | 0.00 | 0.00 | H |
| ATOM | 1937 | HG1  | THR | 123 | -7.530  | 9.968  | 10.564 | 0.00 | 0.00 | H |
| ATOM | 1938 | 1HG2 | THR | 123 | -8.815  | 9.371  | 8.332  | 0.00 | 0.00 | H |
| ATOM | 1939 | 2HG2 | THR | 123 | -9.888  | 10.336 | 9.457  | 0.00 | 0.00 | H |
| ATOM | 1940 | 3HG2 | THR | 123 | -9.703  | 10.850 | 7.795  | 0.00 | 0.00 | H |
| ATOM | 1941 | N    | SER | 124 | -4.558  | 12.157 | 8.832  | 0.00 | 0.00 | N |
| ATOM | 1942 | CA   | SER | 124 | -3.596  | 13.239 | 8.846  | 0.00 | 0.00 | C |
| ATOM | 1943 | C    | SER | 124 | -2.430  | 13.242 | 7.809  | 0.00 | 0.00 | C |
| ATOM | 1944 | O    | SER | 124 | -1.680  | 14.210 | 7.672  | 0.00 | 0.00 | O |
| ATOM | 1945 | CB   | SER | 124 | -3.104  | 13.662 | 10.243 | 0.00 | 0.00 | C |
| ATOM | 1946 | OG   | SER | 124 | -4.131  | 14.066 | 11.094 | 0.00 | 0.00 | O |
| ATOM | 1947 | H    | SER | 124 | -4.123  | 11.258 | 8.977  | 0.00 | 0.00 | H |
| ATOM | 1948 | HA   | SER | 124 | -4.101  | 14.166 | 8.571  | 0.00 | 0.00 | H |
| ATOM | 1949 | HB2  | SER | 124 | -2.631  | 12.792 | 10.702 | 0.00 | 0.00 | H |
| ATOM | 1950 | HB3  | SER | 124 | -2.350  | 14.449 | 10.191 | 0.00 | 0.00 | H |
| ATOM | 1951 | HG   | SER | 124 | -4.390  | 13.234 | 11.498 | 0.00 | 0.00 | H |
| ATOM | 1952 | N    | LEU | 125 | -2.418  | 12.233 | 6.949  | 0.00 | 0.00 | N |
| ATOM | 1953 | CA   | LEU | 125 | -1.417  | 12.032 | 5.874  | 0.00 | 0.00 | C |
| ATOM | 1954 | C    | LEU | 125 | -1.529  | 13.047 | 4.698  | 0.00 | 0.00 | C |
| ATOM | 1955 | O    | LEU | 125 | -0.537  | 13.471 | 4.102  | 0.00 | 0.00 | O |
| ATOM | 1956 | CB   | LEU | 125 | -1.582  | 10.527 | 5.532  | 0.00 | 0.00 | C |
| ATOM | 1957 | CG   | LEU | 125 | -0.724  | 10.106 | 4.317  | 0.00 | 0.00 | C |
| ATOM | 1958 | CD1  | LEU | 125 | 0.741   | 10.236 | 4.661  | 0.00 | 0.00 | C |
| ATOM | 1959 | CD2  | LEU | 125 | -1.104  | 8.729  | 3.930  | 0.00 | 0.00 | C |
| ATOM | 1960 | H    | LEU | 125 | -3.021  | 11.437 | 7.106  | 0.00 | 0.00 | H |
| ATOM | 1961 | HA   | LEU | 125 | -0.405  | 12.242 | 6.222  | 0.00 | 0.00 | H |
| ATOM | 1962 | HB2  | LEU | 125 | -1.326  | 9.872  | 6.365  | 0.00 | 0.00 | H |
| ATOM | 1963 | HB3  | LEU | 125 | -2.618  | 10.325 | 5.258  | 0.00 | 0.00 | H |
| ATOM | 1964 | HG   | LEU | 125 | -1.094  | 10.755 | 3.522  | 0.00 | 0.00 | H |
| ATOM | 1965 | 1HD1 | LEU | 125 | 1.445   | 9.707  | 4.018  | 0.00 | 0.00 | H |
| ATOM | 1966 | 2HD1 | LEU | 125 | 0.998   | 9.719  | 5.584  | 0.00 | 0.00 | H |
| ATOM | 1967 | 3HD1 | LEU | 125 | 1.087   | 11.268 | 4.680  | 0.00 | 0.00 | H |
| ATOM | 1968 | 1HD2 | LEU | 125 | -2.185  | 8.685  | 3.798  | 0.00 | 0.00 | H |

|      |      |      |     |     |        |        |        |      |      |   |
|------|------|------|-----|-----|--------|--------|--------|------|------|---|
| ATOM | 1969 | ZHD2 | LEU | 125 | -0.599 | 8.337  | 3.046  | 0.00 | 0.00 | H |
| ATOM | 1970 | 3HD2 | LEU | 125 | -0.733 | 8.014  | 4.665  | 0.00 | 0.00 | H |
| ATOM | 1971 | N    | PHE | 126 | -2.682 | 13.457 | 4.422  | 0.00 | 0.00 | N |
| ATOM | 1972 | CA   | PHE | 126 | -3.081 | 14.203 | 3.201  | 0.00 | 0.00 | C |
| ATOM | 1973 | C    | PHE | 126 | -3.586 | 15.614 | 3.377  | 0.00 | 0.00 | C |
| ATOM | 1974 | O    | PHE | 126 | -3.575 | 16.414 | 2.443  | 0.00 | 0.00 | O |
| ATOM | 1975 | CB   | PHE | 126 | -4.094 | 13.454 | 2.429  | 0.00 | 0.00 | C |
| ATOM | 1976 | CG   | PHE | 126 | -3.765 | 12.001 | 2.167  | 0.00 | 0.00 | C |
| ATOM | 1977 | CD1  | PHE | 126 | -2.851 | 11.635 | 1.150  | 0.00 | 0.00 | C |
| ATOM | 1978 | CD2  | PHE | 126 | -4.710 | 11.004 | 2.616  | 0.00 | 0.00 | C |
| ATOM | 1979 | CE1  | PHE | 126 | -2.834 | 10.372 | 0.585  | 0.00 | 0.00 | C |
| ATOM | 1980 | CE2  | PHE | 126 | -4.599 | 9.659  | 2.127  | 0.00 | 0.00 | C |
| ATOM | 1981 | CZ   | PHE | 126 | -3.597 | 9.359  | 1.129  | 0.00 | 0.00 | C |
| ATOM | 1982 | H    | PHE | 126 | -3.450 | 13.218 | 5.033  | 0.00 | 0.00 | H |
| ATOM | 1983 | HA   | PHE | 126 | -2.289 | 14.128 | 2.457  | 0.00 | 0.00 | H |
| ATOM | 1984 | HB2  | PHE | 126 | -4.996 | 13.407 | 3.040  | 0.00 | 0.00 | H |
| ATOM | 1985 | HB3  | PHE | 126 | -4.363 | 14.011 | 1.533  | 0.00 | 0.00 | H |
| ATOM | 1986 | HD1  | PHE | 126 | -2.223 | 12.406 | 0.729  | 0.00 | 0.00 | H |
| ATOM | 1987 | HD2  | PHE | 126 | -5.530 | 11.274 | 3.264  | 0.00 | 0.00 | H |
| ATOM | 1988 | HE1  | PHE | 126 | -2.085 | 10.056 | -0.129 | 0.00 | 0.00 | H |
| ATOM | 1989 | HE2  | PHE | 126 | -5.193 | 8.861  | 2.550  | 0.00 | 0.00 | H |
| ATOM | 1990 | HZ   | PHE | 126 | -3.530 | 8.356  | 0.733  | 0.00 | 0.00 | H |
| ATOM | 1991 | N    | GLU | 127 | -4.032 | 15.984 | 4.583  | 0.00 | 0.00 | N |
| ATOM | 1992 | CA   | GLU | 127 | -4.818 | 17.157 | 4.771  | 0.00 | 0.00 | C |
| ATOM | 1993 | C    | GLU | 127 | -4.010 | 18.506 | 4.723  | 0.00 | 0.00 | C |
| ATOM | 1994 | O    | GLU | 127 | -4.640 | 19.508 | 4.451  | 0.00 | 0.00 | O |
| ATOM | 1995 | CB   | GLU | 127 | -5.699 | 16.921 | 6.015  | 0.00 | 0.00 | C |
| ATOM | 1996 | CG   | GLU | 127 | -5.010 | 16.640 | 7.399  | 0.00 | 0.00 | C |
| ATOM | 1997 | CD   | GLU | 127 | -4.180 | 17.858 | 7.734  | 0.00 | 0.00 | C |
| ATOM | 1998 | OE1  | GLU | 127 | -4.811 | 18.852 | 8.148  | 0.00 | 0.00 | O |
| ATOM | 1999 | OE2  | GLU | 127 | -2.920 | 17.752 | 7.790  | 0.00 | 0.00 | O |
| ATOM | 2000 | H    | GLU | 127 | -4.075 | 15.321 | 5.343  | 0.00 | 0.00 | H |
| ATOM | 2001 | HA   | GLU | 127 | -5.531 | 17.173 | 3.946  | 0.00 | 0.00 | H |
| ATOM | 2002 | HB2  | GLU | 127 | -6.389 | 17.765 | 6.063  | 0.00 | 0.00 | H |
| ATOM | 2003 | HB3  | GLU | 127 | -6.386 | 16.121 | 5.735  | 0.00 | 0.00 | H |
| ATOM | 2004 | HG2  | GLU | 127 | -5.845 | 16.513 | 8.088  | 0.00 | 0.00 | H |
| ATOM | 2005 | HG3  | GLU | 127 | -4.426 | 15.721 | 7.382  | 0.00 | 0.00 | H |
| ATOM | 2006 | N    | SER | 128 | -2.738 | 18.521 | 4.901  | 0.00 | 0.00 | N |
| ATOM | 2007 | CA   | SER | 128 | -1.853 | 19.657 | 4.745  | 0.00 | 0.00 | C |
| ATOM | 2008 | C    | SER | 128 | -1.145 | 19.644 | 3.372  | 0.00 | 0.00 | C |
| ATOM | 2009 | O    | SER | 128 | -0.507 | 20.669 | 3.051  | 0.00 | 0.00 | O |
| ATOM | 2010 | CB   | SER | 128 | -0.947 | 19.846 | 5.971  | 0.00 | 0.00 | C |
| ATOM | 2011 | OG   | SER | 128 | -1.736 | 20.072 | 7.145  | 0.00 | 0.00 | O |
| ATOM | 2012 | H    | SER | 128 | -2.259 | 17.649 | 5.074  | 0.00 | 0.00 | H |
| ATOM | 2013 | HA   | SER | 128 | -2.416 | 20.590 | 4.705  | 0.00 | 0.00 | H |
| ATOM | 2014 | HB2  | SER | 128 | -0.392 | 18.930 | 6.167  | 0.00 | 0.00 | H |
| ATOM | 2015 | HB3  | SER | 128 | -0.256 | 20.675 | 5.821  | 0.00 | 0.00 | H |
| ATOM | 2016 | HG   | SER | 128 | -2.342 | 19.330 | 7.202  | 0.00 | 0.00 | H |
| ATOM | 2017 | N    | GLY | 129 | -1.367 | 18.595 | 2.592  | 0.00 | 0.00 | N |
| ATOM | 2018 | CA   | GLY | 129 | -0.927 | 18.462 | 1.206  | 0.00 | 0.00 | C |
| ATOM | 2019 | C    | GLY | 129 | -1.039 | 17.047 | 0.712  | 0.00 | 0.00 | C |
| ATOM | 2020 | O    | GLY | 129 | -0.716 | 16.149 | 1.468  | 0.00 | 0.00 | O |
| ATOM | 2021 | H    | GLY | 129 | -2.058 | 17.927 | 2.904  | 0.00 | 0.00 | H |
| ATOM | 2022 | HA2  | GLY | 129 | -1.580 | 19.059 | 0.570  | 0.00 | 0.00 | H |
| ATOM | 2023 | HA3  | GLY | 129 | 0.130  | 18.726 | 1.192  | 0.00 | 0.00 | H |
| ATOM | 2024 | N    | ILE | 130 | -1.529 | 16.775 | -0.498 | 0.00 | 0.00 | N |
| ATOM | 2025 | CA   | ILE | 130 | -1.512 | 15.486 | -1.174 | 0.00 | 0.00 | C |
| ATOM | 2026 | C    | ILE | 130 | -0.491 | 15.608 | -2.354 | 0.00 | 0.00 | C |
| ATOM | 2027 | O    | ILE | 130 | -0.463 | 16.542 | -3.128 | 0.00 | 0.00 | O |
| ATOM | 2028 | CB   | ILE | 130 | -2.941 | 14.902 | -1.475 | 0.00 | 0.00 | C |
| ATOM | 2029 | CG1  | ILE | 130 | -2.876 | 13.502 | -2.074 | 0.00 | 0.00 | C |
| ATOM | 2030 | CG2  | ILE | 130 | -3.566 | 15.735 | -2.552 | 0.00 | 0.00 | C |
| ATOM | 2031 | CD1  | ILE | 130 | -4.178 | 12.642 | -1.911 | 0.00 | 0.00 | C |
| ATOM | 2032 | H    | ILE | 130 | -1.804 | 17.510 | -1.132 | 0.00 | 0.00 | H |
| ATOM | 2033 | HA   | ILE | 130 | -0.991 | 14.772 | -0.535 | 0.00 | 0.00 | H |
| ATOM | 2034 | HB   | ILE | 130 | -3.636 | 14.954 | -0.637 | 0.00 | 0.00 | H |
| ATOM | 2035 | ZHG1 | ILE | 130 | -2.653 | 13.543 | -3.142 | 0.00 | 0.00 | H |
| ATOM | 2036 | 3HG1 | ILE | 130 | -2.113 | 13.032 | -1.453 | 0.00 | 0.00 | H |
| ATOM | 2037 | 1HG2 | ILE | 130 | -3.704 | 16.685 | -2.036 | 0.00 | 0.00 | H |
| ATOM | 2038 | ZHG2 | ILE | 130 | -2.931 | 15.866 | -3.427 | 0.00 | 0.00 | H |
| ATOM | 2039 | 3HG2 | ILE | 130 | -4.551 | 15.306 | -2.740 | 0.00 | 0.00 | H |
| ATOM | 2040 | 1HD1 | ILE | 130 | -4.466 | 12.624 | -0.859 | 0.00 | 0.00 | H |
| ATOM | 2041 | ZHD1 | ILE | 130 | -4.931 | 13.040 | -2.589 | 0.00 | 0.00 | H |
| ATOM | 2042 | 3HD1 | ILE | 130 | -4.040 | 11.647 | -2.335 | 0.00 | 0.00 | H |
| ATOM | 2043 | N    | ASN | 131 | 0.414  | 14.611 | -2.513 | 0.00 | 0.00 | N |
| ATOM | 2044 | CA   | ASN | 131 | 1.321  | 14.386 | -3.633 | 0.00 | 0.00 | C |
| ATOM | 2045 | C    | ASN | 131 | 1.368  | 12.940 | -4.029 | 0.00 | 0.00 | C |
| ATOM | 2046 | O    | ASN | 131 | 0.705  | 12.103 | -3.450 | 0.00 | 0.00 | O |
| ATOM | 2047 | CB   | ASN | 131 | 2.739  | 14.995 | -3.338 | 0.00 | 0.00 | C |
| ATOM | 2048 | CG   | ASN | 131 | 3.523  | 14.361 | -2.295 | 0.00 | 0.00 | C |
| ATOM | 2049 | ND2  | ASN | 131 | 4.157  | 15.163 | -1.493 | 0.00 | 0.00 | N |
| ATOM | 2050 | OD1  | ASN | 131 | 3.556  | 13.135 | -2.114 | 0.00 | 0.00 | O |
| ATOM | 2051 | H    | ASN | 131 | 0.122  | 13.774 | -2.027 | 0.00 | 0.00 | H |
| ATOM | 2052 | HA   | ASN | 131 | 0.920  | 15.002 | -4.437 | 0.00 | 0.00 | H |
| ATOM | 2053 | HB2  | ASN | 131 | 3.257  | 14.966 | -4.297 | 0.00 | 0.00 | H |
| ATOM | 2054 | HB3  | ASN | 131 | 2.611  | 16.032 | -3.025 | 0.00 | 0.00 | H |
| ATOM | 2055 | 1HD2 | ASN | 131 | 4.638  | 14.833 | -0.669 | 0.00 | 0.00 | H |
| ATOM | 2056 | ZHD2 | ASN | 131 | 4.094  | 16.160 | -1.647 | 0.00 | 0.00 | H |
| ATOM | 2057 | N    | TRP | 132 | 2.143  | 12.571 | -5.044 | 0.00 | 0.00 | N |
| ATOM | 2058 | CA   | TRP | 132 | 2.344  | 11.262 | -5.547 | 0.00 | 0.00 | C |
| ATOM | 2059 | C    | TRP | 132 | 2.880  | 10.264 | -4.518 | 0.00 | 0.00 | C |
| ATOM | 2060 | O    | TRP | 132 | 2.288  | 9.197  | -4.410 | 0.00 | 0.00 | O |
| ATOM | 2061 | CB   | TRP | 132 | 3.260  | 11.245 | -6.794 | 0.00 | 0.00 | C |
| ATOM | 2062 | CG   | TRP | 132 | 3.319  | 9.976  | -7.493 | 0.00 | 0.00 | C |
| ATOM | 2063 | CD1  | TRP | 132 | 4.348  | 9.653  | -8.293 | 0.00 | 0.00 | C |
| ATOM | 2064 | CD2  | TRP | 132 | 2.366  | 8.868  | -7.670 | 0.00 | 0.00 | C |
| ATOM | 2065 | CE2  | TRP | 132 | 2.973  | 7.926  | -8.584 | 0.00 | 0.00 | C |
| ATOM | 2066 | CE3  | TRP | 132 | 1.070  | 8.593  | -7.223 | 0.00 | 0.00 | C |
| ATOM | 2067 | NE1  | TRP | 132 | 4.197  | 8.434  | -8.872 | 0.00 | 0.00 | N |
| ATOM | 2068 | CZ2  | TRP | 132 | 2.208  | 6.821  | -9.035 | 0.00 | 0.00 | C |
| ATOM | 2069 | CZ3  | TRP | 132 | 0.343  | 7.502  | -7.658 | 0.00 | 0.00 | C |
| ATOM | 2070 | CH2  | TRP | 132 | 0.907  | 6.636  | -8.582 | 0.00 | 0.00 | C |
| ATOM | 2071 | H    | TRP | 132 | 2.625  | 13.280 | -5.578 | 0.00 | 0.00 | H |
| ATOM | 2072 | HA   | TRP | 132 | 1.327  | 11.058 | -5.883 | 0.00 | 0.00 | H |
| ATOM | 2073 | HB2  | TRP | 132 | 2.895  | 11.964 | -7.528 | 0.00 | 0.00 | H |

|      |      |      |     |     |        |        |        |      |      |   |
|------|------|------|-----|-----|--------|--------|--------|------|------|---|
| ATOM | 2074 | HB3  | TRP | 132 | 4.286  | 11.469 | -6.500 | 0.00 | 0.00 | H |
| ATOM | 2075 | HD1  | TRP | 132 | 5.126  | 10.333 | -8.606 | 0.00 | 0.00 | H |
| ATOM | 2076 | HE1  | TRP | 132 | 4.884  | 8.103  | -9.533 | 0.00 | 0.00 | H |
| ATOM | 2077 | HE3  | TRP | 132 | 0.560  | 9.293  | -6.578 | 0.00 | 0.00 | H |
| ATOM | 2078 | HZ2  | TRP | 132 | 2.735  | 6.262  | -9.790 | 0.00 | 0.00 | H |
| ATOM | 2079 | HZ3  | TRP | 132 | -0.644 | 7.245  | -7.301 | 0.00 | 0.00 | H |
| ATOM | 2080 | HH2  | TRP | 132 | 0.328  | 5.768  | -8.859 | 0.00 | 0.00 | H |
| ATOM | 2081 | N    | GLY | 133 | 3.920  | 10.578 | -3.734 | 0.00 | 0.00 | N |
| ATOM | 2082 | CA   | GLY | 133 | 4.569  | 9.711  | -2.694 | 0.00 | 0.00 | C |
| ATOM | 2083 | C    | GLY | 133 | 3.869  | 9.528  | -1.377 | 0.00 | 0.00 | C |
| ATOM | 2084 | O    | GLY | 133 | 4.079  | 8.516  | -0.732 | 0.00 | 0.00 | O |
| ATOM | 2085 | H    | GLY | 133 | 4.460  | 11.403 | -3.954 | 0.00 | 0.00 | H |
| ATOM | 2086 | HA2  | GLY | 133 | 4.826  | 8.722  | -3.074 | 0.00 | 0.00 | H |
| ATOM | 2087 | HA3  | GLY | 133 | 5.467  | 10.242 | -2.377 | 0.00 | 0.00 | H |
| ATOM | 2088 | N    | ARG | 134 | 3.026  | 10.468 | -1.049 | 0.00 | 0.00 | N |
| ATOM | 2089 | CA   | ARG | 134 | 2.041  | 10.316 | 0.083  | 0.00 | 0.00 | C |
| ATOM | 2090 | C    | ARG | 134 | 0.842  | 9.437  | -0.368 | 0.00 | 0.00 | C |
| ATOM | 2091 | O    | ARG | 134 | 0.399  | 8.682  | 0.449  | 0.00 | 0.00 | O |
| ATOM | 2092 | CB   | ARG | 134 | 1.507  | 11.716 | 0.498  | 0.00 | 0.00 | C |
| ATOM | 2093 | CG   | ARG | 134 | 2.514  | 12.615 | 1.185  | 0.00 | 0.00 | C |
| ATOM | 2094 | CD   | ARG | 134 | 2.130  | 14.077 | 1.273  | 0.00 | 0.00 | C |
| ATOM | 2095 | NE   | ARG | 134 | 3.129  | 14.977 | 1.829  | 0.00 | 0.00 | N |
| ATOM | 2096 | CZ   | ARG | 134 | 2.922  | 16.136 | 2.421  | 0.00 | 0.00 | C |
| ATOM | 2097 | NH1  | ARG | 134 | 1.788  | 16.584 | 2.787  | 0.00 | 0.00 | N |
| ATOM | 2098 | NH2  | ARG | 134 | 3.993  | 16.738 | 2.826  | 0.00 | 0.00 | N |
| ATOM | 2099 | H    | ARG | 134 | 3.201  | 11.369 | -1.468 | 0.00 | 0.00 | H |
| ATOM | 2100 | HA   | ARG | 134 | 2.515  | 9.792  | 0.914  | 0.00 | 0.00 | H |
| ATOM | 2101 | HB2  | ARG | 134 | 1.095  | 12.087 | -0.442 | 0.00 | 0.00 | H |
| ATOM | 2102 | HB3  | ARG | 134 | 0.709  | 11.613 | 1.234  | 0.00 | 0.00 | H |
| ATOM | 2103 | HG2  | ARG | 134 | 2.880  | 12.192 | 2.121  | 0.00 | 0.00 | H |
| ATOM | 2104 | HG3  | ARG | 134 | 3.340  | 12.653 | 0.475  | 0.00 | 0.00 | H |
| ATOM | 2105 | HD2  | ARG | 134 | 1.964  | 14.415 | 0.250  | 0.00 | 0.00 | H |
| ATOM | 2106 | HD3  | ARG | 134 | 1.128  | 14.166 | 1.693  | 0.00 | 0.00 | H |
| ATOM | 2107 | HE   | ARG | 134 | 4.098  | 14.807 | 1.603  | 0.00 | 0.00 | H |
| ATOM | 2108 | 1HH1 | ARG | 134 | 0.926  | 16.204 | 2.423  | 0.00 | 0.00 | H |
| ATOM | 2109 | 2HH1 | ARG | 134 | 1.836  | 17.486 | 3.238  | 0.00 | 0.00 | H |
| ATOM | 2110 | 1HH2 | ARG | 134 | 4.865  | 16.435 | 2.418  | 0.00 | 0.00 | H |
| ATOM | 2111 | 2HH2 | ARG | 134 | 3.858  | 17.505 | 3.469  | 0.00 | 0.00 | H |
| ATOM | 2112 | N    | VAL | 135 | 0.558  | 9.343  | -1.637 | 0.00 | 0.00 | N |
| ATOM | 2113 | CA   | VAL | 135 | -0.418 | 8.349  | -2.153 | 0.00 | 0.00 | C |
| ATOM | 2114 | C    | VAL | 135 | 0.258  | 6.954  | -2.182 | 0.00 | 0.00 | C |
| ATOM | 2115 | O    | VAL | 135 | -0.431 | 6.044  | -1.745 | 0.00 | 0.00 | O |
| ATOM | 2116 | CB   | VAL | 135 | -1.179 | 8.737  | -3.439 | 0.00 | 0.00 | C |
| ATOM | 2117 | CG1  | VAL | 135 | -1.987 | 7.556  | -3.981 | 0.00 | 0.00 | C |
| ATOM | 2118 | CG2  | VAL | 135 | -2.118 | 9.975  | -3.282 | 0.00 | 0.00 | C |
| ATOM | 2119 | H    | VAL | 135 | 1.145  | 9.847  | -2.285 | 0.00 | 0.00 | H |
| ATOM | 2120 | HA   | VAL | 135 | -1.223 | 8.192  | -1.435 | 0.00 | 0.00 | H |
| ATOM | 2121 | HB   | VAL | 135 | -0.488 | 9.036  | -4.225 | 0.00 | 0.00 | H |
| ATOM | 2122 | 1HG1 | VAL | 135 | -2.638 | 7.092  | -3.240 | 0.00 | 0.00 | H |
| ATOM | 2123 | 2HG1 | VAL | 135 | -2.588 | 8.018  | -4.764 | 0.00 | 0.00 | H |
| ATOM | 2124 | 3HG1 | VAL | 135 | -1.281 | 6.777  | -4.271 | 0.00 | 0.00 | H |
| ATOM | 2125 | 1HG2 | VAL | 135 | -2.681 | 10.198 | -4.187 | 0.00 | 0.00 | H |
| ATOM | 2126 | 2HG2 | VAL | 135 | -2.784 | 9.815  | -2.434 | 0.00 | 0.00 | H |
| ATOM | 2127 | 3HG2 | VAL | 135 | -1.591 | 10.876 | -2.971 | 0.00 | 0.00 | H |
| ATOM | 2128 | N    | VAL | 136 | 1.517  | 6.778  | -2.548 | 0.00 | 0.00 | N |
| ATOM | 2129 | CA   | VAL | 136 | 2.178  | 5.429  | -2.674 | 0.00 | 0.00 | C |
| ATOM | 2130 | C    | VAL | 136 | 2.679  | 4.893  | -1.383 | 0.00 | 0.00 | C |
| ATOM | 2131 | O    | VAL | 136 | 2.570  | 3.673  | -1.208 | 0.00 | 0.00 | O |
| ATOM | 2132 | CB   | VAL | 136 | 3.261  | 5.513  | -3.784 | 0.00 | 0.00 | C |
| ATOM | 2133 | CG1  | VAL | 136 | 4.009  | 4.106  | -3.770 | 0.00 | 0.00 | C |
| ATOM | 2134 | CG2  | VAL | 136 | 2.709  | 5.894  | -5.196 | 0.00 | 0.00 | C |
| ATOM | 2135 | H    | VAL | 136 | 2.043  | 7.606  | -2.788 | 0.00 | 0.00 | H |
| ATOM | 2136 | HA   | VAL | 136 | 1.453  | 4.692  | -3.020 | 0.00 | 0.00 | H |
| ATOM | 2137 | HB   | VAL | 136 | 3.910  | 6.327  | -3.465 | 0.00 | 0.00 | H |
| ATOM | 2138 | 1HG1 | VAL | 136 | 4.605  | 3.987  | -2.866 | 0.00 | 0.00 | H |
| ATOM | 2139 | 2HG1 | VAL | 136 | 3.430  | 3.198  | -3.942 | 0.00 | 0.00 | H |
| ATOM | 2140 | 3HG1 | VAL | 136 | 4.618  | 4.076  | -4.675 | 0.00 | 0.00 | H |
| ATOM | 2141 | 1HG2 | VAL | 136 | 2.071  | 5.065  | -5.504 | 0.00 | 0.00 | H |
| ATOM | 2142 | 2HG2 | VAL | 136 | 2.138  | 6.823  | -5.215 | 0.00 | 0.00 | H |
| ATOM | 2143 | 3HG2 | VAL | 136 | 3.536  | 5.910  | -5.906 | 0.00 | 0.00 | H |
| ATOM | 2144 | N    | ALA | 137 | 3.002  | 5.743  | -0.385 | 0.00 | 0.00 | N |
| ATOM | 2145 | CA   | ALA | 137 | 3.310  | 5.262  | 0.990  | 0.00 | 0.00 | C |
| ATOM | 2146 | C    | ALA | 137 | 2.138  | 4.613  | 1.745  | 0.00 | 0.00 | C |
| ATOM | 2147 | O    | ALA | 137 | 2.372  | 3.600  | 2.462  | 0.00 | 0.00 | O |
| ATOM | 2148 | CB   | ALA | 137 | 3.890  | 6.457  | 1.680  | 0.00 | 0.00 | C |
| ATOM | 2149 | H    | ALA | 137 | 3.402  | 6.639  | -0.620 | 0.00 | 0.00 | H |
| ATOM | 2150 | HA   | ALA | 137 | 4.119  | 4.541  | 0.873  | 0.00 | 0.00 | H |
| ATOM | 2151 | HB1  | ALA | 137 | 3.055  | 7.109  | 1.938  | 0.00 | 0.00 | H |
| ATOM | 2152 | HB2  | ALA | 137 | 4.311  | 6.085  | 2.613  | 0.00 | 0.00 | H |
| ATOM | 2153 | HB3  | ALA | 137 | 4.767  | 6.912  | 1.218  | 0.00 | 0.00 | H |
| ATOM | 2154 | N    | LEU | 138 | 0.896  | 4.988  | 1.482  | 0.00 | 0.00 | N |
| ATOM | 2155 | CA   | LEU | 138 | -0.219 | 4.342  | 2.125  | 0.00 | 0.00 | C |
| ATOM | 2156 | C    | LEU | 138 | -0.405 | 2.892  | 1.714  | 0.00 | 0.00 | C |
| ATOM | 2157 | O    | LEU | 138 | -0.823 | 2.088  | 2.534  | 0.00 | 0.00 | O |
| ATOM | 2158 | CB   | LEU | 138 | -1.454 | 5.194  | 2.043  | 0.00 | 0.00 | C |
| ATOM | 2159 | CG   | LEU | 138 | -2.581 | 4.911  | 3.042  | 0.00 | 0.00 | C |
| ATOM | 2160 | CD1  | LEU | 138 | -2.184 | 4.964  | 4.523  | 0.00 | 0.00 | C |
| ATOM | 2161 | CD2  | LEU | 138 | -3.709 | 5.894  | 2.900  | 0.00 | 0.00 | C |
| ATOM | 2162 | H    | LEU | 138 | 0.614  | 5.760  | 0.894  | 0.00 | 0.00 | H |
| ATOM | 2163 | HA   | LEU | 138 | 0.036  | 4.253  | 3.181  | 0.00 | 0.00 | H |
| ATOM | 2164 | HB2  | LEU | 138 | -1.228 | 6.237  | 2.256  | 0.00 | 0.00 | H |
| ATOM | 2165 | HB3  | LEU | 138 | -1.716 | 5.096  | 0.988  | 0.00 | 0.00 | H |
| ATOM | 2166 | HG   | LEU | 138 | -2.893 | 3.917  | 2.725  | 0.00 | 0.00 | H |
| ATOM | 2167 | 1HD1 | LEU | 138 | -1.735 | 5.950  | 4.637  | 0.00 | 0.00 | H |
| ATOM | 2168 | 2HD1 | LEU | 138 | -3.010 | 4.792  | 5.213  | 0.00 | 0.00 | H |
| ATOM | 2169 | 3HD1 | LEU | 138 | -1.515 | 4.113  | 4.663  | 0.00 | 0.00 | H |
| ATOM | 2170 | 1HD2 | LEU | 138 | -4.598 | 5.565  | 3.438  | 0.00 | 0.00 | H |
| ATOM | 2171 | 2HD2 | LEU | 138 | -3.430 | 6.903  | 3.205  | 0.00 | 0.00 | H |
| ATOM | 2172 | 3HD2 | LEU | 138 | -3.994 | 6.042  | 1.858  | 0.00 | 0.00 | H |
| ATOM | 2173 | N    | LEU | 139 | -0.134 | 2.556  | 0.461  | 0.00 | 0.00 | N |
| ATOM | 2174 | CA   | LEU | 139 | -0.125 | 1.163  | -0.005 | 0.00 | 0.00 | C |
| ATOM | 2175 | C    | LEU | 139 | 1.098  | 0.411  | 0.674  | 0.00 | 0.00 | C |
| ATOM | 2176 | O    | LEU | 139 | 0.893  | -0.699 | 1.168  | 0.00 | 0.00 | O |
| ATOM | 2177 | CB   | LEU | 139 | -0.003 | 1.038  | -1.514 | 0.00 | 0.00 | C |
| ATOM | 2178 | CG   | LEU | 139 | -1.093 | 1.489  | -2.476 | 0.00 | 0.00 | C |

|      |      |      |     |     |        |        |        |      |      |   |
|------|------|------|-----|-----|--------|--------|--------|------|------|---|
| ATOM | 2179 | CD1  | LEU | 139 | -0.905 | 0.882  | -3.811 | 0.00 | 0.00 | C |
| ATOM | 2180 | CD2  | LEU | 139 | -2.543 | 1.294  | -1.904 | 0.00 | 0.00 | C |
| ATOM | 2181 | H    | LEU | 139 | 0.193  | 3.244  | -0.203 | 0.00 | 0.00 | H |
| ATOM | 2182 | HA   | LEU | 139 | -1.014 | 0.623  | 0.317  | 0.00 | 0.00 | H |
| ATOM | 2183 | HB2  | LEU | 139 | 0.923  | 1.536  | -1.803 | 0.00 | 0.00 | H |
| ATOM | 2184 | HB3  | LEU | 139 | 0.263  | -0.013 | -1.634 | 0.00 | 0.00 | H |
| ATOM | 2185 | HG   | LEU | 139 | -1.012 | 2.573  | -2.559 | 0.00 | 0.00 | H |
| ATOM | 2186 | 1HD1 | LEU | 139 | -0.720 | -0.184 | -3.685 | 0.00 | 0.00 | H |
| ATOM | 2187 | 2HD1 | LEU | 139 | -1.833 | 0.965  | -4.378 | 0.00 | 0.00 | H |
| ATOM | 2188 | 3HD1 | LEU | 139 | -0.131 | 1.466  | -4.309 | 0.00 | 0.00 | H |
| ATOM | 2189 | 1HD2 | LEU | 139 | -2.756 | 0.225  | -1.884 | 0.00 | 0.00 | H |
| ATOM | 2190 | 2HD2 | LEU | 139 | -2.671 | 1.780  | -0.937 | 0.00 | 0.00 | H |
| ATOM | 2191 | 3HD2 | LEU | 139 | -3.216 | 1.740  | -2.636 | 0.00 | 0.00 | H |
| ATOM | 2192 | N    | GLY | 140 | 2.259  | 1.013  | 0.731  | 0.00 | 0.00 | N |
| ATOM | 2193 | CA   | GLY | 140 | 3.403  | 0.338  | 1.383  | 0.00 | 0.00 | C |
| ATOM | 2194 | C    | GLY | 140 | 3.336  | 0.063  | 2.928  | 0.00 | 0.00 | C |
| ATOM | 2195 | O    | GLY | 140 | 3.931  | -0.859 | 3.511  | 0.00 | 0.00 | O |
| ATOM | 2196 | H    | GLY | 140 | 2.265  | 1.982  | 0.444  | 0.00 | 0.00 | H |
| ATOM | 2197 | HA2  | GLY | 140 | 3.457  | -0.698 | 1.049  | 0.00 | 0.00 | H |
| ATOM | 2198 | HA3  | GLY | 140 | 4.369  | 0.816  | 1.216  | 0.00 | 0.00 | H |
| ATOM | 2199 | N    | PHE | 141 | 2.604  | 0.930  | 3.630  | 0.00 | 0.00 | N |
| ATOM | 2200 | CA   | PHE | 141 | 2.068  | 0.677  | 5.001  | 0.00 | 0.00 | C |
| ATOM | 2201 | C    | PHE | 141 | 1.009  | -0.364 | 4.990  | 0.00 | 0.00 | C |
| ATOM | 2202 | O    | PHE | 141 | 0.890  | -1.187 | 5.928  | 0.00 | 0.00 | O |
| ATOM | 2203 | CB   | PHE | 141 | 1.589  | 2.015  | 5.561  | 0.00 | 0.00 | C |
| ATOM | 2204 | CG   | PHE | 141 | 1.012  | 1.917  | 6.948  | 0.00 | 0.00 | C |
| ATOM | 2205 | CD1  | PHE | 141 | 1.765  | 1.379  | 8.006  | 0.00 | 0.00 | C |
| ATOM | 2206 | CD2  | PHE | 141 | -0.319 | 2.312  | 7.254  | 0.00 | 0.00 | C |
| ATOM | 2207 | CE1  | PHE | 141 | 1.265  | 1.261  | 9.294  | 0.00 | 0.00 | C |
| ATOM | 2208 | CE2  | PHE | 141 | -0.868 | 2.163  | 8.585  | 0.00 | 0.00 | C |
| ATOM | 2209 | CZ   | PHE | 141 | -0.056 | 1.580  | 9.579  | 0.00 | 0.00 | C |
| ATOM | 2210 | H    | PHE | 141 | 2.315  | 1.771  | 3.155  | 0.00 | 0.00 | H |
| ATOM | 2211 | HA   | PHE | 141 | 2.926  | 0.249  | 5.518  | 0.00 | 0.00 | H |
| ATOM | 2212 | HB2  | PHE | 141 | 2.444  | 2.684  | 5.649  | 0.00 | 0.00 | H |
| ATOM | 2213 | HB3  | PHE | 141 | 0.877  | 2.539  | 4.923  | 0.00 | 0.00 | H |
| ATOM | 2214 | HD1  | PHE | 141 | 2.807  | 1.196  | 7.790  | 0.00 | 0.00 | H |
| ATOM | 2215 | HD2  | PHE | 141 | -0.924 | 2.757  | 6.477  | 0.00 | 0.00 | H |
| ATOM | 2216 | HE1  | PHE | 141 | 1.847  | 0.820  | 10.091 | 0.00 | 0.00 | H |
| ATOM | 2217 | HE2  | PHE | 141 | -1.902 | 2.427  | 8.750  | 0.00 | 0.00 | H |
| ATOM | 2218 | HZ   | PHE | 141 | -0.523 | 1.297  | 10.511 | 0.00 | 0.00 | H |
| ATOM | 2219 | N    | GLY | 142 | 0.146  | -0.368 | 3.946  | 0.00 | 0.00 | N |
| ATOM | 2220 | CA   | GLY | 142 | -1.021 | -1.179 | 3.711  | 0.00 | 0.00 | C |
| ATOM | 2221 | C    | GLY | 142 | -0.645 | -2.627 | 3.664  | 0.00 | 0.00 | C |
| ATOM | 2222 | O    | GLY | 142 | -1.159 | -3.449 | 4.406  | 0.00 | 0.00 | O |
| ATOM | 2223 | H    | GLY | 142 | 0.357  | 0.225  | 3.157  | 0.00 | 0.00 | H |
| ATOM | 2224 | HA2  | GLY | 142 | -1.852 | -1.088 | 4.413  | 0.00 | 0.00 | H |
| ATOM | 2225 | HA3  | GLY | 142 | -1.381 | -0.840 | 2.739  | 0.00 | 0.00 | H |
| ATOM | 2226 | N    | TYR | 143 | 0.262  | -2.992 | 2.793  | 0.00 | 0.00 | N |
| ATOM | 2227 | CA   | TYR | 143 | 0.864  | -4.364 | 2.718  | 0.00 | 0.00 | C |
| ATOM | 2228 | C    | TYR | 143 | 1.390  | -4.902 | 4.061  | 0.00 | 0.00 | C |
| ATOM | 2229 | O    | TYR | 143 | 1.090  | -6.000 | 4.498  | 0.00 | 0.00 | O |
| ATOM | 2230 | CB   | TYR | 143 | 1.985  | -4.317 | 1.730  | 0.00 | 0.00 | C |
| ATOM | 2231 | CG   | TYR | 143 | 2.907  | -5.532 | 1.679  | 0.00 | 0.00 | C |
| ATOM | 2232 | CD1  | TYR | 143 | 2.346  | -6.783 | 1.347  | 0.00 | 0.00 | C |
| ATOM | 2233 | CD2  | TYR | 143 | 4.318  | -5.375 | 1.817  | 0.00 | 0.00 | C |
| ATOM | 2234 | CE1  | TYR | 143 | 3.196  | -7.871 | 1.248  | 0.00 | 0.00 | C |
| ATOM | 2235 | CE2  | TYR | 143 | 5.142  | -6.510 | 1.737  | 0.00 | 0.00 | C |
| ATOM | 2236 | CZ   | TYR | 143 | 4.587  | -7.738 | 1.453  | 0.00 | 0.00 | C |
| ATOM | 2237 | OH   | TYR | 143 | 5.418  | -8.792 | 1.177  | 0.00 | 0.00 | O |
| ATOM | 2238 | H    | TYR | 143 | 0.758  | -2.321 | 2.223  | 0.00 | 0.00 | H |
| ATOM | 2239 | HA   | TYR | 143 | 0.163  | -5.091 | 2.308  | 0.00 | 0.00 | H |
| ATOM | 2240 | HB2  | TYR | 143 | 1.537  | -4.278 | 0.738  | 0.00 | 0.00 | H |
| ATOM | 2241 | HB3  | TYR | 143 | 2.575  | -3.406 | 1.830  | 0.00 | 0.00 | H |
| ATOM | 2242 | HD1  | TYR | 143 | 1.279  | -6.944 | 1.316  | 0.00 | 0.00 | H |
| ATOM | 2243 | HD2  | TYR | 143 | 4.713  | -4.370 | 1.857  | 0.00 | 0.00 | H |
| ATOM | 2244 | HE1  | TYR | 143 | 2.866  | -8.892 | 1.118  | 0.00 | 0.00 | H |
| ATOM | 2245 | HE2  | TYR | 143 | 6.220  | -6.543 | 1.814  | 0.00 | 0.00 | H |
| ATOM | 2246 | HH   | TYR | 143 | 6.314  | -8.609 | 1.467  | 0.00 | 0.00 | H |
| ATOM | 2247 | N    | ARG | 144 | 2.017  | -4.044 | 4.917  | 0.00 | 0.00 | N |
| ATOM | 2248 | CA   | ARG | 144 | 2.440  | -4.521 | 6.211  | 0.00 | 0.00 | C |
| ATOM | 2249 | C    | ARG | 144 | 1.264  | -4.703 | 7.139  | 0.00 | 0.00 | C |
| ATOM | 2250 | O    | ARG | 144 | 1.362  | -5.721 | 7.796  | 0.00 | 0.00 | O |
| ATOM | 2251 | CB   | ARG | 144 | 3.510  | -3.691 | 6.863  | 0.00 | 0.00 | C |
| ATOM | 2252 | CG   | ARG | 144 | 4.927  | -3.821 | 6.275  | 0.00 | 0.00 | C |
| ATOM | 2253 | CD   | ARG | 144 | 5.412  | -5.306 | 6.086  | 0.00 | 0.00 | C |
| ATOM | 2254 | NE   | ARG | 144 | 6.897  | -5.344 | 5.820  | 0.00 | 0.00 | N |
| ATOM | 2255 | CZ   | ARG | 144 | 7.483  | -6.044 | 4.875  | 0.00 | 0.00 | C |
| ATOM | 2256 | NH1  | ARG | 144 | 6.903  | -6.961 | 4.209  | 0.00 | 0.00 | N |
| ATOM | 2257 | NH2  | ARG | 144 | 8.766  | -5.886 | 4.678  | 0.00 | 0.00 | N |
| ATOM | 2258 | H    | ARG | 144 | 2.081  | -3.047 | 4.769  | 0.00 | 0.00 | H |
| ATOM | 2259 | HA   | ARG | 144 | 2.782  | -5.528 | 5.972  | 0.00 | 0.00 | H |
| ATOM | 2260 | HB2  | ARG | 144 | 3.213  | -2.642 | 6.823  | 0.00 | 0.00 | H |
| ATOM | 2261 | HB3  | ARG | 144 | 3.498  | -4.078 | 7.882  | 0.00 | 0.00 | H |
| ATOM | 2262 | HG2  | ARG | 144 | 4.874  | -3.384 | 5.277  | 0.00 | 0.00 | H |
| ATOM | 2263 | HG3  | ARG | 144 | 5.579  | -3.206 | 6.894  | 0.00 | 0.00 | H |
| ATOM | 2264 | HD2  | ARG | 144 | 5.174  | -5.978 | 6.910  | 0.00 | 0.00 | H |
| ATOM | 2265 | HD3  | ARG | 144 | 4.920  | -5.655 | 5.178  | 0.00 | 0.00 | H |
| ATOM | 2266 | HE   | ARG | 144 | 7.471  | -4.622 | 6.231  | 0.00 | 0.00 | H |
| ATOM | 2267 | 1HH1 | ARG | 144 | 5.903  | -7.030 | 4.333  | 0.00 | 0.00 | H |
| ATOM | 2268 | 2HH1 | ARG | 144 | 7.468  | -7.467 | 3.542  | 0.00 | 0.00 | H |
| ATOM | 2269 | 1HH2 | ARG | 144 | 9.170  | -5.109 | 5.182  | 0.00 | 0.00 | H |
| ATOM | 2270 | 2HH2 | ARG | 144 | 9.317  | -6.416 | 4.019  | 0.00 | 0.00 | H |
| ATOM | 2271 | N    | LEU | 145 | 0.312  | -3.791 | 7.213  | 0.00 | 0.00 | N |
| ATOM | 2272 | CA   | LEU | 145 | -0.878 | -3.869 | 8.007  | 0.00 | 0.00 | C |
| ATOM | 2273 | C    | LEU | 145 | -1.695 | -5.106 | 7.702  | 0.00 | 0.00 | C |
| ATOM | 2274 | O    | LEU | 145 | -2.295 | -5.665 | 8.556  | 0.00 | 0.00 | O |
| ATOM | 2275 | CB   | LEU | 145 | -1.623 | -2.463 | 7.902  | 0.00 | 0.00 | C |
| ATOM | 2276 | CG   | LEU | 145 | -2.706 | -2.291 | 8.995  | 0.00 | 0.00 | C |
| ATOM | 2277 | CD1  | LEU | 145 | -2.242 | -2.611 | 10.394 | 0.00 | 0.00 | C |
| ATOM | 2278 | CD2  | LEU | 145 | -3.266 | -0.832 | 8.968  | 0.00 | 0.00 | C |
| ATOM | 2279 | H    | LEU | 145 | 0.427  | -2.912 | 6.731  | 0.00 | 0.00 | H |
| ATOM | 2280 | HA   | LEU | 145 | -0.526 | -3.907 | 9.037  | 0.00 | 0.00 | H |
| ATOM | 2281 | HB2  | LEU | 145 | -0.849 | -1.699 | 7.971  | 0.00 | 0.00 | H |
| ATOM | 2282 | HB3  | LEU | 145 | -2.108 | -2.432 | 6.927  | 0.00 | 0.00 | H |
| ATOM | 2283 | HG   | LEU | 145 | -3.581 | -2.879 | 8.718  | 0.00 | 0.00 | H |



|      |      |      |     |     |        |         |        |      |      |   |
|------|------|------|-----|-----|--------|---------|--------|------|------|---|
| ATOM | 2284 | 1HD1 | LEU | 145 | -1.222 | -2.245  | 10.516 | 0.00 | 0.00 | H |
| ATOM | 2285 | 2HD1 | LEU | 145 | -2.906 | -2.095  | 11.085 | 0.00 | 0.00 | H |
| ATOM | 2286 | 3HD1 | LEU | 145 | -2.238 | -3.696  | 10.492 | 0.00 | 0.00 | H |
| ATOM | 2287 | 1HD2 | LEU | 145 | -2.441 | -0.173  | 9.248  | 0.00 | 0.00 | H |
| ATOM | 2288 | 2HD2 | LEU | 145 | -3.725 | -0.648  | 7.996  | 0.00 | 0.00 | H |
| ATOM | 2289 | 3HD2 | LEU | 145 | -4.024 | -0.621  | 9.721  | 0.00 | 0.00 | H |
| ATOM | 2290 | N    | ALA | 146 | -1.693 | -5.500  | 6.416  | 0.00 | 0.00 | N |
| ATOM | 2291 | CA   | ALA | 146 | -2.428 | -6.632  | 5.897  | 0.00 | 0.00 | C |
| ATOM | 2292 | C    | ALA | 146 | -1.828 | -8.023  | 6.388  | 0.00 | 0.00 | C |
| ATOM | 2293 | O    | ALA | 146 | -2.528 | -8.789  | 7.005  | 0.00 | 0.00 | O |
| ATOM | 2294 | CB   | ALA | 146 | -2.561 | -6.486  | 4.441  | 0.00 | 0.00 | C |
| ATOM | 2295 | H    | ALA | 146 | -1.112 | -4.960  | 5.791  | 0.00 | 0.00 | H |
| ATOM | 2296 | HA   | ALA | 146 | -3.431 | -6.588  | 6.321  | 0.00 | 0.00 | H |
| ATOM | 2297 | HB1  | ALA | 146 | -3.173 | -5.619  | 4.191  | 0.00 | 0.00 | H |
| ATOM | 2298 | HB2  | ALA | 146 | -1.562 | -6.352  | 4.027  | 0.00 | 0.00 | H |
| ATOM | 2299 | HB3  | ALA | 146 | -3.091 | -7.409  | 4.202  | 0.00 | 0.00 | H |
| ATOM | 2300 | N    | LEU | 147 | -0.463 | -8.153  | 6.453  | 0.00 | 0.00 | N |
| ATOM | 2301 | CA   | LEU | 147 | 0.254  | -9.277  | 7.066  | 0.00 | 0.00 | C |
| ATOM | 2302 | C    | LEU | 147 | 0.183  | -9.243  | 8.631  | 0.00 | 0.00 | C |
| ATOM | 2303 | O    | LEU | 147 | 0.231  | -10.264 | 9.357  | 0.00 | 0.00 | O |
| ATOM | 2304 | CB   | LEU | 147 | 1.710  | -9.288  | 6.542  | 0.00 | 0.00 | C |
| ATOM | 2305 | CG   | LEU | 147 | 1.948  | -10.184 | 5.264  | 0.00 | 0.00 | C |
| ATOM | 2306 | CD1  | LEU | 147 | 1.210  | -9.851  | 3.954  | 0.00 | 0.00 | C |
| ATOM | 2307 | CD2  | LEU | 147 | 3.382  | -9.917  | 4.860  | 0.00 | 0.00 | C |
| ATOM | 2308 | H    | LEU | 147 | 0.087  | -7.534  | 5.876  | 0.00 | 0.00 | H |
| ATOM | 2309 | HA   | LEU | 147 | -0.150 | -10.257 | 6.810  | 0.00 | 0.00 | H |
| ATOM | 2310 | HB2  | LEU | 147 | 2.044  | -8.281  | 6.291  | 0.00 | 0.00 | H |
| ATOM | 2311 | HB3  | LEU | 147 | 2.379  | -9.554  | 7.359  | 0.00 | 0.00 | H |
| ATOM | 2312 | HG   | LEU | 147 | 1.785  | -11.229 | 5.531  | 0.00 | 0.00 | H |
| ATOM | 2313 | 1HD1 | LEU | 147 | 1.527  | -8.852  | 3.652  | 0.00 | 0.00 | H |
| ATOM | 2314 | 2HD1 | LEU | 147 | 0.123  | -9.811  | 3.999  | 0.00 | 0.00 | H |
| ATOM | 2315 | 3HD1 | LEU | 147 | 1.375  | -10.627 | 3.207  | 0.00 | 0.00 | H |
| ATOM | 2316 | 1HD2 | LEU | 147 | 3.608  | -8.863  | 4.696  | 0.00 | 0.00 | H |
| ATOM | 2317 | 2HD2 | LEU | 147 | 4.024  | -10.400 | 5.596  | 0.00 | 0.00 | H |
| ATOM | 2318 | 3HD2 | LEU | 147 | 3.487  | -10.449 | 3.914  | 0.00 | 0.00 | H |
| ATOM | 2319 | N    | HIP | 148 | 0.064  | -8.028  | 9.189  | 0.00 | 0.00 | N |
| ATOM | 2320 | CA   | HIP | 148 | -0.036 | -7.817  | 10.699 | 0.00 | 0.00 | C |
| ATOM | 2321 | C    | HIP | 148 | -1.447 | -8.193  | 11.256 | 0.00 | 0.00 | C |
| ATOM | 2322 | O    | HIP | 148 | -1.561 | -8.578  | 12.416 | 0.00 | 0.00 | O |
| ATOM | 2323 | CB   | HIP | 148 | 0.341  | -6.364  | 11.025 | 0.00 | 0.00 | C |
| ATOM | 2324 | CG   | HIP | 148 | 0.657  | -6.130  | 12.520 | 0.00 | 0.00 | C |
| ATOM | 2325 | CD2  | HIP | 148 | -0.331 | -5.731  | 13.400 | 0.00 | 0.00 | C |
| ATOM | 2326 | ND1  | HIP | 148 | 1.876  | -6.084  | 13.204 | 0.00 | 0.00 | N |
| ATOM | 2327 | CE1  | HIP | 148 | 1.680  | -5.549  | 14.364 | 0.00 | 0.00 | C |
| ATOM | 2328 | NE2  | HIP | 148 | 0.348  | -5.504  | 14.578 | 0.00 | 0.00 | N |
| ATOM | 2329 | H    | HIP | 148 | 0.069  | -7.174  | 8.651  | 0.00 | 0.00 | H |
| ATOM | 2330 | HA   | HIP | 148 | 0.636  | -8.576  | 11.100 | 0.00 | 0.00 | H |
| ATOM | 2331 | HB2  | HIP | 148 | 1.235  | -6.169  | 10.430 | 0.00 | 0.00 | H |
| ATOM | 2332 | HB3  | HIP | 148 | -0.465 | -5.757  | 10.614 | 0.00 | 0.00 | H |
| ATOM | 2333 | HD1  | HIP | 148 | 2.781  | -6.374  | 12.861 | 0.00 | 0.00 | H |
| ATOM | 2334 | HD2  | HIP | 148 | -1.389 | -5.704  | 13.189 | 0.00 | 0.00 | H |
| ATOM | 2335 | HE1  | HIP | 148 | 2.496  | -5.307  | 15.029 | 0.00 | 0.00 | H |
| ATOM | 2336 | HE2  | HIP | 148 | -0.108 | -5.304  | 15.457 | 0.00 | 0.00 | H |
| ATOM | 2337 | N    | VAL | 149 | -2.485 | -8.211  | 10.457 | 0.00 | 0.00 | N |
| ATOM | 2338 | CA   | VAL | 149 | -3.766 | -8.892  | 10.612 | 0.00 | 0.00 | C |
| ATOM | 2339 | C    | VAL | 149 | -3.745 | -10.371 | 10.292 | 0.00 | 0.00 | C |
| ATOM | 2340 | O    | VAL | 149 | -4.140 | -11.234 | 11.077 | 0.00 | 0.00 | O |
| ATOM | 2341 | CB   | VAL | 149 | -4.868 | -8.190  | 9.705  | 0.00 | 0.00 | C |
| ATOM | 2342 | CG1  | VAL | 149 | -6.257 | -8.950  | 9.827  | 0.00 | 0.00 | C |
| ATOM | 2343 | CG2  | VAL | 149 | -5.127 | -6.769  | 10.239 | 0.00 | 0.00 | C |
| ATOM | 2344 | H    | VAL | 149 | -2.278 | -7.851  | 9.537  | 0.00 | 0.00 | H |
| ATOM | 2345 | HA   | VAL | 149 | -3.980 | -8.858  | 11.680 | 0.00 | 0.00 | H |
| ATOM | 2346 | HB   | VAL | 149 | -4.583 | -8.180  | 8.652  | 0.00 | 0.00 | H |
| ATOM | 2347 | 1HG1 | VAL | 149 | -7.090 | -8.495  | 9.289  | 0.00 | 0.00 | H |
| ATOM | 2348 | 2HG1 | VAL | 149 | -6.121 | -9.961  | 9.444  | 0.00 | 0.00 | H |
| ATOM | 2349 | 3HG1 | VAL | 149 | -6.505 | -8.935  | 10.888 | 0.00 | 0.00 | H |
| ATOM | 2350 | 1HG2 | VAL | 149 | -5.822 | -6.376  | 9.495  | 0.00 | 0.00 | H |
| ATOM | 2351 | 2HG2 | VAL | 149 | -5.644 | -6.750  | 11.198 | 0.00 | 0.00 | H |
| ATOM | 2352 | 3HG2 | VAL | 149 | -4.175 | -6.240  | 10.199 | 0.00 | 0.00 | H |
| ATOM | 2353 | N    | TYR | 150 | -3.133 | -10.745 | 9.145  | 0.00 | 0.00 | N |
| ATOM | 2354 | CA   | TYR | 150 | -2.957 | -12.142 | 8.778  | 0.00 | 0.00 | C |
| ATOM | 2355 | C    | TYR | 150 | -2.169 | -12.974 | 9.804  | 0.00 | 0.00 | C |
| ATOM | 2356 | O    | TYR | 150 | -2.625 | -14.057 | 10.172 | 0.00 | 0.00 | O |
| ATOM | 2357 | CB   | TYR | 150 | -2.133 | -12.319 | 7.495  | 0.00 | 0.00 | C |
| ATOM | 2358 | CG   | TYR | 150 | -2.214 | -13.639 | 6.795  | 0.00 | 0.00 | C |
| ATOM | 2359 | CD1  | TYR | 150 | -1.391 | -14.714 | 7.141  | 0.00 | 0.00 | C |
| ATOM | 2360 | CD2  | TYR | 150 | -3.072 | -13.793 | 5.704  | 0.00 | 0.00 | C |
| ATOM | 2361 | CE1  | TYR | 150 | -1.378 | -15.958 | 6.530  | 0.00 | 0.00 | C |
| ATOM | 2362 | CE2  | TYR | 150 | -3.146 | -15.064 | 5.059  | 0.00 | 0.00 | C |
| ATOM | 2363 | CZ   | TYR | 150 | -2.289 | -16.162 | 5.450  | 0.00 | 0.00 | C |
| ATOM | 2364 | OH   | TYR | 150 | -2.453 | -17.400 | 4.842  | 0.00 | 0.00 | O |
| ATOM | 2365 | H    | TYR | 150 | -2.743 | -10.077 | 8.495  | 0.00 | 0.00 | H |
| ATOM | 2366 | HA   | TYR | 150 | -3.913 | -12.653 | 8.666  | 0.00 | 0.00 | H |
| ATOM | 2367 | HB2  | TYR | 150 | -2.506 | -11.547 | 6.822  | 0.00 | 0.00 | H |
| ATOM | 2368 | HB3  | TYR | 150 | -1.070 | -12.225 | 7.719  | 0.00 | 0.00 | H |
| ATOM | 2369 | HD1  | TYR | 150 | -0.622 | -14.539 | 7.880  | 0.00 | 0.00 | H |
| ATOM | 2370 | HD2  | TYR | 150 | -3.730 | -12.997 | 5.385  | 0.00 | 0.00 | H |
| ATOM | 2371 | HE1  | TYR | 150 | -0.674 | -16.659 | 6.955  | 0.00 | 0.00 | H |
| ATOM | 2372 | HE2  | TYR | 150 | -3.926 | -15.288 | 4.346  | 0.00 | 0.00 | H |
| ATOM | 2373 | HH   | TYR | 150 | -1.885 | -18.011 | 5.318  | 0.00 | 0.00 | H |
| ATOM | 2374 | N    | GLN | 151 | -1.207 | -12.350 | 10.377 | 0.00 | 0.00 | N |
| ATOM | 2375 | CA   | GLN | 151 | -0.327 | -13.079 | 11.332 | 0.00 | 0.00 | C |
| ATOM | 2376 | C    | GLN | 151 | -0.888 | -13.331 | 12.761 | 0.00 | 0.00 | C |
| ATOM | 2377 | O    | GLN | 151 | -0.244 | -14.069 | 13.522 | 0.00 | 0.00 | O |
| ATOM | 2378 | CB   | GLN | 151 | 1.125  | -12.511 | 11.408 | 0.00 | 0.00 | C |
| ATOM | 2379 | CG   | GLN | 151 | 1.859  | -12.686 | 10.098 | 0.00 | 0.00 | C |
| ATOM | 2380 | CD   | GLN | 151 | 3.104  | -11.837 | 9.935  | 0.00 | 0.00 | C |
| ATOM | 2381 | NE2  | GLN | 151 | 3.733  | -11.849 | 8.724  | 0.00 | 0.00 | N |
| ATOM | 2382 | OE1  | GLN | 151 | 3.610  | -11.242 | 10.838 | 0.00 | 0.00 | O |
| ATOM | 2383 | H    | GLN | 151 | -0.966 | -11.452 | 9.983  | 0.00 | 0.00 | H |
| ATOM | 2384 | HA   | GLN | 151 | -0.181 | -14.060 | 10.882 | 0.00 | 0.00 | H |
| ATOM | 2385 | HB2  | GLN | 151 | 1.002  | -11.442 | 11.583 | 0.00 | 0.00 | H |
| ATOM | 2386 | HB3  | GLN | 151 | 1.752  | -13.025 | 12.136 | 0.00 | 0.00 | H |
| ATOM | 2387 | HG2  | GLN | 151 | 2.139  | -13.721 | 9.901  | 0.00 | 0.00 | H |
| ATOM | 2388 | HG3  | GLN | 151 | 1.247  | -12.380 | 9.252  | 0.00 | 0.00 | H |

|      |      |      |     |     |         |         |        |      |      |   |
|------|------|------|-----|-----|---------|---------|--------|------|------|---|
| ATOM | 2389 | 1HE2 | GLN | 151 | 4.455   | -11.154 | 8.596  | 0.00 | 0.00 | H |
| ATOM | 2390 | 2HE2 | GLN | 151 | 3.255   | -12.306 | 7.961  | 0.00 | 0.00 | H |
| ATOM | 2391 | N    | HIP | 152 | -2.163  | -12.844 | 12.978 | 0.00 | 0.00 | N |
| ATOM | 2392 | CA   | HIP | 152 | -2.977  | -13.197 | 14.143 | 0.00 | 0.00 | C |
| ATOM | 2393 | C    | HIP | 152 | -4.225  | -14.058 | 13.977 | 0.00 | 0.00 | C |
| ATOM | 2394 | O    | HIP | 152 | -5.190  | -13.904 | 14.683 | 0.00 | 0.00 | O |
| ATOM | 2395 | CB   | HIP | 152 | -3.268  | -11.989 | 15.118 | 0.00 | 0.00 | C |
| ATOM | 2396 | CG   | HIP | 152 | -1.991  | -11.326 | 15.542 | 0.00 | 0.00 | C |
| ATOM | 2397 | CD2  | HIP | 152 | -1.555  | -10.182 | 15.065 | 0.00 | 0.00 | C |
| ATOM | 2398 | ND1  | HIP | 152 | -0.907  | -11.911 | 16.166 | 0.00 | 0.00 | N |
| ATOM | 2399 | CE1  | HIP | 152 | 0.118   | -11.064 | 16.247 | 0.00 | 0.00 | C |
| ATOM | 2400 | NE2  | HIP | 152 | -0.310  | -9.903  | 15.565 | 0.00 | 0.00 | N |
| ATOM | 2401 | H    | HIP | 152 | -2.629  | -12.299 | 12.267 | 0.00 | 0.00 | H |
| ATOM | 2402 | HA   | HIP | 152 | -2.265  | -13.788 | 14.717 | 0.00 | 0.00 | H |
| ATOM | 2403 | HB2  | HIP | 152 | -3.986  | -11.254 | 14.750 | 0.00 | 0.00 | H |
| ATOM | 2404 | HB3  | HIP | 152 | -3.752  | -12.303 | 16.042 | 0.00 | 0.00 | H |
| ATOM | 2405 | HD1  | HIP | 152 | -0.955  | -12.775 | 16.687 | 0.00 | 0.00 | H |
| ATOM | 2406 | HD2  | HIP | 152 | -2.147  | -9.533  | 14.437 | 0.00 | 0.00 | H |
| ATOM | 2407 | HE1  | HIP | 152 | 1.024   | -11.071 | 16.835 | 0.00 | 0.00 | H |
| ATOM | 2408 | HE2  | HIP | 152 | 0.186   | -9.026  | 15.495 | 0.00 | 0.00 | H |
| ATOM | 2409 | N    | GLY | 153 | -4.157  | -15.059 | 13.042 | 0.00 | 0.00 | N |
| ATOM | 2410 | CA   | GLY | 153 | -5.246  | -16.056 | 12.903 | 0.00 | 0.00 | C |
| ATOM | 2411 | C    | GLY | 153 | -6.432  | -15.680 | 12.051 | 0.00 | 0.00 | C |
| ATOM | 2412 | O    | GLY | 153 | -7.389  | -16.442 | 12.012 | 0.00 | 0.00 | O |
| ATOM | 2413 | H    | GLY | 153 | -3.322  | -15.318 | 12.538 | 0.00 | 0.00 | H |
| ATOM | 2414 | HA2  | GLY | 153 | -4.945  | -17.046 | 12.557 | 0.00 | 0.00 | H |
| ATOM | 2415 | HA3  | GLY | 153 | -5.685  | -16.294 | 13.873 | 0.00 | 0.00 | H |
| ATOM | 2416 | N    | LEU | 154 | -6.345  | -14.450 | 11.473 | 0.00 | 0.00 | N |
| ATOM | 2417 | CA   | LEU | 154 | -7.339  | -13.843 | 10.714 | 0.00 | 0.00 | C |
| ATOM | 2418 | C    | LEU | 154 | -6.856  | -13.900 | 9.252  | 0.00 | 0.00 | C |
| ATOM | 2419 | O    | LEU | 154 | -6.739  | -12.889 | 8.610  | 0.00 | 0.00 | O |
| ATOM | 2420 | CB   | LEU | 154 | -7.591  | -12.458 | 11.297 | 0.00 | 0.00 | C |
| ATOM | 2421 | CG   | LEU | 154 | -7.947  | -12.226 | 12.757 | 0.00 | 0.00 | C |
| ATOM | 2422 | CD1  | LEU | 154 | -7.465  | -10.772 | 13.178 | 0.00 | 0.00 | C |
| ATOM | 2423 | CD2  | LEU | 154 | -9.363  | -12.338 | 13.075 | 0.00 | 0.00 | C |
| ATOM | 2424 | H    | LEU | 154 | -5.558  | -13.859 | 11.694 | 0.00 | 0.00 | H |
| ATOM | 2425 | HA   | LEU | 154 | -8.351  | -14.234 | 10.823 | 0.00 | 0.00 | H |
| ATOM | 2426 | HB2  | LEU | 154 | -6.695  | -11.892 | 11.043 | 0.00 | 0.00 | H |
| ATOM | 2427 | HB3  | LEU | 154 | -8.338  | -11.953 | 10.686 | 0.00 | 0.00 | H |
| ATOM | 2428 | HG   | LEU | 154 | -7.363  | -12.934 | 13.346 | 0.00 | 0.00 | H |
| ATOM | 2429 | 1HD1 | LEU | 154 | -6.375  | -10.778 | 13.167 | 0.00 | 0.00 | H |
| ATOM | 2430 | 2HD1 | LEU | 154 | -7.799  | -10.035 | 12.445 | 0.00 | 0.00 | H |
| ATOM | 2431 | 3HD1 | LEU | 154 | -7.773  | -10.527 | 14.195 | 0.00 | 0.00 | H |
| ATOM | 2432 | 1HD2 | LEU | 154 | -9.946  | -11.663 | 12.449 | 0.00 | 0.00 | H |
| ATOM | 2433 | 2HD2 | LEU | 154 | -9.496  | -12.228 | 14.151 | 0.00 | 0.00 | H |
| ATOM | 2434 | 3HD2 | LEU | 154 | -9.715  | -13.363 | 12.969 | 0.00 | 0.00 | H |
| ATOM | 2435 | N    | THR | 155 | -6.637  | -15.176 | 8.769  | 0.00 | 0.00 | N |
| ATOM | 2436 | CA   | THR | 155 | -5.924  | -15.364 | 7.440  | 0.00 | 0.00 | C |
| ATOM | 2437 | C    | THR | 155 | -6.774  | -14.970 | 6.226  | 0.00 | 0.00 | C |
| ATOM | 2438 | O    | THR | 155 | -6.221  | -14.264 | 5.362  | 0.00 | 0.00 | O |
| ATOM | 2439 | CB   | THR | 155 | -5.483  | -16.822 | 7.406  | 0.00 | 0.00 | C |
| ATOM | 2440 | CG2  | THR | 155 | -4.376  | -17.106 | 8.452  | 0.00 | 0.00 | C |
| ATOM | 2441 | OG1  | THR | 155 | -6.526  | -17.760 | 7.663  | 0.00 | 0.00 | O |
| ATOM | 2442 | H    | THR | 155 | -6.737  | -15.941 | 9.421  | 0.00 | 0.00 | H |
| ATOM | 2443 | HA   | THR | 155 | -5.017  | -14.763 | 7.503  | 0.00 | 0.00 | H |
| ATOM | 2444 | HB   | THR | 155 | -5.154  | -17.059 | 6.394  | 0.00 | 0.00 | H |
| ATOM | 2445 | HG1  | THR | 155 | -6.135  | -18.511 | 8.114  | 0.00 | 0.00 | H |
| ATOM | 2446 | 1HG2 | THR | 155 | -3.699  | -16.252 | 8.484  | 0.00 | 0.00 | H |
| ATOM | 2447 | 2HG2 | THR | 155 | -4.685  | -17.176 | 9.495  | 0.00 | 0.00 | H |
| ATOM | 2448 | 3HG2 | THR | 155 | -3.762  | -17.966 | 8.186  | 0.00 | 0.00 | H |
| ATOM | 2449 | N    | GLY | 156 | -8.097  | -15.259 | 6.272  | 0.00 | 0.00 | N |
| ATOM | 2450 | CA   | GLY | 156 | -9.151  | -14.665 | 5.431  | 0.00 | 0.00 | C |
| ATOM | 2451 | C    | GLY | 156 | -9.185  | -13.156 | 5.443  | 0.00 | 0.00 | C |
| ATOM | 2452 | O    | GLY | 156 | -9.286  | -12.571 | 4.378  | 0.00 | 0.00 | O |
| ATOM | 2453 | H    | GLY | 156 | -8.372  | -15.516 | 7.208  | 0.00 | 0.00 | H |
| ATOM | 2454 | HA2  | GLY | 156 | -9.087  | -14.961 | 4.384  | 0.00 | 0.00 | H |
| ATOM | 2455 | HA3  | GLY | 156 | -10.126 | -14.883 | 5.867  | 0.00 | 0.00 | H |
| ATOM | 2456 | N    | PHE | 157 | -9.192  | -12.600 | 6.672  | 0.00 | 0.00 | N |
| ATOM | 2457 | CA   | PHE | 157 | -9.473  | -11.201 | 6.808  | 0.00 | 0.00 | C |
| ATOM | 2458 | C    | PHE | 157 | -8.420  | -10.194 | 6.278  | 0.00 | 0.00 | C |
| ATOM | 2459 | O    | PHE | 157 | -8.668  | -8.972  | 6.215  | 0.00 | 0.00 | O |
| ATOM | 2460 | CB   | PHE | 157 | -9.734  | -11.032 | 8.328  | 0.00 | 0.00 | C |
| ATOM | 2461 | CG   | PHE | 157 | -11.019 | -10.323 | 8.772  | 0.00 | 0.00 | C |
| ATOM | 2462 | CD1  | PHE | 157 | -10.928 | -8.913  | 9.035  | 0.00 | 0.00 | C |
| ATOM | 2463 | CD2  | PHE | 157 | -12.288 | -10.940 | 8.880  | 0.00 | 0.00 | C |
| ATOM | 2464 | CE1  | PHE | 157 | -12.097 | -8.204  | 9.192  | 0.00 | 0.00 | C |
| ATOM | 2465 | CE2  | PHE | 157 | -13.455 | -10.185 | 9.111  | 0.00 | 0.00 | C |
| ATOM | 2466 | CZ   | PHE | 157 | -13.388 | -8.779  | 9.288  | 0.00 | 0.00 | C |
| ATOM | 2467 | H    | PHE | 157 | -9.271  | -13.243 | 7.447  | 0.00 | 0.00 | H |
| ATOM | 2468 | HA   | PHE | 157 | -10.393 | -10.968 | 6.274  | 0.00 | 0.00 | H |
| ATOM | 2469 | HB2  | PHE | 157 | -9.682  | -12.009 | 8.809  | 0.00 | 0.00 | H |
| ATOM | 2470 | HB3  | PHE | 157 | -8.893  | -10.470 | 8.733  | 0.00 | 0.00 | H |
| ATOM | 2471 | HD1  | PHE | 157 | -10.021 | -8.384  | 8.786  | 0.00 | 0.00 | H |
| ATOM | 2472 | HD2  | PHE | 157 | -12.334 | -12.009 | 8.748  | 0.00 | 0.00 | H |
| ATOM | 2473 | HE1  | PHE | 157 | -12.100 | -7.129  | 9.306  | 0.00 | 0.00 | H |
| ATOM | 2474 | HE2  | PHE | 157 | -14.396 | -10.669 | 9.323  | 0.00 | 0.00 | H |
| ATOM | 2475 | HZ   | PHE | 157 | -14.194 | -8.088  | 9.488  | 0.00 | 0.00 | H |
| ATOM | 2476 | N    | LEU | 158 | -7.329  | -10.681 | 5.660  | 0.00 | 0.00 | N |
| ATOM | 2477 | CA   | LEU | 158 | -6.426  | -9.931  | 4.742  | 0.00 | 0.00 | C |
| ATOM | 2478 | C    | LEU | 158 | -7.217  | -9.280  | 3.549  | 0.00 | 0.00 | C |
| ATOM | 2479 | O    | LEU | 158 | -6.971  | -8.091  | 3.222  | 0.00 | 0.00 | O |
| ATOM | 2480 | CB   | LEU | 158 | -5.267  | -10.956 | 4.342  | 0.00 | 0.00 | C |
| ATOM | 2481 | CG   | LEU | 158 | -4.190  | -10.359 | 3.364  | 0.00 | 0.00 | C |
| ATOM | 2482 | CD1  | LEU | 158 | -2.784  | -10.797 | 3.643  | 0.00 | 0.00 | C |
| ATOM | 2483 | CD2  | LEU | 158 | -4.554  | -10.776 | 1.951  | 0.00 | 0.00 | C |
| ATOM | 2484 | H    | LEU | 158 | -7.202  | -11.680 | 5.742  | 0.00 | 0.00 | H |
| ATOM | 2485 | HA   | LEU | 158 | -5.889  | -9.151  | 5.279  | 0.00 | 0.00 | H |
| ATOM | 2486 | HB2  | LEU | 158 | -4.814  | -11.203 | 5.301  | 0.00 | 0.00 | H |
| ATOM | 2487 | HB3  | LEU | 158 | -5.738  | -11.825 | 3.881  | 0.00 | 0.00 | H |
| ATOM | 2488 | HG   | LEU | 158 | -4.120  | -9.273  | 3.299  | 0.00 | 0.00 | H |
| ATOM | 2489 | 1HD1 | LEU | 158 | -2.556  | -10.588 | 4.689  | 0.00 | 0.00 | H |
| ATOM | 2490 | 2HD1 | LEU | 158 | -2.695  | -11.879 | 3.539  | 0.00 | 0.00 | H |
| ATOM | 2491 | 3HD1 | LEU | 158 | -2.193  | -10.176 | 2.972  | 0.00 | 0.00 | H |
| ATOM | 2492 | 1HD2 | LEU | 158 | -5.489  | -10.279 | 1.692  | 0.00 | 0.00 | H |
| ATOM | 2493 | 2HD2 | LEU | 158 | -3.723  | -10.414 | 1.348  | 0.00 | 0.00 | H |

|      |      |      |     |     |         |         |        |      |      |   |
|------|------|------|-----|-----|---------|---------|--------|------|------|---|
| ATOM | 2494 | 3HD2 | LEU | 158 | -4.579  | -11.854 | 1.790  | 0.00 | 0.00 | H |
| ATOM | 2495 | N    | GLY | 159 | -8.262  | -9.980  | 3.008  | 0.00 | 0.00 | N |
| ATOM | 2496 | CA   | GLY | 159 | -9.118  | -9.461  | 1.973  | 0.00 | 0.00 | C |
| ATOM | 2497 | C    | GLY | 159 | -10.076 | -8.369  | 2.510  | 0.00 | 0.00 | C |
| ATOM | 2498 | O    | GLY | 159 | -10.321 | -7.396  | 1.751  | 0.00 | 0.00 | O |
| ATOM | 2499 | H    | GLY | 159 | -8.371  | -10.919 | 3.365  | 0.00 | 0.00 | H |
| ATOM | 2500 | HA2  | GLY | 159 | -8.467  | -9.169  | 1.152  | 0.00 | 0.00 | H |
| ATOM | 2501 | HA3  | GLY | 159 | -9.685  | -10.369 | 1.766  | 0.00 | 0.00 | H |
| ATOM | 2502 | N    | GLN | 160 | -10.529 | -8.392  | 3.723  | 0.00 | 0.00 | N |
| ATOM | 2503 | CA   | GLN | 160 | -11.337 | -7.249  | 4.328  | 0.00 | 0.00 | C |
| ATOM | 2504 | C    | GLN | 160 | -10.499 | -6.048  | 4.791  | 0.00 | 0.00 | C |
| ATOM | 2505 | O    | GLN | 160 | -10.956 | -4.901  | 4.726  | 0.00 | 0.00 | O |
| ATOM | 2506 | CB   | GLN | 160 | -12.250 | -7.740  | 5.503  | 0.00 | 0.00 | C |
| ATOM | 2507 | CG   | GLN | 160 | -13.373 | -8.832  | 5.262  | 0.00 | 0.00 | C |
| ATOM | 2508 | CD   | GLN | 160 | -14.653 | -8.206  | 4.720  | 0.00 | 0.00 | C |
| ATOM | 2509 | NE2  | GLN | 160 | -15.824 | -8.780  | 4.895  | 0.00 | 0.00 | N |
| ATOM | 2510 | OE1  | GLN | 160 | -14.692 | -7.074  | 4.248  | 0.00 | 0.00 | O |
| ATOM | 2511 | H    | GLN | 160 | -10.487 | -9.252  | 4.252  | 0.00 | 0.00 | H |
| ATOM | 2512 | HA   | GLN | 160 | -11.933 | -6.811  | 3.528  | 0.00 | 0.00 | H |
| ATOM | 2513 | HB2  | GLN | 160 | -11.639 | -8.176  | 6.294  | 0.00 | 0.00 | H |
| ATOM | 2514 | HB3  | GLN | 160 | -12.667 | -6.871  | 6.010  | 0.00 | 0.00 | H |
| ATOM | 2515 | HG2  | GLN | 160 | -13.015 | -9.543  | 4.516  | 0.00 | 0.00 | H |
| ATOM | 2516 | HG3  | GLN | 160 | -13.507 | -9.418  | 6.171  | 0.00 | 0.00 | H |
| ATOM | 2517 | 1HE2 | GLN | 160 | -16.661 | -8.382  | 4.494  | 0.00 | 0.00 | H |
| ATOM | 2518 | 2HE2 | GLN | 160 | -15.862 | -9.708  | 5.293  | 0.00 | 0.00 | H |
| ATOM | 2519 | N    | VAL | 161 | -9.229  | -6.248  | 5.232  | 0.00 | 0.00 | N |
| ATOM | 2520 | CA   | VAL | 161 | -8.320  | -5.049  | 5.191  | 0.00 | 0.00 | C |
| ATOM | 2521 | C    | VAL | 161 | -7.991  | -4.500  | 3.781  | 0.00 | 0.00 | C |
| ATOM | 2522 | O    | VAL | 161 | -8.016  | -3.272  | 3.630  | 0.00 | 0.00 | O |
| ATOM | 2523 | CB   | VAL | 161 | -7.135  | -5.147  | 6.145  | 0.00 | 0.00 | C |
| ATOM | 2524 | CG1  | VAL | 161 | -7.513  | -5.060  | 7.641  | 0.00 | 0.00 | C |
| ATOM | 2525 | CG2  | VAL | 161 | -6.293  | -6.370  | 5.874  | 0.00 | 0.00 | C |
| ATOM | 2526 | H    | VAL | 161 | -8.907  | -7.202  | 5.305  | 0.00 | 0.00 | H |
| ATOM | 2527 | HA   | VAL | 161 | -8.845  | -4.246  | 5.710  | 0.00 | 0.00 | H |
| ATOM | 2528 | HB   | VAL | 161 | -6.483  | -4.292  | 5.973  | 0.00 | 0.00 | H |
| ATOM | 2529 | 1HG1 | VAL | 161 | -6.620  | -5.147  | 8.261  | 0.00 | 0.00 | H |
| ATOM | 2530 | 2HG1 | VAL | 161 | -7.965  | -4.083  | 7.812  | 0.00 | 0.00 | H |
| ATOM | 2531 | 3HG1 | VAL | 161 | -8.166  | -5.857  | 7.995  | 0.00 | 0.00 | H |
| ATOM | 2532 | 1HG2 | VAL | 161 | -5.910  | -6.339  | 4.854  | 0.00 | 0.00 | H |
| ATOM | 2533 | 2HG2 | VAL | 161 | -5.460  | -6.395  | 6.577  | 0.00 | 0.00 | H |
| ATOM | 2534 | 3HG2 | VAL | 161 | -6.859  | -7.284  | 6.048  | 0.00 | 0.00 | H |
| ATOM | 2535 | N    | THR | 162 | -7.752  | -5.404  | 2.756  | 0.00 | 0.00 | N |
| ATOM | 2536 | CA   | THR | 162 | -7.463  | -4.959  | 1.361  | 0.00 | 0.00 | C |
| ATOM | 2537 | C    | THR | 162 | -8.506  | -4.028  | 0.869  | 0.00 | 0.00 | C |
| ATOM | 2538 | O    | THR | 162 | -8.104  | -2.949  | 0.523  | 0.00 | 0.00 | O |
| ATOM | 2539 | CB   | THR | 162 | -7.362  | -6.215  | 0.468  | 0.00 | 0.00 | C |
| ATOM | 2540 | CG2  | THR | 162 | -7.298  | -5.893  | -1.038 | 0.00 | 0.00 | C |
| ATOM | 2541 | OG1  | THR | 162 | -6.075  | -6.853  | 0.735  | 0.00 | 0.00 | O |
| ATOM | 2542 | H    | THR | 162 | -7.729  | -6.401  | 2.915  | 0.00 | 0.00 | H |
| ATOM | 2543 | HA   | THR | 162 | -6.564  | -4.341  | 1.398  | 0.00 | 0.00 | H |
| ATOM | 2544 | HB   | THR | 162 | -8.153  | -6.952  | 0.610  | 0.00 | 0.00 | H |
| ATOM | 2545 | HG1  | THR | 162 | -6.168  | -7.272  | 1.594  | 0.00 | 0.00 | H |
| ATOM | 2546 | 1HG2 | THR | 162 | -7.326  | -6.829  | -1.596 | 0.00 | 0.00 | H |
| ATOM | 2547 | 2HG2 | THR | 162 | -8.156  | -5.312  | -1.378 | 0.00 | 0.00 | H |
| ATOM | 2548 | 3HG2 | THR | 162 | -6.424  | -5.320  | -1.348 | 0.00 | 0.00 | H |
| ATOM | 2549 | N    | ARG | 163 | -9.824  | -4.336  | 0.990  | 0.00 | 0.00 | N |
| ATOM | 2550 | CA   | ARG | 163 | -10.884 | -3.417  | 0.614  | 0.00 | 0.00 | C |
| ATOM | 2551 | C    | ARG | 163 | -10.951 | -2.151  | 1.512  | 0.00 | 0.00 | C |
| ATOM | 2552 | O    | ARG | 163 | -11.290 | -1.154  | 0.898  | 0.00 | 0.00 | O |
| ATOM | 2553 | CB   | ARG | 163 | -12.205 | -4.223  | 0.785  | 0.00 | 0.00 | C |
| ATOM | 2554 | CG   | ARG | 163 | -13.627 | -3.717  | 0.321  | 0.00 | 0.00 | C |
| ATOM | 2555 | CD   | ARG | 163 | -14.022 | -4.042  | -1.156 | 0.00 | 0.00 | C |
| ATOM | 2556 | NE   | ARG | 163 | -13.311 | -3.199  | -2.109 | 0.00 | 0.00 | N |
| ATOM | 2557 | CZ   | ARG | 163 | -13.271 | -1.912  | -2.379 | 0.00 | 0.00 | C |
| ATOM | 2558 | NH1  | ARG | 163 | -13.961 | -0.997  | -1.785 | 0.00 | 0.00 | N |
| ATOM | 2559 | NH2  | ARG | 163 | -12.449 | -1.546  | -3.303 | 0.00 | 0.00 | N |
| ATOM | 2560 | H    | ARG | 163 | -10.194 | -5.209  | 1.338  | 0.00 | 0.00 | H |
| ATOM | 2561 | HA   | ARG | 163 | -10.755 | -3.097  | -0.420 | 0.00 | 0.00 | H |
| ATOM | 2562 | HB2  | ARG | 163 | -12.037 | -5.233  | 0.408  | 0.00 | 0.00 | H |
| ATOM | 2563 | HB3  | ARG | 163 | -12.313 | -4.434  | 1.848  | 0.00 | 0.00 | H |
| ATOM | 2564 | HG2  | ARG | 163 | -14.429 | -4.160  | 0.914  | 0.00 | 0.00 | H |
| ATOM | 2565 | HG3  | ARG | 163 | -13.729 | -2.642  | 0.476  | 0.00 | 0.00 | H |
| ATOM | 2566 | HD2  | ARG | 163 | -13.729 | -5.074  | -1.353 | 0.00 | 0.00 | H |
| ATOM | 2567 | HD3  | ARG | 163 | -15.100 | -4.067  | -1.316 | 0.00 | 0.00 | H |
| ATOM | 2568 | HE   | ARG | 163 | -12.724 | -3.702  | -2.759 | 0.00 | 0.00 | H |
| ATOM | 2569 | 1HH1 | ARG | 163 | -14.353 | -1.195  | -0.875 | 0.00 | 0.00 | H |
| ATOM | 2570 | 2HH1 | ARG | 163 | -14.019 | -0.061  | -2.163 | 0.00 | 0.00 | H |
| ATOM | 2571 | 1HH2 | ARG | 163 | -12.032 | -2.311  | -3.814 | 0.00 | 0.00 | H |
| ATOM | 2572 | 2HH2 | ARG | 163 | -12.358 | -0.588  | -3.607 | 0.00 | 0.00 | H |
| ATOM | 2573 | N    | PHE | 164 | -10.654 | -2.206  | 2.828  | 0.00 | 0.00 | N |
| ATOM | 2574 | CA   | PHE | 164 | -10.661 | -1.044  | 3.783  | 0.00 | 0.00 | C |
| ATOM | 2575 | C    | PHE | 164 | -9.655  | 0.038   | 3.342  | 0.00 | 0.00 | C |
| ATOM | 2576 | O    | PHE | 164 | -10.041 | 1.254   | 3.513  | 0.00 | 0.00 | O |
| ATOM | 2577 | CB   | PHE | 164 | -10.411 | -1.413  | 5.272  | 0.00 | 0.00 | C |
| ATOM | 2578 | CG   | PHE | 164 | -10.823 | -0.276  | 6.220  | 0.00 | 0.00 | C |
| ATOM | 2579 | CD1  | PHE | 164 | -9.867  | 0.540   | 6.740  | 0.00 | 0.00 | C |
| ATOM | 2580 | CD2  | PHE | 164 | -12.199 | -0.105  | 6.355  | 0.00 | 0.00 | C |
| ATOM | 2581 | CE1  | PHE | 164 | -10.270 | 1.501   | 7.656  | 0.00 | 0.00 | C |
| ATOM | 2582 | CE2  | PHE | 164 | -12.638 | 0.830   | 7.333  | 0.00 | 0.00 | C |
| ATOM | 2583 | CZ   | PHE | 164 | -11.687 | 1.676   | 7.873  | 0.00 | 0.00 | C |
| ATOM | 2584 | H    | PHE | 164 | -10.276 | -3.099  | 3.107  | 0.00 | 0.00 | H |
| ATOM | 2585 | HA   | PHE | 164 | -11.621 | -0.526  | 3.766  | 0.00 | 0.00 | H |
| ATOM | 2586 | HB2  | PHE | 164 | -10.919 | -2.289  | 5.675  | 0.00 | 0.00 | H |
| ATOM | 2587 | HB3  | PHE | 164 | -9.333  | -1.529  | 5.384  | 0.00 | 0.00 | H |
| ATOM | 2588 | HD1  | PHE | 164 | -8.830  | 0.404   | 6.471  | 0.00 | 0.00 | H |
| ATOM | 2589 | HD2  | PHE | 164 | -12.874 | -0.631  | 5.696  | 0.00 | 0.00 | H |
| ATOM | 2590 | HE1  | PHE | 164 | -9.573  | 2.064   | 8.258  | 0.00 | 0.00 | H |
| ATOM | 2591 | HE2  | PHE | 164 | -13.707 | 0.914   | 7.469  | 0.00 | 0.00 | H |
| ATOM | 2592 | HZ   | PHE | 164 | -12.017 | 2.388   | 8.616  | 0.00 | 0.00 | H |
| ATOM | 2593 | N    | VAL | 165 | -8.456  | -0.395  | 2.813  | 0.00 | 0.00 | N |
| ATOM | 2594 | CA   | VAL | 165 | -7.482  | 0.601   | 2.232  | 0.00 | 0.00 | C |
| ATOM | 2595 | C    | VAL | 165 | -7.974  | 1.399   | 1.004  | 0.00 | 0.00 | C |
| ATOM | 2596 | O    | VAL | 165 | -7.636  | 2.529   | 0.823  | 0.00 | 0.00 | O |
| ATOM | 2597 | CB   | VAL | 165 | -6.194  | -0.112  | 1.740  | 0.00 | 0.00 | C |
| ATOM | 2598 | CG1  | VAL | 165 | -5.234  | 0.919   | 1.176  | 0.00 | 0.00 | C |

|      |      |      |     |     |         |        |        |      |      |   |
|------|------|------|-----|-----|---------|--------|--------|------|------|---|
| ATOM | 2599 | CG2  | VAL | 165 | -5.488  | -0.805 | 2.954  | 0.00 | 0.00 | C |
| ATOM | 2600 | H    | VAL | 165 | -8.250  | -1.382 | 2.758  | 0.00 | 0.00 | H |
| ATOM | 2601 | HA   | VAL | 165 | -7.209  | 1.274  | 3.047  | 0.00 | 0.00 | H |
| ATOM | 2602 | HB   | VAL | 165 | -6.464  | -0.785 | 0.926  | 0.00 | 0.00 | H |
| ATOM | 2603 | 1HG1 | VAL | 165 | -5.662  | 1.292  | 0.245  | 0.00 | 0.00 | H |
| ATOM | 2604 | 2HG1 | VAL | 165 | -4.953  | 1.753  | 1.820  | 0.00 | 0.00 | H |
| ATOM | 2605 | 3HG1 | VAL | 165 | -4.276  | 0.440  | 0.968  | 0.00 | 0.00 | H |
| ATOM | 2606 | 1HG2 | VAL | 165 | -6.068  | -1.678 | 3.252  | 0.00 | 0.00 | H |
| ATOM | 2607 | 2HG2 | VAL | 165 | -4.484  | -1.121 | 2.668  | 0.00 | 0.00 | H |
| ATOM | 2608 | 3HG2 | VAL | 165 | -5.426  | -0.142 | 3.817  | 0.00 | 0.00 | H |
| ATOM | 2609 | N    | VAL | 166 | -8.874  | 0.774  | 0.227  | 0.00 | 0.00 | N |
| ATOM | 2610 | CA   | VAL | 166 | -9.330  | 1.282  | -1.038 | 0.00 | 0.00 | C |
| ATOM | 2611 | C    | VAL | 166 | -10.695 | 1.995  | -0.971 | 0.00 | 0.00 | C |
| ATOM | 2612 | O    | VAL | 166 | -10.943 | 2.950  | -1.736 | 0.00 | 0.00 | O |
| ATOM | 2613 | CB   | VAL | 166 | -9.252  | 0.140  | -2.070 | 0.00 | 0.00 | C |
| ATOM | 2614 | CG1  | VAL | 166 | -9.557  | 0.624  | -3.521 | 0.00 | 0.00 | C |
| ATOM | 2615 | CG2  | VAL | 166 | -7.785  | -0.434 | -2.259 | 0.00 | 0.00 | C |
| ATOM | 2616 | H    | VAL | 166 | -9.086  | -0.207 | 0.339  | 0.00 | 0.00 | H |
| ATOM | 2617 | HA   | VAL | 166 | -8.676  | 2.087  | -1.373 | 0.00 | 0.00 | H |
| ATOM | 2618 | HB   | VAL | 166 | -9.926  | -0.664 | -1.774 | 0.00 | 0.00 | H |
| ATOM | 2619 | 1HG1 | VAL | 166 | -8.761  | 1.304  | -3.822 | 0.00 | 0.00 | H |
| ATOM | 2620 | 2HG1 | VAL | 166 | -9.535  | -0.179 | -4.257 | 0.00 | 0.00 | H |
| ATOM | 2621 | 3HG1 | VAL | 166 | -10.515 | 1.143  | -3.498 | 0.00 | 0.00 | H |
| ATOM | 2622 | 1HG2 | VAL | 166 | -7.113  | 0.366  | -2.572 | 0.00 | 0.00 | H |
| ATOM | 2623 | 2HG2 | VAL | 166 | -7.893  | -1.079 | -3.132 | 0.00 | 0.00 | H |
| ATOM | 2624 | 3HG2 | VAL | 166 | -7.404  | -1.026 | -1.427 | 0.00 | 0.00 | H |
| ATOM | 2625 | N    | ASP | 167 | -11.547 | 1.542  | -0.077 | 0.00 | 0.00 | N |
| ATOM | 2626 | CA   | ASP | 167 | -12.798 | 2.139  | 0.285  | 0.00 | 0.00 | C |
| ATOM | 2627 | C    | ASP | 167 | -12.590 | 3.542  | 0.873  | 0.00 | 0.00 | C |
| ATOM | 2628 | O    | ASP | 167 | -13.293 | 4.545  | 0.523  | 0.00 | 0.00 | O |
| ATOM | 2629 | CB   | ASP | 167 | -13.490 | 1.262  | 1.290  | 0.00 | 0.00 | C |
| ATOM | 2630 | CG   | ASP | 167 | -14.894 | 1.900  | 1.520  | 0.00 | 0.00 | C |
| ATOM | 2631 | OD1  | ASP | 167 | -15.085 | 2.522  | 2.581  | 0.00 | 0.00 | O |
| ATOM | 2632 | OD2  | ASP | 167 | -15.661 | 1.897  | 0.545  | 0.00 | 0.00 | O |
| ATOM | 2633 | H    | ASP | 167 | -11.268 | 0.732  | 0.457  | 0.00 | 0.00 | H |
| ATOM | 2634 | HA   | ASP | 167 | -13.385 | 2.196  | -0.631 | 0.00 | 0.00 | H |
| ATOM | 2635 | HB2  | ASP | 167 | -13.475 | 0.212  | 0.996  | 0.00 | 0.00 | H |
| ATOM | 2636 | HB3  | ASP | 167 | -12.894 | 1.338  | 2.201  | 0.00 | 0.00 | H |
| ATOM | 2637 | N    | PHE | 168 | -11.562 | 3.610  | 1.719  | 0.00 | 0.00 | N |
| ATOM | 2638 | CA   | PHE | 168 | -11.090 | 4.902  | 2.273  | 0.00 | 0.00 | C |
| ATOM | 2639 | C    | PHE | 168 | -10.778 | 5.817  | 1.126  | 0.00 | 0.00 | C |
| ATOM | 2640 | O    | PHE | 168 | -11.178 | 6.935  | 1.078  | 0.00 | 0.00 | O |
| ATOM | 2641 | CB   | PHE | 168 | -9.832  | 4.799  | 3.156  | 0.00 | 0.00 | C |
| ATOM | 2642 | CG   | PHE | 168 | -9.438  | 6.038  | 3.912  | 0.00 | 0.00 | C |
| ATOM | 2643 | CD1  | PHE | 168 | -9.861  | 6.158  | 5.274  | 0.00 | 0.00 | C |
| ATOM | 2644 | CD2  | PHE | 168 | -8.743  | 7.055  | 3.245  | 0.00 | 0.00 | C |
| ATOM | 2645 | CE1  | PHE | 168 | -9.464  | 7.329  | 5.952  | 0.00 | 0.00 | C |
| ATOM | 2646 | CE2  | PHE | 168 | -8.304  | 8.143  | 3.986  | 0.00 | 0.00 | C |
| ATOM | 2647 | CZ   | PHE | 168 | -8.708  | 8.304  | 5.306  | 0.00 | 0.00 | C |
| ATOM | 2648 | H    | PHE | 168 | -11.193 | 2.720  | 2.024  | 0.00 | 0.00 | H |
| ATOM | 2649 | HA   | PHE | 168 | -11.820 | 5.396  | 2.914  | 0.00 | 0.00 | H |
| ATOM | 2650 | HB2  | PHE | 168 | -10.022 | 4.039  | 3.915  | 0.00 | 0.00 | H |
| ATOM | 2651 | HB3  | PHE | 168 | -8.992  | 4.496  | 2.531  | 0.00 | 0.00 | H |
| ATOM | 2652 | HD1  | PHE | 168 | -10.302 | 5.303  | 5.766  | 0.00 | 0.00 | H |
| ATOM | 2653 | HD2  | PHE | 168 | -8.538  | 6.992  | 2.186  | 0.00 | 0.00 | H |
| ATOM | 2654 | HE1  | PHE | 168 | -9.784  | 7.466  | 6.973  | 0.00 | 0.00 | H |
| ATOM | 2655 | HE2  | PHE | 168 | -7.739  | 8.919  | 3.490  | 0.00 | 0.00 | H |
| ATOM | 2656 | HZ   | PHE | 168 | -8.314  | 9.167  | 5.822  | 0.00 | 0.00 | H |
| ATOM | 2657 | N    | MET | 169 | -9.973  | 5.356  | 0.122  | 0.00 | 0.00 | N |
| ATOM | 2658 | CA   | MET | 169 | -9.532  | 6.189  | -0.993 | 0.00 | 0.00 | C |
| ATOM | 2659 | C    | MET | 169 | -10.697 | 6.764  | -1.669 | 0.00 | 0.00 | C |
| ATOM | 2660 | O    | MET | 169 | -10.698 | 7.945  | -1.962 | 0.00 | 0.00 | O |
| ATOM | 2661 | CB   | MET | 169 | -8.574  | 5.462  | -2.023 | 0.00 | 0.00 | C |
| ATOM | 2662 | CG   | MET | 169 | -7.220  | 5.111  | -1.387 | 0.00 | 0.00 | C |
| ATOM | 2663 | SD   | MET | 169 | -5.842  | 4.832  | -2.502 | 0.00 | 0.00 | S |
| ATOM | 2664 | CE   | MET | 169 | -4.691  | 4.379  | -1.216 | 0.00 | 0.00 | C |
| ATOM | 2665 | H    | MET | 169 | -9.608  | 4.414  | 0.117  | 0.00 | 0.00 | H |
| ATOM | 2666 | HA   | MET | 169 | -9.007  | 7.041  | -0.560 | 0.00 | 0.00 | H |
| ATOM | 2667 | HB2  | MET | 169 | -8.966  | 4.540  | -2.450 | 0.00 | 0.00 | H |
| ATOM | 2668 | HB3  | MET | 169 | -8.416  | 6.074  | -2.910 | 0.00 | 0.00 | H |
| ATOM | 2669 | HG2  | MET | 169 | -6.920  | 5.813  | -0.608 | 0.00 | 0.00 | H |
| ATOM | 2670 | HG3  | MET | 169 | -7.393  | 4.168  | -0.869 | 0.00 | 0.00 | H |
| ATOM | 2671 | HE1  | MET | 169 | -5.168  | 3.691  | -0.516 | 0.00 | 0.00 | H |
| ATOM | 2672 | HE2  | MET | 169 | -3.881  | 3.934  | -1.792 | 0.00 | 0.00 | H |
| ATOM | 2673 | HE3  | MET | 169 | -4.396  | 5.272  | -0.665 | 0.00 | 0.00 | H |
| ATOM | 2674 | N    | LEU | 170 | -11.685 | 5.952  | -1.976 | 0.00 | 0.00 | N |
| ATOM | 2675 | CA   | LEU | 170 | -12.871 | 6.386  | -2.644 | 0.00 | 0.00 | C |
| ATOM | 2676 | C    | LEU | 170 | -13.643 | 7.384  | -1.812 | 0.00 | 0.00 | C |
| ATOM | 2677 | O    | LEU | 170 | -14.094 | 8.422  | -2.351 | 0.00 | 0.00 | O |
| ATOM | 2678 | CB   | LEU | 170 | -13.689 | 5.123  | -2.959 | 0.00 | 0.00 | C |
| ATOM | 2679 | CG   | LEU | 170 | -14.939 | 5.368  | -3.874 | 0.00 | 0.00 | C |
| ATOM | 2680 | CD1  | LEU | 170 | -14.493 | 6.058  | -5.159 | 0.00 | 0.00 | C |
| ATOM | 2681 | CD2  | LEU | 170 | -15.684 | 4.089  | -4.191 | 0.00 | 0.00 | C |
| ATOM | 2682 | H    | LEU | 170 | -11.723 | 5.000  | -1.640 | 0.00 | 0.00 | H |
| ATOM | 2683 | HA   | LEU | 170 | -12.516 | 6.842  | -3.568 | 0.00 | 0.00 | H |
| ATOM | 2684 | HB2  | LEU | 170 | -13.023 | 4.422  | -3.462 | 0.00 | 0.00 | H |
| ATOM | 2685 | HB3  | LEU | 170 | -14.077 | 4.787  | -1.997 | 0.00 | 0.00 | H |
| ATOM | 2686 | HG   | LEU | 170 | -15.736 | 5.894  | -3.350 | 0.00 | 0.00 | H |
| ATOM | 2687 | 1HD1 | LEU | 170 | -14.233 | 7.104  | -5.005 | 0.00 | 0.00 | H |
| ATOM | 2688 | 2HD1 | LEU | 170 | -13.651 | 5.551  | -5.630 | 0.00 | 0.00 | H |
| ATOM | 2689 | 3HD1 | LEU | 170 | -15.276 | 5.949  | -5.911 | 0.00 | 0.00 | H |
| ATOM | 2690 | 1HD2 | LEU | 170 | -16.444 | 4.255  | -4.953 | 0.00 | 0.00 | H |
| ATOM | 2691 | 2HD2 | LEU | 170 | -15.038 | 3.394  | -4.729 | 0.00 | 0.00 | H |
| ATOM | 2692 | 3HD2 | LEU | 170 | -16.151 | 3.748  | -3.267 | 0.00 | 0.00 | H |
| ATOM | 2693 | N    | HIP | 171 | -13.904 | 7.141  | -0.554 | 0.00 | 0.00 | N |
| ATOM | 2694 | CA   | HIP | 171 | -14.627 | 8.090  | 0.258  | 0.00 | 0.00 | C |
| ATOM | 2695 | C    | HIP | 171 | -13.885 | 9.399  | 0.524  | 0.00 | 0.00 | C |
| ATOM | 2696 | O    | HIP | 171 | -14.482 | 10.495 | 0.524  | 0.00 | 0.00 | O |
| ATOM | 2697 | CB   | HIP | 171 | -15.224 | 7.404  | 1.489  | 0.00 | 0.00 | C |
| ATOM | 2698 | CG   | HIP | 171 | -16.217 | 6.312  | 1.104  | 0.00 | 0.00 | C |
| ATOM | 2699 | CD2  | HIP | 171 | -17.502 | 6.514  | 0.510  | 0.00 | 0.00 | C |
| ATOM | 2700 | ND1  | HIP | 171 | -16.122 | 4.966  | 1.380  | 0.00 | 0.00 | N |
| ATOM | 2701 | CE1  | HIP | 171 | -17.257 | 4.378  | 0.939  | 0.00 | 0.00 | C |
| ATOM | 2702 | NE2  | HIP | 171 | -18.075 | 5.281  | 0.333  | 0.00 | 0.00 | N |
| ATOM | 2703 | H    | HIP | 171 | -13.783 | 6.224  | -0.148 | 0.00 | 0.00 | H |

|      |      |      |     |     |         |        |        |      |      |   |
|------|------|------|-----|-----|---------|--------|--------|------|------|---|
| ATOM | 2704 | HA   | HIP | 171 | -15.554 | 8.342  | -0.256 | 0.00 | 0.00 | H |
| ATOM | 2705 | HB2  | HIP | 171 | -14.385 | 7.032  | 2.078  | 0.00 | 0.00 | H |
| ATOM | 2706 | HB3  | HIP | 171 | -15.796 | 8.212  | 1.948  | 0.00 | 0.00 | H |
| ATOM | 2707 | HD1  | HIP | 171 | -15.264 | 4.465  | 1.565  | 0.00 | 0.00 | H |
| ATOM | 2708 | HD2  | HIP | 171 | -17.873 | 7.447  | 0.111  | 0.00 | 0.00 | H |
| ATOM | 2709 | HE1  | HIP | 171 | -17.379 | 3.305  | 0.979  | 0.00 | 0.00 | H |
| ATOM | 2710 | HE2  | HIP | 171 | -18.959 | 5.086  | -0.115 | 0.00 | 0.00 | H |
| ATOM | 2711 | N    | HIP | 172 | -12.543 | 9.280  | 0.616  | 0.00 | 0.00 | N |
| ATOM | 2712 | CA   | HIP | 172 | -11.754 | 10.516 | 0.784  | 0.00 | 0.00 | C |
| ATOM | 2713 | C    | HIP | 172 | -11.210 | 11.106 | -0.522 | 0.00 | 0.00 | C |
| ATOM | 2714 | O    | HIP | 172 | -10.164 | 11.716 | -0.534 | 0.00 | 0.00 | O |
| ATOM | 2715 | CB   | HIP | 172 | -10.705 | 10.219 | 1.805  | 0.00 | 0.00 | C |
| ATOM | 2716 | CG   | HIP | 172 | -11.203 | 10.028 | 3.242  | 0.00 | 0.00 | C |
| ATOM | 2717 | CD2  | HIP | 172 | -11.787 | 8.929  | 3.720  | 0.00 | 0.00 | C |
| ATOM | 2718 | ND1  | HIP | 172 | -11.191 | 11.009 | 4.180  | 0.00 | 0.00 | N |
| ATOM | 2719 | CE1  | HIP | 172 | -11.828 | 10.522 | 5.238  | 0.00 | 0.00 | C |
| ATOM | 2720 | NE2  | HIP | 172 | -12.171 | 9.284  | 5.031  | 0.00 | 0.00 | N |
| ATOM | 2721 | H    | HIP | 172 | -12.073 | 8.389  | 0.551  | 0.00 | 0.00 | H |
| ATOM | 2722 | HA   | HIP | 172 | -12.419 | 11.293 | 1.159  | 0.00 | 0.00 | H |
| ATOM | 2723 | HB2  | HIP | 172 | -10.148 | 9.348  | 1.458  | 0.00 | 0.00 | H |
| ATOM | 2724 | HB3  | HIP | 172 | -10.006 | 11.054 | 1.799  | 0.00 | 0.00 | H |
| ATOM | 2725 | HD1  | HIP | 172 | -10.936 | 11.951 | 3.917  | 0.00 | 0.00 | H |
| ATOM | 2726 | HD2  | HIP | 172 | -12.049 | 8.031  | 3.179  | 0.00 | 0.00 | H |
| ATOM | 2727 | HE1  | HIP | 172 | -11.879 | 11.056 | 6.175  | 0.00 | 0.00 | H |
| ATOM | 2728 | HE2  | HIP | 172 | -12.529 | 8.618  | 5.701  | 0.00 | 0.00 | H |
| ATOM | 2729 | N    | CYS | 173 | -11.915 | 11.028 | -1.674 | 0.00 | 0.00 | N |
| ATOM | 2730 | CA   | CYS | 173 | -11.619 | 11.618 | -3.031 | 0.00 | 0.00 | C |
| ATOM | 2731 | C    | CYS | 173 | -10.245 | 11.266 | -3.682 | 0.00 | 0.00 | C |
| ATOM | 2732 | O    | CYS | 173 | -9.781  | 11.800 | -4.682 | 0.00 | 0.00 | O |
| ATOM | 2733 | CB   | CYS | 173 | -11.920 | 13.157 | -3.166 | 0.00 | 0.00 | C |
| ATOM | 2734 | SG   | CYS | 173 | -13.543 | 13.541 | -2.421 | 0.00 | 0.00 | S |
| ATOM | 2735 | H    | CYS | 173 | -12.827 | 10.595 | -1.645 | 0.00 | 0.00 | H |
| ATOM | 2736 | HA   | CYS | 173 | -12.354 | 11.239 | -3.741 | 0.00 | 0.00 | H |
| ATOM | 2737 | HB2  | CYS | 173 | -11.199 | 13.774 | -2.630 | 0.00 | 0.00 | H |
| ATOM | 2738 | HB3  | CYS | 173 | -11.865 | 13.422 | -4.222 | 0.00 | 0.00 | H |
| ATOM | 2739 | HG   | CYS | 173 | -13.511 | 14.852 | -2.668 | 0.00 | 0.00 | H |
| ATOM | 2740 | N    | ILE | 174 | -9.466  | 10.310 | -3.125 | 0.00 | 0.00 | N |
| ATOM | 2741 | CA   | ILE | 174 | -8.157  | 9.918  | -3.590 | 0.00 | 0.00 | C |
| ATOM | 2742 | C    | ILE | 174 | -8.186  | 9.157  | -4.936 | 0.00 | 0.00 | C |
| ATOM | 2743 | O    | ILE | 174 | -7.373  | 9.499  | -5.829 | 0.00 | 0.00 | O |
| ATOM | 2744 | CB   | ILE | 174 | -7.333  | 9.229  | -2.502 | 0.00 | 0.00 | C |
| ATOM | 2745 | CG1  | ILE | 174 | -7.292  | 9.944  | -1.130 | 0.00 | 0.00 | C |
| ATOM | 2746 | CG2  | ILE | 174 | -5.935  | 8.885  | -3.066 | 0.00 | 0.00 | C |
| ATOM | 2747 | CD1  | ILE | 174 | -6.945  | 9.121  | 0.052  | 0.00 | 0.00 | C |
| ATOM | 2748 | H    | ILE | 174 | -9.853  | 9.763  | -2.369 | 0.00 | 0.00 | H |
| ATOM | 2749 | HA   | ILE | 174 | -7.583  | 10.816 | -3.823 | 0.00 | 0.00 | H |
| ATOM | 2750 | HB   | ILE | 174 | -7.765  | 8.262  | -2.242 | 0.00 | 0.00 | H |
| ATOM | 2751 | 2HG1 | ILE | 174 | -6.730  | 10.878 | -1.112 | 0.00 | 0.00 | H |
| ATOM | 2752 | 3HG1 | ILE | 174 | -8.288  | 10.335 | -0.927 | 0.00 | 0.00 | H |
| ATOM | 2753 | 1HG2 | ILE | 174 | -5.363  | 8.285  | -2.359 | 0.00 | 0.00 | H |
| ATOM | 2754 | 2HG2 | ILE | 174 | -6.035  | 8.200  | -3.907 | 0.00 | 0.00 | H |
| ATOM | 2755 | 3HG2 | ILE | 174 | -5.419  | 9.811  | -3.324 | 0.00 | 0.00 | H |
| ATOM | 2756 | 1HD1 | ILE | 174 | -7.781  | 8.469  | 0.308  | 0.00 | 0.00 | H |
| ATOM | 2757 | 2HD1 | ILE | 174 | -6.081  | 8.491  | -0.167 | 0.00 | 0.00 | H |
| ATOM | 2758 | 3HD1 | ILE | 174 | -6.891  | 9.761  | 0.933  | 0.00 | 0.00 | H |
| ATOM | 2759 | N    | ALA | 175 | -9.201  | 8.279  | -5.152 | 0.00 | 0.00 | N |
| ATOM | 2760 | CA   | ALA | 175 | -9.423  | 7.775  | -6.452 | 0.00 | 0.00 | C |
| ATOM | 2761 | C    | ALA | 175 | -9.675  | 8.793  | -7.511 | 0.00 | 0.00 | C |
| ATOM | 2762 | O    | ALA | 175 | -9.114  | 8.672  | -8.617 | 0.00 | 0.00 | O |
| ATOM | 2763 | CB   | ALA | 175 | -10.608 | 6.790  | -6.385 | 0.00 | 0.00 | C |
| ATOM | 2764 | H    | ALA | 175 | -9.822  | 8.024  | -4.397 | 0.00 | 0.00 | H |
| ATOM | 2765 | HA   | ALA | 175 | -8.590  | 7.127  | -6.725 | 0.00 | 0.00 | H |
| ATOM | 2766 | HB1  | ALA | 175 | -11.516 | 7.332  | -6.122 | 0.00 | 0.00 | H |
| ATOM | 2767 | HB2  | ALA | 175 | -10.848 | 6.302  | -7.329 | 0.00 | 0.00 | H |
| ATOM | 2768 | HB3  | ALA | 175 | -10.374 | 5.956  | -5.722 | 0.00 | 0.00 | H |
| ATOM | 2769 | N    | ARG | 176 | -10.383 | 9.926  | -7.230 | 0.00 | 0.00 | N |
| ATOM | 2770 | CA   | ARG | 176 | -10.598 | 11.038 | -8.108 | 0.00 | 0.00 | C |
| ATOM | 2771 | C    | ARG | 176 | -9.290  | 11.788 | -8.315 | 0.00 | 0.00 | C |
| ATOM | 2772 | O    | ARG | 176 | -9.063  | 12.088 | -9.433 | 0.00 | 0.00 | O |
| ATOM | 2773 | CB   | ARG | 176 | -11.646 | 12.009 | -7.514 | 0.00 | 0.00 | C |
| ATOM | 2774 | CG   | ARG | 176 | -12.029 | 13.319 | -8.293 | 0.00 | 0.00 | C |
| ATOM | 2775 | CD   | ARG | 176 | -13.023 | 14.270 | -7.609 | 0.00 | 0.00 | C |
| ATOM | 2776 | NE   | ARG | 176 | -14.187 | 13.567 | -7.060 | 0.00 | 0.00 | N |
| ATOM | 2777 | CZ   | ARG | 176 | -15.223 | 14.005 | -6.311 | 0.00 | 0.00 | C |
| ATOM | 2778 | NH1  | ARG | 176 | -15.431 | 15.232 | -5.914 | 0.00 | 0.00 | N |
| ATOM | 2779 | NH2  | ARG | 176 | -16.114 | 13.109 | -5.952 | 0.00 | 0.00 | N |
| ATOM | 2780 | H    | ARG | 176 | -10.846 | 10.000 | -6.336 | 0.00 | 0.00 | H |
| ATOM | 2781 | HA   | ARG | 176 | -10.935 | 10.643 | -9.066 | 0.00 | 0.00 | H |
| ATOM | 2782 | HB2  | ARG | 176 | -12.505 | 11.367 | -7.320 | 0.00 | 0.00 | H |
| ATOM | 2783 | HB3  | ARG | 176 | -11.213 | 12.384 | -6.587 | 0.00 | 0.00 | H |
| ATOM | 2784 | HG2  | ARG | 176 | -11.198 | 14.018 | -8.378 | 0.00 | 0.00 | H |
| ATOM | 2785 | HG3  | ARG | 176 | -12.446 | 13.095 | -9.276 | 0.00 | 0.00 | H |
| ATOM | 2786 | HD2  | ARG | 176 | -12.560 | 14.803 | -6.779 | 0.00 | 0.00 | H |
| ATOM | 2787 | HD3  | ARG | 176 | -13.393 | 14.960 | -8.368 | 0.00 | 0.00 | H |
| ATOM | 2788 | HE   | ARG | 176 | -14.373 | 12.616 | -7.346 | 0.00 | 0.00 | H |
| ATOM | 2789 | 1HH1 | ARG | 176 | -14.769 | 15.971 | -6.103 | 0.00 | 0.00 | H |
| ATOM | 2790 | 2HH1 | ARG | 176 | -16.307 | 15.443 | -5.462 | 0.00 | 0.00 | H |
| ATOM | 2791 | 1HH2 | ARG | 176 | -15.952 | 12.161 | -6.261 | 0.00 | 0.00 | H |
| ATOM | 2792 | 2HH2 | ARG | 176 | -16.946 | 13.391 | -5.453 | 0.00 | 0.00 | H |
| ATOM | 2793 | N    | TRP | 177 | -8.405  | 11.997 | -7.352 | 0.00 | 0.00 | N |
| ATOM | 2794 | CA   | TRP | 177 | -7.036  | 12.548 | -7.564 | 0.00 | 0.00 | C |
| ATOM | 2795 | C    | TRP | 177 | -6.113  | 11.735 | -8.471 | 0.00 | 0.00 | C |
| ATOM | 2796 | O    | TRP | 177 | -5.481  | 12.312 | -9.339 | 0.00 | 0.00 | O |
| ATOM | 2797 | CB   | TRP | 177 | -6.338  | 12.817 | -6.241 | 0.00 | 0.00 | C |
| ATOM | 2798 | CG   | TRP | 177 | -5.127  | 13.610 | -6.417 | 0.00 | 0.00 | C |
| ATOM | 2799 | CD1  | TRP | 177 | -5.052  | 14.983 | -6.467 | 0.00 | 0.00 | C |
| ATOM | 2800 | CD2  | TRP | 177 | -3.802  | 13.097 | -6.572 | 0.00 | 0.00 | C |
| ATOM | 2801 | CE2  | TRP | 177 | -2.911  | 14.202 | -6.779 | 0.00 | 0.00 | C |
| ATOM | 2802 | CE3  | TRP | 177 | -3.200  | 11.771 | -6.591 | 0.00 | 0.00 | C |
| ATOM | 2803 | NE1  | TRP | 177 | -3.736  | 15.284 | -6.650 | 0.00 | 0.00 | N |
| ATOM | 2804 | CZ2  | TRP | 177 | -1.485  | 14.045 | -6.837 | 0.00 | 0.00 | C |
| ATOM | 2805 | CZ3  | TRP | 177 | -1.779  | 11.613 | -6.765 | 0.00 | 0.00 | C |
| ATOM | 2806 | CH2  | TRP | 177 | -0.913  | 12.743 | -6.941 | 0.00 | 0.00 | C |
| ATOM | 2807 | H    | TRP | 177 | -8.622  | 11.664 | -6.423 | 0.00 | 0.00 | H |
| ATOM | 2808 | HA   | TRP | 177 | -7.184  | 13.553 | -7.958 | 0.00 | 0.00 | H |

|      |      |      |     |     |         |        |         |      |      |   |
|------|------|------|-----|-----|---------|--------|---------|------|------|---|
| ATOM | 2809 | HB2  | TRP | 177 | -7.056  | 13.355 | -5.623  | 0.00 | 0.00 | H |
| ATOM | 2810 | HB3  | TRP | 177 | -6.129  | 11.869 | -5.743  | 0.00 | 0.00 | H |
| ATOM | 2811 | HD1  | TRP | 177 | -5.862  | 15.698 | -6.466  | 0.00 | 0.00 | H |
| ATOM | 2812 | HE1  | TRP | 177 | -3.472  | 16.259 | -6.662  | 0.00 | 0.00 | H |
| ATOM | 2813 | HE3  | TRP | 177 | -3.773  | 10.856 | -6.631  | 0.00 | 0.00 | H |
| ATOM | 2814 | HZ2  | TRP | 177 | -0.861  | 14.911 | -6.998  | 0.00 | 0.00 | H |
| ATOM | 2815 | HZ3  | TRP | 177 | -1.284  | 10.654 | -6.793  | 0.00 | 0.00 | H |
| ATOM | 2816 | HH2  | TRP | 177 | 0.151   | 12.567 | -7.007  | 0.00 | 0.00 | H |
| ATOM | 2817 | N    | ILE | 178 | -6.067  | 10.349 | -8.255  | 0.00 | 0.00 | N |
| ATOM | 2818 | CA   | ILE | 178 | -5.574  | 9.346  | -9.225  | 0.00 | 0.00 | C |
| ATOM | 2819 | C    | ILE | 178 | -6.083  | 9.524  | -10.674 | 0.00 | 0.00 | C |
| ATOM | 2820 | O    | ILE | 178 | -5.322  | 9.671  | -11.635 | 0.00 | 0.00 | O |
| ATOM | 2821 | CB   | ILE | 178 | -5.694  | 7.854  | -8.749  | 0.00 | 0.00 | C |
| ATOM | 2822 | CG1  | ILE | 178 | -4.987  | 7.638  | -7.394  | 0.00 | 0.00 | C |
| ATOM | 2823 | CG2  | ILE | 178 | -4.988  | 6.866  | -9.804  | 0.00 | 0.00 | C |
| ATOM | 2824 | CD1  | ILE | 178 | -5.371  | 6.363  | -6.594  | 0.00 | 0.00 | C |
| ATOM | 2825 | H    | ILE | 178 | -6.446  | 9.949  | -7.408  | 0.00 | 0.00 | H |
| ATOM | 2826 | HA   | ILE | 178 | -4.497  | 9.482  | -9.330  | 0.00 | 0.00 | H |
| ATOM | 2827 | HB   | ILE | 178 | -6.739  | 7.547  | -8.781  | 0.00 | 0.00 | H |
| ATOM | 2828 | ZHG1 | ILE | 178 | -3.988  | 7.541  | -7.514  | 0.00 | 0.00 | H |
| ATOM | 2829 | ZHG1 | ILE | 178 | -5.194  | 8.479  | -6.733  | 0.00 | 0.00 | H |
| ATOM | 2830 | 1HG2 | ILE | 178 | -4.122  | 7.444  | -10.126 | 0.00 | 0.00 | H |
| ATOM | 2831 | ZHG2 | ILE | 178 | -4.628  | 5.961  | -9.314  | 0.00 | 0.00 | H |
| ATOM | 2832 | 3HG2 | ILE | 178 | -5.678  | 6.644  | -10.618 | 0.00 | 0.00 | H |
| ATOM | 2833 | 1HD1 | ILE | 178 | -4.837  | 6.223  | -5.654  | 0.00 | 0.00 | H |
| ATOM | 2834 | ZHD1 | ILE | 178 | -6.433  | 6.404  | -6.355  | 0.00 | 0.00 | H |
| ATOM | 2835 | 3HD1 | ILE | 178 | -5.225  | 5.427  | -7.132  | 0.00 | 0.00 | H |
| ATOM | 2836 | N    | ALA | 179 | -7.376  | 9.610  | -10.803 | 0.00 | 0.00 | N |
| ATOM | 2837 | CA   | ALA | 179 | -8.182  | 9.665  | -12.027 | 0.00 | 0.00 | C |
| ATOM | 2838 | C    | ALA | 179 | -7.887  | 10.922 | -12.900 | 0.00 | 0.00 | C |
| ATOM | 2839 | O    | ALA | 179 | -7.873  | 10.814 | -14.109 | 0.00 | 0.00 | O |
| ATOM | 2840 | CB   | ALA | 179 | -9.580  | 9.466  | -11.507 | 0.00 | 0.00 | C |
| ATOM | 2841 | H    | ALA | 179 | -7.951  | 9.550  | -9.975  | 0.00 | 0.00 | H |
| ATOM | 2842 | HA   | ALA | 179 | -7.887  | 8.771  | -12.577 | 0.00 | 0.00 | H |
| ATOM | 2843 | HB1  | ALA | 179 | -9.886  | 10.314 | -10.894 | 0.00 | 0.00 | H |
| ATOM | 2844 | HB2  | ALA | 179 | -10.207 | 9.326  | -12.387 | 0.00 | 0.00 | H |
| ATOM | 2845 | HB3  | ALA | 179 | -9.654  | 8.514  | -10.981 | 0.00 | 0.00 | H |
| ATOM | 2846 | N    | GLN | 180 | -7.726  | 12.061 | -12.253 | 0.00 | 0.00 | N |
| ATOM | 2847 | CA   | GLN | 180 | -7.350  | 13.303 | -12.940 | 0.00 | 0.00 | C |
| ATOM | 2848 | C    | GLN | 180 | -5.801  | 13.487 | -13.120 | 0.00 | 0.00 | C |
| ATOM | 2849 | O    | GLN | 180 | -5.378  | 14.404 | -13.808 | 0.00 | 0.00 | O |
| ATOM | 2850 | CB   | GLN | 180 | -7.863  | 14.400 | -12.036 | 0.00 | 0.00 | C |
| ATOM | 2851 | CG   | GLN | 180 | -9.394  | 14.512 | -11.881 | 0.00 | 0.00 | C |
| ATOM | 2852 | CD   | GLN | 180 | -9.752  | 15.698 | -10.916 | 0.00 | 0.00 | C |
| ATOM | 2853 | NE2  | GLN | 180 | -11.034 | 15.812 | -10.719 | 0.00 | 0.00 | N |
| ATOM | 2854 | OE1  | GLN | 180 | -9.012  | 16.591 | -10.486 | 0.00 | 0.00 | O |
| ATOM | 2855 | H    | GLN | 180 | -7.796  | 12.114 | -11.247 | 0.00 | 0.00 | H |
| ATOM | 2856 | HA   | GLN | 180 | -7.769  | 13.384 | -13.944 | 0.00 | 0.00 | H |
| ATOM | 2857 | HB2  | GLN | 180 | -7.375  | 14.338 | -11.063 | 0.00 | 0.00 | H |
| ATOM | 2858 | HB3  | GLN | 180 | -7.616  | 15.362 | -12.484 | 0.00 | 0.00 | H |
| ATOM | 2859 | HG2  | GLN | 180 | -9.765  | 14.735 | -12.882 | 0.00 | 0.00 | H |
| ATOM | 2860 | HG3  | GLN | 180 | -9.822  | 13.569 | -11.541 | 0.00 | 0.00 | H |
| ATOM | 2861 | 1HE2 | GLN | 180 | -11.331 | 16.623 | -10.196 | 0.00 | 0.00 | H |
| ATOM | 2862 | ZHE2 | GLN | 180 | -11.641 | 15.177 | -11.214 | 0.00 | 0.00 | H |
| ATOM | 2863 | N    | ARG | 181 | -5.017  | 12.516 | -12.614 | 0.00 | 0.00 | N |
| ATOM | 2864 | CA   | ARG | 181 | -3.619  | 12.359 | -13.083 | 0.00 | 0.00 | C |
| ATOM | 2865 | C    | ARG | 181 | -3.351  | 11.319 | -14.231 | 0.00 | 0.00 | C |
| ATOM | 2866 | O    | ARG | 181 | -2.307  | 11.278 | -14.885 | 0.00 | 0.00 | O |
| ATOM | 2867 | CB   | ARG | 181 | -2.716  | 12.201 | -11.880 | 0.00 | 0.00 | C |
| ATOM | 2868 | CG   | ARG | 181 | -1.197  | 12.089 | -12.142 | 0.00 | 0.00 | C |
| ATOM | 2869 | CD   | ARG | 181 | -0.504  | 12.148 | -10.762 | 0.00 | 0.00 | C |
| ATOM | 2870 | NE   | ARG | 181 | 0.881   | 11.586 | -10.676 | 0.00 | 0.00 | N |
| ATOM | 2871 | CZ   | ARG | 181 | 2.008   | 12.234 | -10.594 | 0.00 | 0.00 | C |
| ATOM | 2872 | NH1  | ARG | 181 | 3.108   | 11.562 | -10.487 | 0.00 | 0.00 | N |
| ATOM | 2873 | NH2  | ARG | 181 | 1.995   | 13.551 | -10.483 | 0.00 | 0.00 | N |
| ATOM | 2874 | H    | ARG | 181 | -5.389  | 11.948 | -11.866 | 0.00 | 0.00 | H |
| ATOM | 2875 | HA   | ARG | 181 | -3.348  | 13.247 | -13.654 | 0.00 | 0.00 | H |
| ATOM | 2876 | HB2  | ARG | 181 | -2.942  | 13.047 | -11.230 | 0.00 | 0.00 | H |
| ATOM | 2877 | HB3  | ARG | 181 | -3.047  | 11.423 | -11.192 | 0.00 | 0.00 | H |
| ATOM | 2878 | HG2  | ARG | 181 | -1.041  | 11.093 | -12.559 | 0.00 | 0.00 | H |
| ATOM | 2879 | HG3  | ARG | 181 | -0.897  | 12.934 | -12.761 | 0.00 | 0.00 | H |
| ATOM | 2880 | HD2  | ARG | 181 | -0.544  | 13.139 | -10.311 | 0.00 | 0.00 | H |
| ATOM | 2881 | HD3  | ARG | 181 | -1.193  | 11.632 | -10.094 | 0.00 | 0.00 | H |
| ATOM | 2882 | HE   | ARG | 181 | 1.042   | 10.592 | -10.591 | 0.00 | 0.00 | H |
| ATOM | 2883 | 1HH1 | ARG | 181 | 3.008   | 10.558 | -10.531 | 0.00 | 0.00 | H |
| ATOM | 2884 | ZHH1 | ARG | 181 | 3.999   | 11.956 | -10.755 | 0.00 | 0.00 | H |
| ATOM | 2885 | 1HH2 | ARG | 181 | 1.248   | 14.119 | -10.860 | 0.00 | 0.00 | H |
| ATOM | 2886 | ZHH2 | ARG | 181 | 2.815   | 14.084 | -10.232 | 0.00 | 0.00 | H |
| ATOM | 2887 | N    | GLY | 182 | -4.350  | 10.505 | -14.541 | 0.00 | 0.00 | N |
| ATOM | 2888 | CA   | GLY | 182 | -4.479  | 9.563  | -15.645 | 0.00 | 0.00 | C |
| ATOM | 2889 | C    | GLY | 182 | -4.473  | 8.094  | -15.292 | 0.00 | 0.00 | C |
| ATOM | 2890 | O    | GLY | 182 | -4.170  | 7.258  | -16.146 | 0.00 | 0.00 | O |
| ATOM | 2891 | H    | GLY | 182 | -5.213  | 10.751 | -14.075 | 0.00 | 0.00 | H |
| ATOM | 2892 | HA2  | GLY | 182 | -5.457  | 9.782  | -16.077 | 0.00 | 0.00 | H |
| ATOM | 2893 | HA3  | GLY | 182 | -3.746  | 9.698  | -16.441 | 0.00 | 0.00 | H |
| ATOM | 2894 | N    | GLY | 183 | -4.590  | 7.697  | -14.005 | 0.00 | 0.00 | N |
| ATOM | 2895 | CA   | GLY | 183 | -4.578  | 6.305  | -13.519 | 0.00 | 0.00 | C |
| ATOM | 2896 | C    | GLY | 183 | -3.157  | 5.851  | -13.289 | 0.00 | 0.00 | C |
| ATOM | 2897 | O    | GLY | 183 | -2.268  | 6.659  | -13.602 | 0.00 | 0.00 | O |
| ATOM | 2898 | H    | GLY | 183 | -4.761  | 8.437  | -13.338 | 0.00 | 0.00 | H |
| ATOM | 2899 | HA2  | GLY | 183 | -5.250  | 6.283  | -12.661 | 0.00 | 0.00 | H |
| ATOM | 2900 | HA3  | GLY | 183 | -5.089  | 5.677  | -14.248 | 0.00 | 0.00 | H |
| ATOM | 2901 | N    | TRP | 184 | -2.960  | 4.699  | -12.683 | 0.00 | 0.00 | N |
| ATOM | 2902 | CA   | TRP | 184 | -1.607  | 4.331  | -12.179 | 0.00 | 0.00 | C |
| ATOM | 2903 | C    | TRP | 184 | -0.481  | 4.251  | -13.320 | 0.00 | 0.00 | C |
| ATOM | 2904 | O    | TRP | 184 | 0.660   | 4.732  | -13.148 | 0.00 | 0.00 | O |
| ATOM | 2905 | CB   | TRP | 184 | -1.765  | 2.969  | -11.422 | 0.00 | 0.00 | C |
| ATOM | 2906 | CG   | TRP | 184 | -2.474  | 3.000  | -10.128 | 0.00 | 0.00 | C |
| ATOM | 2907 | CD1  | TRP | 184 | -3.805  | 2.942  | -9.998  | 0.00 | 0.00 | C |
| ATOM | 2908 | CD2  | TRP | 184 | -1.930  | 3.079  | -8.823  | 0.00 | 0.00 | C |
| ATOM | 2909 | CE2  | TRP | 184 | -2.958  | 3.149  | -7.871  | 0.00 | 0.00 | C |
| ATOM | 2910 | CE3  | TRP | 184 | -0.587  | 3.173  | -8.294  | 0.00 | 0.00 | C |
| ATOM | 2911 | NE1  | TRP | 184 | -4.115  | 3.015  | -8.671  | 0.00 | 0.00 | N |
| ATOM | 2912 | CZ2  | TRP | 184 | -2.734  | 3.190  | -6.513  | 0.00 | 0.00 | C |
| ATOM | 2913 | CZ3  | TRP | 184 | -0.350  | 3.193  | -6.863  | 0.00 | 0.00 | C |

|      |      |      |     |     |        |        |         |      |      |   |
|------|------|------|-----|-----|--------|--------|---------|------|------|---|
| ATOM | 2914 | CH2  | TRP | 184 | -1.469 | 3.258  | -6.002  | 0.00 | 0.00 | C |
| ATOM | 2915 | H    | TRP | 184 | -3.795 | 4.217  | -12.388 | 0.00 | 0.00 | H |
| ATOM | 2916 | HA   | TRP | 184 | -1.355 | 5.130  | -11.482 | 0.00 | 0.00 | H |
| ATOM | 2917 | HB2  | TRP | 184 | -2.230 | 2.300  | -12.146 | 0.00 | 0.00 | H |
| ATOM | 2918 | HB3  | TRP | 184 | -0.770 | 2.565  | -11.237 | 0.00 | 0.00 | H |
| ATOM | 2919 | HD1  | TRP | 184 | -4.481 | 2.999  | -10.838 | 0.00 | 0.00 | H |
| ATOM | 2920 | HE1  | TRP | 184 | -5.078 | 3.122  | -8.387  | 0.00 | 0.00 | H |
| ATOM | 2921 | HE3  | TRP | 184 | 0.231  | 3.197  | -8.999  | 0.00 | 0.00 | H |
| ATOM | 2922 | HZ2  | TRP | 184 | -3.594 | 3.226  | -5.863  | 0.00 | 0.00 | H |
| ATOM | 2923 | HZ3  | TRP | 184 | 0.649  | 3.142  | -6.456  | 0.00 | 0.00 | H |
| ATOM | 2924 | HH2  | TRP | 184 | -1.327 | 3.380  | -4.939  | 0.00 | 0.00 | H |
| ATOM | 2925 | N    | VAL | 185 | -0.801 | 3.651  | -14.465 | 0.00 | 0.00 | N |
| ATOM | 2926 | CA   | VAL | 185 | 0.030  | 3.436  | -15.638 | 0.00 | 0.00 | C |
| ATOM | 2927 | C    | VAL | 185 | 0.571  | 4.747  | -16.178 | 0.00 | 0.00 | C |
| ATOM | 2928 | O    | VAL | 185 | 1.668  | 4.865  | -16.672 | 0.00 | 0.00 | O |
| ATOM | 2929 | CB   | VAL | 185 | -0.755 | 2.574  | -16.690 | 0.00 | 0.00 | C |
| ATOM | 2930 | CG1  | VAL | 185 | 0.218  | 1.877  | -17.652 | 0.00 | 0.00 | C |
| ATOM | 2931 | CG2  | VAL | 185 | -1.527 | 1.305  | -16.043 | 0.00 | 0.00 | C |
| ATOM | 2932 | H    | VAL | 185 | -1.792 | 3.493  | -14.579 | 0.00 | 0.00 | H |
| ATOM | 2933 | HA   | VAL | 185 | 0.850  | 2.811  | -15.286 | 0.00 | 0.00 | H |
| ATOM | 2934 | HB   | VAL | 185 | -1.481 | 3.125  | -17.290 | 0.00 | 0.00 | H |
| ATOM | 2935 | 1HG1 | VAL | 185 | -0.286 | 1.022  | -18.103 | 0.00 | 0.00 | H |
| ATOM | 2936 | 2HG1 | VAL | 185 | 0.452  | 2.413  | -18.571 | 0.00 | 0.00 | H |
| ATOM | 2937 | 3HG1 | VAL | 185 | 1.107  | 1.480  | -17.160 | 0.00 | 0.00 | H |
| ATOM | 2938 | 1HG2 | VAL | 185 | -2.014 | 1.559  | -15.101 | 0.00 | 0.00 | H |
| ATOM | 2939 | 2HG2 | VAL | 185 | -2.184 | 0.708  | -16.675 | 0.00 | 0.00 | H |
| ATOM | 2940 | 3HG2 | VAL | 185 | -0.743 | 0.625  | -15.716 | 0.00 | 0.00 | H |
| ATOM | 2941 | N    | ALA | 186 | -0.110 | 5.856  | -15.933 | 0.00 | 0.00 | N |
| ATOM | 2942 | CA   | ALA | 186 | 0.343  | 7.161  | -16.357 | 0.00 | 0.00 | C |
| ATOM | 2943 | C    | ALA | 186 | 0.885  | 7.968  | -15.179 | 0.00 | 0.00 | C |
| ATOM | 2944 | O    | ALA | 186 | 1.995  | 8.544  | -15.247 | 0.00 | 0.00 | O |
| ATOM | 2945 | CB   | ALA | 186 | -0.838 | 7.863  | -17.035 | 0.00 | 0.00 | C |
| ATOM | 2946 | H    | ALA | 186 | -1.030 | 5.797  | -15.523 | 0.00 | 0.00 | H |
| ATOM | 2947 | HA   | ALA | 186 | 1.208  | 7.100  | -17.017 | 0.00 | 0.00 | H |
| ATOM | 2948 | HB1  | ALA | 186 | -0.563 | 8.881  | -17.315 | 0.00 | 0.00 | H |
| ATOM | 2949 | HB2  | ALA | 186 | -1.156 | 7.314  | -17.922 | 0.00 | 0.00 | H |
| ATOM | 2950 | HB3  | ALA | 186 | -1.718 | 7.860  | -16.391 | 0.00 | 0.00 | H |
| ATOM | 2951 | N    | ALA | 187 | 0.151  | 8.019  | -14.068 | 0.00 | 0.00 | N |
| ATOM | 2952 | CA   | ALA | 187 | 0.552  | 8.571  | -12.760 | 0.00 | 0.00 | C |
| ATOM | 2953 | C    | ALA | 187 | 2.001  | 8.174  | -12.288 | 0.00 | 0.00 | C |
| ATOM | 2954 | O    | ALA | 187 | 2.665  | 8.954  | -11.641 | 0.00 | 0.00 | O |
| ATOM | 2955 | CB   | ALA | 187 | -0.458 | 8.286  | -11.707 | 0.00 | 0.00 | C |
| ATOM | 2956 | H    | ALA | 187 | -0.734 | 7.535  | -14.012 | 0.00 | 0.00 | H |
| ATOM | 2957 | HA   | ALA | 187 | 0.468  | 9.649  | -12.893 | 0.00 | 0.00 | H |
| ATOM | 2958 | HB1  | ALA | 187 | -0.384 | 9.016  | -10.903 | 0.00 | 0.00 | H |
| ATOM | 2959 | HB2  | ALA | 187 | -1.471 | 8.379  | -12.098 | 0.00 | 0.00 | H |
| ATOM | 2960 | HB3  | ALA | 187 | -0.309 | 7.289  | -11.291 | 0.00 | 0.00 | H |
| ATOM | 2961 | N    | LEU | 188 | 2.475  | 6.941  | -12.624 | 0.00 | 0.00 | N |
| ATOM | 2962 | CA   | LEU | 188 | 3.840  | 6.417  | -12.499 | 0.00 | 0.00 | C |
| ATOM | 2963 | C    | LEU | 188 | 4.853  | 6.715  | -13.619 | 0.00 | 0.00 | C |
| ATOM | 2964 | O    | LEU | 188 | 6.019  | 6.891  | -13.316 | 0.00 | 0.00 | O |
| ATOM | 2965 | CB   | LEU | 188 | 3.761  | 4.882  | -12.240 | 0.00 | 0.00 | C |
| ATOM | 2966 | CG   | LEU | 188 | 5.033  | 4.169  | -11.802 | 0.00 | 0.00 | C |
| ATOM | 2967 | CD1  | LEU | 188 | 5.378  | 4.707  | -10.475 | 0.00 | 0.00 | C |
| ATOM | 2968 | CD2  | LEU | 188 | 4.755  | 2.662  | -11.723 | 0.00 | 0.00 | C |
| ATOM | 2969 | H    | LEU | 188 | 1.757  | 6.458  | -13.145 | 0.00 | 0.00 | H |
| ATOM | 2970 | HA   | LEU | 188 | 4.359  | 6.788  | -11.615 | 0.00 | 0.00 | H |
| ATOM | 2971 | HB2  | LEU | 188 | 3.066  | 4.745  | -11.411 | 0.00 | 0.00 | H |
| ATOM | 2972 | HB3  | LEU | 188 | 3.428  | 4.461  | -13.188 | 0.00 | 0.00 | H |
| ATOM | 2973 | HG   | LEU | 188 | 5.827  | 4.327  | -12.531 | 0.00 | 0.00 | H |
| ATOM | 2974 | 1HD1 | LEU | 188 | 5.669  | 5.752  | -10.585 | 0.00 | 0.00 | H |
| ATOM | 2975 | 2HD1 | LEU | 188 | 4.558  | 4.622  | -9.761  | 0.00 | 0.00 | H |
| ATOM | 2976 | 3HD1 | LEU | 188 | 6.319  | 4.280  | -10.127 | 0.00 | 0.00 | H |
| ATOM | 2977 | 1HD2 | LEU | 188 | 5.631  | 2.115  | -11.373 | 0.00 | 0.00 | H |
| ATOM | 2978 | 2HD2 | LEU | 188 | 3.902  | 2.508  | -11.061 | 0.00 | 0.00 | H |
| ATOM | 2979 | 3HD2 | LEU | 188 | 4.456  | 2.324  | -12.713 | 0.00 | 0.00 | H |
| ATOM | 2980 | N    | ASN | 189 | 4.330  | 6.882  | -14.834 | 0.00 | 0.00 | N |
| ATOM | 2981 | CA   | ASN | 189 | 5.132  | 7.196  | -15.976 | 0.00 | 0.00 | C |
| ATOM | 2982 | C    | ASN | 189 | 5.720  | 8.662  | -15.905 | 0.00 | 0.00 | C |
| ATOM | 2983 | O    | ASN | 189 | 6.877  | 8.910  | -16.089 | 0.00 | 0.00 | O |
| ATOM | 2984 | CB   | ASN | 189 | 4.232  | 6.845  | -17.176 | 0.00 | 0.00 | C |
| ATOM | 2985 | CG   | ASN | 189 | 4.816  | 7.128  | -18.587 | 0.00 | 0.00 | C |
| ATOM | 2986 | ND2  | ASN | 189 | 4.105  | 6.663  | -19.620 | 0.00 | 0.00 | N |
| ATOM | 2987 | OD1  | ASN | 189 | 5.890  | 7.649  | -18.752 | 0.00 | 0.00 | O |
| ATOM | 2988 | H    | ASN | 189 | 3.334  | 6.870  | -14.996 | 0.00 | 0.00 | H |
| ATOM | 2989 | HA   | ASN | 189 | 5.935  | 6.460  | -15.966 | 0.00 | 0.00 | H |
| ATOM | 2990 | HB2  | ASN | 189 | 3.952  | 5.792  | -17.137 | 0.00 | 0.00 | H |
| ATOM | 2991 | HB3  | ASN | 189 | 3.353  | 7.490  | -17.185 | 0.00 | 0.00 | H |
| ATOM | 2992 | 1HD2 | ASN | 189 | 4.490  | 6.823  | -20.539 | 0.00 | 0.00 | H |
| ATOM | 2993 | 2HD2 | ASN | 189 | 3.159  | 6.352  | -19.447 | 0.00 | 0.00 | H |
| ATOM | 2994 | N    | LEU | 190 | 4.862  | 9.550  | -15.400 | 0.00 | 0.00 | N |
| ATOM | 2995 | CA   | LEU | 190 | 5.151  | 10.913 | -14.858 | 0.00 | 0.00 | C |
| ATOM | 2996 | C    | LEU | 190 | 5.964  | 10.834 | -13.567 | 0.00 | 0.00 | C |
| ATOM | 2997 | O    | LEU | 190 | 5.372  | 10.749 | -12.474 | 0.00 | 0.00 | O |
| ATOM | 2998 | CB   | LEU | 190 | 3.922  | 11.841 | -14.903 | 0.00 | 0.00 | C |
| ATOM | 2999 | CG   | LEU | 190 | 4.184  | 13.357 | -14.654 | 0.00 | 0.00 | C |
| ATOM | 3000 | CD1  | LEU | 190 | 5.128  | 14.038 | -15.719 | 0.00 | 0.00 | C |
| ATOM | 3001 | CD2  | LEU | 190 | 3.030  | 14.145 | -14.307 | 0.00 | 0.00 | C |
| ATOM | 3002 | H    | LEU | 190 | 3.914  | 9.214  | -15.307 | 0.00 | 0.00 | H |
| ATOM | 3003 | HA   | LEU | 190 | 5.808  | 11.341 | -15.617 | 0.00 | 0.00 | H |
| ATOM | 3004 | HB2  | LEU | 190 | 3.459  | 11.599 | -15.860 | 0.00 | 0.00 | H |
| ATOM | 3005 | HB3  | LEU | 190 | 3.221  | 11.480 | -14.151 | 0.00 | 0.00 | H |
| ATOM | 3006 | HG   | LEU | 190 | 4.726  | 13.419 | -13.712 | 0.00 | 0.00 | H |
| ATOM | 3007 | 1HD1 | LEU | 190 | 6.044  | 13.462 | -15.848 | 0.00 | 0.00 | H |
| ATOM | 3008 | 2HD1 | LEU | 190 | 4.579  | 14.076 | -16.660 | 0.00 | 0.00 | H |
| ATOM | 3009 | 3HD1 | LEU | 190 | 5.210  | 15.096 | -15.467 | 0.00 | 0.00 | H |
| ATOM | 3010 | 1HD2 | LEU | 190 | 2.556  | 13.633 | -13.470 | 0.00 | 0.00 | H |
| ATOM | 3011 | 2HD2 | LEU | 190 | 2.429  | 14.203 | -15.215 | 0.00 | 0.00 | H |
| ATOM | 3012 | 3HD2 | LEU | 190 | 3.311  | 15.174 | -14.088 | 0.00 | 0.00 | H |
| TER  | 3013 |      |     |     |        |        |         |      |      |   |
| ATOM | 3014 | O    | WAT | 204 | -4.290 | 14.794 | -9.654  | 0.00 | 0.00 | O |
| ATOM | 3015 | H1   | WAT | 204 | -4.665 | 13.920 | -9.762  | 0.00 | 0.00 | H |
| ATOM | 3016 | H2   | WAT | 204 | -3.925 | 14.789 | -8.769  | 0.00 | 0.00 | H |
| TER  | 3017 |      |     |     |        |        |         |      |      |   |
| ATOM | 3018 | O    | WAT | 231 | -2.497 | 11.176 | 25.238  | 0.00 | 0.00 | O |

|      |      |    |     |     |         |         |         |      |      |   |
|------|------|----|-----|-----|---------|---------|---------|------|------|---|
| ATOM | 3019 | H1 | WAT | 231 | -2.405  | 11.473  | 24.332  | 0.00 | 0.00 | H |
| ATOM | 3020 | H2 | WAT | 231 | -1.790  | 10.541  | 25.356  | 0.00 | 0.00 | H |
| TER  | 3021 |    | WAT | 231 |         |         |         |      |      |   |
| ATOM | 3022 | O  | WAT | 282 | -15.941 | 10.566  | -3.711  | 0.00 | 0.00 | O |
| ATOM | 3023 | H1 | WAT | 282 | -15.588 | 10.563  | -4.601  | 0.00 | 0.00 | H |
| ATOM | 3024 | H2 | WAT | 282 | -15.437 | 9.894   | -3.252  | 0.00 | 0.00 | H |
| TER  | 3025 |    | WAT | 282 |         |         |         |      |      |   |
| ATOM | 3026 | O  | WAT | 318 | -13.926 | 16.790  | -2.663  | 0.00 | 0.00 | O |
| ATOM | 3027 | H1 | WAT | 318 | -13.797 | 17.681  | -2.338  | 0.00 | 0.00 | H |
| ATOM | 3028 | H2 | WAT | 318 | -13.102 | 16.572  | -3.099  | 0.00 | 0.00 | H |
| TER  | 3029 |    | WAT | 318 |         |         |         |      |      |   |
| ATOM | 3030 | O  | WAT | 372 | -1.446  | -16.610 | 10.160  | 0.00 | 0.00 | O |
| ATOM | 3031 | H1 | WAT | 372 | -2.005  | -15.892 | 9.865   | 0.00 | 0.00 | H |
| ATOM | 3032 | H2 | WAT | 372 | -1.754  | -16.807 | 11.045  | 0.00 | 0.00 | H |
| TER  | 3033 |    | WAT | 372 |         |         |         |      |      |   |
| ATOM | 3034 | O  | WAT | 419 | -2.183  | -9.308  | -9.603  | 0.00 | 0.00 | O |
| ATOM | 3035 | H1 | WAT | 419 | -1.900  | -8.400  | -9.706  | 0.00 | 0.00 | H |
| ATOM | 3036 | H2 | WAT | 419 | -3.081  | -9.244  | -9.277  | 0.00 | 0.00 | H |
| TER  | 3037 |    | WAT | 419 |         |         |         |      |      |   |
| ATOM | 3038 | O  | WAT | 434 | -20.297 | 4.799   | -7.785  | 0.00 | 0.00 | O |
| ATOM | 3039 | H1 | WAT | 434 | -19.957 | 3.906   | -7.731  | 0.00 | 0.00 | H |
| ATOM | 3040 | H2 | WAT | 434 | -19.758 | 5.299   | -7.171  | 0.00 | 0.00 | H |
| TER  | 3041 |    | WAT | 434 |         |         |         |      |      |   |
| ATOM | 3042 | O  | WAT | 436 | 15.255  | 5.345   | 8.393   | 0.00 | 0.00 | O |
| ATOM | 3043 | H1 | WAT | 436 | 14.325  | 5.565   | 8.366   | 0.00 | 0.00 | H |
| ATOM | 3044 | H2 | WAT | 436 | 15.307  | 4.474   | 7.997   | 0.00 | 0.00 | H |
| TER  | 3045 |    | WAT | 436 |         |         |         |      |      |   |
| ATOM | 3046 | O  | WAT | 440 | -3.674  | -15.765 | -5.297  | 0.00 | 0.00 | O |
| ATOM | 3047 | H1 | WAT | 440 | -3.698  | -16.512 | -5.896  | 0.00 | 0.00 | H |
| ATOM | 3048 | H2 | WAT | 440 | -4.506  | -15.315 | -5.442  | 0.00 | 0.00 | H |
| TER  | 3049 |    | WAT | 440 |         |         |         |      |      |   |
| ATOM | 3050 | O  | WAT | 468 | -13.146 | 10.411  | -11.978 | 0.00 | 0.00 | O |
| ATOM | 3051 | H1 | WAT | 468 | -12.238 | 10.210  | -12.197 | 0.00 | 0.00 | H |
| ATOM | 3052 | H2 | WAT | 468 | -13.664 | 9.914   | -12.612 | 0.00 | 0.00 | H |
| TER  | 3053 |    | WAT | 468 |         |         |         |      |      |   |
| ATOM | 3054 | O  | WAT | 534 | -16.007 | 13.079  | 0.327   | 0.00 | 0.00 | O |
| ATOM | 3055 | H1 | WAT | 534 | -15.619 | 12.211  | 0.443   | 0.00 | 0.00 | H |
| ATOM | 3056 | H2 | WAT | 534 | -16.768 | 13.080  | 0.908   | 0.00 | 0.00 | H |
| TER  | 3057 |    | WAT | 534 |         |         |         |      |      |   |
| ATOM | 3058 | O  | WAT | 537 | 1.947   | -8.456  | 15.701  | 0.00 | 0.00 | O |
| ATOM | 3059 | H1 | WAT | 537 | 2.879   | -8.270  | 15.583  | 0.00 | 0.00 | H |
| ATOM | 3060 | H2 | WAT | 537 | 1.753   | -8.157  | 16.589  | 0.00 | 0.00 | H |
| ATOM | 3061 | O  | WAT | 538 | 7.972   | -7.439  | 10.905  | 0.00 | 0.00 | O |
| ATOM | 3062 | H1 | WAT | 538 | 7.643   | -8.316  | 10.709  | 0.00 | 0.00 | H |
| ATOM | 3063 | H2 | WAT | 538 | 8.760   | -7.354  | 10.367  | 0.00 | 0.00 | H |
| TER  | 3064 |    | WAT | 538 |         |         |         |      |      |   |
| ATOM | 3065 | O  | WAT | 545 | -5.963  | -11.029 | 18.364  | 0.00 | 0.00 | O |
| ATOM | 3066 | H1 | WAT | 545 | -5.567  | -10.426 | 17.737  | 0.00 | 0.00 | H |
| ATOM | 3067 | H2 | WAT | 545 | -6.381  | -11.699 | 17.823  | 0.00 | 0.00 | H |
| TER  | 3068 |    | WAT | 545 |         |         |         |      |      |   |
| ATOM | 3069 | O  | WAT | 550 | 11.309  | -17.139 | -7.444  | 0.00 | 0.00 | O |
| ATOM | 3070 | H1 | WAT | 550 | 10.547  | -16.800 | -6.975  | 0.00 | 0.00 | H |
| ATOM | 3071 | H2 | WAT | 550 | 12.059  | -16.769 | -6.980  | 0.00 | 0.00 | H |
| TER  | 3072 |    | WAT | 550 |         |         |         |      |      |   |
| ATOM | 3073 | O  | WAT | 591 | 9.232   | 9.774   | -11.405 | 0.00 | 0.00 | O |
| ATOM | 3074 | H1 | WAT | 591 | 8.765   | 8.997   | -11.099 | 0.00 | 0.00 | H |
| ATOM | 3075 | H2 | WAT | 591 | 10.152  | 9.593   | -11.211 | 0.00 | 0.00 | H |
| TER  | 3076 |    | WAT | 591 |         |         |         |      |      |   |
| ATOM | 3077 | O  | WAT | 610 | 20.093  | -3.311  | 4.482   | 0.00 | 0.00 | O |
| ATOM | 3078 | H1 | WAT | 610 | 19.371  | -3.738  | 4.021   | 0.00 | 0.00 | H |
| ATOM | 3079 | H2 | WAT | 610 | 20.442  | -2.681  | 3.852   | 0.00 | 0.00 | H |
| TER  | 3080 |    | WAT | 610 |         |         |         |      |      |   |
| ATOM | 3081 | O  | WAT | 613 | -8.794  | -17.201 | 2.391   | 0.00 | 0.00 | O |
| ATOM | 3082 | H1 | WAT | 613 | -7.917  | -16.822 | 2.335   | 0.00 | 0.00 | H |
| ATOM | 3083 | H2 | WAT | 613 | -8.717  | -17.889 | 3.051   | 0.00 | 0.00 | H |
| TER  | 3084 |    | WAT | 613 |         |         |         |      |      |   |
| ATOM | 3085 | O  | WAT | 630 | -10.011 | -20.861 | 6.780   | 0.00 | 0.00 | O |
| ATOM | 3086 | H1 | WAT | 630 | -9.407  | -21.231 | 6.138   | 0.00 | 0.00 | H |
| ATOM | 3087 | H2 | WAT | 630 | -9.917  | -19.913 | 6.679   | 0.00 | 0.00 | H |
| TER  | 3088 |    | WAT | 630 |         |         |         |      |      |   |
| ATOM | 3089 | O  | WAT | 632 | 0.042   | 10.198  | 22.388  | 0.00 | 0.00 | O |
| ATOM | 3090 | H1 | WAT | 632 | -0.750  | 10.716  | 22.529  | 0.00 | 0.00 | H |
| ATOM | 3091 | H2 | WAT | 632 | 0.586   | 10.377  | 23.155  | 0.00 | 0.00 | H |
| TER  | 3092 |    | WAT | 632 |         |         |         |      |      |   |
| ATOM | 3093 | O  | WAT | 645 | 0.320   | 19.361  | -3.437  | 0.00 | 0.00 | O |
| ATOM | 3094 | H1 | WAT | 645 | -0.344  | 18.693  | -3.269  | 0.00 | 0.00 | H |
| ATOM | 3095 | H2 | WAT | 645 | 0.811   | 19.421  | -2.618  | 0.00 | 0.00 | H |
| TER  | 3096 |    | WAT | 645 |         |         |         |      |      |   |
| ATOM | 3097 | O  | WAT | 660 | 8.254   | 8.312   | 17.932  | 0.00 | 0.00 | O |
| ATOM | 3098 | H1 | WAT | 660 | 7.580   | 7.673   | 17.700  | 0.00 | 0.00 | H |
| ATOM | 3099 | H2 | WAT | 660 | 7.791   | 9.148   | 17.969  | 0.00 | 0.00 | H |
| ATOM | 3100 | O  | WAT | 661 | -9.677  | -4.490  | 19.176  | 0.00 | 0.00 | O |
| ATOM | 3101 | H1 | WAT | 661 | -10.199 | -3.686  | 19.166  | 0.00 | 0.00 | H |
| ATOM | 3102 | H2 | WAT | 661 | -9.189  | -4.446  | 19.999  | 0.00 | 0.00 | H |
| TER  | 3103 |    | WAT | 661 |         |         |         |      |      |   |
| ATOM | 3104 | O  | WAT | 700 | -4.011  | -15.142 | -11.362 | 0.00 | 0.00 | O |
| ATOM | 3105 | H1 | WAT | 700 | -3.287  | -15.113 | -10.737 | 0.00 | 0.00 | H |
| ATOM | 3106 | H2 | WAT | 700 | -4.503  | -14.340 | -11.198 | 0.00 | 0.00 | H |
| TER  | 3107 |    | WAT | 700 |         |         |         |      |      |   |
| ATOM | 3108 | O  | WAT | 703 | 2.863   | 16.449  | 13.837  | 0.00 | 0.00 | O |
| ATOM | 3109 | H1 | WAT | 703 | 2.198   | 17.056  | 13.511  | 0.00 | 0.00 | H |
| ATOM | 3110 | H2 | WAT | 703 | 2.782   | 15.681  | 13.271  | 0.00 | 0.00 | H |
| TER  | 3111 |    | WAT | 703 |         |         |         |      |      |   |
| ATOM | 3112 | O  | WAT | 717 | 14.304  | 8.436   | 11.682  | 0.00 | 0.00 | O |
| ATOM | 3113 | H1 | WAT | 717 | 13.730  | 9.200   | 11.739  | 0.00 | 0.00 | H |
| ATOM | 3114 | H2 | WAT | 717 | 13.724  | 7.716   | 11.437  | 0.00 | 0.00 | H |
| TER  | 3115 |    | WAT | 717 |         |         |         |      |      |   |
| ATOM | 3116 | O  | WAT | 754 | -17.720 | 6.966   | -8.883  | 0.00 | 0.00 | O |
| ATOM | 3117 | H1 | WAT | 754 | -17.992 | 6.405   | -8.157  | 0.00 | 0.00 | H |
| ATOM | 3118 | H2 | WAT | 754 | -18.517 | 7.428   | -9.141  | 0.00 | 0.00 | H |
| TER  | 3119 |    | WAT | 754 |         |         |         |      |      |   |
| ATOM | 3120 | O  | WAT | 776 | -10.566 | -13.356 | -2.461  | 0.00 | 0.00 | O |
| ATOM | 3121 | H1 | WAT | 776 | -11.365 | -13.014 | -2.864  | 0.00 | 0.00 | H |
| ATOM | 3122 | H2 | WAT | 776 | -10.258 | -14.026 | -3.071  | 0.00 | 0.00 | H |
| TER  | 3123 |    | WAT | 776 |         |         |         |      |      |   |



|      |      |    |     |      |         |         |         |      |      |   |
|------|------|----|-----|------|---------|---------|---------|------|------|---|
| ATOM | 3124 | O  | WAT | 781  | -9.666  | -9.356  | -9.127  | 0.00 | 0.00 | O |
| ATOM | 3125 | H1 | WAT | 781  | -10.080 | -9.152  | -8.289  | 0.00 | 0.00 | H |
| ATOM | 3126 | H2 | WAT | 781  | -9.046  | -8.639  | -9.269  | 0.00 | 0.00 | H |
| TER  | 3127 |    | WAT | 781  |         |         |         |      |      |   |
| ATOM | 3128 | O  | WAT | 826  | 13.564  | -5.312  | 8.781   | 0.00 | 0.00 | O |
| ATOM | 3129 | H1 | WAT | 826  | 12.766  | -5.018  | 8.343   | 0.00 | 0.00 | H |
| ATOM | 3130 | H2 | WAT | 826  | 13.274  | -6.012  | 9.364   | 0.00 | 0.00 | H |
| TER  | 3131 |    | WAT | 826  |         |         |         |      |      |   |
| ATOM | 3132 | O  | WAT | 850  | -7.760  | -0.263  | -16.593 | 0.00 | 0.00 | O |
| ATOM | 3133 | H1 | WAT | 850  | -8.150  | 0.601   | -16.720 | 0.00 | 0.00 | H |
| ATOM | 3134 | H2 | WAT | 850  | -8.265  | -0.650  | -15.877 | 0.00 | 0.00 | H |
| TER  | 3135 |    | WAT | 850  |         |         |         |      |      |   |
| ATOM | 3136 | O  | WAT | 883  | 12.969  | 2.145   | -12.362 | 0.00 | 0.00 | O |
| ATOM | 3137 | H1 | WAT | 883  | 13.580  | 1.510   | -11.990 | 0.00 | 0.00 | H |
| ATOM | 3138 | H2 | WAT | 883  | 12.427  | 2.417   | -11.621 | 0.00 | 0.00 | H |
| TER  | 3139 |    | WAT | 883  |         |         |         |      |      |   |
| ATOM | 3140 | O  | WAT | 895  | 10.860  | 6.874   | 13.379  | 0.00 | 0.00 | O |
| ATOM | 3141 | H1 | WAT | 895  | 11.449  | 6.581   | 12.684  | 0.00 | 0.00 | H |
| ATOM | 3142 | H2 | WAT | 895  | 10.009  | 6.966   | 12.949  | 0.00 | 0.00 | H |
| TER  | 3143 |    | WAT | 895  |         |         |         |      |      |   |
| ATOM | 3144 | O  | WAT | 903  | 4.873   | -4.737  | 15.627  | 0.00 | 0.00 | O |
| ATOM | 3145 | H1 | WAT | 903  | 5.031   | -5.366  | 16.329  | 0.00 | 0.00 | H |
| ATOM | 3146 | H2 | WAT | 903  | 5.633   | -4.156  | 15.647  | 0.00 | 0.00 | H |
| TER  | 3147 |    | WAT | 903  |         |         |         |      |      |   |
| ATOM | 3148 | O  | WAT | 908  | -7.730  | -19.319 | 11.108  | 0.00 | 0.00 | O |
| ATOM | 3149 | H1 | WAT | 908  | -7.974  | -18.395 | 11.052  | 0.00 | 0.00 | H |
| ATOM | 3150 | H2 | WAT | 908  | -7.713  | -19.506 | 12.049  | 0.00 | 0.00 | H |
| TER  | 3151 |    | WAT | 908  |         |         |         |      |      |   |
| ATOM | 3152 | O  | WAT | 910  | 19.213  | 2.831   | -4.886  | 0.00 | 0.00 | O |
| ATOM | 3153 | H1 | WAT | 910  | 18.281  | 2.870   | -4.670  | 0.00 | 0.00 | H |
| ATOM | 3154 | H2 | WAT | 910  | 19.525  | 2.037   | -4.455  | 0.00 | 0.00 | H |
| TER  | 3155 |    | WAT | 910  |         |         |         |      |      |   |
| ATOM | 3156 | O  | WAT | 917  | 20.805  | -18.793 | 2.003   | 0.00 | 0.00 | O |
| ATOM | 3157 | H1 | WAT | 917  | 20.331  | -18.137 | 1.493   | 0.00 | 0.00 | H |
| ATOM | 3158 | H2 | WAT | 917  | 20.248  | -19.571 | 1.972   | 0.00 | 0.00 | H |
| TER  | 3159 |    | WAT | 917  |         |         |         |      |      |   |
| ATOM | 3160 | O  | WAT | 922  | -0.352  | 18.490  | 21.141  | 0.00 | 0.00 | O |
| ATOM | 3161 | H1 | WAT | 922  | 0.272   | 18.195  | 20.476  | 0.00 | 0.00 | H |
| ATOM | 3162 | H2 | WAT | 922  | -0.338  | 17.799  | 21.805  | 0.00 | 0.00 | H |
| TER  | 3163 |    | WAT | 922  |         |         |         |      |      |   |
| ATOM | 3164 | O  | WAT | 927  | 10.704  | -1.054  | -15.610 | 0.00 | 0.00 | O |
| ATOM | 3165 | H1 | WAT | 927  | 11.599  | -1.209  | -15.307 | 0.00 | 0.00 | H |
| ATOM | 3166 | H2 | WAT | 927  | 10.153  | -1.306  | -14.871 | 0.00 | 0.00 | H |
| TER  | 3167 |    | WAT | 927  |         |         |         |      |      |   |
| ATOM | 3168 | O  | WAT | 939  | -16.400 | 15.513  | -2.199  | 0.00 | 0.00 | O |
| ATOM | 3169 | H1 | WAT | 939  | -16.479 | 14.952  | -1.428  | 0.00 | 0.00 | H |
| ATOM | 3170 | H2 | WAT | 939  | -15.500 | 15.837  | -2.169  | 0.00 | 0.00 | H |
| TER  | 3171 |    | WAT | 939  |         |         |         |      |      |   |
| ATOM | 3172 | O  | WAT | 947  | 1.239   | -24.834 | -0.175  | 0.00 | 0.00 | O |
| ATOM | 3173 | H1 | WAT | 947  | 1.439   | -24.513 | -1.054  | 0.00 | 0.00 | H |
| ATOM | 3174 | H2 | WAT | 947  | 1.174   | -24.041 | 0.359   | 0.00 | 0.00 | H |
| TER  | 3175 |    | WAT | 947  |         |         |         |      |      |   |
| ATOM | 3176 | O  | WAT | 976  | 16.723  | 4.967   | -1.222  | 0.00 | 0.00 | O |
| ATOM | 3177 | H1 | WAT | 976  | 16.164  | 4.492   | -1.837  | 0.00 | 0.00 | H |
| ATOM | 3178 | H2 | WAT | 976  | 17.300  | 4.296   | -0.856  | 0.00 | 0.00 | H |
| TER  | 3179 |    | WAT | 976  |         |         |         |      |      |   |
| ATOM | 3180 | O  | WAT | 993  | -20.904 | 0.574   | -8.016  | 0.00 | 0.00 | O |
| ATOM | 3181 | H1 | WAT | 993  | -21.330 | 0.956   | -8.784  | 0.00 | 0.00 | H |
| ATOM | 3182 | H2 | WAT | 993  | -20.278 | 1.239   | -7.733  | 0.00 | 0.00 | H |
| TER  | 3183 |    | WAT | 993  |         |         |         |      |      |   |
| ATOM | 3184 | O  | WAT | 1003 | -4.604  | 10.755  | 22.747  | 0.00 | 0.00 | O |
| ATOM | 3185 | H1 | WAT | 1003 | -3.776  | 11.222  | 22.855  | 0.00 | 0.00 | H |
| ATOM | 3186 | H2 | WAT | 1003 | -4.576  | 10.063  | 23.409  | 0.00 | 0.00 | H |
| TER  | 3187 |    | WAT | 1003 |         |         |         |      |      |   |
| ATOM | 3188 | O  | WAT | 1022 | 6.896   | -22.096 | -3.949  | 0.00 | 0.00 | O |
| ATOM | 3189 | H1 | WAT | 1022 | 6.228   | -21.510 | -4.306  | 0.00 | 0.00 | H |
| ATOM | 3190 | H2 | WAT | 1022 | 7.242   | -21.630 | -3.188  | 0.00 | 0.00 | H |
| TER  | 3191 |    | WAT | 1022 |         |         |         |      |      |   |
| ATOM | 3192 | O  | WAT | 1027 | -13.296 | -6.480  | -5.089  | 0.00 | 0.00 | O |
| ATOM | 3193 | H1 | WAT | 1027 | -12.736 | -5.761  | -4.795  | 0.00 | 0.00 | H |
| ATOM | 3194 | H2 | WAT | 1027 | -12.954 | -7.251  | -4.637  | 0.00 | 0.00 | H |
| TER  | 3195 |    | WAT | 1027 |         |         |         |      |      |   |
| ATOM | 3196 | O  | WAT | 1054 | -7.408  | -3.370  | -14.222 | 0.00 | 0.00 | O |
| ATOM | 3197 | H1 | WAT | 1054 | -7.826  | -2.528  | -14.046 | 0.00 | 0.00 | H |
| ATOM | 3198 | H2 | WAT | 1054 | -7.767  | -3.646  | -15.064 | 0.00 | 0.00 | H |
| TER  | 3199 |    | WAT | 1054 |         |         |         |      |      |   |
| ATOM | 3200 | O  | WAT | 1094 | -5.839  | -19.790 | 9.246   | 0.00 | 0.00 | O |
| ATOM | 3201 | H1 | WAT | 1094 | -6.585  | -19.700 | 9.837   | 0.00 | 0.00 | H |
| ATOM | 3202 | H2 | WAT | 1094 | -5.259  | -20.412 | 9.684   | 0.00 | 0.00 | H |
| ATOM | 3203 | O  | WAT | 1095 | -15.794 | -7.211  | 13.305  | 0.00 | 0.00 | O |
| ATOM | 3204 | H1 | WAT | 1095 | -14.871 | -7.315  | 13.539  | 0.00 | 0.00 | H |
| ATOM | 3205 | H2 | WAT | 1095 | -15.878 | -6.287  | 13.066  | 0.00 | 0.00 | H |
| TER  | 3206 |    | WAT | 1095 |         |         |         |      |      |   |
| ATOM | 3207 | O  | WAT | 1121 | 8.181   | 9.234   | 14.101  | 0.00 | 0.00 | O |
| ATOM | 3208 | H1 | WAT | 1121 | 8.906   | 8.943   | 14.654  | 0.00 | 0.00 | H |
| ATOM | 3209 | H2 | WAT | 1121 | 7.953   | 8.463   | 13.582  | 0.00 | 0.00 | H |
| TER  | 3210 |    | WAT | 1121 |         |         |         |      |      |   |
| ATOM | 3211 | O  | WAT | 1131 | 21.335  | -1.413  | 3.057   | 0.00 | 0.00 | O |
| ATOM | 3212 | H1 | WAT | 1131 | 22.164  | -1.889  | 3.111   | 0.00 | 0.00 | H |
| ATOM | 3213 | H2 | WAT | 1131 | 21.544  | -0.531  | 3.364   | 0.00 | 0.00 | H |
| TER  | 3214 |    | WAT | 1131 |         |         |         |      |      |   |
| ATOM | 3215 | O  | WAT | 1141 | -17.537 | 1.339   | 2.883   | 0.00 | 0.00 | O |
| ATOM | 3216 | H1 | WAT | 1141 | -18.066 | 1.763   | 3.559   | 0.00 | 0.00 | H |
| ATOM | 3217 | H2 | WAT | 1141 | -16.646 | 1.647   | 3.048   | 0.00 | 0.00 | H |
| TER  | 3218 |    | WAT | 1141 |         |         |         |      |      |   |
| ATOM | 3219 | O  | WAT | 1184 | -0.352  | 17.209  | -5.985  | 0.00 | 0.00 | O |
| ATOM | 3220 | H1 | WAT | 1184 | -1.121  | 17.614  | -6.385  | 0.00 | 0.00 | H |
| ATOM | 3221 | H2 | WAT | 1184 | -0.679  | 16.821  | -5.173  | 0.00 | 0.00 | H |
| TER  | 3222 |    | WAT | 1184 |         |         |         |      |      |   |
| ATOM | 3223 | O  | WAT | 1216 | -12.123 | -16.415 | 5.408   | 0.00 | 0.00 | O |
| ATOM | 3224 | H1 | WAT | 1216 | -11.999 | -16.439 | 4.460   | 0.00 | 0.00 | H |
| ATOM | 3225 | H2 | WAT | 1216 | -12.186 | -15.484 | 5.619   | 0.00 | 0.00 | H |
| TER  | 3226 |    | WAT | 1216 |         |         |         |      |      |   |
| ATOM | 3227 | O  | WAT | 1238 | 1.074   | -7.559  | -19.699 | 0.00 | 0.00 | O |
| ATOM | 3228 | H1 | WAT | 1238 | 0.216   | -7.906  | -19.453 | 0.00 | 0.00 | H |

|      |      |    |     |      |         |         |         |      |      |   |
|------|------|----|-----|------|---------|---------|---------|------|------|---|
| ATOM | 3229 | H2 | WAT | 1238 | 1.472   | -8.253  | -20.222 | 0.00 | 0.00 | H |
| TER  | 3230 |    | WAT | 1238 |         |         |         |      |      |   |
| ATOM | 3231 | O  | WAT | 1247 | 6.981   | 1.904   | 19.560  | 0.00 | 0.00 | O |
| ATOM | 3232 | H1 | WAT | 1247 | 6.742   | 2.038   | 20.476  | 0.00 | 0.00 | H |
| ATOM | 3233 | H2 | WAT | 1247 | 7.081   | 0.957   | 19.473  | 0.00 | 0.00 | H |
| TER  | 3234 |    | WAT | 1247 |         |         |         |      |      |   |
| ATOM | 3235 | O  | WAT | 1278 | 7.869   | 5.783   | -20.604 | 0.00 | 0.00 | O |
| ATOM | 3236 | H1 | WAT | 1278 | 7.426   | 5.883   | -19.761 | 0.00 | 0.00 | H |
| ATOM | 3237 | H2 | WAT | 1278 | 7.924   | 6.673   | -20.953 | 0.00 | 0.00 | H |
| TER  | 3238 |    | WAT | 1278 |         |         |         |      |      |   |
| ATOM | 3239 | O  | WAT | 1299 | 10.769  | 16.722  | -12.109 | 0.00 | 0.00 | O |
| ATOM | 3240 | H1 | WAT | 1299 | 11.277  | 16.495  | -11.329 | 0.00 | 0.00 | H |
| ATOM | 3241 | H2 | WAT | 1299 | 10.359  | 17.559  | -11.890 | 0.00 | 0.00 | H |
| TER  | 3242 |    | WAT | 1299 |         |         |         |      |      |   |
| ATOM | 3243 | O  | WAT | 1312 | 5.949   | -12.777 | 10.334  | 0.00 | 0.00 | O |
| ATOM | 3244 | H1 | WAT | 1312 | 5.344   | -12.046 | 10.453  | 0.00 | 0.00 | H |
| ATOM | 3245 | H2 | WAT | 1312 | 6.434   | -12.559 | 9.538   | 0.00 | 0.00 | H |
| TER  | 3246 |    | WAT | 1312 |         |         |         |      |      |   |
| ATOM | 3247 | O  | WAT | 1338 | 13.873  | -11.404 | -0.188  | 0.00 | 0.00 | O |
| ATOM | 3248 | H1 | WAT | 1338 | 13.024  | -11.797 | -0.394  | 0.00 | 0.00 | H |
| ATOM | 3249 | H2 | WAT | 1338 | 14.341  | -11.393 | -1.021  | 0.00 | 0.00 | H |
| TER  | 3250 |    | WAT | 1338 |         |         |         |      |      |   |
| ATOM | 3251 | O  | WAT | 1348 | -9.239  | -5.765  | 22.627  | 0.00 | 0.00 | O |
| ATOM | 3252 | H1 | WAT | 1348 | -9.358  | -4.996  | 22.069  | 0.00 | 0.00 | H |
| ATOM | 3253 | H2 | WAT | 1348 | -8.757  | -5.437  | 23.385  | 0.00 | 0.00 | H |
| TER  | 3254 |    | WAT | 1348 |         |         |         |      |      |   |
| ATOM | 3255 | O  | WAT | 1393 | 10.983  | 8.257   | 10.743  | 0.00 | 0.00 | O |
| ATOM | 3256 | H1 | WAT | 1393 | 11.204  | 8.456   | 9.832   | 0.00 | 0.00 | H |
| ATOM | 3257 | H2 | WAT | 1393 | 11.603  | 7.574   | 10.996  | 0.00 | 0.00 | H |
| TER  | 3258 |    | WAT | 1393 |         |         |         |      |      |   |
| ATOM | 3259 | O  | WAT | 1406 | 18.716  | 15.071  | -12.679 | 0.00 | 0.00 | O |
| ATOM | 3260 | H1 | WAT | 1406 | 17.871  | 14.635  | -12.566 | 0.00 | 0.00 | H |
| ATOM | 3261 | H2 | WAT | 1406 | 18.676  | 15.829  | -12.097 | 0.00 | 0.00 | H |
| TER  | 3262 |    | WAT | 1406 |         |         |         |      |      |   |
| ATOM | 3263 | O  | WAT | 1485 | -9.923  | -18.319 | 6.196   | 0.00 | 0.00 | O |
| ATOM | 3264 | H1 | WAT | 1485 | -10.664 | -17.783 | 5.911   | 0.00 | 0.00 | H |
| ATOM | 3265 | H2 | WAT | 1485 | -9.380  | -18.413 | 5.413   | 0.00 | 0.00 | H |
| TER  | 3266 |    | WAT | 1485 |         |         |         |      |      |   |
| ATOM | 3267 | O  | WAT | 1490 | -20.504 | 2.226   | -4.431  | 0.00 | 0.00 | O |
| ATOM | 3268 | H1 | WAT | 1490 | -20.772 | 1.338   | -4.195  | 0.00 | 0.00 | H |
| ATOM | 3269 | H2 | WAT | 1490 | -19.649 | 2.117   | -4.845  | 0.00 | 0.00 | H |
| TER  | 3270 |    | WAT | 1490 |         |         |         |      |      |   |
| ATOM | 3271 | O  | WAT | 1499 | -8.695  | 14.619  | 7.384   | 0.00 | 0.00 | O |
| ATOM | 3272 | H1 | WAT | 1499 | -8.914  | 15.484  | 7.732   | 0.00 | 0.00 | H |
| ATOM | 3273 | H2 | WAT | 1499 | -7.777  | 14.490  | 7.626   | 0.00 | 0.00 | H |
| TER  | 3274 |    | WAT | 1499 |         |         |         |      |      |   |
| ATOM | 3275 | O  | WAT | 1533 | -3.006  | 4.214   | 18.808  | 0.00 | 0.00 | O |
| ATOM | 3276 | H1 | WAT | 1533 | -2.331  | 3.537   | 18.765  | 0.00 | 0.00 | H |
| ATOM | 3277 | H2 | WAT | 1533 | -3.574  | 3.943   | 19.530  | 0.00 | 0.00 | H |
| TER  | 3278 |    | WAT | 1533 |         |         |         |      |      |   |
| ATOM | 3279 | O  | WAT | 1635 | -15.724 | 3.758   | 4.806   | 0.00 | 0.00 | O |
| ATOM | 3280 | H1 | WAT | 1635 | -14.919 | 4.161   | 5.131   | 0.00 | 0.00 | H |
| ATOM | 3281 | H2 | WAT | 1635 | -15.441 | 3.224   | 4.063   | 0.00 | 0.00 | H |
| TER  | 3282 |    | WAT | 1635 |         |         |         |      |      |   |
| ATOM | 3283 | O  | WAT | 1647 | 5.387   | -20.960 | 3.454   | 0.00 | 0.00 | O |
| ATOM | 3284 | H1 | WAT | 1647 | 5.082   | -21.033 | 2.550   | 0.00 | 0.00 | H |
| ATOM | 3285 | H2 | WAT | 1647 | 4.877   | -21.612 | 3.933   | 0.00 | 0.00 | H |
| TER  | 3286 |    | WAT | 1647 |         |         |         |      |      |   |
| ATOM | 3287 | O  | WAT | 1654 | 10.931  | 15.779  | 9.278   | 0.00 | 0.00 | O |
| ATOM | 3288 | H1 | WAT | 1654 | 10.802  | 16.422  | 9.977   | 0.00 | 0.00 | H |
| ATOM | 3289 | H2 | WAT | 1654 | 11.544  | 15.142  | 9.647   | 0.00 | 0.00 | H |
| TER  | 3290 |    | WAT | 1654 |         |         |         |      |      |   |
| ATOM | 3291 | O  | WAT | 1698 | 1.793   | 21.132  | 4.641   | 0.00 | 0.00 | O |
| ATOM | 3292 | H1 | WAT | 1698 | 1.058   | 21.472  | 4.129   | 0.00 | 0.00 | H |
| ATOM | 3293 | H2 | WAT | 1698 | 2.134   | 21.895  | 5.108   | 0.00 | 0.00 | H |
| TER  | 3294 |    | WAT | 1698 |         |         |         |      |      |   |
| ATOM | 3295 | O  | WAT | 1716 | -8.625  | 2.327   | -16.125 | 0.00 | 0.00 | O |
| ATOM | 3296 | H1 | WAT | 1716 | -7.951  | 2.883   | -15.731 | 0.00 | 0.00 | H |
| ATOM | 3297 | H2 | WAT | 1716 | -8.876  | 1.723   | -15.426 | 0.00 | 0.00 | H |
| TER  | 3298 |    | WAT | 1716 |         |         |         |      |      |   |
| ATOM | 3299 | O  | WAT | 1724 | -6.837  | -14.783 | -9.628  | 0.00 | 0.00 | O |
| ATOM | 3300 | H1 | WAT | 1724 | -7.683  | -14.872 | -9.191  | 0.00 | 0.00 | H |
| ATOM | 3301 | H2 | WAT | 1724 | -7.057  | -14.560 | -10.534 | 0.00 | 0.00 | H |
| TER  | 3302 |    | WAT | 1724 |         |         |         |      |      |   |
| ATOM | 3303 | O  | WAT | 1729 | 18.847  | -18.616 | 6.015   | 0.00 | 0.00 | O |
| ATOM | 3304 | H1 | WAT | 1729 | 18.480  | -19.340 | 5.511   | 0.00 | 0.00 | H |
| ATOM | 3305 | H2 | WAT | 1729 | 18.188  | -18.431 | 6.684   | 0.00 | 0.00 | H |
| TER  | 3306 |    | WAT | 1729 |         |         |         |      |      |   |
| ATOM | 3307 | O  | WAT | 1743 | 4.608   | -7.591  | 8.595   | 0.00 | 0.00 | O |
| ATOM | 3308 | H1 | WAT | 1743 | 5.184   | -6.848  | 8.775   | 0.00 | 0.00 | H |
| ATOM | 3309 | H2 | WAT | 1743 | 4.515   | -8.030  | 9.441   | 0.00 | 0.00 | H |
| TER  | 3310 |    | WAT | 1743 |         |         |         |      |      |   |
| ATOM | 3311 | O  | WAT | 1757 | 4.262   | -12.289 | 13.402  | 0.00 | 0.00 | O |
| ATOM | 3312 | H1 | WAT | 1757 | 4.064   | -12.037 | 12.500  | 0.00 | 0.00 | H |
| ATOM | 3313 | H2 | WAT | 1757 | 5.132   | -11.925 | 13.568  | 0.00 | 0.00 | H |
| TER  | 3314 |    | WAT | 1757 |         |         |         |      |      |   |
| ATOM | 3315 | O  | WAT | 1771 | -9.855  | -14.788 | 8.532   | 0.00 | 0.00 | O |
| ATOM | 3316 | H1 | WAT | 1771 | -9.729  | -15.631 | 8.968   | 0.00 | 0.00 | H |
| ATOM | 3317 | H2 | WAT | 1771 | -10.765 | -14.803 | 8.239   | 0.00 | 0.00 | H |
| TER  | 3318 |    | WAT | 1771 |         |         |         |      |      |   |
| ATOM | 3319 | O  | WAT | 1777 | 1.349   | -18.287 | 7.212   | 0.00 | 0.00 | O |
| ATOM | 3320 | H1 | WAT | 1777 | 0.519   | -18.440 | 6.762   | 0.00 | 0.00 | H |
| ATOM | 3321 | H2 | WAT | 1777 | 1.974   | -18.111 | 6.509   | 0.00 | 0.00 | H |
| TER  | 3322 |    | WAT | 1777 |         |         |         |      |      |   |
| ATOM | 3323 | O  | WAT | 1792 | -16.435 | -7.435  | 7.225   | 0.00 | 0.00 | O |
| ATOM | 3324 | H1 | WAT | 1792 | -16.246 | -6.511  | 7.063   | 0.00 | 0.00 | H |
| ATOM | 3325 | H2 | WAT | 1792 | -16.095 | -7.888  | 6.454   | 0.00 | 0.00 | H |
| TER  | 3326 |    | WAT | 1792 |         |         |         |      |      |   |
| ATOM | 3327 | O  | WAT | 1800 | -4.413  | -3.716  | -19.243 | 0.00 | 0.00 | O |
| ATOM | 3328 | H1 | WAT | 1800 | -5.257  | -3.388  | -19.549 | 0.00 | 0.00 | H |
| ATOM | 3329 | H2 | WAT | 1800 | -3.862  | -3.728  | -20.027 | 0.00 | 0.00 | H |
| TER  | 3330 |    | WAT | 1800 |         |         |         |      |      |   |
| ATOM | 3331 | O  | WAT | 1807 | 12.758  | 2.219   | 14.867  | 0.00 | 0.00 | O |
| ATOM | 3332 | H1 | WAT | 1807 | 12.978  | 2.633   | 15.701  | 0.00 | 0.00 | H |
| ATOM | 3333 | H2 | WAT | 1807 | 12.104  | 1.558   | 15.093  | 0.00 | 0.00 | H |

|      |      |     |      |      |         |         |         |      |      |   |
|------|------|-----|------|------|---------|---------|---------|------|------|---|
| TER  | 3334 | WAT | 1807 |      |         |         |         |      |      |   |
| ATOM | 3335 | O   | WAT  | 1810 | 13.067  | -18.827 | -6.307  | 0.00 | 0.00 | O |
| ATOM | 3336 | H1  | WAT  | 1810 | 12.158  | -18.696 | -6.577  | 0.00 | 0.00 | H |
| ATOM | 3337 | H2  | WAT  | 1810 | 13.454  | -17.952 | -6.334  | 0.00 | 0.00 | H |
| TER  | 3338 | WAT | 1810 |      |         |         |         |      |      |   |
| ATOM | 3339 | O   | WAT  | 1828 | 19.657  | 4.704   | -6.904  | 0.00 | 0.00 | O |
| ATOM | 3340 | H1  | WAT  | 1828 | 19.553  | 4.008   | -6.253  | 0.00 | 0.00 | H |
| ATOM | 3341 | H2  | WAT  | 1828 | 20.551  | 4.595   | -7.230  | 0.00 | 0.00 | H |
| TER  | 3342 | WAT | 1828 |      |         |         |         |      |      |   |
| ATOM | 3343 | O   | WAT  | 1867 | -9.096  | 6.619   | -15.584 | 0.00 | 0.00 | O |
| ATOM | 3344 | H1  | WAT  | 1867 | -8.940  | 7.336   | -16.200 | 0.00 | 0.00 | H |
| ATOM | 3345 | H2  | WAT  | 1867 | -10.041 | 6.633   | -15.436 | 0.00 | 0.00 | H |
| TER  | 3346 | WAT | 1867 |      |         |         |         |      |      |   |
| ATOM | 3347 | O   | WAT  | 1869 | -3.265  | 4.483   | -16.167 | 0.00 | 0.00 | O |
| ATOM | 3348 | H1  | WAT  | 1869 | -3.768  | 5.297   | -16.181 | 0.00 | 0.00 | H |
| ATOM | 3349 | H2  | WAT  | 1869 | -3.510  | 4.036   | -16.977 | 0.00 | 0.00 | H |
| TER  | 3350 | WAT | 1869 |      |         |         |         |      |      |   |
| ATOM | 3351 | O   | WAT  | 1892 | -10.962 | -4.826  | -8.743  | 0.00 | 0.00 | O |
| ATOM | 3352 | H1  | WAT  | 1892 | -10.486 | -4.043  | -9.019  | 0.00 | 0.00 | H |
| ATOM | 3353 | H2  | WAT  | 1892 | -10.366 | -5.549  | -8.941  | 0.00 | 0.00 | H |
| TER  | 3354 | WAT | 1892 |      |         |         |         |      |      |   |
| ATOM | 3355 | O   | WAT  | 1908 | 11.867  | -9.168  | -8.082  | 0.00 | 0.00 | O |
| ATOM | 3356 | H1  | WAT  | 1908 | 12.417  | -9.577  | -8.750  | 0.00 | 0.00 | H |
| ATOM | 3357 | H2  | WAT  | 1908 | 10.971  | -9.318  | -8.383  | 0.00 | 0.00 | H |
| TER  | 3358 | WAT | 1908 |      |         |         |         |      |      |   |
| ATOM | 3359 | O   | WAT  | 1933 | 0.250   | 15.443  | -11.558 | 0.00 | 0.00 | O |
| ATOM | 3360 | H1  | WAT  | 1933 | 0.282   | 16.123  | -12.231 | 0.00 | 0.00 | H |
| ATOM | 3361 | H2  | WAT  | 1933 | 0.045   | 15.916  | -10.751 | 0.00 | 0.00 | H |
| TER  | 3362 | WAT | 1933 |      |         |         |         |      |      |   |
| ATOM | 3363 | O   | WAT  | 1945 | -7.241  | -23.465 | 2.568   | 0.00 | 0.00 | O |
| ATOM | 3364 | H1  | WAT  | 1945 | -7.890  | -22.830 | 2.869   | 0.00 | 0.00 | H |
| ATOM | 3365 | H2  | WAT  | 1945 | -7.548  | -23.728 | 1.700   | 0.00 | 0.00 | H |
| TER  | 3366 | WAT | 1945 |      |         |         |         |      |      |   |
| ATOM | 3367 | O   | WAT  | 1947 | -12.402 | 9.463   | -5.065  | 0.00 | 0.00 | O |
| ATOM | 3368 | H1  | WAT  | 1947 | -12.712 | 8.961   | -4.313  | 0.00 | 0.00 | H |
| ATOM | 3369 | H2  | WAT  | 1947 | -13.193 | 9.858   | -5.434  | 0.00 | 0.00 | H |
| TER  | 3370 | WAT | 1947 |      |         |         |         |      |      |   |
| ATOM | 3371 | O   | WAT  | 1954 | 1.625   | -13.194 | 17.462  | 0.00 | 0.00 | O |
| ATOM | 3372 | H1  | WAT  | 1954 | 2.250   | -13.810 | 17.842  | 0.00 | 0.00 | H |
| ATOM | 3373 | H2  | WAT  | 1954 | 0.775   | -13.477 | 17.799  | 0.00 | 0.00 | H |
| TER  | 3374 | WAT | 1954 |      |         |         |         |      |      |   |
| ATOM | 3375 | O   | WAT  | 1991 | 12.445  | -22.156 | -5.024  | 0.00 | 0.00 | O |
| ATOM | 3376 | H1  | WAT  | 1991 | 12.448  | -23.109 | -4.937  | 0.00 | 0.00 | H |
| ATOM | 3377 | H2  | WAT  | 1991 | 11.565  | -21.894 | -4.750  | 0.00 | 0.00 | H |
| ATOM | 3378 | O   | WAT  | 1992 | -0.899  | 16.549  | 6.602   | 0.00 | 0.00 | O |
| ATOM | 3379 | H1  | WAT  | 1992 | -1.059  | 15.609  | 6.688   | 0.00 | 0.00 | H |
| ATOM | 3380 | H2  | WAT  | 1992 | -1.667  | 16.960  | 6.999   | 0.00 | 0.00 | H |
| TER  | 3381 | WAT | 1992 |      |         |         |         |      |      |   |
| ATOM | 3382 | O   | WAT  | 2001 | 5.448   | -18.811 | -2.713  | 0.00 | 0.00 | O |
| ATOM | 3383 | H1  | WAT  | 2001 | 5.086   | -19.401 | -3.374  | 0.00 | 0.00 | H |
| ATOM | 3384 | H2  | WAT  | 2001 | 6.386   | -19.007 | -2.706  | 0.00 | 0.00 | H |
| TER  | 3385 | WAT | 2001 |      |         |         |         |      |      |   |
| ATOM | 3386 | O   | WAT  | 2013 | -18.024 | 0.138   | -14.698 | 0.00 | 0.00 | O |
| ATOM | 3387 | H1  | WAT  | 2013 | -18.197 | 0.408   | -15.466 | 0.00 | 0.00 | H |
| ATOM | 3388 | H2  | WAT  | 2013 | -17.074 | 0.266   | -14.706 | 0.00 | 0.00 | H |
| ATOM | 3389 | O   | WAT  | 2014 | 16.800  | -12.668 | 1.192   | 0.00 | 0.00 | O |
| ATOM | 3390 | H1  | WAT  | 2014 | 17.226  | -13.482 | 1.461   | 0.00 | 0.00 | H |
| ATOM | 3391 | H2  | WAT  | 2014 | 17.030  | -12.572 | 0.268   | 0.00 | 0.00 | H |
| TER  | 3392 | WAT | 2014 |      |         |         |         |      |      |   |
| ATOM | 3393 | O   | WAT  | 2043 | 11.496  | 7.826   | -18.318 | 0.00 | 0.00 | O |
| ATOM | 3394 | H1  | WAT  | 2043 | 10.548  | 7.693   | -18.330 | 0.00 | 0.00 | H |
| ATOM | 3395 | H2  | WAT  | 2043 | 11.658  | 8.458   | -19.017 | 0.00 | 0.00 | H |
| TER  | 3396 | WAT | 2043 |      |         |         |         |      |      |   |
| ATOM | 3397 | O   | WAT  | 2060 | 5.342   | -3.505  | -22.085 | 0.00 | 0.00 | O |
| ATOM | 3398 | H1  | WAT  | 2060 | 6.258   | -3.495  | -21.805 | 0.00 | 0.00 | H |
| ATOM | 3399 | H2  | WAT  | 2060 | 5.047   | -2.602  | -21.969 | 0.00 | 0.00 | H |
| TER  | 3400 | WAT | 2060 |      |         |         |         |      |      |   |
| ATOM | 3401 | O   | WAT  | 2083 | 8.730   | 7.508   | -17.809 | 0.00 | 0.00 | O |
| ATOM | 3402 | H1  | WAT  | 2083 | 7.832   | 7.384   | -18.114 | 0.00 | 0.00 | H |
| ATOM | 3403 | H2  | WAT  | 2083 | 8.652   | 7.586   | -16.858 | 0.00 | 0.00 | H |
| TER  | 3404 | WAT | 2083 |      |         |         |         |      |      |   |
| ATOM | 3405 | O   | WAT  | 2113 | 10.356  | -6.990  | 9.315   | 0.00 | 0.00 | O |
| ATOM | 3406 | H1  | WAT  | 2113 | 10.515  | -6.375  | 8.601   | 0.00 | 0.00 | H |
| ATOM | 3407 | H2  | WAT  | 2113 | 11.188  | -7.031  | 9.787   | 0.00 | 0.00 | H |
| TER  | 3408 | WAT | 2113 |      |         |         |         |      |      |   |
| ATOM | 3409 | O   | WAT  | 2145 | -16.467 | -0.799  | 0.085   | 0.00 | 0.00 | O |
| ATOM | 3410 | H1  | WAT  | 2145 | -17.279 | -0.751  | -0.417  | 0.00 | 0.00 | H |
| ATOM | 3411 | H2  | WAT  | 2145 | -16.284 | 0.106   | 0.333   | 0.00 | 0.00 | H |
| TER  | 3412 | WAT | 2145 |      |         |         |         |      |      |   |
| ATOM | 3413 | O   | WAT  | 2172 | 5.923   | 18.494  | 0.218   | 0.00 | 0.00 | O |
| ATOM | 3414 | H1  | WAT  | 2172 | 5.888   | 17.613  | 0.593   | 0.00 | 0.00 | H |
| ATOM | 3415 | H2  | WAT  | 2172 | 6.477   | 18.989  | 0.822   | 0.00 | 0.00 | H |
| TER  | 3416 | WAT | 2172 |      |         |         |         |      |      |   |
| ATOM | 3417 | O   | WAT  | 2181 | 11.334  | 13.238  | 5.281   | 0.00 | 0.00 | O |
| ATOM | 3418 | H1  | WAT  | 2181 | 10.519  | 13.331  | 4.789   | 0.00 | 0.00 | H |
| ATOM | 3419 | H2  | WAT  | 2181 | 11.530  | 14.122  | 5.591   | 0.00 | 0.00 | H |
| TER  | 3420 | WAT | 2181 |      |         |         |         |      |      |   |
| ATOM | 3421 | O   | WAT  | 2193 | 4.926   | 10.197  | -19.251 | 0.00 | 0.00 | O |
| ATOM | 3422 | H1  | WAT  | 2193 | 5.758   | 10.572  | -18.965 | 0.00 | 0.00 | H |
| ATOM | 3423 | H2  | WAT  | 2193 | 5.043   | 9.252   | -19.156 | 0.00 | 0.00 | H |
| TER  | 3424 | WAT | 2193 |      |         |         |         |      |      |   |
| ATOM | 3425 | O   | WAT  | 2210 | 3.453   | 12.002  | 20.455  | 0.00 | 0.00 | O |
| ATOM | 3426 | H1  | WAT  | 2210 | 4.082   | 12.025  | 19.735  | 0.00 | 0.00 | H |
| ATOM | 3427 | H2  | WAT  | 2210 | 2.832   | 12.703  | 20.253  | 0.00 | 0.00 | H |
| ATOM | 3428 | O   | WAT  | 2211 | -12.312 | -0.031  | 14.125  | 0.00 | 0.00 | O |
| ATOM | 3429 | H1  | WAT  | 2211 | -11.500 | -0.528  | 14.035  | 0.00 | 0.00 | H |
| ATOM | 3430 | H2  | WAT  | 2211 | -12.112 | 0.827   | 13.752  | 0.00 | 0.00 | H |
| TER  | 3431 | WAT | 2211 |      |         |         |         |      |      |   |
| ATOM | 3432 | O   | WAT  | 2224 | 8.033   | -15.197 | 5.033   | 0.00 | 0.00 | O |
| ATOM | 3433 | H1  | WAT  | 2224 | 7.952   | -16.059 | 4.624   | 0.00 | 0.00 | H |
| ATOM | 3434 | H2  | WAT  | 2224 | 7.258   | -14.719 | 4.741   | 0.00 | 0.00 | H |
| TER  | 3435 | WAT | 2224 |      |         |         |         |      |      |   |
| ATOM | 3436 | O   | WAT  | 2243 | -9.855  | 14.372  | -0.231  | 0.00 | 0.00 | O |
| ATOM | 3437 | H1  | WAT  | 2243 | -9.177  | 14.718  | -0.810  | 0.00 | 0.00 | H |
| ATOM | 3438 | H2  | WAT  | 2243 | -9.829  | 13.426  | -0.369  | 0.00 | 0.00 | H |



|      |      |    |     |      |         |         |         |      |      |   |
|------|------|----|-----|------|---------|---------|---------|------|------|---|
| ATOM | 3544 | O  | WAT | 2813 | 6.643   | 13.430  | 20.633  | 0.00 | 0.00 | O |
| ATOM | 3545 | H1 | WAT | 2813 | 6.492   | 13.079  | 19.756  | 0.00 | 0.00 | H |
| ATOM | 3546 | H2 | WAT | 2813 | 6.080   | 12.905  | 21.202  | 0.00 | 0.00 | H |
| TER  | 3547 |    | WAT | 2813 |         |         |         |      |      |   |
| ATOM | 3548 | O  | WAT | 2822 | 16.740  | -0.906  | 10.453  | 0.00 | 0.00 | O |
| ATOM | 3549 | H1 | WAT | 2822 | 17.325  | -0.199  | 10.724  | 0.00 | 0.00 | H |
| ATOM | 3550 | H2 | WAT | 2822 | 17.117  | -1.694  | 10.846  | 0.00 | 0.00 | H |
| TER  | 3551 |    | WAT | 2822 |         |         |         |      |      |   |
| ATOM | 3552 | O  | WAT | 2872 | 12.994  | -11.308 | 3.689   | 0.00 | 0.00 | O |
| ATOM | 3553 | H1 | WAT | 2872 | 13.883  | -11.482 | 3.379   | 0.00 | 0.00 | H |
| ATOM | 3554 | H2 | WAT | 2872 | 12.521  | -12.125 | 3.528   | 0.00 | 0.00 | H |
| TER  | 3555 |    | WAT | 2872 |         |         |         |      |      |   |
| ATOM | 3556 | O  | WAT | 2889 | -7.216  | 15.463  | 10.261  | 0.00 | 0.00 | O |
| ATOM | 3557 | H1 | WAT | 2889 | -7.212  | 15.002  | 11.100  | 0.00 | 0.00 | H |
| ATOM | 3558 | H2 | WAT | 2889 | -6.962  | 14.797  | 9.621   | 0.00 | 0.00 | H |
| TER  | 3559 |    | WAT | 2889 |         |         |         |      |      |   |
| ATOM | 3560 | O  | WAT | 2895 | -13.463 | 17.226  | -6.713  | 0.00 | 0.00 | O |
| ATOM | 3561 | H1 | WAT | 2895 | -12.623 | 17.550  | -7.035  | 0.00 | 0.00 | H |
| ATOM | 3562 | H2 | WAT | 2895 | -13.763 | 17.901  | -6.104  | 0.00 | 0.00 | H |
| TER  | 3563 |    | WAT | 2895 |         |         |         |      |      |   |
| ATOM | 3564 | O  | WAT | 2914 | -14.964 | -0.070  | -14.386 | 0.00 | 0.00 | O |
| ATOM | 3565 | H1 | WAT | 2914 | -15.217 | -0.650  | -15.104 | 0.00 | 0.00 | H |
| ATOM | 3566 | H2 | WAT | 2914 | -14.009 | -0.038  | -14.428 | 0.00 | 0.00 | H |
| TER  | 3567 |    | WAT | 2914 |         |         |         |      |      |   |
| ATOM | 3568 | O  | WAT | 2925 | 8.149   | -4.283  | 2.037   | 0.00 | 0.00 | O |
| ATOM | 3569 | H1 | WAT | 2925 | 8.794   | -4.084  | 2.715   | 0.00 | 0.00 | H |
| ATOM | 3570 | H2 | WAT | 2925 | 7.377   | -3.772  | 2.285   | 0.00 | 0.00 | H |
| TER  | 3571 |    | WAT | 2925 |         |         |         |      |      |   |
| ATOM | 3572 | O  | WAT | 2934 | 13.244  | 8.106   | 8.723   | 0.00 | 0.00 | O |
| ATOM | 3573 | H1 | WAT | 2934 | 14.167  | 8.186   | 8.966   | 0.00 | 0.00 | H |
| ATOM | 3574 | H2 | WAT | 2934 | 12.997  | 7.224   | 9.000   | 0.00 | 0.00 | H |
| TER  | 3575 |    | WAT | 2934 |         |         |         |      |      |   |
| ATOM | 3576 | O  | WAT | 2989 | 11.658  | -9.048  | 4.700   | 0.00 | 0.00 | O |
| ATOM | 3577 | H1 | WAT | 2989 | 12.097  | -9.801  | 4.303   | 0.00 | 0.00 | H |
| ATOM | 3578 | H2 | WAT | 2989 | 11.002  | -8.785  | 4.055   | 0.00 | 0.00 | H |
| TER  | 3579 |    | WAT | 2989 |         |         |         |      |      |   |
| ATOM | 3580 | O  | WAT | 3000 | 6.564   | 0.027   | 21.693  | 0.00 | 0.00 | O |
| ATOM | 3581 | H1 | WAT | 3000 | 6.901   | -0.223  | 20.832  | 0.00 | 0.00 | H |
| ATOM | 3582 | H2 | WAT | 3000 | 5.615   | -0.064  | 21.613  | 0.00 | 0.00 | H |
| TER  | 3583 |    | WAT | 3000 |         |         |         |      |      |   |
| ATOM | 3584 | O  | WAT | 3029 | 17.975  | 2.070   | -1.629  | 0.00 | 0.00 | O |
| ATOM | 3585 | H1 | WAT | 3029 | 17.901  | 1.130   | -1.792  | 0.00 | 0.00 | H |
| ATOM | 3586 | H2 | WAT | 3029 | 17.777  | 2.475   | -2.473  | 0.00 | 0.00 | H |
| ATOM | 3587 | O  | WAT | 3030 | 16.278  | -13.478 | -6.732  | 0.00 | 0.00 | O |
| ATOM | 3588 | H1 | WAT | 3030 | 15.555  | -13.889 | -6.259  | 0.00 | 0.00 | H |
| ATOM | 3589 | H2 | WAT | 3030 | 17.011  | -14.083 | -6.623  | 0.00 | 0.00 | H |
| TER  | 3590 |    | WAT | 3030 |         |         |         |      |      |   |
| ATOM | 3591 | O  | WAT | 3035 | 13.518  | -17.700 | 5.039   | 0.00 | 0.00 | O |
| ATOM | 3592 | H1 | WAT | 3035 | 14.032  | -17.023 | 5.481   | 0.00 | 0.00 | H |
| ATOM | 3593 | H2 | WAT | 3035 | 12.769  | -17.232 | 4.672   | 0.00 | 0.00 | H |
| TER  | 3594 |    | WAT | 3035 |         |         |         |      |      |   |
| ATOM | 3595 | O  | WAT | 3047 | 18.183  | -21.755 | 6.090   | 0.00 | 0.00 | O |
| ATOM | 3596 | H1 | WAT | 3047 | 17.785  | -22.622 | 6.015   | 0.00 | 0.00 | H |
| ATOM | 3597 | H2 | WAT | 3047 | 17.881  | -21.284 | 5.313   | 0.00 | 0.00 | H |
| TER  | 3598 |    | WAT | 3047 |         |         |         |      |      |   |
| ATOM | 3599 | O  | WAT | 3059 | -4.303  | 18.442  | 0.851   | 0.00 | 0.00 | O |
| ATOM | 3600 | H1 | WAT | 3059 | -4.030  | 19.291  | 1.199   | 0.00 | 0.00 | H |
| ATOM | 3601 | H2 | WAT | 3059 | -3.859  | 17.801  | 1.405   | 0.00 | 0.00 | H |
| TER  | 3602 |    | WAT | 3059 |         |         |         |      |      |   |
| ATOM | 3603 | O  | WAT | 3063 | 10.127  | 5.976   | 7.833   | 0.00 | 0.00 | O |
| ATOM | 3604 | H1 | WAT | 3063 | 10.084  | 5.153   | 7.347   | 0.00 | 0.00 | H |
| ATOM | 3605 | H2 | WAT | 3063 | 10.993  | 5.969   | 8.237   | 0.00 | 0.00 | H |
| TER  | 3606 |    | WAT | 3063 |         |         |         |      |      |   |
| ATOM | 3607 | O  | WAT | 3107 | -0.643  | 3.617   | 20.793  | 0.00 | 0.00 | O |
| ATOM | 3608 | H1 | WAT | 3107 | -1.187  | 3.018   | 20.280  | 0.00 | 0.00 | H |
| ATOM | 3609 | H2 | WAT | 3107 | -0.264  | 3.069   | 21.479  | 0.00 | 0.00 | H |
| TER  | 3610 |    | WAT | 3107 |         |         |         |      |      |   |
| ATOM | 3611 | O  | WAT | 3150 | 8.941   | -6.965  | -10.318 | 0.00 | 0.00 | O |
| ATOM | 3612 | H1 | WAT | 3150 | 8.520   | -6.115  | -10.446 | 0.00 | 0.00 | H |
| ATOM | 3613 | H2 | WAT | 3150 | 9.273   | -7.200  | -11.185 | 0.00 | 0.00 | H |
| TER  | 3614 |    | WAT | 3150 |         |         |         |      |      |   |
| ATOM | 3615 | O  | WAT | 3189 | -4.618  | -8.123  | -9.540  | 0.00 | 0.00 | O |
| ATOM | 3616 | H1 | WAT | 3189 | -4.332  | -7.341  | -10.014 | 0.00 | 0.00 | H |
| ATOM | 3617 | H2 | WAT | 3189 | -5.547  | -7.968  | -9.364  | 0.00 | 0.00 | H |
| TER  | 3618 |    | WAT | 3189 |         |         |         |      |      |   |
| ATOM | 3619 | O  | WAT | 3191 | 13.938  | -3.739  | -5.578  | 0.00 | 0.00 | O |
| ATOM | 3620 | H1 | WAT | 3191 | 13.793  | -3.645  | -6.519  | 0.00 | 0.00 | H |
| ATOM | 3621 | H2 | WAT | 3191 | 14.385  | -4.580  | -5.487  | 0.00 | 0.00 | H |
| TER  | 3622 |    | WAT | 3191 |         |         |         |      |      |   |
| ATOM | 3623 | O  | WAT | 3227 | -13.342 | -3.632  | 18.360  | 0.00 | 0.00 | O |
| ATOM | 3624 | H1 | WAT | 3227 | -12.651 | -3.536  | 17.704  | 0.00 | 0.00 | H |
| ATOM | 3625 | H2 | WAT | 3227 | -13.710 | -2.754  | 18.451  | 0.00 | 0.00 | H |
| TER  | 3626 |    | WAT | 3227 |         |         |         |      |      |   |
| ATOM | 3627 | O  | WAT | 3247 | -15.966 | 1.206   | -19.119 | 0.00 | 0.00 | O |
| ATOM | 3628 | H1 | WAT | 3247 | -15.924 | 2.159   | -19.032 | 0.00 | 0.00 | H |
| ATOM | 3629 | H2 | WAT | 3247 | -15.253 | 0.988   | -19.720 | 0.00 | 0.00 | H |
| TER  | 3630 |    | WAT | 3247 |         |         |         |      |      |   |
| ATOM | 3631 | O  | WAT | 3251 | -12.450 | 5.283   | 8.054   | 0.00 | 0.00 | O |
| ATOM | 3632 | H1 | WAT | 3251 | -13.044 | 5.137   | 8.791   | 0.00 | 0.00 | H |
| ATOM | 3633 | H2 | WAT | 3251 | -11.579 | 5.096   | 8.406   | 0.00 | 0.00 | H |
| TER  | 3634 |    | WAT | 3251 |         |         |         |      |      |   |
| ATOM | 3635 | O  | WAT | 3262 | 8.595   | -0.728  | 2.420   | 0.00 | 0.00 | O |
| ATOM | 3636 | H1 | WAT | 3262 | 9.292   | -0.182  | 2.054   | 0.00 | 0.00 | H |
| ATOM | 3637 | H2 | WAT | 3262 | 8.409   | -0.337  | 3.275   | 0.00 | 0.00 | H |
| TER  | 3638 |    | WAT | 3262 |         |         |         |      |      |   |
| ATOM | 3639 | O  | WAT | 3282 | 14.871  | -24.414 | -0.584  | 0.00 | 0.00 | O |
| ATOM | 3640 | H1 | WAT | 3282 | 14.919  | -24.263 | -1.528  | 0.00 | 0.00 | H |
| ATOM | 3641 | H2 | WAT | 3282 | 15.376  | -25.214 | -0.443  | 0.00 | 0.00 | H |
| TER  | 3642 |    | WAT | 3282 |         |         |         |      |      |   |
| ATOM | 3643 | O  | WAT | 3324 | -0.225  | 13.383  | 24.676  | 0.00 | 0.00 | O |
| ATOM | 3644 | H1 | WAT | 3324 | -0.536  | 14.060  | 25.277  | 0.00 | 0.00 | H |
| ATOM | 3645 | H2 | WAT | 3324 | -0.691  | 13.556  | 23.858  | 0.00 | 0.00 | H |
| TER  | 3646 |    | WAT | 3324 |         |         |         |      |      |   |
| ATOM | 3647 | O  | WAT | 3335 | -8.413  | -13.906 | 0.263   | 0.00 | 0.00 | O |
| ATOM | 3648 | H1 | WAT | 3335 | -8.066  | -13.791 | 1.149   | 0.00 | 0.00 | H |

|      |      |    |     |      |         |         |         |      |      |   |
|------|------|----|-----|------|---------|---------|---------|------|------|---|
| ATOM | 3649 | H2 | WAT | 3335 | -7.910  | -14.635 | -0.098  | 0.00 | 0.00 | H |
| TER  | 3650 |    | WAT | 3335 |         |         |         |      |      |   |
| ATOM | 3651 | 0  | WAT | 3364 | 5.751   | 15.964  | 5.448   | 0.00 | 0.00 | O |
| ATOM | 3652 | H1 | WAT | 3364 | 6.048   | 15.594  | 4.616   | 0.00 | 0.00 | H |
| ATOM | 3653 | H2 | WAT | 3364 | 6.372   | 16.668  | 5.631   | 0.00 | 0.00 | H |
| TER  | 3654 |    | WAT | 3364 |         |         |         |      |      |   |
| ATOM | 3655 | 0  | WAT | 3368 | 16.865  | 7.322   | 1.549   | 0.00 | 0.00 | O |
| ATOM | 3656 | H1 | WAT | 3368 | 17.477  | 8.056   | 1.479   | 0.00 | 0.00 | H |
| ATOM | 3657 | H2 | WAT | 3368 | 16.366  | 7.347   | 0.732   | 0.00 | 0.00 | H |
| TER  | 3658 |    | WAT | 3368 |         |         |         |      |      |   |
| ATOM | 3659 | 0  | WAT | 3392 | 0.246   | -21.783 | 8.007   | 0.00 | 0.00 | O |
| ATOM | 3660 | H1 | WAT | 3392 | -0.314  | -21.783 | 7.231   | 0.00 | 0.00 | H |
| ATOM | 3661 | H2 | WAT | 3392 | -0.103  | -21.078 | 8.553   | 0.00 | 0.00 | H |
| TER  | 3662 |    | WAT | 3392 |         |         |         |      |      |   |
| ATOM | 3663 | 0  | WAT | 3440 | -1.125  | 23.236  | 1.933   | 0.00 | 0.00 | O |
| ATOM | 3664 | H1 | WAT | 3440 | -0.685  | 22.399  | 1.780   | 0.00 | 0.00 | H |
| ATOM | 3665 | H2 | WAT | 3440 | -1.718  | 23.065  | 2.665   | 0.00 | 0.00 | H |
| TER  | 3666 |    | WAT | 3440 |         |         |         |      |      |   |
| ATOM | 3667 | 0  | WAT | 3444 | -17.589 | 5.603   | -17.237 | 0.00 | 0.00 | O |
| ATOM | 3668 | H1 | WAT | 3444 | -18.407 | 5.333   | -16.817 | 0.00 | 0.00 | H |
| ATOM | 3669 | H2 | WAT | 3444 | -16.901 | 5.229   | -16.685 | 0.00 | 0.00 | H |
| TER  | 3670 |    | WAT | 3444 |         |         |         |      |      |   |
| ATOM | 3671 | 0  | WAT | 3446 | -6.829  | -13.094 | 16.834  | 0.00 | 0.00 | O |
| ATOM | 3672 | H1 | WAT | 3446 | -6.589  | -13.430 | 15.970  | 0.00 | 0.00 | H |
| ATOM | 3673 | H2 | WAT | 3446 | -7.224  | -13.845 | 17.281  | 0.00 | 0.00 | H |
| TER  | 3674 |    | WAT | 3446 |         |         |         |      |      |   |
| ATOM | 3675 | 0  | WAT | 3473 | -11.251 | -6.755  | -11.781 | 0.00 | 0.00 | O |
| ATOM | 3676 | H1 | WAT | 3473 | -10.601 | -6.764  | -11.077 | 0.00 | 0.00 | H |
| ATOM | 3677 | H2 | WAT | 3473 | -11.941 | -7.345  | -11.476 | 0.00 | 0.00 | H |
| TER  | 3678 |    | WAT | 3473 |         |         |         |      |      |   |
| ATOM | 3679 | 0  | WAT | 3504 | 12.872  | -12.185 | -6.307  | 0.00 | 0.00 | O |
| ATOM | 3680 | H1 | WAT | 3504 | 13.609  | -12.258 | -6.914  | 0.00 | 0.00 | H |
| ATOM | 3681 | H2 | WAT | 3504 | 13.092  | -12.782 | -5.590  | 0.00 | 0.00 | H |
| TER  | 3682 |    | WAT | 3504 |         |         |         |      |      |   |
| ATOM | 3683 | 0  | WAT | 3575 | 13.957  | -4.776  | 12.065  | 0.00 | 0.00 | O |
| ATOM | 3684 | H1 | WAT | 3575 | 13.022  | -4.822  | 12.263  | 0.00 | 0.00 | H |
| ATOM | 3685 | H2 | WAT | 3575 | 14.195  | -5.671  | 11.827  | 0.00 | 0.00 | H |
| TER  | 3686 |    | WAT | 3575 |         |         |         |      |      |   |
| ATOM | 3687 | 0  | WAT | 3612 | -3.896  | -6.773  | -11.833 | 0.00 | 0.00 | O |
| ATOM | 3688 | H1 | WAT | 3612 | -4.389  | -6.231  | -12.448 | 0.00 | 0.00 | H |
| ATOM | 3689 | H2 | WAT | 3612 | -3.402  | -7.376  | -12.388 | 0.00 | 0.00 | H |
| TER  | 3690 |    | WAT | 3612 |         |         |         |      |      |   |
| ATOM | 3691 | 0  | WAT | 3626 | -13.719 | -4.501  | 4.685   | 0.00 | 0.00 | O |
| ATOM | 3692 | H1 | WAT | 3626 | -14.205 | -5.295  | 4.911   | 0.00 | 0.00 | H |
| ATOM | 3693 | H2 | WAT | 3626 | -12.830 | -4.669  | 4.995   | 0.00 | 0.00 | H |
| ATOM | 3694 | 0  | WAT | 3627 | -5.643  | 21.492  | 7.719   | 0.00 | 0.00 | O |
| ATOM | 3695 | H1 | WAT | 3627 | -6.077  | 21.790  | 8.517   | 0.00 | 0.00 | H |
| ATOM | 3696 | H2 | WAT | 3627 | -5.400  | 20.583  | 7.900   | 0.00 | 0.00 | H |
| TER  | 3697 |    | WAT | 3627 |         |         |         |      |      |   |
| ATOM | 3698 | 0  | WAT | 3673 | 4.961   | 14.601  | -8.091  | 0.00 | 0.00 | O |
| ATOM | 3699 | H1 | WAT | 3673 | 5.305   | 13.799  | -7.698  | 0.00 | 0.00 | H |
| ATOM | 3700 | H2 | WAT | 3673 | 5.596   | 14.828  | -8.769  | 0.00 | 0.00 | H |
| TER  | 3701 |    | WAT | 3673 |         |         |         |      |      |   |
| ATOM | 3702 | 0  | WAT | 3698 | -10.881 | -20.246 | 2.856   | 0.00 | 0.00 | O |
| ATOM | 3703 | H1 | WAT | 3698 | -11.495 | -20.074 | 3.570   | 0.00 | 0.00 | H |
| ATOM | 3704 | H2 | WAT | 3698 | -10.024 | -20.015 | 3.216   | 0.00 | 0.00 | H |
| TER  | 3705 |    | WAT | 3698 |         |         |         |      |      |   |
| ATOM | 3706 | 0  | WAT | 3711 | -11.477 | -11.307 | 3.793   | 0.00 | 0.00 | O |
| ATOM | 3707 | H1 | WAT | 3711 | -12.210 | -11.809 | 3.438   | 0.00 | 0.00 | H |
| ATOM | 3708 | H2 | WAT | 3711 | -10.777 | -11.950 | 3.906   | 0.00 | 0.00 | H |
| TER  | 3709 |    | WAT | 3711 |         |         |         |      |      |   |
| ATOM | 3710 | 0  | WAT | 3746 | 8.835   | -11.344 | -7.098  | 0.00 | 0.00 | O |
| ATOM | 3711 | H1 | WAT | 3746 | 9.099   | -10.829 | -7.860  | 0.00 | 0.00 | H |
| ATOM | 3712 | H2 | WAT | 3746 | 8.403   | -10.715 | -6.520  | 0.00 | 0.00 | H |
| TER  | 3713 |    | WAT | 3746 |         |         |         |      |      |   |
| ATOM | 3714 | 0  | WAT | 3762 | -16.228 | -3.126  | -14.837 | 0.00 | 0.00 | O |
| ATOM | 3715 | H1 | WAT | 3762 | -16.542 | -3.660  | -14.106 | 0.00 | 0.00 | H |
| ATOM | 3716 | H2 | WAT | 3762 | -17.025 | -2.823  | -15.271 | 0.00 | 0.00 | H |
| TER  | 3717 |    | WAT | 3762 |         |         |         |      |      |   |
| ATOM | 3718 | 0  | WAT | 3778 | 14.429  | 2.658   | 12.637  | 0.00 | 0.00 | O |
| ATOM | 3719 | H1 | WAT | 3778 | 14.298  | 1.812   | 12.211  | 0.00 | 0.00 | H |
| ATOM | 3720 | H2 | WAT | 3778 | 13.757  | 2.692   | 13.318  | 0.00 | 0.00 | H |
| TER  | 3721 |    | WAT | 3778 |         |         |         |      |      |   |
| ATOM | 3722 | 0  | WAT | 3797 | -6.728  | -13.837 | 2.610   | 0.00 | 0.00 | O |
| ATOM | 3723 | H1 | WAT | 3797 | -6.558  | -14.761 | 2.430   | 0.00 | 0.00 | H |
| ATOM | 3724 | H2 | WAT | 3797 | -6.472  | -13.720 | 3.524   | 0.00 | 0.00 | H |
| TER  | 3725 |    | WAT | 3797 |         |         |         |      |      |   |
| ATOM | 3726 | 0  | WAT | 3838 | 2.576   | 2.673   | 21.488  | 0.00 | 0.00 | O |
| ATOM | 3727 | H1 | WAT | 3838 | 2.126   | 2.134   | 22.136  | 0.00 | 0.00 | H |
| ATOM | 3728 | H2 | WAT | 3838 | 3.147   | 3.243   | 22.003  | 0.00 | 0.00 | H |
| TER  | 3729 |    | WAT | 3838 |         |         |         |      |      |   |
| ATOM | 3730 | 0  | WAT | 3843 | 17.080  | 9.537   | 6.852   | 0.00 | 0.00 | O |
| ATOM | 3731 | H1 | WAT | 3843 | 17.507  | 9.445   | 7.704   | 0.00 | 0.00 | H |
| ATOM | 3732 | H2 | WAT | 3843 | 17.163  | 10.468  | 6.642   | 0.00 | 0.00 | H |
| TER  | 3733 |    | WAT | 3843 |         |         |         |      |      |   |
| ATOM | 3734 | 0  | WAT | 3878 | -15.138 | 11.661  | -10.607 | 0.00 | 0.00 | O |
| ATOM | 3735 | H1 | WAT | 3878 | -14.517 | 11.045  | -10.998 | 0.00 | 0.00 | H |
| ATOM | 3736 | H2 | WAT | 3878 | -15.246 | 11.352  | -9.707  | 0.00 | 0.00 | H |
| TER  | 3737 |    | WAT | 3878 |         |         |         |      |      |   |
| ATOM | 3738 | 0  | WAT | 3882 | 8.961   | -18.267 | 4.319   | 0.00 | 0.00 | O |
| ATOM | 3739 | H1 | WAT | 3882 | 8.737   | -19.191 | 4.419   | 0.00 | 0.00 | H |
| ATOM | 3740 | H2 | WAT | 3882 | 8.329   | -17.933 | 3.682   | 0.00 | 0.00 | H |
| TER  | 3741 |    | WAT | 3882 |         |         |         |      |      |   |
| ATOM | 3742 | 0  | WAT | 3888 | 7.686   | 4.698   | 8.754   | 0.00 | 0.00 | O |
| ATOM | 3743 | H1 | WAT | 3888 | 7.834   | 3.996   | 8.120   | 0.00 | 0.00 | H |
| ATOM | 3744 | H2 | WAT | 3888 | 8.290   | 5.391   | 8.491   | 0.00 | 0.00 | H |
| TER  | 3745 |    | WAT | 3888 |         |         |         |      |      |   |
| ATOM | 3746 | 0  | WAT | 3890 | -4.634  | -18.480 | -6.740  | 0.00 | 0.00 | O |
| ATOM | 3747 | H1 | WAT | 3890 | -4.990  | -17.813 | -7.328  | 0.00 | 0.00 | H |
| ATOM | 3748 | H2 | WAT | 3890 | -5.009  | -18.271 | -5.885  | 0.00 | 0.00 | H |
| TER  | 3749 |    | WAT | 3890 |         |         |         |      |      |   |
| ATOM | 3750 | 0  | WAT | 3932 | 9.471   | 3.289   | 6.814   | 0.00 | 0.00 | O |
| ATOM | 3751 | H1 | WAT | 3932 | 9.926   | 2.566   | 7.246   | 0.00 | 0.00 | H |
| ATOM | 3752 | H2 | WAT | 3932 | 9.167   | 2.920   | 5.984   | 0.00 | 0.00 | H |
| ATOM | 3753 | 0  | WAT | 3933 | 7.715   | -3.605  | 8.560   | 0.00 | 0.00 | O |

|      |      |    |     |      |         |         |         |      |      |   |
|------|------|----|-----|------|---------|---------|---------|------|------|---|
| ATOM | 3754 | H1 | WAT | 3933 | 8.177   | -3.134  | 9.254   | 0.00 | 0.00 | H |
| ATOM | 3755 | H2 | WAT | 3933 | 8.357   | -3.685  | 7.856   | 0.00 | 0.00 | H |
| TER  | 3756 |    | WAT | 3933 |         |         |         |      |      |   |
| ATOM | 3757 | O  | WAT | 3956 | -6.096  | 21.594  | 3.822   | 0.00 | 0.00 | O |
| ATOM | 3758 | H1 | WAT | 3956 | -6.838  | 21.025  | 3.617   | 0.00 | 0.00 | H |
| ATOM | 3759 | H2 | WAT | 3956 | -5.491  | 21.035  | 4.307   | 0.00 | 0.00 | H |
| TER  | 3760 |    | WAT | 3956 |         |         |         |      |      |   |
| ATOM | 3761 | O  | WAT | 3973 | 8.501   | 17.756  | 4.118   | 0.00 | 0.00 | O |
| ATOM | 3762 | H1 | WAT | 3973 | 8.813   | 18.347  | 3.433   | 0.00 | 0.00 | H |
| ATOM | 3763 | H2 | WAT | 3973 | 7.849   | 17.207  | 3.684   | 0.00 | 0.00 | H |
| TER  | 3764 |    | WAT | 3973 |         |         |         |      |      |   |
| ATOM | 3765 | O  | WAT | 3984 | 10.530  | -24.514 | -1.671  | 0.00 | 0.00 | O |
| ATOM | 3766 | H1 | WAT | 3984 | 10.815  | -23.673 | -2.033  | 0.00 | 0.00 | H |
| ATOM | 3767 | H2 | WAT | 3984 | 10.575  | -24.395 | -0.724  | 0.00 | 0.00 | H |
| TER  | 3768 |    | WAT | 3984 |         |         |         |      |      |   |
| ATOM | 3769 | O  | WAT | 4056 | -0.130  | 16.396  | 22.772  | 0.00 | 0.00 | O |
| ATOM | 3770 | H1 | WAT | 4056 | -0.782  | 15.703  | 22.877  | 0.00 | 0.00 | H |
| ATOM | 3771 | H2 | WAT | 4056 | 0.640   | 16.073  | 23.238  | 0.00 | 0.00 | H |
| TER  | 3772 |    | WAT | 4056 |         |         |         |      |      |   |
| ATOM | 3773 | O  | WAT | 4068 | -9.019  | -16.004 | 14.280  | 0.00 | 0.00 | O |
| ATOM | 3774 | H1 | WAT | 4068 | -8.573  | -16.024 | 13.433  | 0.00 | 0.00 | H |
| ATOM | 3775 | H2 | WAT | 4068 | -9.787  | -15.453 | 14.135  | 0.00 | 0.00 | H |
| TER  | 3776 |    | WAT | 4068 |         |         |         |      |      |   |
| ATOM | 3777 | O  | WAT | 4072 | -2.313  | 0.930   | -19.445 | 0.00 | 0.00 | O |
| ATOM | 3778 | H1 | WAT | 4072 | -2.549  | 0.058   | -19.128 | 0.00 | 0.00 | H |
| ATOM | 3779 | H2 | WAT | 4072 | -2.691  | 1.531   | -18.803 | 0.00 | 0.00 | H |
| TER  | 3780 |    | WAT | 4072 |         |         |         |      |      |   |
| ATOM | 3781 | O  | WAT | 4099 | -18.940 | -0.508  | -5.690  | 0.00 | 0.00 | O |
| ATOM | 3782 | H1 | WAT | 4099 | -19.784 | -0.505  | -5.236  | 0.00 | 0.00 | H |
| ATOM | 3783 | H2 | WAT | 4099 | -18.677 | 0.413   | -5.710  | 0.00 | 0.00 | H |
| TER  | 3784 |    | WAT | 4099 |         |         |         |      |      |   |
| ATOM | 3785 | O  | WAT | 4115 | 14.918  | -1.487  | -8.954  | 0.00 | 0.00 | O |
| ATOM | 3786 | H1 | WAT | 4115 | 14.509  | -2.340  | -9.100  | 0.00 | 0.00 | H |
| ATOM | 3787 | H2 | WAT | 4115 | 15.153  | -1.490  | -8.026  | 0.00 | 0.00 | H |
| TER  | 3788 |    | WAT | 4115 |         |         |         |      |      |   |
| ATOM | 3789 | O  | WAT | 4156 | -5.372  | 12.988  | 5.601   | 0.00 | 0.00 | O |
| ATOM | 3790 | H1 | WAT | 4156 | -6.125  | 13.257  | 5.074   | 0.00 | 0.00 | H |
| ATOM | 3791 | H2 | WAT | 4156 | -5.322  | 12.040  | 5.479   | 0.00 | 0.00 | H |
| TER  | 3792 |    | WAT | 4156 |         |         |         |      |      |   |
| ATOM | 3793 | O  | WAT | 4188 | 8.891   | 1.650   | 4.084   | 0.00 | 0.00 | O |
| ATOM | 3794 | H1 | WAT | 4188 | 9.667   | 1.400   | 3.581   | 0.00 | 0.00 | H |
| ATOM | 3795 | H2 | WAT | 4188 | 8.528   | 2.399   | 3.609   | 0.00 | 0.00 | H |
| TER  | 3796 |    | WAT | 4188 |         |         |         |      |      |   |
| ATOM | 3797 | O  | WAT | 4211 | 2.406   | -0.039  | -19.427 | 0.00 | 0.00 | O |
| ATOM | 3798 | H1 | WAT | 4211 | 2.553   | -0.983  | -19.363 | 0.00 | 0.00 | H |
| ATOM | 3799 | H2 | WAT | 4211 | 2.046   | 0.088   | -20.305 | 0.00 | 0.00 | H |
| TER  | 3800 |    | WAT | 4211 |         |         |         |      |      |   |
| ATOM | 3801 | O  | WAT | 4213 | 6.352   | -2.399  | 2.852   | 0.00 | 0.00 | O |
| ATOM | 3802 | H1 | WAT | 4213 | 5.681   | -1.724  | 2.957   | 0.00 | 0.00 | H |
| ATOM | 3803 | H2 | WAT | 4213 | 7.157   | -1.913  | 2.673   | 0.00 | 0.00 | H |
| TER  | 3804 |    | WAT | 4213 |         |         |         |      |      |   |
| ATOM | 3805 | O  | WAT | 4222 | 18.349  | -14.747 | 4.205   | 0.00 | 0.00 | O |
| ATOM | 3806 | H1 | WAT | 4222 | 17.726  | -15.048 | 3.544   | 0.00 | 0.00 | H |
| ATOM | 3807 | H2 | WAT | 4222 | 19.074  | -15.369 | 4.151   | 0.00 | 0.00 | H |
| TER  | 3808 |    | WAT | 4222 |         |         |         |      |      |   |
| ATOM | 3809 | O  | WAT | 4384 | -3.044  | -9.074  | -21.630 | 0.00 | 0.00 | O |
| ATOM | 3810 | H1 | WAT | 4384 | -2.640  | -8.812  | -20.803 | 0.00 | 0.00 | H |
| ATOM | 3811 | H2 | WAT | 4384 | -3.813  | -9.583  | -21.372 | 0.00 | 0.00 | H |
| TER  | 3812 |    | WAT | 4384 |         |         |         |      |      |   |
| ATOM | 3813 | O  | WAT | 4399 | -0.563  | 22.020  | 9.075   | 0.00 | 0.00 | O |
| ATOM | 3814 | H1 | WAT | 4399 | -0.860  | 21.649  | 8.244   | 0.00 | 0.00 | H |
| ATOM | 3815 | H2 | WAT | 4399 | -0.422  | 21.259  | 9.639   | 0.00 | 0.00 | H |
| TER  | 3816 |    | WAT | 4399 |         |         |         |      |      |   |
| ATOM | 3817 | O  | WAT | 4420 | -7.311  | 19.313  | 8.194   | 0.00 | 0.00 | O |
| ATOM | 3818 | H1 | WAT | 4420 | -6.404  | 19.084  | 7.990   | 0.00 | 0.00 | H |
| ATOM | 3819 | H2 | WAT | 4420 | -7.740  | 18.473  | 8.354   | 0.00 | 0.00 | H |
| TER  | 3820 |    | WAT | 4420 |         |         |         |      |      |   |
| ATOM | 3821 | O  | WAT | 4504 | 14.081  | -9.540  | -5.848  | 0.00 | 0.00 | O |
| ATOM | 3822 | H1 | WAT | 4504 | 14.058  | -10.292 | -5.260  | 0.00 | 0.00 | H |
| ATOM | 3823 | H2 | WAT | 4504 | 13.210  | -9.518  | -6.244  | 0.00 | 0.00 | H |
| TER  | 3824 |    | WAT | 4504 |         |         |         |      |      |   |
| ATOM | 3825 | O  | WAT | 4508 | 3.075   | -18.395 | 5.015   | 0.00 | 0.00 | O |
| ATOM | 3826 | H1 | WAT | 4508 | 2.873   | -19.326 | 4.931   | 0.00 | 0.00 | H |
| ATOM | 3827 | H2 | WAT | 4508 | 4.015   | -18.336 | 4.839   | 0.00 | 0.00 | H |
| TER  | 3828 |    | WAT | 4508 |         |         |         |      |      |   |
| ATOM | 3829 | O  | WAT | 4534 | -11.631 | -0.770  | 16.709  | 0.00 | 0.00 | O |
| ATOM | 3830 | H1 | WAT | 4534 | -12.521 | -0.659  | 16.377  | 0.00 | 0.00 | H |
| ATOM | 3831 | H2 | WAT | 4534 | -11.324 | 0.123   | 16.874  | 0.00 | 0.00 | H |
| TER  | 3832 |    | WAT | 4534 |         |         |         |      |      |   |
| ATOM | 3833 | O  | WAT | 4563 | 8.239   | -2.986  | -0.359  | 0.00 | 0.00 | O |
| ATOM | 3834 | H1 | WAT | 4563 | 9.132   | -3.191  | -0.632  | 0.00 | 0.00 | H |
| ATOM | 3835 | H2 | WAT | 4563 | 8.150   | -3.401  | 0.499   | 0.00 | 0.00 | H |
| TER  | 3836 |    | WAT | 4563 |         |         |         |      |      |   |
| ATOM | 3837 | O  | WAT | 4596 | -6.689  | -21.731 | -1.439  | 0.00 | 0.00 | O |
| ATOM | 3838 | H1 | WAT | 4596 | -7.052  | -22.266 | -0.733  | 0.00 | 0.00 | H |
| ATOM | 3839 | H2 | WAT | 4596 | -6.042  | -21.173 | -1.007  | 0.00 | 0.00 | H |
| TER  | 3840 |    | WAT | 4596 |         |         |         |      |      |   |
| ATOM | 3841 | O  | WAT | 4602 | -11.747 | -6.471  | 18.184  | 0.00 | 0.00 | O |
| ATOM | 3842 | H1 | WAT | 4602 | -11.166 | -5.715  | 18.258  | 0.00 | 0.00 | H |
| ATOM | 3843 | H2 | WAT | 4602 | -11.809 | -6.635  | 17.243  | 0.00 | 0.00 | H |
| TER  | 3844 |    | WAT | 4602 |         |         |         |      |      |   |
| ATOM | 3845 | O  | WAT | 4620 | 8.087   | 10.460  | -7.880  | 0.00 | 0.00 | O |
| ATOM | 3846 | H1 | WAT | 4620 | 7.832   | 9.717   | -7.334  | 0.00 | 0.00 | H |
| ATOM | 3847 | H2 | WAT | 4620 | 8.526   | 11.061  | -7.278  | 0.00 | 0.00 | H |
| TER  | 3848 |    | WAT | 4620 |         |         |         |      |      |   |
| ATOM | 3849 | O  | WAT | 4628 | 10.580  | -4.456  | 17.482  | 0.00 | 0.00 | O |
| ATOM | 3850 | H1 | WAT | 4628 | 9.830   | -4.106  | 17.964  | 0.00 | 0.00 | H |
| ATOM | 3851 | H2 | WAT | 4628 | 10.872  | -5.204  | 18.004  | 0.00 | 0.00 | H |
| TER  | 3852 |    | WAT | 4628 |         |         |         |      |      |   |
| ATOM | 3853 | O  | WAT | 4723 | 9.695   | -1.222  | 21.081  | 0.00 | 0.00 | O |
| ATOM | 3854 | H1 | WAT | 4723 | 10.119  | -1.615  | 20.318  | 0.00 | 0.00 | H |
| ATOM | 3855 | H2 | WAT | 4723 | 8.891   | -0.836  | 20.732  | 0.00 | 0.00 | H |
| TER  | 3856 |    | WAT | 4723 |         |         |         |      |      |   |
| ATOM | 3857 | O  | WAT | 4732 | -8.047  | -6.324  | -16.247 | 0.00 | 0.00 | O |
| ATOM | 3858 | H1 | WAT | 4732 | -7.968  | -7.083  | -15.670 | 0.00 | 0.00 | H |

|      |      |    |     |      |         |         |         |      |      |   |
|------|------|----|-----|------|---------|---------|---------|------|------|---|
| ATOM | 3859 | H2 | WAT | 4732 | -8.859  | -5.898  | -15.971 | 0.00 | 0.00 | H |
| TER  | 3860 |    | WAT | 4732 |         |         |         |      |      |   |
| ATOM | 3861 | O  | WAT | 4735 | 20.507  | -22.707 | 1.397   | 0.00 | 0.00 | O |
| ATOM | 3862 | H1 | WAT | 4735 | 19.691  | -22.440 | 1.820   | 0.00 | 0.00 | H |
| ATOM | 3863 | H2 | WAT | 4735 | 20.448  | -22.346 | 0.513   | 0.00 | 0.00 | H |
| TER  | 3864 |    | WAT | 4735 |         |         |         |      |      |   |
| ATOM | 3865 | O  | WAT | 4749 | 2.179   | -13.790 | 6.688   | 0.00 | 0.00 | O |
| ATOM | 3866 | H1 | WAT | 4749 | 1.957   | -14.283 | 5.899   | 0.00 | 0.00 | H |
| ATOM | 3867 | H2 | WAT | 4749 | 2.950   | -14.233 | 7.040   | 0.00 | 0.00 | H |
| TER  | 3868 |    | WAT | 4749 |         |         |         |      |      |   |
| ATOM | 3869 | O  | WAT | 4834 | -11.946 | 10.671  | -14.859 | 0.00 | 0.00 | O |
| ATOM | 3870 | H1 | WAT | 4834 | -11.703 | 10.663  | -15.786 | 0.00 | 0.00 | H |
| ATOM | 3871 | H2 | WAT | 4834 | -12.730 | 10.125  | -14.815 | 0.00 | 0.00 | H |
| TER  | 3872 |    | WAT | 4834 |         |         |         |      |      |   |
| ATOM | 3873 | O  | WAT | 4856 | -2.740  | 12.186  | -17.634 | 0.00 | 0.00 | O |
| ATOM | 3874 | H1 | WAT | 4856 | -2.258  | 13.014  | -17.619 | 0.00 | 0.00 | H |
| ATOM | 3875 | H2 | WAT | 4856 | -2.525  | 11.768  | -16.802 | 0.00 | 0.00 | H |
| TER  | 3876 |    | WAT | 4856 |         |         |         |      |      |   |
| ATOM | 3877 | O  | WAT | 4869 | -12.757 | 1.365   | -3.235  | 0.00 | 0.00 | O |
| ATOM | 3878 | H1 | WAT | 4869 | -13.574 | 1.485   | -2.752  | 0.00 | 0.00 | H |
| ATOM | 3879 | H2 | WAT | 4869 | -12.310 | 2.209   | -3.165  | 0.00 | 0.00 | H |
| TER  | 3880 |    | WAT | 4869 |         |         |         |      |      |   |
| ATOM | 3881 | O  | WAT | 4873 | -5.916  | 11.794  | 19.070  | 0.00 | 0.00 | O |
| ATOM | 3882 | H1 | WAT | 4873 | -6.430  | 11.312  | 18.422  | 0.00 | 0.00 | H |
| ATOM | 3883 | H2 | WAT | 4873 | -5.045  | 11.868  | 18.679  | 0.00 | 0.00 | H |
| TER  | 3884 |    | WAT | 4873 |         |         |         |      |      |   |
| ATOM | 3885 | O  | WAT | 4898 | 4.247   | 14.743  | 18.775  | 0.00 | 0.00 | O |
| ATOM | 3886 | H1 | WAT | 4898 | 3.429   | 14.339  | 19.065  | 0.00 | 0.00 | H |
| ATOM | 3887 | H2 | WAT | 4898 | 4.816   | 14.004  | 18.558  | 0.00 | 0.00 | H |
| TER  | 3888 |    | WAT | 4898 |         |         |         |      |      |   |
| ATOM | 3889 | O  | WAT | 4909 | -11.832 | 2.722   | 4.698   | 0.00 | 0.00 | O |
| ATOM | 3890 | H1 | WAT | 4909 | -12.289 | 2.154   | 5.316   | 0.00 | 0.00 | H |
| ATOM | 3891 | H2 | WAT | 4909 | -11.126 | 2.178   | 4.348   | 0.00 | 0.00 | H |
| TER  | 3892 |    | WAT | 4909 |         |         |         |      |      |   |
| ATOM | 3893 | O  | WAT | 4936 | 21.484  | 1.111   | 0.706   | 0.00 | 0.00 | O |
| ATOM | 3894 | H1 | WAT | 4936 | 22.087  | 1.847   | 0.602   | 0.00 | 0.00 | H |
| ATOM | 3895 | H2 | WAT | 4936 | 20.624  | 1.520   | 0.812   | 0.00 | 0.00 | H |
| TER  | 3896 |    | WAT | 4936 |         |         |         |      |      |   |
| ATOM | 3897 | O  | WAT | 4947 | -6.646  | -9.611  | -16.811 | 0.00 | 0.00 | O |
| ATOM | 3898 | H1 | WAT | 4947 | -7.265  | -9.212  | -16.198 | 0.00 | 0.00 | H |
| ATOM | 3899 | H2 | WAT | 4947 | -7.198  | -9.977  | -17.503 | 0.00 | 0.00 | H |
| TER  | 3900 |    | WAT | 4947 |         |         |         |      |      |   |
| ATOM | 3901 | O  | WAT | 4983 | 15.317  | -19.832 | 5.697   | 0.00 | 0.00 | O |
| ATOM | 3902 | H1 | WAT | 4983 | 16.021  | -19.998 | 5.071   | 0.00 | 0.00 | H |
| ATOM | 3903 | H2 | WAT | 4983 | 14.845  | -19.082 | 5.335   | 0.00 | 0.00 | H |
| TER  | 3904 |    | WAT | 4983 |         |         |         |      |      |   |
| ATOM | 3905 | O  | WAT | 5007 | 16.245  | -13.982 | -2.846  | 0.00 | 0.00 | O |
| ATOM | 3906 | H1 | WAT | 5007 | 15.731  | -13.796 | -3.631  | 0.00 | 0.00 | H |
| ATOM | 3907 | H2 | WAT | 5007 | 15.594  | -14.164 | -2.169  | 0.00 | 0.00 | H |
| TER  | 3908 |    | WAT | 5007 |         |         |         |      |      |   |
| ATOM | 3909 | O  | WAT | 5050 | 13.573  | 11.941  | -12.416 | 0.00 | 0.00 | O |
| ATOM | 3910 | H1 | WAT | 5050 | 12.716  | 12.145  | -12.790 | 0.00 | 0.00 | H |
| ATOM | 3911 | H2 | WAT | 5050 | 14.096  | 11.645  | -13.162 | 0.00 | 0.00 | H |
| TER  | 3912 |    | WAT | 5050 |         |         |         |      |      |   |
| ATOM | 3913 | O  | WAT | 5074 | 11.721  | 9.810   | -14.372 | 0.00 | 0.00 | O |
| ATOM | 3914 | H1 | WAT | 5074 | 11.285  | 10.653  | -14.495 | 0.00 | 0.00 | H |
| ATOM | 3915 | H2 | WAT | 5074 | 11.877  | 9.757   | -13.428 | 0.00 | 0.00 | H |
| TER  | 3916 |    | WAT | 5074 |         |         |         |      |      |   |
| ATOM | 3917 | O  | WAT | 5102 | 6.106   | 8.672   | -11.038 | 0.00 | 0.00 | O |
| ATOM | 3918 | H1 | WAT | 5102 | 6.552   | 8.016   | -11.573 | 0.00 | 0.00 | H |
| ATOM | 3919 | H2 | WAT | 5102 | 5.658   | 9.233   | -11.673 | 0.00 | 0.00 | H |
| TER  | 3920 |    | WAT | 5102 |         |         |         |      |      |   |
| ATOM | 3921 | O  | WAT | 5112 | -8.180  | 12.985  | 12.432  | 0.00 | 0.00 | O |
| ATOM | 3922 | H1 | WAT | 5112 | -9.103  | 13.238  | 12.383  | 0.00 | 0.00 | H |
| ATOM | 3923 | H2 | WAT | 5112 | -8.122  | 12.183  | 11.915  | 0.00 | 0.00 | H |
| TER  | 3924 |    | WAT | 5112 |         |         |         |      |      |   |
| ATOM | 3925 | O  | WAT | 5172 | -0.164  | -10.817 | -10.753 | 0.00 | 0.00 | O |
| ATOM | 3926 | H1 | WAT | 5172 | 0.175   | -10.135 | -11.334 | 0.00 | 0.00 | H |
| ATOM | 3927 | H2 | WAT | 5172 | -0.959  | -10.439 | -10.378 | 0.00 | 0.00 | H |
| TER  | 3928 |    | WAT | 5172 |         |         |         |      |      |   |
| ATOM | 3929 | O  | WAT | 5176 | 12.395  | -6.389  | 5.181   | 0.00 | 0.00 | O |
| ATOM | 3930 | H1 | WAT | 5176 | 12.046  | -6.032  | 5.998   | 0.00 | 0.00 | H |
| ATOM | 3931 | H2 | WAT | 5176 | 11.936  | -7.220  | 5.068   | 0.00 | 0.00 | H |
| TER  | 3932 |    | WAT | 5176 |         |         |         |      |      |   |
| ATOM | 3933 | O  | WAT | 5179 | -2.269  | -15.299 | -9.311  | 0.00 | 0.00 | O |
| ATOM | 3934 | H1 | WAT | 5179 | -1.670  | -16.045 | -9.269  | 0.00 | 0.00 | H |
| ATOM | 3935 | H2 | WAT | 5179 | -1.717  | -14.539 | -9.124  | 0.00 | 0.00 | H |
| TER  | 3936 |    | WAT | 5179 |         |         |         |      |      |   |
| ATOM | 3937 | O  | WAT | 5185 | 7.719   | -9.689  | -13.449 | 0.00 | 0.00 | O |
| ATOM | 3938 | H1 | WAT | 5185 | 7.835   | -8.761  | -13.656 | 0.00 | 0.00 | H |
| ATOM | 3939 | H2 | WAT | 5185 | 8.060   | -10.149 | -14.216 | 0.00 | 0.00 | H |
| TER  | 3940 |    | WAT | 5185 |         |         |         |      |      |   |
| ATOM | 3941 | O  | WAT | 5189 | 19.298  | -21.038 | -0.639  | 0.00 | 0.00 | O |
| ATOM | 3942 | H1 | WAT | 5189 | 19.099  | -20.790 | -1.542  | 0.00 | 0.00 | H |
| ATOM | 3943 | H2 | WAT | 5189 | 19.112  | -20.250 | -0.127  | 0.00 | 0.00 | H |
| TER  | 3944 |    | WAT | 5189 |         |         |         |      |      |   |
| ATOM | 3945 | O  | WAT | 5215 | -0.363  | 15.137  | -14.742 | 0.00 | 0.00 | O |
| ATOM | 3946 | H1 | WAT | 5215 | 0.405   | 15.590  | -14.393 | 0.00 | 0.00 | H |
| ATOM | 3947 | H2 | WAT | 5215 | -0.803  | 14.781  | -13.970 | 0.00 | 0.00 | H |
| TER  | 3948 |    | WAT | 5215 |         |         |         |      |      |   |
| ATOM | 3949 | O  | WAT | 5242 | -17.737 | -4.425  | -12.230 | 0.00 | 0.00 | O |
| ATOM | 3950 | H1 | WAT | 5242 | -18.312 | -3.738  | -12.569 | 0.00 | 0.00 | H |
| ATOM | 3951 | H2 | WAT | 5242 | -17.053 | -3.951  | -11.756 | 0.00 | 0.00 | H |
| TER  | 3952 |    | WAT | 5242 |         |         |         |      |      |   |
| ATOM | 3953 | O  | WAT | 5322 | 9.545   | 16.070  | -2.256  | 0.00 | 0.00 | O |
| ATOM | 3954 | H1 | WAT | 5322 | 10.136  | 16.511  | -1.647  | 0.00 | 0.00 | H |
| ATOM | 3955 | H2 | WAT | 5322 | 9.786   | 15.146  | -2.199  | 0.00 | 0.00 | H |
| TER  | 3956 |    | WAT | 5322 |         |         |         |      |      |   |
| ATOM | 3957 | O  | WAT | 5333 | 12.406  | -5.979  | 15.741  | 0.00 | 0.00 | O |
| ATOM | 3958 | H1 | WAT | 5333 | 11.840  | -5.403  | 15.227  | 0.00 | 0.00 | H |
| ATOM | 3959 | H2 | WAT | 5333 | 11.805  | -6.590  | 16.165  | 0.00 | 0.00 | H |
| TER  | 3960 |    | WAT | 5333 |         |         |         |      |      |   |
| ATOM | 3961 | O  | WAT | 5369 | 7.347   | 10.111  | 20.173  | 0.00 | 0.00 | O |
| ATOM | 3962 | H1 | WAT | 5369 | 6.851   | 10.376  | 19.398  | 0.00 | 0.00 | H |
| ATOM | 3963 | H2 | WAT | 5369 | 6.736   | 10.231  | 20.899  | 0.00 | 0.00 | H |





|      |      |    |     |      |         |         |         |      |      |   |
|------|------|----|-----|------|---------|---------|---------|------|------|---|
| ATOM | 4069 | H1 | WAT | 5804 | 8.882   | 9.933   | -13.418 | 0.00 | 0.00 | H |
| ATOM | 4070 | H2 | WAT | 5804 | 8.399   | 9.330   | -14.721 | 0.00 | 0.00 | H |
| TER  | 4071 |    | WAT | 5804 |         |         |         |      |      |   |
| ATOM | 4072 | O  | WAT | 5851 | 17.802  | 6.160   | -8.286  | 0.00 | 0.00 | O |
| ATOM | 4073 | H1 | WAT | 5851 | 17.561  | 5.644   | -9.056  | 0.00 | 0.00 | H |
| ATOM | 4074 | H2 | WAT | 5851 | 18.391  | 5.591   | -7.792  | 0.00 | 0.00 | H |
| TER  | 4075 |    | WAT | 5851 |         |         |         |      |      |   |
| ATOM | 4076 | O  | WAT | 5891 | 4.934   | -8.914  | 10.895  | 0.00 | 0.00 | O |
| ATOM | 4077 | H1 | WAT | 5891 | 4.406   | -9.713  | 10.900  | 0.00 | 0.00 | H |
| ATOM | 4078 | H2 | WAT | 5891 | 5.820   | -9.209  | 11.097  | 0.00 | 0.00 | H |
| TER  | 4079 |    | WAT | 5891 |         |         |         |      |      |   |
| ATOM | 4080 | O  | WAT | 5893 | 17.952  | -0.715  | -2.955  | 0.00 | 0.00 | O |
| ATOM | 4081 | H1 | WAT | 5893 | 17.675  | -1.607  | -2.741  | 0.00 | 0.00 | H |
| ATOM | 4082 | H2 | WAT | 5893 | 17.902  | -0.673  | -3.911  | 0.00 | 0.00 | H |
| TER  | 4083 |    | WAT | 5893 |         |         |         |      |      |   |
| ATOM | 4084 | O  | WAT | 5906 | -4.548  | -13.418 | -16.549 | 0.00 | 0.00 | O |
| ATOM | 4085 | H1 | WAT | 5906 | -5.067  | -14.090 | -16.989 | 0.00 | 0.00 | H |
| ATOM | 4086 | H2 | WAT | 5906 | -3.738  | -13.368 | -17.057 | 0.00 | 0.00 | H |
| TER  | 4087 |    | WAT | 5906 |         |         |         |      |      |   |
| ATOM | 4088 | O  | WAT | 5980 | -12.436 | -3.794  | -6.450  | 0.00 | 0.00 | O |
| ATOM | 4089 | H1 | WAT | 5980 | -11.900 | -4.300  | -7.060  | 0.00 | 0.00 | H |
| ATOM | 4090 | H2 | WAT | 5980 | -11.990 | -3.882  | -5.608  | 0.00 | 0.00 | H |
| TER  | 4091 |    | WAT | 5980 |         |         |         |      |      |   |
| ATOM | 4092 | O  | WAT | 5987 | -3.809  | -5.264  | 14.380  | 0.00 | 0.00 | O |
| ATOM | 4093 | H1 | WAT | 5987 | -4.730  | -5.181  | 14.131  | 0.00 | 0.00 | H |
| ATOM | 4094 | H2 | WAT | 5987 | -3.732  | -4.752  | 15.184  | 0.00 | 0.00 | H |
| TER  | 4095 |    | WAT | 5987 |         |         |         |      |      |   |
| ATOM | 4096 | O  | WAT | 5990 | 0.522   | -23.719 | 4.679   | 0.00 | 0.00 | O |
| ATOM | 4097 | H1 | WAT | 5990 | 0.013   | -22.930 | 4.870   | 0.00 | 0.00 | H |
| ATOM | 4098 | H2 | WAT | 5990 | 1.322   | -23.619 | 5.196   | 0.00 | 0.00 | H |
| TER  | 4099 |    | WAT | 5990 |         |         |         |      |      |   |
| ATOM | 4100 | O  | WAT | 6000 | -14.626 | -6.813  | 1.473   | 0.00 | 0.00 | O |
| ATOM | 4101 | H1 | WAT | 6000 | -14.548 | -6.773  | 2.426   | 0.00 | 0.00 | H |
| ATOM | 4102 | H2 | WAT | 6000 | -13.853 | -7.301  | 1.190   | 0.00 | 0.00 | H |
| TER  | 4103 |    | WAT | 6000 |         |         |         |      |      |   |
| ATOM | 4104 | O  | WAT | 6029 | -5.941  | -5.835  | -13.725 | 0.00 | 0.00 | O |
| ATOM | 4105 | H1 | WAT | 6029 | -6.439  | -5.029  | -13.868 | 0.00 | 0.00 | H |
| ATOM | 4106 | H2 | WAT | 6029 | -6.575  | -6.538  | -13.873 | 0.00 | 0.00 | H |
| TER  | 4107 |    | WAT | 6029 |         |         |         |      |      |   |
| ATOM | 4108 | O  | WAT | 6041 | -13.069 | 5.148   | 5.199   | 0.00 | 0.00 | O |
| ATOM | 4109 | H1 | WAT | 6041 | -12.379 | 4.726   | 4.688   | 0.00 | 0.00 | H |
| ATOM | 4110 | H2 | WAT | 6041 | -12.794 | 5.037   | 6.110   | 0.00 | 0.00 | H |
| TER  | 4111 |    | WAT | 6041 |         |         |         |      |      |   |
| ATOM | 4112 | O  | WAT | 6047 | 2.033   | -12.892 | -18.034 | 0.00 | 0.00 | O |
| ATOM | 4113 | H1 | WAT | 6047 | 2.679   | -13.388 | -18.537 | 0.00 | 0.00 | H |
| ATOM | 4114 | H2 | WAT | 6047 | 2.043   | -13.294 | -17.166 | 0.00 | 0.00 | H |
| TER  | 4115 |    | WAT | 6047 |         |         |         |      |      |   |
| ATOM | 4116 | O  | WAT | 6057 | -12.521 | -9.146  | 12.614  | 0.00 | 0.00 | O |
| ATOM | 4117 | H1 | WAT | 6057 | -12.788 | -8.364  | 13.099  | 0.00 | 0.00 | H |
| ATOM | 4118 | H2 | WAT | 6057 | -12.564 | -8.882  | 11.695  | 0.00 | 0.00 | H |
| TER  | 4119 |    | WAT | 6057 |         |         |         |      |      |   |
| ATOM | 4120 | O  | WAT | 6081 | -7.989  | -17.294 | -6.007  | 0.00 | 0.00 | O |
| ATOM | 4121 | H1 | WAT | 6081 | -7.259  | -17.207 | -5.395  | 0.00 | 0.00 | H |
| ATOM | 4122 | H2 | WAT | 6081 | -8.573  | -17.928 | -5.593  | 0.00 | 0.00 | H |
| TER  | 4123 |    | WAT | 6081 |         |         |         |      |      |   |
| ATOM | 4124 | O  | WAT | 6083 | -2.631  | 22.888  | 4.082   | 0.00 | 0.00 | O |
| ATOM | 4125 | H1 | WAT | 6083 | -3.436  | 22.583  | 4.503   | 0.00 | 0.00 | H |
| ATOM | 4126 | H2 | WAT | 6083 | -2.600  | 23.824  | 4.274   | 0.00 | 0.00 | H |
| TER  | 4127 |    | WAT | 6083 |         |         |         |      |      |   |
| ATOM | 4128 | O  | WAT | 6087 | -17.900 | 9.180   | -15.910 | 0.00 | 0.00 | O |
| ATOM | 4129 | H1 | WAT | 6087 | -17.931 | 8.640   | -15.120 | 0.00 | 0.00 | H |
| ATOM | 4130 | H2 | WAT | 6087 | -17.988 | 8.555   | -16.629 | 0.00 | 0.00 | H |
| TER  | 4131 |    | WAT | 6087 |         |         |         |      |      |   |
| ATOM | 4132 | O  | WAT | 6101 | -8.360  | 9.234   | 16.990  | 0.00 | 0.00 | O |
| ATOM | 4133 | H1 | WAT | 6101 | -7.486  | 9.601   | 16.850  | 0.00 | 0.00 | H |
| ATOM | 4134 | H2 | WAT | 6101 | -8.792  | 9.861   | 17.570  | 0.00 | 0.00 | H |
| TER  | 4135 |    | WAT | 6101 |         |         |         |      |      |   |
| ATOM | 4136 | O  | WAT | 6103 | 15.928  | -16.957 | -6.748  | 0.00 | 0.00 | O |
| ATOM | 4137 | H1 | WAT | 6103 | 16.398  | -17.246 | -5.965  | 0.00 | 0.00 | H |
| ATOM | 4138 | H2 | WAT | 6103 | 15.080  | -16.657 | -6.418  | 0.00 | 0.00 | H |
| TER  | 4139 |    | WAT | 6103 |         |         |         |      |      |   |
| ATOM | 4140 | O  | WAT | 6107 | -6.751  | -23.826 | 5.299   | 0.00 | 0.00 | O |
| ATOM | 4141 | H1 | WAT | 6107 | -6.857  | -24.381 | 4.525   | 0.00 | 0.00 | H |
| ATOM | 4142 | H2 | WAT | 6107 | -7.217  | -23.019 | 5.081   | 0.00 | 0.00 | H |
| TER  | 4143 |    | WAT | 6107 |         |         |         |      |      |   |
| ATOM | 4144 | O  | WAT | 6123 | -7.727  | -13.878 | -12.632 | 0.00 | 0.00 | O |
| ATOM | 4145 | H1 | WAT | 6123 | -7.067  | -14.150 | -13.269 | 0.00 | 0.00 | H |
| ATOM | 4146 | H2 | WAT | 6123 | -7.431  | -13.019 | -12.330 | 0.00 | 0.00 | H |
| TER  | 4147 |    | WAT | 6123 |         |         |         |      |      |   |
| ATOM | 4148 | O  | WAT | 6199 | 16.539  | 2.755   | 1.253   | 0.00 | 0.00 | O |
| ATOM | 4149 | H1 | WAT | 6199 | 16.248  | 2.250   | 2.013   | 0.00 | 0.00 | H |
| ATOM | 4150 | H2 | WAT | 6199 | 15.758  | 2.836   | 0.705   | 0.00 | 0.00 | H |
| TER  | 4151 |    | WAT | 6199 |         |         |         |      |      |   |
| ATOM | 4152 | O  | WAT | 6204 | 5.607   | -18.256 | 4.641   | 0.00 | 0.00 | O |
| ATOM | 4153 | H1 | WAT | 6204 | 6.140   | -17.894 | 3.932   | 0.00 | 0.00 | H |
| ATOM | 4154 | H2 | WAT | 6204 | 5.976   | -17.875 | 5.437   | 0.00 | 0.00 | H |
| TER  | 4155 |    | WAT | 6204 |         |         |         |      |      |   |
| ATOM | 4156 | O  | WAT | 6209 | 12.473  | -18.189 | 2.108   | 0.00 | 0.00 | O |
| ATOM | 4157 | H1 | WAT | 6209 | 12.084  | -17.667 | 2.810   | 0.00 | 0.00 | H |
| ATOM | 4158 | H2 | WAT | 6209 | 11.854  | -18.115 | 1.383   | 0.00 | 0.00 | H |
| TER  | 4159 |    | WAT | 6209 |         |         |         |      |      |   |
| ATOM | 4160 | O  | WAT | 6211 | 18.208  | 8.670   | -7.441  | 0.00 | 0.00 | O |
| ATOM | 4161 | H1 | WAT | 6211 | 18.160  | 7.764   | -7.748  | 0.00 | 0.00 | H |
| ATOM | 4162 | H2 | WAT | 6211 | 19.085  | 8.961   | -7.691  | 0.00 | 0.00 | H |
| TER  | 4163 |    | WAT | 6211 |         |         |         |      |      |   |
| ATOM | 4164 | O  | WAT | 6214 | 0.043   | -4.990  | 17.315  | 0.00 | 0.00 | O |
| ATOM | 4165 | H1 | WAT | 6214 | 0.817   | -4.913  | 17.872  | 0.00 | 0.00 | H |
| ATOM | 4166 | H2 | WAT | 6214 | -0.539  | -4.292  | 17.614  | 0.00 | 0.00 | H |
| TER  | 4167 |    | WAT | 6214 |         |         |         |      |      |   |
| ATOM | 4168 | O  | WAT | 6222 | 9.916   | -15.588 | -5.732  | 0.00 | 0.00 | O |
| ATOM | 4169 | H1 | WAT | 6222 | 9.987   | -15.213 | -4.855  | 0.00 | 0.00 | H |
| ATOM | 4170 | H2 | WAT | 6222 | 9.871   | -14.830 | -6.315  | 0.00 | 0.00 | H |
| TER  | 4171 |    | WAT | 6222 |         |         |         |      |      |   |
| ATOM | 4172 | O  | WAT | 6224 | 15.627  | 12.588  | -7.646  | 0.00 | 0.00 | O |
| ATOM | 4173 | H1 | WAT | 6224 | 14.934  | 12.630  | -6.987  | 0.00 | 0.00 | H |

|      |      |    |     |      |         |         |         |      |      |   |
|------|------|----|-----|------|---------|---------|---------|------|------|---|
| ATOM | 4174 | H2 | WAT | 6224 | 15.856  | 13.502  | -7.812  | 0.00 | 0.00 | H |
| TER  | 4175 |    | WAT | 6224 |         |         |         |      |      |   |
| ATOM | 4176 | O  | WAT | 6228 | -10.228 | -8.727  | 14.994  | 0.00 | 0.00 | O |
| ATOM | 4177 | H1 | WAT | 6228 | -10.874 | -8.199  | 15.465  | 0.00 | 0.00 | H |
| ATOM | 4178 | H2 | WAT | 6228 | -10.748 | -9.271  | 14.404  | 0.00 | 0.00 | H |
| TER  | 4179 |    | WAT | 6228 |         |         |         |      |      |   |
| ATOM | 4180 | O  | WAT | 6235 | 12.853  | -7.308  | 10.819  | 0.00 | 0.00 | O |
| ATOM | 4181 | H1 | WAT | 6235 | 12.761  | -7.323  | 11.771  | 0.00 | 0.00 | H |
| ATOM | 4182 | H2 | WAT | 6235 | 13.132  | -8.194  | 10.589  | 0.00 | 0.00 | H |
| TER  | 4183 |    | WAT | 6235 |         |         |         |      |      |   |
| ATOM | 4184 | O  | WAT | 6250 | -11.714 | 3.741   | 19.602  | 0.00 | 0.00 | O |
| ATOM | 4185 | H1 | WAT | 6250 | -10.959 | 3.590   | 19.034  | 0.00 | 0.00 | H |
| ATOM | 4186 | H2 | WAT | 6250 | -11.596 | 3.125   | 20.326  | 0.00 | 0.00 | H |
| TER  | 4187 |    | WAT | 6250 |         |         |         |      |      |   |
| ATOM | 4188 | O  | WAT | 6287 | 2.082   | -7.666  | -16.966 | 0.00 | 0.00 | O |
| ATOM | 4189 | H1 | WAT | 6287 | 1.433   | -7.518  | -16.279 | 0.00 | 0.00 | H |
| ATOM | 4190 | H2 | WAT | 6287 | 1.603   | -7.523  | -17.782 | 0.00 | 0.00 | H |
| TER  | 4191 |    | WAT | 6287 |         |         |         |      |      |   |
| ATOM | 4192 | O  | WAT | 6342 | -5.077  | 5.881   | 19.458  | 0.00 | 0.00 | O |
| ATOM | 4193 | H1 | WAT | 6342 | -4.929  | 6.619   | 18.867  | 0.00 | 0.00 | H |
| ATOM | 4194 | H2 | WAT | 6342 | -4.256  | 5.388   | 19.435  | 0.00 | 0.00 | H |
| TER  | 4195 |    | WAT | 6342 |         |         |         |      |      |   |
| ATOM | 4196 | O  | WAT | 6345 | 3.182   | 2.529   | -19.375 | 0.00 | 0.00 | O |
| ATOM | 4197 | H1 | WAT | 6345 | 3.207   | 1.598   | -19.151 | 0.00 | 0.00 | H |
| ATOM | 4198 | H2 | WAT | 6345 | 2.950   | 2.966   | -18.556 | 0.00 | 0.00 | H |
| TER  | 4199 |    | WAT | 6345 |         |         |         |      |      |   |
| ATOM | 4200 | O  | WAT | 6374 | -9.146  | -17.531 | 8.618   | 0.00 | 0.00 | O |
| ATOM | 4201 | H1 | WAT | 6374 | -9.764  | -17.886 | 7.979   | 0.00 | 0.00 | H |
| ATOM | 4202 | H2 | WAT | 6374 | -8.288  | -17.656 | 8.215   | 0.00 | 0.00 | H |
| TER  | 4203 |    | WAT | 6374 |         |         |         |      |      |   |
| ATOM | 4204 | O  | WAT | 6387 | -8.409  | 16.488  | -7.660  | 0.00 | 0.00 | O |
| ATOM | 4205 | H1 | WAT | 6387 | -7.817  | 17.144  | -7.293  | 0.00 | 0.00 | H |
| ATOM | 4206 | H2 | WAT | 6387 | -8.717  | 16.874  | -8.478  | 0.00 | 0.00 | H |
| TER  | 4207 |    | WAT | 6387 |         |         |         |      |      |   |
| ATOM | 4208 | O  | WAT | 6390 | -1.639  | 18.125  | 10.048  | 0.00 | 0.00 | O |
| ATOM | 4209 | H1 | WAT | 6390 | -2.011  | 17.883  | 9.200   | 0.00 | 0.00 | H |
| ATOM | 4210 | H2 | WAT | 6390 | -2.344  | 17.963  | 10.674  | 0.00 | 0.00 | H |
| TER  | 4211 |    | WAT | 6390 |         |         |         |      |      |   |
| ATOM | 4212 | O  | WAT | 6392 | 2.966   | 18.788  | 4.308   | 0.00 | 0.00 | O |
| ATOM | 4213 | H1 | WAT | 6392 | 2.330   | 19.505  | 4.285   | 0.00 | 0.00 | H |
| ATOM | 4214 | H2 | WAT | 6392 | 3.793   | 19.210  | 4.541   | 0.00 | 0.00 | H |
| TER  | 4215 |    | WAT | 6392 |         |         |         |      |      |   |
| ATOM | 4216 | O  | WAT | 6422 | 3.527   | 18.652  | 10.501  | 0.00 | 0.00 | O |
| ATOM | 4217 | H1 | WAT | 6422 | 3.538   | 17.836  | 10.999  | 0.00 | 0.00 | H |
| ATOM | 4218 | H2 | WAT | 6422 | 3.548   | 19.340  | 11.165  | 0.00 | 0.00 | H |
| TER  | 4219 |    | WAT | 6422 |         |         |         |      |      |   |
| ATOM | 4220 | O  | WAT | 6460 | 1.655   | -3.563  | -21.527 | 0.00 | 0.00 | O |
| ATOM | 4221 | H1 | WAT | 6460 | 2.029   | -3.226  | -20.713 | 0.00 | 0.00 | H |
| ATOM | 4222 | H2 | WAT | 6460 | 1.531   | -2.786  | -22.073 | 0.00 | 0.00 | H |
| TER  | 4223 |    | WAT | 6460 |         |         |         |      |      |   |
| ATOM | 4224 | O  | WAT | 6470 | -3.485  | 14.552  | 24.623  | 0.00 | 0.00 | O |
| ATOM | 4225 | H1 | WAT | 6470 | -2.902  | 14.434  | 25.373  | 0.00 | 0.00 | H |
| ATOM | 4226 | H2 | WAT | 6470 | -2.941  | 14.348  | 23.862  | 0.00 | 0.00 | H |
| TER  | 4227 |    | WAT | 6470 |         |         |         |      |      |   |
| ATOM | 4228 | O  | WAT | 6481 | 14.281  | -3.103  | -12.885 | 0.00 | 0.00 | O |
| ATOM | 4229 | H1 | WAT | 6481 | 13.910  | -3.960  | -12.672 | 0.00 | 0.00 | H |
| ATOM | 4230 | H2 | WAT | 6481 | 15.204  | -3.175  | -12.639 | 0.00 | 0.00 | H |
| TER  | 4231 |    | WAT | 6481 |         |         |         |      |      |   |
| ATOM | 4232 | O  | WAT | 6484 | 21.287  | 2.112   | 6.563   | 0.00 | 0.00 | O |
| ATOM | 4233 | H1 | WAT | 6484 | 20.618  | 2.244   | 7.234   | 0.00 | 0.00 | H |
| ATOM | 4234 | H2 | WAT | 6484 | 21.634  | 2.988   | 6.394   | 0.00 | 0.00 | H |
| TER  | 4235 |    | WAT | 6484 |         |         |         |      |      |   |
| ATOM | 4236 | O  | WAT | 6538 | 13.215  | -14.407 | -8.143  | 0.00 | 0.00 | O |
| ATOM | 4237 | H1 | WAT | 6538 | 12.308  | -14.105 | -8.109  | 0.00 | 0.00 | H |
| ATOM | 4238 | H2 | WAT | 6538 | 13.329  | -14.916 | -7.340  | 0.00 | 0.00 | H |
| TER  | 4239 |    | WAT | 6538 |         |         |         |      |      |   |
| ATOM | 4240 | O  | WAT | 6541 | -9.788  | 18.700  | -12.144 | 0.00 | 0.00 | O |
| ATOM | 4241 | H1 | WAT | 6541 | -9.420  | 18.028  | -11.569 | 0.00 | 0.00 | H |
| ATOM | 4242 | H2 | WAT | 6541 | -9.997  | 18.235  | -12.954 | 0.00 | 0.00 | H |
| TER  | 4243 |    | WAT | 6541 |         |         |         |      |      |   |
| ATOM | 4244 | O  | WAT | 6573 | 13.679  | 14.476  | -10.853 | 0.00 | 0.00 | O |
| ATOM | 4245 | H1 | WAT | 6573 | 12.831  | 14.894  | -10.711 | 0.00 | 0.00 | H |
| ATOM | 4246 | H2 | WAT | 6573 | 13.493  | 13.750  | -11.449 | 0.00 | 0.00 | H |
| TER  | 4247 |    | WAT | 6573 |         |         |         |      |      |   |
| ATOM | 4248 | O  | WAT | 6600 | 7.207   | 16.127  | -16.954 | 0.00 | 0.00 | O |
| ATOM | 4249 | H1 | WAT | 6600 | 7.561   | 16.261  | -17.833 | 0.00 | 0.00 | H |
| ATOM | 4250 | H2 | WAT | 6600 | 6.258   | 16.172  | -17.071 | 0.00 | 0.00 | H |
| TER  | 4251 |    | WAT | 6600 |         |         |         |      |      |   |
| ATOM | 4252 | O  | WAT | 6616 | -10.866 | -23.371 | 4.370   | 0.00 | 0.00 | O |
| ATOM | 4253 | H1 | WAT | 6616 | -10.117 | -22.805 | 4.556   | 0.00 | 0.00 | H |
| ATOM | 4254 | H2 | WAT | 6616 | -10.570 | -24.248 | 4.612   | 0.00 | 0.00 | H |
| TER  | 4255 |    | WAT | 6616 |         |         |         |      |      |   |
| ATOM | 4256 | O  | WAT | 6648 | 9.214   | -4.626  | -13.582 | 0.00 | 0.00 | O |
| ATOM | 4257 | H1 | WAT | 6648 | 8.472   | -4.068  | -13.815 | 0.00 | 0.00 | H |
| ATOM | 4258 | H2 | WAT | 6648 | 9.330   | -4.491  | -12.641 | 0.00 | 0.00 | H |
| TER  | 4259 |    | WAT | 6648 |         |         |         |      |      |   |
| ATOM | 4260 | O  | WAT | 6686 | -8.226  | -11.065 | -10.655 | 0.00 | 0.00 | O |
| ATOM | 4261 | H1 | WAT | 6686 | -8.667  | -10.373 | -10.162 | 0.00 | 0.00 | H |
| ATOM | 4262 | H2 | WAT | 6686 | -8.300  | -11.840 | -10.099 | 0.00 | 0.00 | H |
| TER  | 4263 |    | WAT | 6686 |         |         |         |      |      |   |
| ATOM | 4264 | O  | WAT | 6695 | -1.923  | -15.223 | -3.393  | 0.00 | 0.00 | O |
| ATOM | 4265 | H1 | WAT | 6695 | -2.293  | -15.458 | -4.245  | 0.00 | 0.00 | H |
| ATOM | 4266 | H2 | WAT | 6695 | -2.684  | -15.040 | -2.843  | 0.00 | 0.00 | H |
| ATOM | 4267 | O  | WAT | 6696 | 12.831  | 4.818   | -0.983  | 0.00 | 0.00 | O |
| ATOM | 4268 | H1 | WAT | 6696 | 13.449  | 4.479   | -1.629  | 0.00 | 0.00 | H |
| ATOM | 4269 | H2 | WAT | 6696 | 12.939  | 4.246   | -0.223  | 0.00 | 0.00 | H |
| TER  | 4270 |    | WAT | 6696 |         |         |         |      |      |   |
| ATOM | 4271 | O  | WAT | 6735 | -10.479 | -15.719 | -5.542  | 0.00 | 0.00 | O |
| ATOM | 4272 | H1 | WAT | 6735 | -9.822  | -16.226 | -6.019  | 0.00 | 0.00 | H |
| ATOM | 4273 | H2 | WAT | 6735 | -10.128 | -15.645 | -4.654  | 0.00 | 0.00 | H |
| TER  | 4274 |    | WAT | 6735 |         |         |         |      |      |   |
| ATOM | 4275 | O  | WAT | 6753 | 21.180  | -21.274 | 4.176   | 0.00 | 0.00 | O |
| ATOM | 4276 | H1 | WAT | 6753 | 21.078  | -22.179 | 4.470   | 0.00 | 0.00 | H |
| ATOM | 4277 | H2 | WAT | 6753 | 20.332  | -21.047 | 3.796   | 0.00 | 0.00 | H |
| TER  | 4278 |    | WAT | 6753 |         |         |         |      |      |   |

|      |      |    |     |      |         |         |         |      |      |   |
|------|------|----|-----|------|---------|---------|---------|------|------|---|
| ATOM | 4279 | O  | WAT | 6762 | -6.611  | 16.634  | -14.750 | 0.00 | 0.00 | O |
| ATOM | 4280 | H1 | WAT | 6762 | -5.974  | 15.942  | -14.570 | 0.00 | 0.00 | H |
| ATOM | 4281 | H2 | WAT | 6762 | -6.431  | 17.303  | -14.091 | 0.00 | 0.00 | H |
| TER  | 4282 |    | WAT | 6762 |         |         |         |      |      |   |
| ATOM | 4283 | O  | WAT | 6817 | -17.500 | 1.234   | -3.501  | 0.00 | 0.00 | O |
| ATOM | 4284 | H1 | WAT | 6817 | -16.846 | 0.620   | -3.838  | 0.00 | 0.00 | H |
| ATOM | 4285 | H2 | WAT | 6817 | -17.720 | 1.786   | -4.251  | 0.00 | 0.00 | H |
| TER  | 4286 |    | WAT | 6817 |         |         |         |      |      |   |
| ATOM | 4287 | O  | WAT | 6841 | -14.428 | -9.886  | 15.048  | 0.00 | 0.00 | O |
| ATOM | 4288 | H1 | WAT | 6841 | -14.205 | -9.027  | 14.690  | 0.00 | 0.00 | H |
| ATOM | 4289 | H2 | WAT | 6841 | -13.627 | -10.179 | 15.485  | 0.00 | 0.00 | H |
| TER  | 4290 |    | WAT | 6841 |         |         |         |      |      |   |
| ATOM | 4291 | O  | WAT | 6885 | 2.590   | -24.524 | 2.787   | 0.00 | 0.00 | O |
| ATOM | 4292 | H1 | WAT | 6885 | 2.434   | -23.774 | 2.212   | 0.00 | 0.00 | H |
| ATOM | 4293 | H2 | WAT | 6885 | 1.761   | -24.650 | 3.248   | 0.00 | 0.00 | H |
| TER  | 4294 |    | WAT | 6885 |         |         |         |      |      |   |
| ATOM | 4295 | O  | WAT | 6907 | -17.763 | 12.319  | -8.793  | 0.00 | 0.00 | O |
| ATOM | 4296 | H1 | WAT | 6907 | -16.821 | 12.158  | -8.749  | 0.00 | 0.00 | H |
| ATOM | 4297 | H2 | WAT | 6907 | -18.066 | 12.218  | -7.889  | 0.00 | 0.00 | H |
| TER  | 4298 |    | WAT | 6907 |         |         |         |      |      |   |
| ATOM | 4299 | O  | WAT | 6915 | -6.774  | 10.660  | 14.209  | 0.00 | 0.00 | O |
| ATOM | 4300 | H1 | WAT | 6915 | -6.435  | 10.624  | 15.103  | 0.00 | 0.00 | H |
| ATOM | 4301 | H2 | WAT | 6915 | -6.364  | 11.436  | 13.828  | 0.00 | 0.00 | H |
| TER  | 4302 |    | WAT | 6915 |         |         |         |      |      |   |
| ATOM | 4303 | O  | WAT | 6924 | -11.496 | -8.499  | -4.230  | 0.00 | 0.00 | O |
| ATOM | 4304 | H1 | WAT | 6924 | -11.534 | -8.992  | -3.409  | 0.00 | 0.00 | H |
| ATOM | 4305 | H2 | WAT | 6924 | -10.839 | -7.820  | -4.070  | 0.00 | 0.00 | H |
| TER  | 4306 |    | WAT | 6924 |         |         |         |      |      |   |
| ATOM | 4307 | O  | WAT | 6928 | 1.891   | -14.512 | -2.525  | 0.00 | 0.00 | O |
| ATOM | 4308 | H1 | WAT | 6928 | 1.206   | -15.125 | -2.792  | 0.00 | 0.00 | H |
| ATOM | 4309 | H2 | WAT | 6928 | 2.676   | -14.814 | -2.983  | 0.00 | 0.00 | H |
| END  |      |    |     |      |         |         |         |      |      |   |

DATASET 54

HEADER APOPTOSIS 29-OCT-11 XXXX  
 TITLE 3D MODEL OF BAK IN COMPLEX WITH THE BH3 DOMAIN OF BIM  
 COMPND MOLECULE: APOPTOSIS REGULATOR BAK;  
 COMPND 2 SYNONYM: BCL-2 HOMOLOGOUS ANTAGONIST/KILLER, BCL-2- LIKE 7  
 COMPND 3 PROTEIN;  
 SOURCE MOLECULE 1 (RESIDUES 1-24): BIM;  
 SOURCE 2 NCBI ACCESSION: 043521;  
 SOURCE 3 ORGANISM\_SCIENTIFIC: HOMO SAPIENS;  
 SOURCE 4 ORGANISM\_COMMON: HUMAN;  
 SOURCE 5 MOLECULE 2 (RESIDUES 25-187): BAK;  
 SOURCE 6 NCBI ACCESSION: Q16611;  
 SOURCE 7 ORGANISM\_SCIENTIFIC: HOMO SAPIENS;  
 SOURCE 8 ORGANISM\_COMMON: HUMAN;  
 KEYWDS HETERODIMER, APOPTOSIS  
 EXPDTA THEORETICAL MODEL  
 JRNL AUTH Y-P PANG, H DAI, A SMITH, XN MENG, PA SCHNEIDER, SH KAUFMANN  
 JRNL TITL BAK CONFORMATIONAL CHANGES INDUCED BY LIGAND BINDING;  
 JRNL TITL 2 INSIGHT INTO BH3 DOMAIN BINDING AND BAK HOMO-OLIGOMERIZATION  
 JRNL REF SCIENTIFIC REPORTS, SUBMITTED  
 REMARK 220 THIS IS AN AVERAGE OF CLUSTER 1 CONTAINING 19,500 SIMILAR  
 REMARK 220 CONFORMERS IDENTIFIED BY CLUSTER ANALYSIS OF 80 10-NS MOLECULAR  
 REMARK 220 DYNAMICS SIMULATIONS OF BAK\*BIM USING PMEMD WITH THE  
 REMARK 220 FF99SB FORCE FIELD. NO ENERGY MINIMIZATION IS APPLIED  
 REMARK 220 TO THIS AVERAGE STRUCTURE.  
 MOL 1  
 ATOM 1 N ARG 1 4.526 30.862 14.266 0.00 0.00  
 ATOM 2 H ARG 1 4.808 30.807 14.139 0.00 0.00  
 ATOM 3 CA ARG 1 4.095 31.242 14.823 0.00 0.00  
 ATOM 4 HA ARG 1 3.660 30.787 14.942 0.00 0.00  
 ATOM 5 CB ARG 1 3.503 31.666 14.206 0.00 0.00  
 ATOM 6 HB2 ARG 1 3.231 31.966 14.462 0.00 0.00  
 ATOM 7 HB3 ARG 1 3.773 31.993 14.011 0.00 0.00  
 ATOM 8 CG ARG 1 2.895 31.257 13.509 0.00 0.00  
 ATOM 9 HG2 ARG 1 3.048 30.998 13.272 0.00 0.00  
 ATOM 10 HG3 ARG 1 2.676 31.012 13.634 0.00 0.00  
 ATOM 11 CD ARG 1 2.364 31.535 12.949 0.00 0.00  
 ATOM 12 HD2 ARG 1 2.134 31.673 12.859 0.00 0.00  
 ATOM 13 HD3 ARG 1 2.309 31.695 12.773 0.00 0.00  
 ATOM 14 NE ARG 1 2.218 31.401 12.757 0.00 0.00  
 ATOM 15 HE ARG 1 2.328 31.165 12.888 0.00 0.00  
 ATOM 16 CZ ARG 1 1.948 31.551 12.418 0.00 0.00  
 ATOM 17 NH1 ARG 1 1.768 31.845 12.199 0.00 0.00  
 ATOM 18 1HH1 ARG 1 1.823 31.962 12.272 0.00 0.00  
 ATOM 19 2HH1 ARG 1 1.565 31.942 11.943 0.00 0.00  
 ATOM 20 NH2 ARG 1 1.853 31.403 12.292 0.00 0.00  
 ATOM 21 1HH2 ARG 1 1.982 31.174 12.446 0.00 0.00  
 ATOM 22 2HH2 ARG 1 1.650 31.515 12.036 0.00 0.00  
 ATOM 23 C ARG 1 4.781 31.817 15.847 0.00 0.00  
 ATOM 24 O ARG 1 5.450 32.686 15.689 0.00 0.00  
 ATOM 25 N PRO 2 4.662 31.353 16.899 0.00 0.00  
 ATOM 26 CD PRO 2 3.862 30.379 17.205 0.00 0.00  
 ATOM 27 HD2 PRO 2 4.196 29.578 16.957 0.00 0.00  
 ATOM 28 HD3 PRO 2 2.993 30.447 16.839 0.00 0.00  
 ATOM 29 CG PRO 2 3.816 30.409 18.467 0.00 0.00  
 ATOM 30 HG2 PRO 2 3.798 29.630 18.796 0.00 0.00  
 ATOM 31 HG3 PRO 2 3.121 30.816 18.666 0.00 0.00  
 ATOM 32 CB PRO 2 4.863 31.047 18.907 0.00 0.00  
 ATOM 33 HB2 PRO 2 4.672 31.503 19.610 0.00 0.00  
 ATOM 34 HB3 PRO 2 5.494 30.445 19.114 0.00 0.00  
 ATOM 35 CA PRO 2 5.238 31.875 17.941 0.00 0.00  
 ATOM 36 HA PRO 2 4.861 32.733 18.080 0.00 0.00  
 ATOM 37 C PRO 2 6.607 32.068 17.935 0.00 0.00  
 ATOM 38 O PRO 2 7.072 32.902 18.491 0.00 0.00  
 ATOM 39 N GLU 3 7.258 31.348 17.281 0.00 0.00  
 ATOM 40 H GLU 3 6.836 30.668 16.871 0.00 0.00  
 ATOM 41 CA GLU 3 8.557 31.479 17.141 0.00 0.00  
 ATOM 42 HA GLU 3 8.968 31.573 18.013 0.00 0.00  
 ATOM 43 CB GLU 3 9.033 30.297 16.588 0.00 0.00  
 ATOM 44 HB2 GLU 3 9.494 30.245 16.402 0.00 0.00  
 ATOM 45 HB3 GLU 3 9.103 29.897 16.845 0.00 0.00  
 ATOM 46 CG GLU 3 8.843 29.707 15.958 0.00 0.00

|      |     |      |     |   |        |        |        |      |      |
|------|-----|------|-----|---|--------|--------|--------|------|------|
| ATOM | 47  | HG2  | GLU | 3 | 8.506  | 29.969 | 15.876 | 0.00 | 0.00 |
| ATOM | 48  | HG3  | GLU | 3 | 9.096  | 29.799 | 15.726 | 0.00 | 0.00 |
| ATOM | 49  | CD   | GLU | 3 | 8.788  | 28.633 | 15.738 | 0.00 | 0.00 |
| ATOM | 50  | OE1  | GLU | 3 | 8.785  | 28.159 | 15.661 | 0.00 | 0.00 |
| ATOM | 51  | OE2  | GLU | 3 | 8.745  | 28.249 | 15.636 | 0.00 | 0.00 |
| ATOM | 52  | C    | GLU | 3 | 8.958  | 32.644 | 16.447 | 0.00 | 0.00 |
| ATOM | 53  | O    | GLU | 3 | 9.991  | 33.048 | 16.601 | 0.00 | 0.00 |
| ATOM | 54  | N    | ILE | 4 | 8.153  | 33.204 | 15.715 | 0.00 | 0.00 |
| ATOM | 55  | H    | ILE | 4 | 7.324  | 32.814 | 15.640 | 0.00 | 0.00 |
| ATOM | 56  | CA   | ILE | 4 | 8.380  | 34.373 | 15.047 | 0.00 | 0.00 |
| ATOM | 57  | HA   | ILE | 4 | 9.339  | 34.607 | 15.074 | 0.00 | 0.00 |
| ATOM | 58  | CB   | ILE | 4 | 8.010  | 34.154 | 13.738 | 0.00 | 0.00 |
| ATOM | 59  | HB   | ILE | 4 | 7.739  | 34.246 | 13.623 | 0.00 | 0.00 |
| ATOM | 60  | CG2  | ILE | 4 | 8.205  | 34.309 | 13.260 | 0.00 | 0.00 |
| ATOM | 61  | 1HG2 | ILE | 4 | 8.236  | 34.335 | 13.100 | 0.00 | 0.00 |
| ATOM | 62  | 2HG2 | ILE | 4 | 8.267  | 34.352 | 13.168 | 0.00 | 0.00 |
| ATOM | 63  | 3HG2 | ILE | 4 | 8.249  | 34.358 | 13.150 | 0.00 | 0.00 |
| ATOM | 64  | CG1  | ILE | 4 | 7.803  | 33.664 | 13.024 | 0.00 | 0.00 |
| ATOM | 65  | 2HG1 | ILE | 4 | 7.643  | 33.101 | 13.136 | 0.00 | 0.00 |
| ATOM | 66  | 3HG1 | ILE | 4 | 7.435  | 33.826 | 12.892 | 0.00 | 0.00 |
| ATOM | 67  | CD1  | ILE | 4 | 8.268  | 33.676 | 12.305 | 0.00 | 0.00 |
| ATOM | 68  | 1HD1 | ILE | 4 | 8.377  | 33.665 | 12.153 | 0.00 | 0.00 |
| ATOM | 69  | 2HD1 | ILE | 4 | 8.370  | 33.659 | 12.108 | 0.00 | 0.00 |
| ATOM | 70  | 3HD1 | ILE | 4 | 8.387  | 33.702 | 12.126 | 0.00 | 0.00 |
| ATOM | 71  | C    | ILE | 4 | 7.806  | 35.534 | 15.622 | 0.00 | 0.00 |
| ATOM | 72  | O    | ILE | 4 | 8.290  | 36.593 | 15.470 | 0.00 | 0.00 |
| ATOM | 73  | N    | TRP | 5 | 6.822  | 35.362 | 16.341 | 0.00 | 0.00 |
| ATOM | 74  | H    | TRP | 5 | 6.445  | 34.484 | 16.411 | 0.00 | 0.00 |
| ATOM | 75  | CA   | TRP | 5 | 6.224  | 36.400 | 16.997 | 0.00 | 0.00 |
| ATOM | 76  | HA   | TRP | 5 | 6.008  | 37.121 | 16.358 | 0.00 | 0.00 |
| ATOM | 77  | CB   | TRP | 5 | 5.008  | 35.898 | 17.538 | 0.00 | 0.00 |
| ATOM | 78  | HB2  | TRP | 5 | 5.056  | 35.230 | 17.977 | 0.00 | 0.00 |
| ATOM | 79  | HB3  | TRP | 5 | 4.712  | 36.419 | 18.051 | 0.00 | 0.00 |
| ATOM | 80  | CG   | TRP | 5 | 4.094  | 35.606 | 16.916 | 0.00 | 0.00 |
| ATOM | 81  | CD1  | TRP | 5 | 3.934  | 35.801 | 16.120 | 0.00 | 0.00 |
| ATOM | 82  | HD1  | TRP | 5 | 4.453  | 36.190 | 15.818 | 0.00 | 0.00 |
| ATOM | 83  | NE1  | TRP | 5 | 3.007  | 35.429 | 15.750 | 0.00 | 0.00 |
| ATOM | 84  | HE1  | TRP | 5 | 2.735  | 35.495 | 15.162 | 0.00 | 0.00 |
| ATOM | 85  | CE2  | TRP | 5 | 2.511  | 34.978 | 16.291 | 0.00 | 0.00 |
| ATOM | 86  | CZ2  | TRP | 5 | 1.569  | 34.506 | 16.215 | 0.00 | 0.00 |
| ATOM | 87  | HZ2  | TRP | 5 | 1.085  | 34.448 | 15.638 | 0.00 | 0.00 |
| ATOM | 88  | CH2  | TRP | 5 | 1.269  | 34.114 | 16.900 | 0.00 | 0.00 |
| ATOM | 89  | HH2  | TRP | 5 | 0.551  | 33.748 | 16.853 | 0.00 | 0.00 |
| ATOM | 90  | CZ3  | TRP | 5 | 1.907  | 34.205 | 17.651 | 0.00 | 0.00 |
| ATOM | 91  | HZ3  | TRP | 5 | 1.672  | 33.906 | 18.176 | 0.00 | 0.00 |
| ATOM | 92  | CE3  | TRP | 5 | 2.849  | 34.684 | 17.724 | 0.00 | 0.00 |
| ATOM | 93  | HE3  | TRP | 5 | 3.327  | 34.755 | 18.303 | 0.00 | 0.00 |
| ATOM | 94  | CD2  | TRP | 5 | 3.183  | 35.080 | 17.045 | 0.00 | 0.00 |
| ATOM | 95  | C    | TRP | 5 | 7.057  | 37.080 | 17.969 | 0.00 | 0.00 |
| ATOM | 96  | O    | TRP | 5 | 6.828  | 38.177 | 18.289 | 0.00 | 0.00 |
| ATOM | 97  | N    | ILE | 6 | 8.073  | 36.482 | 18.388 | 0.00 | 0.00 |
| ATOM | 98  | H    | ILE | 6 | 8.176  | 35.575 | 18.125 | 0.00 | 0.00 |
| ATOM | 99  | CA   | ILE | 6 | 9.056  | 37.071 | 19.202 | 0.00 | 0.00 |
| ATOM | 100 | HA   | ILE | 6 | 8.563  | 37.500 | 20.005 | 0.00 | 0.00 |
| ATOM | 101 | CB   | ILE | 6 | 9.949  | 36.001 | 19.737 | 0.00 | 0.00 |
| ATOM | 102 | HB   | ILE | 6 | 9.597  | 35.482 | 19.963 | 0.00 | 0.00 |
| ATOM | 103 | CG2  | ILE | 6 | 10.658 | 35.476 | 19.202 | 0.00 | 0.00 |
| ATOM | 104 | 1HG2 | ILE | 6 | 10.850 | 35.297 | 19.058 | 0.00 | 0.00 |
| ATOM | 105 | 2HG2 | ILE | 6 | 10.823 | 35.356 | 19.065 | 0.00 | 0.00 |
| ATOM | 106 | 3HG2 | ILE | 6 | 10.826 | 35.371 | 19.099 | 0.00 | 0.00 |
| ATOM | 107 | CG1  | ILE | 6 | 10.589 | 36.082 | 20.546 | 0.00 | 0.00 |
| ATOM | 108 | 2HG1 | ILE | 6 | 11.034 | 35.801 | 20.579 | 0.00 | 0.00 |
| ATOM | 109 | 3HG1 | ILE | 6 | 10.684 | 36.590 | 20.523 | 0.00 | 0.00 |
| ATOM | 110 | CD1  | ILE | 6 | 10.528 | 35.837 | 21.370 | 0.00 | 0.00 |
| ATOM | 111 | 1HD1 | ILE | 6 | 10.524 | 35.754 | 21.571 | 0.00 | 0.00 |
| ATOM | 112 | 2HD1 | ILE | 6 | 10.534 | 35.790 | 21.590 | 0.00 | 0.00 |
| ATOM | 113 | 3HD1 | ILE | 6 | 10.491 | 35.787 | 21.557 | 0.00 | 0.00 |
| ATOM | 114 | C    | ILE | 6 | 9.784  | 38.199 | 18.538 | 0.00 | 0.00 |
| ATOM | 115 | O    | ILE | 6 | 10.320 | 39.031 | 19.197 | 0.00 | 0.00 |
| ATOM | 116 | N    | ALA | 7 | 9.742  | 38.302 | 17.244 | 0.00 | 0.00 |
| ATOM | 117 | H    | ALA | 7 | 9.302  | 37.597 | 16.745 | 0.00 | 0.00 |
| ATOM | 118 | CA   | ALA | 7 | 10.226 | 39.427 | 16.515 | 0.00 | 0.00 |
| ATOM | 119 | HA   | ALA | 7 | 11.248 | 39.538 | 16.730 | 0.00 | 0.00 |
| ATOM | 120 | CB   | ALA | 7 | 10.086 | 39.134 | 15.074 | 0.00 | 0.00 |
| ATOM | 121 | HB1  | ALA | 7 | 10.030 | 39.147 | 14.717 | 0.00 | 0.00 |
| ATOM | 122 | HB2  | ALA | 7 | 10.136 | 39.047 | 14.721 | 0.00 | 0.00 |
| ATOM | 123 | HB3  | ALA | 7 | 10.001 | 39.005 | 14.737 | 0.00 | 0.00 |
| ATOM | 124 | C    | ALA | 7 | 9.540  | 40.731 | 16.870 | 0.00 | 0.00 |
| ATOM | 125 | O    | ALA | 7 | 10.152 | 41.756 | 16.840 | 0.00 | 0.00 |
| ATOM | 126 | N    | GLN | 8 | 8.295  | 40.698 | 17.268 | 0.00 | 0.00 |
| ATOM | 127 | H    | GLN | 8 | 7.840  | 39.835 | 17.258 | 0.00 | 0.00 |
| ATOM | 128 | CA   | GLN | 8 | 7.570  | 41.843 | 17.761 | 0.00 | 0.00 |
| ATOM | 129 | HA   | GLN | 8 | 7.715  | 42.648 | 17.087 | 0.00 | 0.00 |
| ATOM | 130 | CB   | GLN | 8 | 6.102  | 41.530 | 17.803 | 0.00 | 0.00 |
| ATOM | 131 | HB2  | GLN | 8 | 5.907  | 40.836 | 18.106 | 0.00 | 0.00 |
| ATOM | 132 | HB3  | GLN | 8 | 5.675  | 42.012 | 18.251 | 0.00 | 0.00 |
| ATOM | 133 | CG   | GLN | 8 | 5.439  | 41.517 | 16.854 | 0.00 | 0.00 |
| ATOM | 134 | HG2  | GLN | 8 | 5.384  | 41.753 | 16.547 | 0.00 | 0.00 |
| ATOM | 135 | HG3  | GLN | 8 | 5.565  | 41.252 | 16.674 | 0.00 | 0.00 |
| ATOM | 136 | CD   | GLN | 8 | 4.654  | 41.535 | 16.543 | 0.00 | 0.00 |
| ATOM | 137 | OE1  | GLN | 8 | 4.430  | 41.739 | 16.823 | 0.00 | 0.00 |
| ATOM | 138 | NE2  | GLN | 8 | 4.206  | 41.325 | 15.950 | 0.00 | 0.00 |
| ATOM | 139 | 1HE2 | GLN | 8 | 3.690  | 41.337 | 15.744 | 0.00 | 0.00 |
| ATOM | 140 | 2HE2 | GLN | 8 | 4.371  | 41.159 | 15.707 | 0.00 | 0.00 |
| ATOM | 141 | C    | GLN | 8 | 8.070  | 42.312 | 19.114 | 0.00 | 0.00 |
| ATOM | 142 | O    | GLN | 8 | 8.064  | 43.484 | 19.384 | 0.00 | 0.00 |
| ATOM | 143 | N    | GLU | 9 | 8.568  | 41.429 | 19.945 | 0.00 | 0.00 |
| ATOM | 144 | H    | GLU | 9 | 8.564  | 40.487 | 19.672 | 0.00 | 0.00 |
| ATOM | 145 | CA   | GLU | 9 | 9.198  | 41.775 | 21.206 | 0.00 | 0.00 |
| ATOM | 146 | HA   | GLU | 9 | 8.594  | 42.516 | 21.696 | 0.00 | 0.00 |
| ATOM | 147 | CB   | GLU | 9 | 9.270  | 40.554 | 22.104 | 0.00 | 0.00 |
| ATOM | 148 | HB2  | GLU | 9 | 8.892  | 39.948 | 21.901 | 0.00 | 0.00 |
| ATOM | 149 | HB3  | GLU | 9 | 9.934  | 40.246 | 22.186 | 0.00 | 0.00 |
| ATOM | 150 | CG   | GLU | 9 | 8.981  | 40.515 | 23.171 | 0.00 | 0.00 |
| ATOM | 151 | HG2  | GLU | 9 | 8.933  | 39.848 | 23.165 | 0.00 | 0.00 |

|      |     |      |     |    |        |        |        |      |      |
|------|-----|------|-----|----|--------|--------|--------|------|------|
| ATOM | 152 | HG3  | GLU | 9  | 9.563  | 40.583 | 23.414 | 0.00 | 0.00 |
| ATOM | 153 | CD   | GLU | 9  | 7.995  | 41.226 | 23.934 | 0.00 | 0.00 |
| ATOM | 154 | OE1  | GLU | 9  | 7.561  | 41.585 | 24.166 | 0.00 | 0.00 |
| ATOM | 155 | OE2  | GLU | 9  | 7.638  | 41.442 | 24.318 | 0.00 | 0.00 |
| ATOM | 156 | C    | GLU | 9  | 10.573 | 42.392 | 20.999 | 0.00 | 0.00 |
| ATOM | 157 | O    | GLU | 9  | 10.896 | 43.364 | 21.648 | 0.00 | 0.00 |
| ATOM | 158 | N    | LEU | 10 | 11.349 | 41.906 | 20.039 | 0.00 | 0.00 |
| ATOM | 159 | H    | LEU | 10 | 11.033 | 41.098 | 19.561 | 0.00 | 0.00 |
| ATOM | 160 | CA   | LEU | 10 | 12.629 | 42.489 | 19.647 | 0.00 | 0.00 |
| ATOM | 161 | HA   | LEU | 10 | 13.253 | 42.523 | 20.523 | 0.00 | 0.00 |
| ATOM | 162 | CB   | LEU | 10 | 13.288 | 41.572 | 18.617 | 0.00 | 0.00 |
| ATOM | 163 | HB2  | LEU | 10 | 13.282 | 40.595 | 18.971 | 0.00 | 0.00 |
| ATOM | 164 | HB3  | LEU | 10 | 12.718 | 41.582 | 17.756 | 0.00 | 0.00 |
| ATOM | 165 | CG   | LEU | 10 | 14.681 | 41.890 | 18.222 | 0.00 | 0.00 |
| ATOM | 166 | HG   | LEU | 10 | 14.663 | 42.785 | 17.846 | 0.00 | 0.00 |
| ATOM | 167 | CD1  | LEU | 10 | 15.646 | 41.850 | 19.227 | 0.00 | 0.00 |
| ATOM | 168 | 1HD1 | LEU | 10 | 15.885 | 41.869 | 19.477 | 0.00 | 0.00 |
| ATOM | 169 | 2HD1 | LEU | 10 | 15.874 | 41.819 | 19.479 | 0.00 | 0.00 |
| ATOM | 170 | 3HD1 | LEU | 10 | 15.895 | 41.847 | 19.450 | 0.00 | 0.00 |
| ATOM | 171 | CD2  | LEU | 10 | 15.182 | 41.012 | 17.260 | 0.00 | 0.00 |
| ATOM | 172 | 1HD2 | LEU | 10 | 15.256 | 40.788 | 17.014 | 0.00 | 0.00 |
| ATOM | 173 | 2HD2 | LEU | 10 | 15.318 | 40.839 | 17.009 | 0.00 | 0.00 |
| ATOM | 174 | 3HD2 | LEU | 10 | 15.339 | 40.777 | 17.053 | 0.00 | 0.00 |
| ATOM | 175 | C    | LEU | 10 | 12.474 | 43.930 | 19.144 | 0.00 | 0.00 |
| ATOM | 176 | O    | LEU | 10 | 13.273 | 44.786 | 19.470 | 0.00 | 0.00 |
| ATOM | 177 | N    | ARG | 11 | 11.402 | 44.220 | 18.420 | 0.00 | 0.00 |
| ATOM | 178 | H    | ARG | 11 | 10.820 | 43.461 | 18.163 | 0.00 | 0.00 |
| ATOM | 179 | CA   | ARG | 11 | 11.011 | 45.570 | 18.013 | 0.00 | 0.00 |
| ATOM | 180 | HA   | ARG | 11 | 11.861 | 46.056 | 17.570 | 0.00 | 0.00 |
| ATOM | 181 | CB   | ARG | 11 | 9.911  | 45.467 | 16.967 | 0.00 | 0.00 |
| ATOM | 182 | HB2  | ARG | 11 | 10.038 | 44.815 | 16.457 | 0.00 | 0.00 |
| ATOM | 183 | HB3  | ARG | 11 | 9.142  | 45.312 | 17.280 | 0.00 | 0.00 |
| ATOM | 184 | CG   | ARG | 11 | 9.663  | 46.378 | 16.122 | 0.00 | 0.00 |
| ATOM | 185 | HG2  | ARG | 11 | 10.214 | 46.883 | 15.993 | 0.00 | 0.00 |
| ATOM | 186 | HG3  | ARG | 11 | 9.605  | 46.137 | 15.568 | 0.00 | 0.00 |
| ATOM | 187 | CD   | ARG | 11 | 8.745  | 46.931 | 16.118 | 0.00 | 0.00 |
| ATOM | 188 | HD2  | ARG | 11 | 8.977  | 47.298 | 16.407 | 0.00 | 0.00 |
| ATOM | 189 | HD3  | ARG | 11 | 8.548  | 47.280 | 15.588 | 0.00 | 0.00 |
| ATOM | 190 | NE   | ARG | 11 | 7.828  | 46.561 | 16.400 | 0.00 | 0.00 |
| ATOM | 191 | HE   | ARG | 11 | 7.723  | 46.153 | 16.314 | 0.00 | 0.00 |
| ATOM | 192 | CZ   | ARG | 11 | 7.084  | 46.733 | 16.730 | 0.00 | 0.00 |
| ATOM | 193 | NH1  | ARG | 11 | 7.068  | 47.266 | 16.861 | 0.00 | 0.00 |
| ATOM | 194 | 1HH1 | ARG | 11 | 7.613  | 47.583 | 16.691 | 0.00 | 0.00 |
| ATOM | 195 | 2HH1 | ARG | 11 | 6.481  | 47.380 | 17.103 | 0.00 | 0.00 |
| ATOM | 196 | NH2  | ARG | 11 | 6.327  | 46.361 | 16.943 | 0.00 | 0.00 |
| ATOM | 197 | 1HH2 | ARG | 11 | 6.296  | 45.953 | 16.841 | 0.00 | 0.00 |
| ATOM | 198 | 2HH2 | ARG | 11 | 5.752  | 46.508 | 17.174 | 0.00 | 0.00 |
| ATOM | 199 | C    | ARG | 11 | 10.620 | 46.433 | 19.202 | 0.00 | 0.00 |
| ATOM | 200 | O    | ARG | 11 | 11.071 | 47.556 | 19.291 | 0.00 | 0.00 |
| ATOM | 201 | N    | ARG | 12 | 9.851  | 45.904 | 20.141 | 0.00 | 0.00 |
| ATOM | 202 | H    | ARG | 12 | 9.535  | 44.978 | 19.992 | 0.00 | 0.00 |
| ATOM | 203 | CA   | ARG | 12 | 9.413  | 46.603 | 21.348 | 0.00 | 0.00 |
| ATOM | 204 | HA   | ARG | 12 | 8.952  | 47.529 | 21.051 | 0.00 | 0.00 |
| ATOM | 205 | CB   | ARG | 12 | 8.373  | 45.767 | 22.082 | 0.00 | 0.00 |
| ATOM | 206 | HB2  | ARG | 12 | 7.802  | 45.351 | 21.541 | 0.00 | 0.00 |
| ATOM | 207 | HB3  | ARG | 12 | 8.729  | 45.112 | 22.558 | 0.00 | 0.00 |
| ATOM | 208 | CG   | ARG | 12 | 7.598  | 46.380 | 22.900 | 0.00 | 0.00 |
| ATOM | 209 | HG2  | ARG | 12 | 8.069  | 46.853 | 23.364 | 0.00 | 0.00 |
| ATOM | 210 | HG3  | ARG | 12 | 7.204  | 46.902 | 22.463 | 0.00 | 0.00 |
| ATOM | 211 | CD   | ARG | 12 | 6.695  | 45.678 | 23.691 | 0.00 | 0.00 |
| ATOM | 212 | HD2  | ARG | 12 | 6.525  | 46.049 | 24.297 | 0.00 | 0.00 |
| ATOM | 213 | HD3  | ARG | 12 | 6.018  | 45.590 | 23.378 | 0.00 | 0.00 |
| ATOM | 214 | NE   | ARG | 12 | 6.910  | 44.658 | 24.075 | 0.00 | 0.00 |
| ATOM | 215 | HE   | ARG | 12 | 7.028  | 44.097 | 23.951 | 0.00 | 0.00 |
| ATOM | 216 | CZ   | ARG | 12 | 6.947  | 44.378 | 24.581 | 0.00 | 0.00 |
| ATOM | 217 | NH1  | ARG | 12 | 6.809  | 44.991 | 24.822 | 0.00 | 0.00 |
| ATOM | 218 | 1HH1 | ARG | 12 | 6.652  | 45.714 | 24.650 | 0.00 | 0.00 |
| ATOM | 219 | 2HH1 | ARG | 12 | 6.838  | 44.727 | 25.214 | 0.00 | 0.00 |
| ATOM | 220 | NH2  | ARG | 12 | 7.133  | 43.444 | 24.858 | 0.00 | 0.00 |
| ATOM | 221 | 1HH2 | ARG | 12 | 7.233  | 42.949 | 24.695 | 0.00 | 0.00 |
| ATOM | 222 | 2HH2 | ARG | 12 | 7.160  | 43.217 | 25.241 | 0.00 | 0.00 |
| ATOM | 223 | C    | ARG | 12 | 10.566 | 46.995 | 22.249 | 0.00 | 0.00 |
| ATOM | 224 | O    | ARG | 12 | 10.627 | 48.139 | 22.647 | 0.00 | 0.00 |
| ATOM | 225 | N    | ILE | 13 | 11.502 | 46.102 | 22.526 | 0.00 | 0.00 |
| ATOM | 226 | H    | ILE | 13 | 11.382 | 45.172 | 22.196 | 0.00 | 0.00 |
| ATOM | 227 | CA   | ILE | 13 | 12.677 | 46.429 | 23.331 | 0.00 | 0.00 |
| ATOM | 228 | HA   | ILE | 13 | 12.336 | 47.013 | 24.165 | 0.00 | 0.00 |
| ATOM | 229 | CB   | ILE | 13 | 13.352 | 45.196 | 23.932 | 0.00 | 0.00 |
| ATOM | 230 | HB   | ILE | 13 | 14.065 | 45.522 | 24.517 | 0.00 | 0.00 |
| ATOM | 231 | CG2  | ILE | 13 | 12.476 | 44.491 | 24.755 | 0.00 | 0.00 |
| ATOM | 232 | 1HG2 | ILE | 13 | 12.262 | 44.243 | 24.875 | 0.00 | 0.00 |
| ATOM | 233 | 2HG2 | ILE | 13 | 12.337 | 44.324 | 25.061 | 0.00 | 0.00 |
| ATOM | 234 | 3HG2 | ILE | 13 | 12.194 | 44.391 | 24.953 | 0.00 | 0.00 |
| ATOM | 235 | CG1  | ILE | 13 | 13.987 | 44.297 | 23.031 | 0.00 | 0.00 |
| ATOM | 236 | 2HG1 | ILE | 13 | 13.340 | 43.915 | 22.465 | 0.00 | 0.00 |
| ATOM | 237 | 3HG1 | ILE | 13 | 14.580 | 44.801 | 22.493 | 0.00 | 0.00 |
| ATOM | 238 | CD1  | ILE | 13 | 14.722 | 43.224 | 23.564 | 0.00 | 0.00 |
| ATOM | 239 | 1HD1 | ILE | 13 | 14.903 | 42.964 | 23.690 | 0.00 | 0.00 |
| ATOM | 240 | 2HD1 | ILE | 13 | 14.894 | 42.957 | 23.684 | 0.00 | 0.00 |
| ATOM | 241 | 3HD1 | ILE | 13 | 14.906 | 42.964 | 23.683 | 0.00 | 0.00 |
| ATOM | 242 | C    | ILE | 13 | 13.653 | 47.337 | 22.599 | 0.00 | 0.00 |
| ATOM | 243 | O    | ILE | 13 | 14.287 | 48.155 | 23.225 | 0.00 | 0.00 |
| ATOM | 244 | N    | GLY | 14 | 13.713 | 47.278 | 21.279 | 0.00 | 0.00 |
| ATOM | 245 | H    | GLY | 14 | 13.208 | 46.562 | 20.819 | 0.00 | 0.00 |
| ATOM | 246 | CA   | GLY | 14 | 14.443 | 48.231 | 20.465 | 0.00 | 0.00 |
| ATOM | 247 | HA2  | GLY | 14 | 15.470 | 48.237 | 20.758 | 0.00 | 0.00 |
| ATOM | 248 | HA3  | GLY | 14 | 14.379 | 47.922 | 19.445 | 0.00 | 0.00 |
| ATOM | 249 | C    | GLY | 14 | 13.915 | 49.652 | 20.565 | 0.00 | 0.00 |
| ATOM | 250 | O    | GLY | 14 | 14.670 | 50.576 | 20.714 | 0.00 | 0.00 |
| ATOM | 251 | N    | ASP | 15 | 12.621 | 49.837 | 20.567 | 0.00 | 0.00 |
| ATOM | 252 | H    | ASP | 15 | 12.046 | 49.052 | 20.418 | 0.00 | 0.00 |
| ATOM | 253 | CA   | ASP | 15 | 12.000 | 51.141 | 20.759 | 0.00 | 0.00 |
| ATOM | 254 | HA   | ASP | 15 | 12.525 | 51.866 | 20.162 | 0.00 | 0.00 |
| ATOM | 255 | CB   | ASP | 15 | 10.563 | 51.097 | 20.276 | 0.00 | 0.00 |
| ATOM | 256 | HB2  | ASP | 15 | 10.088 | 50.291 | 20.599 | 0.00 | 0.00 |

|      |     |      |     |    |        |        |        |      |      |
|------|-----|------|-----|----|--------|--------|--------|------|------|
| ATOM | 257 | HB3  | ASP | 15 | 10.071 | 51.862 | 20.634 | 0.00 | 0.00 |
| ATOM | 258 | CG   | ASP | 15 | 10.391 | 51.151 | 18.892 | 0.00 | 0.00 |
| ATOM | 259 | OD1  | ASP | 15 | 10.471 | 51.265 | 18.291 | 0.00 | 0.00 |
| ATOM | 260 | OD2  | ASP | 15 | 10.131 | 51.129 | 18.376 | 0.00 | 0.00 |
| ATOM | 261 | C    | ASP | 15 | 12.083 | 51.639 | 22.197 | 0.00 | 0.00 |
| ATOM | 262 | O    | ASP | 15 | 12.167 | 52.829 | 22.422 | 0.00 | 0.00 |
| ATOM | 263 | N    | GLU | 16 | 12.127 | 50.756 | 23.176 | 0.00 | 0.00 |
| ATOM | 264 | H    | GLU | 16 | 12.021 | 49.801 | 22.945 | 0.00 | 0.00 |
| ATOM | 265 | CA   | GLU | 16 | 12.374 | 51.116 | 24.560 | 0.00 | 0.00 |
| ATOM | 266 | HA   | GLU | 16 | 11.769 | 51.968 | 24.801 | 0.00 | 0.00 |
| ATOM | 267 | CB   | GLU | 16 | 11.979 | 49.973 | 25.479 | 0.00 | 0.00 |
| ATOM | 268 | HB2  | GLU | 16 | 11.786 | 49.305 | 25.147 | 0.00 | 0.00 |
| ATOM | 269 | HB3  | GLU | 16 | 12.525 | 49.739 | 25.955 | 0.00 | 0.00 |
| ATOM | 270 | CG   | GLU | 16 | 11.117 | 50.025 | 26.230 | 0.00 | 0.00 |
| ATOM | 271 | HG2  | GLU | 16 | 10.977 | 49.999 | 26.305 | 0.00 | 0.00 |
| ATOM | 272 | HG3  | GLU | 16 | 11.174 | 49.984 | 26.214 | 0.00 | 0.00 |
| ATOM | 273 | CD   | GLU | 16 | 10.366 | 50.144 | 26.915 | 0.00 | 0.00 |
| ATOM | 274 | OE1  | GLU | 16 | 10.133 | 50.230 | 27.257 | 0.00 | 0.00 |
| ATOM | 275 | OE2  | GLU | 16 | 9.991  | 50.156 | 27.132 | 0.00 | 0.00 |
| ATOM | 276 | C    | GLU | 16 | 13.810 | 51.542 | 24.791 | 0.00 | 0.00 |
| ATOM | 277 | O    | GLU | 16 | 14.051 | 52.499 | 25.495 | 0.00 | 0.00 |
| ATOM | 278 | N    | PHE | 17 | 14.767 | 50.911 | 24.142 | 0.00 | 0.00 |
| ATOM | 279 | H    | PHE | 17 | 14.529 | 50.110 | 23.614 | 0.00 | 0.00 |
| ATOM | 280 | CA   | PHE | 17 | 16.143 | 51.360 | 24.132 | 0.00 | 0.00 |
| ATOM | 281 | HA   | PHE | 17 | 16.453 | 51.510 | 25.142 | 0.00 | 0.00 |
| ATOM | 282 | CB   | PHE | 17 | 17.034 | 50.298 | 23.526 | 0.00 | 0.00 |
| ATOM | 283 | HB2  | PHE | 17 | 16.653 | 49.729 | 23.272 | 0.00 | 0.00 |
| ATOM | 284 | HB3  | PHE | 17 | 17.475 | 50.457 | 22.887 | 0.00 | 0.00 |
| ATOM | 285 | CG   | PHE | 17 | 17.875 | 49.775 | 24.055 | 0.00 | 0.00 |
| ATOM | 286 | CD1  | PHE | 17 | 18.252 | 49.482 | 24.376 | 0.00 | 0.00 |
| ATOM | 287 | HD1  | PHE | 17 | 17.940 | 49.627 | 24.262 | 0.00 | 0.00 |
| ATOM | 288 | CE1  | PHE | 17 | 19.033 | 49.004 | 24.846 | 0.00 | 0.00 |
| ATOM | 289 | HE1  | PHE | 17 | 19.313 | 48.784 | 25.090 | 0.00 | 0.00 |
| ATOM | 290 | CZ   | PHE | 17 | 19.446 | 48.814 | 25.000 | 0.00 | 0.00 |
| ATOM | 291 | HZ   | PHE | 17 | 20.043 | 48.448 | 25.360 | 0.00 | 0.00 |
| ATOM | 292 | CE2  | PHE | 17 | 19.080 | 49.104 | 24.684 | 0.00 | 0.00 |
| ATOM | 293 | HE2  | PHE | 17 | 19.395 | 48.961 | 24.804 | 0.00 | 0.00 |
| ATOM | 294 | CD2  | PHE | 17 | 18.300 | 49.583 | 24.213 | 0.00 | 0.00 |
| ATOM | 295 | HD2  | PHE | 17 | 18.023 | 49.805 | 23.976 | 0.00 | 0.00 |
| ATOM | 296 | C    | PHE | 17 | 16.305 | 52.695 | 23.415 | 0.00 | 0.00 |
| ATOM | 297 | O    | PHE | 17 | 17.096 | 53.506 | 23.814 | 0.00 | 0.00 |
| ATOM | 298 | N    | ASN | 18 | 15.527 | 52.975 | 22.402 | 0.00 | 0.00 |
| ATOM | 299 | H    | ASN | 18 | 14.918 | 52.269 | 22.093 | 0.00 | 0.00 |
| ATOM | 300 | CA   | ASN | 18 | 15.542 | 54.255 | 21.715 | 0.00 | 0.00 |
| ATOM | 301 | HA   | ASN | 18 | 16.555 | 54.487 | 21.468 | 0.00 | 0.00 |
| ATOM | 302 | CB   | ASN | 18 | 14.758 | 54.143 | 20.427 | 0.00 | 0.00 |
| ATOM | 303 | HB2  | ASN | 18 | 14.993 | 53.239 | 19.926 | 0.00 | 0.00 |
| ATOM | 304 | HB3  | ASN | 18 | 13.724 | 54.125 | 20.633 | 0.00 | 0.00 |
| ATOM | 305 | CG   | ASN | 18 | 15.057 | 55.261 | 19.494 | 0.00 | 0.00 |
| ATOM | 306 | OD1  | ASN | 18 | 16.124 | 55.493 | 19.123 | 0.00 | 0.00 |
| ATOM | 307 | ND2  | ASN | 18 | 14.147 | 55.989 | 19.096 | 0.00 | 0.00 |
| ATOM | 308 | 1HD2 | ASN | 18 | 14.345 | 56.728 | 18.491 | 0.00 | 0.00 |
| ATOM | 309 | 2HD2 | ASN | 18 | 13.273 | 55.794 | 19.383 | 0.00 | 0.00 |
| ATOM | 310 | C    | ASN | 18 | 15.041 | 55.391 | 22.591 | 0.00 | 0.00 |
| ATOM | 311 | O    | ASN | 18 | 15.570 | 56.469 | 22.544 | 0.00 | 0.00 |
| ATOM | 312 | N    | ALA | 19 | 14.080 | 55.136 | 23.443 | 0.00 | 0.00 |
| ATOM | 313 | H    | ALA | 19 | 13.663 | 54.247 | 23.410 | 0.00 | 0.00 |
| ATOM | 314 | CA   | ALA | 19 | 13.613 | 56.073 | 24.428 | 0.00 | 0.00 |
| ATOM | 315 | HA   | ALA | 19 | 13.472 | 57.018 | 23.959 | 0.00 | 0.00 |
| ATOM | 316 | CB   | ALA | 19 | 12.284 | 55.603 | 24.930 | 0.00 | 0.00 |
| ATOM | 317 | HB1  | ALA | 19 | 11.967 | 55.493 | 25.073 | 0.00 | 0.00 |
| ATOM | 318 | HB2  | ALA | 19 | 11.947 | 55.514 | 25.044 | 0.00 | 0.00 |
| ATOM | 319 | HB3  | ALA | 19 | 11.965 | 55.477 | 25.036 | 0.00 | 0.00 |
| ATOM | 320 | C    | ALA | 19 | 14.594 | 56.291 | 25.551 | 0.00 | 0.00 |
| ATOM | 321 | O    | ALA | 19 | 14.709 | 57.365 | 26.036 | 0.00 | 0.00 |
| ATOM | 322 | N    | TYR | 20 | 15.350 | 55.306 | 25.922 | 0.00 | 0.00 |
| ATOM | 323 | H    | TYR | 20 | 15.181 | 54.442 | 25.521 | 0.00 | 0.00 |
| ATOM | 324 | CA   | TYR | 20 | 16.412 | 55.408 | 26.875 | 0.00 | 0.00 |
| ATOM | 325 | HA   | TYR | 20 | 16.057 | 55.893 | 27.725 | 0.00 | 0.00 |
| ATOM | 326 | CB   | TYR | 20 | 16.820 | 54.046 | 27.258 | 0.00 | 0.00 |
| ATOM | 327 | HB2  | TYR | 20 | 16.111 | 53.541 | 27.602 | 0.00 | 0.00 |
| ATOM | 328 | HB3  | TYR | 20 | 17.080 | 53.592 | 26.510 | 0.00 | 0.00 |
| ATOM | 329 | CG   | TYR | 20 | 17.792 | 53.891 | 28.151 | 0.00 | 0.00 |
| ATOM | 330 | CD1  | TYR | 20 | 17.808 | 53.801 | 29.213 | 0.00 | 0.00 |
| ATOM | 331 | HD1  | TYR | 20 | 17.133 | 53.851 | 29.396 | 0.00 | 0.00 |
| ATOM | 332 | CE1  | TYR | 20 | 18.704 | 53.630 | 30.037 | 0.00 | 0.00 |
| ATOM | 333 | HE1  | TYR | 20 | 18.715 | 53.552 | 30.846 | 0.00 | 0.00 |
| ATOM | 334 | CZ   | TYR | 20 | 19.591 | 53.557 | 29.802 | 0.00 | 0.00 |
| ATOM | 335 | OH   | TYR | 20 | 20.455 | 53.396 | 30.590 | 0.00 | 0.00 |
| ATOM | 336 | HH   | TYR | 20 | 20.410 | 53.296 | 31.243 | 0.00 | 0.00 |
| ATOM | 337 | CE2  | TYR | 20 | 19.576 | 53.653 | 28.741 | 0.00 | 0.00 |
| ATOM | 338 | HE2  | TYR | 20 | 20.254 | 53.596 | 28.567 | 0.00 | 0.00 |
| ATOM | 339 | CD2  | TYR | 20 | 18.680 | 53.814 | 27.917 | 0.00 | 0.00 |
| ATOM | 340 | HD2  | TYR | 20 | 18.677 | 53.872 | 27.107 | 0.00 | 0.00 |
| ATOM | 341 | C    | TYR | 20 | 17.564 | 56.219 | 26.392 | 0.00 | 0.00 |
| ATOM | 342 | O    | TYR | 20 | 18.073 | 57.026 | 27.096 | 0.00 | 0.00 |
| ATOM | 343 | N    | TYR | 21 | 17.935 | 56.069 | 25.176 | 0.00 | 0.00 |
| ATOM | 344 | H    | TYR | 21 | 17.494 | 55.381 | 24.655 | 0.00 | 0.00 |
| ATOM | 345 | CA   | TYR | 21 | 18.981 | 56.790 | 24.580 | 0.00 | 0.00 |
| ATOM | 346 | HA   | TYR | 21 | 19.806 | 56.705 | 25.176 | 0.00 | 0.00 |
| ATOM | 347 | CB   | TYR | 21 | 19.307 | 56.184 | 23.274 | 0.00 | 0.00 |
| ATOM | 348 | HB2  | TYR | 21 | 19.377 | 55.375 | 23.260 | 0.00 | 0.00 |
| ATOM | 349 | HB3  | TYR | 21 | 18.751 | 56.291 | 22.743 | 0.00 | 0.00 |
| ATOM | 350 | CG   | TYR | 21 | 20.264 | 56.462 | 22.671 | 0.00 | 0.00 |
| ATOM | 351 | CD1  | TYR | 21 | 21.166 | 56.166 | 22.798 | 0.00 | 0.00 |
| ATOM | 352 | HD1  | TYR | 21 | 21.178 | 55.749 | 23.323 | 0.00 | 0.00 |
| ATOM | 353 | CE1  | TYR | 21 | 22.050 | 56.408 | 22.237 | 0.00 | 0.00 |
| ATOM | 354 | HE1  | TYR | 21 | 22.736 | 56.176 | 22.335 | 0.00 | 0.00 |
| ATOM | 355 | CZ   | TYR | 21 | 22.037 | 56.948 | 21.546 | 0.00 | 0.00 |
| ATOM | 356 | OH   | TYR | 21 | 22.882 | 57.178 | 21.001 | 0.00 | 0.00 |
| ATOM | 357 | HH   | TYR | 21 | 23.469 | 57.078 | 21.115 | 0.00 | 0.00 |
| ATOM | 358 | CE2  | TYR | 21 | 21.138 | 57.249 | 21.418 | 0.00 | 0.00 |
| ATOM | 359 | HE2  | TYR | 21 | 21.134 | 57.664 | 20.890 | 0.00 | 0.00 |
| ATOM | 360 | CD2  | TYR | 21 | 20.254 | 57.006 | 21.978 | 0.00 | 0.00 |
| ATOM | 361 | HD2  | TYR | 21 | 19.570 | 57.234 | 21.876 | 0.00 | 0.00 |

|       |     |      |     |    |        |        |        |      |      |
|-------|-----|------|-----|----|--------|--------|--------|------|------|
| ATOM  | 362 | C    | TYR | 21 | 18.705 | 58.219 | 24.484 | 0.00 | 0.00 |
| ATOM  | 363 | O    | TYR | 21 | 19.540 | 58.994 | 24.560 | 0.00 | 0.00 |
| ATOM  | 364 | N    | ALA | 22 | 17.541 | 58.588 | 24.392 | 0.00 | 0.00 |
| ATOM  | 365 | H    | ALA | 22 | 16.900 | 57.914 | 24.305 | 0.00 | 0.00 |
| ATOM  | 366 | CA   | ALA | 22 | 17.145 | 59.910 | 24.392 | 0.00 | 0.00 |
| ATOM  | 367 | HA   | ALA | 22 | 17.761 | 60.419 | 23.845 | 0.00 | 0.00 |
| ATOM  | 368 | CB   | ALA | 22 | 15.912 | 59.958 | 23.788 | 0.00 | 0.00 |
| ATOM  | 369 | HB1  | ALA | 22 | 15.630 | 59.994 | 23.606 | 0.00 | 0.00 |
| ATOM  | 370 | HB2  | ALA | 22 | 15.614 | 59.925 | 23.645 | 0.00 | 0.00 |
| ATOM  | 371 | HB3  | ALA | 22 | 15.598 | 60.003 | 23.669 | 0.00 | 0.00 |
| ATOM  | 372 | C    | ALA | 22 | 17.144 | 60.594 | 25.652 | 0.00 | 0.00 |
| ATOM  | 373 | O    | ALA | 22 | 17.110 | 61.687 | 25.742 | 0.00 | 0.00 |
| ATOM  | 374 | N    | ARG | 23 | 17.199 | 59.967 | 26.625 | 0.00 | 0.00 |
| ATOM  | 375 | H    | ARG | 23 | 17.190 | 59.078 | 26.477 | 0.00 | 0.00 |
| ATOM  | 376 | CA   | ARG | 23 | 17.242 | 60.483 | 27.881 | 0.00 | 0.00 |
| ATOM  | 377 | HA   | ARG | 23 | 17.058 | 61.400 | 27.923 | 0.00 | 0.00 |
| ATOM  | 378 | CB   | ARG | 23 | 16.365 | 59.952 | 28.621 | 0.00 | 0.00 |
| ATOM  | 379 | HB2  | ARG | 23 | 16.373 | 59.587 | 28.753 | 0.00 | 0.00 |
| ATOM  | 380 | HB3  | ARG | 23 | 16.248 | 60.130 | 28.965 | 0.00 | 0.00 |
| ATOM  | 381 | CG   | ARG | 23 | 15.616 | 59.693 | 28.743 | 0.00 | 0.00 |
| ATOM  | 382 | HG2  | ARG | 23 | 15.555 | 59.963 | 28.603 | 0.00 | 0.00 |
| ATOM  | 383 | HG3  | ARG | 23 | 15.673 | 59.521 | 28.480 | 0.00 | 0.00 |
| ATOM  | 384 | CD   | ARG | 23 | 14.857 | 59.307 | 29.414 | 0.00 | 0.00 |
| ATOM  | 385 | HD2  | ARG | 23 | 14.933 | 59.312 | 29.744 | 0.00 | 0.00 |
| ATOM  | 386 | HD3  | ARG | 23 | 14.527 | 59.457 | 29.454 | 0.00 | 0.00 |
| ATOM  | 387 | NE   | ARG | 23 | 14.462 | 58.746 | 29.584 | 0.00 | 0.00 |
| ATOM  | 388 | HE   | ARG | 23 | 14.529 | 58.738 | 29.678 | 0.00 | 0.00 |
| ATOM  | 389 | CZ   | ARG | 23 | 14.019 | 58.250 | 29.639 | 0.00 | 0.00 |
| ATOM  | 390 | NH1  | ARG | 23 | 13.859 | 58.178 | 29.545 | 0.00 | 0.00 |
| ATOM  | 391 | 1HH1 | ARG | 23 | 14.056 | 58.510 | 29.441 | 0.00 | 0.00 |
| ATOM  | 392 | 2HH1 | ARG | 23 | 13.513 | 57.790 | 29.605 | 0.00 | 0.00 |
| ATOM  | 393 | NH2  | ARG | 23 | 13.722 | 57.798 | 29.791 | 0.00 | 0.00 |
| ATOM  | 394 | 1HH2 | ARG | 23 | 13.816 | 57.830 | 29.882 | 0.00 | 0.00 |
| ATOM  | 395 | 2HH2 | ARG | 23 | 13.387 | 57.425 | 29.834 | 0.00 | 0.00 |
| ATOM  | 396 | C    | ARG | 23 | 18.373 | 60.413 | 28.429 | 0.00 | 0.00 |
| ATOM  | 397 | O    | ARG | 23 | 18.585 | 60.854 | 29.161 | 0.00 | 0.00 |
| ATOM  | 398 | N    | ARG | 24 | 19.099 | 59.874 | 28.086 | 0.00 | 0.00 |
| ATOM  | 399 | H    | ARG | 24 | 18.848 | 59.532 | 27.496 | 0.00 | 0.00 |
| ATOM  | 400 | CA   | ARG | 24 | 20.206 | 59.722 | 28.514 | 0.00 | 0.00 |
| ATOM  | 401 | HA   | ARG | 24 | 20.345 | 59.899 | 29.049 | 0.00 | 0.00 |
| ATOM  | 402 | CB   | ARG | 24 | 20.600 | 58.897 | 28.614 | 0.00 | 0.00 |
| ATOM  | 403 | HB2  | ARG | 24 | 20.873 | 58.735 | 28.482 | 0.00 | 0.00 |
| ATOM  | 404 | HB3  | ARG | 24 | 20.383 | 58.682 | 28.502 | 0.00 | 0.00 |
| ATOM  | 405 | CG   | ARG | 24 | 20.923 | 58.566 | 29.043 | 0.00 | 0.00 |
| ATOM  | 406 | HG2  | ARG | 24 | 20.888 | 58.635 | 29.109 | 0.00 | 0.00 |
| ATOM  | 407 | HG3  | ARG | 24 | 20.959 | 58.651 | 29.071 | 0.00 | 0.00 |
| ATOM  | 408 | CD   | ARG | 24 | 21.241 | 58.010 | 29.346 | 0.00 | 0.00 |
| ATOM  | 409 | HD2  | ARG | 24 | 21.104 | 57.820 | 29.205 | 0.00 | 0.00 |
| ATOM  | 410 | HD3  | ARG | 24 | 21.200 | 58.034 | 29.493 | 0.00 | 0.00 |
| ATOM  | 411 | NE   | ARG | 24 | 21.768 | 57.692 | 29.628 | 0.00 | 0.00 |
| ATOM  | 412 | HE   | ARG | 24 | 21.903 | 57.651 | 29.603 | 0.00 | 0.00 |
| ATOM  | 413 | CZ   | ARG | 24 | 22.084 | 57.446 | 29.918 | 0.00 | 0.00 |
| ATOM  | 414 | NH1  | ARG | 24 | 21.976 | 57.455 | 29.997 | 0.00 | 0.00 |
| ATOM  | 415 | 1HH1 | ARG | 24 | 21.644 | 57.654 | 29.846 | 0.00 | 0.00 |
| ATOM  | 416 | 2HH1 | ARG | 24 | 22.231 | 57.255 | 30.216 | 0.00 | 0.00 |
| ATOM  | 417 | NH2  | ARG | 24 | 22.528 | 57.177 | 30.138 | 0.00 | 0.00 |
| ATOM  | 418 | 1HH2 | ARG | 24 | 22.626 | 57.158 | 30.094 | 0.00 | 0.00 |
| ATOM  | 419 | 2HH2 | ARG | 24 | 22.766 | 56.993 | 30.359 | 0.00 | 0.00 |
| ATOM  | 420 | C    | ARG | 24 | 20.789 | 60.145 | 28.163 | 0.00 | 0.00 |
| ATOM  | 421 | O    | ARG | 24 | 20.833 | 60.211 | 27.717 | 0.00 | 0.00 |
| TER   |     |      |     |    |        |        |        |      |      |
| MOL 2 |     |      |     |    |        |        |        |      |      |
| ATOM  | 422 | N    | SER | 25 | 33.243 | 56.644 | 6.542  | 0.00 | 0.00 |
| ATOM  | 423 | H    | SER | 25 | 33.611 | 56.480 | 6.865  | 0.00 | 0.00 |
| ATOM  | 424 | CA   | SER | 25 | 32.505 | 56.958 | 6.710  | 0.00 | 0.00 |
| ATOM  | 425 | HA   | SER | 25 | 32.199 | 56.500 | 6.865  | 0.00 | 0.00 |
| ATOM  | 426 | CB   | SER | 25 | 32.827 | 57.371 | 7.569  | 0.00 | 0.00 |
| ATOM  | 427 | HB2  | SER | 25 | 33.051 | 57.835 | 7.531  | 0.00 | 0.00 |
| ATOM  | 428 | HB3  | SER | 25 | 32.360 | 57.511 | 7.726  | 0.00 | 0.00 |
| ATOM  | 429 | OG   | SER | 25 | 33.430 | 56.989 | 8.222  | 0.00 | 0.00 |
| ATOM  | 430 | HG   | SER | 25 | 33.741 | 56.797 | 8.329  | 0.00 | 0.00 |
| ATOM  | 431 | C    | SER | 25 | 31.797 | 57.479 | 5.856  | 0.00 | 0.00 |
| ATOM  | 432 | O    | SER | 25 | 30.961 | 57.789 | 6.103  | 0.00 | 0.00 |
| ATOM  | 433 | N    | ALA | 26 | 32.111 | 57.571 | 4.847  | 0.00 | 0.00 |
| ATOM  | 434 | H    | ALA | 26 | 32.811 | 57.306 | 4.705  | 0.00 | 0.00 |
| ATOM  | 435 | CA   | ALA | 26 | 31.533 | 58.087 | 3.951  | 0.00 | 0.00 |
| ATOM  | 436 | HA   | ALA | 26 | 31.043 | 58.664 | 4.325  | 0.00 | 0.00 |
| ATOM  | 437 | CB   | ALA | 26 | 32.387 | 58.747 | 3.409  | 0.00 | 0.00 |
| ATOM  | 438 | HB1  | ALA | 26 | 32.555 | 58.925 | 3.248  | 0.00 | 0.00 |
| ATOM  | 439 | HB2  | ALA | 26 | 32.595 | 58.926 | 3.309  | 0.00 | 0.00 |
| ATOM  | 440 | HB3  | ALA | 26 | 32.624 | 58.879 | 3.274  | 0.00 | 0.00 |
| ATOM  | 441 | C    | ALA | 26 | 30.723 | 57.280 | 3.079  | 0.00 | 0.00 |
| ATOM  | 442 | O    | ALA | 26 | 29.951 | 57.748 | 2.469  | 0.00 | 0.00 |
| ATOM  | 443 | N    | SER | 27 | 30.877 | 56.073 | 3.024  | 0.00 | 0.00 |
| ATOM  | 444 | H    | SER | 27 | 31.525 | 55.753 | 3.539  | 0.00 | 0.00 |
| ATOM  | 445 | CA   | SER | 27 | 30.132 | 55.164 | 2.306  | 0.00 | 0.00 |
| ATOM  | 446 | HA   | SER | 27 | 29.274 | 55.609 | 2.018  | 0.00 | 0.00 |
| ATOM  | 447 | CB   | SER | 27 | 30.836 | 54.831 | 1.113  | 0.00 | 0.00 |
| ATOM  | 448 | HB2  | SER | 27 | 30.508 | 54.655 | 0.642  | 0.00 | 0.00 |
| ATOM  | 449 | HB3  | SER | 27 | 31.198 | 55.255 | 0.804  | 0.00 | 0.00 |
| ATOM  | 450 | OG   | SER | 27 | 31.436 | 54.211 | 0.983  | 0.00 | 0.00 |
| ATOM  | 451 | HG   | SER | 27 | 31.816 | 54.149 | 0.421  | 0.00 | 0.00 |
| ATOM  | 452 | C    | SER | 27 | 29.777 | 53.943 | 3.103  | 0.00 | 0.00 |
| ATOM  | 453 | O    | SER | 27 | 30.474 | 53.583 | 4.021  | 0.00 | 0.00 |
| ATOM  | 454 | N    | GLU | 28 | 28.705 | 53.272 | 2.743  | 0.00 | 0.00 |
| ATOM  | 455 | H    | GLU | 28 | 28.166 | 53.625 | 2.000  | 0.00 | 0.00 |
| ATOM  | 456 | CA   | GLU | 28 | 28.237 | 52.074 | 3.415  | 0.00 | 0.00 |
| ATOM  | 457 | HA   | GLU | 28 | 28.075 | 52.320 | 4.445  | 0.00 | 0.00 |
| ATOM  | 458 | CB   | GLU | 28 | 26.897 | 51.657 | 2.835  | 0.00 | 0.00 |
| ATOM  | 459 | HB2  | GLU | 28 | 26.523 | 50.974 | 3.351  | 0.00 | 0.00 |
| ATOM  | 460 | HB3  | GLU | 28 | 26.301 | 52.373 | 2.882  | 0.00 | 0.00 |
| ATOM  | 461 | CG   | GLU | 28 | 26.809 | 51.205 | 1.543  | 0.00 | 0.00 |
| ATOM  | 462 | HG2  | GLU | 28 | 27.332 | 51.747 | 1.034  | 0.00 | 0.00 |
| ATOM  | 463 | HG3  | GLU | 28 | 27.198 | 50.389 | 1.544  | 0.00 | 0.00 |
| ATOM  | 464 | CD   | GLU | 28 | 25.483 | 51.124 | 0.935  | 0.00 | 0.00 |



|      |     |      |     |    |        |        |        |      |      |
|------|-----|------|-----|----|--------|--------|--------|------|------|
| ATOM | 465 | OE1  | GLU | 28 | 24.955 | 51.101 | 0.696  | 0.00 | 0.00 |
| ATOM | 466 | OE2  | GLU | 28 | 24.942 | 51.097 | 0.684  | 0.00 | 0.00 |
| ATOM | 467 | C    | GLU | 28 | 29.241 | 50.930 | 3.408  | 0.00 | 0.00 |
| ATOM | 468 | O    | GLU | 28 | 29.336 | 50.203 | 4.367  | 0.00 | 0.00 |
| ATOM | 469 | N    | GLU | 29 | 30.047 | 50.803 | 2.375  | 0.00 | 0.00 |
| ATOM | 470 | H    | GLU | 29 | 29.936 | 51.434 | 1.629  | 0.00 | 0.00 |
| ATOM | 471 | CA   | GLU | 29 | 31.089 | 49.797 | 2.282  | 0.00 | 0.00 |
| ATOM | 472 | HA   | GLU | 29 | 30.689 | 48.862 | 2.604  | 0.00 | 0.00 |
| ATOM | 473 | CB   | GLU | 29 | 31.521 | 49.638 | 0.847  | 0.00 | 0.00 |
| ATOM | 474 | HB2  | GLU | 29 | 31.690 | 50.107 | 0.502  | 0.00 | 0.00 |
| ATOM | 475 | HB3  | GLU | 29 | 32.015 | 49.307 | 0.684  | 0.00 | 0.00 |
| ATOM | 476 | CG   | GLU | 29 | 31.074 | 49.264 | 0.091  | 0.00 | 0.00 |
| ATOM | 477 | HG2  | GLU | 29 | 30.983 | 48.801 | 0.422  | 0.00 | 0.00 |
| ATOM | 478 | HG3  | GLU | 29 | 30.589 | 49.543 | 0.168  | 0.00 | 0.00 |
| ATOM | 479 | CD   | GLU | 29 | 31.410 | 49.133 | -1.217 | 0.00 | 0.00 |
| ATOM | 480 | OE1  | GLU | 29 | 31.572 | 49.034 | -1.727 | 0.00 | 0.00 |
| ATOM | 481 | OE2  | GLU | 29 | 31.513 | 49.126 | -1.749 | 0.00 | 0.00 |
| ATOM | 482 | C    | GLU | 29 | 32.278 | 50.094 | 3.184  | 0.00 | 0.00 |
| ATOM | 483 | O    | GLU | 29 | 32.896 | 49.199 | 3.676  | 0.00 | 0.00 |
| ATOM | 484 | N    | GLN | 30 | 32.570 | 51.340 | 3.459  | 0.00 | 0.00 |
| ATOM | 485 | H    | GLN | 30 | 32.016 | 52.027 | 3.044  | 0.00 | 0.00 |
| ATOM | 486 | CA   | GLN | 30 | 33.571 | 51.753 | 4.430  | 0.00 | 0.00 |
| ATOM | 487 | HA   | GLN | 30 | 34.432 | 51.125 | 4.329  | 0.00 | 0.00 |
| ATOM | 488 | CB   | GLN | 30 | 33.995 | 53.176 | 4.160  | 0.00 | 0.00 |
| ATOM | 489 | HB2  | GLN | 30 | 33.413 | 53.671 | 3.954  | 0.00 | 0.00 |
| ATOM | 490 | HB3  | GLN | 30 | 34.314 | 53.542 | 4.787  | 0.00 | 0.00 |
| ATOM | 491 | CG   | GLN | 30 | 34.800 | 53.453 | 3.346  | 0.00 | 0.00 |
| ATOM | 492 | HG2  | GLN | 30 | 35.370 | 53.099 | 3.529  | 0.00 | 0.00 |
| ATOM | 493 | HG3  | GLN | 30 | 34.590 | 53.110 | 2.777  | 0.00 | 0.00 |
| ATOM | 494 | CD   | GLN | 30 | 35.139 | 54.674 | 3.037  | 0.00 | 0.00 |
| ATOM | 495 | OE1  | GLN | 30 | 34.890 | 55.355 | 3.205  | 0.00 | 0.00 |
| ATOM | 496 | NE2  | GLN | 30 | 35.713 | 55.004 | 2.576  | 0.00 | 0.00 |
| ATOM | 497 | 1HE2 | GLN | 30 | 35.932 | 55.796 | 2.371  | 0.00 | 0.00 |
| ATOM | 498 | 2HE2 | GLN | 30 | 35.925 | 54.463 | 2.432  | 0.00 | 0.00 |
| ATOM | 499 | C    | GLN | 30 | 33.071 | 51.590 | 5.852  | 0.00 | 0.00 |
| ATOM | 500 | O    | GLN | 30 | 33.805 | 51.158 | 6.704  | 0.00 | 0.00 |
| ATOM | 501 | N    | VAL | 31 | 31.807 | 51.850 | 6.105  | 0.00 | 0.00 |
| ATOM | 502 | H    | VAL | 31 | 31.265 | 52.225 | 5.375  | 0.00 | 0.00 |
| ATOM | 503 | CA   | VAL | 31 | 31.169 | 51.598 | 7.392  | 0.00 | 0.00 |
| ATOM | 504 | HA   | VAL | 31 | 31.791 | 52.015 | 8.165  | 0.00 | 0.00 |
| ATOM | 505 | CB   | VAL | 31 | 29.815 | 52.290 | 7.475  | 0.00 | 0.00 |
| ATOM | 506 | HB   | VAL | 31 | 29.249 | 52.039 | 6.650  | 0.00 | 0.00 |
| ATOM | 507 | CG1  | VAL | 31 | 29.039 | 51.952 | 8.665  | 0.00 | 0.00 |
| ATOM | 508 | 1HG1 | VAL | 31 | 28.843 | 51.880 | 8.962  | 0.00 | 0.00 |
| ATOM | 509 | 2HG1 | VAL | 31 | 28.829 | 51.883 | 8.942  | 0.00 | 0.00 |
| ATOM | 510 | 3HG1 | VAL | 31 | 28.849 | 51.853 | 8.949  | 0.00 | 0.00 |
| ATOM | 511 | CG2  | VAL | 31 | 29.955 | 53.742 | 7.501  | 0.00 | 0.00 |
| ATOM | 512 | 1HG2 | VAL | 31 | 29.958 | 54.102 | 7.536  | 0.00 | 0.00 |
| ATOM | 513 | 2HG2 | VAL | 31 | 30.022 | 54.095 | 7.512  | 0.00 | 0.00 |
| ATOM | 514 | 3HG2 | VAL | 31 | 29.977 | 54.096 | 7.467  | 0.00 | 0.00 |
| ATOM | 515 | C    | VAL | 31 | 31.075 | 50.114 | 7.684  | 0.00 | 0.00 |
| ATOM | 516 | O    | VAL | 31 | 31.261 | 49.726 | 8.814  | 0.00 | 0.00 |
| ATOM | 517 | N    | ALA | 32 | 30.869 | 49.255 | 6.700  | 0.00 | 0.00 |
| ATOM | 518 | H    | ALA | 32 | 30.656 | 49.609 | 5.801  | 0.00 | 0.00 |
| ATOM | 519 | CA   | ALA | 32 | 30.899 | 47.813 | 6.884  | 0.00 | 0.00 |
| ATOM | 520 | HA   | ALA | 32 | 30.194 | 47.556 | 7.647  | 0.00 | 0.00 |
| ATOM | 521 | CB   | ALA | 32 | 30.442 | 47.150 | 5.609  | 0.00 | 0.00 |
| ATOM | 522 | HB1  | ALA | 32 | 30.314 | 46.988 | 5.306  | 0.00 | 0.00 |
| ATOM | 523 | HB2  | ALA | 32 | 30.336 | 46.997 | 5.294  | 0.00 | 0.00 |
| ATOM | 524 | HB3  | ALA | 32 | 30.337 | 46.975 | 5.309  | 0.00 | 0.00 |
| ATOM | 525 | C    | ALA | 32 | 32.263 | 47.299 | 7.347  | 0.00 | 0.00 |
| ATOM | 526 | O    | ALA | 32 | 32.327 | 46.430 | 8.175  | 0.00 | 0.00 |
| ATOM | 527 | N    | GLN | 33 | 33.349 | 47.879 | 6.889  | 0.00 | 0.00 |
| ATOM | 528 | H    | GLN | 33 | 33.236 | 48.577 | 6.210  | 0.00 | 0.00 |
| ATOM | 529 | CA   | GLN | 33 | 34.698 | 47.559 | 7.335  | 0.00 | 0.00 |
| ATOM | 530 | HA   | GLN | 33 | 34.800 | 46.495 | 7.350  | 0.00 | 0.00 |
| ATOM | 531 | CB   | GLN | 33 | 35.700 | 48.108 | 6.345  | 0.00 | 0.00 |
| ATOM | 532 | HB2  | GLN | 33 | 35.500 | 48.539 | 5.865  | 0.00 | 0.00 |
| ATOM | 533 | HB3  | GLN | 33 | 36.211 | 48.475 | 6.567  | 0.00 | 0.00 |
| ATOM | 534 | CG   | GLN | 33 | 36.302 | 47.588 | 5.685  | 0.00 | 0.00 |
| ATOM | 535 | HG2  | GLN | 33 | 36.498 | 47.365 | 5.876  | 0.00 | 0.00 |
| ATOM | 536 | HG3  | GLN | 33 | 36.048 | 47.343 | 5.590  | 0.00 | 0.00 |
| ATOM | 537 | CD   | GLN | 33 | 36.993 | 47.696 | 4.882  | 0.00 | 0.00 |
| ATOM | 538 | OE1  | GLN | 33 | 37.227 | 47.802 | 4.526  | 0.00 | 0.00 |
| ATOM | 539 | NE2  | GLN | 33 | 37.343 | 47.679 | 4.567  | 0.00 | 0.00 |
| ATOM | 540 | 1HE2 | GLN | 33 | 37.160 | 47.592 | 4.851  | 0.00 | 0.00 |
| ATOM | 541 | 2HE2 | GLN | 33 | 37.787 | 47.751 | 4.046  | 0.00 | 0.00 |
| ATOM | 542 | C    | GLN | 33 | 34.993 | 48.038 | 8.749  | 0.00 | 0.00 |
| ATOM | 543 | O    | GLN | 33 | 35.723 | 47.410 | 9.455  | 0.00 | 0.00 |
| ATOM | 544 | N    | ASP | 34 | 34.394 | 49.108 | 9.197  | 0.00 | 0.00 |
| ATOM | 545 | H    | ASP | 34 | 33.854 | 49.615 | 8.562  | 0.00 | 0.00 |
| ATOM | 546 | CA   | ASP | 34 | 34.459 | 49.557 | 10.582 | 0.00 | 0.00 |
| ATOM | 547 | HA   | ASP | 34 | 35.454 | 49.428 | 10.953 | 0.00 | 0.00 |
| ATOM | 548 | CB   | ASP | 34 | 34.114 | 51.026 | 10.663 | 0.00 | 0.00 |
| ATOM | 549 | HB2  | ASP | 34 | 33.195 | 51.195 | 10.188 | 0.00 | 0.00 |
| ATOM | 550 | HB3  | ASP | 34 | 33.989 | 51.288 | 11.678 | 0.00 | 0.00 |
| ATOM | 551 | CG   | ASP | 34 | 35.128 | 51.942 | 10.081 | 0.00 | 0.00 |
| ATOM | 552 | OD1  | ASP | 34 | 35.429 | 52.406 | 9.822  | 0.00 | 0.00 |
| ATOM | 553 | OD2  | ASP | 34 | 35.622 | 52.233 | 9.896  | 0.00 | 0.00 |
| ATOM | 554 | C    | ASP | 34 | 33.547 | 48.754 | 11.504 | 0.00 | 0.00 |
| ATOM | 555 | O    | ASP | 34 | 33.898 | 48.494 | 12.635 | 0.00 | 0.00 |
| ATOM | 556 | N    | THR | 35 | 32.397 | 48.310 | 11.019 | 0.00 | 0.00 |
| ATOM | 557 | H    | THR | 35 | 32.182 | 48.558 | 10.085 | 0.00 | 0.00 |
| ATOM | 558 | CA   | THR | 35 | 31.401 | 47.564 | 11.793 | 0.00 | 0.00 |
| ATOM | 559 | HA   | THR | 35 | 31.145 | 48.145 | 12.660 | 0.00 | 0.00 |
| ATOM | 560 | CB   | THR | 35 | 30.127 | 47.342 | 10.987 | 0.00 | 0.00 |
| ATOM | 561 | HB   | THR | 35 | 30.348 | 46.739 | 10.133 | 0.00 | 0.00 |
| ATOM | 562 | CG2  | THR | 35 | 29.016 | 46.688 | 11.770 | 0.00 | 0.00 |
| ATOM | 563 | 1HG2 | THR | 35 | 28.709 | 46.560 | 11.928 | 0.00 | 0.00 |
| ATOM | 564 | 2HG2 | THR | 35 | 28.756 | 46.474 | 11.939 | 0.00 | 0.00 |
| ATOM | 565 | 3HG2 | THR | 35 | 28.767 | 46.544 | 12.005 | 0.00 | 0.00 |
| ATOM | 566 | OG1  | THR | 35 | 29.609 | 48.558 | 10.548 | 0.00 | 0.00 |
| ATOM | 567 | HG1  | THR | 35 | 30.182 | 48.913 | 9.925  | 0.00 | 0.00 |
| ATOM | 568 | C    | THR | 35 | 31.936 | 46.232 | 12.296 | 0.00 | 0.00 |
| ATOM | 569 | O    | THR | 35 | 31.603 | 45.826 | 13.391 | 0.00 | 0.00 |

|      |     |      |     |    |        |        |        |      |      |
|------|-----|------|-----|----|--------|--------|--------|------|------|
| ATOM | 570 | N    | GLU | 36 | 32.809 | 45.571 | 11.553 | 0.00 | 0.00 |
| ATOM | 571 | H    | GLU | 36 | 33.050 | 45.942 | 10.665 | 0.00 | 0.00 |
| ATOM | 572 | CA   | GLU | 36 | 33.479 | 44.359 | 12.014 | 0.00 | 0.00 |
| ATOM | 573 | HA   | GLU | 36 | 32.731 | 43.677 | 12.376 | 0.00 | 0.00 |
| ATOM | 574 | CB   | GLU | 36 | 34.197 | 43.684 | 10.861 | 0.00 | 0.00 |
| ATOM | 575 | HB2  | GLU | 36 | 34.232 | 43.299 | 10.718 | 0.00 | 0.00 |
| ATOM | 576 | HB3  | GLU | 36 | 34.185 | 43.693 | 10.455 | 0.00 | 0.00 |
| ATOM | 577 | CG   | GLU | 36 | 34.869 | 43.465 | 10.432 | 0.00 | 0.00 |
| ATOM | 578 | HG2  | GLU | 36 | 34.656 | 43.730 | 10.529 | 0.00 | 0.00 |
| ATOM | 579 | HG3  | GLU | 36 | 34.905 | 43.530 | 10.633 | 0.00 | 0.00 |
| ATOM | 580 | CD   | GLU | 36 | 35.775 | 42.781 | 9.601  | 0.00 | 0.00 |
| ATOM | 581 | OE1  | GLU | 36 | 36.120 | 42.514 | 9.256  | 0.00 | 0.00 |
| ATOM | 582 | OE2  | GLU | 36 | 36.142 | 42.481 | 9.296  | 0.00 | 0.00 |
| ATOM | 583 | C    | GLU | 36 | 34.429 | 44.611 | 13.186 | 0.00 | 0.00 |
| ATOM | 584 | O    | GLU | 36 | 34.505 | 43.806 | 14.089 | 0.00 | 0.00 |
| ATOM | 585 | N    | GLU | 37 | 35.103 | 45.749 | 13.218 | 0.00 | 0.00 |
| ATOM | 586 | H    | GLU | 37 | 34.950 | 46.401 | 12.489 | 0.00 | 0.00 |
| ATOM | 587 | CA   | GLU | 37 | 35.985 | 46.140 | 14.312 | 0.00 | 0.00 |
| ATOM | 588 | HA   | GLU | 37 | 36.578 | 45.283 | 14.591 | 0.00 | 0.00 |
| ATOM | 589 | CB   | GLU | 37 | 36.920 | 47.252 | 13.844 | 0.00 | 0.00 |
| ATOM | 590 | HB2  | GLU | 37 | 36.945 | 47.360 | 13.064 | 0.00 | 0.00 |
| ATOM | 591 | HB3  | GLU | 37 | 36.734 | 47.983 | 14.090 | 0.00 | 0.00 |
| ATOM | 592 | CG   | GLU | 37 | 38.077 | 47.281 | 14.074 | 0.00 | 0.00 |
| ATOM | 593 | HG2  | GLU | 37 | 38.224 | 47.793 | 13.686 | 0.00 | 0.00 |
| ATOM | 594 | HG3  | GLU | 37 | 38.090 | 47.542 | 14.666 | 0.00 | 0.00 |
| ATOM | 595 | CD   | GLU | 37 | 39.022 | 46.303 | 14.006 | 0.00 | 0.00 |
| ATOM | 596 | OE1  | GLU | 37 | 39.387 | 45.859 | 14.014 | 0.00 | 0.00 |
| ATOM | 597 | OE2  | GLU | 37 | 39.373 | 45.923 | 13.936 | 0.00 | 0.00 |
| ATOM | 598 | C    | GLU | 37 | 35.200 | 46.554 | 15.554 | 0.00 | 0.00 |
| ATOM | 599 | O    | GLU | 37 | 35.563 | 46.180 | 16.653 | 0.00 | 0.00 |
| ATOM | 600 | N    | VAL | 38 | 34.083 | 47.250 | 15.384 | 0.00 | 0.00 |
| ATOM | 601 | H    | VAL | 38 | 33.866 | 47.546 | 14.462 | 0.00 | 0.00 |
| ATOM | 602 | CA   | VAL | 38 | 33.139 | 47.564 | 16.460 | 0.00 | 0.00 |
| ATOM | 603 | HA   | VAL | 38 | 33.678 | 48.052 | 17.256 | 0.00 | 0.00 |
| ATOM | 604 | CB   | VAL | 38 | 32.037 | 48.520 | 15.982 | 0.00 | 0.00 |
| ATOM | 605 | HB   | VAL | 38 | 31.571 | 48.112 | 15.146 | 0.00 | 0.00 |
| ATOM | 606 | CG1  | VAL | 38 | 30.990 | 48.773 | 16.997 | 0.00 | 0.00 |
| ATOM | 607 | 1HG1 | VAL | 38 | 30.714 | 48.816 | 17.234 | 0.00 | 0.00 |
| ATOM | 608 | 2HG1 | VAL | 38 | 30.745 | 48.840 | 17.265 | 0.00 | 0.00 |
| ATOM | 609 | 3HG1 | VAL | 38 | 30.726 | 48.851 | 17.221 | 0.00 | 0.00 |
| ATOM | 610 | CG2  | VAL | 38 | 32.569 | 49.846 | 15.599 | 0.00 | 0.00 |
| ATOM | 611 | 1HG2 | VAL | 38 | 32.686 | 50.169 | 15.487 | 0.00 | 0.00 |
| ATOM | 612 | 2HG2 | VAL | 38 | 32.690 | 50.183 | 15.514 | 0.00 | 0.00 |
| ATOM | 613 | 3HG2 | VAL | 38 | 32.712 | 50.164 | 15.497 | 0.00 | 0.00 |
| ATOM | 614 | C    | VAL | 38 | 32.540 | 46.293 | 17.045 | 0.00 | 0.00 |
| ATOM | 615 | O    | VAL | 38 | 32.529 | 46.142 | 18.253 | 0.00 | 0.00 |
| ATOM | 616 | N    | PHE | 39 | 32.090 | 45.352 | 16.222 | 0.00 | 0.00 |
| ATOM | 617 | H    | PHE | 39 | 32.125 | 45.527 | 15.242 | 0.00 | 0.00 |
| ATOM | 618 | CA   | PHE | 39 | 31.447 | 44.125 | 16.684 | 0.00 | 0.00 |
| ATOM | 619 | HA   | PHE | 39 | 30.689 | 44.401 | 17.397 | 0.00 | 0.00 |
| ATOM | 620 | CB   | PHE | 39 | 30.749 | 43.428 | 15.528 | 0.00 | 0.00 |
| ATOM | 621 | HB2  | PHE | 39 | 30.123 | 44.131 | 15.026 | 0.00 | 0.00 |
| ATOM | 622 | HB3  | PHE | 39 | 31.475 | 43.101 | 14.822 | 0.00 | 0.00 |
| ATOM | 623 | CG   | PHE | 39 | 29.901 | 42.263 | 15.941 | 0.00 | 0.00 |
| ATOM | 624 | CD1  | PHE | 39 | 28.961 | 42.190 | 16.352 | 0.00 | 0.00 |
| ATOM | 625 | HD1  | PHE | 39 | 28.841 | 42.955 | 16.369 | 0.00 | 0.00 |
| ATOM | 626 | CE1  | PHE | 39 | 28.182 | 41.120 | 16.748 | 0.00 | 0.00 |
| ATOM | 627 | HE1  | PHE | 39 | 27.470 | 41.071 | 17.066 | 0.00 | 0.00 |
| ATOM | 628 | CZ   | PHE | 39 | 28.336 | 40.115 | 16.730 | 0.00 | 0.00 |
| ATOM | 629 | HZ   | PHE | 39 | 27.746 | 39.294 | 17.031 | 0.00 | 0.00 |
| ATOM | 630 | CE2  | PHE | 39 | 29.268 | 40.182 | 16.322 | 0.00 | 0.00 |
| ATOM | 631 | HE2  | PHE | 39 | 29.390 | 39.415 | 16.310 | 0.00 | 0.00 |
| ATOM | 632 | CD2  | PHE | 39 | 30.050 | 41.253 | 15.933 | 0.00 | 0.00 |
| ATOM | 633 | HD2  | PHE | 39 | 30.768 | 41.296 | 15.634 | 0.00 | 0.00 |
| ATOM | 634 | C    | PHE | 39 | 32.410 | 43.195 | 17.416 | 0.00 | 0.00 |
| ATOM | 635 | O    | PHE | 39 | 32.088 | 42.738 | 18.501 | 0.00 | 0.00 |
| ATOM | 636 | N    | ARG | 40 | 33.617 | 42.967 | 16.896 | 0.00 | 0.00 |
| ATOM | 637 | H    | ARG | 40 | 33.833 | 43.368 | 16.010 | 0.00 | 0.00 |
| ATOM | 638 | CA   | ARG | 40 | 34.642 | 42.167 | 17.582 | 0.00 | 0.00 |
| ATOM | 639 | HA   | ARG | 40 | 34.221 | 41.204 | 17.829 | 0.00 | 0.00 |
| ATOM | 640 | CB   | ARG | 40 | 35.853 | 41.953 | 16.674 | 0.00 | 0.00 |
| ATOM | 641 | HB2  | ARG | 40 | 36.121 | 42.833 | 16.227 | 0.00 | 0.00 |
| ATOM | 642 | HB3  | ARG | 40 | 36.645 | 41.640 | 17.242 | 0.00 | 0.00 |
| ATOM | 643 | CG   | ARG | 40 | 35.645 | 40.943 | 15.636 | 0.00 | 0.00 |
| ATOM | 644 | HG2  | ARG | 40 | 35.322 | 40.099 | 16.107 | 0.00 | 0.00 |
| ATOM | 645 | HG3  | ARG | 40 | 34.893 | 41.250 | 15.022 | 0.00 | 0.00 |
| ATOM | 646 | CD   | ARG | 40 | 36.867 | 40.592 | 14.812 | 0.00 | 0.00 |
| ATOM | 647 | HD2  | ARG | 40 | 37.669 | 40.496 | 15.409 | 0.00 | 0.00 |
| ATOM | 648 | HD3  | ARG | 40 | 36.717 | 39.693 | 14.392 | 0.00 | 0.00 |
| ATOM | 649 | NE   | ARG | 40 | 37.164 | 41.463 | 13.766 | 0.00 | 0.00 |
| ATOM | 650 | HE   | ARG | 40 | 36.804 | 41.290 | 12.988 | 0.00 | 0.00 |
| ATOM | 651 | CZ   | ARG | 40 | 37.851 | 42.447 | 13.704 | 0.00 | 0.00 |
| ATOM | 652 | NH1  | ARG | 40 | 38.440 | 42.787 | 14.604 | 0.00 | 0.00 |
| ATOM | 653 | 1HH1 | ARG | 40 | 38.508 | 42.233 | 15.349 | 0.00 | 0.00 |
| ATOM | 654 | 2HH1 | ARG | 40 | 38.896 | 43.571 | 14.521 | 0.00 | 0.00 |
| ATOM | 655 | NH2  | ARG | 40 | 37.971 | 43.124 | 12.701 | 0.00 | 0.00 |
| ATOM | 656 | 1HH2 | ARG | 40 | 37.599 | 42.866 | 11.956 | 0.00 | 0.00 |
| ATOM | 657 | 2HH2 | ARG | 40 | 38.501 | 43.865 | 12.660 | 0.00 | 0.00 |
| ATOM | 658 | C    | ARG | 40 | 35.053 | 42.776 | 18.917 | 0.00 | 0.00 |
| ATOM | 659 | O    | ARG | 40 | 35.185 | 42.059 | 19.888 | 0.00 | 0.00 |
| ATOM | 660 | N    | SER | 41 | 35.172 | 44.092 | 18.990 | 0.00 | 0.00 |
| ATOM | 661 | H    | SER | 41 | 35.061 | 44.613 | 18.154 | 0.00 | 0.00 |
| ATOM | 662 | CA   | SER | 41 | 35.451 | 44.808 | 20.234 | 0.00 | 0.00 |
| ATOM | 663 | HA   | SER | 41 | 36.301 | 44.351 | 20.713 | 0.00 | 0.00 |
| ATOM | 664 | CB   | SER | 41 | 35.810 | 46.255 | 19.953 | 0.00 | 0.00 |
| ATOM | 665 | HB2  | SER | 41 | 35.156 | 46.720 | 19.547 | 0.00 | 0.00 |
| ATOM | 666 | HB3  | SER | 41 | 35.993 | 46.723 | 20.704 | 0.00 | 0.00 |
| ATOM | 667 | OG   | SER | 41 | 36.756 | 46.411 | 19.266 | 0.00 | 0.00 |
| ATOM | 668 | HG   | SER | 41 | 36.515 | 46.404 | 18.479 | 0.00 | 0.00 |
| ATOM | 669 | C    | SER | 41 | 34.295 | 44.736 | 21.225 | 0.00 | 0.00 |
| ATOM | 670 | O    | SER | 41 | 34.518 | 44.501 | 22.393 | 0.00 | 0.00 |
| ATOM | 671 | N    | TYR | 42 | 33.057 | 44.872 | 20.772 | 0.00 | 0.00 |
| ATOM | 672 | H    | TYR | 42 | 32.930 | 45.076 | 19.808 | 0.00 | 0.00 |
| ATOM | 673 | CA   | TYR | 42 | 31.862 | 44.734 | 21.598 | 0.00 | 0.00 |
| ATOM | 674 | HA   | TYR | 42 | 31.931 | 45.429 | 22.421 | 0.00 | 0.00 |

|      |     |      |     |    |        |        |        |      |      |
|------|-----|------|-----|----|--------|--------|--------|------|------|
| ATOM | 675 | CB   | TYR | 42 | 30.633 | 45.103 | 20.770 | 0.00 | 0.00 |
| ATOM | 676 | HB2  | TYR | 42 | 30.695 | 46.133 | 20.506 | 0.00 | 0.00 |
| ATOM | 677 | HB3  | TYR | 42 | 30.652 | 44.549 | 19.862 | 0.00 | 0.00 |
| ATOM | 678 | CG   | TYR | 42 | 29.306 | 44.872 | 21.424 | 0.00 | 0.00 |
| ATOM | 679 | CD1  | TYR | 42 | 28.804 | 45.310 | 22.201 | 0.00 | 0.00 |
| ATOM | 680 | HD1  | TYR | 42 | 29.365 | 45.802 | 22.339 | 0.00 | 0.00 |
| ATOM | 681 | CE1  | TYR | 42 | 27.573 | 45.104 | 22.797 | 0.00 | 0.00 |
| ATOM | 682 | HE1  | TYR | 42 | 27.184 | 45.440 | 23.384 | 0.00 | 0.00 |
| ATOM | 683 | CZ   | TYR | 42 | 26.840 | 44.460 | 22.620 | 0.00 | 0.00 |
| ATOM | 684 | OH   | TYR | 42 | 25.658 | 44.262 | 23.192 | 0.00 | 0.00 |
| ATOM | 685 | HH   | TYR | 42 | 25.404 | 44.450 | 23.552 | 0.00 | 0.00 |
| ATOM | 686 | CE2  | TYR | 42 | 27.342 | 44.022 | 21.844 | 0.00 | 0.00 |
| ATOM | 687 | HE2  | TYR | 42 | 26.773 | 43.534 | 21.712 | 0.00 | 0.00 |
| ATOM | 688 | CD2  | TYR | 42 | 28.572 | 44.225 | 21.246 | 0.00 | 0.00 |
| ATOM | 689 | HD2  | TYR | 42 | 28.949 | 43.885 | 20.653 | 0.00 | 0.00 |
| ATOM | 690 | C    | TYR | 42 | 31.743 | 43.338 | 22.205 | 0.00 | 0.00 |
| ATOM | 691 | O    | TYR | 42 | 31.575 | 43.222 | 23.406 | 0.00 | 0.00 |
| ATOM | 692 | N    | VAL | 43 | 31.909 | 42.281 | 21.414 | 0.00 | 0.00 |
| ATOM | 693 | H    | VAL | 43 | 32.047 | 42.444 | 20.442 | 0.00 | 0.00 |
| ATOM | 694 | CA   | VAL | 43 | 31.877 | 40.895 | 21.892 | 0.00 | 0.00 |
| ATOM | 695 | HA   | VAL | 43 | 30.935 | 40.734 | 22.386 | 0.00 | 0.00 |
| ATOM | 696 | CB   | VAL | 43 | 31.970 | 39.911 | 20.723 | 0.00 | 0.00 |
| ATOM | 697 | HB   | VAL | 43 | 32.699 | 40.133 | 20.184 | 0.00 | 0.00 |
| ATOM | 698 | CG1  | VAL | 43 | 32.134 | 38.612 | 21.042 | 0.00 | 0.00 |
| ATOM | 699 | 1HG1 | VAL | 43 | 32.253 | 38.297 | 21.110 | 0.00 | 0.00 |
| ATOM | 700 | 2HG1 | VAL | 43 | 32.132 | 38.301 | 21.176 | 0.00 | 0.00 |
| ATOM | 701 | 3HG1 | VAL | 43 | 32.152 | 38.281 | 21.058 | 0.00 | 0.00 |
| ATOM | 702 | CG2  | VAL | 43 | 30.895 | 39.878 | 19.885 | 0.00 | 0.00 |
| ATOM | 703 | 1HG2 | VAL | 43 | 30.640 | 39.866 | 19.659 | 0.00 | 0.00 |
| ATOM | 704 | 2HG2 | VAL | 43 | 30.628 | 39.855 | 19.683 | 0.00 | 0.00 |
| ATOM | 705 | 3HG2 | VAL | 43 | 30.632 | 39.889 | 19.675 | 0.00 | 0.00 |
| ATOM | 706 | C    | VAL | 43 | 32.953 | 40.638 | 22.939 | 0.00 | 0.00 |
| ATOM | 707 | O    | VAL | 43 | 32.664 | 40.051 | 23.965 | 0.00 | 0.00 |
| ATOM | 708 | N    | PHE | 44 | 34.167 | 41.126 | 22.730 | 0.00 | 0.00 |
| ATOM | 709 | H    | PHE | 44 | 34.343 | 41.597 | 21.874 | 0.00 | 0.00 |
| ATOM | 710 | CA   | PHE | 44 | 35.256 | 40.994 | 23.683 | 0.00 | 0.00 |
| ATOM | 711 | HA   | PHE | 44 | 35.362 | 39.952 | 23.934 | 0.00 | 0.00 |
| ATOM | 712 | CB   | PHE | 44 | 36.554 | 41.451 | 23.033 | 0.00 | 0.00 |
| ATOM | 713 | HB2  | PHE | 44 | 36.722 | 40.880 | 22.167 | 0.00 | 0.00 |
| ATOM | 714 | HB3  | PHE | 44 | 36.466 | 42.451 | 22.721 | 0.00 | 0.00 |
| ATOM | 715 | CG   | PHE | 44 | 37.744 | 41.337 | 23.894 | 0.00 | 0.00 |
| ATOM | 716 | CD1  | PHE | 44 | 38.383 | 40.279 | 24.024 | 0.00 | 0.00 |
| ATOM | 717 | HD1  | PHE | 44 | 38.043 | 39.553 | 23.503 | 0.00 | 0.00 |
| ATOM | 718 | CE1  | PHE | 44 | 39.468 | 40.170 | 24.828 | 0.00 | 0.00 |
| ATOM | 719 | HE1  | PHE | 44 | 39.952 | 39.362 | 24.922 | 0.00 | 0.00 |
| ATOM | 720 | CZ   | PHE | 44 | 39.919 | 41.116 | 25.507 | 0.00 | 0.00 |
| ATOM | 721 | HZ   | PHE | 44 | 40.747 | 41.034 | 26.122 | 0.00 | 0.00 |
| ATOM | 722 | CE2  | PHE | 44 | 39.289 | 42.175 | 25.379 | 0.00 | 0.00 |
| ATOM | 723 | HE2  | PHE | 44 | 39.635 | 42.903 | 25.895 | 0.00 | 0.00 |
| ATOM | 724 | CD2  | PHE | 44 | 38.205 | 42.288 | 24.574 | 0.00 | 0.00 |
| ATOM | 725 | HD2  | PHE | 44 | 37.730 | 43.106 | 24.478 | 0.00 | 0.00 |
| ATOM | 726 | C    | PHE | 44 | 34.981 | 41.731 | 24.990 | 0.00 | 0.00 |
| ATOM | 727 | O    | PHE | 44 | 35.018 | 41.124 | 26.046 | 0.00 | 0.00 |
| ATOM | 728 | N    | TYR | 45 | 34.658 | 43.017 | 24.942 | 0.00 | 0.00 |
| ATOM | 729 | H    | TYR | 45 | 34.620 | 43.465 | 24.056 | 0.00 | 0.00 |
| ATOM | 730 | CA   | TYR | 45 | 34.467 | 43.825 | 26.139 | 0.00 | 0.00 |
| ATOM | 731 | HA   | TYR | 45 | 35.274 | 43.601 | 26.818 | 0.00 | 0.00 |
| ATOM | 732 | CB   | TYR | 45 | 34.555 | 45.309 | 25.806 | 0.00 | 0.00 |
| ATOM | 733 | HB2  | TYR | 45 | 33.982 | 45.528 | 24.992 | 0.00 | 0.00 |
| ATOM | 734 | HB3  | TYR | 45 | 34.170 | 45.852 | 26.578 | 0.00 | 0.00 |
| ATOM | 735 | CG   | TYR | 45 | 35.879 | 45.818 | 25.585 | 0.00 | 0.00 |
| ATOM | 736 | CD1  | TYR | 45 | 36.738 | 45.783 | 26.502 | 0.00 | 0.00 |
| ATOM | 737 | HD1  | TYR | 45 | 36.460 | 45.410 | 27.360 | 0.00 | 0.00 |
| ATOM | 738 | CE1  | TYR | 45 | 37.963 | 46.236 | 26.304 | 0.00 | 0.00 |
| ATOM | 739 | HE1  | TYR | 45 | 38.612 | 46.201 | 27.006 | 0.00 | 0.00 |
| ATOM | 740 | CZ   | TYR | 45 | 38.337 | 46.735 | 25.188 | 0.00 | 0.00 |
| ATOM | 741 | OH   | TYR | 45 | 39.509 | 47.180 | 24.996 | 0.00 | 0.00 |
| ATOM | 742 | HH   | TYR | 45 | 40.014 | 47.062 | 25.637 | 0.00 | 0.00 |
| ATOM | 743 | CE2  | TYR | 45 | 37.480 | 46.788 | 24.276 | 0.00 | 0.00 |
| ATOM | 744 | HE2  | TYR | 45 | 37.769 | 47.180 | 23.432 | 0.00 | 0.00 |
| ATOM | 745 | CD2  | TYR | 45 | 36.255 | 46.334 | 24.476 | 0.00 | 0.00 |
| ATOM | 746 | HD2  | TYR | 45 | 35.602 | 46.386 | 23.778 | 0.00 | 0.00 |
| ATOM | 747 | C    | TYR | 45 | 33.193 | 43.481 | 26.901 | 0.00 | 0.00 |
| ATOM | 748 | O    | TYR | 45 | 33.216 | 43.475 | 28.115 | 0.00 | 0.00 |
| ATOM | 749 | N    | ARG | 46 | 32.108 | 43.107 | 26.234 | 0.00 | 0.00 |
| ATOM | 750 | H    | ARG | 46 | 32.133 | 43.133 | 25.242 | 0.00 | 0.00 |
| ATOM | 751 | CA   | ARG | 46 | 30.888 | 42.644 | 26.897 | 0.00 | 0.00 |
| ATOM | 752 | HA   | ARG | 46 | 30.655 | 43.351 | 27.673 | 0.00 | 0.00 |
| ATOM | 753 | CB   | ARG | 46 | 29.731 | 42.617 | 25.905 | 0.00 | 0.00 |
| ATOM | 754 | HB2  | ARG | 46 | 29.704 | 43.504 | 25.383 | 0.00 | 0.00 |
| ATOM | 755 | HB3  | ARG | 46 | 29.881 | 41.867 | 25.216 | 0.00 | 0.00 |
| ATOM | 756 | CG   | ARG | 46 | 28.395 | 42.407 | 26.476 | 0.00 | 0.00 |
| ATOM | 757 | HG2  | ARG | 46 | 27.744 | 42.342 | 25.716 | 0.00 | 0.00 |
| ATOM | 758 | HG3  | ARG | 46 | 28.394 | 41.517 | 26.946 | 0.00 | 0.00 |
| ATOM | 759 | CD   | ARG | 46 | 27.899 | 43.451 | 27.401 | 0.00 | 0.00 |
| ATOM | 760 | HD2  | ARG | 46 | 28.615 | 43.695 | 28.029 | 0.00 | 0.00 |
| ATOM | 761 | HD3  | ARG | 46 | 27.664 | 44.272 | 26.901 | 0.00 | 0.00 |
| ATOM | 762 | NE   | ARG | 46 | 26.792 | 43.066 | 28.104 | 0.00 | 0.00 |
| ATOM | 763 | HE   | ARG | 46 | 26.114 | 42.819 | 27.686 | 0.00 | 0.00 |
| ATOM | 764 | CZ   | ARG | 46 | 26.606 | 42.954 | 29.235 | 0.00 | 0.00 |
| ATOM | 765 | NH1  | ARG | 46 | 27.359 | 43.276 | 29.909 | 0.00 | 0.00 |
| ATOM | 766 | 1HH1 | ARG | 46 | 28.086 | 43.703 | 29.594 | 0.00 | 0.00 |
| ATOM | 767 | 2HH1 | ARG | 46 | 27.155 | 43.177 | 30.761 | 0.00 | 0.00 |
| ATOM | 768 | NH2  | ARG | 46 | 25.633 | 42.502 | 29.730 | 0.00 | 0.00 |
| ATOM | 769 | 1HH2 | ARG | 46 | 25.020 | 42.245 | 29.261 | 0.00 | 0.00 |
| ATOM | 770 | 2HH2 | ARG | 46 | 25.510 | 42.414 | 30.589 | 0.00 | 0.00 |
| ATOM | 771 | C    | ARG | 46 | 31.100 | 41.312 | 27.604 | 0.00 | 0.00 |
| ATOM | 772 | O    | ARG | 46 | 30.669 | 41.164 | 28.719 | 0.00 | 0.00 |
| ATOM | 773 | N    | HIP | 47 | 31.846 | 40.391 | 27.028 | 0.00 | 0.00 |
| ATOM | 774 | H    | HIP | 47 | 32.159 | 40.566 | 26.109 | 0.00 | 0.00 |
| ATOM | 775 | CA   | HIP | 47 | 32.215 | 39.138 | 27.686 | 0.00 | 0.00 |
| ATOM | 776 | HA   | HIP | 47 | 31.318 | 38.705 | 28.097 | 0.00 | 0.00 |
| ATOM | 777 | CB   | HIP | 47 | 32.774 | 38.165 | 26.658 | 0.00 | 0.00 |
| ATOM | 778 | HB2  | HIP | 47 | 32.071 | 38.060 | 25.860 | 0.00 | 0.00 |
| ATOM | 779 | HB3  | HIP | 47 | 33.672 | 38.565 | 26.238 | 0.00 | 0.00 |

|      |     |      |     |    |        |        |        |      |      |
|------|-----|------|-----|----|--------|--------|--------|------|------|
| ATOM | 780 | CG   | HIP | 47 | 33.056 | 36.804 | 27.194 | 0.00 | 0.00 |
| ATOM | 781 | ND1  | HIP | 47 | 32.407 | 36.029 | 27.834 | 0.00 | 0.00 |
| ATOM | 782 | HD1  | HIP | 47 | 31.666 | 36.279 | 28.068 | 0.00 | 0.00 |
| ATOM | 783 | CE1  | HIP | 47 | 32.948 | 34.892 | 28.138 | 0.00 | 0.00 |
| ATOM | 784 | HE1  | HIP | 47 | 32.656 | 34.098 | 28.652 | 0.00 | 0.00 |
| ATOM | 785 | NE2  | HIP | 47 | 33.917 | 34.920 | 27.707 | 0.00 | 0.00 |
| ATOM | 786 | HE2  | HIP | 47 | 34.484 | 34.201 | 27.800 | 0.00 | 0.00 |
| ATOM | 787 | CD2  | HIP | 47 | 33.999 | 36.113 | 27.119 | 0.00 | 0.00 |
| ATOM | 788 | HD2  | HIP | 47 | 34.676 | 36.444 | 26.687 | 0.00 | 0.00 |
| ATOM | 789 | C    | HIP | 47 | 33.156 | 39.343 | 28.866 | 0.00 | 0.00 |
| ATOM | 790 | O    | HIP | 47 | 32.983 | 38.707 | 29.875 | 0.00 | 0.00 |
| ATOM | 791 | N    | GLN | 48 | 34.091 | 40.274 | 28.791 | 0.00 | 0.00 |
| ATOM | 792 | H    | GLN | 48 | 34.214 | 40.735 | 27.928 | 0.00 | 0.00 |
| ATOM | 793 | CA   | GLN | 48 | 34.971 | 40.628 | 29.900 | 0.00 | 0.00 |
| ATOM | 794 | HA   | GLN | 48 | 35.432 | 39.730 | 30.264 | 0.00 | 0.00 |
| ATOM | 795 | CB   | GLN | 48 | 36.068 | 41.550 | 29.405 | 0.00 | 0.00 |
| ATOM | 796 | HB2  | GLN | 48 | 36.279 | 41.470 | 28.683 | 0.00 | 0.00 |
| ATOM | 797 | HB3  | GLN | 48 | 35.902 | 42.275 | 29.423 | 0.00 | 0.00 |
| ATOM | 798 | CG   | GLN | 48 | 37.127 | 41.613 | 29.847 | 0.00 | 0.00 |
| ATOM | 799 | HG2  | GLN | 48 | 37.002 | 41.708 | 30.204 | 0.00 | 0.00 |
| ATOM | 800 | HG3  | GLN | 48 | 37.337 | 41.290 | 29.909 | 0.00 | 0.00 |
| ATOM | 801 | CD   | GLN | 48 | 38.096 | 41.995 | 29.721 | 0.00 | 0.00 |
| ATOM | 802 | OE1  | GLN | 48 | 38.285 | 42.285 | 29.498 | 0.00 | 0.00 |
| ATOM | 803 | NE2  | GLN | 48 | 38.749 | 42.013 | 29.866 | 0.00 | 0.00 |
| ATOM | 804 | 1HE2 | GLN | 48 | 39.380 | 42.253 | 29.798 | 0.00 | 0.00 |
| ATOM | 805 | 2HE2 | GLN | 48 | 38.614 | 41.780 | 30.060 | 0.00 | 0.00 |
| ATOM | 806 | C    | GLN | 48 | 34.213 | 41.235 | 31.074 | 0.00 | 0.00 |
| ATOM | 807 | O    | GLN | 48 | 34.457 | 40.873 | 32.199 | 0.00 | 0.00 |
| ATOM | 808 | N    | GLN | 49 | 33.251 | 42.099 | 30.827 | 0.00 | 0.00 |
| ATOM | 809 | H    | GLN | 49 | 33.111 | 42.379 | 29.891 | 0.00 | 0.00 |
| ATOM | 810 | CA   | GLN | 49 | 32.423 | 42.703 | 31.855 | 0.00 | 0.00 |
| ATOM | 811 | HA   | GLN | 49 | 33.058 | 43.118 | 32.609 | 0.00 | 0.00 |
| ATOM | 812 | CB   | GLN | 49 | 31.626 | 43.823 | 31.240 | 0.00 | 0.00 |
| ATOM | 813 | HB2  | GLN | 49 | 31.550 | 43.917 | 30.696 | 0.00 | 0.00 |
| ATOM | 814 | HB3  | GLN | 49 | 31.088 | 43.915 | 31.303 | 0.00 | 0.00 |
| ATOM | 815 | CG   | GLN | 49 | 31.647 | 44.711 | 31.270 | 0.00 | 0.00 |
| ATOM | 816 | HG2  | GLN | 49 | 31.701 | 44.824 | 31.726 | 0.00 | 0.00 |
| ATOM | 817 | HG3  | GLN | 49 | 32.035 | 44.641 | 31.195 | 0.00 | 0.00 |
| ATOM | 818 | CD   | GLN | 49 | 31.073 | 45.561 | 30.776 | 0.00 | 0.00 |
| ATOM | 819 | OE1  | GLN | 49 | 30.645 | 45.647 | 30.337 | 0.00 | 0.00 |
| ATOM | 820 | NE2  | GLN | 49 | 31.039 | 46.217 | 30.817 | 0.00 | 0.00 |
| ATOM | 821 | 1HE2 | GLN | 49 | 30.662 | 46.760 | 30.495 | 0.00 | 0.00 |
| ATOM | 822 | 2HE2 | GLN | 49 | 31.377 | 46.171 | 31.189 | 0.00 | 0.00 |
| ATOM | 823 | C    | GLN | 49 | 31.521 | 41.707 | 32.552 | 0.00 | 0.00 |
| ATOM | 824 | O    | GLN | 49 | 31.311 | 41.810 | 33.732 | 0.00 | 0.00 |
| ATOM | 825 | N    | GLU | 50 | 31.027 | 40.712 | 31.859 | 0.00 | 0.00 |
| ATOM | 826 | H    | GLU | 50 | 31.192 | 40.699 | 30.891 | 0.00 | 0.00 |
| ATOM | 827 | CA   | GLU | 50 | 30.230 | 39.649 | 32.434 | 0.00 | 0.00 |
| ATOM | 828 | HA   | GLU | 50 | 29.526 | 40.079 | 33.113 | 0.00 | 0.00 |
| ATOM | 829 | CB   | GLU | 50 | 29.449 | 38.946 | 31.348 | 0.00 | 0.00 |
| ATOM | 830 | HB2  | GLU | 50 | 29.749 | 38.971 | 30.656 | 0.00 | 0.00 |
| ATOM | 831 | HB3  | GLU | 50 | 29.360 | 38.210 | 31.447 | 0.00 | 0.00 |
| ATOM | 832 | CG   | GLU | 50 | 28.358 | 39.196 | 31.076 | 0.00 | 0.00 |
| ATOM | 833 | HG2  | GLU | 50 | 28.129 | 39.222 | 31.705 | 0.00 | 0.00 |
| ATOM | 834 | HG3  | GLU | 50 | 28.462 | 39.838 | 30.934 | 0.00 | 0.00 |
| ATOM | 835 | CD   | GLU | 50 | 27.424 | 38.553 | 30.161 | 0.00 | 0.00 |
| ATOM | 836 | OE1  | GLU | 50 | 26.892 | 38.363 | 29.927 | 0.00 | 0.00 |
| ATOM | 837 | OE2  | GLU | 50 | 27.196 | 38.225 | 29.665 | 0.00 | 0.00 |
| ATOM | 838 | C    | GLU | 50 | 31.048 | 38.673 | 33.248 | 0.00 | 0.00 |
| ATOM | 839 | O    | GLU | 50 | 30.550 | 38.093 | 34.150 | 0.00 | 0.00 |
| ATOM | 840 | N    | GLN | 51 | 32.311 | 38.526 | 32.988 | 0.00 | 0.00 |
| ATOM | 841 | H    | GLN | 51 | 32.654 | 38.996 | 32.216 | 0.00 | 0.00 |
| ATOM | 842 | CA   | GLN | 51 | 33.232 | 37.768 | 33.799 | 0.00 | 0.00 |
| ATOM | 843 | HA   | GLN | 51 | 32.742 | 36.898 | 34.147 | 0.00 | 0.00 |
| ATOM | 844 | CB   | GLN | 51 | 34.404 | 37.337 | 32.969 | 0.00 | 0.00 |
| ATOM | 845 | HB2  | GLN | 51 | 34.701 | 38.006 | 32.428 | 0.00 | 0.00 |
| ATOM | 846 | HB3  | GLN | 51 | 35.111 | 37.111 | 33.506 | 0.00 | 0.00 |
| ATOM | 847 | CG   | GLN | 51 | 34.255 | 36.291 | 32.159 | 0.00 | 0.00 |
| ATOM | 848 | HG2  | GLN | 51 | 33.974 | 35.724 | 32.572 | 0.00 | 0.00 |
| ATOM | 849 | HG3  | GLN | 51 | 33.714 | 36.451 | 31.629 | 0.00 | 0.00 |
| ATOM | 850 | CD   | GLN | 51 | 35.224 | 35.777 | 31.503 | 0.00 | 0.00 |
| ATOM | 851 | OE1  | GLN | 51 | 35.640 | 35.832 | 31.183 | 0.00 | 0.00 |
| ATOM | 852 | NE2  | GLN | 51 | 35.626 | 35.265 | 31.284 | 0.00 | 0.00 |
| ATOM | 853 | 1HE2 | GLN | 51 | 36.274 | 34.948 | 30.880 | 0.00 | 0.00 |
| ATOM | 854 | 2HE2 | GLN | 51 | 35.300 | 35.205 | 31.546 | 0.00 | 0.00 |
| ATOM | 855 | C    | GLN | 51 | 33.684 | 38.519 | 35.028 | 0.00 | 0.00 |
| ATOM | 856 | O    | GLN | 51 | 33.897 | 37.960 | 36.037 | 0.00 | 0.00 |
| ATOM | 857 | N    | GLU | 52 | 33.777 | 39.784 | 34.983 | 0.00 | 0.00 |
| ATOM | 858 | H    | GLU | 52 | 33.637 | 40.189 | 34.123 | 0.00 | 0.00 |
| ATOM | 859 | CA   | GLU | 52 | 34.087 | 40.616 | 36.115 | 0.00 | 0.00 |
| ATOM | 860 | HA   | GLU | 52 | 34.902 | 40.223 | 36.625 | 0.00 | 0.00 |
| ATOM | 861 | CB   | GLU | 52 | 34.461 | 41.946 | 35.660 | 0.00 | 0.00 |
| ATOM | 862 | HB2  | GLU | 52 | 34.565 | 42.040 | 35.049 | 0.00 | 0.00 |
| ATOM | 863 | HB3  | GLU | 52 | 34.069 | 42.424 | 35.741 | 0.00 | 0.00 |
| ATOM | 864 | CG   | GLU | 52 | 35.248 | 42.520 | 35.922 | 0.00 | 0.00 |
| ATOM | 865 | HG2  | GLU | 52 | 35.142 | 42.438 | 36.473 | 0.00 | 0.00 |
| ATOM | 866 | HG3  | GLU | 52 | 35.611 | 42.093 | 35.836 | 0.00 | 0.00 |
| ATOM | 867 | CD   | GLU | 52 | 35.695 | 43.771 | 35.556 | 0.00 | 0.00 |
| ATOM | 868 | OE1  | GLU | 52 | 35.873 | 44.268 | 35.366 | 0.00 | 0.00 |
| ATOM | 869 | OE2  | GLU | 52 | 35.882 | 44.272 | 35.461 | 0.00 | 0.00 |
| ATOM | 870 | C    | GLU | 52 | 33.000 | 40.686 | 37.096 | 0.00 | 0.00 |
| ATOM | 871 | O    | GLU | 52 | 33.213 | 40.871 | 38.225 | 0.00 | 0.00 |
| ATOM | 872 | N    | ALA | 53 | 31.840 | 40.468 | 36.693 | 0.00 | 0.00 |
| ATOM | 873 | H    | ALA | 53 | 31.724 | 40.350 | 35.758 | 0.00 | 0.00 |
| ATOM | 874 | CA   | ALA | 53 | 30.728 | 40.405 | 37.516 | 0.00 | 0.00 |
| ATOM | 875 | HA   | ALA | 53 | 30.710 | 41.205 | 38.126 | 0.00 | 0.00 |
| ATOM | 876 | CB   | ALA | 53 | 29.590 | 40.440 | 36.686 | 0.00 | 0.00 |
| ATOM | 877 | HB1  | ALA | 53 | 29.308 | 40.462 | 36.498 | 0.00 | 0.00 |
| ATOM | 878 | HB2  | ALA | 53 | 29.315 | 40.450 | 36.469 | 0.00 | 0.00 |
| ATOM | 879 | HB3  | ALA | 53 | 29.313 | 40.438 | 36.500 | 0.00 | 0.00 |
| ATOM | 880 | C    | ALA | 53 | 30.689 | 39.298 | 38.393 | 0.00 | 0.00 |
| ATOM | 881 | O    | ALA | 53 | 30.003 | 39.286 | 39.307 | 0.00 | 0.00 |
| ATOM | 882 | N    | GLU | 54 | 31.443 | 38.383 | 38.157 | 0.00 | 0.00 |
| ATOM | 883 | H    | GLU | 54 | 31.960 | 38.434 | 37.379 | 0.00 | 0.00 |
| ATOM | 884 | CA   | GLU | 54 | 31.603 | 37.324 | 38.975 | 0.00 | 0.00 |

|      |     |      |     |    |        |        |        |      |      |
|------|-----|------|-----|----|--------|--------|--------|------|------|
| ATOM | 885 | HA   | GLU | 54 | 30.794 | 37.183 | 39.520 | 0.00 | 0.00 |
| ATOM | 886 | CB   | GLU | 54 | 31.779 | 36.220 | 38.195 | 0.00 | 0.00 |
| ATOM | 887 | HB2  | GLU | 54 | 32.148 | 36.329 | 37.678 | 0.00 | 0.00 |
| ATOM | 888 | HB3  | GLU | 54 | 32.074 | 35.726 | 38.498 | 0.00 | 0.00 |
| ATOM | 889 | CG   | GLU | 54 | 31.064 | 35.612 | 37.702 | 0.00 | 0.00 |
| ATOM | 890 | HG2  | GLU | 54 | 30.762 | 35.677 | 37.855 | 0.00 | 0.00 |
| ATOM | 891 | HG3  | GLU | 54 | 31.053 | 35.797 | 37.429 | 0.00 | 0.00 |
| ATOM | 892 | CD   | GLU | 54 | 30.778 | 34.658 | 37.362 | 0.00 | 0.00 |
| ATOM | 893 | OE1  | GLU | 54 | 30.646 | 34.280 | 37.257 | 0.00 | 0.00 |
| ATOM | 894 | OE2  | GLU | 54 | 30.674 | 34.271 | 37.196 | 0.00 | 0.00 |
| ATOM | 895 | C    | GLU | 54 | 32.618 | 37.471 | 39.920 | 0.00 | 0.00 |
| ATOM | 896 | O    | GLU | 54 | 32.884 | 36.691 | 40.620 | 0.00 | 0.00 |
| ATOM | 897 | N    | GLY | 55 | 33.185 | 38.470 | 39.962 | 0.00 | 0.00 |
| ATOM | 898 | H    | GLY | 55 | 32.930 | 39.074 | 39.365 | 0.00 | 0.00 |
| ATOM | 899 | CA   | GLY | 55 | 34.121 | 38.761 | 40.844 | 0.00 | 0.00 |
| ATOM | 900 | HA2  | GLY | 55 | 34.065 | 39.505 | 41.050 | 0.00 | 0.00 |
| ATOM | 901 | HA3  | GLY | 55 | 33.996 | 38.343 | 41.514 | 0.00 | 0.00 |
| ATOM | 902 | C    | GLY | 55 | 35.357 | 38.666 | 40.633 | 0.00 | 0.00 |
| ATOM | 903 | O    | GLY | 55 | 35.914 | 38.809 | 41.358 | 0.00 | 0.00 |
| ATOM | 904 | N    | VAL | 56 | 35.794 | 38.417 | 39.655 | 0.00 | 0.00 |
| ATOM | 905 | H    | VAL | 56 | 35.287 | 38.332 | 39.103 | 0.00 | 0.00 |
| ATOM | 906 | CA   | VAL | 56 | 36.974 | 38.285 | 39.311 | 0.00 | 0.00 |
| ATOM | 907 | HA   | VAL | 56 | 37.321 | 38.214 | 40.040 | 0.00 | 0.00 |
| ATOM | 908 | CB   | VAL | 56 | 37.190 | 37.368 | 38.691 | 0.00 | 0.00 |
| ATOM | 909 | HB   | VAL | 56 | 37.619 | 37.504 | 38.342 | 0.00 | 0.00 |
| ATOM | 910 | CG1  | VAL | 56 | 37.361 | 36.723 | 39.100 | 0.00 | 0.00 |
| ATOM | 911 | 1HG1 | VAL | 56 | 37.379 | 36.586 | 39.185 | 0.00 | 0.00 |
| ATOM | 912 | 2HG1 | VAL | 56 | 37.430 | 36.550 | 39.201 | 0.00 | 0.00 |
| ATOM | 913 | 3HG1 | VAL | 56 | 37.411 | 36.555 | 39.204 | 0.00 | 0.00 |
| ATOM | 914 | CG2  | VAL | 56 | 36.698 | 36.862 | 38.125 | 0.00 | 0.00 |
| ATOM | 915 | 1HG2 | VAL | 56 | 36.587 | 36.726 | 37.955 | 0.00 | 0.00 |
| ATOM | 916 | 2HG2 | VAL | 56 | 36.579 | 36.728 | 38.002 | 0.00 | 0.00 |
| ATOM | 917 | 3HG2 | VAL | 56 | 36.577 | 36.754 | 37.996 | 0.00 | 0.00 |
| ATOM | 918 | C    | VAL | 56 | 37.566 | 39.153 | 38.633 | 0.00 | 0.00 |
| ATOM | 919 | O    | VAL | 56 | 37.118 | 39.631 | 38.014 | 0.00 | 0.00 |
| ATOM | 920 | N    | ALA | 57 | 38.577 | 39.356 | 38.741 | 0.00 | 0.00 |
| ATOM | 921 | H    | ALA | 57 | 38.894 | 38.940 | 39.265 | 0.00 | 0.00 |
| ATOM | 922 | CA   | ALA | 57 | 39.272 | 40.128 | 38.114 | 0.00 | 0.00 |
| ATOM | 923 | HA   | ALA | 57 | 38.728 | 40.781 | 37.928 | 0.00 | 0.00 |
| ATOM | 924 | CB   | ALA | 57 | 40.097 | 40.520 | 38.907 | 0.00 | 0.00 |
| ATOM | 925 | HB1  | ALA | 57 | 40.285 | 40.623 | 39.083 | 0.00 | 0.00 |
| ATOM | 926 | HB2  | ALA | 57 | 40.295 | 40.618 | 39.106 | 0.00 | 0.00 |
| ATOM | 927 | HB3  | ALA | 57 | 40.306 | 40.612 | 39.103 | 0.00 | 0.00 |
| ATOM | 928 | C    | ALA | 57 | 39.877 | 39.711 | 36.941 | 0.00 | 0.00 |
| ATOM | 929 | O    | ALA | 57 | 40.378 | 38.879 | 36.847 | 0.00 | 0.00 |
| ATOM | 930 | N    | ALA | 58 | 39.839 | 40.294 | 36.054 | 0.00 | 0.00 |
| ATOM | 931 | H    | ALA | 58 | 39.422 | 40.961 | 36.214 | 0.00 | 0.00 |
| ATOM | 932 | CA   | ALA | 58 | 40.339 | 40.057 | 34.856 | 0.00 | 0.00 |
| ATOM | 933 | HA   | ALA | 58 | 40.015 | 40.471 | 34.493 | 0.00 | 0.00 |
| ATOM | 934 | CB   | ALA | 58 | 41.212 | 40.346 | 34.789 | 0.00 | 0.00 |
| ATOM | 935 | HB1  | ALA | 58 | 41.472 | 40.405 | 34.785 | 0.00 | 0.00 |
| ATOM | 936 | HB2  | ALA | 58 | 41.408 | 40.452 | 34.780 | 0.00 | 0.00 |
| ATOM | 937 | HB3  | ALA | 58 | 41.388 | 40.395 | 34.745 | 0.00 | 0.00 |
| ATOM | 938 | C    | ALA | 58 | 40.375 | 39.086 | 34.116 | 0.00 | 0.00 |
| ATOM | 939 | O    | ALA | 58 | 41.089 | 38.746 | 33.716 | 0.00 | 0.00 |
| ATOM | 940 | N    | PRO | 59 | 39.622 | 38.613 | 33.930 | 0.00 | 0.00 |
| ATOM | 941 | CD   | PRO | 59 | 38.741 | 38.938 | 34.329 | 0.00 | 0.00 |
| ATOM | 942 | HD2  | PRO | 59 | 38.591 | 39.533 | 33.964 | 0.00 | 0.00 |
| ATOM | 943 | HD3  | PRO | 59 | 38.663 | 39.066 | 35.308 | 0.00 | 0.00 |
| ATOM | 944 | CG   | PRO | 59 | 38.130 | 38.196 | 33.858 | 0.00 | 0.00 |
| ATOM | 945 | HG2  | PRO | 59 | 37.888 | 38.337 | 33.121 | 0.00 | 0.00 |
| ATOM | 946 | HG3  | PRO | 59 | 37.635 | 38.125 | 34.487 | 0.00 | 0.00 |
| ATOM | 947 | CB   | PRO | 59 | 38.659 | 37.351 | 33.525 | 0.00 | 0.00 |
| ATOM | 948 | HB2  | PRO | 59 | 38.618 | 37.031 | 34.224 | 0.00 | 0.00 |
| ATOM | 949 | HB3  | PRO | 59 | 38.437 | 36.924 | 32.791 | 0.00 | 0.00 |
| ATOM | 950 | CA   | PRO | 59 | 39.585 | 37.659 | 33.297 | 0.00 | 0.00 |
| ATOM | 951 | HA   | PRO | 59 | 40.029 | 37.259 | 33.722 | 0.00 | 0.00 |
| ATOM | 952 | C    | PRO | 59 | 39.809 | 37.515 | 31.915 | 0.00 | 0.00 |
| ATOM | 953 | O    | PRO | 59 | 39.484 | 38.080 | 31.318 | 0.00 | 0.00 |
| ATOM | 954 | N    | ALA | 60 | 40.334 | 36.735 | 31.397 | 0.00 | 0.00 |
| ATOM | 955 | H    | ALA | 60 | 40.574 | 36.306 | 31.935 | 0.00 | 0.00 |
| ATOM | 956 | CA   | ALA | 60 | 40.544 | 36.411 | 30.094 | 0.00 | 0.00 |
| ATOM | 957 | HA   | ALA | 60 | 40.112 | 37.040 | 29.585 | 0.00 | 0.00 |
| ATOM | 958 | CB   | ALA | 60 | 41.810 | 36.511 | 29.875 | 0.00 | 0.00 |
| ATOM | 959 | HB1  | ALA | 60 | 42.107 | 36.566 | 29.830 | 0.00 | 0.00 |
| ATOM | 960 | HB2  | ALA | 60 | 42.117 | 36.514 | 29.849 | 0.00 | 0.00 |
| ATOM | 961 | HB3  | ALA | 60 | 42.123 | 36.527 | 29.779 | 0.00 | 0.00 |
| ATOM | 962 | C    | ALA | 60 | 40.087 | 35.159 | 29.630 | 0.00 | 0.00 |
| ATOM | 963 | O    | ALA | 60 | 40.127 | 34.388 | 30.261 | 0.00 | 0.00 |
| ATOM | 964 | N    | ASP | 61 | 39.665 | 34.940 | 28.525 | 0.00 | 0.00 |
| ATOM | 965 | H    | ASP | 61 | 39.659 | 35.601 | 28.054 | 0.00 | 0.00 |
| ATOM | 966 | CA   | ASP | 61 | 39.218 | 33.774 | 27.959 | 0.00 | 0.00 |
| ATOM | 967 | HA   | ASP | 61 | 38.955 | 33.187 | 28.720 | 0.00 | 0.00 |
| ATOM | 968 | CB   | ASP | 61 | 38.043 | 34.021 | 27.166 | 0.00 | 0.00 |
| ATOM | 969 | HB2  | ASP | 61 | 37.423 | 34.574 | 27.707 | 0.00 | 0.00 |
| ATOM | 970 | HB3  | ASP | 61 | 38.267 | 34.522 | 26.358 | 0.00 | 0.00 |
| ATOM | 971 | CG   | ASP | 61 | 37.379 | 32.860 | 26.758 | 0.00 | 0.00 |
| ATOM | 972 | OD1  | ASP | 61 | 37.167 | 32.409 | 26.536 | 0.00 | 0.00 |
| ATOM | 973 | OD2  | ASP | 61 | 37.062 | 32.395 | 26.670 | 0.00 | 0.00 |
| ATOM | 974 | C    | ASP | 61 | 40.225 | 33.132 | 27.161 | 0.00 | 0.00 |
| ATOM | 975 | O    | ASP | 61 | 40.770 | 33.721 | 26.405 | 0.00 | 0.00 |
| ATOM | 976 | N    | PRO | 62 | 40.487 | 31.946 | 27.280 | 0.00 | 0.00 |
| ATOM | 977 | CD   | PRO | 62 | 39.982 | 31.161 | 28.199 | 0.00 | 0.00 |
| ATOM | 978 | HD2  | PRO | 62 | 39.070 | 30.959 | 27.984 | 0.00 | 0.00 |
| ATOM | 979 | HD3  | PRO | 62 | 40.042 | 31.539 | 29.123 | 0.00 | 0.00 |
| ATOM | 980 | CG   | PRO | 62 | 40.722 | 30.039 | 28.134 | 0.00 | 0.00 |
| ATOM | 981 | HG2  | PRO | 62 | 40.251 | 29.404 | 27.959 | 0.00 | 0.00 |
| ATOM | 982 | HG3  | PRO | 62 | 41.120 | 29.941 | 28.864 | 0.00 | 0.00 |
| ATOM | 983 | CB   | PRO | 62 | 41.585 | 30.067 | 27.195 | 0.00 | 0.00 |
| ATOM | 984 | HB2  | PRO | 62 | 42.363 | 29.923 | 27.564 | 0.00 | 0.00 |
| ATOM | 985 | HB3  | PRO | 62 | 41.422 | 29.420 | 26.610 | 0.00 | 0.00 |
| ATOM | 986 | CA   | PRO | 62 | 41.489 | 31.309 | 26.614 | 0.00 | 0.00 |
| ATOM | 987 | HA   | PRO | 62 | 42.324 | 31.783 | 26.824 | 0.00 | 0.00 |
| ATOM | 988 | C    | PRO | 62 | 41.358 | 31.190 | 25.169 | 0.00 | 0.00 |
| ATOM | 989 | O    | PRO | 62 | 42.267 | 30.963 | 24.562 | 0.00 | 0.00 |

|      |      |      |     |    |        |        |        |      |      |
|------|------|------|-----|----|--------|--------|--------|------|------|
| ATOM | 990  | N    | GLU | 63 | 40.262 | 31.337 | 24.601 | 0.00 | 0.00 |
| ATOM | 991  | H    | GLU | 63 | 39.549 | 31.520 | 25.143 | 0.00 | 0.00 |
| ATOM | 992  | CA   | GLU | 63 | 40.024 | 31.218 | 23.228 | 0.00 | 0.00 |
| ATOM | 993  | HA   | GLU | 63 | 40.914 | 30.971 | 22.783 | 0.00 | 0.00 |
| ATOM | 994  | CB   | GLU | 63 | 39.104 | 30.137 | 22.968 | 0.00 | 0.00 |
| ATOM | 995  | HB2  | GLU | 63 | 38.531 | 30.080 | 23.512 | 0.00 | 0.00 |
| ATOM | 996  | HB3  | GLU | 63 | 38.673 | 30.206 | 22.263 | 0.00 | 0.00 |
| ATOM | 997  | CG   | GLU | 63 | 39.525 | 29.027 | 22.912 | 0.00 | 0.00 |
| ATOM | 998  | HG2  | GLU | 63 | 39.956 | 29.024 | 22.792 | 0.00 | 0.00 |
| ATOM | 999  | HG3  | GLU | 63 | 39.591 | 28.904 | 23.318 | 0.00 | 0.00 |
| ATOM | 1000 | CD   | GLU | 63 | 39.264 | 28.081 | 22.468 | 0.00 | 0.00 |
| ATOM | 1001 | OE1  | GLU | 63 | 39.167 | 27.712 | 22.289 | 0.00 | 0.00 |
| ATOM | 1002 | OE2  | GLU | 63 | 39.162 | 27.687 | 22.292 | 0.00 | 0.00 |
| ATOM | 1003 | C    | GLU | 63 | 39.567 | 32.457 | 22.569 | 0.00 | 0.00 |
| ATOM | 1004 | O    | GLU | 63 | 39.725 | 32.601 | 21.461 | 0.00 | 0.00 |
| ATOM | 1005 | N    | MET | 64 | 39.073 | 33.392 | 23.225 | 0.00 | 0.00 |
| ATOM | 1006 | H    | MET | 64 | 38.945 | 33.222 | 24.124 | 0.00 | 0.00 |
| ATOM | 1007 | CA   | MET | 64 | 38.677 | 34.635 | 22.671 | 0.00 | 0.00 |
| ATOM | 1008 | HA   | MET | 64 | 38.229 | 34.462 | 21.757 | 0.00 | 0.00 |
| ATOM | 1009 | CB   | MET | 64 | 37.660 | 35.282 | 23.494 | 0.00 | 0.00 |
| ATOM | 1010 | HB2  | MET | 64 | 37.394 | 34.816 | 24.066 | 0.00 | 0.00 |
| ATOM | 1011 | HB3  | MET | 64 | 37.926 | 35.912 | 23.880 | 0.00 | 0.00 |
| ATOM | 1012 | CG   | MET | 64 | 36.617 | 35.714 | 23.021 | 0.00 | 0.00 |
| ATOM | 1013 | HG2  | MET | 64 | 36.813 | 36.063 | 22.711 | 0.00 | 0.00 |
| ATOM | 1014 | HG3  | MET | 64 | 36.472 | 35.337 | 22.722 | 0.00 | 0.00 |
| ATOM | 1015 | SD   | MET | 64 | 35.297 | 36.296 | 23.396 | 0.00 | 0.00 |
| ATOM | 1016 | CE   | MET | 64 | 34.167 | 35.493 | 23.301 | 0.00 | 0.00 |
| ATOM | 1017 | HE1  | MET | 64 | 33.929 | 35.341 | 23.286 | 0.00 | 0.00 |
| ATOM | 1018 | HE2  | MET | 64 | 33.935 | 35.331 | 23.270 | 0.00 | 0.00 |
| ATOM | 1019 | HE3  | MET | 64 | 33.948 | 35.327 | 23.288 | 0.00 | 0.00 |
| ATOM | 1020 | C    | MET | 64 | 39.818 | 35.508 | 22.407 | 0.00 | 0.00 |
| ATOM | 1021 | O    | MET | 64 | 39.707 | 36.436 | 21.705 | 0.00 | 0.00 |
| ATOM | 1022 | N    | VAL | 65 | 40.943 | 35.182 | 22.897 | 0.00 | 0.00 |
| ATOM | 1023 | H    | VAL | 65 | 40.961 | 34.430 | 23.486 | 0.00 | 0.00 |
| ATOM | 1024 | CA   | VAL | 65 | 42.160 | 35.813 | 22.598 | 0.00 | 0.00 |
| ATOM | 1025 | HA   | VAL | 65 | 42.041 | 36.820 | 22.685 | 0.00 | 0.00 |
| ATOM | 1026 | CB   | VAL | 65 | 43.162 | 35.392 | 23.530 | 0.00 | 0.00 |
| ATOM | 1027 | HB   | VAL | 65 | 43.849 | 35.733 | 23.383 | 0.00 | 0.00 |
| ATOM | 1028 | CG1  | VAL | 65 | 43.036 | 35.641 | 24.619 | 0.00 | 0.00 |
| ATOM | 1029 | 1HG1 | VAL | 65 | 43.036 | 35.702 | 24.902 | 0.00 | 0.00 |
| ATOM | 1030 | 2HG1 | VAL | 65 | 43.009 | 35.678 | 24.876 | 0.00 | 0.00 |
| ATOM | 1031 | 3HG1 | VAL | 65 | 42.990 | 35.733 | 24.876 | 0.00 | 0.00 |
| ATOM | 1032 | CG2  | VAL | 65 | 43.426 | 34.296 | 23.626 | 0.00 | 0.00 |
| ATOM | 1033 | 1HG2 | VAL | 65 | 43.507 | 34.030 | 23.634 | 0.00 | 0.00 |
| ATOM | 1034 | 2HG2 | VAL | 65 | 43.525 | 34.017 | 23.684 | 0.00 | 0.00 |
| ATOM | 1035 | 3HG2 | VAL | 65 | 43.464 | 34.038 | 23.639 | 0.00 | 0.00 |
| ATOM | 1036 | C    | VAL | 65 | 42.625 | 35.655 | 21.252 | 0.00 | 0.00 |
| ATOM | 1037 | O    | VAL | 65 | 43.436 | 36.341 | 20.838 | 0.00 | 0.00 |
| ATOM | 1038 | N    | THR | 66 | 42.096 | 34.790 | 20.545 | 0.00 | 0.00 |
| ATOM | 1039 | H    | THR | 66 | 41.456 | 34.240 | 20.943 | 0.00 | 0.00 |
| ATOM | 1040 | CA   | THR | 66 | 42.367 | 34.593 | 19.211 | 0.00 | 0.00 |
| ATOM | 1041 | HA   | THR | 66 | 43.315 | 34.808 | 19.038 | 0.00 | 0.00 |
| ATOM | 1042 | CB   | THR | 66 | 42.186 | 33.214 | 18.884 | 0.00 | 0.00 |
| ATOM | 1043 | HB   | THR | 66 | 42.241 | 33.119 | 17.974 | 0.00 | 0.00 |
| ATOM | 1044 | CG2  | THR | 66 | 43.025 | 32.357 | 19.412 | 0.00 | 0.00 |
| ATOM | 1045 | 1HG2 | THR | 66 | 43.226 | 32.136 | 19.519 | 0.00 | 0.00 |
| ATOM | 1046 | 2HG2 | THR | 66 | 43.246 | 32.158 | 19.534 | 0.00 | 0.00 |
| ATOM | 1047 | 3HG2 | THR | 66 | 43.224 | 32.142 | 19.546 | 0.00 | 0.00 |
| ATOM | 1048 | OG1  | THR | 66 | 41.159 | 32.792 | 19.222 | 0.00 | 0.00 |
| ATOM | 1049 | HG1  | THR | 66 | 41.073 | 32.414 | 19.612 | 0.00 | 0.00 |
| ATOM | 1050 | C    | THR | 66 | 41.636 | 35.467 | 18.300 | 0.00 | 0.00 |
| ATOM | 1051 | O    | THR | 66 | 41.908 | 35.519 | 17.203 | 0.00 | 0.00 |
| ATOM | 1052 | N    | LEU | 67 | 40.726 | 36.177 | 18.732 | 0.00 | 0.00 |
| ATOM | 1053 | H    | LEU | 67 | 40.560 | 36.103 | 19.637 | 0.00 | 0.00 |
| ATOM | 1054 | CA   | LEU | 67 | 39.999 | 37.120 | 17.990 | 0.00 | 0.00 |
| ATOM | 1055 | HA   | LEU | 67 | 39.767 | 36.668 | 17.111 | 0.00 | 0.00 |
| ATOM | 1056 | CB   | LEU | 67 | 38.766 | 37.409 | 18.705 | 0.00 | 0.00 |
| ATOM | 1057 | HB2  | LEU | 67 | 38.432 | 36.725 | 19.104 | 0.00 | 0.00 |
| ATOM | 1058 | HB3  | LEU | 67 | 38.940 | 37.946 | 19.287 | 0.00 | 0.00 |
| ATOM | 1059 | CG   | LEU | 67 | 37.740 | 37.896 | 18.173 | 0.00 | 0.00 |
| ATOM | 1060 | HG   | LEU | 67 | 38.099 | 38.437 | 17.871 | 0.00 | 0.00 |
| ATOM | 1061 | CD1  | LEU | 67 | 36.948 | 37.345 | 17.511 | 0.00 | 0.00 |
| ATOM | 1062 | 1HD1 | LEU | 67 | 36.768 | 37.195 | 17.320 | 0.00 | 0.00 |
| ATOM | 1063 | 2HD1 | LEU | 67 | 36.742 | 37.189 | 17.381 | 0.00 | 0.00 |
| ATOM | 1064 | 3HD1 | LEU | 67 | 36.754 | 37.243 | 17.343 | 0.00 | 0.00 |
| ATOM | 1065 | CD2  | LEU | 67 | 36.953 | 38.220 | 18.736 | 0.00 | 0.00 |
| ATOM | 1066 | 1HD2 | LEU | 67 | 36.738 | 38.276 | 18.865 | 0.00 | 0.00 |
| ATOM | 1067 | 2HD2 | LEU | 67 | 36.780 | 38.298 | 18.877 | 0.00 | 0.00 |
| ATOM | 1068 | 3HD2 | LEU | 67 | 36.769 | 38.332 | 18.881 | 0.00 | 0.00 |
| ATOM | 1069 | C    | LEU | 67 | 40.778 | 38.370 | 17.731 | 0.00 | 0.00 |
| ATOM | 1070 | O    | LEU | 67 | 41.291 | 38.905 | 18.622 | 0.00 | 0.00 |
| ATOM | 1071 | N    | PRO | 68 | 40.876 | 38.870 | 16.562 | 0.00 | 0.00 |
| ATOM | 1072 | CD   | PRO | 68 | 40.460 | 38.274 | 15.398 | 0.00 | 0.00 |
| ATOM | 1073 | HD2  | PRO | 68 | 39.468 | 38.298 | 15.319 | 0.00 | 0.00 |
| ATOM | 1074 | HD3  | PRO | 68 | 40.780 | 37.300 | 15.326 | 0.00 | 0.00 |
| ATOM | 1075 | CG   | PRO | 68 | 41.025 | 39.060 | 14.361 | 0.00 | 0.00 |
| ATOM | 1076 | HG2  | PRO | 68 | 40.395 | 39.343 | 13.815 | 0.00 | 0.00 |
| ATOM | 1077 | HG3  | PRO | 68 | 41.628 | 38.577 | 13.914 | 0.00 | 0.00 |
| ATOM | 1078 | CB   | PRO | 68 | 41.638 | 40.159 | 14.865 | 0.00 | 0.00 |
| ATOM | 1079 | HB2  | PRO | 68 | 42.493 | 40.147 | 14.557 | 0.00 | 0.00 |
| ATOM | 1080 | HB3  | PRO | 68 | 41.225 | 40.927 | 14.561 | 0.00 | 0.00 |
| ATOM | 1081 | CA   | PRO | 68 | 41.572 | 40.073 | 16.290 | 0.00 | 0.00 |
| ATOM | 1082 | HA   | PRO | 68 | 42.518 | 39.974 | 16.646 | 0.00 | 0.00 |
| ATOM | 1083 | C    | PRO | 68 | 40.967 | 41.289 | 16.884 | 0.00 | 0.00 |
| ATOM | 1084 | O    | PRO | 68 | 39.846 | 41.487 | 16.785 | 0.00 | 0.00 |
| ATOM | 1085 | N    | LEU | 69 | 41.713 | 42.110 | 17.493 | 0.00 | 0.00 |
| ATOM | 1086 | H    | LEU | 69 | 42.612 | 41.885 | 17.523 | 0.00 | 0.00 |
| ATOM | 1087 | CA   | LEU | 69 | 41.332 | 43.300 | 18.149 | 0.00 | 0.00 |
| ATOM | 1088 | HA   | LEU | 69 | 40.501 | 43.673 | 17.692 | 0.00 | 0.00 |
| ATOM | 1089 | CB   | LEU | 69 | 41.005 | 42.985 | 19.509 | 0.00 | 0.00 |
| ATOM | 1090 | HB2  | LEU | 69 | 40.981 | 42.466 | 19.625 | 0.00 | 0.00 |
| ATOM | 1091 | HB3  | LEU | 69 | 41.358 | 43.137 | 19.887 | 0.00 | 0.00 |
| ATOM | 1092 | CG   | LEU | 69 | 40.261 | 43.148 | 20.243 | 0.00 | 0.00 |
| ATOM | 1093 | HG   | LEU | 69 | 40.555 | 43.289 | 20.033 | 0.00 | 0.00 |
| ATOM | 1094 | CD1  | LEU | 69 | 39.567 | 43.169 | 20.704 | 0.00 | 0.00 |

|      |      |      |     |    |        |        |        |      |      |
|------|------|------|-----|----|--------|--------|--------|------|------|
| ATOM | 1095 | 1HD1 | LEU | 69 | 39.423 | 43.205 | 20.777 | 0.00 | 0.00 |
| ATOM | 1096 | 2HD1 | LEU | 69 | 39.425 | 43.189 | 20.846 | 0.00 | 0.00 |
| ATOM | 1097 | 3HD1 | LEU | 69 | 39.347 | 43.129 | 20.826 | 0.00 | 0.00 |
| ATOM | 1098 | CD2  | LEU | 69 | 39.790 | 43.092 | 20.878 | 0.00 | 0.00 |
| ATOM | 1099 | 1HD2 | LEU | 69 | 39.678 | 43.101 | 21.073 | 0.00 | 0.00 |
| ATOM | 1100 | 2HD2 | LEU | 69 | 39.689 | 43.086 | 20.971 | 0.00 | 0.00 |
| ATOM | 1101 | 3HD2 | LEU | 69 | 39.663 | 43.047 | 21.053 | 0.00 | 0.00 |
| ATOM | 1102 | C    | LEU | 69 | 42.389 | 44.341 | 18.101 | 0.00 | 0.00 |
| ATOM | 1103 | O    | LEU | 69 | 43.493 | 44.041 | 18.172 | 0.00 | 0.00 |
| ATOM | 1104 | N    | GLN | 70 | 42.056 | 45.565 | 18.038 | 0.00 | 0.00 |
| ATOM | 1105 | H    | GLN | 70 | 41.141 | 45.731 | 17.937 | 0.00 | 0.00 |
| ATOM | 1106 | CA   | GLN | 70 | 42.916 | 46.691 | 18.139 | 0.00 | 0.00 |
| ATOM | 1107 | HA   | GLN | 70 | 43.857 | 46.360 | 18.338 | 0.00 | 0.00 |
| ATOM | 1108 | CB   | GLN | 70 | 42.968 | 47.394 | 16.875 | 0.00 | 0.00 |
| ATOM | 1109 | HB2  | GLN | 70 | 42.342 | 47.459 | 16.602 | 0.00 | 0.00 |
| ATOM | 1110 | HB3  | GLN | 70 | 43.214 | 48.093 | 16.873 | 0.00 | 0.00 |
| ATOM | 1111 | CG   | GLN | 70 | 43.550 | 47.094 | 15.962 | 0.00 | 0.00 |
| ATOM | 1112 | HG2  | GLN | 70 | 43.972 | 46.788 | 15.992 | 0.00 | 0.00 |
| ATOM | 1113 | HG3  | GLN | 70 | 43.255 | 46.823 | 15.726 | 0.00 | 0.00 |
| ATOM | 1114 | CD   | GLN | 70 | 43.966 | 47.576 | 15.295 | 0.00 | 0.00 |
| ATOM | 1115 | OE1  | GLN | 70 | 44.310 | 48.057 | 15.358 | 0.00 | 0.00 |
| ATOM | 1116 | NE2  | GLN | 70 | 43.955 | 47.473 | 14.633 | 0.00 | 0.00 |
| ATOM | 1117 | 1HE2 | GLN | 70 | 43.675 | 47.083 | 14.567 | 0.00 | 0.00 |
| ATOM | 1118 | 2HE2 | GLN | 70 | 44.231 | 47.788 | 14.197 | 0.00 | 0.00 |
| ATOM | 1119 | C    | GLN | 70 | 42.518 | 47.597 | 19.234 | 0.00 | 0.00 |
| ATOM | 1120 | O    | GLN | 70 | 41.762 | 48.442 | 19.068 | 0.00 | 0.00 |
| ATOM | 1121 | N    | PRO | 71 | 42.985 | 47.448 | 20.358 | 0.00 | 0.00 |
| ATOM | 1122 | CD   | PRO | 71 | 43.894 | 46.504 | 20.700 | 0.00 | 0.00 |
| ATOM | 1123 | HD2  | PRO | 71 | 44.746 | 46.704 | 20.340 | 0.00 | 0.00 |
| ATOM | 1124 | HD3  | PRO | 71 | 43.659 | 45.569 | 20.423 | 0.00 | 0.00 |
| ATOM | 1125 | CG   | PRO | 71 | 43.954 | 46.586 | 22.037 | 0.00 | 0.00 |
| ATOM | 1126 | HG2  | PRO | 71 | 44.700 | 46.775 | 22.290 | 0.00 | 0.00 |
| ATOM | 1127 | HG3  | PRO | 71 | 43.736 | 45.852 | 22.330 | 0.00 | 0.00 |
| ATOM | 1128 | CB   | PRO | 71 | 43.182 | 47.530 | 22.518 | 0.00 | 0.00 |
| ATOM | 1129 | HB2  | PRO | 71 | 42.632 | 47.146 | 23.047 | 0.00 | 0.00 |
| ATOM | 1130 | HB3  | PRO | 71 | 43.667 | 48.113 | 22.990 | 0.00 | 0.00 |
| ATOM | 1131 | CA   | PRO | 71 | 42.522 | 48.138 | 21.462 | 0.00 | 0.00 |
| ATOM | 1132 | HA   | PRO | 71 | 41.558 | 47.958 | 21.545 | 0.00 | 0.00 |
| ATOM | 1133 | C    | PRO | 71 | 42.683 | 49.596 | 21.502 | 0.00 | 0.00 |
| ATOM | 1134 | O    | PRO | 71 | 42.017 | 50.265 | 22.147 | 0.00 | 0.00 |
| ATOM | 1135 | N    | SER | 72 | 43.532 | 50.101 | 20.809 | 0.00 | 0.00 |
| ATOM | 1136 | H    | SER | 72 | 44.063 | 49.505 | 20.314 | 0.00 | 0.00 |
| ATOM | 1137 | CA   | SER | 72 | 43.760 | 51.480 | 20.722 | 0.00 | 0.00 |
| ATOM | 1138 | HA   | SER | 72 | 43.416 | 51.933 | 21.554 | 0.00 | 0.00 |
| ATOM | 1139 | CB   | SER | 72 | 45.143 | 51.697 | 20.672 | 0.00 | 0.00 |
| ATOM | 1140 | HB2  | SER | 72 | 45.463 | 51.783 | 20.126 | 0.00 | 0.00 |
| ATOM | 1141 | HB3  | SER | 72 | 45.424 | 52.213 | 20.939 | 0.00 | 0.00 |
| ATOM | 1142 | OG   | SER | 72 | 45.667 | 51.145 | 20.991 | 0.00 | 0.00 |
| ATOM | 1143 | HG   | SER | 72 | 46.093 | 51.116 | 21.045 | 0.00 | 0.00 |
| ATOM | 1144 | C    | SER | 72 | 43.092 | 52.172 | 19.631 | 0.00 | 0.00 |
| ATOM | 1145 | O    | SER | 72 | 43.246 | 53.254 | 19.447 | 0.00 | 0.00 |
| ATOM | 1146 | N    | SER | 73 | 42.344 | 51.574 | 18.908 | 0.00 | 0.00 |
| ATOM | 1147 | H    | SER | 73 | 42.244 | 50.696 | 19.119 | 0.00 | 0.00 |
| ATOM | 1148 | CA   | SER | 73 | 41.604 | 52.137 | 17.854 | 0.00 | 0.00 |
| ATOM | 1149 | HA   | SER | 73 | 42.177 | 52.846 | 17.395 | 0.00 | 0.00 |
| ATOM | 1150 | CB   | SER | 73 | 41.323 | 51.100 | 16.890 | 0.00 | 0.00 |
| ATOM | 1151 | HB2  | SER | 73 | 41.328 | 51.221 | 16.218 | 0.00 | 0.00 |
| ATOM | 1152 | HB3  | SER | 73 | 41.739 | 50.612 | 16.879 | 0.00 | 0.00 |
| ATOM | 1153 | OG   | SER | 73 | 40.525 | 50.619 | 16.841 | 0.00 | 0.00 |
| ATOM | 1154 | HG   | SER | 73 | 40.746 | 50.070 | 16.845 | 0.00 | 0.00 |
| ATOM | 1155 | C    | SER | 73 | 40.366 | 52.830 | 18.277 | 0.00 | 0.00 |
| ATOM | 1156 | O    | SER | 73 | 39.801 | 52.494 | 19.264 | 0.00 | 0.00 |
| ATOM | 1157 | N    | THR | 74 | 39.896 | 53.772 | 17.510 | 0.00 | 0.00 |
| ATOM | 1158 | H    | THR | 74 | 40.390 | 54.008 | 16.716 | 0.00 | 0.00 |
| ATOM | 1159 | CA   | THR | 74 | 38.658 | 54.467 | 17.752 | 0.00 | 0.00 |
| ATOM | 1160 | HA   | THR | 74 | 38.696 | 54.883 | 18.721 | 0.00 | 0.00 |
| ATOM | 1161 | CB   | THR | 74 | 38.473 | 55.594 | 16.783 | 0.00 | 0.00 |
| ATOM | 1162 | HB   | THR | 74 | 37.842 | 55.647 | 16.485 | 0.00 | 0.00 |
| ATOM | 1163 | CG2  | THR | 74 | 38.589 | 56.616 | 17.018 | 0.00 | 0.00 |
| ATOM | 1164 | 1HG2 | THR | 74 | 38.599 | 56.871 | 17.065 | 0.00 | 0.00 |
| ATOM | 1165 | 2HG2 | THR | 74 | 38.622 | 56.882 | 17.069 | 0.00 | 0.00 |
| ATOM | 1166 | 3HG2 | THR | 74 | 38.617 | 56.851 | 17.090 | 0.00 | 0.00 |
| ATOM | 1167 | OG1  | THR | 74 | 39.005 | 55.674 | 16.005 | 0.00 | 0.00 |
| ATOM | 1168 | HG1  | THR | 74 | 39.066 | 56.065 | 15.586 | 0.00 | 0.00 |
| ATOM | 1169 | C    | THR | 74 | 37.458 | 53.554 | 17.717 | 0.00 | 0.00 |
| ATOM | 1170 | O    | THR | 74 | 36.569 | 53.703 | 18.513 | 0.00 | 0.00 |
| ATOM | 1171 | N    | MET | 75 | 37.448 | 52.556 | 16.864 | 0.00 | 0.00 |
| ATOM | 1172 | H    | MET | 75 | 38.200 | 52.487 | 16.238 | 0.00 | 0.00 |
| ATOM | 1173 | CA   | MET | 75 | 36.386 | 51.568 | 16.789 | 0.00 | 0.00 |
| ATOM | 1174 | HA   | MET | 75 | 35.448 | 52.077 | 16.822 | 0.00 | 0.00 |
| ATOM | 1175 | CB   | MET | 75 | 36.462 | 50.831 | 15.475 | 0.00 | 0.00 |
| ATOM | 1176 | HB2  | MET | 75 | 37.388 | 50.338 | 15.398 | 0.00 | 0.00 |
| ATOM | 1177 | HB3  | MET | 75 | 35.701 | 50.095 | 15.455 | 0.00 | 0.00 |
| ATOM | 1178 | CG   | MET | 75 | 36.300 | 51.719 | 14.283 | 0.00 | 0.00 |
| ATOM | 1179 | HG2  | MET | 75 | 37.015 | 52.172 | 14.138 | 0.00 | 0.00 |
| ATOM | 1180 | HG3  | MET | 75 | 36.185 | 51.275 | 13.540 | 0.00 | 0.00 |
| ATOM | 1181 | SD   | MET | 75 | 35.204 | 52.745 | 14.193 | 0.00 | 0.00 |
| ATOM | 1182 | CE   | MET | 75 | 35.673 | 53.753 | 13.263 | 0.00 | 0.00 |
| ATOM | 1183 | HE1  | MET | 75 | 35.776 | 53.953 | 13.079 | 0.00 | 0.00 |
| ATOM | 1184 | HE2  | MET | 75 | 35.761 | 53.960 | 13.064 | 0.00 | 0.00 |
| ATOM | 1185 | HE3  | MET | 75 | 35.764 | 53.961 | 13.084 | 0.00 | 0.00 |
| ATOM | 1186 | C    | MET | 75 | 36.385 | 50.607 | 17.967 | 0.00 | 0.00 |
| ATOM | 1187 | O    | MET | 75 | 35.337 | 50.190 | 18.417 | 0.00 | 0.00 |
| ATOM | 1188 | N    | GLY | 76 | 37.539 | 50.331 | 18.537 | 0.00 | 0.00 |
| ATOM | 1189 | H    | GLY | 76 | 38.361 | 50.681 | 18.113 | 0.00 | 0.00 |
| ATOM | 1190 | CA   | GLY | 76 | 37.664 | 49.637 | 19.799 | 0.00 | 0.00 |
| ATOM | 1191 | HA2  | GLY | 76 | 37.205 | 48.680 | 19.733 | 0.00 | 0.00 |
| ATOM | 1192 | HA3  | GLY | 76 | 38.698 | 49.507 | 20.006 | 0.00 | 0.00 |
| ATOM | 1193 | C    | GLY | 76 | 37.036 | 50.381 | 20.953 | 0.00 | 0.00 |
| ATOM | 1194 | O    | GLY | 76 | 36.322 | 49.795 | 21.737 | 0.00 | 0.00 |
| ATOM | 1195 | N    | GLN | 77 | 37.213 | 51.687 | 21.010 | 0.00 | 0.00 |
| ATOM | 1196 | H    | GLN | 77 | 37.817 | 52.098 | 20.345 | 0.00 | 0.00 |
| ATOM | 1197 | CA   | GLN | 77 | 36.595 | 52.546 | 22.001 | 0.00 | 0.00 |
| ATOM | 1198 | HA   | GLN | 77 | 36.764 | 52.112 | 22.963 | 0.00 | 0.00 |
| ATOM | 1199 | CB   | GLN | 77 | 37.257 | 53.909 | 21.977 | 0.00 | 0.00 |

|      |      |      |     |    |        |        |        |      |      |
|------|------|------|-----|----|--------|--------|--------|------|------|
| ATOM | 1200 | HB2  | GLN | 77 | 37.704 | 54.092 | 21.522 | 0.00 | 0.00 |
| ATOM | 1201 | HB3  | GLN | 77 | 36.912 | 54.453 | 21.898 | 0.00 | 0.00 |
| ATOM | 1202 | CG   | GLN | 77 | 37.791 | 54.325 | 22.671 | 0.00 | 0.00 |
| ATOM | 1203 | HG2  | GLN | 77 | 37.883 | 54.386 | 22.808 | 0.00 | 0.00 |
| ATOM | 1204 | HG3  | GLN | 77 | 37.796 | 54.267 | 22.616 | 0.00 | 0.00 |
| ATOM | 1205 | CD   | GLN | 77 | 38.211 | 54.775 | 23.252 | 0.00 | 0.00 |
| ATOM | 1206 | OE1  | GLN | 77 | 38.219 | 54.946 | 23.447 | 0.00 | 0.00 |
| ATOM | 1207 | NE2  | GLN | 77 | 38.573 | 54.987 | 23.554 | 0.00 | 0.00 |
| ATOM | 1208 | 1HE2 | GLN | 77 | 38.849 | 55.285 | 23.933 | 0.00 | 0.00 |
| ATOM | 1209 | 2HE2 | GLN | 77 | 38.578 | 54.856 | 23.407 | 0.00 | 0.00 |
| ATOM | 1210 | C    | GLN | 77 | 35.089 | 52.646 | 21.839 | 0.00 | 0.00 |
| ATOM | 1211 | O    | GLN | 77 | 34.387 | 52.621 | 22.823 | 0.00 | 0.00 |
| ATOM | 1212 | N    | VAL | 78 | 34.569 | 52.675 | 20.626 | 0.00 | 0.00 |
| ATOM | 1213 | H    | VAL | 78 | 35.187 | 52.737 | 19.860 | 0.00 | 0.00 |
| ATOM | 1214 | CA   | VAL | 78 | 33.132 | 52.591 | 20.370 | 0.00 | 0.00 |
| ATOM | 1215 | HA   | VAL | 78 | 32.641 | 53.336 | 20.960 | 0.00 | 0.00 |
| ATOM | 1216 | CB   | VAL | 78 | 32.805 | 52.874 | 18.914 | 0.00 | 0.00 |
| ATOM | 1217 | HB   | VAL | 78 | 33.315 | 52.287 | 18.369 | 0.00 | 0.00 |
| ATOM | 1218 | CG1  | VAL | 78 | 31.487 | 52.706 | 18.547 | 0.00 | 0.00 |
| ATOM | 1219 | 1HG1 | VAL | 78 | 31.152 | 52.693 | 18.488 | 0.00 | 0.00 |
| ATOM | 1220 | 2HG1 | VAL | 78 | 31.185 | 52.673 | 18.419 | 0.00 | 0.00 |
| ATOM | 1221 | 3HG1 | VAL | 78 | 31.157 | 52.625 | 18.443 | 0.00 | 0.00 |
| ATOM | 1222 | CG2  | VAL | 78 | 33.089 | 54.162 | 18.483 | 0.00 | 0.00 |
| ATOM | 1223 | 1HG2 | VAL | 78 | 33.145 | 54.488 | 18.384 | 0.00 | 0.00 |
| ATOM | 1224 | 2HG2 | VAL | 78 | 33.184 | 54.468 | 18.372 | 0.00 | 0.00 |
| ATOM | 1225 | 3HG2 | VAL | 78 | 33.153 | 54.471 | 18.364 | 0.00 | 0.00 |
| ATOM | 1226 | C    | VAL | 78 | 32.570 | 51.252 | 20.821 | 0.00 | 0.00 |
| ATOM | 1227 | O    | VAL | 78 | 31.555 | 51.219 | 21.484 | 0.00 | 0.00 |
| ATOM | 1228 | N    | GLY | 79 | 33.255 | 50.152 | 20.556 | 0.00 | 0.00 |
| ATOM | 1229 | H    | GLY | 79 | 34.068 | 50.235 | 19.994 | 0.00 | 0.00 |
| ATOM | 1230 | CA   | GLY | 79 | 32.885 | 48.833 | 21.046 | 0.00 | 0.00 |
| ATOM | 1231 | HA2  | GLY | 79 | 31.927 | 48.566 | 20.666 | 0.00 | 0.00 |
| ATOM | 1232 | HA3  | GLY | 79 | 33.597 | 48.130 | 20.684 | 0.00 | 0.00 |
| ATOM | 1233 | C    | GLY | 79 | 32.844 | 48.726 | 22.558 | 0.00 | 0.00 |
| ATOM | 1234 | O    | GLY | 79 | 31.928 | 48.145 | 23.098 | 0.00 | 0.00 |
| ATOM | 1235 | N    | ARG | 80 | 33.779 | 49.352 | 23.255 | 0.00 | 0.00 |
| ATOM | 1236 | H    | ARG | 80 | 34.513 | 49.777 | 22.746 | 0.00 | 0.00 |
| ATOM | 1237 | CA   | ARG | 80 | 33.800 | 49.443 | 24.711 | 0.00 | 0.00 |
| ATOM | 1238 | HA   | ARG | 80 | 33.654 | 48.457 | 25.115 | 0.00 | 0.00 |
| ATOM | 1239 | CB   | ARG | 80 | 35.157 | 49.949 | 25.159 | 0.00 | 0.00 |
| ATOM | 1240 | HB2  | ARG | 80 | 35.786 | 49.647 | 24.689 | 0.00 | 0.00 |
| ATOM | 1241 | HB3  | ARG | 80 | 35.246 | 50.785 | 25.097 | 0.00 | 0.00 |
| ATOM | 1242 | CG   | ARG | 80 | 35.574 | 49.720 | 26.318 | 0.00 | 0.00 |
| ATOM | 1243 | HG2  | ARG | 80 | 35.089 | 50.007 | 26.779 | 0.00 | 0.00 |
| ATOM | 1244 | HG3  | ARG | 80 | 35.464 | 49.009 | 26.386 | 0.00 | 0.00 |
| ATOM | 1245 | CD   | ARG | 80 | 36.809 | 50.062 | 26.769 | 0.00 | 0.00 |
| ATOM | 1246 | HD2  | ARG | 80 | 37.051 | 50.019 | 26.794 | 0.00 | 0.00 |
| ATOM | 1247 | HD3  | ARG | 80 | 37.066 | 50.224 | 26.751 | 0.00 | 0.00 |
| ATOM | 1248 | NE   | ARG | 80 | 37.339 | 50.226 | 27.204 | 0.00 | 0.00 |
| ATOM | 1249 | HE   | ARG | 80 | 37.177 | 50.149 | 27.395 | 0.00 | 0.00 |
| ATOM | 1250 | CZ   | ARG | 80 | 38.031 | 50.464 | 27.385 | 0.00 | 0.00 |
| ATOM | 1251 | NH1  | ARG | 80 | 38.433 | 50.571 | 27.767 | 0.00 | 0.00 |
| ATOM | 1252 | 1HH1 | ARG | 80 | 38.223 | 50.472 | 27.927 | 0.00 | 0.00 |
| ATOM | 1253 | 2HH1 | ARG | 80 | 38.955 | 50.751 | 27.904 | 0.00 | 0.00 |
| ATOM | 1254 | NH2  | ARG | 80 | 38.341 | 50.603 | 27.198 | 0.00 | 0.00 |
| ATOM | 1255 | 1HH2 | ARG | 80 | 38.070 | 50.546 | 26.922 | 0.00 | 0.00 |
| ATOM | 1256 | 2HH2 | ARG | 80 | 38.873 | 50.784 | 27.358 | 0.00 | 0.00 |
| ATOM | 1257 | C    | ARG | 80 | 32.671 | 50.289 | 25.260 | 0.00 | 0.00 |
| ATOM | 1258 | O    | ARG | 80 | 32.041 | 49.888 | 26.209 | 0.00 | 0.00 |
| ATOM | 1259 | N    | GLN | 81 | 32.362 | 51.409 | 24.639 | 0.00 | 0.00 |
| ATOM | 1260 | H    | GLN | 81 | 32.927 | 51.682 | 23.875 | 0.00 | 0.00 |
| ATOM | 1261 | CA   | GLN | 81 | 31.260 | 52.272 | 25.027 | 0.00 | 0.00 |
| ATOM | 1262 | HA   | GLN | 81 | 31.323 | 52.445 | 26.082 | 0.00 | 0.00 |
| ATOM | 1263 | CB   | GLN | 81 | 31.387 | 53.611 | 24.326 | 0.00 | 0.00 |
| ATOM | 1264 | HB2  | GLN | 81 | 31.800 | 53.638 | 23.661 | 0.00 | 0.00 |
| ATOM | 1265 | HB3  | GLN | 81 | 30.728 | 53.929 | 24.083 | 0.00 | 0.00 |
| ATOM | 1266 | CG   | GLN | 81 | 31.836 | 54.510 | 24.849 | 0.00 | 0.00 |
| ATOM | 1267 | HG2  | GLN | 81 | 31.748 | 54.580 | 25.191 | 0.00 | 0.00 |
| ATOM | 1268 | HG3  | GLN | 81 | 32.163 | 54.378 | 24.891 | 0.00 | 0.00 |
| ATOM | 1269 | CD   | GLN | 81 | 31.969 | 55.514 | 24.857 | 0.00 | 0.00 |
| ATOM | 1270 | OE1  | GLN | 81 | 32.030 | 55.792 | 24.672 | 0.00 | 0.00 |
| ATOM | 1271 | NE2  | GLN | 81 | 32.018 | 56.100 | 25.073 | 0.00 | 0.00 |
| ATOM | 1272 | 1HE2 | GLN | 81 | 32.103 | 56.752 | 25.075 | 0.00 | 0.00 |
| ATOM | 1273 | 2HE2 | GLN | 81 | 31.973 | 55.897 | 25.236 | 0.00 | 0.00 |
| ATOM | 1274 | C    | GLN | 81 | 29.904 | 51.634 | 24.778 | 0.00 | 0.00 |
| ATOM | 1275 | O    | GLN | 81 | 29.015 | 51.814 | 25.553 | 0.00 | 0.00 |
| ATOM | 1276 | N    | LEU | 82 | 29.751 | 50.830 | 23.754 | 0.00 | 0.00 |
| ATOM | 1277 | H    | LEU | 82 | 30.491 | 50.771 | 23.114 | 0.00 | 0.00 |
| ATOM | 1278 | CA   | LEU | 82 | 28.562 | 50.035 | 23.510 | 0.00 | 0.00 |
| ATOM | 1279 | HA   | LEU | 82 | 27.706 | 50.662 | 23.650 | 0.00 | 0.00 |
| ATOM | 1280 | CB   | LEU | 82 | 28.583 | 49.553 | 22.071 | 0.00 | 0.00 |
| ATOM | 1281 | HB2  | LEU | 82 | 29.228 | 49.661 | 21.702 | 0.00 | 0.00 |
| ATOM | 1282 | HB3  | LEU | 82 | 28.498 | 48.814 | 21.981 | 0.00 | 0.00 |
| ATOM | 1283 | CG   | LEU | 82 | 27.880 | 49.884 | 21.217 | 0.00 | 0.00 |
| ATOM | 1284 | HG   | LEU | 82 | 28.120 | 49.987 | 21.506 | 0.00 | 0.00 |
| ATOM | 1285 | CD1  | LEU | 82 | 27.526 | 49.964 | 20.480 | 0.00 | 0.00 |
| ATOM | 1286 | 1HD1 | LEU | 82 | 27.477 | 49.963 | 20.344 | 0.00 | 0.00 |
| ATOM | 1287 | 2HD1 | LEU | 82 | 27.411 | 49.985 | 20.282 | 0.00 | 0.00 |
| ATOM | 1288 | 3HD1 | LEU | 82 | 27.437 | 50.001 | 20.279 | 0.00 | 0.00 |
| ATOM | 1289 | CD2  | LEU | 82 | 27.199 | 49.978 | 20.634 | 0.00 | 0.00 |
| ATOM | 1290 | 1HD2 | LEU | 82 | 27.031 | 50.009 | 20.489 | 0.00 | 0.00 |
| ATOM | 1291 | 2HD2 | LEU | 82 | 27.034 | 49.999 | 20.503 | 0.00 | 0.00 |
| ATOM | 1292 | 3HD2 | LEU | 82 | 27.038 | 49.997 | 20.484 | 0.00 | 0.00 |
| ATOM | 1293 | C    | LEU | 82 | 28.413 | 48.884 | 24.500 | 0.00 | 0.00 |
| ATOM | 1294 | O    | LEU | 82 | 27.317 | 48.551 | 24.875 | 0.00 | 0.00 |
| ATOM | 1295 | N    | ALA | 83 | 29.492 | 48.310 | 24.975 | 0.00 | 0.00 |
| ATOM | 1296 | H    | ALA | 83 | 30.361 | 48.588 | 24.605 | 0.00 | 0.00 |
| ATOM | 1297 | CA   | ALA | 83 | 29.471 | 47.269 | 25.981 | 0.00 | 0.00 |
| ATOM | 1298 | HA   | ALA | 83 | 28.746 | 46.536 | 25.700 | 0.00 | 0.00 |
| ATOM | 1299 | CB   | ALA | 83 | 30.814 | 46.589 | 26.000 | 0.00 | 0.00 |
| ATOM | 1300 | HB1  | ALA | 83 | 31.135 | 46.408 | 26.085 | 0.00 | 0.00 |
| ATOM | 1301 | HB2  | ALA | 83 | 31.104 | 46.368 | 25.960 | 0.00 | 0.00 |
| ATOM | 1302 | HB3  | ALA | 83 | 31.169 | 46.483 | 25.980 | 0.00 | 0.00 |
| ATOM | 1303 | C    | ALA | 83 | 29.063 | 47.763 | 27.356 | 0.00 | 0.00 |
| ATOM | 1304 | O    | ALA | 83 | 28.357 | 47.075 | 28.055 | 0.00 | 0.00 |



|      |      |      |     |    |        |        |        |      |      |
|------|------|------|-----|----|--------|--------|--------|------|------|
| ATOM | 1305 | N    | ILE | 84 | 29.440 | 48.961 | 27.732 | 0.00 | 0.00 |
| ATOM | 1306 | H    | ILE | 84 | 30.034 | 49.466 | 27.127 | 0.00 | 0.00 |
| ATOM | 1307 | CA   | ILE | 84 | 29.106 | 49.528 | 29.013 | 0.00 | 0.00 |
| ATOM | 1308 | HA   | ILE | 84 | 29.278 | 48.789 | 29.733 | 0.00 | 0.00 |
| ATOM | 1309 | CB   | ILE | 84 | 30.004 | 50.690 | 29.331 | 0.00 | 0.00 |
| ATOM | 1310 | HB   | ILE | 84 | 30.336 | 50.838 | 29.028 | 0.00 | 0.00 |
| ATOM | 1311 | CG2  | ILE | 84 | 29.901 | 51.440 | 29.484 | 0.00 | 0.00 |
| ATOM | 1312 | 1HG2 | ILE | 84 | 29.888 | 51.632 | 29.526 | 0.00 | 0.00 |
| ATOM | 1313 | 2HG2 | ILE | 84 | 29.878 | 51.640 | 29.525 | 0.00 | 0.00 |
| ATOM | 1314 | 3HG2 | ILE | 84 | 29.871 | 51.613 | 29.514 | 0.00 | 0.00 |
| ATOM | 1315 | CG1  | ILE | 84 | 30.614 | 50.914 | 29.909 | 0.00 | 0.00 |
| ATOM | 1316 | 2HG1 | ILE | 84 | 30.822 | 51.011 | 30.028 | 0.00 | 0.00 |
| ATOM | 1317 | 3HG1 | ILE | 84 | 30.339 | 50.822 | 29.872 | 0.00 | 0.00 |
| ATOM | 1318 | CD1  | ILE | 84 | 31.352 | 51.141 | 30.380 | 0.00 | 0.00 |
| ATOM | 1319 | 1HD1 | ILE | 84 | 31.516 | 51.193 | 30.519 | 0.00 | 0.00 |
| ATOM | 1320 | 2HD1 | ILE | 84 | 31.546 | 51.178 | 30.469 | 0.00 | 0.00 |
| ATOM | 1321 | 3HD1 | ILE | 84 | 31.537 | 51.220 | 30.499 | 0.00 | 0.00 |
| ATOM | 1322 | C    | ILE | 84 | 27.666 | 49.853 | 29.149 | 0.00 | 0.00 |
| ATOM | 1323 | O    | ILE | 84 | 27.140 | 49.759 | 30.204 | 0.00 | 0.00 |
| ATOM | 1324 | N    | ILE | 85 | 26.992 | 50.144 | 28.090 | 0.00 | 0.00 |
| ATOM | 1325 | H    | ILE | 85 | 27.477 | 50.236 | 27.259 | 0.00 | 0.00 |
| ATOM | 1326 | CA   | ILE | 85 | 25.572 | 50.271 | 28.071 | 0.00 | 0.00 |
| ATOM | 1327 | HA   | ILE | 85 | 25.278 | 50.881 | 28.867 | 0.00 | 0.00 |
| ATOM | 1328 | CB   | ILE | 85 | 25.131 | 50.942 | 26.828 | 0.00 | 0.00 |
| ATOM | 1329 | HB   | ILE | 85 | 25.242 | 50.706 | 26.434 | 0.00 | 0.00 |
| ATOM | 1330 | CG2  | ILE | 85 | 24.391 | 51.166 | 26.524 | 0.00 | 0.00 |
| ATOM | 1331 | 1HG2 | ILE | 85 | 24.218 | 51.209 | 26.434 | 0.00 | 0.00 |
| ATOM | 1332 | 2HG2 | ILE | 85 | 24.193 | 51.241 | 26.432 | 0.00 | 0.00 |
| ATOM | 1333 | 3HG2 | ILE | 85 | 24.212 | 51.210 | 26.476 | 0.00 | 0.00 |
| ATOM | 1334 | CG1  | ILE | 85 | 25.273 | 51.735 | 26.417 | 0.00 | 0.00 |
| ATOM | 1335 | 2HG1 | ILE | 85 | 25.217 | 51.994 | 26.644 | 0.00 | 0.00 |
| ATOM | 1336 | 3HG1 | ILE | 85 | 25.688 | 51.604 | 26.594 | 0.00 | 0.00 |
| ATOM | 1337 | CD1  | ILE | 85 | 24.961 | 52.381 | 25.460 | 0.00 | 0.00 |
| ATOM | 1338 | 1HD1 | ILE | 85 | 24.895 | 52.527 | 25.221 | 0.00 | 0.00 |
| ATOM | 1339 | 2HD1 | ILE | 85 | 24.878 | 52.530 | 25.233 | 0.00 | 0.00 |
| ATOM | 1340 | 3HD1 | ILE | 85 | 24.893 | 52.565 | 25.231 | 0.00 | 0.00 |
| ATOM | 1341 | C    | ILE | 85 | 24.905 | 48.958 | 28.305 | 0.00 | 0.00 |
| ATOM | 1342 | O    | ILE | 85 | 23.872 | 48.918 | 28.898 | 0.00 | 0.00 |
| ATOM | 1343 | N    | GLY | 86 | 25.526 | 47.876 | 27.927 | 0.00 | 0.00 |
| ATOM | 1344 | H    | GLY | 86 | 26.365 | 47.978 | 27.441 | 0.00 | 0.00 |
| ATOM | 1345 | CA   | GLY | 86 | 25.095 | 46.551 | 28.196 | 0.00 | 0.00 |
| ATOM | 1346 | HA2  | GLY | 86 | 24.172 | 46.411 | 27.795 | 0.00 | 0.00 |
| ATOM | 1347 | HA3  | GLY | 86 | 25.751 | 45.902 | 27.733 | 0.00 | 0.00 |
| ATOM | 1348 | C    | GLY | 86 | 25.016 | 46.168 | 29.614 | 0.00 | 0.00 |
| ATOM | 1349 | O    | GLY | 86 | 24.338 | 45.296 | 29.930 | 0.00 | 0.00 |
| ATOM | 1350 | N    | ASP | 87 | 25.671 | 46.834 | 30.475 | 0.00 | 0.00 |
| ATOM | 1351 | H    | ASP | 87 | 26.228 | 47.512 | 30.144 | 0.00 | 0.00 |
| ATOM | 1352 | CA   | ASP | 87 | 25.588 | 46.683 | 31.874 | 0.00 | 0.00 |
| ATOM | 1353 | HA   | ASP | 87 | 25.420 | 45.685 | 32.106 | 0.00 | 0.00 |
| ATOM | 1354 | CB   | ASP | 87 | 26.867 | 47.035 | 32.464 | 0.00 | 0.00 |
| ATOM | 1355 | HB2  | ASP | 87 | 27.601 | 46.510 | 32.014 | 0.00 | 0.00 |
| ATOM | 1356 | HB3  | ASP | 87 | 27.039 | 48.019 | 32.298 | 0.00 | 0.00 |
| ATOM | 1357 | CG   | ASP | 87 | 26.951 | 46.760 | 33.874 | 0.00 | 0.00 |
| ATOM | 1358 | OD1  | ASP | 87 | 26.982 | 46.547 | 34.408 | 0.00 | 0.00 |
| ATOM | 1359 | OD2  | ASP | 87 | 27.014 | 46.753 | 34.451 | 0.00 | 0.00 |
| ATOM | 1360 | C    | ASP | 87 | 24.487 | 47.467 | 32.453 | 0.00 | 0.00 |
| ATOM | 1361 | O    | ASP | 87 | 23.959 | 47.098 | 33.406 | 0.00 | 0.00 |
| ATOM | 1362 | N    | ASP | 88 | 24.101 | 48.524 | 31.867 | 0.00 | 0.00 |
| ATOM | 1363 | H    | ASP | 88 | 24.560 | 48.769 | 31.081 | 0.00 | 0.00 |
| ATOM | 1364 | CA   | ASP | 88 | 23.062 | 49.353 | 32.305 | 0.00 | 0.00 |
| ATOM | 1365 | HA   | ASP | 88 | 23.114 | 49.390 | 33.339 | 0.00 | 0.00 |
| ATOM | 1366 | CB   | ASP | 88 | 23.264 | 50.712 | 31.770 | 0.00 | 0.00 |
| ATOM | 1367 | HB2  | ASP | 88 | 24.225 | 50.960 | 31.892 | 0.00 | 0.00 |
| ATOM | 1368 | HB3  | ASP | 88 | 23.060 | 50.738 | 30.784 | 0.00 | 0.00 |
| ATOM | 1369 | CG   | ASP | 88 | 22.476 | 51.716 | 32.402 | 0.00 | 0.00 |
| ATOM | 1370 | OD1  | ASP | 88 | 22.195 | 52.146 | 32.604 | 0.00 | 0.00 |
| ATOM | 1371 | OD2  | ASP | 88 | 22.160 | 52.113 | 32.700 | 0.00 | 0.00 |
| ATOM | 1372 | C    | ASP | 88 | 21.733 | 48.845 | 31.953 | 0.00 | 0.00 |
| ATOM | 1373 | O    | ASP | 88 | 20.849 | 48.994 | 32.676 | 0.00 | 0.00 |
| ATOM | 1374 | N    | ILE | 89 | 21.599 | 48.186 | 30.885 | 0.00 | 0.00 |
| ATOM | 1375 | H    | ILE | 89 | 22.361 | 48.128 | 30.329 | 0.00 | 0.00 |
| ATOM | 1376 | CA   | ILE | 89 | 20.419 | 47.537 | 30.463 | 0.00 | 0.00 |
| ATOM | 1377 | HA   | ILE | 89 | 19.671 | 47.849 | 31.004 | 0.00 | 0.00 |
| ATOM | 1378 | CB   | ILE | 89 | 20.134 | 47.906 | 29.167 | 0.00 | 0.00 |
| ATOM | 1379 | HB   | ILE | 89 | 19.290 | 47.386 | 28.880 | 0.00 | 0.00 |
| ATOM | 1380 | CG2  | ILE | 89 | 19.875 | 49.251 | 29.114 | 0.00 | 0.00 |
| ATOM | 1381 | 1HG2 | ILE | 89 | 19.832 | 49.590 | 29.091 | 0.00 | 0.00 |
| ATOM | 1382 | 2HG2 | ILE | 89 | 19.781 | 49.575 | 29.081 | 0.00 | 0.00 |
| ATOM | 1383 | 3HG2 | ILE | 89 | 19.801 | 49.574 | 29.129 | 0.00 | 0.00 |
| ATOM | 1384 | CG1  | ILE | 89 | 21.131 | 47.627 | 28.307 | 0.00 | 0.00 |
| ATOM | 1385 | 2HG1 | ILE | 89 | 21.789 | 48.212 | 28.354 | 0.00 | 0.00 |
| ATOM | 1386 | 3HG1 | ILE | 89 | 21.447 | 46.892 | 28.478 | 0.00 | 0.00 |
| ATOM | 1387 | CD1  | ILE | 89 | 20.854 | 47.527 | 27.133 | 0.00 | 0.00 |
| ATOM | 1388 | 1HD1 | ILE | 89 | 20.771 | 47.506 | 26.839 | 0.00 | 0.00 |
| ATOM | 1389 | 2HD1 | ILE | 89 | 20.819 | 47.515 | 26.835 | 0.00 | 0.00 |
| ATOM | 1390 | 3HD1 | ILE | 89 | 20.791 | 47.478 | 26.868 | 0.00 | 0.00 |
| ATOM | 1391 | C    | ILE | 89 | 20.342 | 46.104 | 30.665 | 0.00 | 0.00 |
| ATOM | 1392 | O    | ILE | 89 | 19.780 | 45.492 | 30.075 | 0.00 | 0.00 |
| ATOM | 1393 | N    | ASN | 90 | 20.896 | 45.558 | 31.511 | 0.00 | 0.00 |
| ATOM | 1394 | H    | ASN | 90 | 21.344 | 46.111 | 31.955 | 0.00 | 0.00 |
| ATOM | 1395 | CA   | ASN | 90 | 20.912 | 44.211 | 31.831 | 0.00 | 0.00 |
| ATOM | 1396 | HA   | ASN | 90 | 21.102 | 43.691 | 31.024 | 0.00 | 0.00 |
| ATOM | 1397 | CB   | ASN | 90 | 21.993 | 43.947 | 32.723 | 0.00 | 0.00 |
| ATOM | 1398 | HB2  | ASN | 90 | 22.801 | 44.227 | 32.395 | 0.00 | 0.00 |
| ATOM | 1399 | HB3  | ASN | 90 | 21.877 | 44.403 | 33.474 | 0.00 | 0.00 |
| ATOM | 1400 | CG   | ASN | 90 | 22.176 | 42.692 | 33.055 | 0.00 | 0.00 |
| ATOM | 1401 | OD1  | ASN | 90 | 21.822 | 42.066 | 33.310 | 0.00 | 0.00 |
| ATOM | 1402 | OD2  | ASN | 90 | 22.733 | 42.288 | 33.053 | 0.00 | 0.00 |
| ATOM | 1403 | 1HD2 | ASN | 90 | 22.862 | 41.470 | 33.265 | 0.00 | 0.00 |
| ATOM | 1404 | 2HD2 | ASN | 90 | 23.032 | 42.800 | 32.847 | 0.00 | 0.00 |
| ATOM | 1405 | C    | ASN | 90 | 19.653 | 43.739 | 32.329 | 0.00 | 0.00 |
| ATOM | 1406 | O    | ASN | 90 | 19.321 | 42.742 | 32.099 | 0.00 | 0.00 |
| ATOM | 1407 | N    | ARG | 91 | 18.937 | 44.450 | 32.984 | 0.00 | 0.00 |
| ATOM | 1408 | H    | ARG | 91 | 19.267 | 45.261 | 33.122 | 0.00 | 0.00 |
| ATOM | 1409 | CA   | ARG | 91 | 17.671 | 44.140 | 33.439 | 0.00 | 0.00 |

|      |      |      |     |    |        |        |        |      |      |
|------|------|------|-----|----|--------|--------|--------|------|------|
| ATOM | 1410 | HA   | ARG | 91 | 17.667 | 43.160 | 33.625 | 0.00 | 0.00 |
| ATOM | 1411 | CB   | ARG | 91 | 17.390 | 44.833 | 34.633 | 0.00 | 0.00 |
| ATOM | 1412 | HB2  | ARG | 91 | 17.568 | 45.525 | 34.698 | 0.00 | 0.00 |
| ATOM | 1413 | HB3  | ARG | 91 | 16.693 | 44.890 | 34.783 | 0.00 | 0.00 |
| ATOM | 1414 | CG   | ARG | 91 | 17.782 | 44.525 | 35.553 | 0.00 | 0.00 |
| ATOM | 1415 | HG2  | ARG | 91 | 17.766 | 44.206 | 35.530 | 0.00 | 0.00 |
| ATOM | 1416 | HG3  | ARG | 91 | 18.132 | 44.431 | 35.632 | 0.00 | 0.00 |
| ATOM | 1417 | CD   | ARG | 91 | 17.715 | 44.786 | 36.423 | 0.00 | 0.00 |
| ATOM | 1418 | HD2  | ARG | 91 | 17.613 | 44.999 | 36.571 | 0.00 | 0.00 |
| ATOM | 1419 | HD3  | ARG | 91 | 17.552 | 44.766 | 36.504 | 0.00 | 0.00 |
| ATOM | 1420 | NE   | ARG | 91 | 17.997 | 44.784 | 36.960 | 0.00 | 0.00 |
| ATOM | 1421 | HE   | ARG | 91 | 18.118 | 44.731 | 36.919 | 0.00 | 0.00 |
| ATOM | 1422 | CZ   | ARG | 91 | 18.113 | 44.840 | 37.500 | 0.00 | 0.00 |
| ATOM | 1423 | NH1  | ARG | 91 | 17.989 | 44.911 | 37.641 | 0.00 | 0.00 |
| ATOM | 1424 | 1HH1 | ARG | 91 | 17.801 | 44.928 | 37.342 | 0.00 | 0.00 |
| ATOM | 1425 | 2HH1 | ARG | 91 | 18.088 | 44.951 | 38.053 | 0.00 | 0.00 |
| ATOM | 1426 | NH2  | ARG | 91 | 18.362 | 44.825 | 37.918 | 0.00 | 0.00 |
| ATOM | 1427 | 1HH2 | ARG | 91 | 18.468 | 44.771 | 37.828 | 0.00 | 0.00 |
| ATOM | 1428 | 2HH2 | ARG | 91 | 18.450 | 44.867 | 38.319 | 0.00 | 0.00 |
| ATOM | 1429 | C    | ARG | 91 | 16.647 | 44.406 | 32.470 | 0.00 | 0.00 |
| ATOM | 1430 | O    | ARG | 91 | 16.664 | 45.341 | 31.823 | 0.00 | 0.00 |
| ATOM | 1431 | N    | ARG | 92 | 15.758 | 43.590 | 32.378 | 0.00 | 0.00 |
| ATOM | 1432 | H    | ARG | 92 | 15.836 | 42.882 | 32.975 | 0.00 | 0.00 |
| ATOM | 1433 | CA   | ARG | 92 | 14.746 | 43.558 | 31.453 | 0.00 | 0.00 |
| ATOM | 1434 | HA   | ARG | 92 | 14.275 | 42.719 | 31.646 | 0.00 | 0.00 |
| ATOM | 1435 | CB   | ARG | 92 | 13.819 | 44.611 | 31.668 | 0.00 | 0.00 |
| ATOM | 1436 | HB2  | ARG | 92 | 13.747 | 44.931 | 32.215 | 0.00 | 0.00 |
| ATOM | 1437 | HB3  | ARG | 92 | 13.877 | 45.074 | 31.338 | 0.00 | 0.00 |
| ATOM | 1438 | CG   | ARG | 92 | 12.888 | 44.630 | 31.604 | 0.00 | 0.00 |
| ATOM | 1439 | HG2  | ARG | 92 | 12.811 | 44.418 | 31.361 | 0.00 | 0.00 |
| ATOM | 1440 | HG3  | ARG | 92 | 12.837 | 44.445 | 31.764 | 0.00 | 0.00 |
| ATOM | 1441 | CD   | ARG | 92 | 12.115 | 45.210 | 31.664 | 0.00 | 0.00 |
| ATOM | 1442 | HD2  | ARG | 92 | 11.980 | 45.212 | 31.996 | 0.00 | 0.00 |
| ATOM | 1443 | HD3  | ARG | 92 | 12.219 | 45.522 | 31.757 | 0.00 | 0.00 |
| ATOM | 1444 | NE   | ARG | 92 | 11.418 | 45.351 | 31.175 | 0.00 | 0.00 |
| ATOM | 1445 | HE   | ARG | 92 | 11.382 | 45.213 | 30.981 | 0.00 | 0.00 |
| ATOM | 1446 | CZ   | ARG | 92 | 10.825 | 45.642 | 30.956 | 0.00 | 0.00 |
| ATOM | 1447 | NH1  | ARG | 92 | 10.763 | 45.855 | 31.160 | 0.00 | 0.00 |
| ATOM | 1448 | 1HH1 | ARG | 92 | 11.164 | 45.806 | 31.503 | 0.00 | 0.00 |
| ATOM | 1449 | 2HH1 | ARG | 92 | 10.298 | 46.066 | 30.978 | 0.00 | 0.00 |
| ATOM | 1450 | NH2  | ARG | 92 | 10.270 | 45.726 | 30.511 | 0.00 | 0.00 |
| ATOM | 1451 | 1HH2 | ARG | 92 | 10.300 | 45.567 | 30.335 | 0.00 | 0.00 |
| ATOM | 1452 | 2HH2 | ARG | 92 | 9.826  | 45.946 | 30.343 | 0.00 | 0.00 |
| ATOM | 1453 | C    | ARG | 92 | 15.107 | 43.442 | 30.078 | 0.00 | 0.00 |
| ATOM | 1454 | O    | ARG | 92 | 14.516 | 42.877 | 29.457 | 0.00 | 0.00 |
| ATOM | 1455 | N    | TYR | 93 | 16.044 | 43.941 | 29.594 | 0.00 | 0.00 |
| ATOM | 1456 | H    | TYR | 93 | 16.480 | 44.409 | 30.160 | 0.00 | 0.00 |
| ATOM | 1457 | CA   | TYR | 93 | 16.371 | 43.967 | 28.259 | 0.00 | 0.00 |
| ATOM | 1458 | HA   | TYR | 93 | 15.509 | 43.856 | 27.715 | 0.00 | 0.00 |
| ATOM | 1459 | CB   | TYR | 93 | 16.873 | 45.267 | 27.934 | 0.00 | 0.00 |
| ATOM | 1460 | HB2  | TYR | 93 | 17.756 | 45.366 | 28.406 | 0.00 | 0.00 |
| ATOM | 1461 | HB3  | TYR | 93 | 17.065 | 45.270 | 26.954 | 0.00 | 0.00 |
| ATOM | 1462 | CG   | TYR | 93 | 16.010 | 46.421 | 28.242 | 0.00 | 0.00 |
| ATOM | 1463 | CD1  | TYR | 93 | 15.172 | 46.780 | 27.797 | 0.00 | 0.00 |
| ATOM | 1464 | HD1  | TYR | 93 | 15.131 | 46.236 | 27.236 | 0.00 | 0.00 |
| ATOM | 1465 | CE1  | TYR | 93 | 14.394 | 47.853 | 28.086 | 0.00 | 0.00 |
| ATOM | 1466 | HE1  | TYR | 93 | 13.758 | 48.131 | 27.750 | 0.00 | 0.00 |
| ATOM | 1467 | CZ   | TYR | 93 | 14.451 | 48.576 | 28.820 | 0.00 | 0.00 |
| ATOM | 1468 | OH   | TYR | 93 | 13.702 | 49.604 | 29.102 | 0.00 | 0.00 |
| ATOM | 1469 | HH   | TYR | 93 | 13.785 | 49.979 | 29.588 | 0.00 | 0.00 |
| ATOM | 1470 | CE2  | TYR | 93 | 15.286 | 48.218 | 29.265 | 0.00 | 0.00 |
| ATOM | 1471 | HE2  | TYR | 93 | 15.333 | 48.766 | 29.827 | 0.00 | 0.00 |
| ATOM | 1472 | CD2  | TYR | 93 | 16.062 | 47.144 | 28.977 | 0.00 | 0.00 |
| ATOM | 1473 | HD2  | TYR | 93 | 16.701 | 46.875 | 29.324 | 0.00 | 0.00 |
| ATOM | 1474 | C    | TYR | 93 | 17.307 | 42.871 | 27.850 | 0.00 | 0.00 |
| ATOM | 1475 | O    | TYR | 93 | 17.115 | 42.290 | 26.931 | 0.00 | 0.00 |
| ATOM | 1476 | N    | ASP | 94 | 18.289 | 42.538 | 28.544 | 0.00 | 0.00 |
| ATOM | 1477 | H    | ASP | 94 | 18.426 | 43.060 | 29.284 | 0.00 | 0.00 |
| ATOM | 1478 | CA   | ASP | 94 | 19.203 | 41.464 | 28.244 | 0.00 | 0.00 |
| ATOM | 1479 | HA   | ASP | 94 | 19.403 | 41.472 | 27.209 | 0.00 | 0.00 |
| ATOM | 1480 | CB   | ASP | 94 | 20.486 | 41.706 | 28.964 | 0.00 | 0.00 |
| ATOM | 1481 | HB2  | ASP | 94 | 20.818 | 42.656 | 28.735 | 0.00 | 0.00 |
| ATOM | 1482 | HB3  | ASP | 94 | 20.317 | 41.675 | 29.984 | 0.00 | 0.00 |
| ATOM | 1483 | CG   | ASP | 94 | 21.559 | 40.744 | 28.627 | 0.00 | 0.00 |
| ATOM | 1484 | OD1  | ASP | 94 | 22.015 | 40.484 | 28.309 | 0.00 | 0.00 |
| ATOM | 1485 | OD2  | ASP | 94 | 21.994 | 40.266 | 28.696 | 0.00 | 0.00 |
| ATOM | 1486 | C    | ASP | 94 | 18.642 | 40.112 | 28.549 | 0.00 | 0.00 |
| ATOM | 1487 | O    | ASP | 94 | 18.947 | 39.166 | 27.897 | 0.00 | 0.00 |
| ATOM | 1488 | N    | SER | 95 | 17.761 | 40.023 | 29.488 | 0.00 | 0.00 |
| ATOM | 1489 | H    | SER | 95 | 17.565 | 40.822 | 29.996 | 0.00 | 0.00 |
| ATOM | 1490 | CA   | SER | 95 | 17.040 | 38.839 | 29.817 | 0.00 | 0.00 |
| ATOM | 1491 | HA   | SER | 95 | 17.729 | 38.057 | 29.922 | 0.00 | 0.00 |
| ATOM | 1492 | CB   | SER | 95 | 16.360 | 39.027 | 31.110 | 0.00 | 0.00 |
| ATOM | 1493 | HB2  | SER | 95 | 15.774 | 38.828 | 31.238 | 0.00 | 0.00 |
| ATOM | 1494 | HB3  | SER | 95 | 16.585 | 38.785 | 31.610 | 0.00 | 0.00 |
| ATOM | 1495 | OG   | SER | 95 | 16.198 | 39.756 | 31.522 | 0.00 | 0.00 |
| ATOM | 1496 | HG   | SER | 95 | 15.979 | 39.719 | 31.777 | 0.00 | 0.00 |
| ATOM | 1497 | C    | SER | 95 | 16.049 | 38.403 | 28.780 | 0.00 | 0.00 |
| ATOM | 1498 | O    | SER | 95 | 15.724 | 37.275 | 28.713 | 0.00 | 0.00 |
| ATOM | 1499 | N    | GLU | 96 | 15.591 | 39.260 | 27.939 | 0.00 | 0.00 |
| ATOM | 1500 | H    | GLU | 96 | 15.899 | 40.167 | 28.027 | 0.00 | 0.00 |
| ATOM | 1501 | CA   | GLU | 96 | 14.672 | 38.946 | 26.889 | 0.00 | 0.00 |
| ATOM | 1502 | HA   | GLU | 96 | 13.969 | 38.254 | 27.261 | 0.00 | 0.00 |
| ATOM | 1503 | CB   | GLU | 96 | 13.925 | 40.188 | 26.473 | 0.00 | 0.00 |
| ATOM | 1504 | HB2  | GLU | 96 | 13.994 | 40.838 | 26.976 | 0.00 | 0.00 |
| ATOM | 1505 | HB3  | GLU | 96 | 14.181 | 40.501 | 25.762 | 0.00 | 0.00 |
| ATOM | 1506 | CG   | GLU | 96 | 12.739 | 40.178 | 26.315 | 0.00 | 0.00 |
| ATOM | 1507 | HG2  | GLU | 96 | 12.630 | 40.916 | 26.137 | 0.00 | 0.00 |
| ATOM | 1508 | HG3  | GLU | 96 | 12.682 | 39.835 | 25.675 | 0.00 | 0.00 |
| ATOM | 1509 | CD   | GLU | 96 | 11.775 | 39.688 | 27.246 | 0.00 | 0.00 |
| ATOM | 1510 | OE1  | GLU | 96 | 11.423 | 39.426 | 27.617 | 0.00 | 0.00 |
| ATOM | 1511 | OE2  | GLU | 96 | 11.361 | 39.564 | 27.633 | 0.00 | 0.00 |
| ATOM | 1512 | C    | GLU | 96 | 15.349 | 38.269 | 25.725 | 0.00 | 0.00 |
| ATOM | 1513 | O    | GLU | 96 | 14.767 | 37.430 | 25.104 | 0.00 | 0.00 |
| ATOM | 1514 | N    | PHE | 97 | 16.602 | 38.543 | 25.473 | 0.00 | 0.00 |

|      |      |      |     |     |        |        |        |      |      |
|------|------|------|-----|-----|--------|--------|--------|------|------|
| ATOM | 1515 | H    | PHE | 97  | 17.032 | 39.241 | 26.001 | 0.00 | 0.00 |
| ATOM | 1516 | CA   | PHE | 97  | 17.375 | 37.859 | 24.469 | 0.00 | 0.00 |
| ATOM | 1517 | HA   | PHE | 97  | 16.858 | 37.927 | 23.540 | 0.00 | 0.00 |
| ATOM | 1518 | CB   | PHE | 97  | 18.720 | 38.512 | 24.299 | 0.00 | 0.00 |
| ATOM | 1519 | HB2  | PHE | 97  | 19.243 | 38.419 | 25.195 | 0.00 | 0.00 |
| ATOM | 1520 | HB3  | PHE | 97  | 19.259 | 37.980 | 23.584 | 0.00 | 0.00 |
| ATOM | 1521 | CG   | PHE | 97  | 18.742 | 39.924 | 23.885 | 0.00 | 0.00 |
| ATOM | 1522 | CD1  | PHE | 97  | 18.103 | 40.364 | 22.894 | 0.00 | 0.00 |
| ATOM | 1523 | HD1  | PHE | 97  | 17.575 | 39.708 | 22.417 | 0.00 | 0.00 |
| ATOM | 1524 | CE1  | PHE | 97  | 18.149 | 41.666 | 22.519 | 0.00 | 0.00 |
| ATOM | 1525 | HE1  | PHE | 97  | 17.661 | 41.998 | 21.761 | 0.00 | 0.00 |
| ATOM | 1526 | CZ   | PHE | 97  | 18.829 | 42.537 | 23.134 | 0.00 | 0.00 |
| ATOM | 1527 | HZ   | PHE | 97  | 18.858 | 43.533 | 22.853 | 0.00 | 0.00 |
| ATOM | 1528 | CE2  | PHE | 97  | 19.476 | 42.103 | 24.112 | 0.00 | 0.00 |
| ATOM | 1529 | HE2  | PHE | 97  | 19.999 | 42.766 | 24.583 | 0.00 | 0.00 |
| ATOM | 1530 | CD2  | PHE | 97  | 19.437 | 40.800 | 24.480 | 0.00 | 0.00 |
| ATOM | 1531 | HD2  | PHE | 97  | 19.940 | 40.477 | 25.229 | 0.00 | 0.00 |
| ATOM | 1532 | C    | PHE | 97  | 17.538 | 36.385 | 24.772 | 0.00 | 0.00 |
| ATOM | 1533 | O    | PHE | 97  | 17.600 | 35.597 | 23.878 | 0.00 | 0.00 |
| ATOM | 1534 | N    | GLN | 98  | 17.538 | 35.991 | 26.015 | 0.00 | 0.00 |
| ATOM | 1535 | H    | GLN | 98  | 17.499 | 36.681 | 26.702 | 0.00 | 0.00 |
| ATOM | 1536 | CA   | GLN | 98  | 17.565 | 34.609 | 26.424 | 0.00 | 0.00 |
| ATOM | 1537 | HA   | GLN | 98  | 18.347 | 34.121 | 25.908 | 0.00 | 0.00 |
| ATOM | 1538 | CB   | GLN | 98  | 17.851 | 34.530 | 27.882 | 0.00 | 0.00 |
| ATOM | 1539 | HB2  | GLN | 98  | 17.720 | 34.949 | 28.272 | 0.00 | 0.00 |
| ATOM | 1540 | HB3  | GLN | 98  | 17.625 | 34.125 | 28.241 | 0.00 | 0.00 |
| ATOM | 1541 | CG   | GLN | 98  | 18.621 | 34.417 | 28.361 | 0.00 | 0.00 |
| ATOM | 1542 | HG2  | GLN | 98  | 18.773 | 34.439 | 28.273 | 0.00 | 0.00 |
| ATOM | 1543 | HG3  | GLN | 98  | 18.604 | 34.510 | 28.415 | 0.00 | 0.00 |
| ATOM | 1544 | CD   | GLN | 98  | 19.219 | 34.152 | 28.922 | 0.00 | 0.00 |
| ATOM | 1545 | OE1  | GLN | 98  | 19.365 | 33.790 | 28.995 | 0.00 | 0.00 |
| ATOM | 1546 | NE2  | GLN | 98  | 19.588 | 34.320 | 29.340 | 0.00 | 0.00 |
| ATOM | 1547 | 1HE2 | GLN | 98  | 19.979 | 34.145 | 29.715 | 0.00 | 0.00 |
| ATOM | 1548 | 2HE2 | GLN | 98  | 19.481 | 34.618 | 29.299 | 0.00 | 0.00 |
| ATOM | 1549 | C    | GLN | 98  | 16.309 | 33.866 | 26.078 | 0.00 | 0.00 |
| ATOM | 1550 | O    | GLN | 98  | 16.363 | 32.725 | 25.773 | 0.00 | 0.00 |
| ATOM | 1551 | N    | THR | 99  | 15.188 | 34.511 | 26.047 | 0.00 | 0.00 |
| ATOM | 1552 | H    | THR | 99  | 15.194 | 35.440 | 26.313 | 0.00 | 0.00 |
| ATOM | 1553 | CA   | THR | 99  | 13.937 | 33.948 | 25.628 | 0.00 | 0.00 |
| ATOM | 1554 | HA   | THR | 99  | 13.826 | 33.003 | 26.080 | 0.00 | 0.00 |
| ATOM | 1555 | CB   | THR | 99  | 12.803 | 34.805 | 26.076 | 0.00 | 0.00 |
| ATOM | 1556 | HB   | THR | 99  | 12.611 | 35.389 | 25.576 | 0.00 | 0.00 |
| ATOM | 1557 | CG2  | THR | 99  | 11.770 | 34.331 | 26.291 | 0.00 | 0.00 |
| ATOM | 1558 | 1HG2 | THR | 99  | 11.508 | 34.224 | 26.337 | 0.00 | 0.00 |
| ATOM | 1559 | 2HG2 | THR | 99  | 11.521 | 34.209 | 26.335 | 0.00 | 0.00 |
| ATOM | 1560 | 3HG2 | THR | 99  | 11.515 | 34.221 | 26.353 | 0.00 | 0.00 |
| ATOM | 1561 | OG1  | THR | 99  | 12.905 | 35.336 | 26.988 | 0.00 | 0.00 |
| ATOM | 1562 | HG1  | THR | 99  | 12.771 | 35.952 | 27.116 | 0.00 | 0.00 |
| ATOM | 1563 | C    | THR | 99  | 13.874 | 33.719 | 24.155 | 0.00 | 0.00 |
| ATOM | 1564 | O    | THR | 99  | 13.225 | 32.886 | 23.711 | 0.00 | 0.00 |
| ATOM | 1565 | N    | MET | 100 | 14.593 | 34.410 | 23.385 | 0.00 | 0.00 |
| ATOM | 1566 | H    | MET | 100 | 15.082 | 35.092 | 23.805 | 0.00 | 0.00 |
| ATOM | 1567 | CA   | MET | 100 | 14.723 | 34.229 | 21.969 | 0.00 | 0.00 |
| ATOM | 1568 | HA   | MET | 100 | 13.788 | 33.946 | 21.578 | 0.00 | 0.00 |
| ATOM | 1569 | CB   | MET | 100 | 15.114 | 35.531 | 21.328 | 0.00 | 0.00 |
| ATOM | 1570 | HB2  | MET | 100 | 15.928 | 35.765 | 21.616 | 0.00 | 0.00 |
| ATOM | 1571 | HB3  | MET | 100 | 15.168 | 35.464 | 20.419 | 0.00 | 0.00 |
| ATOM | 1572 | CG   | MET | 100 | 14.342 | 36.620 | 21.496 | 0.00 | 0.00 |
| ATOM | 1573 | HG2  | MET | 100 | 13.625 | 36.461 | 21.078 | 0.00 | 0.00 |
| ATOM | 1574 | HG3  | MET | 100 | 14.155 | 36.639 | 22.327 | 0.00 | 0.00 |
| ATOM | 1575 | SD   | MET | 100 | 14.823 | 38.146 | 21.063 | 0.00 | 0.00 |
| ATOM | 1576 | CE   | MET | 100 | 13.793 | 39.130 | 21.827 | 0.00 | 0.00 |
| ATOM | 1577 | HE1  | MET | 100 | 13.602 | 39.339 | 21.984 | 0.00 | 0.00 |
| ATOM | 1578 | HE2  | MET | 100 | 13.577 | 39.336 | 21.966 | 0.00 | 0.00 |
| ATOM | 1579 | HE3  | MET | 100 | 13.582 | 39.316 | 21.996 | 0.00 | 0.00 |
| ATOM | 1580 | C    | MET | 100 | 15.685 | 33.121 | 21.610 | 0.00 | 0.00 |
| ATOM | 1581 | O    | MET | 100 | 15.507 | 32.452 | 20.673 | 0.00 | 0.00 |
| ATOM | 1582 | N    | LEU | 101 | 16.681 | 32.883 | 22.372 | 0.00 | 0.00 |
| ATOM | 1583 | H    | LEU | 101 | 16.774 | 33.467 | 23.121 | 0.00 | 0.00 |
| ATOM | 1584 | CA   | LEU | 101 | 17.689 | 31.887 | 22.139 | 0.00 | 0.00 |
| ATOM | 1585 | HA   | LEU | 101 | 17.957 | 31.925 | 21.124 | 0.00 | 0.00 |
| ATOM | 1586 | CB   | LEU | 101 | 18.889 | 32.227 | 22.957 | 0.00 | 0.00 |
| ATOM | 1587 | HB2  | LEU | 101 | 18.807 | 32.737 | 23.535 | 0.00 | 0.00 |
| ATOM | 1588 | HB3  | LEU | 101 | 19.145 | 31.640 | 23.319 | 0.00 | 0.00 |
| ATOM | 1589 | CG   | LEU | 101 | 19.871 | 32.658 | 22.573 | 0.00 | 0.00 |
| ATOM | 1590 | HG   | LEU | 101 | 19.543 | 32.667 | 22.568 | 0.00 | 0.00 |
| ATOM | 1591 | CD1  | LEU | 101 | 20.669 | 32.979 | 22.492 | 0.00 | 0.00 |
| ATOM | 1592 | 1HD1 | LEU | 101 | 20.840 | 33.072 | 22.510 | 0.00 | 0.00 |
| ATOM | 1593 | 2HD1 | LEU | 101 | 20.841 | 33.069 | 22.447 | 0.00 | 0.00 |
| ATOM | 1594 | 3HD1 | LEU | 101 | 20.906 | 33.030 | 22.463 | 0.00 | 0.00 |
| ATOM | 1595 | CD2  | LEU | 101 | 20.565 | 32.783 | 22.305 | 0.00 | 0.00 |
| ATOM | 1596 | 1HD2 | LEU | 101 | 20.688 | 32.825 | 22.247 | 0.00 | 0.00 |
| ATOM | 1597 | 2HD2 | LEU | 101 | 20.798 | 32.816 | 22.233 | 0.00 | 0.00 |
| ATOM | 1598 | 3HD2 | LEU | 101 | 20.713 | 32.804 | 22.243 | 0.00 | 0.00 |
| ATOM | 1599 | C    | LEU | 101 | 17.226 | 30.477 | 22.380 | 0.00 | 0.00 |
| ATOM | 1600 | O    | LEU | 101 | 17.788 | 29.576 | 21.855 | 0.00 | 0.00 |
| ATOM | 1601 | N    | GLN | 102 | 16.173 | 30.269 | 23.110 | 0.00 | 0.00 |
| ATOM | 1602 | H    | GLN | 102 | 15.772 | 31.038 | 23.530 | 0.00 | 0.00 |
| ATOM | 1603 | CA   | GLN | 102 | 15.586 | 28.986 | 23.361 | 0.00 | 0.00 |
| ATOM | 1604 | HA   | GLN | 102 | 16.355 | 28.346 | 23.647 | 0.00 | 0.00 |
| ATOM | 1605 | CB   | GLN | 102 | 14.632 | 29.073 | 24.495 | 0.00 | 0.00 |
| ATOM | 1606 | HB2  | GLN | 102 | 14.411 | 28.993 | 24.656 | 0.00 | 0.00 |
| ATOM | 1607 | HB3  | GLN | 102 | 14.516 | 29.063 | 24.830 | 0.00 | 0.00 |
| ATOM | 1608 | CG   | GLN | 102 | 14.132 | 29.242 | 25.006 | 0.00 | 0.00 |
| ATOM | 1609 | HG2  | GLN | 102 | 14.223 | 29.096 | 24.759 | 0.00 | 0.00 |
| ATOM | 1610 | HG3  | GLN | 102 | 14.129 | 29.225 | 25.101 | 0.00 | 0.00 |
| ATOM | 1611 | CD   | GLN | 102 | 13.499 | 29.619 | 25.747 | 0.00 | 0.00 |
| ATOM | 1612 | OE1  | GLN | 102 | 13.206 | 29.752 | 25.749 | 0.00 | 0.00 |
| ATOM | 1613 | NE2  | GLN | 102 | 13.264 | 29.806 | 26.398 | 0.00 | 0.00 |
| ATOM | 1614 | 1HE2 | GLN | 102 | 12.858 | 30.050 | 26.877 | 0.00 | 0.00 |
| ATOM | 1615 | 2HE2 | GLN | 102 | 13.494 | 29.699 | 26.420 | 0.00 | 0.00 |
| ATOM | 1616 | C    | GLN | 102 | 14.947 | 28.355 | 22.170 | 0.00 | 0.00 |
| ATOM | 1617 | O    | GLN | 102 | 14.717 | 27.222 | 22.162 | 0.00 | 0.00 |
| ATOM | 1618 | N    | HIP | 103 | 14.682 | 29.067 | 21.152 | 0.00 | 0.00 |
| ATOM | 1619 | H    | HIP | 103 | 14.882 | 29.991 | 21.231 | 0.00 | 0.00 |

|      |      |      |     |     |        |        |        |      |      |
|------|------|------|-----|-----|--------|--------|--------|------|------|
| ATOM | 1620 | CA   | HIP | 103 | 14.107 | 28.598 | 19.931 | 0.00 | 0.00 |
| ATOM | 1621 | HA   | HIP | 103 | 13.631 | 27.688 | 20.125 | 0.00 | 0.00 |
| ATOM | 1622 | CB   | HIP | 103 | 13.065 | 29.550 | 19.492 | 0.00 | 0.00 |
| ATOM | 1623 | HB2  | HIP | 103 | 13.464 | 30.430 | 19.323 | 0.00 | 0.00 |
| ATOM | 1624 | HB3  | HIP | 103 | 12.685 | 29.256 | 18.627 | 0.00 | 0.00 |
| ATOM | 1625 | CG   | HIP | 103 | 11.993 | 29.729 | 20.373 | 0.00 | 0.00 |
| ATOM | 1626 | ND1  | HIP | 103 | 11.181 | 29.059 | 20.856 | 0.00 | 0.00 |
| ATOM | 1627 | HD1  | HIP | 103 | 11.192 | 28.369 | 20.677 | 0.00 | 0.00 |
| ATOM | 1628 | CE1  | HIP | 103 | 10.368 | 29.493 | 21.599 | 0.00 | 0.00 |
| ATOM | 1629 | HE1  | HIP | 103 | 9.627  | 29.154 | 22.107 | 0.00 | 0.00 |
| ATOM | 1630 | NE2  | HIP | 103 | 10.638 | 30.418 | 21.599 | 0.00 | 0.00 |
| ATOM | 1631 | HE2  | HIP | 103 | 10.180 | 30.900 | 22.077 | 0.00 | 0.00 |
| ATOM | 1632 | CD2  | HIP | 103 | 11.652 | 30.578 | 20.835 | 0.00 | 0.00 |
| ATOM | 1633 | HD2  | HIP | 103 | 12.100 | 31.240 | 20.638 | 0.00 | 0.00 |
| ATOM | 1634 | C    | HIP | 103 | 15.099 | 28.296 | 18.838 | 0.00 | 0.00 |
| ATOM | 1635 | O    | HIP | 103 | 14.756 | 27.953 | 17.788 | 0.00 | 0.00 |
| ATOM | 1636 | N    | LEU | 104 | 16.320 | 28.409 | 19.070 | 0.00 | 0.00 |
| ATOM | 1637 | H    | LEU | 104 | 16.529 | 28.675 | 19.949 | 0.00 | 0.00 |
| ATOM | 1638 | CA   | LEU | 104 | 17.382 | 28.101 | 18.154 | 0.00 | 0.00 |
| ATOM | 1639 | HA   | LEU | 104 | 17.060 | 28.257 | 17.182 | 0.00 | 0.00 |
| ATOM | 1640 | CB   | LEU | 104 | 18.497 | 28.995 | 18.400 | 0.00 | 0.00 |
| ATOM | 1641 | HB2  | LEU | 104 | 18.475 | 29.284 | 18.838 | 0.00 | 0.00 |
| ATOM | 1642 | HB3  | LEU | 104 | 18.947 | 28.751 | 18.488 | 0.00 | 0.00 |
| ATOM | 1643 | CG   | LEU | 104 | 19.075 | 29.820 | 17.961 | 0.00 | 0.00 |
| ATOM | 1644 | HG   | LEU | 104 | 18.928 | 29.580 | 18.078 | 0.00 | 0.00 |
| ATOM | 1645 | CD1  | LEU | 104 | 19.455 | 30.373 | 17.634 | 0.00 | 0.00 |
| ATOM | 1646 | 1HD1 | LEU | 104 | 19.531 | 30.510 | 17.600 | 0.00 | 0.00 |
| ATOM | 1647 | 2HD1 | LEU | 104 | 19.588 | 30.482 | 17.530 | 0.00 | 0.00 |
| ATOM | 1648 | 3HD1 | LEU | 104 | 19.523 | 30.524 | 17.531 | 0.00 | 0.00 |
| ATOM | 1649 | CD2  | LEU | 104 | 19.536 | 30.472 | 17.699 | 0.00 | 0.00 |
| ATOM | 1650 | 1HD2 | LEU | 104 | 19.652 | 30.629 | 17.601 | 0.00 | 0.00 |
| ATOM | 1651 | 2HD2 | LEU | 104 | 19.622 | 30.628 | 17.674 | 0.00 | 0.00 |
| ATOM | 1652 | 3HD2 | LEU | 104 | 19.664 | 30.628 | 17.633 | 0.00 | 0.00 |
| ATOM | 1653 | C    | LEU | 104 | 17.798 | 26.697 | 18.234 | 0.00 | 0.00 |
| ATOM | 1654 | O    | LEU | 104 | 17.846 | 26.175 | 19.266 | 0.00 | 0.00 |
| ATOM | 1655 | N    | GLN | 105 | 18.133 | 26.096 | 17.150 | 0.00 | 0.00 |
| ATOM | 1656 | H    | GLN | 105 | 18.075 | 26.589 | 16.347 | 0.00 | 0.00 |
| ATOM | 1657 | CA   | GLN | 105 | 18.661 | 24.798 | 17.056 | 0.00 | 0.00 |
| ATOM | 1658 | HA   | GLN | 105 | 18.220 | 24.243 | 17.817 | 0.00 | 0.00 |
| ATOM | 1659 | CB   | GLN | 105 | 18.323 | 24.213 | 15.764 | 0.00 | 0.00 |
| ATOM | 1660 | HB2  | GLN | 105 | 18.665 | 24.751 | 15.037 | 0.00 | 0.00 |
| ATOM | 1661 | HB3  | GLN | 105 | 18.747 | 23.352 | 15.658 | 0.00 | 0.00 |
| ATOM | 1662 | CG   | GLN | 105 | 16.979 | 24.032 | 15.553 | 0.00 | 0.00 |
| ATOM | 1663 | HG2  | GLN | 105 | 16.625 | 24.137 | 15.889 | 0.00 | 0.00 |
| ATOM | 1664 | HG3  | GLN | 105 | 16.684 | 24.245 | 15.206 | 0.00 | 0.00 |
| ATOM | 1665 | CD   | GLN | 105 | 16.484 | 23.415 | 15.328 | 0.00 | 0.00 |
| ATOM | 1666 | OE1  | GLN | 105 | 16.782 | 23.059 | 15.312 | 0.00 | 0.00 |
| ATOM | 1667 | NE2  | GLN | 105 | 15.712 | 23.260 | 15.147 | 0.00 | 0.00 |
| ATOM | 1668 | 1HE2 | GLN | 105 | 15.395 | 22.859 | 14.999 | 0.00 | 0.00 |
| ATOM | 1669 | 2HE2 | GLN | 105 | 15.452 | 23.540 | 15.154 | 0.00 | 0.00 |
| ATOM | 1670 | C    | GLN | 105 | 20.113 | 24.771 | 17.236 | 0.00 | 0.00 |
| ATOM | 1671 | O    | GLN | 105 | 20.728 | 25.722 | 17.023 | 0.00 | 0.00 |
| ATOM | 1672 | N    | PRO | 106 | 20.703 | 23.709 | 17.600 | 0.00 | 0.00 |
| ATOM | 1673 | CD   | PRO | 106 | 20.091 | 22.552 | 17.984 | 0.00 | 0.00 |
| ATOM | 1674 | HD2  | PRO | 106 | 19.785 | 22.050 | 17.190 | 0.00 | 0.00 |
| ATOM | 1675 | HD3  | PRO | 106 | 19.314 | 22.724 | 18.620 | 0.00 | 0.00 |
| ATOM | 1676 | CG   | PRO | 106 | 21.063 | 21.789 | 18.641 | 0.00 | 0.00 |
| ATOM | 1677 | HG2  | PRO | 106 | 21.155 | 21.006 | 18.245 | 0.00 | 0.00 |
| ATOM | 1678 | HG3  | PRO | 106 | 20.852 | 21.691 | 19.512 | 0.00 | 0.00 |
| ATOM | 1679 | CB   | PRO | 106 | 22.223 | 22.407 | 18.557 | 0.00 | 0.00 |
| ATOM | 1680 | HB2  | PRO | 106 | 22.479 | 22.518 | 19.397 | 0.00 | 0.00 |
| ATOM | 1681 | HB3  | PRO | 106 | 22.810 | 21.898 | 18.114 | 0.00 | 0.00 |
| ATOM | 1682 | CA   | PRO | 106 | 22.064 | 23.627 | 17.877 | 0.00 | 0.00 |
| ATOM | 1683 | HA   | PRO | 106 | 22.274 | 24.360 | 18.518 | 0.00 | 0.00 |
| ATOM | 1684 | C    | PRO | 106 | 23.006 | 23.721 | 16.742 | 0.00 | 0.00 |
| ATOM | 1685 | O    | PRO | 106 | 24.098 | 23.684 | 16.926 | 0.00 | 0.00 |
| ATOM | 1686 | N    | THR | 107 | 22.611 | 23.837 | 15.575 | 0.00 | 0.00 |
| ATOM | 1687 | H    | THR | 107 | 21.714 | 23.891 | 15.483 | 0.00 | 0.00 |
| ATOM | 1688 | CA   | THR | 107 | 23.399 | 23.902 | 14.396 | 0.00 | 0.00 |
| ATOM | 1689 | HA   | THR | 107 | 24.333 | 23.530 | 14.592 | 0.00 | 0.00 |
| ATOM | 1690 | CB   | THR | 107 | 22.848 | 23.097 | 13.355 | 0.00 | 0.00 |
| ATOM | 1691 | HB   | THR | 107 | 23.239 | 23.176 | 12.661 | 0.00 | 0.00 |
| ATOM | 1692 | CG2  | THR | 107 | 22.823 | 21.977 | 13.504 | 0.00 | 0.00 |
| ATOM | 1693 | 1HG2 | THR | 107 | 22.837 | 21.708 | 13.549 | 0.00 | 0.00 |
| ATOM | 1694 | 2HG2 | THR | 107 | 22.803 | 21.692 | 13.538 | 0.00 | 0.00 |
| ATOM | 1695 | 3HG2 | THR | 107 | 22.821 | 21.708 | 13.519 | 0.00 | 0.00 |
| ATOM | 1696 | OG1  | THR | 107 | 21.843 | 23.251 | 13.087 | 0.00 | 0.00 |
| ATOM | 1697 | HG1  | THR | 107 | 21.589 | 22.929 | 12.578 | 0.00 | 0.00 |
| ATOM | 1698 | C    | THR | 107 | 23.585 | 25.246 | 13.914 | 0.00 | 0.00 |
| ATOM | 1699 | O    | THR | 107 | 22.746 | 26.028 | 14.016 | 0.00 | 0.00 |
| ATOM | 1700 | N    | ALA | 108 | 24.685 | 25.529 | 13.367 | 0.00 | 0.00 |
| ATOM | 1701 | H    | ALA | 108 | 25.329 | 24.851 | 13.287 | 0.00 | 0.00 |
| ATOM | 1702 | CA   | ALA | 108 | 25.017 | 26.779 | 12.912 | 0.00 | 0.00 |
| ATOM | 1703 | HA   | ALA | 108 | 24.820 | 27.422 | 13.667 | 0.00 | 0.00 |
| ATOM | 1704 | CB   | ALA | 108 | 26.422 | 26.803 | 12.610 | 0.00 | 0.00 |
| ATOM | 1705 | HB1  | ALA | 108 | 26.767 | 26.802 | 12.545 | 0.00 | 0.00 |
| ATOM | 1706 | HB2  | ALA | 108 | 26.758 | 26.808 | 12.523 | 0.00 | 0.00 |
| ATOM | 1707 | HB3  | ALA | 108 | 26.758 | 26.828 | 12.542 | 0.00 | 0.00 |
| ATOM | 1708 | C    | ALA | 108 | 24.257 | 27.227 | 11.783 | 0.00 | 0.00 |
| ATOM | 1709 | O    | ALA | 108 | 23.931 | 28.278 | 11.688 | 0.00 | 0.00 |
| ATOM | 1710 | N    | GLU | 109 | 23.914 | 26.431 | 10.957 | 0.00 | 0.00 |
| ATOM | 1711 | H    | GLU | 109 | 24.227 | 25.589 | 11.068 | 0.00 | 0.00 |
| ATOM | 1712 | CA   | GLU | 109 | 23.165 | 26.740 | 9.861  | 0.00 | 0.00 |
| ATOM | 1713 | HA   | GLU | 109 | 23.586 | 27.521 | 9.400  | 0.00 | 0.00 |
| ATOM | 1714 | CB   | GLU | 109 | 23.231 | 25.662 | 8.951  | 0.00 | 0.00 |
| ATOM | 1715 | HB2  | GLU | 109 | 23.223 | 25.382 | 8.744  | 0.00 | 0.00 |
| ATOM | 1716 | HB3  | GLU | 109 | 23.235 | 25.478 | 8.727  | 0.00 | 0.00 |
| ATOM | 1717 | CG   | GLU | 109 | 23.313 | 25.215 | 8.578  | 0.00 | 0.00 |
| ATOM | 1718 | HG2  | GLU | 109 | 23.186 | 25.445 | 8.675  | 0.00 | 0.00 |
| ATOM | 1719 | HG3  | GLU | 109 | 23.358 | 25.328 | 8.612  | 0.00 | 0.00 |
| ATOM | 1720 | CD   | GLU | 109 | 23.503 | 24.302 | 8.019  | 0.00 | 0.00 |
| ATOM | 1721 | OE1  | GLU | 109 | 23.572 | 23.952 | 7.771  | 0.00 | 0.00 |
| ATOM | 1722 | OE2  | GLU | 109 | 23.587 | 23.927 | 7.822  | 0.00 | 0.00 |
| ATOM | 1723 | C    | GLU | 109 | 21.789 | 27.134 | 10.177 | 0.00 | 0.00 |
| ATOM | 1724 | O    | GLU | 109 | 21.232 | 27.862 | 9.506  | 0.00 | 0.00 |

|      |      |      |     |     |        |        |        |      |      |
|------|------|------|-----|-----|--------|--------|--------|------|------|
| ATOM | 1725 | N    | ASN | 110 | 21.248 | 26.711 | 11.221 | 0.00 | 0.00 |
| ATOM | 1726 | H    | ASN | 110 | 21.749 | 26.120 | 11.736 | 0.00 | 0.00 |
| ATOM | 1727 | CA   | ASN | 110 | 19.968 | 27.093 | 11.672 | 0.00 | 0.00 |
| ATOM | 1728 | HA   | ASN | 110 | 19.338 | 27.179 | 10.845 | 0.00 | 0.00 |
| ATOM | 1729 | CB   | ASN | 110 | 19.457 | 26.018 | 12.537 | 0.00 | 0.00 |
| ATOM | 1730 | HB2  | ASN | 110 | 19.529 | 25.163 | 12.122 | 0.00 | 0.00 |
| ATOM | 1731 | HB3  | ASN | 110 | 19.952 | 25.950 | 13.347 | 0.00 | 0.00 |
| ATOM | 1732 | CG   | ASN | 110 | 18.175 | 26.162 | 12.879 | 0.00 | 0.00 |
| ATOM | 1733 | OD1  | ASN | 110 | 17.885 | 26.581 | 13.633 | 0.00 | 0.00 |
| ATOM | 1734 | ND2  | ASN | 110 | 17.369 | 25.810 | 12.341 | 0.00 | 0.00 |
| ATOM | 1735 | 1HD2 | ASN | 110 | 16.532 | 25.893 | 12.567 | 0.00 | 0.00 |
| ATOM | 1736 | 2HD2 | ASN | 110 | 17.597 | 25.458 | 11.719 | 0.00 | 0.00 |
| ATOM | 1737 | C    | ASN | 110 | 19.952 | 28.425 | 12.340 | 0.00 | 0.00 |
| ATOM | 1738 | O    | ASN | 110 | 18.999 | 29.127 | 12.257 | 0.00 | 0.00 |
| ATOM | 1739 | N    | ALA | 111 | 21.015 | 28.811 | 12.947 | 0.00 | 0.00 |
| ATOM | 1740 | H    | ALA | 111 | 21.762 | 28.197 | 12.985 | 0.00 | 0.00 |
| ATOM | 1741 | CA   | ALA | 111 | 21.152 | 30.083 | 13.550 | 0.00 | 0.00 |
| ATOM | 1742 | HA   | ALA | 111 | 20.354 | 30.226 | 14.204 | 0.00 | 0.00 |
| ATOM | 1743 | CB   | ALA | 111 | 22.395 | 30.069 | 14.334 | 0.00 | 0.00 |
| ATOM | 1744 | HB1  | ALA | 111 | 22.680 | 30.061 | 14.551 | 0.00 | 0.00 |
| ATOM | 1745 | HB2  | ALA | 111 | 22.704 | 30.050 | 14.508 | 0.00 | 0.00 |
| ATOM | 1746 | HB3  | ALA | 111 | 22.698 | 30.098 | 14.521 | 0.00 | 0.00 |
| ATOM | 1747 | C    | ALA | 111 | 21.103 | 31.223 | 12.580 | 0.00 | 0.00 |
| ATOM | 1748 | O    | ALA | 111 | 20.521 | 32.227 | 12.856 | 0.00 | 0.00 |
| ATOM | 1749 | N    | TYR | 112 | 21.650 | 31.060 | 11.429 | 0.00 | 0.00 |
| ATOM | 1750 | H    | TYR | 112 | 22.129 | 30.229 | 11.273 | 0.00 | 0.00 |
| ATOM | 1751 | CA   | TYR | 112 | 21.593 | 32.031 | 10.383 | 0.00 | 0.00 |
| ATOM | 1752 | HA   | TYR | 112 | 21.865 | 32.975 | 10.776 | 0.00 | 0.00 |
| ATOM | 1753 | CB   | TYR | 112 | 22.575 | 31.657 | 9.309  | 0.00 | 0.00 |
| ATOM | 1754 | HB2  | TYR | 112 | 22.370 | 30.796 | 8.956  | 0.00 | 0.00 |
| ATOM | 1755 | HB3  | TYR | 112 | 22.476 | 32.257 | 8.575  | 0.00 | 0.00 |
| ATOM | 1756 | CG   | TYR | 112 | 23.924 | 31.625 | 9.562  | 0.00 | 0.00 |
| ATOM | 1757 | CD1  | TYR | 112 | 24.511 | 32.236 | 10.306 | 0.00 | 0.00 |
| ATOM | 1758 | HD1  | TYR | 112 | 24.009 | 32.731 | 10.728 | 0.00 | 0.00 |
| ATOM | 1759 | CE1  | TYR | 112 | 25.759 | 32.206 | 10.495 | 0.00 | 0.00 |
| ATOM | 1760 | HE1  | TYR | 112 | 26.209 | 32.673 | 11.055 | 0.00 | 0.00 |
| ATOM | 1761 | CZ   | TYR | 112 | 26.431 | 31.570 | 9.943  | 0.00 | 0.00 |
| ATOM | 1762 | OH   | TYR | 112 | 27.630 | 31.556 | 10.117 | 0.00 | 0.00 |
| ATOM | 1763 | HH   | TYR | 112 | 27.977 | 31.078 | 9.643  | 0.00 | 0.00 |
| ATOM | 1764 | CE2  | TYR | 112 | 25.851 | 30.957 | 9.200  | 0.00 | 0.00 |
| ATOM | 1765 | HE2  | TYR | 112 | 26.360 | 30.472 | 8.774  | 0.00 | 0.00 |
| ATOM | 1766 | CD2  | TYR | 112 | 24.603 | 30.988 | 9.012  | 0.00 | 0.00 |
| ATOM | 1767 | HD2  | TYR | 112 | 24.166 | 30.527 | 8.437  | 0.00 | 0.00 |
| ATOM | 1768 | C    | TYR | 112 | 20.204 | 32.189 | 9.812  | 0.00 | 0.00 |
| ATOM | 1769 | O    | TYR | 112 | 19.782 | 33.266 | 9.530  | 0.00 | 0.00 |
| ATOM | 1770 | N    | GLU | 113 | 19.465 | 31.137 | 9.685  | 0.00 | 0.00 |
| ATOM | 1771 | H    | GLU | 113 | 19.864 | 30.286 | 9.921  | 0.00 | 0.00 |
| ATOM | 1772 | CA   | GLU | 113 | 18.107 | 31.162 | 9.201  | 0.00 | 0.00 |
| ATOM | 1773 | HA   | GLU | 113 | 18.077 | 31.744 | 8.316  | 0.00 | 0.00 |
| ATOM | 1774 | CB   | GLU | 113 | 17.681 | 29.769 | 8.849  | 0.00 | 0.00 |
| ATOM | 1775 | HB2  | GLU | 113 | 18.160 | 29.304 | 8.588  | 0.00 | 0.00 |
| ATOM | 1776 | HB3  | GLU | 113 | 17.432 | 29.370 | 9.359  | 0.00 | 0.00 |
| ATOM | 1777 | CG   | GLU | 113 | 16.949 | 29.522 | 8.148  | 0.00 | 0.00 |
| ATOM | 1778 | HG2  | GLU | 113 | 16.654 | 29.751 | 8.439  | 0.00 | 0.00 |
| ATOM | 1779 | HG3  | GLU | 113 | 16.974 | 29.789 | 7.765  | 0.00 | 0.00 |
| ATOM | 1780 | CD   | GLU | 113 | 16.577 | 28.600 | 7.577  | 0.00 | 0.00 |
| ATOM | 1781 | OE1  | GLU | 113 | 16.451 | 28.209 | 7.354  | 0.00 | 0.00 |
| ATOM | 1782 | OE2  | GLU | 113 | 16.394 | 28.261 | 7.341  | 0.00 | 0.00 |
| ATOM | 1783 | C    | GLU | 113 | 17.144 | 31.814 | 10.178 | 0.00 | 0.00 |
| ATOM | 1784 | O    | GLU | 113 | 16.334 | 32.583 | 9.794  | 0.00 | 0.00 |
| ATOM | 1785 | N    | TYR | 114 | 17.261 | 31.567 | 11.444 | 0.00 | 0.00 |
| ATOM | 1786 | H    | TYR | 114 | 17.934 | 30.921 | 11.703 | 0.00 | 0.00 |
| ATOM | 1787 | CA   | TYR | 114 | 16.424 | 32.168 | 12.470 | 0.00 | 0.00 |
| ATOM | 1788 | HA   | TYR | 114 | 15.401 | 32.097 | 12.160 | 0.00 | 0.00 |
| ATOM | 1789 | CB   | TYR | 114 | 16.564 | 31.390 | 13.755 | 0.00 | 0.00 |
| ATOM | 1790 | HB2  | TYR | 114 | 16.436 | 30.372 | 13.550 | 0.00 | 0.00 |
| ATOM | 1791 | HB3  | TYR | 114 | 17.536 | 31.507 | 14.124 | 0.00 | 0.00 |
| ATOM | 1792 | CG   | TYR | 114 | 15.594 | 31.766 | 14.812 | 0.00 | 0.00 |
| ATOM | 1793 | CD1  | TYR | 114 | 14.339 | 31.337 | 14.756 | 0.00 | 0.00 |
| ATOM | 1794 | HD1  | TYR | 114 | 14.074 | 30.731 | 13.978 | 0.00 | 0.00 |
| ATOM | 1795 | CE1  | TYR | 114 | 13.425 | 31.703 | 15.708 | 0.00 | 0.00 |
| ATOM | 1796 | HE1  | TYR | 114 | 12.468 | 31.376 | 15.657 | 0.00 | 0.00 |
| ATOM | 1797 | CZ   | TYR | 114 | 13.764 | 32.501 | 16.726 | 0.00 | 0.00 |
| ATOM | 1798 | OH   | TYR | 114 | 12.883 | 32.868 | 17.635 | 0.00 | 0.00 |
| ATOM | 1799 | HH   | TYR | 114 | 12.078 | 32.583 | 17.449 | 0.00 | 0.00 |
| ATOM | 1800 | CE2  | TYR | 114 | 15.024 | 32.918 | 16.795 | 0.00 | 0.00 |
| ATOM | 1801 | HE2  | TYR | 114 | 15.274 | 33.523 | 17.576 | 0.00 | 0.00 |
| ATOM | 1802 | CD2  | TYR | 114 | 15.935 | 32.557 | 15.836 | 0.00 | 0.00 |
| ATOM | 1803 | HD2  | TYR | 114 | 16.889 | 32.894 | 15.880 | 0.00 | 0.00 |
| ATOM | 1804 | C    | TYR | 114 | 16.720 | 33.642 | 12.672 | 0.00 | 0.00 |
| ATOM | 1805 | O    | TYR | 114 | 15.811 | 34.440 | 12.760 | 0.00 | 0.00 |
| ATOM | 1806 | N    | PHE | 115 | 17.978 | 34.025 | 12.662 | 0.00 | 0.00 |
| ATOM | 1807 | H    | PHE | 115 | 18.677 | 33.328 | 12.583 | 0.00 | 0.00 |
| ATOM | 1808 | CA   | PHE | 115 | 18.389 | 35.409 | 12.734 | 0.00 | 0.00 |
| ATOM | 1809 | HA   | PHE | 115 | 18.006 | 35.835 | 13.642 | 0.00 | 0.00 |
| ATOM | 1810 | CB   | PHE | 115 | 19.904 | 35.469 | 12.770 | 0.00 | 0.00 |
| ATOM | 1811 | HB2  | PHE | 115 | 20.244 | 34.864 | 13.564 | 0.00 | 0.00 |
| ATOM | 1812 | HB3  | PHE | 115 | 20.295 | 35.045 | 11.880 | 0.00 | 0.00 |
| ATOM | 1813 | CG   | PHE | 115 | 20.492 | 36.823 | 12.947 | 0.00 | 0.00 |
| ATOM | 1814 | CD1  | PHE | 115 | 20.798 | 37.436 | 13.193 | 0.00 | 0.00 |
| ATOM | 1815 | HD1  | PHE | 115 | 20.598 | 36.963 | 13.257 | 0.00 | 0.00 |
| ATOM | 1816 | CE1  | PHE | 115 | 21.373 | 38.666 | 13.357 | 0.00 | 0.00 |
| ATOM | 1817 | HE1  | PHE | 115 | 21.603 | 39.127 | 13.545 | 0.00 | 0.00 |
| ATOM | 1818 | CZ   | PHE | 115 | 21.648 | 39.292 | 13.274 | 0.00 | 0.00 |
| ATOM | 1819 | HZ   | PHE | 115 | 22.089 | 40.231 | 13.399 | 0.00 | 0.00 |
| ATOM | 1820 | CE2  | PHE | 115 | 21.342 | 38.690 | 13.030 | 0.00 | 0.00 |
| ATOM | 1821 | HE2  | PHE | 115 | 21.548 | 39.169 | 12.967 | 0.00 | 0.00 |
| ATOM | 1822 | CD2  | PHE | 115 | 20.767 | 37.460 | 12.865 | 0.00 | 0.00 |
| ATOM | 1823 | HD2  | PHE | 115 | 20.541 | 37.006 | 12.676 | 0.00 | 0.00 |
| ATOM | 1824 | C    | PHE | 115 | 17.819 | 36.221 | 11.596 | 0.00 | 0.00 |
| ATOM | 1825 | O    | PHE | 115 | 17.259 | 37.268 | 11.820 | 0.00 | 0.00 |
| ATOM | 1826 | N    | THR | 116 | 17.879 | 35.711 | 10.387 | 0.00 | 0.00 |
| ATOM | 1827 | H    | THR | 116 | 18.324 | 34.839 | 10.267 | 0.00 | 0.00 |
| ATOM | 1828 | CA   | THR | 116 | 17.326 | 36.367 | 9.224  | 0.00 | 0.00 |
| ATOM | 1829 | HA   | THR | 116 | 17.716 | 37.351 | 9.184  | 0.00 | 0.00 |

|      |      |      |     |     |        |        |        |      |      |
|------|------|------|-----|-----|--------|--------|--------|------|------|
| ATOM | 1830 | CB   | THR | 116 | 17.738 | 35.661 | 7.952  | 0.00 | 0.00 |
| ATOM | 1831 | HB   | THR | 116 | 17.298 | 35.195 | 7.706  | 0.00 | 0.00 |
| ATOM | 1832 | CG2  | THR | 116 | 17.944 | 36.150 | 7.069  | 0.00 | 0.00 |
| ATOM | 1833 | 1HG2 | THR | 116 | 17.996 | 36.261 | 6.839  | 0.00 | 0.00 |
| ATOM | 1834 | 2HG2 | THR | 116 | 17.987 | 36.276 | 6.857  | 0.00 | 0.00 |
| ATOM | 1835 | 3HG2 | THR | 116 | 17.995 | 36.261 | 6.853  | 0.00 | 0.00 |
| ATOM | 1836 | OG1  | THR | 116 | 18.547 | 35.121 | 7.850  | 0.00 | 0.00 |
| ATOM | 1837 | HG1  | THR | 116 | 18.859 | 34.565 | 8.124  | 0.00 | 0.00 |
| ATOM | 1838 | C    | THR | 116 | 15.827 | 36.511 | 9.299  | 0.00 | 0.00 |
| ATOM | 1839 | O    | THR | 116 | 15.317 | 37.482 | 8.897  | 0.00 | 0.00 |
| ATOM | 1840 | N    | LYS | 117 | 15.114 | 35.598 | 9.863  | 0.00 | 0.00 |
| ATOM | 1841 | H    | LYS | 117 | 15.594 | 34.826 | 10.169 | 0.00 | 0.00 |
| ATOM | 1842 | CA   | LYS | 117 | 13.671 | 35.644 | 10.021 | 0.00 | 0.00 |
| ATOM | 1843 | HA   | LYS | 117 | 13.248 | 35.946 | 9.097  | 0.00 | 0.00 |
| ATOM | 1844 | CB   | LYS | 117 | 13.152 | 34.274 | 10.338 | 0.00 | 0.00 |
| ATOM | 1845 | HB2  | LYS | 117 | 13.627 | 33.803 | 10.690 | 0.00 | 0.00 |
| ATOM | 1846 | HB3  | LYS | 117 | 12.563 | 34.266 | 10.796 | 0.00 | 0.00 |
| ATOM | 1847 | CG   | LYS | 117 | 12.761 | 33.538 | 9.558  | 0.00 | 0.00 |
| ATOM | 1848 | HG2  | LYS | 117 | 12.344 | 33.793 | 9.273  | 0.00 | 0.00 |
| ATOM | 1849 | HG3  | LYS | 117 | 13.224 | 33.572 | 9.237  | 0.00 | 0.00 |
| ATOM | 1850 | CD   | LYS | 117 | 12.297 | 32.403 | 9.607  | 0.00 | 0.00 |
| ATOM | 1851 | HD2  | LYS | 117 | 12.581 | 32.145 | 10.042 | 0.00 | 0.00 |
| ATOM | 1852 | HD3  | LYS | 117 | 11.737 | 32.421 | 9.786  | 0.00 | 0.00 |
| ATOM | 1853 | CE   | LYS | 117 | 12.201 | 31.602 | 8.811  | 0.00 | 0.00 |
| ATOM | 1854 | HE2  | LYS | 117 | 11.986 | 31.700 | 8.514  | 0.00 | 0.00 |
| ATOM | 1855 | HE3  | LYS | 117 | 12.542 | 31.596 | 8.615  | 0.00 | 0.00 |
| ATOM | 1856 | NZ   | LYS | 117 | 11.946 | 30.717 | 8.692  | 0.00 | 0.00 |
| ATOM | 1857 | HZ1  | LYS | 117 | 11.899 | 30.491 | 8.686  | 0.00 | 0.00 |
| ATOM | 1858 | HZ2  | LYS | 117 | 11.857 | 30.510 | 8.671  | 0.00 | 0.00 |
| ATOM | 1859 | HZ3  | LYS | 117 | 11.894 | 30.492 | 8.628  | 0.00 | 0.00 |
| ATOM | 1860 | C    | LYS | 117 | 13.196 | 36.660 | 11.034 | 0.00 | 0.00 |
| ATOM | 1861 | O    | LYS | 117 | 12.256 | 37.296 | 10.815 | 0.00 | 0.00 |
| ATOM | 1862 | N    | ILE | 118 | 13.843 | 36.858 | 12.110 | 0.00 | 0.00 |
| ATOM | 1863 | H    | ILE | 118 | 14.595 | 36.282 | 12.249 | 0.00 | 0.00 |
| ATOM | 1864 | CA   | ILE | 118 | 13.443 | 37.829 | 13.130 | 0.00 | 0.00 |
| ATOM | 1865 | HA   | ILE | 118 | 12.395 | 37.984 | 13.029 | 0.00 | 0.00 |
| ATOM | 1866 | CB   | ILE | 118 | 13.631 | 37.305 | 14.537 | 0.00 | 0.00 |
| ATOM | 1867 | HB   | ILE | 118 | 13.202 | 37.994 | 15.171 | 0.00 | 0.00 |
| ATOM | 1868 | CG2  | ILE | 118 | 12.910 | 36.057 | 14.736 | 0.00 | 0.00 |
| ATOM | 1869 | 1HG2 | ILE | 118 | 12.706 | 35.768 | 14.760 | 0.00 | 0.00 |
| ATOM | 1870 | 2HG2 | ILE | 118 | 12.763 | 35.727 | 14.789 | 0.00 | 0.00 |
| ATOM | 1871 | 3HG2 | ILE | 118 | 12.718 | 35.762 | 14.823 | 0.00 | 0.00 |
| ATOM | 1872 | CG1  | ILE | 118 | 15.012 | 37.156 | 14.963 | 0.00 | 0.00 |
| ATOM | 1873 | 2HG1 | ILE | 118 | 15.402 | 36.422 | 14.631 | 0.00 | 0.00 |
| ATOM | 1874 | 3HG1 | ILE | 118 | 15.509 | 37.835 | 14.693 | 0.00 | 0.00 |
| ATOM | 1875 | CD1  | ILE | 118 | 15.243 | 37.096 | 16.214 | 0.00 | 0.00 |
| ATOM | 1876 | 1HD1 | ILE | 118 | 15.317 | 37.070 | 16.514 | 0.00 | 0.00 |
| ATOM | 1877 | 2HD1 | ILE | 118 | 15.308 | 37.097 | 16.520 | 0.00 | 0.00 |
| ATOM | 1878 | 3HD1 | ILE | 118 | 15.296 | 37.077 | 16.518 | 0.00 | 0.00 |
| ATOM | 1879 | C    | ILE | 118 | 14.034 | 39.208 | 12.940 | 0.00 | 0.00 |
| ATOM | 1880 | O    | ILE | 118 | 13.434 | 40.176 | 13.325 | 0.00 | 0.00 |
| ATOM | 1881 | N    | ALA | 119 | 15.163 | 39.328 | 12.302 | 0.00 | 0.00 |
| ATOM | 1882 | H    | ALA | 119 | 15.633 | 38.509 | 12.024 | 0.00 | 0.00 |
| ATOM | 1883 | CA   | ALA | 119 | 15.805 | 40.592 | 12.061 | 0.00 | 0.00 |
| ATOM | 1884 | HA   | ALA | 119 | 15.666 | 41.211 | 12.908 | 0.00 | 0.00 |
| ATOM | 1885 | CB   | ALA | 119 | 17.262 | 40.363 | 11.908 | 0.00 | 0.00 |
| ATOM | 1886 | HB1  | ALA | 119 | 17.598 | 40.275 | 11.748 | 0.00 | 0.00 |
| ATOM | 1887 | HB2  | ALA | 119 | 17.640 | 40.440 | 11.902 | 0.00 | 0.00 |
| ATOM | 1888 | HB3  | ALA | 119 | 17.609 | 40.221 | 11.970 | 0.00 | 0.00 |
| ATOM | 1889 | C    | ALA | 119 | 15.243 | 41.353 | 10.906 | 0.00 | 0.00 |
| ATOM | 1890 | O    | ALA | 119 | 15.360 | 42.516 | 10.857 | 0.00 | 0.00 |
| ATOM | 1891 | N    | THR | 120 | 14.591 | 40.730 | 9.996  | 0.00 | 0.00 |
| ATOM | 1892 | H    | THR | 120 | 14.537 | 39.780 | 10.063 | 0.00 | 0.00 |
| ATOM | 1893 | CA   | THR | 120 | 13.926 | 41.363 | 8.913  | 0.00 | 0.00 |
| ATOM | 1894 | HA   | THR | 120 | 14.561 | 42.062 | 8.529  | 0.00 | 0.00 |
| ATOM | 1895 | CB   | THR | 120 | 13.592 | 40.421 | 7.843  | 0.00 | 0.00 |
| ATOM | 1896 | HB   | THR | 120 | 13.007 | 40.410 | 7.553  | 0.00 | 0.00 |
| ATOM | 1897 | CG2  | THR | 120 | 14.028 | 40.344 | 7.020  | 0.00 | 0.00 |
| ATOM | 1898 | 1HG2 | THR | 120 | 14.108 | 40.324 | 6.811  | 0.00 | 0.00 |
| ATOM | 1899 | 2HG2 | THR | 120 | 14.135 | 40.345 | 6.828  | 0.00 | 0.00 |
| ATOM | 1900 | 3HG2 | THR | 120 | 14.147 | 40.307 | 6.807  | 0.00 | 0.00 |
| ATOM | 1901 | OG1  | THR | 120 | 13.630 | 39.591 | 7.930  | 0.00 | 0.00 |
| ATOM | 1902 | HG1  | THR | 120 | 13.781 | 39.077 | 7.933  | 0.00 | 0.00 |
| ATOM | 1903 | C    | THR | 120 | 12.728 | 42.089 | 9.311  | 0.00 | 0.00 |
| ATOM | 1904 | O    | THR | 120 | 12.465 | 43.070 | 8.839  | 0.00 | 0.00 |
| ATOM | 1905 | N    | SER | 121 | 12.042 | 41.661 | 10.230 | 0.00 | 0.00 |
| ATOM | 1906 | H    | SER | 121 | 12.288 | 40.840 | 10.555 | 0.00 | 0.00 |
| ATOM | 1907 | CA   | SER | 121 | 10.908 | 42.293 | 10.755 | 0.00 | 0.00 |
| ATOM | 1908 | HA   | SER | 121 | 10.361 | 42.681 | 9.974  | 0.00 | 0.00 |
| ATOM | 1909 | CB   | SER | 121 | 10.087 | 41.307 | 11.393 | 0.00 | 0.00 |
| ATOM | 1910 | HB2  | SER | 121 | 10.430 | 41.051 | 12.002 | 0.00 | 0.00 |
| ATOM | 1911 | HB3  | SER | 121 | 9.395  | 41.544 | 11.646 | 0.00 | 0.00 |
| ATOM | 1912 | OG   | SER | 121 | 9.765  | 40.416 | 10.882 | 0.00 | 0.00 |
| ATOM | 1913 | HG   | SER | 121 | 9.614  | 40.145 | 10.771 | 0.00 | 0.00 |
| ATOM | 1914 | C    | SER | 121 | 11.195 | 43.427 | 11.691 | 0.00 | 0.00 |
| ATOM | 1915 | O    | SER | 121 | 10.367 | 44.213 | 11.934 | 0.00 | 0.00 |
| ATOM | 1916 | N    | LEU | 122 | 12.371 | 43.552 | 12.189 | 0.00 | 0.00 |
| ATOM | 1917 | H    | LEU | 122 | 12.991 | 42.863 | 11.970 | 0.00 | 0.00 |
| ATOM | 1918 | CA   | LEU | 122 | 12.808 | 44.596 | 13.069 | 0.00 | 0.00 |
| ATOM | 1919 | HA   | LEU | 122 | 12.111 | 44.672 | 13.854 | 0.00 | 0.00 |
| ATOM | 1920 | CB   | LEU | 122 | 14.143 | 44.180 | 13.653 | 0.00 | 0.00 |
| ATOM | 1921 | HB2  | LEU | 122 | 14.058 | 43.290 | 14.059 | 0.00 | 0.00 |
| ATOM | 1922 | HB3  | LEU | 122 | 14.794 | 44.091 | 12.929 | 0.00 | 0.00 |
| ATOM | 1923 | CG   | LEU | 122 | 14.773 | 44.997 | 14.631 | 0.00 | 0.00 |
| ATOM | 1924 | HG   | LEU | 122 | 14.929 | 45.825 | 14.205 | 0.00 | 0.00 |
| ATOM | 1925 | CD1  | LEU | 122 | 14.093 | 45.189 | 15.763 | 0.00 | 0.00 |
| ATOM | 1926 | 1HD1 | LEU | 122 | 13.914 | 45.278 | 16.017 | 0.00 | 0.00 |
| ATOM | 1927 | 2HD1 | LEU | 122 | 13.968 | 45.245 | 16.049 | 0.00 | 0.00 |
| ATOM | 1928 | 3HD1 | LEU | 122 | 13.902 | 45.197 | 16.045 | 0.00 | 0.00 |
| ATOM | 1929 | CD2  | LEU | 122 | 15.948 | 44.488 | 15.083 | 0.00 | 0.00 |
| ATOM | 1930 | 1HD2 | LEU | 122 | 16.212 | 44.353 | 15.226 | 0.00 | 0.00 |
| ATOM | 1931 | 2HD2 | LEU | 122 | 16.244 | 44.353 | 15.147 | 0.00 | 0.00 |
| ATOM | 1932 | 3HD2 | LEU | 122 | 16.255 | 44.401 | 15.198 | 0.00 | 0.00 |
| ATOM | 1933 | C    | LEU | 122 | 12.862 | 45.946 | 12.402 | 0.00 | 0.00 |
| ATOM | 1934 | O    | LEU | 122 | 12.625 | 46.914 | 13.020 | 0.00 | 0.00 |

|      |      |      |     |     |        |        |        |      |      |
|------|------|------|-----|-----|--------|--------|--------|------|------|
| ATOM | 1935 | N    | PHE | 123 | 13.132 | 46.016 | 11.148 | 0.00 | 0.00 |
| ATOM | 1936 | H    | PHE | 123 | 13.312 | 45.185 | 10.705 | 0.00 | 0.00 |
| ATOM | 1937 | CA   | PHE | 123 | 13.297 | 47.234 | 10.398 | 0.00 | 0.00 |
| ATOM | 1938 | HA   | PHE | 123 | 13.267 | 48.050 | 11.070 | 0.00 | 0.00 |
| ATOM | 1939 | CB   | PHE | 123 | 14.659 | 47.240 | 9.777  | 0.00 | 0.00 |
| ATOM | 1940 | HB2  | PHE | 123 | 14.735 | 46.563 | 9.058  | 0.00 | 0.00 |
| ATOM | 1941 | HB3  | PHE | 123 | 14.813 | 48.104 | 9.340  | 0.00 | 0.00 |
| ATOM | 1942 | CG   | PHE | 123 | 15.718 | 47.032 | 10.643 | 0.00 | 0.00 |
| ATOM | 1943 | CD1  | PHE | 123 | 16.069 | 47.815 | 11.430 | 0.00 | 0.00 |
| ATOM | 1944 | HD1  | PHE | 123 | 15.586 | 48.559 | 11.416 | 0.00 | 0.00 |
| ATOM | 1945 | CE1  | PHE | 123 | 17.043 | 47.624 | 12.234 | 0.00 | 0.00 |
| ATOM | 1946 | HE1  | PHE | 123 | 17.315 | 48.227 | 12.828 | 0.00 | 0.00 |
| ATOM | 1947 | CZ   | PHE | 123 | 17.657 | 46.643 | 12.266 | 0.00 | 0.00 |
| ATOM | 1948 | HZ   | PHE | 123 | 18.393 | 46.494 | 12.888 | 0.00 | 0.00 |
| ATOM | 1949 | CE2  | PHE | 123 | 17.306 | 45.857 | 11.486 | 0.00 | 0.00 |
| ATOM | 1950 | HE2  | PHE | 123 | 17.768 | 45.102 | 11.510 | 0.00 | 0.00 |
| ATOM | 1951 | CD2  | PHE | 123 | 16.344 | 46.053 | 10.673 | 0.00 | 0.00 |
| ATOM | 1952 | HD2  | PHE | 123 | 16.080 | 45.450 | 10.076 | 0.00 | 0.00 |
| ATOM | 1953 | C    | PHE | 123 | 12.198 | 47.513 | 9.390  | 0.00 | 0.00 |
| ATOM | 1954 | O    | PHE | 123 | 12.229 | 48.478 | 8.712  | 0.00 | 0.00 |
| ATOM | 1955 | N    | GLU | 124 | 11.204 | 46.702 | 9.292  | 0.00 | 0.00 |
| ATOM | 1956 | H    | GLU | 124 | 11.231 | 45.929 | 9.859  | 0.00 | 0.00 |
| ATOM | 1957 | CA   | GLU | 124 | 10.112 | 46.842 | 8.352  | 0.00 | 0.00 |
| ATOM | 1958 | HA   | GLU | 124 | 10.512 | 46.970 | 7.410  | 0.00 | 0.00 |
| ATOM | 1959 | CB   | GLU | 124 | 9.311  | 45.607 | 8.331  | 0.00 | 0.00 |
| ATOM | 1960 | HB2  | GLU | 124 | 9.465  | 45.080 | 8.436  | 0.00 | 0.00 |
| ATOM | 1961 | HB3  | GLU | 124 | 8.918  | 45.533 | 8.627  | 0.00 | 0.00 |
| ATOM | 1962 | CG   | GLU | 124 | 8.832  | 45.154 | 7.761  | 0.00 | 0.00 |
| ATOM | 1963 | HG2  | GLU | 124 | 8.995  | 45.174 | 7.457  | 0.00 | 0.00 |
| ATOM | 1964 | HG3  | GLU | 124 | 8.679  | 45.405 | 7.840  | 0.00 | 0.00 |
| ATOM | 1965 | CD   | GLU | 124 | 8.332  | 44.323 | 7.506  | 0.00 | 0.00 |
| ATOM | 1966 | OE1  | GLU | 124 | 8.195  | 43.996 | 7.402  | 0.00 | 0.00 |
| ATOM | 1967 | OE2  | GLU | 124 | 8.067  | 43.988 | 7.405  | 0.00 | 0.00 |
| ATOM | 1968 | C    | GLU | 124 | 9.245  | 48.027 | 8.582  | 0.00 | 0.00 |
| ATOM | 1969 | O    | GLU | 124 | 8.715  | 48.566 | 7.689  | 0.00 | 0.00 |
| ATOM | 1970 | N    | SER | 125 | 9.141  | 48.471 | 9.765  | 0.00 | 0.00 |
| ATOM | 1971 | H    | SER | 125 | 9.569  | 47.960 | 10.452 | 0.00 | 0.00 |
| ATOM | 1972 | CA   | SER | 125 | 8.445  | 49.650 | 10.139 | 0.00 | 0.00 |
| ATOM | 1973 | HA   | SER | 125 | 7.798  | 49.907 | 9.370  | 0.00 | 0.00 |
| ATOM | 1974 | CB   | SER | 125 | 7.621  | 49.373 | 11.290 | 0.00 | 0.00 |
| ATOM | 1975 | HB2  | SER | 125 | 7.262  | 50.012 | 11.633 | 0.00 | 0.00 |
| ATOM | 1976 | HB3  | SER | 125 | 7.000  | 48.896 | 11.142 | 0.00 | 0.00 |
| ATOM | 1977 | OG   | SER | 125 | 8.086  | 48.909 | 12.100 | 0.00 | 0.00 |
| ATOM | 1978 | HG   | SER | 125 | 7.870  | 48.467 | 12.320 | 0.00 | 0.00 |
| ATOM | 1979 | C    | SER | 125 | 9.301  | 50.846 | 10.372 | 0.00 | 0.00 |
| ATOM | 1980 | O    | SER | 125 | 8.875  | 51.815 | 10.713 | 0.00 | 0.00 |
| ATOM | 1981 | N    | GLY | 126 | 10.506 | 50.796 | 10.190 | 0.00 | 0.00 |
| ATOM | 1982 | H    | GLY | 126 | 10.796 | 49.980 | 9.906  | 0.00 | 0.00 |
| ATOM | 1983 | CA   | GLY | 126 | 11.445 | 51.849 | 10.353 | 0.00 | 0.00 |
| ATOM | 1984 | HA2  | GLY | 126 | 11.688 | 52.189 | 9.435  | 0.00 | 0.00 |
| ATOM | 1985 | HA3  | GLY | 126 | 11.014 | 52.612 | 10.850 | 0.00 | 0.00 |
| ATOM | 1986 | C    | GLY | 126 | 12.711 | 51.517 | 11.064 | 0.00 | 0.00 |
| ATOM | 1987 | O    | GLY | 126 | 12.823 | 50.506 | 11.655 | 0.00 | 0.00 |
| ATOM | 1988 | N    | ILE | 127 | 13.673 | 52.383 | 11.018 | 0.00 | 0.00 |
| ATOM | 1989 | H    | ILE | 127 | 13.495 | 53.194 | 10.541 | 0.00 | 0.00 |
| ATOM | 1990 | CA   | ILE | 127 | 14.982 | 52.253 | 11.625 | 0.00 | 0.00 |
| ATOM | 1991 | HA   | ILE | 127 | 14.990 | 51.342 | 12.190 | 0.00 | 0.00 |
| ATOM | 1992 | CB   | ILE | 127 | 16.057 | 52.104 | 10.558 | 0.00 | 0.00 |
| ATOM | 1993 | HB   | ILE | 127 | 15.832 | 51.419 | 10.009 | 0.00 | 0.00 |
| ATOM | 1994 | CG2  | ILE | 127 | 16.204 | 53.116 | 9.775  | 0.00 | 0.00 |
| ATOM | 1995 | 1HG2 | ILE | 127 | 16.218 | 53.357 | 9.570  | 0.00 | 0.00 |
| ATOM | 1996 | 2HG2 | ILE | 127 | 16.263 | 53.383 | 9.592  | 0.00 | 0.00 |
| ATOM | 1997 | 3HG2 | ILE | 127 | 16.243 | 53.351 | 9.566  | 0.00 | 0.00 |
| ATOM | 1998 | CG1  | ILE | 127 | 17.287 | 51.782 | 10.972 | 0.00 | 0.00 |
| ATOM | 1999 | 2HG1 | ILE | 127 | 17.642 | 52.438 | 11.170 | 0.00 | 0.00 |
| ATOM | 2000 | 3HG1 | ILE | 127 | 17.224 | 51.349 | 11.622 | 0.00 | 0.00 |
| ATOM | 2001 | CD1  | ILE | 127 | 18.152 | 51.134 | 10.269 | 0.00 | 0.00 |
| ATOM | 2002 | 1HD1 | ILE | 127 | 18.357 | 50.975 | 10.105 | 0.00 | 0.00 |
| ATOM | 2003 | 2HD1 | ILE | 127 | 18.361 | 50.984 | 10.098 | 0.00 | 0.00 |
| ATOM | 2004 | 3HD1 | ILE | 127 | 18.382 | 50.968 | 10.106 | 0.00 | 0.00 |
| ATOM | 2005 | C    | ILE | 127 | 15.256 | 53.379 | 12.605 | 0.00 | 0.00 |
| ATOM | 2006 | O    | ILE | 127 | 14.982 | 54.527 | 12.341 | 0.00 | 0.00 |
| ATOM | 2007 | N    | ASN | 128 | 15.808 | 53.036 | 13.748 | 0.00 | 0.00 |
| ATOM | 2008 | H    | ASN | 128 | 16.023 | 52.084 | 13.885 | 0.00 | 0.00 |
| ATOM | 2009 | CA   | ASN | 128 | 16.308 | 53.942 | 14.765 | 0.00 | 0.00 |
| ATOM | 2010 | HA   | ASN | 128 | 16.677 | 54.831 | 14.284 | 0.00 | 0.00 |
| ATOM | 2011 | CB   | ASN | 128 | 15.163 | 54.350 | 15.689 | 0.00 | 0.00 |
| ATOM | 2012 | HB2  | ASN | 128 | 15.484 | 55.114 | 16.314 | 0.00 | 0.00 |
| ATOM | 2013 | HB3  | ASN | 128 | 14.393 | 54.745 | 15.117 | 0.00 | 0.00 |
| ATOM | 2014 | CG   | ASN | 128 | 14.602 | 53.298 | 16.562 | 0.00 | 0.00 |
| ATOM | 2015 | OD1  | ASN | 128 | 15.262 | 52.579 | 17.223 | 0.00 | 0.00 |
| ATOM | 2016 | ND2  | ASN | 128 | 13.371 | 53.184 | 16.599 | 0.00 | 0.00 |
| ATOM | 2017 | 1HD2 | ASN | 128 | 12.965 | 52.542 | 17.206 | 0.00 | 0.00 |
| ATOM | 2018 | 2HD2 | ASN | 128 | 12.829 | 53.772 | 16.062 | 0.00 | 0.00 |
| ATOM | 2019 | C    | ASN | 128 | 17.492 | 53.304 | 15.506 | 0.00 | 0.00 |
| ATOM | 2020 | O    | ASN | 128 | 17.732 | 52.113 | 15.377 | 0.00 | 0.00 |
| ATOM | 2021 | N    | TRP | 129 | 18.225 | 54.083 | 16.288 | 0.00 | 0.00 |
| ATOM | 2022 | H    | TRP | 129 | 17.975 | 55.041 | 16.359 | 0.00 | 0.00 |
| ATOM | 2023 | CA   | TRP | 129 | 19.416 | 53.630 | 17.002 | 0.00 | 0.00 |
| ATOM | 2024 | HA   | TRP | 129 | 20.119 | 53.245 | 16.283 | 0.00 | 0.00 |
| ATOM | 2025 | CB   | TRP | 129 | 20.057 | 54.815 | 17.703 | 0.00 | 0.00 |
| ATOM | 2026 | HB2  | TRP | 129 | 20.225 | 55.552 | 17.074 | 0.00 | 0.00 |
| ATOM | 2027 | HB3  | TRP | 129 | 19.446 | 55.176 | 18.368 | 0.00 | 0.00 |
| ATOM | 2028 | CG   | TRP | 129 | 21.255 | 54.618 | 18.348 | 0.00 | 0.00 |
| ATOM | 2029 | CD1  | TRP | 129 | 21.356 | 54.813 | 19.468 | 0.00 | 0.00 |
| ATOM | 2030 | HD1  | TRP | 129 | 20.586 | 55.133 | 20.027 | 0.00 | 0.00 |
| ATOM | 2031 | NE1  | TRP | 129 | 22.590 | 54.561 | 19.779 | 0.00 | 0.00 |
| ATOM | 2032 | HE1  | TRP | 129 | 22.884 | 54.670 | 20.573 | 0.00 | 0.00 |
| ATOM | 2033 | CE2  | TRP | 129 | 23.353 | 54.177 | 18.871 | 0.00 | 0.00 |
| ATOM | 2034 | CZ2  | TRP | 129 | 24.643 | 53.825 | 18.756 | 0.00 | 0.00 |
| ATOM | 2035 | HZ2  | TRP | 129 | 25.229 | 53.825 | 19.479 | 0.00 | 0.00 |
| ATOM | 2036 | CH2  | TRP | 129 | 25.152 | 53.475 | 17.689 | 0.00 | 0.00 |
| ATOM | 2037 | HH2  | TRP | 129 | 26.140 | 53.210 | 17.586 | 0.00 | 0.00 |
| ATOM | 2038 | CZ3  | TRP | 129 | 24.368 | 53.473 | 16.756 | 0.00 | 0.00 |
| ATOM | 2039 | HZ3  | TRP | 129 | 24.761 | 53.198 | 15.942 | 0.00 | 0.00 |

|      |      |      |     |     |        |        |        |      |      |
|------|------|------|-----|-----|--------|--------|--------|------|------|
| ATOM | 2040 | CE3  | TRP | 129 | 23.073 | 53.832 | 16.881 | 0.00 | 0.00 |
| ATOM | 2041 | HE3  | TRP | 129 | 22.484 | 53.832 | 16.162 | 0.00 | 0.00 |
| ATOM | 2042 | CD2  | TRP | 129 | 22.528 | 54.196 | 17.940 | 0.00 | 0.00 |
| ATOM | 2043 | C    | TRP | 129 | 19.139 | 52.499 | 17.986 | 0.00 | 0.00 |
| ATOM | 2044 | O    | TRP | 129 | 19.881 | 51.536 | 18.028 | 0.00 | 0.00 |
| ATOM | 2045 | N    | GLY | 130 | 18.044 | 52.556 | 18.726 | 0.00 | 0.00 |
| ATOM | 2046 | H    | GLY | 130 | 17.443 | 53.336 | 18.611 | 0.00 | 0.00 |
| ATOM | 2047 | CA   | GLY | 130 | 17.676 | 51.517 | 19.674 | 0.00 | 0.00 |
| ATOM | 2048 | HA2  | GLY | 130 | 18.462 | 51.405 | 20.393 | 0.00 | 0.00 |
| ATOM | 2049 | HA3  | GLY | 130 | 16.788 | 51.823 | 20.187 | 0.00 | 0.00 |
| ATOM | 2050 | C    | GLY | 130 | 17.413 | 50.157 | 19.043 | 0.00 | 0.00 |
| ATOM | 2051 | O    | GLY | 130 | 17.837 | 49.147 | 19.577 | 0.00 | 0.00 |
| ATOM | 2052 | N    | ARG | 131 | 16.809 | 50.114 | 17.859 | 0.00 | 0.00 |
| ATOM | 2053 | H    | ARG | 131 | 16.472 | 50.975 | 17.492 | 0.00 | 0.00 |
| ATOM | 2054 | CA   | ARG | 131 | 16.643 | 48.888 | 17.070 | 0.00 | 0.00 |
| ATOM | 2055 | HA   | ARG | 131 | 16.236 | 48.118 | 17.706 | 0.00 | 0.00 |
| ATOM | 2056 | CB   | ARG | 131 | 15.661 | 49.127 | 15.922 | 0.00 | 0.00 |
| ATOM | 2057 | HB2  | ARG | 131 | 15.983 | 49.969 | 15.353 | 0.00 | 0.00 |
| ATOM | 2058 | HB3  | ARG | 131 | 15.668 | 48.274 | 15.281 | 0.00 | 0.00 |
| ATOM | 2059 | CG   | ARG | 131 | 14.234 | 49.352 | 16.377 | 0.00 | 0.00 |
| ATOM | 2060 | HG2  | ARG | 131 | 13.880 | 48.484 | 16.860 | 0.00 | 0.00 |
| ATOM | 2061 | HG3  | ARG | 131 | 14.198 | 50.148 | 17.070 | 0.00 | 0.00 |
| ATOM | 2062 | CD   | ARG | 131 | 13.324 | 49.672 | 15.220 | 0.00 | 0.00 |
| ATOM | 2063 | HD2  | ARG | 131 | 13.739 | 50.459 | 14.668 | 0.00 | 0.00 |
| ATOM | 2064 | HD3  | ARG | 131 | 13.266 | 48.833 | 14.600 | 0.00 | 0.00 |
| ATOM | 2065 | NE   | ARG | 131 | 12.002 | 50.063 | 15.649 | 0.00 | 0.00 |
| ATOM | 2066 | HE   | ARG | 131 | 11.897 | 50.431 | 16.532 | 0.00 | 0.00 |
| ATOM | 2067 | CZ   | ARG | 131 | 10.939 | 50.102 | 14.979 | 0.00 | 0.00 |
| ATOM | 2068 | NH1  | ARG | 131 | 10.892 | 49.728 | 13.813 | 0.00 | 0.00 |
| ATOM | 2069 | 1HH1 | ARG | 131 | 11.688 | 49.414 | 13.372 | 0.00 | 0.00 |
| ATOM | 2070 | 2HH1 | ARG | 131 | 10.053 | 49.752 | 13.372 | 0.00 | 0.00 |
| ATOM | 2071 | NH2  | ARG | 131 | 9.869  | 50.524 | 15.494 | 0.00 | 0.00 |
| ATOM | 2072 | 1HH2 | ARG | 131 | 9.864  | 50.788 | 16.410 | 0.00 | 0.00 |
| ATOM | 2073 | 2HH2 | ARG | 131 | 9.069  | 50.606 | 14.988 | 0.00 | 0.00 |
| ATOM | 2074 | C    | ARG | 131 | 17.973 | 48.329 | 16.569 | 0.00 | 0.00 |
| ATOM | 2075 | O    | ARG | 131 | 18.130 | 47.127 | 16.519 | 0.00 | 0.00 |
| ATOM | 2076 | N    | VAL | 132 | 18.954 | 49.167 | 16.269 | 0.00 | 0.00 |
| ATOM | 2077 | H    | VAL | 132 | 18.765 | 50.137 | 16.342 | 0.00 | 0.00 |
| ATOM | 2078 | CA   | VAL | 132 | 20.316 | 48.730 | 15.931 | 0.00 | 0.00 |
| ATOM | 2079 | HA   | VAL | 132 | 20.243 | 47.925 | 15.217 | 0.00 | 0.00 |
| ATOM | 2080 | CB   | VAL | 132 | 21.124 | 49.851 | 15.268 | 0.00 | 0.00 |
| ATOM | 2081 | HB   | VAL | 132 | 21.174 | 50.682 | 15.921 | 0.00 | 0.00 |
| ATOM | 2082 | CG1  | VAL | 132 | 22.532 | 49.440 | 14.940 | 0.00 | 0.00 |
| ATOM | 2083 | 1HG1 | VAL | 132 | 22.885 | 49.360 | 14.885 | 0.00 | 0.00 |
| ATOM | 2084 | 2HG1 | VAL | 132 | 22.871 | 49.320 | 14.867 | 0.00 | 0.00 |
| ATOM | 2085 | 3HG1 | VAL | 132 | 22.881 | 49.358 | 14.838 | 0.00 | 0.00 |
| ATOM | 2086 | CG2  | VAL | 132 | 20.491 | 50.308 | 13.984 | 0.00 | 0.00 |
| ATOM | 2087 | 1HG2 | VAL | 132 | 20.324 | 50.423 | 13.678 | 0.00 | 0.00 |
| ATOM | 2088 | 2HG2 | VAL | 132 | 20.340 | 50.439 | 13.671 | 0.00 | 0.00 |
| ATOM | 2089 | 3HG2 | VAL | 132 | 20.342 | 50.417 | 13.666 | 0.00 | 0.00 |
| ATOM | 2090 | C    | VAL | 132 | 21.035 | 48.153 | 17.146 | 0.00 | 0.00 |
| ATOM | 2091 | O    | VAL | 132 | 21.642 | 47.103 | 17.041 | 0.00 | 0.00 |
| ATOM | 2092 | N    | VAL | 133 | 20.914 | 48.763 | 18.316 | 0.00 | 0.00 |
| ATOM | 2093 | H    | VAL | 133 | 20.431 | 49.632 | 18.342 | 0.00 | 0.00 |
| ATOM | 2094 | CA   | VAL | 133 | 21.489 | 48.240 | 19.560 | 0.00 | 0.00 |
| ATOM | 2095 | HA   | VAL | 133 | 22.517 | 47.995 | 19.375 | 0.00 | 0.00 |
| ATOM | 2096 | CB   | VAL | 133 | 21.474 | 49.294 | 20.655 | 0.00 | 0.00 |
| ATOM | 2097 | HB   | VAL | 133 | 20.615 | 49.580 | 20.802 | 0.00 | 0.00 |
| ATOM | 2098 | CG1  | VAL | 133 | 21.949 | 48.911 | 21.836 | 0.00 | 0.00 |
| ATOM | 2099 | 1HG1 | VAL | 133 | 21.990 | 48.820 | 22.156 | 0.00 | 0.00 |
| ATOM | 2100 | 2HG1 | VAL | 133 | 22.076 | 48.745 | 22.094 | 0.00 | 0.00 |
| ATOM | 2101 | 3HG1 | VAL | 133 | 22.114 | 48.895 | 22.136 | 0.00 | 0.00 |
| ATOM | 2102 | CG2  | VAL | 133 | 22.188 | 50.415 | 20.413 | 0.00 | 0.00 |
| ATOM | 2103 | 1HG2 | VAL | 133 | 22.374 | 50.686 | 20.349 | 0.00 | 0.00 |
| ATOM | 2104 | 2HG2 | VAL | 133 | 22.344 | 50.691 | 20.348 | 0.00 | 0.00 |
| ATOM | 2105 | 3HG2 | VAL | 133 | 22.363 | 50.706 | 20.367 | 0.00 | 0.00 |
| ATOM | 2106 | C    | VAL | 133 | 20.831 | 46.939 | 19.999 | 0.00 | 0.00 |
| ATOM | 2107 | O    | VAL | 133 | 21.518 | 46.048 | 20.466 | 0.00 | 0.00 |
| ATOM | 2108 | N    | ALA | 134 | 19.536 | 46.764 | 19.775 | 0.00 | 0.00 |
| ATOM | 2109 | H    | ALA | 134 | 19.003 | 47.537 | 19.446 | 0.00 | 0.00 |
| ATOM | 2110 | CA   | ALA | 134 | 18.853 | 45.503 | 20.015 | 0.00 | 0.00 |
| ATOM | 2111 | HA   | ALA | 134 | 19.064 | 45.193 | 21.022 | 0.00 | 0.00 |
| ATOM | 2112 | CB   | ALA | 134 | 17.355 | 45.724 | 19.898 | 0.00 | 0.00 |
| ATOM | 2113 | HB1  | ALA | 134 | 16.996 | 45.802 | 19.888 | 0.00 | 0.00 |
| ATOM | 2114 | HB2  | ALA | 134 | 16.992 | 45.770 | 19.844 | 0.00 | 0.00 |
| ATOM | 2115 | HB3  | ALA | 134 | 16.986 | 45.749 | 19.894 | 0.00 | 0.00 |
| ATOM | 2116 | C    | ALA | 134 | 19.341 | 44.375 | 19.101 | 0.00 | 0.00 |
| ATOM | 2117 | O    | ALA | 134 | 19.532 | 43.264 | 19.559 | 0.00 | 0.00 |
| ATOM | 2118 | N    | LEU | 135 | 19.617 | 44.657 | 17.837 | 0.00 | 0.00 |
| ATOM | 2119 | H    | LEU | 135 | 19.420 | 45.573 | 17.512 | 0.00 | 0.00 |
| ATOM | 2120 | CA   | LEU | 135 | 20.204 | 43.697 | 16.908 | 0.00 | 0.00 |
| ATOM | 2121 | HA   | LEU | 135 | 19.614 | 42.802 | 16.946 | 0.00 | 0.00 |
| ATOM | 2122 | CB   | LEU | 135 | 20.134 | 44.270 | 15.501 | 0.00 | 0.00 |
| ATOM | 2123 | HB2  | LEU | 135 | 19.136 | 44.567 | 15.294 | 0.00 | 0.00 |
| ATOM | 2124 | HB3  | LEU | 135 | 20.724 | 45.142 | 15.461 | 0.00 | 0.00 |
| ATOM | 2125 | CG   | LEU | 135 | 20.595 | 43.337 | 14.413 | 0.00 | 0.00 |
| ATOM | 2126 | HG   | LEU | 135 | 21.481 | 43.031 | 14.588 | 0.00 | 0.00 |
| ATOM | 2127 | CD1  | LEU | 135 | 19.839 | 42.231 | 14.231 | 0.00 | 0.00 |
| ATOM | 2128 | 1HD1 | LEU | 135 | 19.627 | 41.995 | 14.180 | 0.00 | 0.00 |
| ATOM | 2129 | 2HD1 | LEU | 135 | 19.687 | 41.934 | 14.161 | 0.00 | 0.00 |
| ATOM | 2130 | 3HD1 | LEU | 135 | 19.664 | 41.942 | 14.215 | 0.00 | 0.00 |
| ATOM | 2131 | CD2  | LEU | 135 | 20.634 | 43.931 | 13.190 | 0.00 | 0.00 |
| ATOM | 2132 | 1HD2 | LEU | 135 | 20.650 | 44.052 | 12.890 | 0.00 | 0.00 |
| ATOM | 2133 | 2HD2 | LEU | 135 | 20.625 | 44.089 | 12.902 | 0.00 | 0.00 |
| ATOM | 2134 | 3HD2 | LEU | 135 | 20.671 | 44.080 | 12.889 | 0.00 | 0.00 |
| ATOM | 2135 | C    | LEU | 135 | 21.627 | 43.301 | 17.298 | 0.00 | 0.00 |
| ATOM | 2136 | O    | LEU | 135 | 21.980 | 42.138 | 17.214 | 0.00 | 0.00 |
| ATOM | 2137 | N    | LEU | 136 | 22.431 | 44.242 | 17.772 | 0.00 | 0.00 |
| ATOM | 2138 | H    | LEU | 136 | 22.090 | 45.175 | 17.787 | 0.00 | 0.00 |
| ATOM | 2139 | CA   | LEU | 136 | 23.774 | 43.982 | 18.281 | 0.00 | 0.00 |
| ATOM | 2140 | HA   | LEU | 136 | 24.305 | 43.393 | 17.556 | 0.00 | 0.00 |
| ATOM | 2141 | CB   | LEU | 136 | 24.502 | 45.308 | 18.468 | 0.00 | 0.00 |
| ATOM | 2142 | HB2  | LEU | 136 | 24.067 | 45.951 | 18.437 | 0.00 | 0.00 |
| ATOM | 2143 | HB3  | LEU | 136 | 24.821 | 45.391 | 19.155 | 0.00 | 0.00 |
| ATOM | 2144 | CG   | LEU | 136 | 25.386 | 45.697 | 17.821 | 0.00 | 0.00 |



|      |      |      |     |     |        |        |        |      |      |
|------|------|------|-----|-----|--------|--------|--------|------|------|
| ATOM | 2145 | HG   | LEU | 136 | 25.112 | 45.470 | 17.784 | 0.00 | 0.00 |
| ATOM | 2146 | CD1  | LEU | 136 | 25.929 | 46.231 | 17.433 | 0.00 | 0.00 |
| ATOM | 2147 | 1HD1 | LEU | 136 | 26.037 | 46.361 | 17.311 | 0.00 | 0.00 |
| ATOM | 2148 | 2HD1 | LEU | 136 | 26.091 | 46.342 | 17.358 | 0.00 | 0.00 |
| ATOM | 2149 | 3HD1 | LEU | 136 | 26.053 | 46.382 | 17.349 | 0.00 | 0.00 |
| ATOM | 2150 | CD2  | LEU | 136 | 26.142 | 45.919 | 17.606 | 0.00 | 0.00 |
| ATOM | 2151 | 1HD2 | LEU | 136 | 26.340 | 45.977 | 17.549 | 0.00 | 0.00 |
| ATOM | 2152 | 2HD2 | LEU | 136 | 26.295 | 45.965 | 17.577 | 0.00 | 0.00 |
| ATOM | 2153 | 3HD2 | LEU | 136 | 26.342 | 45.976 | 17.538 | 0.00 | 0.00 |
| ATOM | 2154 | C    | LEU | 136 | 23.756 | 43.159 | 19.565 | 0.00 | 0.00 |
| ATOM | 2155 | O    | LEU | 136 | 24.551 | 42.252 | 19.707 | 0.00 | 0.00 |
| ATOM | 2156 | N    | GLY | 137 | 22.815 | 43.416 | 20.462 | 0.00 | 0.00 |
| ATOM | 2157 | H    | GLY | 137 | 22.225 | 44.196 | 20.298 | 0.00 | 0.00 |
| ATOM | 2158 | CA   | GLY | 137 | 22.608 | 42.655 | 21.683 | 0.00 | 0.00 |
| ATOM | 2159 | HA2  | GLY | 137 | 23.509 | 42.656 | 22.261 | 0.00 | 0.00 |
| ATOM | 2160 | HA3  | GLY | 137 | 21.838 | 43.132 | 22.252 | 0.00 | 0.00 |
| ATOM | 2161 | C    | GLY | 137 | 22.194 | 41.213 | 21.441 | 0.00 | 0.00 |
| ATOM | 2162 | O    | GLY | 137 | 22.755 | 40.312 | 22.034 | 0.00 | 0.00 |
| ATOM | 2163 | N    | PHE | 138 | 21.287 | 40.972 | 20.507 | 0.00 | 0.00 |
| ATOM | 2164 | H    | PHE | 138 | 20.831 | 41.745 | 20.087 | 0.00 | 0.00 |
| ATOM | 2165 | CA   | PHE | 138 | 20.947 | 39.629 | 20.055 | 0.00 | 0.00 |
| ATOM | 2166 | HA   | PHE | 138 | 20.737 | 39.029 | 20.924 | 0.00 | 0.00 |
| ATOM | 2167 | CB   | PHE | 138 | 19.691 | 39.673 | 19.199 | 0.00 | 0.00 |
| ATOM | 2168 | HB2  | PHE | 138 | 18.913 | 40.147 | 19.751 | 0.00 | 0.00 |
| ATOM | 2169 | HB3  | PHE | 138 | 19.876 | 40.274 | 18.345 | 0.00 | 0.00 |
| ATOM | 2170 | CG   | PHE | 138 | 19.191 | 38.345 | 18.747 | 0.00 | 0.00 |
| ATOM | 2171 | CD1  | PHE | 138 | 18.906 | 37.642 | 18.848 | 0.00 | 0.00 |
| ATOM | 2172 | HD1  | PHE | 138 | 19.026 | 38.041 | 19.245 | 0.00 | 0.00 |
| ATOM | 2173 | CE1  | PHE | 138 | 18.470 | 36.414 | 18.433 | 0.00 | 0.00 |
| ATOM | 2174 | HE1  | PHE | 138 | 18.257 | 35.884 | 18.511 | 0.00 | 0.00 |
| ATOM | 2175 | CZ   | PHE | 138 | 18.308 | 35.880 | 17.917 | 0.00 | 0.00 |
| ATOM | 2176 | HZ   | PHE | 138 | 17.971 | 34.942 | 17.602 | 0.00 | 0.00 |
| ATOM | 2177 | CE2  | PHE | 138 | 18.579 | 36.577 | 17.816 | 0.00 | 0.00 |
| ATOM | 2178 | HE2  | PHE | 138 | 18.448 | 36.171 | 17.423 | 0.00 | 0.00 |
| ATOM | 2179 | CD2  | PHE | 138 | 19.017 | 37.805 | 18.230 | 0.00 | 0.00 |
| ATOM | 2180 | HD2  | PHE | 138 | 19.223 | 38.331 | 18.151 | 0.00 | 0.00 |
| ATOM | 2181 | C    | PHE | 138 | 22.112 | 38.962 | 19.320 | 0.00 | 0.00 |
| ATOM | 2182 | O    | PHE | 138 | 22.398 | 37.805 | 19.560 | 0.00 | 0.00 |
| ATOM | 2183 | N    | GLY | 139 | 22.841 | 39.699 | 18.491 | 0.00 | 0.00 |
| ATOM | 2184 | H    | GLY | 139 | 22.542 | 40.631 | 18.320 | 0.00 | 0.00 |
| ATOM | 2185 | CA   | GLY | 139 | 24.035 | 39.235 | 17.799 | 0.00 | 0.00 |
| ATOM | 2186 | HA2  | GLY | 139 | 23.776 | 38.427 | 17.143 | 0.00 | 0.00 |
| ATOM | 2187 | HA3  | GLY | 139 | 24.418 | 40.044 | 17.209 | 0.00 | 0.00 |
| ATOM | 2188 | C    | GLY | 139 | 25.145 | 38.762 | 18.729 | 0.00 | 0.00 |
| ATOM | 2189 | O    | GLY | 139 | 25.749 | 37.739 | 18.468 | 0.00 | 0.00 |
| ATOM | 2190 | N    | TYR | 140 | 25.370 | 39.440 | 19.848 | 0.00 | 0.00 |
| ATOM | 2191 | H    | TYR | 140 | 24.873 | 40.291 | 19.983 | 0.00 | 0.00 |
| ATOM | 2192 | CA   | TYR | 140 | 26.290 | 39.003 | 20.895 | 0.00 | 0.00 |
| ATOM | 2193 | HA   | TYR | 140 | 27.259 | 38.830 | 20.453 | 0.00 | 0.00 |
| ATOM | 2194 | CB   | TYR | 140 | 26.440 | 40.100 | 21.945 | 0.00 | 0.00 |
| ATOM | 2195 | HB2  | TYR | 140 | 26.992 | 40.906 | 21.510 | 0.00 | 0.00 |
| ATOM | 2196 | HB3  | TYR | 140 | 25.472 | 40.478 | 22.195 | 0.00 | 0.00 |
| ATOM | 2197 | CG   | TYR | 140 | 27.134 | 39.685 | 23.217 | 0.00 | 0.00 |
| ATOM | 2198 | CD1  | TYR | 140 | 28.446 | 39.289 | 23.202 | 0.00 | 0.00 |
| ATOM | 2199 | HD1  | TYR | 140 | 28.955 | 39.288 | 22.293 | 0.00 | 0.00 |
| ATOM | 2200 | CE1  | TYR | 140 | 29.087 | 38.878 | 24.367 | 0.00 | 0.00 |
| ATOM | 2201 | HE1  | TYR | 140 | 30.088 | 38.573 | 24.358 | 0.00 | 0.00 |
| ATOM | 2202 | CZ   | TYR | 140 | 28.412 | 38.856 | 25.559 | 0.00 | 0.00 |
| ATOM | 2203 | OH   | TYR | 140 | 29.033 | 38.459 | 26.679 | 0.00 | 0.00 |
| ATOM | 2204 | HH   | TYR | 140 | 28.474 | 38.440 | 27.416 | 0.00 | 0.00 |
| ATOM | 2205 | CE2  | TYR | 140 | 27.098 | 39.257 | 25.579 | 0.00 | 0.00 |
| ATOM | 2206 | HE2  | TYR | 140 | 26.590 | 39.259 | 26.493 | 0.00 | 0.00 |
| ATOM | 2207 | CD2  | TYR | 140 | 26.463 | 39.670 | 24.412 | 0.00 | 0.00 |
| ATOM | 2208 | HD2  | TYR | 140 | 25.463 | 39.978 | 24.436 | 0.00 | 0.00 |
| ATOM | 2209 | C    | TYR | 140 | 25.854 | 37.686 | 21.530 | 0.00 | 0.00 |
| ATOM | 2210 | O    | TYR | 140 | 26.649 | 36.768 | 21.630 | 0.00 | 0.00 |
| ATOM | 2211 | N    | ARG | 141 | 24.587 | 37.551 | 21.903 | 0.00 | 0.00 |
| ATOM | 2212 | H    | ARG | 141 | 23.981 | 38.327 | 21.770 | 0.00 | 0.00 |
| ATOM | 2213 | CA   | ARG | 141 | 24.057 | 36.324 | 22.502 | 0.00 | 0.00 |
| ATOM | 2214 | HA   | ARG | 141 | 24.731 | 36.013 | 23.285 | 0.00 | 0.00 |
| ATOM | 2215 | CB   | ARG | 141 | 22.684 | 36.587 | 23.115 | 0.00 | 0.00 |
| ATOM | 2216 | HB2  | ARG | 141 | 22.038 | 37.002 | 22.372 | 0.00 | 0.00 |
| ATOM | 2217 | HB3  | ARG | 141 | 22.263 | 35.655 | 23.425 | 0.00 | 0.00 |
| ATOM | 2218 | CG   | ARG | 141 | 22.700 | 37.514 | 24.317 | 0.00 | 0.00 |
| ATOM | 2219 | HG2  | ARG | 141 | 23.162 | 38.375 | 24.090 | 0.00 | 0.00 |
| ATOM | 2220 | HG3  | ARG | 141 | 21.756 | 37.744 | 24.570 | 0.00 | 0.00 |
| ATOM | 2221 | CD   | ARG | 141 | 23.330 | 36.981 | 25.494 | 0.00 | 0.00 |
| ATOM | 2222 | HD2  | ARG | 141 | 22.861 | 36.154 | 25.725 | 0.00 | 0.00 |
| ATOM | 2223 | HD3  | ARG | 141 | 24.253 | 36.751 | 25.256 | 0.00 | 0.00 |
| ATOM | 2224 | NE   | ARG | 141 | 23.338 | 37.857 | 26.626 | 0.00 | 0.00 |
| ATOM | 2225 | HE   | ARG | 141 | 22.721 | 38.576 | 26.657 | 0.00 | 0.00 |
| ATOM | 2226 | CZ   | ARG | 141 | 24.140 | 37.859 | 27.582 | 0.00 | 0.00 |
| ATOM | 2227 | NH1  | ARG | 141 | 25.012 | 37.004 | 27.707 | 0.00 | 0.00 |
| ATOM | 2228 | 1HH1 | ARG | 141 | 25.026 | 36.220 | 27.157 | 0.00 | 0.00 |
| ATOM | 2229 | 2HH1 | ARG | 141 | 25.636 | 37.125 | 28.405 | 0.00 | 0.00 |
| ATOM | 2230 | NH2  | ARG | 141 | 24.089 | 38.752 | 28.454 | 0.00 | 0.00 |
| ATOM | 2231 | 1HH2 | ARG | 141 | 23.385 | 39.381 | 28.454 | 0.00 | 0.00 |
| ATOM | 2232 | 2HH2 | ARG | 141 | 24.702 | 38.736 | 29.173 | 0.00 | 0.00 |
| ATOM | 2233 | C    | ARG | 141 | 24.047 | 35.153 | 21.532 | 0.00 | 0.00 |
| ATOM | 2234 | O    | ARG | 141 | 24.342 | 34.050 | 21.940 | 0.00 | 0.00 |
| ATOM | 2235 | N    | LEU | 142 | 23.811 | 35.384 | 20.253 | 0.00 | 0.00 |
| ATOM | 2236 | H    | LEU | 142 | 23.530 | 36.302 | 20.003 | 0.00 | 0.00 |
| ATOM | 2237 | CA   | LEU | 142 | 23.951 | 34.393 | 19.197 | 0.00 | 0.00 |
| ATOM | 2238 | HA   | LEU | 142 | 23.371 | 33.529 | 19.467 | 0.00 | 0.00 |
| ATOM | 2239 | CB   | LEU | 142 | 23.378 | 34.976 | 17.907 | 0.00 | 0.00 |
| ATOM | 2240 | HB2  | LEU | 142 | 22.401 | 35.285 | 18.088 | 0.00 | 0.00 |
| ATOM | 2241 | HB3  | LEU | 142 | 23.914 | 35.831 | 17.648 | 0.00 | 0.00 |
| ATOM | 2242 | CG   | LEU | 142 | 23.358 | 34.085 | 16.719 | 0.00 | 0.00 |
| ATOM | 2243 | HG   | LEU | 142 | 23.876 | 33.820 | 16.603 | 0.00 | 0.00 |
| ATOM | 2244 | CD1  | LEU | 142 | 22.806 | 33.320 | 16.524 | 0.00 | 0.00 |
| ATOM | 2245 | 1HD1 | LEU | 142 | 22.657 | 33.115 | 16.466 | 0.00 | 0.00 |
| ATOM | 2246 | 2HD1 | LEU | 142 | 22.676 | 33.136 | 16.454 | 0.00 | 0.00 |
| ATOM | 2247 | 3HD1 | LEU | 142 | 22.686 | 33.140 | 16.499 | 0.00 | 0.00 |
| ATOM | 2248 | CD2  | LEU | 142 | 23.158 | 34.337 | 15.800 | 0.00 | 0.00 |
| ATOM | 2249 | 1HD2 | LEU | 142 | 23.099 | 34.417 | 15.581 | 0.00 | 0.00 |

|      |      |      |     |     |        |        |        |      |      |
|------|------|------|-----|-----|--------|--------|--------|------|------|
| ATOM | 2250 | ZHD2 | LEU | 142 | 23.143 | 34.396 | 15.545 | 0.00 | 0.00 |
| ATOM | 2251 | 3HD2 | LEU | 142 | 23.091 | 34.378 | 15.595 | 0.00 | 0.00 |
| ATOM | 2252 | C    | LEU | 142 | 25.397 | 33.928 | 19.045 | 0.00 | 0.00 |
| ATOM | 2253 | O    | LEU | 142 | 25.654 | 32.743 | 19.043 | 0.00 | 0.00 |
| ATOM | 2254 | N    | ALA | 143 | 26.345 | 34.845 | 18.985 | 0.00 | 0.00 |
| ATOM | 2255 | H    | ALA | 143 | 26.075 | 35.799 | 18.991 | 0.00 | 0.00 |
| ATOM | 2256 | CA   | ALA | 143 | 27.758 | 34.539 | 18.882 | 0.00 | 0.00 |
| ATOM | 2257 | HA   | ALA | 143 | 27.908 | 33.907 | 18.027 | 0.00 | 0.00 |
| ATOM | 2258 | CB   | ALA | 143 | 28.512 | 35.831 | 18.651 | 0.00 | 0.00 |
| ATOM | 2259 | HB1  | ALA | 143 | 28.702 | 36.140 | 18.591 | 0.00 | 0.00 |
| ATOM | 2260 | HB2  | ALA | 143 | 28.695 | 36.145 | 18.590 | 0.00 | 0.00 |
| ATOM | 2261 | HB3  | ALA | 143 | 28.699 | 36.144 | 18.598 | 0.00 | 0.00 |
| ATOM | 2262 | C    | ALA | 143 | 28.284 | 33.777 | 20.094 | 0.00 | 0.00 |
| ATOM | 2263 | O    | ALA | 143 | 28.986 | 32.800 | 19.943 | 0.00 | 0.00 |
| ATOM | 2264 | N    | LEU | 144 | 27.891 | 34.163 | 21.292 | 0.00 | 0.00 |
| ATOM | 2265 | H    | LEU | 144 | 27.347 | 34.988 | 21.359 | 0.00 | 0.00 |
| ATOM | 2266 | CA   | LEU | 144 | 28.260 | 33.482 | 22.516 | 0.00 | 0.00 |
| ATOM | 2267 | HA   | LEU | 144 | 29.321 | 33.348 | 22.504 | 0.00 | 0.00 |
| ATOM | 2268 | CB   | LEU | 144 | 27.900 | 34.364 | 23.696 | 0.00 | 0.00 |
| ATOM | 2269 | HB2  | LEU | 144 | 27.973 | 35.249 | 23.520 | 0.00 | 0.00 |
| ATOM | 2270 | HB3  | LEU | 144 | 27.049 | 34.254 | 23.909 | 0.00 | 0.00 |
| ATOM | 2271 | CG   | LEU | 144 | 28.546 | 34.241 | 24.836 | 0.00 | 0.00 |
| ATOM | 2272 | HG   | LEU | 144 | 28.321 | 33.583 | 24.959 | 0.00 | 0.00 |
| ATOM | 2273 | CD1  | LEU | 144 | 29.715 | 34.336 | 25.058 | 0.00 | 0.00 |
| ATOM | 2274 | 1HD1 | LEU | 144 | 29.995 | 34.365 | 25.121 | 0.00 | 0.00 |
| ATOM | 2275 | 2HD1 | LEU | 144 | 30.001 | 34.354 | 25.124 | 0.00 | 0.00 |
| ATOM | 2276 | 3HD1 | LEU | 144 | 30.003 | 34.350 | 25.105 | 0.00 | 0.00 |
| ATOM | 2277 | CD2  | LEU | 144 | 28.314 | 34.943 | 25.658 | 0.00 | 0.00 |
| ATOM | 2278 | 1HD2 | LEU | 144 | 28.280 | 35.107 | 25.862 | 0.00 | 0.00 |
| ATOM | 2279 | 2HD2 | LEU | 144 | 28.229 | 35.087 | 25.871 | 0.00 | 0.00 |
| ATOM | 2280 | 3HD2 | LEU | 144 | 28.258 | 35.137 | 25.844 | 0.00 | 0.00 |
| ATOM | 2281 | C    | LEU | 144 | 27.650 | 32.089 | 22.614 | 0.00 | 0.00 |
| ATOM | 2282 | O    | LEU | 144 | 28.314 | 31.176 | 23.049 | 0.00 | 0.00 |
| ATOM | 2283 | N    | HIP | 145 | 26.437 | 31.886 | 22.141 | 0.00 | 0.00 |
| ATOM | 2284 | H    | HIP | 145 | 25.935 | 32.671 | 21.812 | 0.00 | 0.00 |
| ATOM | 2285 | CA   | HIP | 145 | 25.786 | 30.585 | 22.133 | 0.00 | 0.00 |
| ATOM | 2286 | HA   | HIP | 145 | 25.811 | 30.203 | 23.128 | 0.00 | 0.00 |
| ATOM | 2287 | CB   | HIP | 145 | 24.340 | 30.749 | 21.733 | 0.00 | 0.00 |
| ATOM | 2288 | HB2  | HIP | 145 | 23.926 | 31.513 | 22.235 | 0.00 | 0.00 |
| ATOM | 2289 | HB3  | HIP | 145 | 24.267 | 30.983 | 20.769 | 0.00 | 0.00 |
| ATOM | 2290 | CG   | HIP | 145 | 23.507 | 29.639 | 21.965 | 0.00 | 0.00 |
| ATOM | 2291 | ND1  | HIP | 145 | 23.079 | 28.979 | 22.177 | 0.00 | 0.00 |
| ATOM | 2292 | HD1  | HIP | 145 | 23.287 | 29.130 | 22.205 | 0.00 | 0.00 |
| ATOM | 2293 | CE1  | HIP | 145 | 22.338 | 28.091 | 22.348 | 0.00 | 0.00 |
| ATOM | 2294 | HE1  | HIP | 145 | 21.866 | 27.432 | 22.536 | 0.00 | 0.00 |
| ATOM | 2295 | NE2  | HIP | 145 | 22.284 | 28.167 | 22.250 | 0.00 | 0.00 |
| ATOM | 2296 | HE2  | HIP | 145 | 21.794 | 27.622 | 22.341 | 0.00 | 0.00 |
| ATOM | 2297 | CD2  | HIP | 145 | 23.010 | 29.132 | 22.008 | 0.00 | 0.00 |
| ATOM | 2298 | HD2  | HIP | 145 | 23.154 | 29.433 | 21.882 | 0.00 | 0.00 |
| ATOM | 2299 | C    | HIP | 145 | 26.502 | 29.560 | 21.278 | 0.00 | 0.00 |
| ATOM | 2300 | O    | HIP | 145 | 26.613 | 28.435 | 21.670 | 0.00 | 0.00 |
| ATOM | 2301 | N    | VAL | 146 | 27.043 | 29.941 | 20.153 | 0.00 | 0.00 |
| ATOM | 2302 | H    | VAL | 146 | 26.902 | 30.870 | 19.878 | 0.00 | 0.00 |
| ATOM | 2303 | CA   | VAL | 146 | 27.855 | 29.060 | 19.322 | 0.00 | 0.00 |
| ATOM | 2304 | HA   | VAL | 146 | 27.395 | 28.099 | 19.311 | 0.00 | 0.00 |
| ATOM | 2305 | CB   | VAL | 146 | 27.902 | 29.525 | 17.890 | 0.00 | 0.00 |
| ATOM | 2306 | HB   | VAL | 146 | 28.374 | 29.449 | 17.636 | 0.00 | 0.00 |
| ATOM | 2307 | CG1  | VAL | 146 | 27.430 | 29.250 | 17.142 | 0.00 | 0.00 |
| ATOM | 2308 | 1HG1 | VAL | 146 | 27.295 | 29.193 | 16.947 | 0.00 | 0.00 |
| ATOM | 2309 | 2HG1 | VAL | 146 | 27.336 | 29.203 | 16.922 | 0.00 | 0.00 |
| ATOM | 2310 | 3HG1 | VAL | 146 | 27.321 | 29.152 | 16.993 | 0.00 | 0.00 |
| ATOM | 2311 | CG2  | VAL | 146 | 27.766 | 30.334 | 17.448 | 0.00 | 0.00 |
| ATOM | 2312 | 1HG2 | VAL | 146 | 27.729 | 30.547 | 17.337 | 0.00 | 0.00 |
| ATOM | 2313 | 2HG2 | VAL | 146 | 27.744 | 30.527 | 17.333 | 0.00 | 0.00 |
| ATOM | 2314 | 3HG2 | VAL | 146 | 27.727 | 30.522 | 17.329 | 0.00 | 0.00 |
| ATOM | 2315 | C    | VAL | 146 | 29.233 | 28.837 | 19.900 | 0.00 | 0.00 |
| ATOM | 2316 | O    | VAL | 146 | 29.708 | 27.730 | 19.918 | 0.00 | 0.00 |
| ATOM | 2317 | N    | TYR | 147 | 29.840 | 29.849 | 20.470 | 0.00 | 0.00 |
| ATOM | 2318 | H    | TYR | 147 | 29.409 | 30.732 | 20.419 | 0.00 | 0.00 |
| ATOM | 2319 | CA   | TYR | 147 | 31.115 | 29.760 | 21.146 | 0.00 | 0.00 |
| ATOM | 2320 | HA   | TYR | 147 | 31.835 | 29.370 | 20.462 | 0.00 | 0.00 |
| ATOM | 2321 | CB   | TYR | 147 | 31.540 | 31.160 | 21.542 | 0.00 | 0.00 |
| ATOM | 2322 | HB2  | TYR | 147 | 31.537 | 31.755 | 20.722 | 0.00 | 0.00 |
| ATOM | 2323 | HB3  | TYR | 147 | 30.861 | 31.563 | 22.178 | 0.00 | 0.00 |
| ATOM | 2324 | CG   | TYR | 147 | 32.825 | 31.309 | 22.152 | 0.00 | 0.00 |
| ATOM | 2325 | CD1  | TYR | 147 | 33.076 | 31.318 | 23.342 | 0.00 | 0.00 |
| ATOM | 2326 | HD1  | TYR | 147 | 32.361 | 31.207 | 23.826 | 0.00 | 0.00 |
| ATOM | 2327 | CE1  | TYR | 147 | 34.263 | 31.469 | 23.903 | 0.00 | 0.00 |
| ATOM | 2328 | HE1  | TYR | 147 | 34.454 | 31.470 | 24.810 | 0.00 | 0.00 |
| ATOM | 2329 | CZ   | TYR | 147 | 35.203 | 31.619 | 23.276 | 0.00 | 0.00 |
| ATOM | 2330 | OH   | TYR | 147 | 36.345 | 31.761 | 23.803 | 0.00 | 0.00 |
| ATOM | 2331 | HH   | TYR | 147 | 36.562 | 31.783 | 24.529 | 0.00 | 0.00 |
| ATOM | 2332 | CE2  | TYR | 147 | 34.952 | 31.623 | 22.089 | 0.00 | 0.00 |
| ATOM | 2333 | HE2  | TYR | 147 | 35.674 | 31.743 | 21.618 | 0.00 | 0.00 |
| ATOM | 2334 | CD2  | TYR | 147 | 33.766 | 31.466 | 21.529 | 0.00 | 0.00 |
| ATOM | 2335 | HD2  | TYR | 147 | 33.579 | 31.465 | 20.622 | 0.00 | 0.00 |
| ATOM | 2336 | C    | TYR | 147 | 31.080 | 28.819 | 22.333 | 0.00 | 0.00 |
| ATOM | 2337 | O    | TYR | 147 | 31.945 | 28.028 | 22.505 | 0.00 | 0.00 |
| ATOM | 2338 | N    | GLN | 148 | 30.043 | 28.834 | 23.108 | 0.00 | 0.00 |
| ATOM | 2339 | H    | GLN | 148 | 29.383 | 29.525 | 22.936 | 0.00 | 0.00 |
| ATOM | 2340 | CA   | GLN | 148 | 29.823 | 27.950 | 24.232 | 0.00 | 0.00 |
| ATOM | 2341 | HA   | GLN | 148 | 30.669 | 27.912 | 24.805 | 0.00 | 0.00 |
| ATOM | 2342 | CB   | GLN | 148 | 28.766 | 28.478 | 25.073 | 0.00 | 0.00 |
| ATOM | 2343 | HB2  | GLN | 148 | 28.081 | 28.765 | 24.589 | 0.00 | 0.00 |
| ATOM | 2344 | HB3  | GLN | 148 | 28.447 | 27.844 | 25.645 | 0.00 | 0.00 |
| ATOM | 2345 | CG   | GLN | 148 | 29.060 | 29.455 | 25.825 | 0.00 | 0.00 |
| ATOM | 2346 | HG2  | GLN | 148 | 29.636 | 29.178 | 26.310 | 0.00 | 0.00 |
| ATOM | 2347 | HG3  | GLN | 148 | 29.395 | 30.053 | 25.352 | 0.00 | 0.00 |
| ATOM | 2348 | CD   | GLN | 148 | 28.149 | 30.017 | 26.582 | 0.00 | 0.00 |
| ATOM | 2349 | OE1  | GLN | 148 | 27.277 | 29.992 | 26.433 | 0.00 | 0.00 |
| ATOM | 2350 | NE2  | GLN | 148 | 28.316 | 30.550 | 27.424 | 0.00 | 0.00 |
| ATOM | 2351 | 1HE2 | GLN | 148 | 27.725 | 30.907 | 27.927 | 0.00 | 0.00 |
| ATOM | 2352 | 2HE2 | GLN | 148 | 29.024 | 30.565 | 27.579 | 0.00 | 0.00 |
| ATOM | 2353 | C    | GLN | 148 | 29.549 | 26.557 | 23.874 | 0.00 | 0.00 |
| ATOM | 2354 | O    | GLN | 148 | 29.657 | 25.723 | 24.661 | 0.00 | 0.00 |

|      |      |      |     |     |        |        |        |      |      |
|------|------|------|-----|-----|--------|--------|--------|------|------|
| ATOM | 2355 | N    | HIP | 149 | 29.245 | 26.284 | 22.681 | 0.00 | 0.00 |
| ATOM | 2356 | H    | HIP | 149 | 29.150 | 27.016 | 22.094 | 0.00 | 0.00 |
| ATOM | 2357 | CA   | HIP | 149 | 29.098 | 24.995 | 22.156 | 0.00 | 0.00 |
| ATOM | 2358 | HA   | HIP | 149 | 28.972 | 24.340 | 22.938 | 0.00 | 0.00 |
| ATOM | 2359 | CB   | HIP | 149 | 27.889 | 24.946 | 21.392 | 0.00 | 0.00 |
| ATOM | 2360 | HB2  | HIP | 149 | 27.444 | 25.599 | 21.350 | 0.00 | 0.00 |
| ATOM | 2361 | HB3  | HIP | 149 | 27.990 | 24.800 | 20.673 | 0.00 | 0.00 |
| ATOM | 2362 | CG   | HIP | 149 | 27.108 | 24.230 | 21.635 | 0.00 | 0.00 |
| ATOM | 2363 | ND1  | HIP | 149 | 26.619 | 23.808 | 22.057 | 0.00 | 0.00 |
| ATOM | 2364 | HD1  | HIP | 149 | 26.718 | 23.924 | 22.254 | 0.00 | 0.00 |
| ATOM | 2365 | CE1  | HIP | 149 | 26.000 | 23.211 | 22.168 | 0.00 | 0.00 |
| ATOM | 2366 | HE1  | HIP | 149 | 25.531 | 22.778 | 22.484 | 0.00 | 0.00 |
| ATOM | 2367 | NE2  | HIP | 149 | 26.080 | 23.243 | 21.827 | 0.00 | 0.00 |
| ATOM | 2368 | HE2  | HIP | 149 | 25.713 | 22.866 | 21.829 | 0.00 | 0.00 |
| ATOM | 2369 | CD2  | HIP | 149 | 26.769 | 23.878 | 21.491 | 0.00 | 0.00 |
| ATOM | 2370 | HD2  | HIP | 149 | 27.007 | 24.062 | 21.183 | 0.00 | 0.00 |
| ATOM | 2371 | C    | HIP | 149 | 30.285 | 24.509 | 21.420 | 0.00 | 0.00 |
| ATOM | 2372 | O    | HIP | 149 | 30.228 | 23.703 | 20.678 | 0.00 | 0.00 |
| ATOM | 2373 | N    | GLY | 150 | 31.369 | 25.007 | 21.608 | 0.00 | 0.00 |
| ATOM | 2374 | H    | GLY | 150 | 31.353 | 25.663 | 22.224 | 0.00 | 0.00 |
| ATOM | 2375 | CA   | GLY | 150 | 32.598 | 24.605 | 21.047 | 0.00 | 0.00 |
| ATOM | 2376 | HA2  | GLY | 150 | 33.272 | 24.880 | 21.635 | 0.00 | 0.00 |
| ATOM | 2377 | HA3  | GLY | 150 | 32.626 | 23.666 | 21.005 | 0.00 | 0.00 |
| ATOM | 2378 | C    | GLY | 150 | 33.013 | 25.050 | 19.746 | 0.00 | 0.00 |
| ATOM | 2379 | O    | GLY | 150 | 33.960 | 24.688 | 19.322 | 0.00 | 0.00 |
| ATOM | 2380 | N    | LEU | 151 | 32.333 | 25.836 | 19.110 | 0.00 | 0.00 |
| ATOM | 2381 | H    | LEU | 151 | 31.583 | 26.121 | 19.525 | 0.00 | 0.00 |
| ATOM | 2382 | CA   | LEU | 151 | 32.590 | 26.316 | 17.840 | 0.00 | 0.00 |
| ATOM | 2383 | HA   | LEU | 151 | 33.234 | 25.661 | 17.384 | 0.00 | 0.00 |
| ATOM | 2384 | CB   | LEU | 151 | 31.370 | 26.300 | 17.088 | 0.00 | 0.00 |
| ATOM | 2385 | HB2  | LEU | 151 | 30.771 | 26.583 | 17.503 | 0.00 | 0.00 |
| ATOM | 2386 | HB3  | LEU | 151 | 31.373 | 26.782 | 16.439 | 0.00 | 0.00 |
| ATOM | 2387 | CG   | LEU | 151 | 30.914 | 25.309 | 16.624 | 0.00 | 0.00 |
| ATOM | 2388 | HG   | LEU | 151 | 30.934 | 25.173 | 17.138 | 0.00 | 0.00 |
| ATOM | 2389 | CD1  | LEU | 151 | 30.171 | 25.109 | 16.137 | 0.00 | 0.00 |
| ATOM | 2390 | 1HD1 | LEU | 151 | 29.990 | 25.048 | 15.987 | 0.00 | 0.00 |
| ATOM | 2391 | 2HD1 | LEU | 151 | 29.980 | 25.015 | 16.025 | 0.00 | 0.00 |
| ATOM | 2392 | 3HD1 | LEU | 151 | 30.003 | 25.112 | 16.049 | 0.00 | 0.00 |
| ATOM | 2393 | CD2  | LEU | 151 | 31.111 | 24.689 | 15.910 | 0.00 | 0.00 |
| ATOM | 2394 | 1HD2 | LEU | 151 | 31.197 | 24.539 | 15.766 | 0.00 | 0.00 |
| ATOM | 2395 | 2HD2 | LEU | 151 | 31.145 | 24.528 | 15.780 | 0.00 | 0.00 |
| ATOM | 2396 | 3HD2 | LEU | 151 | 31.134 | 24.539 | 15.667 | 0.00 | 0.00 |
| ATOM | 2397 | C    | LEU | 151 | 33.269 | 27.635 | 17.851 | 0.00 | 0.00 |
| ATOM | 2398 | O    | LEU | 151 | 32.806 | 28.580 | 17.342 | 0.00 | 0.00 |
| ATOM | 2399 | N    | THR | 152 | 34.378 | 27.712 | 18.462 | 0.00 | 0.00 |
| ATOM | 2400 | H    | THR | 152 | 34.719 | 26.908 | 18.845 | 0.00 | 0.00 |
| ATOM | 2401 | CA   | THR | 152 | 35.113 | 28.903 | 18.675 | 0.00 | 0.00 |
| ATOM | 2402 | HA   | THR | 152 | 34.463 | 29.621 | 19.078 | 0.00 | 0.00 |
| ATOM | 2403 | CB   | THR | 152 | 36.187 | 28.690 | 19.646 | 0.00 | 0.00 |
| ATOM | 2404 | HB   | THR | 152 | 36.771 | 29.165 | 19.642 | 0.00 | 0.00 |
| ATOM | 2405 | CG2  | THR | 152 | 35.945 | 28.734 | 20.667 | 0.00 | 0.00 |
| ATOM | 2406 | 1HG2 | THR | 152 | 35.891 | 28.760 | 20.911 | 0.00 | 0.00 |
| ATOM | 2407 | 2HG2 | THR | 152 | 35.876 | 28.751 | 20.927 | 0.00 | 0.00 |
| ATOM | 2408 | 3HG2 | THR | 152 | 35.906 | 28.733 | 20.918 | 0.00 | 0.00 |
| ATOM | 2409 | OG1  | THR | 152 | 36.696 | 27.822 | 19.649 | 0.00 | 0.00 |
| ATOM | 2410 | HG1  | THR | 152 | 37.316 | 27.725 | 20.084 | 0.00 | 0.00 |
| ATOM | 2411 | C    | THR | 152 | 35.666 | 29.475 | 17.445 | 0.00 | 0.00 |
| ATOM | 2412 | O    | THR | 152 | 35.742 | 30.618 | 17.317 | 0.00 | 0.00 |
| ATOM | 2413 | N    | GLY | 153 | 35.980 | 28.705 | 16.503 | 0.00 | 0.00 |
| ATOM | 2414 | H    | GLY | 153 | 35.906 | 27.782 | 16.672 | 0.00 | 0.00 |
| ATOM | 2415 | CA   | GLY | 153 | 36.405 | 29.115 | 15.233 | 0.00 | 0.00 |
| ATOM | 2416 | HA2  | GLY | 153 | 37.151 | 29.820 | 15.329 | 0.00 | 0.00 |
| ATOM | 2417 | HA3  | GLY | 153 | 36.793 | 28.285 | 14.751 | 0.00 | 0.00 |
| ATOM | 2418 | C    | GLY | 153 | 35.364 | 29.697 | 14.376 | 0.00 | 0.00 |
| ATOM | 2419 | O    | GLY | 153 | 35.641 | 30.290 | 13.450 | 0.00 | 0.00 |
| ATOM | 2420 | N    | PHE | 154 | 34.167 | 29.568 | 14.695 | 0.00 | 0.00 |
| ATOM | 2421 | H    | PHE | 154 | 34.004 | 29.060 | 15.462 | 0.00 | 0.00 |
| ATOM | 2422 | CA   | PHE | 154 | 33.064 | 30.075 | 13.978 | 0.00 | 0.00 |
| ATOM | 2423 | HA   | PHE | 154 | 33.300 | 30.087 | 12.971 | 0.00 | 0.00 |
| ATOM | 2424 | CB   | PHE | 154 | 31.958 | 29.133 | 14.160 | 0.00 | 0.00 |
| ATOM | 2425 | HB2  | PHE | 154 | 32.178 | 28.363 | 14.363 | 0.00 | 0.00 |
| ATOM | 2426 | HB3  | PHE | 154 | 31.501 | 29.344 | 14.770 | 0.00 | 0.00 |
| ATOM | 2427 | CG   | PHE | 154 | 31.158 | 28.889 | 13.299 | 0.00 | 0.00 |
| ATOM | 2428 | CD1  | PHE | 154 | 30.751 | 28.809 | 12.915 | 0.00 | 0.00 |
| ATOM | 2429 | HD1  | PHE | 154 | 31.013 | 28.936 | 13.224 | 0.00 | 0.00 |
| ATOM | 2430 | CE1  | PHE | 154 | 30.005 | 28.567 | 12.126 | 0.00 | 0.00 |
| ATOM | 2431 | HE1  | PHE | 154 | 29.697 | 28.512 | 11.835 | 0.00 | 0.00 |
| ATOM | 2432 | CZ   | PHE | 154 | 29.660 | 28.398 | 11.718 | 0.00 | 0.00 |
| ATOM | 2433 | HZ   | PHE | 154 | 29.090 | 28.215 | 11.114 | 0.00 | 0.00 |
| ATOM | 2434 | CE2  | PHE | 154 | 30.061 | 28.471 | 12.097 | 0.00 | 0.00 |
| ATOM | 2435 | HE2  | PHE | 154 | 29.797 | 28.341 | 11.784 | 0.00 | 0.00 |
| ATOM | 2436 | CD2  | PHE | 154 | 30.808 | 28.715 | 12.885 | 0.00 | 0.00 |
| ATOM | 2437 | HD2  | PHE | 154 | 31.111 | 28.767 | 13.173 | 0.00 | 0.00 |
| ATOM | 2438 | C    | PHE | 154 | 32.698 | 31.488 | 14.320 | 0.00 | 0.00 |
| ATOM | 2439 | O    | PHE | 154 | 31.932 | 32.095 | 13.623 | 0.00 | 0.00 |
| ATOM | 2440 | N    | LEU | 155 | 33.263 | 32.054 | 15.355 | 0.00 | 0.00 |
| ATOM | 2441 | H    | LEU | 155 | 33.891 | 31.522 | 15.880 | 0.00 | 0.00 |
| ATOM | 2442 | CA   | LEU | 155 | 32.997 | 33.398 | 15.776 | 0.00 | 0.00 |
| ATOM | 2443 | HA   | LEU | 155 | 31.961 | 33.472 | 15.965 | 0.00 | 0.00 |
| ATOM | 2444 | CB   | LEU | 155 | 33.729 | 33.645 | 17.072 | 0.00 | 0.00 |
| ATOM | 2445 | HB2  | LEU | 155 | 33.685 | 32.970 | 17.601 | 0.00 | 0.00 |
| ATOM | 2446 | HB3  | LEU | 155 | 34.564 | 33.758 | 16.942 | 0.00 | 0.00 |
| ATOM | 2447 | CG   | LEU | 155 | 33.454 | 34.608 | 17.862 | 0.00 | 0.00 |
| ATOM | 2448 | HG   | LEU | 155 | 33.584 | 35.000 | 17.409 | 0.00 | 0.00 |
| ATOM | 2449 | CD1  | LEU | 155 | 32.639 | 34.849 | 18.414 | 0.00 | 0.00 |
| ATOM | 2450 | 1HD1 | LEU | 155 | 32.465 | 34.931 | 18.536 | 0.00 | 0.00 |
| ATOM | 2451 | 2HD1 | LEU | 155 | 32.421 | 34.915 | 18.520 | 0.00 | 0.00 |
| ATOM | 2452 | 3HD1 | LEU | 155 | 32.437 | 34.891 | 18.586 | 0.00 | 0.00 |
| ATOM | 2453 | CD2  | LEU | 155 | 33.848 | 34.825 | 18.785 | 0.00 | 0.00 |
| ATOM | 2454 | 1HD2 | LEU | 155 | 33.952 | 34.886 | 18.987 | 0.00 | 0.00 |
| ATOM | 2455 | 2HD2 | LEU | 155 | 33.923 | 34.872 | 19.037 | 0.00 | 0.00 |
| ATOM | 2456 | 3HD2 | LEU | 155 | 33.963 | 34.881 | 19.004 | 0.00 | 0.00 |
| ATOM | 2457 | C    | LEU | 155 | 33.321 | 34.421 | 14.706 | 0.00 | 0.00 |
| ATOM | 2458 | O    | LEU | 155 | 32.600 | 35.366 | 14.543 | 0.00 | 0.00 |
| ATOM | 2459 | N    | GLY | 156 | 34.347 | 34.211 | 13.923 | 0.00 | 0.00 |

|      |      |      |     |     |        |        |        |      |      |
|------|------|------|-----|-----|--------|--------|--------|------|------|
| ATOM | 2460 | H    | GLY | 156 | 34.911 | 33.439 | 14.113 | 0.00 | 0.00 |
| ATOM | 2461 | CA   | GLY | 156 | 34.664 | 35.014 | 12.767 | 0.00 | 0.00 |
| ATOM | 2462 | HA2  | GLY | 156 | 34.765 | 36.024 | 13.062 | 0.00 | 0.00 |
| ATOM | 2463 | HA3  | GLY | 156 | 35.592 | 34.688 | 12.376 | 0.00 | 0.00 |
| ATOM | 2464 | C    | GLY | 156 | 33.641 | 34.930 | 11.657 | 0.00 | 0.00 |
| ATOM | 2465 | O    | GLY | 156 | 33.314 | 35.906 | 11.064 | 0.00 | 0.00 |
| ATOM | 2466 | N    | GLN | 157 | 33.065 | 33.795 | 11.422 | 0.00 | 0.00 |
| ATOM | 2467 | H    | GLN | 157 | 33.359 | 33.040 | 11.952 | 0.00 | 0.00 |
| ATOM | 2468 | CA   | GLN | 157 | 32.022 | 33.591 | 10.435 | 0.00 | 0.00 |
| ATOM | 2469 | HA   | GLN | 157 | 32.310 | 34.082 | 9.533  | 0.00 | 0.00 |
| ATOM | 2470 | CB   | GLN | 157 | 31.876 | 32.124 | 10.127 | 0.00 | 0.00 |
| ATOM | 2471 | HB2  | GLN | 157 | 31.885 | 31.627 | 10.761 | 0.00 | 0.00 |
| ATOM | 2472 | HB3  | GLN | 157 | 31.177 | 31.926 | 9.781  | 0.00 | 0.00 |
| ATOM | 2473 | CG   | GLN | 157 | 32.619 | 31.565 | 9.411  | 0.00 | 0.00 |
| ATOM | 2474 | HG2  | GLN | 157 | 32.804 | 31.644 | 9.323  | 0.00 | 0.00 |
| ATOM | 2475 | HG3  | GLN | 157 | 32.825 | 31.416 | 9.374  | 0.00 | 0.00 |
| ATOM | 2476 | CD   | GLN | 157 | 32.842 | 31.065 | 8.850  | 0.00 | 0.00 |
| ATOM | 2477 | OE1  | GLN | 157 | 32.722 | 31.026 | 8.811  | 0.00 | 0.00 |
| ATOM | 2478 | NE2  | GLN | 157 | 33.178 | 30.665 | 8.393  | 0.00 | 0.00 |
| ATOM | 2479 | 1HE2 | GLN | 157 | 33.322 | 30.337 | 8.028  | 0.00 | 0.00 |
| ATOM | 2480 | 2HE2 | GLN | 157 | 33.289 | 30.684 | 8.406  | 0.00 | 0.00 |
| ATOM | 2481 | C    | GLN | 157 | 30.700 | 34.203 | 10.850 | 0.00 | 0.00 |
| ATOM | 2482 | O    | GLN | 157 | 30.038 | 34.802 | 10.032 | 0.00 | 0.00 |
| ATOM | 2483 | N    | VAL | 158 | 30.342 | 34.146 | 12.119 | 0.00 | 0.00 |
| ATOM | 2484 | H    | VAL | 158 | 30.893 | 33.598 | 12.729 | 0.00 | 0.00 |
| ATOM | 2485 | CA   | VAL | 158 | 29.172 | 34.835 | 12.650 | 0.00 | 0.00 |
| ATOM | 2486 | HA   | VAL | 158 | 28.341 | 34.614 | 12.013 | 0.00 | 0.00 |
| ATOM | 2487 | CB   | VAL | 158 | 28.813 | 34.350 | 14.038 | 0.00 | 0.00 |
| ATOM | 2488 | HB   | VAL | 158 | 29.347 | 34.237 | 14.434 | 0.00 | 0.00 |
| ATOM | 2489 | CG1  | VAL | 158 | 28.218 | 34.850 | 14.746 | 0.00 | 0.00 |
| ATOM | 2490 | 1HG1 | VAL | 158 | 28.109 | 34.954 | 14.952 | 0.00 | 0.00 |
| ATOM | 2491 | 2HG1 | VAL | 158 | 28.085 | 35.008 | 14.896 | 0.00 | 0.00 |
| ATOM | 2492 | 3HG1 | VAL | 158 | 28.027 | 34.945 | 14.920 | 0.00 | 0.00 |
| ATOM | 2493 | CG2  | VAL | 158 | 28.282 | 33.464 | 14.241 | 0.00 | 0.00 |
| ATOM | 2494 | 1HG2 | VAL | 158 | 28.152 | 33.233 | 14.271 | 0.00 | 0.00 |
| ATOM | 2495 | 2HG2 | VAL | 158 | 28.174 | 33.234 | 14.302 | 0.00 | 0.00 |
| ATOM | 2496 | 3HG2 | VAL | 158 | 28.138 | 33.264 | 14.304 | 0.00 | 0.00 |
| ATOM | 2497 | C    | VAL | 158 | 29.344 | 36.333 | 12.609 | 0.00 | 0.00 |
| ATOM | 2498 | O    | VAL | 158 | 28.421 | 37.029 | 12.254 | 0.00 | 0.00 |
| ATOM | 2499 | N    | THR | 159 | 30.534 | 36.839 | 12.875 | 0.00 | 0.00 |
| ATOM | 2500 | H    | THR | 159 | 31.245 | 36.225 | 13.178 | 0.00 | 0.00 |
| ATOM | 2501 | CA   | THR | 159 | 30.856 | 38.248 | 12.726 | 0.00 | 0.00 |
| ATOM | 2502 | HA   | THR | 159 | 30.177 | 38.819 | 13.323 | 0.00 | 0.00 |
| ATOM | 2503 | CB   | THR | 159 | 32.262 | 38.541 | 13.211 | 0.00 | 0.00 |
| ATOM | 2504 | HB   | THR | 159 | 32.928 | 38.048 | 12.667 | 0.00 | 0.00 |
| ATOM | 2505 | CG2  | THR | 159 | 32.605 | 39.891 | 13.164 | 0.00 | 0.00 |
| ATOM | 2506 | 1HG2 | THR | 159 | 32.701 | 40.215 | 13.155 | 0.00 | 0.00 |
| ATOM | 2507 | 2HG2 | THR | 159 | 32.701 | 40.214 | 13.138 | 0.00 | 0.00 |
| ATOM | 2508 | 3HG2 | THR | 159 | 32.684 | 40.222 | 13.156 | 0.00 | 0.00 |
| ATOM | 2509 | OG1  | THR | 159 | 32.465 | 38.183 | 14.455 | 0.00 | 0.00 |
| ATOM | 2510 | HG1  | THR | 159 | 32.555 | 37.311 | 14.538 | 0.00 | 0.00 |
| ATOM | 2511 | C    | THR | 159 | 30.675 | 38.706 | 11.295 | 0.00 | 0.00 |
| ATOM | 2512 | O    | THR | 159 | 30.039 | 39.704 | 11.060 | 0.00 | 0.00 |
| ATOM | 2513 | N    | ARG | 160 | 31.149 | 37.950 | 10.323 | 0.00 | 0.00 |
| ATOM | 2514 | H    | ARG | 160 | 31.664 | 37.151 | 10.580 | 0.00 | 0.00 |
| ATOM | 2515 | CA   | ARG | 160 | 30.972 | 38.237 | 8.906  | 0.00 | 0.00 |
| ATOM | 2516 | HA   | ARG | 160 | 31.307 | 39.236 | 8.730  | 0.00 | 0.00 |
| ATOM | 2517 | CB   | ARG | 160 | 31.830 | 37.290 | 8.092  | 0.00 | 0.00 |
| ATOM | 2518 | HB2  | ARG | 160 | 32.655 | 37.163 | 8.464  | 0.00 | 0.00 |
| ATOM | 2519 | HB3  | ARG | 160 | 31.482 | 36.460 | 8.052  | 0.00 | 0.00 |
| ATOM | 2520 | CG   | ARG | 160 | 32.090 | 37.581 | 6.841  | 0.00 | 0.00 |
| ATOM | 2521 | HG2  | ARG | 160 | 32.455 | 37.186 | 6.466  | 0.00 | 0.00 |
| ATOM | 2522 | HG3  | ARG | 160 | 31.517 | 37.563 | 6.617  | 0.00 | 0.00 |
| ATOM | 2523 | CD   | ARG | 160 | 32.632 | 38.379 | 6.351  | 0.00 | 0.00 |
| ATOM | 2524 | HD2  | ARG | 160 | 32.701 | 38.409 | 5.699  | 0.00 | 0.00 |
| ATOM | 2525 | HD3  | ARG | 160 | 32.335 | 38.761 | 6.481  | 0.00 | 0.00 |
| ATOM | 2526 | NE   | ARG | 160 | 33.439 | 38.605 | 6.535  | 0.00 | 0.00 |
| ATOM | 2527 | HE   | ARG | 160 | 33.690 | 38.247 | 6.723  | 0.00 | 0.00 |
| ATOM | 2528 | CZ   | ARG | 160 | 33.876 | 39.237 | 6.492  | 0.00 | 0.00 |
| ATOM | 2529 | NH1  | ARG | 160 | 34.541 | 39.355 | 6.736  | 0.00 | 0.00 |
| ATOM | 2530 | 1HH1 | ARG | 160 | 34.717 | 38.971 | 6.953  | 0.00 | 0.00 |
| ATOM | 2531 | 2HH1 | ARG | 160 | 34.872 | 39.832 | 6.707  | 0.00 | 0.00 |
| ATOM | 2532 | NH2  | ARG | 160 | 33.672 | 39.764 | 6.217  | 0.00 | 0.00 |
| ATOM | 2533 | 1HH2 | ARG | 160 | 33.201 | 39.710 | 5.965  | 0.00 | 0.00 |
| ATOM | 2534 | 2HH2 | ARG | 160 | 34.042 | 40.229 | 6.186  | 0.00 | 0.00 |
| ATOM | 2535 | C    | ARG | 160 | 29.517 | 38.210 | 8.477  | 0.00 | 0.00 |
| ATOM | 2536 | O    | ARG | 160 | 29.111 | 39.062 | 7.730  | 0.00 | 0.00 |
| ATOM | 2537 | N    | PHE | 161 | 28.718 | 37.304 | 8.990  | 0.00 | 0.00 |
| ATOM | 2538 | H    | PHE | 161 | 29.123 | 36.627 | 9.580  | 0.00 | 0.00 |
| ATOM | 2539 | CA   | PHE | 161 | 27.294 | 37.224 | 8.702  | 0.00 | 0.00 |
| ATOM | 2540 | HA   | PHE | 161 | 27.167 | 37.202 | 7.636  | 0.00 | 0.00 |
| ATOM | 2541 | CB   | PHE | 161 | 26.743 | 35.928 | 9.259  | 0.00 | 0.00 |
| ATOM | 2542 | HB2  | PHE | 161 | 27.163 | 35.169 | 8.841  | 0.00 | 0.00 |
| ATOM | 2543 | HB3  | PHE | 161 | 26.950 | 35.854 | 10.189 | 0.00 | 0.00 |
| ATOM | 2544 | CG   | PHE | 161 | 25.388 | 35.697 | 9.145  | 0.00 | 0.00 |
| ATOM | 2545 | CD1  | PHE | 161 | 24.637 | 35.893 | 10.016 | 0.00 | 0.00 |
| ATOM | 2546 | HD1  | PHE | 161 | 25.021 | 36.192 | 10.773 | 0.00 | 0.00 |
| ATOM | 2547 | CE1  | PHE | 161 | 23.383 | 35.701 | 9.898  | 0.00 | 0.00 |
| ATOM | 2548 | HE1  | PHE | 161 | 22.814 | 35.850 | 10.562 | 0.00 | 0.00 |
| ATOM | 2549 | CZ   | PHE | 161 | 22.873 | 35.309 | 8.912  | 0.00 | 0.00 |
| ATOM | 2550 | HZ   | PHE | 161 | 21.915 | 35.158 | 8.821  | 0.00 | 0.00 |
| ATOM | 2551 | CE2  | PHE | 161 | 23.618 | 35.105 | 8.045  | 0.00 | 0.00 |
| ATOM | 2552 | HE2  | PHE | 161 | 23.229 | 34.798 | 7.294  | 0.00 | 0.00 |
| ATOM | 2553 | CD2  | PHE | 161 | 24.872 | 35.298 | 8.161  | 0.00 | 0.00 |
| ATOM | 2554 | HD2  | PHE | 161 | 25.437 | 35.140 | 7.494  | 0.00 | 0.00 |
| ATOM | 2555 | C    | PHE | 161 | 26.511 | 38.434 | 9.204  | 0.00 | 0.00 |
| ATOM | 2556 | O    | PHE | 161 | 25.675 | 38.947 | 8.484  | 0.00 | 0.00 |
| ATOM | 2557 | N    | VAL | 162 | 26.796 | 38.932 | 10.399 | 0.00 | 0.00 |
| ATOM | 2558 | H    | VAL | 162 | 27.476 | 38.464 | 10.952 | 0.00 | 0.00 |
| ATOM | 2559 | CA   | VAL | 162 | 26.129 | 40.114 | 10.950 | 0.00 | 0.00 |
| ATOM | 2560 | HA   | VAL | 162 | 25.073 | 39.998 | 10.800 | 0.00 | 0.00 |
| ATOM | 2561 | CB   | VAL | 162 | 26.357 | 40.239 | 12.453 | 0.00 | 0.00 |
| ATOM | 2562 | HB   | VAL | 162 | 27.010 | 40.364 | 12.632 | 0.00 | 0.00 |
| ATOM | 2563 | CG1  | VAL | 162 | 25.878 | 40.958 | 13.061 | 0.00 | 0.00 |
| ATOM | 2564 | 1HG1 | VAL | 162 | 25.766 | 41.159 | 13.174 | 0.00 | 0.00 |

|      |      |      |     |     |        |        |        |      |      |
|------|------|------|-----|-----|--------|--------|--------|------|------|
| ATOM | 2565 | ZHG1 | VAL | 162 | 25.746 | 41.117 | 13.202 | 0.00 | 0.00 |
| ATOM | 2566 | 3HG1 | VAL | 162 | 25.786 | 41.131 | 13.266 | 0.00 | 0.00 |
| ATOM | 2567 | CG2  | VAL | 162 | 26.152 | 39.467 | 13.188 | 0.00 | 0.00 |
| ATOM | 2568 | 1HG2 | VAL | 162 | 26.103 | 39.264 | 13.348 | 0.00 | 0.00 |
| ATOM | 2569 | 2HG2 | VAL | 162 | 26.122 | 39.285 | 13.374 | 0.00 | 0.00 |
| ATOM | 2570 | 3HG2 | VAL | 162 | 26.090 | 39.281 | 13.391 | 0.00 | 0.00 |
| ATOM | 2571 | C    | VAL | 162 | 26.511 | 41.384 | 10.206 | 0.00 | 0.00 |
| ATOM | 2572 | O    | VAL | 162 | 25.653 | 42.202 | 9.937  | 0.00 | 0.00 |
| ATOM | 2573 | N    | VAL | 163 | 27.763 | 41.536 | 9.802  | 0.00 | 0.00 |
| ATOM | 2574 | H    | VAL | 163 | 28.424 | 40.839 | 10.052 | 0.00 | 0.00 |
| ATOM | 2575 | CA   | VAL | 163 | 28.216 | 42.677 | 9.006  | 0.00 | 0.00 |
| ATOM | 2576 | HA   | VAL | 163 | 27.845 | 43.573 | 9.457  | 0.00 | 0.00 |
| ATOM | 2577 | CB   | VAL | 163 | 29.727 | 42.762 | 9.006  | 0.00 | 0.00 |
| ATOM | 2578 | HB   | VAL | 163 | 30.071 | 42.084 | 8.711  | 0.00 | 0.00 |
| ATOM | 2579 | CG1  | VAL | 163 | 30.252 | 43.645 | 8.380  | 0.00 | 0.00 |
| ATOM | 2580 | 1HG1 | VAL | 163 | 30.353 | 43.862 | 8.229  | 0.00 | 0.00 |
| ATOM | 2581 | 2HG1 | VAL | 163 | 30.409 | 43.868 | 8.235  | 0.00 | 0.00 |
| ATOM | 2582 | 3HG1 | VAL | 163 | 30.395 | 43.845 | 8.211  | 0.00 | 0.00 |
| ATOM | 2583 | CG2  | VAL | 163 | 30.320 | 42.916 | 10.064 | 0.00 | 0.00 |
| ATOM | 2584 | 1HG2 | VAL | 163 | 30.475 | 42.952 | 10.333 | 0.00 | 0.00 |
| ATOM | 2585 | 2HG2 | VAL | 163 | 30.440 | 42.937 | 10.308 | 0.00 | 0.00 |
| ATOM | 2586 | 3HG2 | VAL | 163 | 30.496 | 42.964 | 10.327 | 0.00 | 0.00 |
| ATOM | 2587 | C    | VAL | 163 | 27.647 | 42.657 | 7.599  | 0.00 | 0.00 |
| ATOM | 2588 | O    | VAL | 163 | 27.230 | 43.686 | 7.100  | 0.00 | 0.00 |
| ATOM | 2589 | N    | ASP | 164 | 27.541 | 41.493 | 6.982  | 0.00 | 0.00 |
| ATOM | 2590 | H    | ASP | 164 | 27.920 | 40.688 | 7.423  | 0.00 | 0.00 |
| ATOM | 2591 | CA   | ASP | 164 | 26.908 | 41.324 | 5.682  | 0.00 | 0.00 |
| ATOM | 2592 | HA   | ASP | 164 | 27.367 | 42.004 | 4.987  | 0.00 | 0.00 |
| ATOM | 2593 | CB   | ASP | 164 | 27.162 | 39.908 | 5.194  | 0.00 | 0.00 |
| ATOM | 2594 | HB2  | ASP | 164 | 28.208 | 39.706 | 5.224  | 0.00 | 0.00 |
| ATOM | 2595 | HB3  | ASP | 164 | 26.681 | 39.211 | 5.835  | 0.00 | 0.00 |
| ATOM | 2596 | CG   | ASP | 164 | 26.679 | 39.706 | 3.793  | 0.00 | 0.00 |
| ATOM | 2597 | OD1  | ASP | 164 | 26.447 | 39.635 | 3.260  | 0.00 | 0.00 |
| ATOM | 2598 | OD2  | ASP | 164 | 26.526 | 39.640 | 3.214  | 0.00 | 0.00 |
| ATOM | 2599 | C    | ASP | 164 | 25.417 | 41.650 | 5.714  | 0.00 | 0.00 |
| ATOM | 2600 | O    | ASP | 164 | 24.911 | 42.283 | 4.801  | 0.00 | 0.00 |
| ATOM | 2601 | N    | PHE | 165 | 24.724 | 41.302 | 6.791  | 0.00 | 0.00 |
| ATOM | 2602 | H    | PHE | 165 | 25.184 | 40.765 | 7.489  | 0.00 | 0.00 |
| ATOM | 2603 | CA   | PHE | 165 | 23.337 | 41.684 | 7.011  | 0.00 | 0.00 |
| ATOM | 2604 | HA   | PHE | 165 | 22.765 | 41.385 | 6.148  | 0.00 | 0.00 |
| ATOM | 2605 | CB   | PHE | 165 | 22.778 | 40.947 | 8.224  | 0.00 | 0.00 |
| ATOM | 2606 | HB2  | PHE | 165 | 22.945 | 39.906 | 8.102  | 0.00 | 0.00 |
| ATOM | 2607 | HB3  | PHE | 165 | 23.301 | 41.243 | 9.099  | 0.00 | 0.00 |
| ATOM | 2608 | CG   | PHE | 165 | 21.322 | 41.162 | 8.450  | 0.00 | 0.00 |
| ATOM | 2609 | CD1  | PHE | 165 | 20.413 | 40.313 | 7.907  | 0.00 | 0.00 |
| ATOM | 2610 | HD1  | PHE | 165 | 20.747 | 39.496 | 7.356  | 0.00 | 0.00 |
| ATOM | 2611 | CE1  | PHE | 165 | 19.070 | 40.537 | 8.070  | 0.00 | 0.00 |
| ATOM | 2612 | HE1  | PHE | 165 | 18.382 | 39.892 | 7.645  | 0.00 | 0.00 |
| ATOM | 2613 | CZ   | PHE | 165 | 18.629 | 41.613 | 8.770  | 0.00 | 0.00 |
| ATOM | 2614 | HZ   | PHE | 165 | 17.603 | 41.793 | 8.879  | 0.00 | 0.00 |
| ATOM | 2615 | CE2  | PHE | 165 | 19.530 | 42.454 | 9.328  | 0.00 | 0.00 |
| ATOM | 2616 | HE2  | PHE | 165 | 19.190 | 43.274 | 9.867  | 0.00 | 0.00 |
| ATOM | 2617 | CD2  | PHE | 165 | 20.873 | 42.227 | 9.175  | 0.00 | 0.00 |
| ATOM | 2618 | HD2  | PHE | 165 | 21.559 | 42.878 | 9.602  | 0.00 | 0.00 |
| ATOM | 2619 | C    | PHE | 165 | 23.187 | 43.197 | 7.152  | 0.00 | 0.00 |
| ATOM | 2620 | O    | PHE | 165 | 22.332 | 43.786 | 6.514  | 0.00 | 0.00 |
| ATOM | 2621 | N    | MET | 166 | 24.044 | 43.846 | 7.932  | 0.00 | 0.00 |
| ATOM | 2622 | H    | MET | 166 | 24.727 | 43.313 | 8.419  | 0.00 | 0.00 |
| ATOM | 2623 | CA   | MET | 166 | 24.033 | 45.297 | 8.101  | 0.00 | 0.00 |
| ATOM | 2624 | HA   | MET | 166 | 23.046 | 45.588 | 8.413  | 0.00 | 0.00 |
| ATOM | 2625 | CB   | MET | 166 | 25.020 | 45.720 | 9.182  | 0.00 | 0.00 |
| ATOM | 2626 | HB2  | MET | 166 | 25.942 | 45.297 | 9.023  | 0.00 | 0.00 |
| ATOM | 2627 | HB3  | MET | 166 | 25.146 | 46.738 | 9.147  | 0.00 | 0.00 |
| ATOM | 2628 | CG   | MET | 166 | 24.603 | 45.384 | 10.534 | 0.00 | 0.00 |
| ATOM | 2629 | HG2  | MET | 166 | 23.895 | 45.330 | 10.608 | 0.00 | 0.00 |
| ATOM | 2630 | HG3  | MET | 166 | 24.843 | 44.730 | 10.724 | 0.00 | 0.00 |
| ATOM | 2631 | SD   | MET | 166 | 24.836 | 46.087 | 11.751 | 0.00 | 0.00 |
| ATOM | 2632 | CE   | MET | 166 | 24.869 | 45.633 | 12.819 | 0.00 | 0.00 |
| ATOM | 2633 | HE1  | MET | 166 | 24.868 | 45.544 | 13.040 | 0.00 | 0.00 |
| ATOM | 2634 | HE2  | MET | 166 | 24.879 | 45.537 | 13.019 | 0.00 | 0.00 |
| ATOM | 2635 | HE3  | MET | 166 | 24.885 | 45.550 | 13.049 | 0.00 | 0.00 |
| ATOM | 2636 | C    | MET | 166 | 24.309 | 46.039 | 6.796  | 0.00 | 0.00 |
| ATOM | 2637 | O    | MET | 166 | 23.693 | 47.054 | 6.544  | 0.00 | 0.00 |
| ATOM | 2638 | N    | LEU | 167 | 25.168 | 45.514 | 5.939  | 0.00 | 0.00 |
| ATOM | 2639 | H    | LEU | 167 | 25.670 | 44.710 | 6.229  | 0.00 | 0.00 |
| ATOM | 2640 | CA   | LEU | 167 | 25.425 | 46.039 | 4.606  | 0.00 | 0.00 |
| ATOM | 2641 | HA   | LEU | 167 | 25.592 | 47.101 | 4.692  | 0.00 | 0.00 |
| ATOM | 2642 | CB   | LEU | 167 | 26.707 | 45.401 | 4.068  | 0.00 | 0.00 |
| ATOM | 2643 | HB2  | LEU | 167 | 27.464 | 45.555 | 4.744  | 0.00 | 0.00 |
| ATOM | 2644 | HB3  | LEU | 167 | 26.578 | 44.383 | 3.999  | 0.00 | 0.00 |
| ATOM | 2645 | CG   | LEU | 167 | 27.189 | 45.862 | 2.756  | 0.00 | 0.00 |
| ATOM | 2646 | HG   | LEU | 167 | 26.570 | 45.644 | 2.172  | 0.00 | 0.00 |
| ATOM | 2647 | CD1  | LEU | 167 | 27.455 | 47.103 | 2.587  | 0.00 | 0.00 |
| ATOM | 2648 | 1HD1 | LEU | 167 | 27.461 | 47.411 | 2.551  | 0.00 | 0.00 |
| ATOM | 2649 | 2HD1 | LEU | 167 | 27.532 | 47.403 | 2.576  | 0.00 | 0.00 |
| ATOM | 2650 | 3HD1 | LEU | 167 | 27.562 | 47.408 | 2.488  | 0.00 | 0.00 |
| ATOM | 2651 | CD2  | LEU | 167 | 28.302 | 45.340 | 2.352  | 0.00 | 0.00 |
| ATOM | 2652 | 1HD2 | LEU | 167 | 28.568 | 45.219 | 2.220  | 0.00 | 0.00 |
| ATOM | 2653 | 2HD2 | LEU | 167 | 28.568 | 45.226 | 2.273  | 0.00 | 0.00 |
| ATOM | 2654 | 3HD2 | LEU | 167 | 28.576 | 45.190 | 2.254  | 0.00 | 0.00 |
| ATOM | 2655 | C    | LEU | 167 | 24.228 | 45.849 | 3.675  | 0.00 | 0.00 |
| ATOM | 2656 | O    | LEU | 167 | 23.798 | 46.784 | 3.064  | 0.00 | 0.00 |
| ATOM | 2657 | N    | HIP | 168 | 23.652 | 44.668 | 3.592  | 0.00 | 0.00 |
| ATOM | 2658 | H    | HIP | 168 | 24.046 | 43.945 | 4.131  | 0.00 | 0.00 |
| ATOM | 2659 | CA   | HIP | 168 | 22.588 | 44.331 | 2.643  | 0.00 | 0.00 |
| ATOM | 2660 | HA   | HIP | 168 | 22.745 | 44.906 | 1.753  | 0.00 | 0.00 |
| ATOM | 2661 | CB   | HIP | 168 | 22.707 | 42.877 | 2.245  | 0.00 | 0.00 |
| ATOM | 2662 | HB2  | HIP | 168 | 22.700 | 42.255 | 3.089  | 0.00 | 0.00 |
| ATOM | 2663 | HB3  | HIP | 168 | 21.884 | 42.623 | 1.663  | 0.00 | 0.00 |
| ATOM | 2664 | CG   | HIP | 168 | 23.895 | 42.576 | 1.472  | 0.00 | 0.00 |
| ATOM | 2665 | ND1  | HIP | 168 | 24.882 | 41.800 | 1.746  | 0.00 | 0.00 |
| ATOM | 2666 | HD1  | HIP | 168 | 24.943 | 41.309 | 2.492  | 0.00 | 0.00 |
| ATOM | 2667 | CE1  | HIP | 168 | 25.752 | 41.783 | 0.829  | 0.00 | 0.00 |
| ATOM | 2668 | HE1  | HIP | 168 | 26.619 | 41.249 | 0.780  | 0.00 | 0.00 |
| ATOM | 2669 | NE2  | HIP | 168 | 25.347 | 42.525 | -0.017 | 0.00 | 0.00 |

|      |      |      |     |     |        |        |        |      |      |
|------|------|------|-----|-----|--------|--------|--------|------|------|
| ATOM | 2670 | HE2  | HIP | 168 | 25.808 | 42.680 | -0.795 | 0.00 | 0.00 |
| ATOM | 2671 | CD2  | HIP | 168 | 24.184 | 43.027 | 0.368  | 0.00 | 0.00 |
| ATOM | 2672 | HD2  | HIP | 168 | 23.609 | 43.652 | -0.109 | 0.00 | 0.00 |
| ATOM | 2673 | C    | HIP | 168 | 21.181 | 44.714 | 3.074  | 0.00 | 0.00 |
| ATOM | 2674 | O    | HIP | 168 | 20.310 | 44.621 | 2.308  | 0.00 | 0.00 |
| ATOM | 2675 | N    | HIP | 169 | 20.953 | 45.181 | 4.267  | 0.00 | 0.00 |
| ATOM | 2676 | H    | HIP | 169 | 21.705 | 45.154 | 4.861  | 0.00 | 0.00 |
| ATOM | 2677 | CA   | HIP | 169 | 19.688 | 45.725 | 4.763  | 0.00 | 0.00 |
| ATOM | 2678 | HA   | HIP | 169 | 18.979 | 45.723 | 3.957  | 0.00 | 0.00 |
| ATOM | 2679 | CB   | HIP | 169 | 19.116 | 44.821 | 5.847  | 0.00 | 0.00 |
| ATOM | 2680 | HB2  | HIP | 169 | 19.795 | 44.613 | 6.560  | 0.00 | 0.00 |
| ATOM | 2681 | HB3  | HIP | 169 | 18.357 | 45.275 | 6.312  | 0.00 | 0.00 |
| ATOM | 2682 | CG   | HIP | 169 | 18.611 | 43.600 | 5.381  | 0.00 | 0.00 |
| ATOM | 2683 | ND1  | HIP | 169 | 17.515 | 43.356 | 4.862  | 0.00 | 0.00 |
| ATOM | 2684 | HD1  | HIP | 169 | 16.912 | 43.958 | 4.738  | 0.00 | 0.00 |
| ATOM | 2685 | CE1  | HIP | 169 | 17.410 | 42.184 | 4.523  | 0.00 | 0.00 |
| ATOM | 2686 | HE1  | HIP | 169 | 16.663 | 41.735 | 4.076  | 0.00 | 0.00 |
| ATOM | 2687 | NE2  | HIP | 169 | 18.404 | 41.676 | 4.816  | 0.00 | 0.00 |
| ATOM | 2688 | HE2  | HIP | 169 | 18.572 | 40.819 | 4.648  | 0.00 | 0.00 |
| ATOM | 2689 | CD2  | HIP | 169 | 19.167 | 42.551 | 5.354  | 0.00 | 0.00 |
| ATOM | 2690 | HD2  | HIP | 169 | 20.039 | 42.436 | 5.682  | 0.00 | 0.00 |
| ATOM | 2691 | C    | HIP | 169 | 19.785 | 47.184 | 5.161  | 0.00 | 0.00 |
| ATOM | 2692 | O    | HIP | 169 | 19.312 | 47.566 | 6.019  | 0.00 | 0.00 |
| ATOM | 2693 | N    | CYS | 170 | 20.408 | 48.002 | 4.546  | 0.00 | 0.00 |
| ATOM | 2694 | H    | CYS | 170 | 20.743 | 47.614 | 3.839  | 0.00 | 0.00 |
| ATOM | 2695 | CA   | CYS | 170 | 20.526 | 49.448 | 4.670  | 0.00 | 0.00 |
| ATOM | 2696 | HA   | CYS | 170 | 21.268 | 49.743 | 3.994  | 0.00 | 0.00 |
| ATOM | 2697 | CB   | CYS | 170 | 19.282 | 50.085 | 4.186  | 0.00 | 0.00 |
| ATOM | 2698 | HB2  | CYS | 170 | 18.602 | 49.939 | 4.557  | 0.00 | 0.00 |
| ATOM | 2699 | HB3  | CYS | 170 | 19.253 | 50.881 | 4.196  | 0.00 | 0.00 |
| ATOM | 2700 | SG   | CYS | 170 | 18.971 | 49.812 | 2.978  | 0.00 | 0.00 |
| ATOM | 2701 | HG   | CYS | 170 | 18.557 | 49.955 | 2.828  | 0.00 | 0.00 |
| ATOM | 2702 | C    | CYS | 170 | 21.001 | 50.024 | 5.992  | 0.00 | 0.00 |
| ATOM | 2703 | O    | CYS | 170 | 20.984 | 51.217 | 6.149  | 0.00 | 0.00 |
| ATOM | 2704 | N    | ILE | 171 | 21.453 | 49.227 | 6.943  | 0.00 | 0.00 |
| ATOM | 2705 | H    | ILE | 171 | 21.483 | 48.271 | 6.761  | 0.00 | 0.00 |
| ATOM | 2706 | CA   | ILE | 171 | 21.872 | 49.688 | 8.263  | 0.00 | 0.00 |
| ATOM | 2707 | HA   | ILE | 171 | 21.161 | 50.421 | 8.602  | 0.00 | 0.00 |
| ATOM | 2708 | CB   | ILE | 171 | 21.874 | 48.538 | 9.280  | 0.00 | 0.00 |
| ATOM | 2709 | HB   | ILE | 171 | 22.609 | 47.869 | 9.018  | 0.00 | 0.00 |
| ATOM | 2710 | CG2  | ILE | 171 | 22.198 | 49.023 | 10.622 | 0.00 | 0.00 |
| ATOM | 2711 | 1HG2 | ILE | 171 | 22.301 | 49.135 | 10.952 | 0.00 | 0.00 |
| ATOM | 2712 | 2HG2 | ILE | 171 | 22.279 | 49.151 | 10.951 | 0.00 | 0.00 |
| ATOM | 2713 | 3HG2 | ILE | 171 | 22.267 | 49.132 | 10.959 | 0.00 | 0.00 |
| ATOM | 2714 | CG1  | ILE | 171 | 20.612 | 47.780 | 9.333  | 0.00 | 0.00 |
| ATOM | 2715 | 2HG1 | ILE | 171 | 20.199 | 47.985 | 9.419  | 0.00 | 0.00 |
| ATOM | 2716 | 3HG1 | ILE | 171 | 20.405 | 47.542 | 8.949  | 0.00 | 0.00 |
| ATOM | 2717 | CD1  | ILE | 171 | 20.148 | 47.012 | 9.761  | 0.00 | 0.00 |
| ATOM | 2718 | 1HD1 | ILE | 171 | 20.037 | 46.829 | 9.857  | 0.00 | 0.00 |
| ATOM | 2719 | 2HD1 | ILE | 171 | 20.040 | 46.827 | 9.856  | 0.00 | 0.00 |
| ATOM | 2720 | 3HD1 | ILE | 171 | 20.005 | 46.810 | 9.873  | 0.00 | 0.00 |
| ATOM | 2721 | C    | ILE | 171 | 23.217 | 50.397 | 8.196  | 0.00 | 0.00 |
| ATOM | 2722 | O    | ILE | 171 | 23.375 | 51.454 | 8.777  | 0.00 | 0.00 |
| ATOM | 2723 | N    | ALA | 172 | 24.169 | 49.883 | 7.429  | 0.00 | 0.00 |
| ATOM | 2724 | H    | ALA | 172 | 23.987 | 49.033 | 6.951  | 0.00 | 0.00 |
| ATOM | 2725 | CA   | ALA | 172 | 25.447 | 50.542 | 7.213  | 0.00 | 0.00 |
| ATOM | 2726 | HA   | ALA | 172 | 25.874 | 50.771 | 8.173  | 0.00 | 0.00 |
| ATOM | 2727 | CB   | ALA | 172 | 26.389 | 49.580 | 6.510  | 0.00 | 0.00 |
| ATOM | 2728 | HB1  | ALA | 172 | 26.673 | 49.372 | 6.379  | 0.00 | 0.00 |
| ATOM | 2729 | HB2  | ALA | 172 | 26.586 | 49.300 | 6.364  | 0.00 | 0.00 |
| ATOM | 2730 | HB3  | ALA | 172 | 26.610 | 49.377 | 6.283  | 0.00 | 0.00 |
| ATOM | 2731 | C    | ALA | 172 | 25.291 | 51.875 | 6.467  | 0.00 | 0.00 |
| ATOM | 2732 | O    | ALA | 172 | 25.975 | 52.828 | 6.784  | 0.00 | 0.00 |
| ATOM | 2733 | N    | ARG | 173 | 24.333 | 51.984 | 5.552  | 0.00 | 0.00 |
| ATOM | 2734 | H    | ARG | 173 | 23.866 | 51.149 | 5.295  | 0.00 | 0.00 |
| ATOM | 2735 | CA   | ARG | 173 | 23.942 | 53.233 | 4.888  | 0.00 | 0.00 |
| ATOM | 2736 | HA   | ARG | 173 | 24.828 | 53.698 | 4.486  | 0.00 | 0.00 |
| ATOM | 2737 | CB   | ARG | 173 | 23.003 | 52.910 | 3.730  | 0.00 | 0.00 |
| ATOM | 2738 | HB2  | ARG | 173 | 23.401 | 52.139 | 3.184  | 0.00 | 0.00 |
| ATOM | 2739 | HB3  | ARG | 173 | 22.098 | 52.593 | 4.085  | 0.00 | 0.00 |
| ATOM | 2740 | CG   | ARG | 173 | 22.756 | 54.014 | 2.803  | 0.00 | 0.00 |
| ATOM | 2741 | HG2  | ARG | 173 | 22.337 | 54.761 | 3.295  | 0.00 | 0.00 |
| ATOM | 2742 | HG3  | ARG | 173 | 23.619 | 54.334 | 2.463  | 0.00 | 0.00 |
| ATOM | 2743 | CD   | ARG | 173 | 21.887 | 53.682 | 1.663  | 0.00 | 0.00 |
| ATOM | 2744 | HD2  | ARG | 173 | 21.047 | 53.365 | 2.027  | 0.00 | 0.00 |
| ATOM | 2745 | HD3  | ARG | 173 | 21.701 | 54.473 | 1.121  | 0.00 | 0.00 |
| ATOM | 2746 | NE   | ARG | 173 | 22.393 | 52.770 | 0.816  | 0.00 | 0.00 |
| ATOM | 2747 | HE   | ARG | 173 | 23.222 | 52.519 | 0.935  | 0.00 | 0.00 |
| ATOM | 2748 | CZ   | ARG | 173 | 21.893 | 52.220 | -0.088 | 0.00 | 0.00 |
| ATOM | 2749 | NH1  | ARG | 173 | 20.827 | 52.436 | -0.418 | 0.00 | 0.00 |
| ATOM | 2750 | 1HH1 | ARG | 173 | 20.343 | 53.047 | 0.006  | 0.00 | 0.00 |
| ATOM | 2751 | 2HH1 | ARG | 173 | 20.500 | 51.990 | -1.109 | 0.00 | 0.00 |
| ATOM | 2752 | NH2  | ARG | 173 | 22.486 | 51.419 | -0.684 | 0.00 | 0.00 |
| ATOM | 2753 | 1HH2 | ARG | 173 | 23.313 | 51.238 | -0.415 | 0.00 | 0.00 |
| ATOM | 2754 | 2HH2 | ARG | 173 | 22.126 | 50.994 | -1.366 | 0.00 | 0.00 |
| ATOM | 2755 | C    | ARG | 173 | 23.334 | 54.245 | 5.850  | 0.00 | 0.00 |
| ATOM | 2756 | O    | ARG | 173 | 23.684 | 55.406 | 5.792  | 0.00 | 0.00 |
| ATOM | 2757 | N    | TRP | 174 | 22.495 | 53.813 | 6.777  | 0.00 | 0.00 |
| ATOM | 2758 | H    | TRP | 174 | 22.231 | 52.858 | 6.754  | 0.00 | 0.00 |
| ATOM | 2759 | CA   | TRP | 174 | 21.924 | 54.671 | 7.813  | 0.00 | 0.00 |
| ATOM | 2760 | HA   | TRP | 174 | 21.456 | 55.519 | 7.336  | 0.00 | 0.00 |
| ATOM | 2761 | CB   | TRP | 174 | 20.843 | 53.905 | 8.562  | 0.00 | 0.00 |
| ATOM | 2762 | HB2  | TRP | 174 | 20.164 | 53.493 | 7.849  | 0.00 | 0.00 |
| ATOM | 2763 | HB3  | TRP | 174 | 21.286 | 53.083 | 9.086  | 0.00 | 0.00 |
| ATOM | 2764 | CG   | TRP | 174 | 20.053 | 54.696 | 9.533  | 0.00 | 0.00 |
| ATOM | 2765 | CD1  | TRP | 174 | 19.005 | 55.438 | 9.244  | 0.00 | 0.00 |
| ATOM | 2766 | HD1  | TRP | 174 | 18.610 | 55.544 | 8.278  | 0.00 | 0.00 |
| ATOM | 2767 | NE1  | TRP | 174 | 18.521 | 56.032 | 10.369 | 0.00 | 0.00 |
| ATOM | 2768 | HE1  | TRP | 174 | 17.741 | 56.623 | 10.382 | 0.00 | 0.00 |
| ATOM | 2769 | CE2  | TRP | 174 | 19.241 | 55.707 | 11.448 | 0.00 | 0.00 |
| ATOM | 2770 | CZ2  | TRP | 174 | 19.155 | 56.067 | 12.771 | 0.00 | 0.00 |
| ATOM | 2771 | HZ2  | TRP | 174 | 18.404 | 56.728 | 13.104 | 0.00 | 0.00 |
| ATOM | 2772 | CH2  | TRP | 174 | 20.072 | 55.568 | 13.645 | 0.00 | 0.00 |
| ATOM | 2773 | HH2  | TRP | 174 | 20.035 | 55.856 | 14.658 | 0.00 | 0.00 |
| ATOM | 2774 | CZ3  | TRP | 174 | 21.043 | 54.701 | 13.192 | 0.00 | 0.00 |

|      |      |      |     |     |        |        |        |      |      |
|------|------|------|-----|-----|--------|--------|--------|------|------|
| ATOM | 2775 | HZ3  | TRP | 174 | 21.738 | 54.317 | 13.866 | 0.00 | 0.00 |
| ATOM | 2776 | CE3  | TRP | 174 | 21.115 | 54.340 | 11.861 | 0.00 | 0.00 |
| ATOM | 2777 | HE3  | TRP | 174 | 21.858 | 53.674 | 11.523 | 0.00 | 0.00 |
| ATOM | 2778 | CD2  | TRP | 174 | 20.225 | 54.843 | 10.949 | 0.00 | 0.00 |
| ATOM | 2779 | C    | TRP | 174 | 22.990 | 55.227 | 8.757  | 0.00 | 0.00 |
| ATOM | 2780 | O    | TRP | 174 | 22.967 | 56.399 | 9.076  | 0.00 | 0.00 |
| ATOM | 2781 | N    | ILE | 175 | 23.978 | 54.424 | 9.134  | 0.00 | 0.00 |
| ATOM | 2782 | H    | ILE | 175 | 23.922 | 53.470 | 8.864  | 0.00 | 0.00 |
| ATOM | 2783 | CA   | ILE | 175 | 25.127 | 54.855 | 9.936  | 0.00 | 0.00 |
| ATOM | 2784 | HA   | ILE | 175 | 24.756 | 55.444 | 10.760 | 0.00 | 0.00 |
| ATOM | 2785 | CB   | ILE | 175 | 25.852 | 53.635 | 10.532 | 0.00 | 0.00 |
| ATOM | 2786 | HB   | ILE | 175 | 26.088 | 52.970 | 9.728  | 0.00 | 0.00 |
| ATOM | 2787 | CG2  | ILE | 175 | 27.157 | 54.022 | 11.210 | 0.00 | 0.00 |
| ATOM | 2788 | 1HG2 | ILE | 175 | 27.452 | 54.138 | 11.431 | 0.00 | 0.00 |
| ATOM | 2789 | 2HG2 | ILE | 175 | 27.500 | 54.044 | 11.368 | 0.00 | 0.00 |
| ATOM | 2790 | 3HG2 | ILE | 175 | 27.496 | 54.154 | 11.319 | 0.00 | 0.00 |
| ATOM | 2791 | CG1  | ILE | 175 | 24.969 | 52.868 | 11.514 | 0.00 | 0.00 |
| ATOM | 2792 | 2HG1 | ILE | 175 | 24.455 | 53.096 | 11.789 | 0.00 | 0.00 |
| ATOM | 2793 | 3HG1 | ILE | 175 | 24.671 | 52.364 | 11.333 | 0.00 | 0.00 |
| ATOM | 2794 | CD1  | ILE | 175 | 25.118 | 52.404 | 12.374 | 0.00 | 0.00 |
| ATOM | 2795 | 1HD1 | ILE | 175 | 25.188 | 52.295 | 12.590 | 0.00 | 0.00 |
| ATOM | 2796 | 2HD1 | ILE | 175 | 25.123 | 52.307 | 12.582 | 0.00 | 0.00 |
| ATOM | 2797 | 3HD1 | ILE | 175 | 25.133 | 52.260 | 12.587 | 0.00 | 0.00 |
| ATOM | 2798 | C    | ILE | 175 | 26.052 | 55.783 | 9.140  | 0.00 | 0.00 |
| ATOM | 2799 | O    | ILE | 175 | 26.515 | 56.774 | 9.679  | 0.00 | 0.00 |
| ATOM | 2800 | N    | ALA | 176 | 26.271 | 55.543 | 7.851  | 0.00 | 0.00 |
| ATOM | 2801 | H    | ALA | 176 | 25.910 | 54.705 | 7.457  | 0.00 | 0.00 |
| ATOM | 2802 | CA   | ALA | 176 | 27.030 | 56.436 | 6.983  | 0.00 | 0.00 |
| ATOM | 2803 | HA   | ALA | 176 | 28.001 | 56.592 | 7.421  | 0.00 | 0.00 |
| ATOM | 2804 | CB   | ALA | 176 | 27.229 | 55.773 | 5.628  | 0.00 | 0.00 |
| ATOM | 2805 | HB1  | ALA | 176 | 27.281 | 55.609 | 5.300  | 0.00 | 0.00 |
| ATOM | 2806 | HB2  | ALA | 176 | 27.276 | 55.621 | 5.295  | 0.00 | 0.00 |
| ATOM | 2807 | HB3  | ALA | 176 | 27.291 | 55.620 | 5.297  | 0.00 | 0.00 |
| ATOM | 2808 | C    | ALA | 176 | 26.374 | 57.812 | 6.841  | 0.00 | 0.00 |
| ATOM | 2809 | O    | ALA | 176 | 27.045 | 58.815 | 6.910  | 0.00 | 0.00 |
| ATOM | 2810 | N    | GLN | 177 | 25.058 | 57.875 | 6.741  | 0.00 | 0.00 |
| ATOM | 2811 | H    | GLN | 177 | 24.568 | 57.021 | 6.648  | 0.00 | 0.00 |
| ATOM | 2812 | CA   | GLN | 177 | 24.283 | 59.111 | 6.731  | 0.00 | 0.00 |
| ATOM | 2813 | HA   | GLN | 177 | 24.733 | 59.789 | 6.035  | 0.00 | 0.00 |
| ATOM | 2814 | CB   | GLN | 177 | 22.876 | 58.817 | 6.247  | 0.00 | 0.00 |
| ATOM | 2815 | HB2  | GLN | 177 | 22.534 | 58.069 | 6.564  | 0.00 | 0.00 |
| ATOM | 2816 | HB3  | GLN | 177 | 22.302 | 59.428 | 6.485  | 0.00 | 0.00 |
| ATOM | 2817 | CG   | GLN | 177 | 22.687 | 58.719 | 5.001  | 0.00 | 0.00 |
| ATOM | 2818 | HG2  | GLN | 177 | 22.917 | 59.439 | 4.638  | 0.00 | 0.00 |
| ATOM | 2819 | HG3  | GLN | 177 | 23.239 | 58.165 | 4.760  | 0.00 | 0.00 |
| ATOM | 2820 | CD   | GLN | 177 | 21.451 | 58.404 | 4.530  | 0.00 | 0.00 |
| ATOM | 2821 | OE1  | GLN | 177 | 20.727 | 58.143 | 4.954  | 0.00 | 0.00 |
| ATOM | 2822 | NE2  | GLN | 177 | 21.157 | 58.413 | 3.630  | 0.00 | 0.00 |
| ATOM | 2823 | 1HE2 | GLN | 177 | 20.351 | 58.217 | 3.321  | 0.00 | 0.00 |
| ATOM | 2824 | 2HE2 | GLN | 177 | 21.733 | 58.629 | 3.264  | 0.00 | 0.00 |
| ATOM | 2825 | C    | GLN | 177 | 24.275 | 59.830 | 8.078  | 0.00 | 0.00 |
| ATOM | 2826 | O    | GLN | 177 | 24.047 | 60.995 | 8.129  | 0.00 | 0.00 |
| ATOM | 2827 | N    | ARG | 178 | 24.582 | 59.163 | 9.163  | 0.00 | 0.00 |
| ATOM | 2828 | H    | ARG | 178 | 24.699 | 58.205 | 9.047  | 0.00 | 0.00 |
| ATOM | 2829 | CA   | ARG | 178 | 24.789 | 59.720 | 10.500 | 0.00 | 0.00 |
| ATOM | 2830 | HA   | ARG | 178 | 24.269 | 60.647 | 10.565 | 0.00 | 0.00 |
| ATOM | 2831 | CB   | ARG | 178 | 24.203 | 58.785 | 11.527 | 0.00 | 0.00 |
| ATOM | 2832 | HB2  | ARG | 178 | 24.097 | 58.008 | 11.311 | 0.00 | 0.00 |
| ATOM | 2833 | HB3  | ARG | 178 | 24.650 | 58.724 | 12.153 | 0.00 | 0.00 |
| ATOM | 2834 | CG   | ARG | 178 | 23.149 | 58.954 | 12.021 | 0.00 | 0.00 |
| ATOM | 2835 | HG2  | ARG | 178 | 23.120 | 59.103 | 12.176 | 0.00 | 0.00 |
| ATOM | 2836 | HG3  | ARG | 178 | 23.046 | 59.038 | 11.863 | 0.00 | 0.00 |
| ATOM | 2837 | CD   | ARG | 178 | 22.256 | 58.775 | 12.531 | 0.00 | 0.00 |
| ATOM | 2838 | HD2  | ARG | 178 | 22.020 | 58.564 | 12.318 | 0.00 | 0.00 |
| ATOM | 2839 | HD3  | ARG | 178 | 22.361 | 58.582 | 12.751 | 0.00 | 0.00 |
| ATOM | 2840 | NE   | ARG | 178 | 21.564 | 59.121 | 13.010 | 0.00 | 0.00 |
| ATOM | 2841 | HE   | ARG | 178 | 21.672 | 59.076 | 13.298 | 0.00 | 0.00 |
| ATOM | 2842 | CZ   | ARG | 178 | 20.793 | 59.491 | 13.107 | 0.00 | 0.00 |
| ATOM | 2843 | NH1  | ARG | 178 | 20.255 | 59.763 | 13.544 | 0.00 | 0.00 |
| ATOM | 2844 | 1HH1 | ARG | 178 | 20.430 | 59.694 | 13.803 | 0.00 | 0.00 |
| ATOM | 2845 | 2HH1 | ARG | 178 | 19.675 | 60.047 | 13.616 | 0.00 | 0.00 |
| ATOM | 2846 | NH2  | ARG | 178 | 20.531 | 59.604 | 12.785 | 0.00 | 0.00 |
| ATOM | 2847 | 1HH2 | ARG | 178 | 20.910 | 59.406 | 12.449 | 0.00 | 0.00 |
| ATOM | 2848 | 2HH2 | ARG | 178 | 19.940 | 59.889 | 12.882 | 0.00 | 0.00 |
| ATOM | 2849 | C    | ARG | 178 | 26.229 | 60.075 | 10.801 | 0.00 | 0.00 |
| ATOM | 2850 | O    | ARG | 178 | 26.501 | 60.549 | 11.837 | 0.00 | 0.00 |
| ATOM | 2851 | N    | GLY | 179 | 27.142 | 59.883 | 9.900  | 0.00 | 0.00 |
| ATOM | 2852 | H    | GLY | 179 | 26.836 | 59.497 | 9.078  | 0.00 | 0.00 |
| ATOM | 2853 | CA   | GLY | 179 | 28.540 | 60.259 | 9.991  | 0.00 | 0.00 |
| ATOM | 2854 | HA2  | GLY | 179 | 28.848 | 60.591 | 9.038  | 0.00 | 0.00 |
| ATOM | 2855 | HA3  | GLY | 179 | 28.651 | 61.069 | 10.664 | 0.00 | 0.00 |
| ATOM | 2856 | C    | GLY | 179 | 29.501 | 59.177 | 10.416 | 0.00 | 0.00 |
| ATOM | 2857 | O    | GLY | 179 | 30.618 | 59.482 | 10.746 | 0.00 | 0.00 |
| ATOM | 2858 | N    | GLY | 180 | 29.093 | 57.930 | 10.425 | 0.00 | 0.00 |
| ATOM | 2859 | H    | GLY | 180 | 28.160 | 57.754 | 10.169 | 0.00 | 0.00 |
| ATOM | 2860 | CA   | GLY | 180 | 29.876 | 56.801 | 10.898 | 0.00 | 0.00 |
| ATOM | 2861 | HA2  | GLY | 180 | 29.617 | 55.936 | 10.332 | 0.00 | 0.00 |
| ATOM | 2862 | HA3  | GLY | 180 | 30.911 | 56.987 | 10.737 | 0.00 | 0.00 |
| ATOM | 2863 | C    | GLY | 180 | 29.679 | 56.483 | 12.364 | 0.00 | 0.00 |
| ATOM | 2864 | O    | GLY | 180 | 29.006 | 57.192 | 13.067 | 0.00 | 0.00 |
| ATOM | 2865 | N    | TRP | 181 | 30.262 | 55.399 | 12.838 | 0.00 | 0.00 |
| ATOM | 2866 | H    | TRP | 181 | 30.832 | 54.882 | 12.225 | 0.00 | 0.00 |
| ATOM | 2867 | CA   | TRP | 181 | 30.046 | 54.863 | 14.173 | 0.00 | 0.00 |
| ATOM | 2868 | HA   | TRP | 181 | 28.999 | 54.682 | 14.291 | 0.00 | 0.00 |
| ATOM | 2869 | CB   | TRP | 181 | 30.758 | 53.527 | 14.317 | 0.00 | 0.00 |
| ATOM | 2870 | HB2  | TRP | 181 | 31.709 | 53.576 | 13.857 | 0.00 | 0.00 |
| ATOM | 2871 | HB3  | TRP | 181 | 30.926 | 53.342 | 15.346 | 0.00 | 0.00 |
| ATOM | 2872 | CG   | TRP | 181 | 30.028 | 52.357 | 13.800 | 0.00 | 0.00 |
| ATOM | 2873 | CD1  | TRP | 181 | 30.269 | 51.725 | 12.661 | 0.00 | 0.00 |
| ATOM | 2874 | HD1  | TRP | 181 | 31.025 | 51.991 | 11.979 | 0.00 | 0.00 |
| ATOM | 2875 | NE1  | TRP | 181 | 29.402 | 50.692 | 12.517 | 0.00 | 0.00 |
| ATOM | 2876 | HE1  | TRP | 181 | 29.412 | 50.070 | 11.752 | 0.00 | 0.00 |
| ATOM | 2877 | CE2  | TRP | 181 | 28.559 | 50.600 | 13.565 | 0.00 | 0.00 |
| ATOM | 2878 | CZ2  | TRP | 181 | 27.532 | 49.740 | 13.869 | 0.00 | 0.00 |
| ATOM | 2879 | HZ2  | TRP | 181 | 27.269 | 48.969 | 13.200 | 0.00 | 0.00 |

|      |      |      |     |     |        |        |        |      |      |
|------|------|------|-----|-----|--------|--------|--------|------|------|
| ATOM | 2880 | CH2  | TRP | 181 | 26.852 | 49.905 | 15.051 | 0.00 | 0.00 |
| ATOM | 2881 | HH2  | TRP | 181 | 26.064 | 49.255 | 15.302 | 0.00 | 0.00 |
| ATOM | 2882 | CZ3  | TRP | 181 | 27.204 | 50.924 | 15.908 | 0.00 | 0.00 |
| ATOM | 2883 | HZ3  | TRP | 181 | 26.682 | 51.045 | 16.813 | 0.00 | 0.00 |
| ATOM | 2884 | CE3  | TRP | 181 | 28.232 | 51.789 | 15.589 | 0.00 | 0.00 |
| ATOM | 2885 | HE3  | TRP | 181 | 28.494 | 52.565 | 16.253 | 0.00 | 0.00 |
| ATOM | 2886 | CD2  | TRP | 181 | 28.938 | 51.650 | 14.409 | 0.00 | 0.00 |
| ATOM | 2887 | C    | TRP | 181 | 30.434 | 55.802 | 15.299 | 0.00 | 0.00 |
| ATOM | 2888 | O    | TRP | 181 | 29.770 | 55.828 | 16.291 | 0.00 | 0.00 |
| ATOM | 2889 | N    | VAL | 182 | 31.457 | 56.605 | 15.151 | 0.00 | 0.00 |
| ATOM | 2890 | H    | VAL | 182 | 31.941 | 56.561 | 14.307 | 0.00 | 0.00 |
| ATOM | 2891 | CA   | VAL | 182 | 31.886 | 57.568 | 16.157 | 0.00 | 0.00 |
| ATOM | 2892 | HA   | VAL | 182 | 31.901 | 57.071 | 17.093 | 0.00 | 0.00 |
| ATOM | 2893 | CB   | VAL | 182 | 33.279 | 58.066 | 15.895 | 0.00 | 0.00 |
| ATOM | 2894 | HB   | VAL | 182 | 33.429 | 58.555 | 15.459 | 0.00 | 0.00 |
| ATOM | 2895 | CG1  | VAL | 182 | 33.861 | 58.453 | 16.547 | 0.00 | 0.00 |
| ATOM | 2896 | 1HG1 | VAL | 182 | 33.977 | 58.586 | 16.686 | 0.00 | 0.00 |
| ATOM | 2897 | 2HG1 | VAL | 182 | 34.047 | 58.552 | 16.695 | 0.00 | 0.00 |
| ATOM | 2898 | 3HG1 | VAL | 182 | 33.999 | 58.517 | 16.730 | 0.00 | 0.00 |
| ATOM | 2899 | CG2  | VAL | 182 | 33.972 | 57.533 | 15.584 | 0.00 | 0.00 |
| ATOM | 2900 | 1HG2 | VAL | 182 | 34.162 | 57.412 | 15.511 | 0.00 | 0.00 |
| ATOM | 2901 | 2HG2 | VAL | 182 | 34.130 | 57.417 | 15.499 | 0.00 | 0.00 |
| ATOM | 2902 | 3HG2 | VAL | 182 | 34.148 | 57.395 | 15.506 | 0.00 | 0.00 |
| ATOM | 2903 | C    | VAL | 182 | 30.924 | 58.723 | 16.297 | 0.00 | 0.00 |
| ATOM | 2904 | O    | VAL | 182 | 30.705 | 59.205 | 17.329 | 0.00 | 0.00 |
| ATOM | 2905 | N    | ALA | 183 | 30.301 | 59.131 | 15.279 | 0.00 | 0.00 |
| ATOM | 2906 | H    | ALA | 183 | 30.520 | 58.695 | 14.463 | 0.00 | 0.00 |
| ATOM | 2907 | CA   | ALA | 183 | 29.298 | 60.158 | 15.285 | 0.00 | 0.00 |
| ATOM | 2908 | HA   | ALA | 183 | 29.562 | 60.905 | 15.996 | 0.00 | 0.00 |
| ATOM | 2909 | CB   | ALA | 183 | 29.285 | 60.798 | 13.945 | 0.00 | 0.00 |
| ATOM | 2910 | HB1  | ALA | 183 | 29.310 | 61.007 | 13.645 | 0.00 | 0.00 |
| ATOM | 2911 | HB2  | ALA | 183 | 29.312 | 60.906 | 13.598 | 0.00 | 0.00 |
| ATOM | 2912 | HB3  | ALA | 183 | 29.216 | 60.953 | 13.625 | 0.00 | 0.00 |
| ATOM | 2913 | C    | ALA | 183 | 27.937 | 59.644 | 15.672 | 0.00 | 0.00 |
| ATOM | 2914 | O    | ALA | 183 | 27.192 | 60.336 | 16.302 | 0.00 | 0.00 |
| ATOM | 2915 | N    | ALA | 184 | 27.619 | 58.423 | 15.353 | 0.00 | 0.00 |
| ATOM | 2916 | H    | ALA | 184 | 28.246 | 57.922 | 14.795 | 0.00 | 0.00 |
| ATOM | 2917 | CA   | ALA | 184 | 26.376 | 57.808 | 15.692 | 0.00 | 0.00 |
| ATOM | 2918 | HA   | ALA | 184 | 25.599 | 58.473 | 15.425 | 0.00 | 0.00 |
| ATOM | 2919 | CB   | ALA | 184 | 26.228 | 56.559 | 14.873 | 0.00 | 0.00 |
| ATOM | 2920 | HB1  | ALA | 184 | 26.177 | 56.239 | 14.719 | 0.00 | 0.00 |
| ATOM | 2921 | HB2  | ALA | 184 | 26.153 | 56.275 | 14.646 | 0.00 | 0.00 |
| ATOM | 2922 | HB3  | ALA | 184 | 26.235 | 56.259 | 14.662 | 0.00 | 0.00 |
| ATOM | 2923 | C    | ALA | 184 | 26.215 | 57.539 | 17.162 | 0.00 | 0.00 |
| ATOM | 2924 | O    | ALA | 184 | 25.148 | 57.614 | 17.661 | 0.00 | 0.00 |
| ATOM | 2925 | N    | LEU | 185 | 27.264 | 57.287 | 17.868 | 0.00 | 0.00 |
| ATOM | 2926 | H    | LEU | 185 | 28.098 | 57.197 | 17.394 | 0.00 | 0.00 |
| ATOM | 2927 | CA   | LEU | 185 | 27.271 | 57.115 | 19.287 | 0.00 | 0.00 |
| ATOM | 2928 | HA   | LEU | 185 | 26.467 | 56.596 | 19.547 | 0.00 | 0.00 |
| ATOM | 2929 | CB   | LEU | 185 | 28.404 | 56.349 | 19.661 | 0.00 | 0.00 |
| ATOM | 2930 | HB2  | LEU | 185 | 28.500 | 55.677 | 19.163 | 0.00 | 0.00 |
| ATOM | 2931 | HB3  | LEU | 185 | 29.093 | 56.771 | 19.540 | 0.00 | 0.00 |
| ATOM | 2932 | CG   | LEU | 185 | 28.540 | 55.903 | 20.828 | 0.00 | 0.00 |
| ATOM | 2933 | HG   | LEU | 185 | 28.507 | 56.506 | 21.216 | 0.00 | 0.00 |
| ATOM | 2934 | CD1  | LEU | 185 | 27.888 | 55.142 | 21.285 | 0.00 | 0.00 |
| ATOM | 2935 | 1HD1 | LEU | 185 | 27.715 | 54.951 | 21.398 | 0.00 | 0.00 |
| ATOM | 2936 | 2HD1 | LEU | 185 | 27.738 | 54.972 | 21.418 | 0.00 | 0.00 |
| ATOM | 2937 | 3HD1 | LEU | 185 | 27.736 | 54.955 | 21.388 | 0.00 | 0.00 |
| ATOM | 2938 | CD2  | LEU | 185 | 29.435 | 55.363 | 21.059 | 0.00 | 0.00 |
| ATOM | 2939 | 1HD2 | LEU | 185 | 29.657 | 55.238 | 21.110 | 0.00 | 0.00 |
| ATOM | 2940 | 2HD2 | LEU | 185 | 29.640 | 55.227 | 21.117 | 0.00 | 0.00 |
| ATOM | 2941 | 3HD2 | LEU | 185 | 29.662 | 55.240 | 21.132 | 0.00 | 0.00 |
| ATOM | 2942 | C    | LEU | 185 | 27.197 | 58.338 | 20.036 | 0.00 | 0.00 |
| ATOM | 2943 | O    | LEU | 185 | 26.873 | 58.383 | 20.966 | 0.00 | 0.00 |
| ATOM | 2944 | N    | ASN | 186 | 27.462 | 59.330 | 19.635 | 0.00 | 0.00 |
| ATOM | 2945 | H    | ASN | 186 | 27.717 | 59.233 | 18.869 | 0.00 | 0.00 |
| ATOM | 2946 | CA   | ASN | 186 | 27.413 | 60.536 | 20.250 | 0.00 | 0.00 |
| ATOM | 2947 | HA   | ASN | 186 | 27.523 | 60.487 | 21.121 | 0.00 | 0.00 |
| ATOM | 2948 | CB   | ASN | 186 | 28.301 | 61.304 | 19.902 | 0.00 | 0.00 |
| ATOM | 2949 | HB2  | ASN | 186 | 28.965 | 60.949 | 19.900 | 0.00 | 0.00 |
| ATOM | 2950 | HB3  | ASN | 186 | 28.193 | 61.463 | 19.171 | 0.00 | 0.00 |
| ATOM | 2951 | CG   | ASN | 186 | 28.470 | 62.341 | 20.534 | 0.00 | 0.00 |
| ATOM | 2952 | OD1  | ASN | 186 | 28.300 | 62.721 | 20.993 | 0.00 | 0.00 |
| ATOM | 2953 | ND2  | ASN | 186 | 28.807 | 62.830 | 20.583 | 0.00 | 0.00 |
| ATOM | 2954 | 1HD2 | ASN | 186 | 28.919 | 63.509 | 20.998 | 0.00 | 0.00 |
| ATOM | 2955 | 2HD2 | ASN | 186 | 28.957 | 62.530 | 20.210 | 0.00 | 0.00 |
| ATOM | 2956 | C    | ASN | 186 | 26.368 | 61.085 | 20.114 | 0.00 | 0.00 |
| ATOM | 2957 | O    | ASN | 186 | 25.978 | 61.504 | 20.303 | 0.00 | 0.00 |
| ATOM | 2958 | N    | LEU | 187 | 25.914 | 61.088 | 19.796 | 0.00 | 0.00 |
| ATOM | 2959 | H    | LEU | 187 | 26.282 | 60.739 | 19.650 | 0.00 | 0.00 |
| ATOM | 2960 | CA   | LEU | 187 | 24.939 | 61.579 | 19.631 | 0.00 | 0.00 |
| ATOM | 2961 | HA   | LEU | 187 | 24.717 | 61.877 | 19.708 | 0.00 | 0.00 |
| ATOM | 2962 | CB   | LEU | 187 | 24.782 | 61.673 | 19.196 | 0.00 | 0.00 |
| ATOM | 2963 | HB2  | LEU | 187 | 25.150 | 61.471 | 19.080 | 0.00 | 0.00 |
| ATOM | 2964 | HB3  | LEU | 187 | 24.704 | 61.571 | 19.150 | 0.00 | 0.00 |
| ATOM | 2965 | CG   | LEU | 187 | 24.253 | 62.155 | 18.964 | 0.00 | 0.00 |
| ATOM | 2966 | HG   | LEU | 187 | 24.190 | 62.166 | 19.022 | 0.00 | 0.00 |
| ATOM | 2967 | CD1  | LEU | 187 | 24.032 | 62.421 | 18.752 | 0.00 | 0.00 |
| ATOM | 2968 | 1HD1 | LEU | 187 | 23.976 | 62.473 | 18.693 | 0.00 | 0.00 |
| ATOM | 2969 | 2HD1 | LEU | 187 | 23.962 | 62.487 | 18.712 | 0.00 | 0.00 |
| ATOM | 2970 | 3HD1 | LEU | 187 | 23.990 | 62.501 | 18.694 | 0.00 | 0.00 |
| ATOM | 2971 | CD2  | LEU | 187 | 24.016 | 62.369 | 18.843 | 0.00 | 0.00 |
| ATOM | 2972 | 1HD2 | LEU | 187 | 23.953 | 62.408 | 18.800 | 0.00 | 0.00 |
| ATOM | 2973 | 2HD2 | LEU | 187 | 23.973 | 62.384 | 18.844 | 0.00 | 0.00 |
| ATOM | 2974 | 3HD2 | LEU | 187 | 23.947 | 62.475 | 18.797 | 0.00 | 0.00 |
| ATOM | 2975 | C    | LEU | 187 | 24.386 | 61.599 | 19.794 | 0.00 | 0.00 |
| ATOM | 2976 | O    | LEU | 187 | 24.275 | 61.579 | 19.745 | 0.00 | 0.00 |
| END  |      |      |     |     |        |        |        |      |      |

DATASET S5  
 HEADER APOPTOSIS 29-OCT-11 XXXX  
 TITLE 3D MODEL OF BAK IN COMPLEX WITH THE BH3 DOMAIN OF BIM  
 COMPND MOLECULE: APOPTOSIS REGULATOR BAK;  
 COMPND 2 SYNONYM: BCL-2 HOMOLOGOUS ANTAGONIST/KILLER, BCL-2- LIKE 7  
 COMPND 3 PROTEIN;



SOURCE MOLECULE 1 (RESIDUES 1-24): BIM;  
SOURCE 2 NCBI ACCESSION: 043521;  
SOURCE 3 ORGANISM\_SCIENTIFIC: HOMO SAPIENS;  
SOURCE 4 ORGANISM\_COMMON: HUMAN;  
SOURCE 5 MOLECULE 2 (RESIDUES 25-187): BAK;  
SOURCE 6 NCBI ACCESSION: Q16611;  
SOURCE 7 ORGANISM\_SCIENTIFIC: HOMO SAPIENS;  
SOURCE 8 ORGANISM\_COMMON: HUMAN;  
KEYWDS HETERODIMER, APOPTOSIS  
EXPDTA THEORETICAL MODEL  
JRNL AUTH Y-P PANG, H DAI, A SMITH, XW MENG, PA SCHNEIDER, SH KAUFMANN  
JRNL TITL BAK CONFORMATIONAL CHANGES INDUCED BY LIGAND BINDING;  
JRNL TITL 2 INSIGHT INTO BH3 DOMAIN BINDING AND BAK HOMO-OLIGOMERIZATION  
JRNL REF SCIENTIFIC REPORTS, SUBMITTED  
REMARK 220 THIS IS AN ENERGY-MINIMIZED AVERAGE OF 19,500 SIMILAR  
REMARK 220 CONFORMERS IDENTIFIED BY CLUSTER ANALYSIS OF 80  
REMARK 220 10-NS MOLECULAR DYNAMICS SIMULATIONS OF  
REMARK 220 BAK\*BIM USING PMEMD WITH THE FF99SB FORCE FIELD.

MOL 1  
ATOM 1 N ARG 1 5.821 30.687 14.155  
ATOM 2 H ARG 1 5.923 29.714 13.881  
ATOM 3 CA ARG 1 4.723 31.056 15.032  
ATOM 4 HA ARG 1 4.268 30.120 15.337  
ATOM 5 CB ARG 1 3.762 31.948 14.238  
ATOM 6 2HB ARG 1 3.255 32.640 14.933  
ATOM 7 3HB ARG 1 4.364 32.571 13.556  
ATOM 8 CG ARG 1 2.724 31.140 13.448  
ATOM 9 2HG ARG 1 3.259 30.636 12.644  
ATOM 10 3HG ARG 1 2.273 30.415 14.114  
ATOM 11 CD ARG 1 1.683 32.158 12.930  
ATOM 12 2HD ARG 1 1.276 32.685 13.791  
ATOM 13 3HD ARG 1 2.200 32.886 12.299  
ATOM 14 NE ARG 1 0.535 31.635 12.174  
ATOM 15 HE ARG 1 -0.365 31.993 12.446  
ATOM 16 CZ ARG 1 0.625 31.392 10.878  
ATOM 17 NH1 ARG 1 -0.070 32.118 10.042  
ATOM 18 1HH1 ARG 1 -0.555 32.936 10.397  
ATOM 19 2HH1 ARG 1 0.012 31.995 9.058  
ATOM 20 NH2 ARG 1 1.410 30.463 10.462  
ATOM 21 1HH2 ARG 1 1.833 29.886 11.167  
ATOM 22 2HH2 ARG 1 1.443 30.182 9.489  
ATOM 23 C ARG 1 5.116 31.846 16.297  
ATOM 24 O ARG 1 5.672 32.923 16.162  
ATOM 25 N PRO 2 4.822 31.350 17.516  
ATOM 26 CD PRO 2 3.857 30.307 17.832  
ATOM 27 2HD PRO 2 4.280 29.323 17.594  
ATOM 28 3HD PRO 2 2.928 30.471 17.270  
ATOM 29 CG PRO 2 3.601 30.412 19.336  
ATOM 30 2HG PRO 2 3.367 29.439 19.753  
ATOM 31 3HG PRO 2 2.800 31.122 19.530  
ATOM 32 CB PRO 2 4.939 30.941 19.845  
ATOM 33 2HB PRO 2 4.857 31.430 20.816  
ATOM 34 3HB PRO 2 5.648 30.114 19.892  
ATOM 35 CA PRO 2 5.385 31.918 18.748  
ATOM 36 HA PRO 2 4.932 32.897 18.912  
ATOM 37 C PRO 2 6.910 32.102 18.697  
ATOM 38 O PRO 2 7.473 32.969 19.360  
ATOM 39 N GLU 3 7.606 31.315 17.864  
ATOM 40 H GLU 3 7.112 30.565 17.398  
ATOM 41 CA GLU 3 9.015 31.452 17.556  
ATOM 42 HA GLU 3 9.541 31.729 18.471  
ATOM 43 CB GLU 3 9.533 30.080 17.106  
ATOM 44 2HB GLU 3 10.621 30.092 17.062  
ATOM 45 3HB GLU 3 9.225 29.358 17.862  
ATOM 46 CG GLU 3 8.956 29.703 15.729  
ATOM 47 2HG GLU 3 7.960 30.130 15.627  
ATOM 48 3HG GLU 3 9.582 30.145 14.954  
ATOM 49 CD GLU 3 8.823 28.201 15.494  
ATOM 50 OE1 GLU 3 9.646 27.441 16.044  
ATOM 51 OE2 GLU 3 7.867 27.848 14.767  
ATOM 52 C GLU 3 9.374 32.576 16.540  
ATOM 53 O GLU 3 10.538 32.964 16.501  
ATOM 54 N ILE 4 8.431 33.122 15.768  
ATOM 55 H ILE 4 7.489 32.737 15.788  
ATOM 56 CA ILE 4 8.626 34.337 14.953  
ATOM 57 HA ILE 4 9.697 34.474 14.776  
ATOM 58 CB ILE 4 7.869 34.269 13.600  
ATOM 59 HB ILE 4 6.823 34.453 13.847  
ATOM 60 CG2 ILE 4 8.350 35.447 12.754  
ATOM 61 1HG2 ILE 4 7.861 36.351 13.107  
ATOM 62 2HG2 ILE 4 9.438 35.560 12.853  
ATOM 63 3HG2 ILE 4 8.106 35.313 11.702  
ATOM 64 CG1 ILE 4 7.847 32.935 12.829  
ATOM 65 2HG1 ILE 4 8.036 32.097 13.501  
ATOM 66 3HG1 ILE 4 6.828 32.815 12.454  
ATOM 67 CD1 ILE 4 8.774 32.770 11.630  
ATOM 68 1HD1 ILE 4 8.870 31.715 11.414  
ATOM 69 2HD1 ILE 4 9.755 33.195 11.851  
ATOM 70 3HD1 ILE 4 8.334 33.273 10.761  
ATOM 71 C ILE 4 8.138 35.574 15.709  
ATOM 72 O ILE 4 8.744 36.632 15.612  
ATOM 73 N TRP 5 7.014 35.477 16.425  
ATOM 74 H TRP 5 6.526 34.583 16.419  
ATOM 75 CA TRP 5 6.351 36.630 17.049  
ATOM 76 HA TRP 5 6.138 37.359 16.270  
ATOM 77 CB TRP 5 5.031 36.192 17.679  
ATOM 78 2HB TRP 5 5.227 35.393 18.396  
ATOM 79 3HB TRP 5 4.633 37.040 18.232  
ATOM 80 CG TRP 5 3.953 35.745 16.743  
ATOM 81 CD1 TRP 5 3.804 36.106 15.451  
ATOM 82 HD1 TRP 5 4.475 36.751 14.898  
ATOM 83 NE1 TRP 5 2.627 35.579 14.953  
ATOM 84 HE1 TRP 5 2.274 35.787 14.032  
ATOM 85 CE2 TRP 5 1.961 34.863 15.912  
ATOM 86 CZ2 TRP 5 0.723 34.195 15.907

|      |     |      |     |    |        |        |        |
|------|-----|------|-----|----|--------|--------|--------|
| ATOM | 87  | HZ2  | TRP | 5  | 0.097  | 34.232 | 15.031 |
| ATOM | 88  | CH2  | TRP | 5  | 0.312  | 33.521 | 17.062 |
| ATOM | 89  | HH2  | TRP | 5  | -0.645 | 33.011 | 17.081 |
| ATOM | 90  | CZ3  | TRP | 5  | 1.117  | 33.536 | 18.216 |
| ATOM | 91  | HZ3  | TRP | 5  | 0.777  | 33.041 | 19.113 |
| ATOM | 92  | CE3  | TRP | 5  | 2.345  | 34.238 | 18.218 |
| ATOM | 93  | HE3  | TRP | 5  | 2.926  | 34.284 | 19.129 |
| ATOM | 94  | CD2  | TRP | 5  | 2.792  | 34.911 | 17.068 |
| ATOM | 95  | C    | TRP | 5  | 7.216  | 37.365 | 18.078 |
| ATOM | 96  | O    | TRP | 5  | 7.053  | 38.567 | 18.269 |
| ATOM | 97  | N    | ILE | 6  | 8.201  | 36.677 | 18.651 |
| ATOM | 98  | H    | ILE | 6  | 8.223  | 35.681 | 18.472 |
| ATOM | 99  | CA   | ILE | 6  | 9.309  | 37.217 | 19.446 |
| ATOM | 100 | HA   | ILE | 6  | 8.891  | 37.684 | 20.340 |
| ATOM | 101 | CB   | ILE | 6  | 10.120 | 35.974 | 19.881 |
| ATOM | 102 | HB   | ILE | 6  | 9.386  | 35.227 | 20.200 |
| ATOM | 103 | CG2  | ILE | 6  | 10.885 | 35.337 | 18.709 |
| ATOM | 104 | 1HG2 | ILE | 6  | 10.790 | 34.254 | 18.791 |
| ATOM | 105 | 2HG2 | ILE | 6  | 10.484 | 35.646 | 17.745 |
| ATOM | 106 | 3HG2 | ILE | 6  | 11.942 | 35.603 | 18.742 |
| ATOM | 107 | CG1  | ILE | 6  | 11.053 | 36.194 | 21.081 |
| ATOM | 108 | 2HG1 | ILE | 6  | 11.913 | 35.533 | 20.989 |
| ATOM | 109 | 3HG1 | ILE | 6  | 11.392 | 37.229 | 21.105 |
| ATOM | 110 | CD1  | ILE | 6  | 10.391 | 35.839 | 22.411 |
| ATOM | 111 | 1HD1 | ILE | 6  | 10.232 | 34.760 | 22.454 |
| ATOM | 112 | 2HD1 | ILE | 6  | 11.051 | 36.130 | 23.225 |
| ATOM | 113 | 3HD1 | ILE | 6  | 9.437  | 36.356 | 22.506 |
| ATOM | 114 | C    | ILE | 6  | 10.134 | 38.312 | 18.707 |
| ATOM | 115 | O    | ILE | 6  | 10.804 | 39.116 | 19.348 |
| ATOM | 116 | N    | ALA | 7  | 10.012 | 38.444 | 17.377 |
| ATOM | 117 | H    | ALA | 7  | 9.505  | 37.726 | 16.874 |
| ATOM | 118 | CA   | ALA | 7  | 10.467 | 39.597 | 16.588 |
| ATOM | 119 | HA   | ALA | 7  | 11.531 | 39.756 | 16.767 |
| ATOM | 120 | CB   | ALA | 7  | 10.259 | 39.290 | 15.101 |
| ATOM | 121 | 1HB  | ALA | 7  | 10.589 | 40.140 | 14.504 |
| ATOM | 122 | 2HB  | ALA | 7  | 10.830 | 38.411 | 14.813 |
| ATOM | 123 | 3HB  | ALA | 7  | 9.202  | 39.111 | 14.898 |
| ATOM | 124 | C    | ALA | 7  | 9.731  | 40.905 | 16.930 |
| ATOM | 125 | O    | ALA | 7  | 10.342 | 41.973 | 16.935 |
| ATOM | 126 | N    | GLN | 8  | 8.430  | 40.856 | 17.248 |
| ATOM | 127 | H    | GLN | 8  | 7.979  | 39.952 | 17.339 |
| ATOM | 128 | CA   | GLN | 8  | 7.718  | 42.040 | 17.745 |
| ATOM | 129 | HA   | GLN | 8  | 7.907  | 42.875 | 17.071 |
| ATOM | 130 | CB   | GLN | 8  | 6.202  | 41.807 | 17.810 |
| ATOM | 131 | 2HB  | GLN | 8  | 5.974  | 40.985 | 18.492 |
| ATOM | 132 | 3HB  | GLN | 8  | 5.745  | 42.714 | 18.209 |
| ATOM | 133 | CG   | GLN | 8  | 5.603  | 41.503 | 16.431 |
| ATOM | 134 | 2HG  | GLN | 8  | 6.020  | 42.185 | 15.690 |
| ATOM | 135 | 3HG  | GLN | 8  | 5.870  | 40.485 | 16.145 |
| ATOM | 136 | CD   | GLN | 8  | 4.089  | 41.653 | 16.389 |
| ATOM | 137 | OE1  | GLN | 8  | 3.457  | 42.329 | 17.182 |
| ATOM | 138 | NE2  | GLN | 8  | 3.448  | 41.095 | 15.389 |
| ATOM | 139 | 1HE2 | GLN | 8  | 2.456  | 41.236 | 15.373 |
| ATOM | 140 | 2HE2 | GLN | 8  | 3.954  | 40.599 | 14.681 |
| ATOM | 141 | C    | GLN | 8  | 8.256  | 42.459 | 19.113 |
| ATOM | 142 | O    | GLN | 8  | 8.344  | 43.656 | 19.375 |
| ATOM | 143 | N    | GLU | 9  | 8.691  | 41.491 | 19.919 |
| ATOM | 144 | H    | GLU | 9  | 8.546  | 40.534 | 19.640 |
| ATOM | 145 | CA   | GLU | 9  | 9.321  | 41.719 | 21.215 |
| ATOM | 146 | HA   | GLU | 9  | 8.728  | 42.459 | 21.742 |
| ATOM | 147 | CB   | GLU | 9  | 9.319  | 40.384 | 21.987 |
| ATOM | 148 | 2HB  | GLU | 9  | 8.548  | 39.724 | 21.583 |
| ATOM | 149 | 3HB  | GLU | 9  | 10.278 | 39.893 | 21.833 |
| ATOM | 150 | CG   | GLU | 9  | 9.086  | 40.501 | 23.494 |
| ATOM | 151 | 2HG  | GLU | 9  | 9.215  | 39.502 | 23.915 |
| ATOM | 152 | 3HG  | GLU | 9  | 9.854  | 41.152 | 23.914 |
| ATOM | 153 | CD   | GLU | 9  | 7.691  | 41.014 | 23.884 |
| ATOM | 154 | OE1  | GLU | 9  | 7.181  | 41.993 | 23.277 |
| ATOM | 155 | OE2  | GLU | 9  | 7.128  | 40.580 | 24.896 |
| ATOM | 156 | C    | GLU | 9  | 10.715 | 42.343 | 21.072 |
| ATOM | 157 | O    | GLU | 9  | 10.976 | 43.389 | 21.659 |
| ATOM | 158 | N    | LEU | 10 | 11.556 | 41.806 | 20.178 |
| ATOM | 159 | H    | LEU | 10 | 11.299 | 40.907 | 19.780 |
| ATOM | 160 | CA   | LEU | 10 | 12.836 | 42.402 | 19.769 |
| ATOM | 161 | HA   | LEU | 10 | 13.500 | 42.417 | 20.631 |
| ATOM | 162 | CB   | LEU | 10 | 13.434 | 41.483 | 18.686 |
| ATOM | 163 | 2HB  | LEU | 10 | 13.510 | 40.471 | 19.086 |
| ATOM | 164 | 3HB  | LEU | 10 | 12.747 | 41.454 | 17.840 |
| ATOM | 165 | CG   | LEU | 10 | 14.812 | 41.917 | 18.162 |
| ATOM | 166 | HG   | LEU | 10 | 14.724 | 42.896 | 17.695 |
| ATOM | 167 | CD1  | LEU | 10 | 15.865 | 41.987 | 19.267 |
| ATOM | 168 | 1HD1 | LEU | 10 | 15.626 | 42.795 | 19.957 |
| ATOM | 169 | 2HD1 | LEU | 10 | 15.894 | 41.046 | 19.816 |
| ATOM | 170 | 3HD1 | LEU | 10 | 16.846 | 42.180 | 18.834 |
| ATOM | 171 | CD2  | LEU | 10 | 15.293 | 40.922 | 17.107 |
| ATOM | 172 | 1HD2 | LEU | 10 | 14.498 | 40.723 | 16.388 |
| ATOM | 173 | 2HD2 | LEU | 10 | 16.152 | 41.337 | 16.584 |
| ATOM | 174 | 3HD2 | LEU | 10 | 15.588 | 39.993 | 17.594 |
| ATOM | 175 | C    | LEU | 10 | 12.681 | 43.852 | 19.262 |
| ATOM | 176 | O    | LEU | 10 | 13.500 | 44.723 | 19.558 |
| ATOM | 177 | N    | ARG | 11 | 11.609 | 44.122 | 18.510 |
| ATOM | 178 | H    | ARG | 11 | 11.017 | 43.335 | 18.263 |
| ATOM | 179 | CA   | ARG | 11 | 11.280 | 45.443 | 17.955 |
| ATOM | 180 | HA   | ARG | 11 | 12.199 | 45.910 | 17.606 |
| ATOM | 181 | CB   | ARG | 11 | 10.358 | 45.201 | 16.748 |
| ATOM | 182 | 2HB  | ARG | 11 | 10.803 | 44.395 | 16.163 |
| ATOM | 183 | 3HB  | ARG | 11 | 9.393  | 44.833 | 17.103 |
| ATOM | 184 | CG   | ARG | 11 | 10.188 | 46.375 | 15.766 |
| ATOM | 185 | 2HG  | ARG | 11 | 11.108 | 46.955 | 15.722 |
| ATOM | 186 | 3HG  | ARG | 11 | 10.011 | 45.955 | 14.775 |
| ATOM | 187 | CD   | ARG | 11 | 9.029  | 47.323 | 16.066 |
| ATOM | 188 | 2HD  | ARG | 11 | 9.258  | 47.897 | 16.967 |
| ATOM | 189 | 3HD  | ARG | 11 | 8.926  | 48.009 | 15.227 |
| ATOM | 190 | NE   | ARG | 11 | 7.757  | 46.601 | 16.210 |
| ATOM | 191 | HE   | ARG | 11 | 7.697  | 45.700 | 15.765 |

|      |     |      |     |    |        |        |        |
|------|-----|------|-----|----|--------|--------|--------|
| ATOM | 192 | CZ   | ARG | 11 | 6.733  | 47.004 | 16.934 |
| ATOM | 193 | NH1  | ARG | 11 | 6.706  | 48.173 | 17.512 |
| ATOM | 194 | 1HH1 | ARG | 11 | 7.542  | 48.753 | 17.503 |
| ATOM | 195 | 2HH1 | ARG | 11 | 5.916  | 48.463 | 18.052 |
| ATOM | 196 | NH2  | ARG | 11 | 5.695  | 46.225 | 17.072 |
| ATOM | 197 | 1HH2 | ARG | 11 | 5.714  | 45.292 | 16.703 |
| ATOM | 198 | 2HH2 | ARG | 11 | 4.935  | 46.511 | 17.657 |
| ATOM | 199 | C    | ARG | 11 | 10.727 | 46.401 | 19.014 |
| ATOM | 200 | O    | ARG | 11 | 11.007 | 47.591 | 18.941 |
| ATOM | 201 | N    | ARG | 12 | 10.007 | 45.890 | 20.019 |
| ATOM | 202 | H    | ARG | 12 | 9.822  | 44.893 | 20.000 |
| ATOM | 203 | CA   | ARG | 12 | 9.474  | 46.651 | 21.159 |
| ATOM | 204 | HA   | ARG | 12 | 9.059  | 47.595 | 20.796 |
| ATOM | 205 | CB   | ARG | 12 | 8.354  | 45.824 | 21.809 |
| ATOM | 206 | 2HB  | ARG | 12 | 7.666  | 45.507 | 21.026 |
| ATOM | 207 | 3HB  | ARG | 12 | 8.784  | 44.936 | 22.274 |
| ATOM | 208 | CG   | ARG | 12 | 7.547  | 46.607 | 22.854 |
| ATOM | 209 | 2HG  | ARG | 12 | 8.172  | 46.845 | 23.716 |
| ATOM | 210 | 3HG  | ARG | 12 | 7.200  | 47.539 | 22.407 |
| ATOM | 211 | CD   | ARG | 12 | 6.315  | 45.809 | 23.313 |
| ATOM | 212 | 2HD  | ARG | 12 | 5.715  | 46.437 | 23.971 |
| ATOM | 213 | 3HD  | ARG | 12 | 5.702  | 45.571 | 22.441 |
| ATOM | 214 | NE   | ARG | 12 | 6.648  | 44.561 | 24.017 |
| ATOM | 215 | HE   | ARG | 12 | 6.680  | 43.682 | 23.481 |
| ATOM | 216 | CZ   | ARG | 12 | 6.808  | 44.380 | 25.311 |
| ATOM | 217 | NH1  | ARG | 12 | 6.853  | 45.371 | 26.159 |
| ATOM | 218 | 1HH1 | ARG | 12 | 6.782  | 46.307 | 25.820 |
| ATOM | 219 | 2HH1 | ARG | 12 | 6.863  | 45.153 | 27.133 |
| ATOM | 220 | NH2  | ARG | 12 | 6.887  | 43.185 | 25.795 |
| ATOM | 221 | 1HH2 | ARG | 12 | 6.842  | 42.386 | 25.140 |
| ATOM | 222 | 2HH2 | ARG | 12 | 7.104  | 42.959 | 26.740 |
| ATOM | 223 | C    | ARG | 12 | 10.570 | 47.029 | 22.153 |
| ATOM | 224 | O    | ARG | 12 | 10.622 | 48.189 | 22.547 |
| ATOM | 225 | N    | ILE | 13 | 11.478 | 46.109 | 22.492 |
| ATOM | 226 | H    | ILE | 13 | 11.363 | 45.153 | 22.164 |
| ATOM | 227 | CA   | ILE | 13 | 12.630 | 46.446 | 23.339 |
| ATOM | 228 | HA   | ILE | 13 | 12.247 | 47.011 | 24.187 |
| ATOM | 229 | CB   | ILE | 13 | 13.349 | 45.218 | 23.931 |
| ATOM | 230 | HB   | ILE | 13 | 14.125 | 45.614 | 24.575 |
| ATOM | 231 | CG2  | ILE | 13 | 12.379 | 44.407 | 24.807 |
| ATOM | 232 | 1HG2 | ILE | 13 | 11.780 | 43.744 | 24.182 |
| ATOM | 233 | 2HG2 | ILE | 13 | 12.941 | 43.798 | 25.520 |
| ATOM | 234 | 3HG2 | ILE | 13 | 11.723 | 45.071 | 25.364 |
| ATOM | 235 | CG1  | ILE | 13 | 14.078 | 44.337 | 22.895 |
| ATOM | 236 | 2HG1 | ILE | 13 | 13.358 | 43.989 | 22.162 |
| ATOM | 237 | 3HG1 | ILE | 13 | 14.835 | 44.933 | 22.376 |
| ATOM | 238 | CD1  | ILE | 13 | 14.778 | 43.106 | 23.494 |
| ATOM | 239 | 1HD1 | ILE | 13 | 15.431 | 43.400 | 24.317 |
| ATOM | 240 | 2HD1 | ILE | 13 | 14.033 | 42.395 | 23.853 |
| ATOM | 241 | 3HD1 | ILE | 13 | 15.379 | 42.622 | 22.724 |
| ATOM | 242 | C    | ILE | 13 | 13.603 | 47.393 | 22.638 |
| ATOM | 243 | O    | ILE | 13 | 14.156 | 48.260 | 23.300 |
| ATOM | 244 | N    | GLY | 14 | 13.743 | 47.305 | 21.308 |
| ATOM | 245 | H    | GLY | 14 | 13.337 | 46.507 | 20.834 |
| ATOM | 246 | CA   | GLY | 14 | 14.483 | 48.285 | 20.506 |
| ATOM | 247 | 2HA  | GLY | 14 | 15.508 | 48.350 | 20.874 |
| ATOM | 248 | 3HA  | GLY | 14 | 14.512 | 47.936 | 19.474 |
| ATOM | 249 | C    | GLY | 14 | 13.873 | 49.697 | 20.513 |
| ATOM | 250 | O    | GLY | 14 | 14.611 | 50.677 | 20.434 |
| ATOM | 251 | N    | ASP | 15 | 12.550 | 49.826 | 20.645 |
| ATOM | 252 | H    | ASP | 15 | 11.979 | 48.994 | 20.689 |
| ATOM | 253 | CA   | ASP | 15 | 11.875 | 51.127 | 20.747 |
| ATOM | 254 | HA   | ASP | 15 | 12.419 | 51.852 | 20.136 |
| ATOM | 255 | CB   | ASP | 15 | 10.441 | 51.034 | 20.185 |
| ATOM | 256 | 2HB  | ASP | 15 | 9.919  | 50.214 | 20.681 |
| ATOM | 257 | 3HB  | ASP | 15 | 9.917  | 51.959 | 20.437 |
| ATOM | 258 | CG   | ASP | 15 | 10.373 | 50.851 | 18.658 |
| ATOM | 259 | OD1  | ASP | 15 | 11.271 | 51.343 | 17.932 |
| ATOM | 260 | OD2  | ASP | 15 | 9.388  | 50.265 | 18.139 |
| ATOM | 261 | C    | ASP | 15 | 11.914 | 51.692 | 22.187 |
| ATOM | 262 | O    | ASP | 15 | 12.183 | 52.885 | 22.354 |
| ATOM | 263 | N    | GLU | 16 | 11.767 | 50.849 | 23.225 |
| ATOM | 264 | H    | GLU | 16 | 11.499 | 49.894 | 23.022 |
| ATOM | 265 | CA   | GLU | 16 | 12.075 | 51.225 | 24.629 |
| ATOM | 266 | HA   | GLU | 16 | 11.391 | 52.002 | 24.969 |
| ATOM | 267 | CB   | GLU | 16 | 11.967 | 50.014 | 25.579 |
| ATOM | 268 | 2HB  | GLU | 16 | 12.473 | 49.157 | 25.105 |
| ATOM | 269 | 3HB  | GLU | 16 | 12.473 | 50.246 | 26.513 |
| ATOM | 270 | CG   | GLU | 16 | 10.543 | 49.575 | 25.907 |
| ATOM | 271 | 2HG  | GLU | 16 | 9.846  | 49.886 | 25.128 |
| ATOM | 272 | 3HG  | GLU | 16 | 10.585 | 48.511 | 25.839 |
| ATOM | 273 | CD   | GLU | 16 | 10.049 | 49.844 | 27.337 |
| ATOM | 274 | OE1  | GLU | 16 | 10.169 | 51.007 | 27.779 |
| ATOM | 275 | OE2  | GLU | 16 | 9.529  | 48.889 | 27.983 |
| ATOM | 276 | C    | GLU | 16 | 13.509 | 51.774 | 24.744 |
| ATOM | 277 | O    | GLU | 16 | 13.750 | 52.813 | 25.362 |
| ATOM | 278 | N    | PHE | 17 | 14.468 | 51.094 | 24.103 |
| ATOM | 279 | H    | PHE | 17 | 14.224 | 50.195 | 23.692 |
| ATOM | 280 | CA   | PHE | 17 | 15.870 | 51.506 | 23.996 |
| ATOM | 281 | HA   | PHE | 17 | 16.317 | 51.493 | 24.994 |
| ATOM | 282 | CB   | PHE | 17 | 16.600 | 50.519 | 23.077 |
| ATOM | 283 | 2HB  | PHE | 17 | 15.936 | 49.733 | 22.746 |
| ATOM | 284 | 3HB  | PHE | 17 | 16.922 | 51.023 | 22.175 |
| ATOM | 285 | CG   | PHE | 17 | 17.798 | 49.891 | 23.708 |
| ATOM | 286 | CD1  | PHE | 17 | 17.618 | 48.792 | 24.560 |
| ATOM | 287 | HD1  | PHE | 17 | 16.622 | 48.423 | 24.775 |
| ATOM | 288 | CE1  | PHE | 17 | 18.740 | 48.174 | 25.127 |
| ATOM | 289 | HE1  | PHE | 17 | 18.592 | 47.323 | 25.772 |
| ATOM | 290 | CZ   | PHE | 17 | 20.029 | 48.665 | 24.849 |
| ATOM | 291 | HZ   | PHE | 17 | 20.898 | 48.189 | 25.272 |
| ATOM | 292 | CE2  | PHE | 17 | 20.196 | 49.785 | 24.020 |
| ATOM | 293 | HE2  | PHE | 17 | 21.183 | 50.171 | 23.826 |
| ATOM | 294 | CD2  | PHE | 17 | 19.079 | 50.398 | 23.437 |
| ATOM | 295 | HD2  | PHE | 17 | 19.206 | 51.254 | 22.788 |
| ATOM | 296 | C    | PHE | 17 | 16.057 | 52.897 | 23.392 |

|      |     |      |     |    |        |        |        |
|------|-----|------|-----|----|--------|--------|--------|
| ATOM | 297 | O    | PHE | 17 | 16.844 | 53.703 | 23.887 |
| ATOM | 298 | N    | ASN | 18 | 15.343 | 53.179 | 22.302 |
| ATOM | 299 | H    | ASN | 18 | 14.725 | 52.465 | 21.936 |
| ATOM | 300 | CA   | ASN | 18 | 15.427 | 54.453 | 21.602 |
| ATOM | 301 | HA   | ASN | 18 | 16.477 | 54.665 | 21.394 |
| ATOM | 302 | CB   | ASN | 18 | 14.694 | 54.275 | 20.262 |
| ATOM | 303 | 2HB  | ASN | 18 | 14.976 | 53.324 | 19.811 |
| ATOM | 304 | 3HB  | ASN | 18 | 13.617 | 54.256 | 20.426 |
| ATOM | 305 | CG   | ASN | 18 | 15.061 | 55.353 | 19.268 |
| ATOM | 306 | OD1  | ASN | 18 | 16.163 | 55.388 | 18.739 |
| ATOM | 307 | ND2  | ASN | 18 | 14.146 | 56.242 | 18.965 |
| ATOM | 308 | 1HD2 | ASN | 18 | 14.413 | 56.991 | 18.356 |
| ATOM | 309 | 2HD2 | ASN | 18 | 13.249 | 56.208 | 19.416 |
| ATOM | 310 | C    | ASN | 18 | 14.894 | 55.600 | 22.493 |
| ATOM | 311 | O    | ASN | 18 | 15.456 | 56.694 | 22.490 |
| ATOM | 312 | N    | ALA | 19 | 13.883 | 55.317 | 23.327 |
| ATOM | 313 | H    | ALA | 19 | 13.463 | 54.395 | 23.253 |
| ATOM | 314 | CA   | ALA | 19 | 13.350 | 56.220 | 24.355 |
| ATOM | 315 | HA   | ALA | 19 | 13.212 | 57.204 | 23.904 |
| ATOM | 316 | CB   | ALA | 19 | 11.972 | 55.695 | 24.801 |
| ATOM | 317 | 1HB  | ALA | 19 | 12.003 | 55.373 | 25.843 |
| ATOM | 318 | 2HB  | ALA | 19 | 11.231 | 56.487 | 24.697 |
| ATOM | 319 | 3HB  | ALA | 19 | 11.657 | 54.842 | 24.197 |
| ATOM | 320 | C    | ALA | 19 | 14.288 | 56.399 | 25.568 |
| ATOM | 321 | O    | ALA | 19 | 14.392 | 57.497 | 26.117 |
| ATOM | 322 | N    | TYR | 20 | 14.972 | 55.333 | 25.995 |
| ATOM | 323 | H    | TYR | 20 | 14.760 | 54.434 | 25.566 |
| ATOM | 324 | CA   | TYR | 20 | 16.006 | 55.364 | 27.036 |
| ATOM | 325 | HA   | TYR | 20 | 15.604 | 55.813 | 27.942 |
| ATOM | 326 | CB   | TYR | 20 | 16.413 | 53.913 | 27.358 |
| ATOM | 327 | 2HB  | TYR | 20 | 15.572 | 53.392 | 27.819 |
| ATOM | 328 | 3HB  | TYR | 20 | 16.634 | 53.391 | 26.428 |
| ATOM | 329 | CG   | TYR | 20 | 17.633 | 53.788 | 28.246 |
| ATOM | 330 | CD1  | TYR | 20 | 17.507 | 53.671 | 29.647 |
| ATOM | 331 | HD1  | TYR | 20 | 16.532 | 53.609 | 30.106 |
| ATOM | 332 | CE1  | TYR | 20 | 18.664 | 53.602 | 30.449 |
| ATOM | 333 | HE1  | TYR | 20 | 18.600 | 53.493 | 31.523 |
| ATOM | 334 | CZ   | TYR | 20 | 19.933 | 53.671 | 29.839 |
| ATOM | 335 | OH   | TYR | 20 | 21.062 | 53.691 | 30.573 |
| ATOM | 336 | HH   | TYR | 20 | 20.969 | 53.264 | 31.459 |
| ATOM | 337 | CE2  | TYR | 20 | 20.057 | 53.763 | 28.442 |
| ATOM | 338 | HE2  | TYR | 20 | 21.041 | 53.768 | 28.001 |
| ATOM | 339 | CD2  | TYR | 20 | 18.906 | 53.793 | 27.643 |
| ATOM | 340 | HD2  | TYR | 20 | 18.999 | 53.813 | 26.567 |
| ATOM | 341 | C    | TYR | 20 | 17.206 | 56.220 | 26.597 |
| ATOM | 342 | O    | TYR | 20 | 17.644 | 57.116 | 27.322 |
| ATOM | 343 | N    | TYR | 21 | 17.693 | 55.992 | 25.375 |
| ATOM | 344 | H    | TYR | 21 | 17.282 | 55.233 | 24.838 |
| ATOM | 345 | CA   | TYR | 21 | 18.828 | 56.693 | 24.776 |
| ATOM | 346 | HA   | TYR | 21 | 19.695 | 56.595 | 25.430 |
| ATOM | 347 | CB   | TYR | 21 | 19.130 | 55.983 | 23.449 |
| ATOM | 348 | 2HB  | TYR | 21 | 19.264 | 54.918 | 23.643 |
| ATOM | 349 | 3HB  | TYR | 21 | 18.267 | 56.085 | 22.788 |
| ATOM | 350 | CG   | TYR | 21 | 20.361 | 56.470 | 22.722 |
| ATOM | 351 | CD1  | TYR | 21 | 21.643 | 56.045 | 23.129 |
| ATOM | 352 | HD1  | TYR | 21 | 21.745 | 55.391 | 23.984 |
| ATOM | 353 | CE1  | TYR | 21 | 22.786 | 56.475 | 22.423 |
| ATOM | 354 | HE1  | TYR | 21 | 23.771 | 56.160 | 22.729 |
| ATOM | 355 | CZ   | TYR | 21 | 22.637 | 57.321 | 21.299 |
| ATOM | 356 | OH   | TYR | 21 | 23.713 | 57.751 | 20.593 |
| ATOM | 357 | HH   | TYR | 21 | 24.573 | 57.504 | 20.955 |
| ATOM | 358 | CE2  | TYR | 21 | 21.349 | 57.718 | 20.885 |
| ATOM | 359 | HE2  | TYR | 21 | 21.252 | 58.358 | 20.022 |
| ATOM | 360 | CD2  | TYR | 21 | 20.212 | 57.308 | 21.603 |
| ATOM | 361 | HD2  | TYR | 21 | 19.230 | 57.635 | 21.291 |
| ATOM | 362 | C    | TYR | 21 | 18.564 | 58.197 | 24.590 |
| ATOM | 363 | O    | TYR | 21 | 19.423 | 59.016 | 24.903 |
| ATOM | 364 | N    | ALA | 22 | 17.350 | 58.585 | 24.185 |
| ATOM | 365 | H    | ALA | 22 | 16.685 | 57.876 | 23.896 |
| ATOM | 366 | CA   | ALA | 22 | 16.989 | 59.988 | 23.964 |
| ATOM | 367 | HA   | ALA | 22 | 17.697 | 60.409 | 23.246 |
| ATOM | 368 | CB   | ALA | 22 | 15.586 | 60.030 | 23.343 |
| ATOM | 369 | 1HB  | ALA | 22 | 15.676 | 60.221 | 22.273 |
| ATOM | 370 | 2HB  | ALA | 22 | 15.059 | 59.088 | 23.496 |
| ATOM | 371 | 3HB  | ALA | 22 | 14.995 | 60.829 | 23.794 |
| ATOM | 372 | C    | ALA | 22 | 17.066 | 60.884 | 25.220 |
| ATOM | 373 | O    | ALA | 22 | 17.200 | 62.099 | 25.101 |
| ATOM | 374 | N    | ARG | 23 | 17.006 | 60.315 | 26.433 |
| ATOM | 375 | H    | ARG | 23 | 16.936 | 59.305 | 26.468 |
| ATOM | 376 | CA   | ARG | 23 | 17.058 | 61.083 | 27.696 |
| ATOM | 377 | HA   | ARG | 23 | 16.537 | 62.031 | 27.547 |
| ATOM | 378 | CB   | ARG | 23 | 16.371 | 60.292 | 28.823 |
| ATOM | 379 | 2HB  | ARG | 23 | 16.814 | 59.298 | 28.900 |
| ATOM | 380 | 3HB  | ARG | 23 | 16.538 | 60.811 | 29.769 |
| ATOM | 381 | CG   | ARG | 23 | 14.864 | 60.176 | 28.603 |
| ATOM | 382 | ZHG  | ARG | 23 | 14.483 | 61.147 | 28.284 |
| ATOM | 383 | ZHG  | ARG | 23 | 14.671 | 59.448 | 27.817 |
| ATOM | 384 | CD   | ARG | 23 | 14.131 | 59.774 | 29.897 |
| ATOM | 385 | ZHD  | ARG | 23 | 14.532 | 60.368 | 30.723 |
| ATOM | 386 | ZHD  | ARG | 23 | 13.077 | 60.046 | 29.798 |
| ATOM | 387 | NE   | ARG | 23 | 14.229 | 58.346 | 30.237 |
| ATOM | 388 | HE   | ARG | 23 | 14.810 | 58.108 | 31.031 |
| ATOM | 389 | CZ   | ARG | 23 | 13.413 | 57.399 | 29.787 |
| ATOM | 390 | NH1  | ARG | 23 | 12.661 | 57.546 | 28.741 |
| ATOM | 391 | 1HH1 | ARG | 23 | 12.805 | 58.331 | 28.137 |
| ATOM | 392 | ZHH1 | ARG | 23 | 12.026 | 56.822 | 28.465 |
| ATOM | 393 | NH2  | ARG | 23 | 13.289 | 56.277 | 30.436 |
| ATOM | 394 | 1HH2 | ARG | 23 | 13.761 | 56.135 | 31.317 |
| ATOM | 395 | ZHH2 | ARG | 23 | 12.623 | 55.599 | 30.113 |
| ATOM | 396 | C    | ARG | 23 | 18.466 | 61.470 | 28.151 |
| ATOM | 397 | O    | ARG | 23 | 18.628 | 62.013 | 29.243 |
| ATOM | 398 | N    | ARG | 24 | 19.501 | 61.092 | 27.403 |
| ATOM | 399 | H    | ARG | 24 | 19.314 | 60.751 | 26.468 |
| ATOM | 400 | CA   | ARG | 24 | 20.825 | 60.803 | 27.963 |
| ATOM | 401 | HA   | ARG | 24 | 20.880 | 61.155 | 28.997 |

|       |     |      |     |    |        |        |        |
|-------|-----|------|-----|----|--------|--------|--------|
| ATOM  | 402 | CB   | ARG | 24 | 21.015 | 59.266 | 27.939 |
| ATOM  | 403 | ZHB  | ARG | 24 | 22.020 | 59.006 | 27.614 |
| ATOM  | 404 | 3HB  | ARG | 24 | 20.312 | 58.817 | 27.234 |
| ATOM  | 405 | CG   | ARG | 24 | 20.768 | 58.614 | 29.302 |
| ATOM  | 406 | ZHG  | ARG | 24 | 19.716 | 58.740 | 29.563 |
| ATOM  | 407 | 3HG  | ARG | 24 | 21.372 | 59.101 | 30.069 |
| ATOM  | 408 | CD   | ARG | 24 | 21.095 | 57.112 | 29.251 |
| ATOM  | 409 | ZHD  | ARG | 24 | 20.838 | 56.724 | 28.259 |
| ATOM  | 410 | 3HD  | ARG | 24 | 20.463 | 56.593 | 29.970 |
| ATOM  | 411 | NE   | ARG | 24 | 22.507 | 56.819 | 29.551 |
| ATOM  | 412 | HE   | ARG | 24 | 23.133 | 56.781 | 28.761 |
| ATOM  | 413 | CZ   | ARG | 24 | 22.942 | 56.267 | 30.678 |
| ATOM  | 414 | NH1  | ARG | 24 | 22.259 | 56.187 | 31.776 |
| ATOM  | 415 | 1HH1 | ARG | 24 | 21.320 | 56.503 | 31.816 |
| ATOM  | 416 | 2HH1 | ARG | 24 | 22.573 | 55.481 | 32.440 |
| ATOM  | 417 | NH2  | ARG | 24 | 24.084 | 55.673 | 30.739 |
| ATOM  | 418 | 1HH2 | ARG | 24 | 24.667 | 55.590 | 29.937 |
| ATOM  | 419 | 2HH2 | ARG | 24 | 24.190 | 55.015 | 31.507 |
| ATOM  | 420 | C    | ARG | 24 | 21.898 | 61.569 | 27.185 |
| ATOM  | 421 | O    | ARG | 24 | 22.530 | 61.014 | 26.294 |
| TER   |     |      |     |    |        |        |        |
| MOL 2 |     |      |     |    |        |        |        |
| ATOM  | 422 | N    | SER | 25 | 33.884 | 56.153 | 6.605  |
| ATOM  | 423 | H    | SER | 25 | 34.292 | 55.332 | 7.039  |
| ATOM  | 424 | CA   | SER | 25 | 32.579 | 56.604 | 7.092  |
| ATOM  | 425 | HA   | SER | 25 | 32.026 | 55.732 | 7.431  |
| ATOM  | 426 | CB   | SER | 25 | 32.796 | 57.548 | 8.277  |
| ATOM  | 427 | ZHB  | SER | 25 | 33.505 | 58.326 | 7.988  |
| ATOM  | 428 | 3HB  | SER | 25 | 31.856 | 58.023 | 8.558  |
| ATOM  | 429 | OG   | SER | 25 | 33.295 | 56.828 | 9.391  |
| ATOM  | 430 | HG   | SER | 25 | 33.994 | 56.226 | 9.100  |
| ATOM  | 431 | C    | SER | 25 | 31.701 | 57.294 | 6.038  |
| ATOM  | 432 | O    | SER | 25 | 30.530 | 57.564 | 6.302  |
| ATOM  | 433 | N    | ALA | 26 | 32.236 | 57.578 | 4.847  |
| ATOM  | 434 | H    | ALA | 26 | 33.186 | 57.272 | 4.666  |
| ATOM  | 435 | CA   | ALA | 26 | 31.516 | 58.287 | 3.785  |
| ATOM  | 436 | HA   | ALA | 26 | 30.824 | 58.995 | 4.246  |
| ATOM  | 437 | CB   | ALA | 26 | 32.539 | 59.091 | 2.979  |
| ATOM  | 438 | 1HB  | ALA | 26 | 32.025 | 59.649 | 2.196  |
| ATOM  | 439 | ZHB  | ALA | 26 | 33.054 | 59.788 | 3.640  |
| ATOM  | 440 | 3HB  | ALA | 26 | 33.262 | 58.412 | 2.525  |
| ATOM  | 441 | C    | ALA | 26 | 30.665 | 57.373 | 2.882  |
| ATOM  | 442 | O    | ALA | 26 | 29.815 | 57.866 | 2.139  |
| ATOM  | 443 | N    | SER | 27 | 30.865 | 56.052 | 2.944  |
| ATOM  | 444 | H    | SER | 27 | 31.597 | 55.709 | 3.550  |
| ATOM  | 445 | CA   | SER | 27 | 30.066 | 55.062 | 2.217  |
| ATOM  | 446 | HA   | SER | 27 | 29.120 | 55.526 | 1.935  |
| ATOM  | 447 | CB   | SER | 27 | 30.772 | 54.644 | 0.921  |
| ATOM  | 448 | ZHB  | SER | 27 | 30.040 | 54.182 | 0.257  |
| ATOM  | 449 | 3HB  | SER | 27 | 31.173 | 55.532 | 0.428  |
| ATOM  | 450 | OG   | SER | 27 | 31.815 | 53.715 | 1.159  |
| ATOM  | 451 | HG   | SER | 27 | 32.169 | 53.432 | 0.306  |
| ATOM  | 452 | C    | SER | 27 | 29.725 | 53.843 | 3.078  |
| ATOM  | 453 | O    | SER | 27 | 30.398 | 53.540 | 4.065  |
| ATOM  | 454 | N    | GLU | 28 | 28.677 | 53.115 | 2.698  |
| ATOM  | 455 | H    | GLU | 28 | 28.154 | 53.406 | 1.886  |
| ATOM  | 456 | CA   | GLU | 28 | 28.215 | 51.927 | 3.430  |
| ATOM  | 457 | HA   | GLU | 28 | 28.073 | 52.211 | 4.473  |
| ATOM  | 458 | CB   | GLU | 28 | 26.854 | 51.490 | 2.875  |
| ATOM  | 459 | ZHB  | GLU | 28 | 26.448 | 50.698 | 3.499  |
| ATOM  | 460 | 3HB  | GLU | 28 | 26.189 | 52.352 | 2.963  |
| ATOM  | 461 | CG   | GLU | 28 | 26.880 | 50.998 | 1.410  |
| ATOM  | 462 | ZHG  | GLU | 28 | 27.488 | 51.683 | 0.808  |
| ATOM  | 463 | 3HG  | GLU | 28 | 27.333 | 50.013 | 1.361  |
| ATOM  | 464 | CD   | GLU | 28 | 25.463 | 50.988 | 0.827  |
| ATOM  | 465 | OE1  | GLU | 28 | 24.796 | 52.027 | 0.907  |
| ATOM  | 466 | OE2  | GLU | 28 | 24.960 | 49.960 | 0.304  |
| ATOM  | 467 | C    | GLU | 28 | 29.214 | 50.759 | 3.426  |
| ATOM  | 468 | O    | GLU | 28 | 29.189 | 49.933 | 4.336  |
| ATOM  | 469 | N    | GLU | 29 | 30.112 | 50.703 | 2.438  |
| ATOM  | 470 | H    | GLU | 29 | 30.058 | 51.394 | 1.706  |
| ATOM  | 471 | CA   | GLU | 29 | 31.197 | 49.719 | 2.367  |
| ATOM  | 472 | HA   | GLU | 29 | 30.810 | 48.729 | 2.614  |
| ATOM  | 473 | CB   | GLU | 29 | 31.755 | 49.682 | 0.936  |
| ATOM  | 474 | ZHB  | GLU | 29 | 32.032 | 50.694 | 0.635  |
| ATOM  | 475 | 3HB  | GLU | 29 | 32.652 | 49.061 | 0.919  |
| ATOM  | 476 | CG   | GLU | 29 | 30.743 | 49.109 | -0.067 |
| ATOM  | 477 | ZHG  | GLU | 29 | 30.522 | 48.072 | 0.202  |
| ATOM  | 478 | 3HG  | GLU | 29 | 29.809 | 49.674 | -0.014 |
| ATOM  | 479 | CD   | GLU | 29 | 31.293 | 49.180 | -1.496 |
| ATOM  | 480 | OE1  | GLU | 29 | 31.830 | 48.152 | -1.966 |
| ATOM  | 481 | OE2  | GLU | 29 | 31.173 | 50.273 | -2.098 |
| ATOM  | 482 | C    | GLU | 29 | 32.312 | 50.036 | 3.378  |
| ATOM  | 483 | O    | GLU | 29 | 32.806 | 49.134 | 4.052  |
| ATOM  | 484 | N    | GLN | 30 | 32.648 | 51.322 | 3.551  |
| ATOM  | 485 | H    | GLN | 30 | 32.161 | 52.023 | 3.009  |
| ATOM  | 486 | CA   | GLN | 30 | 33.579 | 51.772 | 4.592  |
| ATOM  | 487 | HA   | GLN | 30 | 34.502 | 51.189 | 4.532  |
| ATOM  | 488 | CB   | GLN | 30 | 33.911 | 53.259 | 4.398  |
| ATOM  | 489 | ZHB  | GLN | 30 | 32.988 | 53.830 | 4.294  |
| ATOM  | 490 | 3HB  | GLN | 30 | 34.446 | 53.623 | 5.276  |
| ATOM  | 491 | CG   | GLN | 30 | 34.799 | 53.490 | 3.172  |
| ATOM  | 492 | ZHG  | GLN | 30 | 35.760 | 53.005 | 3.346  |
| ATOM  | 493 | 3HG  | GLN | 30 | 34.349 | 53.038 | 2.289  |
| ATOM  | 494 | CD   | GLN | 30 | 35.031 | 54.969 | 2.882  |
| ATOM  | 495 | OE1  | GLN | 30 | 34.267 | 55.864 | 3.217  |
| ATOM  | 496 | NE2  | GLN | 30 | 36.115 | 55.280 | 2.207  |
| ATOM  | 497 | 1HE2 | GLN | 30 | 36.267 | 56.253 | 2.029  |
| ATOM  | 498 | ZHE2 | GLN | 30 | 36.759 | 54.553 | 1.954  |
| ATOM  | 499 | C    | GLN | 30 | 32.991 | 51.544 | 5.988  |
| ATOM  | 500 | O    | GLN | 30 | 33.666 | 51.011 | 6.864  |
| ATOM  | 501 | N    | VAL | 31 | 31.707 | 51.869 | 6.182  |
| ATOM  | 502 | H    | VAL | 31 | 31.205 | 52.332 | 5.431  |
| ATOM  | 503 | CA   | VAL | 31 | 31.030 | 51.599 | 7.457  |
| ATOM  | 504 | HA   | VAL | 31 | 31.655 | 52.009 | 8.253  |

|      |     |      |     |    |        |        |        |
|------|-----|------|-----|----|--------|--------|--------|
| ATOM | 505 | CB   | VAL | 31 | 29.658 | 52.294 | 7.529  |
| ATOM | 506 | HB   | VAL | 31 | 29.055 | 51.994 | 6.672  |
| ATOM | 507 | CG1  | VAL | 31 | 28.876 | 51.952 | 8.803  |
| ATOM | 508 | 1HG1 | VAL | 31 | 29.439 | 52.255 | 9.686  |
| ATOM | 509 | 2HG1 | VAL | 31 | 27.925 | 52.475 | 8.778  |
| ATOM | 510 | 3HG1 | VAL | 31 | 28.667 | 50.884 | 8.857  |
| ATOM | 511 | CG2  | VAL | 31 | 29.836 | 53.817 | 7.512  |
| ATOM | 512 | 1HG2 | VAL | 31 | 28.899 | 54.309 | 7.763  |
| ATOM | 513 | 2HG2 | VAL | 31 | 30.596 | 54.109 | 8.237  |
| ATOM | 514 | 3HG2 | VAL | 31 | 30.144 | 54.142 | 6.521  |
| ATOM | 515 | C    | VAL | 31 | 30.926 | 50.098 | 7.733  |
| ATOM | 516 | O    | VAL | 31 | 31.053 | 49.707 | 8.889  |
| ATOM | 517 | N    | ALA | 32 | 30.737 | 49.234 | 6.730  |
| ATOM | 518 | H    | ALA | 32 | 30.579 | 49.592 | 5.794  |
| ATOM | 519 | CA   | ALA | 32 | 30.777 | 47.782 | 6.924  |
| ATOM | 520 | HA   | ALA | 32 | 30.060 | 47.516 | 7.701  |
| ATOM | 521 | CB   | ALA | 32 | 30.346 | 47.089 | 5.627  |
| ATOM | 522 | 1HB  | ALA | 32 | 29.320 | 47.368 | 5.388  |
| ATOM | 523 | 2HB  | ALA | 32 | 31.000 | 47.387 | 4.807  |
| ATOM | 524 | 3HB  | ALA | 32 | 30.404 | 46.008 | 5.752  |
| ATOM | 525 | C    | ALA | 32 | 32.159 | 47.291 | 7.403  |
| ATOM | 526 | O    | ALA | 32 | 32.219 | 46.402 | 8.253  |
| ATOM | 527 | N    | GLN | 33 | 33.250 | 47.894 | 6.916  |
| ATOM | 528 | H    | GLN | 33 | 33.131 | 48.613 | 6.209  |
| ATOM | 529 | CA   | GLN | 33 | 34.607 | 47.635 | 7.408  |
| ATOM | 530 | HA   | GLN | 33 | 34.772 | 46.557 | 7.394  |
| ATOM | 531 | CB   | GLN | 33 | 35.634 | 48.303 | 6.473  |
| ATOM | 532 | 2HB  | GLN | 33 | 35.163 | 49.109 | 5.911  |
| ATOM | 533 | 3HB  | GLN | 33 | 36.449 | 48.728 | 7.062  |
| ATOM | 534 | CG   | GLN | 33 | 36.227 | 47.287 | 5.488  |
| ATOM | 535 | 2HG  | GLN | 33 | 36.773 | 46.534 | 6.059  |
| ATOM | 536 | 3HG  | GLN | 33 | 35.427 | 46.791 | 4.937  |
| ATOM | 537 | CD   | GLN | 33 | 37.167 | 47.928 | 4.475  |
| ATOM | 538 | OE1  | GLN | 33 | 36.906 | 48.942 | 3.855  |
| ATOM | 539 | NE2  | GLN | 33 | 38.312 | 47.327 | 4.228  |
| ATOM | 540 | 1HE2 | GLN | 33 | 38.554 | 46.495 | 4.728  |
| ATOM | 541 | 2HE2 | GLN | 33 | 38.877 | 47.757 | 3.525  |
| ATOM | 542 | C    | GLN | 33 | 34.790 | 48.061 | 8.875  |
| ATOM | 543 | O    | GLN | 33 | 35.234 | 47.243 | 9.680  |
| ATOM | 544 | N    | ASP | 34 | 34.377 | 49.277 | 9.253  |
| ATOM | 545 | H    | ASP | 34 | 34.076 | 49.934 | 8.538  |
| ATOM | 546 | CA   | ASP | 34 | 34.412 | 49.720 | 10.658 |
| ATOM | 547 | HA   | ASP | 34 | 35.432 | 49.631 | 11.035 |
| ATOM | 548 | CB   | ASP | 34 | 33.980 | 51.195 | 10.758 |
| ATOM | 549 | 2HB  | ASP | 34 | 33.021 | 51.322 | 10.254 |
| ATOM | 550 | 3HB  | ASP | 34 | 33.830 | 51.433 | 11.812 |
| ATOM | 551 | CG   | ASP | 34 | 34.995 | 52.205 | 10.202 |
| ATOM | 552 | OD1  | ASP | 34 | 34.540 | 53.208 | 9.600  |
| ATOM | 553 | OD2  | ASP | 34 | 36.203 | 52.043 | 10.486 |
| ATOM | 554 | C    | ASP | 34 | 33.508 | 48.851 | 11.563 |
| ATOM | 555 | O    | ASP | 34 | 33.840 | 48.586 | 12.721 |
| ATOM | 556 | N    | THR | 35 | 32.374 | 48.365 | 11.041 |
| ATOM | 557 | H    | THR | 35 | 32.165 | 48.626 | 10.084 |
| ATOM | 558 | CA   | THR | 35 | 31.376 | 47.590 | 11.803 |
| ATOM | 559 | HA   | THR | 35 | 31.096 | 48.171 | 12.682 |
| ATOM | 560 | CB   | THR | 35 | 30.099 | 47.323 | 10.984 |
| ATOM | 561 | HB   | THR | 35 | 30.339 | 46.733 | 10.099 |
| ATOM | 562 | CG2  | THR | 35 | 29.006 | 46.612 | 11.783 |
| ATOM | 563 | 1HG2 | THR | 35 | 28.059 | 46.689 | 11.251 |
| ATOM | 564 | 2HG2 | THR | 35 | 29.251 | 45.560 | 11.905 |
| ATOM | 565 | 3HG2 | THR | 35 | 28.906 | 47.073 | 12.766 |
| ATOM | 566 | OG1  | THR | 35 | 29.508 | 48.531 | 10.579 |
| ATOM | 567 | 1HG  | THR | 35 | 30.103 | 48.940 | 9.916  |
| ATOM | 568 | C    | THR | 35 | 31.924 | 46.258 | 12.309 |
| ATOM | 569 | O    | THR | 35 | 31.576 | 45.849 | 13.418 |
| ATOM | 570 | N    | GLU | 36 | 32.791 | 45.571 | 11.556 |
| ATOM | 571 | H    | GLU | 36 | 33.082 | 45.947 | 10.659 |
| ATOM | 572 | CA   | GLU | 36 | 33.367 | 44.312 | 12.046 |
| ATOM | 573 | HA   | GLU | 36 | 32.553 | 43.747 | 12.501 |
| ATOM | 574 | CB   | GLU | 36 | 33.890 | 43.430 | 10.895 |
| ATOM | 575 | 2HB  | GLU | 36 | 33.864 | 42.404 | 11.263 |
| ATOM | 576 | 3HB  | GLU | 36 | 33.197 | 43.488 | 10.056 |
| ATOM | 577 | CG   | GLU | 36 | 35.302 | 43.712 | 10.363 |
| ATOM | 578 | 2HG  | GLU | 36 | 35.268 | 44.484 | 9.594  |
| ATOM | 579 | 3HG  | GLU | 36 | 35.936 | 44.061 | 11.174 |
| ATOM | 580 | CD   | GLU | 36 | 35.920 | 42.431 | 9.801  |
| ATOM | 581 | OE1  | GLU | 36 | 35.679 | 42.103 | 8.613  |
| ATOM | 582 | OE2  | GLU | 36 | 36.616 | 41.738 | 10.586 |
| ATOM | 583 | C    | GLU | 36 | 34.375 | 44.534 | 13.188 |
| ATOM | 584 | O    | GLU | 36 | 34.481 | 43.704 | 14.091 |
| ATOM | 585 | N    | GLU | 37 | 35.054 | 45.684 | 13.202 |
| ATOM | 586 | H    | GLU | 37 | 34.884 | 46.356 | 12.462 |
| ATOM | 587 | CA   | GLU | 37 | 35.995 | 46.071 | 14.258 |
| ATOM | 588 | HA   | GLU | 37 | 36.597 | 45.200 | 14.519 |
| ATOM | 589 | CB   | GLU | 37 | 36.911 | 47.174 | 13.694 |
| ATOM | 590 | 2HB  | GLU | 37 | 37.113 | 46.965 | 12.641 |
| ATOM | 591 | 3HB  | GLU | 37 | 36.380 | 48.126 | 13.744 |
| ATOM | 592 | CG   | GLU | 37 | 38.259 | 47.322 | 14.416 |
| ATOM | 593 | 2HG  | GLU | 37 | 38.796 | 48.155 | 13.955 |
| ATOM | 594 | 3HG  | GLU | 37 | 38.071 | 47.590 | 15.455 |
| ATOM | 595 | CD   | GLU | 37 | 39.129 | 46.052 | 14.361 |
| ATOM | 596 | OE1  | GLU | 37 | 39.541 | 45.535 | 15.418 |
| ATOM | 597 | OE2  | GLU | 37 | 39.330 | 45.487 | 13.254 |
| ATOM | 598 | C    | GLU | 37 | 35.245 | 46.516 | 15.529 |
| ATOM | 599 | O    | GLU | 37 | 35.610 | 46.115 | 16.639 |
| ATOM | 600 | N    | VAL | 38 | 34.135 | 47.252 | 15.365 |
| ATOM | 601 | H    | VAL | 38 | 33.923 | 47.580 | 14.424 |
| ATOM | 602 | CA   | VAL | 38 | 33.181 | 47.567 | 16.443 |
| ATOM | 603 | HA   | VAL | 38 | 33.717 | 48.076 | 17.244 |
| ATOM | 604 | CB   | VAL | 38 | 32.054 | 48.499 | 15.937 |
| ATOM | 605 | HB   | VAL | 38 | 31.598 | 48.044 | 15.059 |
| ATOM | 606 | CG1  | VAL | 38 | 30.949 | 48.731 | 16.979 |
| ATOM | 607 | 1HG1 | VAL | 38 | 30.408 | 47.806 | 17.174 |
| ATOM | 608 | 2HG1 | VAL | 38 | 31.380 | 49.102 | 17.908 |
| ATOM | 609 | 3HG1 | VAL | 38 | 30.233 | 49.461 | 16.598 |

|      |     |      |     |    |        |        |        |
|------|-----|------|-----|----|--------|--------|--------|
| ATOM | 610 | CG2  | VAL | 38 | 32.576 | 49.886 | 15.545 |
| ATOM | 611 | 1HG2 | VAL | 38 | 31.796 | 50.417 | 15.001 |
| ATOM | 612 | 2HG2 | VAL | 38 | 32.857 | 50.455 | 16.430 |
| ATOM | 613 | 3HG2 | VAL | 38 | 33.438 | 49.801 | 14.889 |
| ATOM | 614 | C    | VAL | 38 | 32.587 | 46.282 | 17.032 |
| ATOM | 615 | O    | VAL | 38 | 32.572 | 46.133 | 18.254 |
| ATOM | 616 | N    | PHE | 39 | 32.135 | 45.332 | 16.202 |
| ATOM | 617 | H    | PHE | 39 | 32.153 | 45.517 | 15.202 |
| ATOM | 618 | CA   | PHE | 39 | 31.489 | 44.098 | 16.664 |
| ATOM | 619 | HA   | PHE | 39 | 30.703 | 44.373 | 17.367 |
| ATOM | 620 | CB   | PHE | 39 | 30.821 | 43.371 | 15.489 |
| ATOM | 621 | ZHB  | PHE | 39 | 30.193 | 44.081 | 14.948 |
| ATOM | 622 | 3HB  | PHE | 39 | 31.590 | 43.023 | 14.797 |
| ATOM | 623 | CG   | PHE | 39 | 29.952 | 42.197 | 15.915 |
| ATOM | 624 | CD1  | PHE | 39 | 28.629 | 42.416 | 16.344 |
| ATOM | 625 | HD1  | PHE | 39 | 28.234 | 43.419 | 16.352 |
| ATOM | 626 | CE1  | PHE | 39 | 27.823 | 41.337 | 16.753 |
| ATOM | 627 | HE1  | PHE | 39 | 26.807 | 41.515 | 17.078 |
| ATOM | 628 | CZ   | PHE | 39 | 28.336 | 40.029 | 16.724 |
| ATOM | 629 | HZ   | PHE | 39 | 27.717 | 39.196 | 17.027 |
| ATOM | 630 | CE2  | PHE | 39 | 29.656 | 39.804 | 16.295 |
| ATOM | 631 | HE2  | PHE | 39 | 30.056 | 38.801 | 16.269 |
| ATOM | 632 | CD2  | PHE | 39 | 30.464 | 40.886 | 15.905 |
| ATOM | 633 | HD2  | PHE | 39 | 31.483 | 40.706 | 15.598 |
| ATOM | 634 | C    | PHE | 39 | 32.456 | 43.174 | 17.415 |
| ATOM | 635 | O    | PHE | 39 | 32.129 | 42.729 | 18.518 |
| ATOM | 636 | N    | ARG | 40 | 33.667 | 42.931 | 16.886 |
| ATOM | 637 | H    | ARG | 40 | 33.892 | 43.337 | 15.977 |
| ATOM | 638 | CA   | ARG | 40 | 34.699 | 42.139 | 17.588 |
| ATOM | 639 | HA   | ARG | 40 | 34.288 | 41.156 | 17.822 |
| ATOM | 640 | CB   | ARG | 40 | 35.943 | 41.960 | 16.691 |
| ATOM | 641 | ZHB  | ARG | 40 | 36.224 | 42.917 | 16.249 |
| ATOM | 642 | 3HB  | ARG | 40 | 36.773 | 41.603 | 17.304 |
| ATOM | 643 | CG   | ARG | 40 | 35.674 | 40.923 | 15.584 |
| ATOM | 644 | ZHG  | ARG | 40 | 35.304 | 40.016 | 16.064 |
| ATOM | 645 | 3HG  | ARG | 40 | 34.888 | 41.291 | 14.928 |
| ATOM | 646 | CD   | ARG | 40 | 36.904 | 40.528 | 14.745 |
| ATOM | 647 | ZHD  | ARG | 40 | 37.777 | 40.444 | 15.391 |
| ATOM | 648 | 3HD  | ARG | 40 | 36.713 | 39.539 | 14.326 |
| ATOM | 649 | NE   | ARG | 40 | 37.174 | 41.444 | 13.619 |
| ATOM | 650 | HE   | ARG | 40 | 36.738 | 41.252 | 12.723 |
| ATOM | 651 | CZ   | ARG | 40 | 37.929 | 42.524 | 13.610 |
| ATOM | 652 | NH1  | ARG | 40 | 38.587 | 42.960 | 14.643 |
| ATOM | 653 | 1HH1 | ARG | 40 | 38.655 | 42.419 | 15.491 |
| ATOM | 654 | 2HH1 | ARG | 40 | 39.080 | 43.856 | 14.586 |
| ATOM | 655 | NH2  | ARG | 40 | 38.044 | 43.177 | 12.503 |
| ATOM | 656 | 1HH2 | ARG | 40 | 37.596 | 42.804 | 11.667 |
| ATOM | 657 | 2HH2 | ARG | 40 | 38.560 | 44.060 | 12.507 |
| ATOM | 658 | C    | ARG | 40 | 35.052 | 42.763 | 18.943 |
| ATOM | 659 | O    | ARG | 40 | 35.122 | 42.049 | 19.946 |
| ATOM | 660 | N    | SER | 41 | 35.161 | 44.090 | 18.994 |
| ATOM | 661 | H    | SER | 41 | 35.108 | 44.604 | 18.121 |
| ATOM | 662 | CA   | SER | 41 | 35.430 | 44.839 | 20.227 |
| ATOM | 663 | HA   | SER | 41 | 36.286 | 44.391 | 20.723 |
| ATOM | 664 | CB   | SER | 41 | 35.796 | 46.284 | 19.887 |
| ATOM | 665 | ZHB  | SER | 41 | 34.954 | 46.782 | 19.405 |
| ATOM | 666 | 3HB  | SER | 41 | 36.052 | 46.816 | 20.804 |
| ATOM | 667 | OG   | SER | 41 | 36.909 | 46.292 | 19.016 |
| ATOM | 668 | HG   | SER | 41 | 36.576 | 46.241 | 18.097 |
| ATOM | 669 | C    | SER | 41 | 34.275 | 44.786 | 21.231 |
| ATOM | 670 | O    | SER | 41 | 34.504 | 44.573 | 22.422 |
| ATOM | 671 | N    | TYR | 42 | 33.031 | 44.916 | 20.766 |
| ATOM | 672 | H    | TYR | 42 | 32.901 | 45.104 | 19.777 |
| ATOM | 673 | CA   | TYR | 42 | 31.827 | 44.777 | 21.587 |
| ATOM | 674 | HA   | TYR | 42 | 31.878 | 45.478 | 22.420 |
| ATOM | 675 | CB   | TYR | 42 | 30.610 | 45.134 | 20.724 |
| ATOM | 676 | ZHB  | TYR | 42 | 30.671 | 46.191 | 20.462 |
| ATOM | 677 | 3HB  | TYR | 42 | 30.654 | 44.565 | 19.795 |
| ATOM | 678 | CG   | TYR | 42 | 29.266 | 44.887 | 21.378 |
| ATOM | 679 | CD1  | TYR | 42 | 28.886 | 45.639 | 22.504 |
| ATOM | 680 | HD1  | TYR | 42 | 29.571 | 46.372 | 22.904 |
| ATOM | 681 | CE1  | TYR | 42 | 27.624 | 45.440 | 23.098 |
| ATOM | 682 | HE1  | TYR | 42 | 27.327 | 46.020 | 23.956 |
| ATOM | 683 | CZ   | TYR | 42 | 26.737 | 44.487 | 22.558 |
| ATOM | 684 | OH   | TYR | 42 | 25.511 | 44.294 | 23.110 |
| ATOM | 685 | HH   | TYR | 42 | 25.357 | 44.864 | 23.864 |
| ATOM | 686 | CE2  | TYR | 42 | 27.123 | 43.733 | 21.434 |
| ATOM | 687 | HE2  | TYR | 42 | 26.434 | 43.013 | 21.029 |
| ATOM | 688 | CD2  | TYR | 42 | 28.390 | 43.919 | 20.851 |
| ATOM | 689 | HD2  | TYR | 42 | 28.680 | 43.327 | 19.994 |
| ATOM | 690 | C    | TYR | 42 | 31.705 | 43.376 | 22.198 |
| ATOM | 691 | O    | TYR | 42 | 31.568 | 43.264 | 23.415 |
| ATOM | 692 | N    | VAL | 43 | 31.850 | 42.316 | 21.393 |
| ATOM | 693 | H    | VAL | 43 | 31.997 | 42.482 | 20.400 |
| ATOM | 694 | CA   | VAL | 43 | 31.815 | 40.920 | 21.863 |
| ATOM | 695 | HA   | VAL | 43 | 30.847 | 40.738 | 22.326 |
| ATOM | 696 | CB   | VAL | 43 | 31.988 | 39.952 | 20.672 |
| ATOM | 697 | HB   | VAL | 43 | 32.856 | 40.267 | 20.091 |
| ATOM | 698 | CG1  | VAL | 43 | 32.208 | 38.496 | 21.104 |
| ATOM | 699 | 1HG1 | VAL | 43 | 33.190 | 38.389 | 21.568 |
| ATOM | 700 | 2HG1 | VAL | 43 | 31.438 | 38.188 | 21.811 |
| ATOM | 701 | 3HG1 | VAL | 43 | 32.180 | 37.845 | 20.231 |
| ATOM | 702 | CG2  | VAL | 43 | 30.762 | 39.965 | 19.748 |
| ATOM | 703 | 1HG2 | VAL | 43 | 31.018 | 39.466 | 18.814 |
| ATOM | 704 | 2HG2 | VAL | 43 | 29.925 | 39.442 | 20.203 |
| ATOM | 705 | 3HG2 | VAL | 43 | 30.460 | 40.986 | 19.514 |
| ATOM | 706 | C    | VAL | 43 | 32.871 | 40.671 | 22.944 |
| ATOM | 707 | O    | VAL | 43 | 32.531 | 40.154 | 24.011 |
| ATOM | 708 | N    | PHE | 44 | 34.117 | 41.097 | 22.712 |
| ATOM | 709 | H    | PHE | 44 | 34.337 | 41.501 | 21.808 |
| ATOM | 710 | CA   | PHE | 44 | 35.206 | 40.952 | 23.678 |
| ATOM | 711 | HA   | PHE | 44 | 35.322 | 39.894 | 23.920 |
| ATOM | 712 | CB   | PHE | 44 | 36.507 | 41.440 | 23.025 |
| ATOM | 713 | ZHB  | PHE | 44 | 36.685 | 40.856 | 22.120 |
| ATOM | 714 | 3HB  | PHE | 44 | 36.392 | 42.481 | 22.723 |

|      |     |      |     |    |        |        |        |
|------|-----|------|-----|----|--------|--------|--------|
| ATOM | 715 | CG   | PHE | 44 | 37.722 | 41.320 | 23.921 |
| ATOM | 716 | CD1  | PHE | 44 | 38.444 | 40.113 | 23.967 |
| ATOM | 717 | HD1  | PHE | 44 | 38.141 | 39.272 | 23.358 |
| ATOM | 718 | CE1  | PHE | 44 | 39.566 | 39.995 | 24.806 |
| ATOM | 719 | HE1  | PHE | 44 | 40.120 | 39.066 | 24.834 |
| ATOM | 720 | CZ   | PHE | 44 | 39.965 | 41.081 | 25.605 |
| ATOM | 721 | HZ   | PHE | 44 | 40.824 | 40.986 | 26.253 |
| ATOM | 722 | CE2  | PHE | 44 | 39.242 | 42.287 | 25.564 |
| ATOM | 723 | HE2  | PHE | 44 | 39.540 | 43.118 | 26.188 |
| ATOM | 724 | CD2  | PHE | 44 | 38.124 | 42.408 | 24.721 |
| ATOM | 725 | HD2  | PHE | 44 | 37.573 | 43.337 | 24.693 |
| ATOM | 726 | C    | PHE | 44 | 34.912 | 41.687 | 24.996 |
| ATOM | 727 | O    | PHE | 44 | 34.862 | 41.062 | 26.057 |
| ATOM | 728 | N    | TYR | 45 | 34.653 | 43.000 | 24.950 |
| ATOM | 729 | H    | TYR | 45 | 34.653 | 43.477 | 24.055 |
| ATOM | 730 | CA   | TYR | 45 | 34.457 | 43.793 | 26.170 |
| ATOM | 731 | HA   | TYR | 45 | 35.280 | 43.571 | 26.850 |
| ATOM | 732 | CB   | TYR | 45 | 34.495 | 45.295 | 25.848 |
| ATOM | 733 | ZHB  | TYR | 45 | 33.853 | 45.497 | 24.988 |
| ATOM | 734 | 3HB  | TYR | 45 | 34.085 | 45.844 | 26.697 |
| ATOM | 735 | CG   | TYR | 45 | 35.892 | 45.834 | 25.598 |
| ATOM | 736 | CD1  | TYR | 45 | 36.867 | 45.732 | 26.611 |
| ATOM | 737 | HD1  | TYR | 45 | 36.624 | 45.263 | 27.559 |
| ATOM | 738 | CE1  | TYR | 45 | 38.170 | 46.212 | 26.392 |
| ATOM | 739 | HE1  | TYR | 45 | 38.909 | 46.103 | 27.172 |
| ATOM | 740 | CZ   | TYR | 45 | 38.499 | 46.815 | 25.159 |
| ATOM | 741 | OH   | TYR | 45 | 39.753 | 47.295 | 24.956 |
| ATOM | 742 | HH   | TYR | 45 | 40.331 | 47.048 | 25.680 |
| ATOM | 743 | CE2  | TYR | 45 | 37.518 | 46.946 | 24.154 |
| ATOM | 744 | HE2  | TYR | 45 | 37.770 | 47.423 | 23.218 |
| ATOM | 745 | CD2  | TYR | 45 | 36.218 | 46.451 | 24.375 |
| ATOM | 746 | HD2  | TYR | 45 | 35.466 | 46.550 | 23.605 |
| ATOM | 747 | C    | TYR | 45 | 33.182 | 43.416 | 26.936 |
| ATOM | 748 | O    | TYR | 45 | 33.211 | 43.377 | 28.165 |
| ATOM | 749 | N    | ARG | 46 | 32.090 | 43.067 | 26.241 |
| ATOM | 750 | H    | ARG | 46 | 32.117 | 43.107 | 25.227 |
| ATOM | 751 | CA   | ARG | 46 | 30.845 | 42.624 | 26.885 |
| ATOM | 752 | HA   | ARG | 46 | 30.616 | 43.326 | 27.687 |
| ATOM | 753 | CB   | ARG | 46 | 29.704 | 42.624 | 25.851 |
| ATOM | 754 | ZHB  | ARG | 46 | 29.678 | 43.588 | 25.342 |
| ATOM | 755 | 3HB  | ARG | 46 | 29.902 | 41.852 | 25.104 |
| ATOM | 756 | CG   | ARG | 46 | 28.319 | 42.362 | 26.458 |
| ATOM | 757 | ZHG  | ARG | 46 | 27.602 | 42.234 | 25.646 |
| ATOM | 758 | 3HG  | ARG | 46 | 28.350 | 41.433 | 27.028 |
| ATOM | 759 | CD   | ARG | 46 | 27.826 | 43.498 | 27.364 |
| ATOM | 760 | ZHD  | ARG | 46 | 28.628 | 43.810 | 28.032 |
| ATOM | 761 | 3HD  | ARG | 46 | 27.550 | 44.357 | 26.751 |
| ATOM | 762 | NE   | ARG | 46 | 26.664 | 43.044 | 28.147 |
| ATOM | 763 | HE   | ARG | 46 | 25.902 | 42.627 | 27.639 |
| ATOM | 764 | CZ   | ARG | 46 | 26.575 | 42.982 | 29.465 |
| ATOM | 765 | NH1  | ARG | 46 | 27.446 | 43.537 | 30.266 |
| ATOM | 766 | 1HH1 | ARG | 46 | 28.196 | 44.095 | 29.882 |
| ATOM | 767 | 2HH1 | ARG | 46 | 27.300 | 43.550 | 31.264 |
| ATOM | 768 | NH2  | ARG | 46 | 25.582 | 42.336 | 30.002 |
| ATOM | 769 | 1HH2 | ARG | 46 | 24.834 | 41.969 | 29.436 |
| ATOM | 770 | 2HH2 | ARG | 46 | 25.501 | 42.333 | 30.996 |
| ATOM | 771 | C    | ARG | 46 | 31.014 | 41.267 | 27.571 |
| ATOM | 772 | O    | ARG | 46 | 30.538 | 41.088 | 28.688 |
| ATOM | 773 | N    | HIP | 47 | 31.771 | 40.344 | 26.965 |
| ATOM | 774 | H    | HIP | 47 | 32.137 | 40.529 | 26.038 |
| ATOM | 775 | CA   | HIP | 47 | 32.125 | 39.080 | 27.621 |
| ATOM | 776 | HA   | HIP | 47 | 31.210 | 38.634 | 28.012 |
| ATOM | 777 | CB   | HIP | 47 | 32.746 | 38.113 | 26.607 |
| ATOM | 778 | ZHB  | HIP | 47 | 32.060 | 37.987 | 25.767 |
| ATOM | 779 | 3HB  | HIP | 47 | 33.673 | 38.546 | 26.220 |
| ATOM | 780 | CG   | HIP | 47 | 33.044 | 36.755 | 27.193 |
| ATOM | 781 | ND1  | HIP | 47 | 32.232 | 36.028 | 28.049 |
| ATOM | 782 | HD1  | HIP | 47 | 31.356 | 36.351 | 28.441 |
| ATOM | 783 | CE1  | HIP | 47 | 32.862 | 34.871 | 28.339 |
| ATOM | 784 | HE1  | HIP | 47 | 32.501 | 34.087 | 28.997 |
| ATOM | 785 | NE2  | HIP | 47 | 34.043 | 34.852 | 27.687 |
| ATOM | 786 | HE2  | HIP | 47 | 34.730 | 34.081 | 27.699 |
| ATOM | 787 | CD2  | HIP | 47 | 34.182 | 36.032 | 26.980 |
| ATOM | 788 | HD2  | HIP | 47 | 35.035 | 36.336 | 26.383 |
| ATOM | 789 | C    | HIP | 47 | 33.031 | 39.288 | 28.836 |
| ATOM | 790 | O    | HIP | 47 | 32.749 | 38.709 | 29.880 |
| ATOM | 791 | N    | GLN | 48 | 34.041 | 40.154 | 28.722 |
| ATOM | 792 | H    | GLN | 48 | 34.226 | 40.569 | 27.816 |
| ATOM | 793 | CA   | GLN | 48 | 34.956 | 40.469 | 29.820 |
| ATOM | 794 | HA   | GLN | 48 | 35.439 | 39.540 | 30.132 |
| ATOM | 795 | CB   | GLN | 48 | 36.032 | 41.439 | 29.300 |
| ATOM | 796 | ZHB  | GLN | 48 | 36.375 | 41.100 | 28.321 |
| ATOM | 797 | 3HB  | GLN | 48 | 35.617 | 42.442 | 29.198 |
| ATOM | 798 | CG   | GLN | 48 | 37.241 | 41.475 | 30.238 |
| ATOM | 799 | ZHG  | GLN | 48 | 36.955 | 41.898 | 31.200 |
| ATOM | 800 | 3HG  | GLN | 48 | 37.578 | 40.451 | 30.404 |
| ATOM | 801 | CD   | GLN | 48 | 38.409 | 42.279 | 29.679 |
| ATOM | 802 | OE1  | GLN | 48 | 38.283 | 43.233 | 28.919 |
| ATOM | 803 | NE2  | GLN | 48 | 39.611 | 41.902 | 30.049 |
| ATOM | 804 | 1HE2 | GLN | 48 | 40.388 | 42.437 | 29.721 |
| ATOM | 805 | 2HE2 | GLN | 48 | 39.701 | 41.083 | 30.633 |
| ATOM | 806 | C    | GLN | 48 | 34.204 | 41.027 | 31.040 |
| ATOM | 807 | O    | GLN | 48 | 34.392 | 40.534 | 32.147 |
| ATOM | 808 | N    | GLN | 49 | 33.279 | 41.969 | 30.825 |
| ATOM | 809 | H    | GLN | 49 | 33.199 | 42.363 | 29.896 |
| ATOM | 810 | CA   | GLN | 49 | 32.384 | 42.493 | 31.866 |
| ATOM | 811 | HA   | GLN | 49 | 32.969 | 43.009 | 32.632 |
| ATOM | 812 | CB   | GLN | 49 | 31.393 | 43.457 | 31.217 |
| ATOM | 813 | ZHB  | GLN | 49 | 31.188 | 43.128 | 30.199 |
| ATOM | 814 | 3HB  | GLN | 49 | 30.450 | 43.442 | 31.770 |
| ATOM | 815 | CG   | GLN | 49 | 31.874 | 44.900 | 31.201 |
| ATOM | 816 | ZHG  | GLN | 49 | 31.985 | 45.243 | 32.233 |
| ATOM | 817 | 3HG  | GLN | 49 | 32.836 | 44.987 | 30.696 |
| ATOM | 818 | CD   | GLN | 49 | 30.834 | 45.754 | 30.495 |
| ATOM | 819 | OE1  | GLN | 49 | 30.157 | 45.342 | 29.559 |



|      |     |      |     |    |        |        |        |
|------|-----|------|-----|----|--------|--------|--------|
| ATOM | 820 | NE2  | GLN | 49 | 30.641 | 46.964 | 30.954 |
| ATOM | 821 | 1HE2 | GLN | 49 | 29.815 | 47.426 | 30.621 |
| ATOM | 822 | 2HE2 | GLN | 49 | 31.074 | 47.226 | 31.824 |
| ATOM | 823 | C    | GLN | 49 | 31.551 | 41.417 | 32.565 |
| ATOM | 824 | O    | GLN | 49 | 31.464 | 41.406 | 33.786 |
| ATOM | 825 | N    | GLU | 50 | 30.919 | 40.517 | 31.805 |
| ATOM | 826 | H    | GLU | 50 | 30.979 | 40.593 | 30.799 |
| ATOM | 827 | CA   | GLU | 50 | 30.103 | 39.445 | 32.389 |
| ATOM | 828 | HA   | GLU | 50 | 29.353 | 39.883 | 33.050 |
| ATOM | 829 | CB   | GLU | 50 | 29.399 | 38.660 | 31.277 |
| ATOM | 830 | 2HB  | GLU | 50 | 30.059 | 38.562 | 30.413 |
| ATOM | 831 | 3HB  | GLU | 50 | 29.161 | 37.658 | 31.638 |
| ATOM | 832 | CG   | GLU | 50 | 28.096 | 39.341 | 30.863 |
| ATOM | 833 | 2HG  | GLU | 50 | 27.475 | 39.492 | 31.750 |
| ATOM | 834 | 3HG  | GLU | 50 | 28.306 | 40.319 | 30.426 |
| ATOM | 835 | CD   | GLU | 50 | 27.348 | 38.468 | 29.858 |
| ATOM | 836 | OE1  | GLU | 50 | 26.259 | 37.954 | 30.180 |
| ATOM | 837 | OE2  | GLU | 50 | 27.803 | 38.309 | 28.703 |
| ATOM | 838 | C    | GLU | 50 | 30.911 | 38.484 | 33.264 |
| ATOM | 839 | O    | GLU | 50 | 30.359 | 37.913 | 34.197 |
| ATOM | 840 | N    | GLN | 51 | 32.207 | 38.320 | 32.988 |
| ATOM | 841 | H    | GLN | 51 | 32.600 | 38.798 | 32.187 |
| ATOM | 842 | CA   | GLN | 51 | 33.117 | 37.576 | 33.861 |
| ATOM | 843 | HA   | GLN | 51 | 32.595 | 36.704 | 34.266 |
| ATOM | 844 | CB   | GLN | 51 | 34.312 | 37.075 | 33.031 |
| ATOM | 845 | 2HB  | GLN | 51 | 34.816 | 37.936 | 32.595 |
| ATOM | 846 | 3HB  | GLN | 51 | 35.002 | 36.557 | 33.698 |
| ATOM | 847 | CG   | GLN | 51 | 33.931 | 36.112 | 31.897 |
| ATOM | 848 | 2HG  | GLN | 51 | 33.521 | 35.198 | 32.326 |
| ATOM | 849 | 3HG  | GLN | 51 | 33.169 | 36.562 | 31.266 |
| ATOM | 850 | CD   | GLN | 51 | 35.132 | 35.779 | 31.017 |
| ATOM | 851 | OE1  | GLN | 51 | 35.481 | 36.498 | 30.096 |
| ATOM | 852 | NE2  | GLN | 51 | 35.784 | 34.660 | 31.237 |
| ATOM | 853 | 1HE2 | GLN | 51 | 36.590 | 34.482 | 30.660 |
| ATOM | 854 | 2HE2 | GLN | 51 | 35.523 | 34.054 | 31.996 |
| ATOM | 855 | C    | GLN | 51 | 33.557 | 38.430 | 35.071 |
| ATOM | 856 | O    | GLN | 51 | 33.592 | 37.927 | 36.187 |
| ATOM | 857 | N    | GLU | 52 | 33.808 | 39.735 | 34.896 |
| ATOM | 858 | H    | GLU | 52 | 33.754 | 40.116 | 33.959 |
| ATOM | 859 | CA   | GLU | 52 | 34.109 | 40.676 | 35.995 |
| ATOM | 860 | HA   | GLU | 52 | 34.994 | 40.314 | 36.518 |
| ATOM | 861 | CB   | GLU | 52 | 34.405 | 42.078 | 35.403 |
| ATOM | 862 | 2HB  | GLU | 52 | 34.527 | 41.989 | 34.325 |
| ATOM | 863 | 3HB  | GLU | 52 | 33.557 | 42.742 | 35.584 |
| ATOM | 864 | CG   | GLU | 52 | 35.685 | 42.713 | 35.973 |
| ATOM | 865 | 2HG  | GLU | 52 | 35.542 | 42.888 | 37.041 |
| ATOM | 866 | 3HG  | GLU | 52 | 36.505 | 42.003 | 35.855 |
| ATOM | 867 | CD   | GLU | 52 | 36.092 | 44.027 | 35.274 |
| ATOM | 868 | OE1  | GLU | 52 | 36.023 | 44.092 | 34.021 |
| ATOM | 869 | OE2  | GLU | 52 | 36.559 | 44.948 | 35.980 |
| ATOM | 870 | C    | GLU | 52 | 32.975 | 40.740 | 37.041 |
| ATOM | 871 | O    | GLU | 52 | 33.233 | 40.858 | 38.240 |
| ATOM | 872 | N    | ALA | 53 | 31.721 | 40.585 | 36.599 |
| ATOM | 873 | H    | ALA | 53 | 31.582 | 40.551 | 35.596 |
| ATOM | 874 | CA   | ALA | 53 | 30.535 | 40.532 | 37.457 |
| ATOM | 875 | HA   | ALA | 53 | 30.539 | 41.429 | 38.077 |
| ATOM | 876 | CB   | ALA | 53 | 29.274 | 40.566 | 36.577 |
| ATOM | 877 | 1HB  | ALA | 53 | 28.524 | 41.195 | 37.058 |
| ATOM | 878 | 2HB  | ALA | 53 | 29.493 | 40.974 | 35.590 |
| ATOM | 879 | 3HB  | ALA | 53 | 28.869 | 39.559 | 36.462 |
| ATOM | 880 | C    | ALA | 53 | 30.510 | 39.326 | 38.420 |
| ATOM | 881 | O    | ALA | 53 | 29.833 | 39.385 | 39.446 |
| ATOM | 882 | N    | GLU | 54 | 31.272 | 38.259 | 38.148 |
| ATOM | 883 | H    | GLU | 54 | 31.817 | 38.252 | 37.291 |
| ATOM | 884 | CA   | GLU | 54 | 31.455 | 37.129 | 39.075 |
| ATOM | 885 | HA   | GLU | 54 | 30.506 | 36.957 | 39.586 |
| ATOM | 886 | CB   | GLU | 54 | 31.804 | 35.838 | 38.308 |
| ATOM | 887 | 2HB  | GLU | 54 | 32.729 | 35.991 | 37.753 |
| ATOM | 888 | 3HB  | GLU | 54 | 31.973 | 35.043 | 39.036 |
| ATOM | 889 | CG   | GLU | 54 | 30.692 | 35.386 | 37.348 |
| ATOM | 890 | 2HG  | GLU | 54 | 29.730 | 35.463 | 37.863 |
| ATOM | 891 | 3HG  | GLU | 54 | 30.666 | 36.061 | 36.491 |
| ATOM | 892 | CD   | GLU | 54 | 30.898 | 33.939 | 36.866 |
| ATOM | 893 | OE1  | GLU | 54 | 30.322 | 33.026 | 37.505 |
| ATOM | 894 | OE2  | GLU | 54 | 31.626 | 33.740 | 35.863 |
| ATOM | 895 | C    | GLU | 54 | 32.489 | 37.424 | 40.187 |
| ATOM | 896 | O    | GLU | 54 | 32.848 | 36.541 | 40.967 |
| ATOM | 897 | N    | GLY | 55 | 32.979 | 38.666 | 40.287 |
| ATOM | 898 | H    | GLY | 55 | 32.662 | 39.354 | 39.611 |
| ATOM | 899 | CA   | GLY | 55 | 33.896 | 39.112 | 41.341 |
| ATOM | 900 | 2HA  | GLY | 55 | 33.785 | 40.189 | 41.455 |
| ATOM | 901 | 3HA  | GLY | 55 | 33.627 | 38.624 | 42.277 |
| ATOM | 902 | C    | GLY | 55 | 35.377 | 38.835 | 41.091 |
| ATOM | 903 | O    | GLY | 55 | 36.195 | 39.065 | 41.983 |
| ATOM | 904 | N    | VAL | 56 | 35.743 | 38.361 | 39.900 |
| ATOM | 905 | H    | VAL | 56 | 35.022 | 38.205 | 39.208 |
| ATOM | 906 | CA   | VAL | 56 | 37.138 | 38.172 | 39.495 |
| ATOM | 907 | HA   | VAL | 56 | 37.743 | 38.091 | 40.400 |
| ATOM | 908 | CB   | VAL | 56 | 37.363 | 36.892 | 38.672 |
| ATOM | 909 | HB   | VAL | 56 | 38.279 | 37.058 | 38.097 |
| ATOM | 910 | CG1  | VAL | 56 | 37.633 | 35.694 | 39.592 |
| ATOM | 911 | 1HG1 | VAL | 56 | 37.252 | 35.894 | 40.595 |
| ATOM | 912 | 2HG1 | VAL | 56 | 38.705 | 35.504 | 39.608 |
| ATOM | 913 | 3HG1 | VAL | 56 | 37.141 | 34.794 | 39.226 |
| ATOM | 914 | CG2  | VAL | 56 | 36.257 | 36.510 | 37.674 |
| ATOM | 915 | 1HG2 | VAL | 56 | 36.694 | 36.391 | 36.685 |
| ATOM | 916 | 2HG2 | VAL | 56 | 35.764 | 35.578 | 37.949 |
| ATOM | 917 | 3HG2 | VAL | 56 | 35.483 | 37.266 | 37.630 |
| ATOM | 918 | C    | VAL | 56 | 37.696 | 39.349 | 38.716 |
| ATOM | 919 | O    | VAL | 56 | 37.115 | 39.838 | 37.756 |
| ATOM | 920 | N    | ALA | 57 | 38.912 | 39.729 | 39.093 |
| ATOM | 921 | H    | ALA | 57 | 39.364 | 39.223 | 39.834 |
| ATOM | 922 | CA   | ALA | 57 | 39.666 | 40.758 | 38.407 |
| ATOM | 923 | HA   | ALA | 57 | 38.995 | 41.591 | 38.187 |
| ATOM | 924 | CB   | ALA | 57 | 40.770 | 41.229 | 39.347 |

|      |      |      |     |    |        |        |        |
|------|------|------|-----|----|--------|--------|--------|
| ATOM | 925  | 1HB  | ALA | 57 | 41.339 | 42.018 | 38.853 |
| ATOM | 926  | 2HB  | ALA | 57 | 40.339 | 41.605 | 40.275 |
| ATOM | 927  | 3HB  | ALA | 57 | 41.434 | 40.390 | 39.563 |
| ATOM | 928  | C    | ALA | 57 | 40.282 | 40.239 | 37.102 |
| ATOM | 929  | O    | ALA | 57 | 40.908 | 39.179 | 37.093 |
| ATOM | 930  | N    | ALA | 58 | 40.175 | 41.032 | 36.033 |
| ATOM | 931  | H    | ALA | 58 | 39.618 | 41.869 | 36.126 |
| ATOM | 932  | CA   | ALA | 58 | 40.844 | 40.811 | 34.744 |
| ATOM | 933  | HA   | ALA | 58 | 40.305 | 41.411 | 34.010 |
| ATOM | 934  | CB   | ALA | 58 | 42.267 | 41.371 | 34.838 |
| ATOM | 935  | 1HB  | ALA | 58 | 42.840 | 40.781 | 35.555 |
| ATOM | 936  | 2HB  | ALA | 58 | 42.237 | 42.413 | 35.152 |
| ATOM | 937  | 3HB  | ALA | 58 | 42.745 | 41.301 | 33.860 |
| ATOM | 938  | C    | ALA | 58 | 40.807 | 39.368 | 34.183 |
| ATOM | 939  | O    | ALA | 58 | 41.848 | 38.847 | 33.765 |
| ATOM | 940  | N    | PRO | 59 | 39.638 | 38.706 | 34.126 |
| ATOM | 941  | CD   | PRO | 59 | 38.324 | 39.182 | 34.530 |
| ATOM | 942  | ZHD  | PRO | 59 | 38.147 | 40.207 | 34.201 |
| ATOM | 943  | 3HD  | PRO | 59 | 38.232 | 39.107 | 35.612 |
| ATOM | 944  | CG   | PRO | 59 | 37.317 | 38.246 | 33.882 |
| ATOM | 945  | ZHG  | PRO | 59 | 37.014 | 38.650 | 32.915 |
| ATOM | 946  | 3HG  | PRO | 59 | 36.461 | 38.102 | 34.537 |
| ATOM | 947  | CB   | PRO | 59 | 38.100 | 36.948 | 33.685 |
| ATOM | 948  | 2HB  | PRO | 59 | 38.078 | 36.364 | 34.605 |
| ATOM | 949  | 3HB  | PRO | 59 | 37.717 | 36.358 | 32.850 |
| ATOM | 950  | CA   | PRO | 59 | 39.528 | 37.432 | 33.441 |
| ATOM | 951  | HA   | PRO | 59 | 40.231 | 36.718 | 33.873 |
| ATOM | 952  | C    | PRO | 59 | 39.841 | 37.612 | 31.953 |
| ATOM | 953  | O    | PRO | 59 | 39.396 | 38.556 | 31.295 |
| ATOM | 954  | N    | ALA | 60 | 40.613 | 36.671 | 31.420 |
| ATOM | 955  | H    | ALA | 60 | 40.954 | 35.930 | 32.016 |
| ATOM | 956  | CA   | ALA | 60 | 40.776 | 36.465 | 29.990 |
| ATOM | 957  | HA   | ALA | 60 | 40.260 | 37.258 | 29.444 |
| ATOM | 958  | CB   | ALA | 60 | 42.264 | 36.535 | 29.630 |
| ATOM | 959  | 1HB  | ALA | 60 | 42.656 | 37.522 | 29.882 |
| ATOM | 960  | 2HB  | ALA | 60 | 42.816 | 35.773 | 30.183 |
| ATOM | 961  | 3HB  | ALA | 60 | 42.388 | 36.362 | 28.560 |
| ATOM | 962  | C    | ALA | 60 | 40.129 | 35.129 | 29.612 |
| ATOM | 963  | O    | ALA | 60 | 40.121 | 34.194 | 30.413 |
| ATOM | 964  | N    | ASP | 61 | 39.571 | 35.050 | 28.411 |
| ATOM | 965  | H    | ASP | 61 | 39.658 | 35.829 | 27.776 |
| ATOM | 966  | CA   | ASP | 61 | 39.009 | 33.813 | 27.890 |
| ATOM | 967  | HA   | ASP | 61 | 38.732 | 33.171 | 28.722 |
| ATOM | 968  | CB   | ASP | 61 | 37.727 | 34.153 | 27.145 |
| ATOM | 969  | 2HB  | ASP | 61 | 37.099 | 34.782 | 27.775 |
| ATOM | 970  | 3HB  | ASP | 61 | 37.966 | 34.700 | 26.239 |
| ATOM | 971  | CG   | ASP | 61 | 36.953 | 32.896 | 26.792 |
| ATOM | 972  | OD1  | ASP | 61 | 37.475 | 32.068 | 26.033 |
| ATOM | 973  | OD2  | ASP | 61 | 35.798 | 32.795 | 27.280 |
| ATOM | 974  | C    | ASP | 61 | 40.052 | 33.116 | 27.000 |
| ATOM | 975  | O    | ASP | 61 | 40.533 | 33.763 | 26.065 |
| ATOM | 976  | N    | PRO | 62 | 40.439 | 31.851 | 27.274 |
| ATOM | 977  | CD   | PRO | 62 | 39.886 | 30.998 | 28.315 |
| ATOM | 978  | ZHD  | PRO | 62 | 38.852 | 30.744 | 28.078 |
| ATOM | 979  | 3HD  | PRO | 62 | 39.937 | 31.500 | 29.281 |
| ATOM | 980  | CG   | PRO | 62 | 40.733 | 29.729 | 28.377 |
| ATOM | 981  | ZHG  | PRO | 62 | 40.104 | 28.846 | 28.247 |
| ATOM | 982  | 3HG  | PRO | 62 | 41.256 | 29.679 | 29.332 |
| ATOM | 983  | CB   | PRO | 62 | 41.744 | 29.824 | 27.237 |
| ATOM | 984  | 2HB  | PRO | 62 | 42.760 | 29.673 | 27.607 |
| ATOM | 985  | 3HB  | PRO | 62 | 41.515 | 29.064 | 26.486 |
| ATOM | 986  | CA   | PRO | 62 | 41.604 | 31.228 | 26.640 |
| ATOM | 987  | HA   | PRO | 62 | 42.485 | 31.815 | 26.902 |
| ATOM | 988  | C    | PRO | 62 | 41.540 | 31.128 | 25.114 |
| ATOM | 989  | O    | PRO | 62 | 42.588 | 31.017 | 24.482 |
| ATOM | 990  | N    | GLU | 63 | 40.343 | 31.176 | 24.523 |
| ATOM | 991  | H    | GLU | 63 | 39.517 | 31.233 | 25.108 |
| ATOM | 992  | CA   | GLU | 63 | 40.162 | 31.131 | 23.069 |
| ATOM | 993  | HA   | GLU | 63 | 41.114 | 30.889 | 22.595 |
| ATOM | 994  | CB   | GLU | 63 | 39.188 | 30.002 | 22.702 |
| ATOM | 995  | 2HB  | GLU | 63 | 38.298 | 30.056 | 23.328 |
| ATOM | 996  | 3HB  | GLU | 63 | 38.893 | 30.117 | 21.658 |
| ATOM | 997  | CG   | GLU | 63 | 39.855 | 28.632 | 22.897 |
| ATOM | 998  | ZHG  | GLU | 63 | 40.844 | 28.642 | 22.432 |
| ATOM | 999  | 3HG  | GLU | 63 | 39.991 | 28.456 | 23.968 |
| ATOM | 1000 | CD   | GLU | 63 | 39.020 | 27.503 | 22.284 |
| ATOM | 1001 | OE1  | GLU | 63 | 38.959 | 27.433 | 21.030 |
| ATOM | 1002 | OE2  | GLU | 63 | 38.416 | 26.734 | 23.059 |
| ATOM | 1003 | C    | GLU | 63 | 39.760 | 32.487 | 22.469 |
| ATOM | 1004 | O    | GLU | 63 | 40.137 | 32.778 | 21.332 |
| ATOM | 1005 | N    | MET | 64 | 39.099 | 33.381 | 23.218 |
| ATOM | 1006 | H    | MET | 64 | 38.796 | 33.095 | 24.143 |
| ATOM | 1007 | CA   | MET | 64 | 38.662 | 34.683 | 22.684 |
| ATOM | 1008 | HA   | MET | 64 | 38.253 | 34.485 | 21.692 |
| ATOM | 1009 | CB   | MET | 64 | 37.534 | 35.303 | 23.534 |
| ATOM | 1010 | 2HB  | MET | 64 | 36.993 | 34.521 | 24.064 |
| ATOM | 1011 | 3HB  | MET | 64 | 37.960 | 35.988 | 24.268 |
| ATOM | 1012 | CG   | MET | 64 | 36.532 | 36.062 | 22.651 |
| ATOM | 1013 | ZHG  | MET | 64 | 37.069 | 36.859 | 22.137 |
| ATOM | 1014 | 3HG  | MET | 64 | 36.144 | 35.378 | 21.894 |
| ATOM | 1015 | SD   | MET | 64 | 35.119 | 36.815 | 23.516 |
| ATOM | 1016 | CE   | MET | 64 | 33.928 | 35.443 | 23.482 |
| ATOM | 1017 | 1HE  | MET | 64 | 32.998 | 35.757 | 23.958 |
| ATOM | 1018 | 2HE  | MET | 64 | 33.720 | 35.162 | 22.450 |
| ATOM | 1019 | 3HE  | MET | 64 | 34.331 | 34.580 | 24.013 |
| ATOM | 1020 | C    | MET | 64 | 39.836 | 35.652 | 22.467 |
| ATOM | 1021 | O    | MET | 64 | 39.687 | 36.642 | 21.756 |
| ATOM | 1022 | N    | VAL | 65 | 41.021 | 35.333 | 23.001 |
| ATOM | 1023 | H    | VAL | 65 | 41.050 | 34.529 | 23.617 |
| ATOM | 1024 | CA   | VAL | 65 | 42.299 | 35.982 | 22.651 |
| ATOM | 1025 | HA   | VAL | 65 | 42.162 | 37.062 | 22.721 |
| ATOM | 1026 | CB   | VAL | 65 | 43.422 | 35.574 | 23.622 |
| ATOM | 1027 | HB   | VAL | 65 | 44.333 | 36.090 | 23.319 |
| ATOM | 1028 | CG1  | VAL | 65 | 43.120 | 36.010 | 25.058 |
| ATOM | 1029 | 1HG1 | VAL | 65 | 44.021 | 35.894 | 25.658 |

|      |      |      |     |    |        |        |        |
|------|------|------|-----|----|--------|--------|--------|
| ATOM | 1030 | ZHG1 | VAL | 65 | 42.331 | 35.392 | 25.483 |
| ATOM | 1031 | 3HG1 | VAL | 65 | 42.810 | 37.054 | 25.072 |
| ATOM | 1032 | CG2  | VAL | 65 | 43.704 | 34.065 | 23.604 |
| ATOM | 1033 | 1HG2 | VAL | 65 | 44.098 | 33.765 | 22.633 |
| ATOM | 1034 | 2HG2 | VAL | 65 | 44.444 | 33.817 | 24.364 |
| ATOM | 1035 | 3HG2 | VAL | 65 | 42.796 | 33.499 | 23.807 |
| ATOM | 1036 | C    | VAL | 65 | 42.776 | 35.716 | 21.219 |
| ATOM | 1037 | O    | VAL | 65 | 43.658 | 36.425 | 20.743 |
| ATOM | 1038 | N    | THR | 66 | 42.218 | 34.723 | 20.518 |
| ATOM | 1039 | H    | THR | 66 | 41.537 | 34.122 | 20.970 |
| ATOM | 1040 | CA   | THR | 66 | 42.504 | 34.504 | 19.087 |
| ATOM | 1041 | HA   | THR | 66 | 43.553 | 34.731 | 18.907 |
| ATOM | 1042 | CB   | THR | 66 | 42.274 | 33.045 | 18.671 |
| ATOM | 1043 | HB   | THR | 66 | 42.583 | 32.953 | 17.629 |
| ATOM | 1044 | CG2  | THR | 66 | 43.089 | 32.043 | 19.490 |
| ATOM | 1045 | 1HG2 | THR | 66 | 43.050 | 31.073 | 18.995 |
| ATOM | 1046 | 2HG2 | THR | 66 | 44.128 | 32.367 | 19.549 |
| ATOM | 1047 | 3HG2 | THR | 66 | 42.686 | 31.944 | 20.498 |
| ATOM | 1048 | OG1  | THR | 66 | 40.913 | 32.699 | 18.755 |
| ATOM | 1049 | 1HG  | THR | 66 | 40.668 | 32.596 | 19.696 |
| ATOM | 1050 | C    | THR | 66 | 41.707 | 35.431 | 18.162 |
| ATOM | 1051 | O    | THR | 66 | 42.005 | 35.535 | 16.970 |
| ATOM | 1052 | N    | LEU | 67 | 40.711 | 36.143 | 18.697 |
| ATOM | 1053 | H    | LEU | 67 | 40.556 | 36.079 | 19.693 |
| ATOM | 1054 | CA   | LEU | 67 | 39.910 | 37.107 | 17.957 |
| ATOM | 1055 | HA   | LEU | 67 | 39.589 | 36.629 | 17.036 |
| ATOM | 1056 | CB   | LEU | 67 | 38.678 | 37.431 | 18.816 |
| ATOM | 1057 | ZHB  | LEU | 67 | 38.264 | 36.505 | 19.218 |
| ATOM | 1058 | 3HB  | LEU | 67 | 39.012 | 38.039 | 19.659 |
| ATOM | 1059 | CG   | LEU | 67 | 37.567 | 38.190 | 18.074 |
| ATOM | 1060 | HG   | LEU | 67 | 37.994 | 39.073 | 17.600 |
| ATOM | 1061 | CD1  | LEU | 67 | 36.910 | 37.317 | 16.998 |
| ATOM | 1062 | 1HD1 | LEU | 67 | 37.599 | 37.143 | 16.177 |
| ATOM | 1063 | 2HD1 | LEU | 67 | 36.634 | 36.355 | 17.427 |
| ATOM | 1064 | 3HD1 | LEU | 67 | 36.019 | 37.809 | 16.615 |
| ATOM | 1065 | CD2  | LEU | 67 | 36.478 | 38.637 | 19.059 |
| ATOM | 1066 | 1HD2 | LEU | 67 | 35.545 | 38.098 | 18.898 |
| ATOM | 1067 | 2HD2 | LEU | 67 | 36.793 | 38.468 | 20.090 |
| ATOM | 1068 | 3HD2 | LEU | 67 | 36.302 | 39.703 | 18.931 |
| ATOM | 1069 | C    | LEU | 67 | 40.745 | 38.368 | 17.646 |
| ATOM | 1070 | O    | LEU | 67 | 41.267 | 38.984 | 18.577 |
| ATOM | 1071 | N    | PRO | 68 | 40.863 | 38.808 | 16.376 |
| ATOM | 1072 | CD   | PRO | 68 | 40.356 | 38.169 | 15.174 |
| ATOM | 1073 | ZHD  | PRO | 68 | 39.272 | 38.270 | 15.136 |
| ATOM | 1074 | 3HD  | PRO | 68 | 40.643 | 37.116 | 15.147 |
| ATOM | 1075 | CG   | PRO | 68 | 40.979 | 38.897 | 13.982 |
| ATOM | 1076 | ZHG  | PRO | 68 | 40.206 | 39.177 | 13.264 |
| ATOM | 1077 | 3HG  | PRO | 68 | 41.716 | 38.249 | 13.502 |
| ATOM | 1078 | CB   | PRO | 68 | 41.671 | 40.143 | 14.540 |
| ATOM | 1079 | ZHB  | PRO | 68 | 42.716 | 40.163 | 14.226 |
| ATOM | 1080 | 3HB  | PRO | 68 | 41.164 | 41.042 | 14.187 |
| ATOM | 1081 | CA   | PRO | 68 | 41.587 | 40.036 | 16.064 |
| ATOM | 1082 | HA   | PRO | 68 | 42.597 | 39.944 | 16.466 |
| ATOM | 1083 | C    | PRO | 68 | 40.912 | 41.261 | 16.690 |
| ATOM | 1084 | O    | PRO | 68 | 39.684 | 41.378 | 16.678 |
| ATOM | 1085 | N    | LEU | 69 | 41.731 | 42.163 | 17.230 |
| ATOM | 1086 | H    | LEU | 69 | 42.720 | 41.974 | 17.228 |
| ATOM | 1087 | CA   | LEU | 69 | 41.287 | 43.259 | 18.075 |
| ATOM | 1088 | HA   | LEU | 69 | 40.312 | 43.616 | 17.741 |
| ATOM | 1089 | CB   | LEU | 69 | 41.221 | 42.690 | 19.503 |
| ATOM | 1090 | ZHB  | LEU | 69 | 40.876 | 41.654 | 19.474 |
| ATOM | 1091 | 3HB  | LEU | 69 | 42.231 | 42.670 | 19.914 |
| ATOM | 1092 | CG   | LEU | 69 | 40.310 | 43.473 | 20.460 |
| ATOM | 1093 | HG   | LEU | 69 | 40.579 | 44.534 | 20.442 |
| ATOM | 1094 | CD1  | LEU | 69 | 38.833 | 43.306 | 20.102 |
| ATOM | 1095 | 1HD1 | LEU | 69 | 38.590 | 43.886 | 19.216 |
| ATOM | 1096 | 2HD1 | LEU | 69 | 38.223 | 43.666 | 20.924 |
| ATOM | 1097 | 3HD1 | LEU | 69 | 38.605 | 42.255 | 19.932 |
| ATOM | 1098 | CD2  | LEU | 69 | 40.467 | 42.946 | 21.893 |
| ATOM | 1099 | 1HD2 | LEU | 69 | 41.407 | 43.310 | 22.308 |
| ATOM | 1100 | 2HD2 | LEU | 69 | 39.651 | 43.301 | 22.527 |
| ATOM | 1101 | 3HD2 | LEU | 69 | 40.453 | 41.850 | 21.891 |
| ATOM | 1102 | C    | LEU | 69 | 42.299 | 44.408 | 18.036 |
| ATOM | 1103 | O    | LEU | 69 | 43.501 | 44.165 | 18.137 |
| ATOM | 1104 | N    | GLN | 70 | 41.841 | 45.661 | 17.983 |
| ATOM | 1105 | H    | GLN | 70 | 40.854 | 45.815 | 17.807 |
| ATOM | 1106 | CA   | GLN | 70 | 42.713 | 46.826 | 18.164 |
| ATOM | 1107 | HA   | GLN | 70 | 43.728 | 46.496 | 18.384 |
| ATOM | 1108 | CB   | GLN | 70 | 42.822 | 47.623 | 16.861 |
| ATOM | 1109 | ZHB  | GLN | 70 | 41.828 | 47.848 | 16.474 |
| ATOM | 1110 | 3HB  | GLN | 70 | 43.330 | 48.558 | 17.095 |
| ATOM | 1111 | CG   | GLN | 70 | 43.636 | 46.870 | 15.795 |
| ATOM | 1112 | ZHG  | GLN | 70 | 44.485 | 46.363 | 16.257 |
| ATOM | 1113 | 3HG  | GLN | 70 | 43.005 | 46.113 | 15.324 |
| ATOM | 1114 | CD   | GLN | 70 | 44.195 | 47.816 | 14.742 |
| ATOM | 1115 | OE1  | GLN | 70 | 44.843 | 48.807 | 15.039 |
| ATOM | 1116 | NE2  | GLN | 70 | 43.982 | 47.551 | 13.472 |
| ATOM | 1117 | 1HE2 | GLN | 70 | 43.423 | 46.757 | 13.210 |
| ATOM | 1118 | 2HE2 | GLN | 70 | 44.405 | 48.171 | 12.810 |
| ATOM | 1119 | C    | GLN | 70 | 42.242 | 47.689 | 19.349 |
| ATOM | 1120 | O    | GLN | 70 | 41.427 | 48.596 | 19.148 |
| ATOM | 1121 | N    | PRO | 71 | 42.761 | 47.447 | 20.577 |
| ATOM | 1122 | CD   | PRO | 71 | 43.811 | 46.478 | 20.866 |
| ATOM | 1123 | ZHD  | PRO | 71 | 44.748 | 46.805 | 20.412 |
| ATOM | 1124 | 3HD  | PRO | 71 | 43.542 | 45.491 | 20.485 |
| ATOM | 1125 | CG   | PRO | 71 | 43.975 | 46.406 | 22.380 |
| ATOM | 1126 | ZHG  | PRO | 71 | 45.019 | 46.574 | 22.652 |
| ATOM | 1127 | 3HG  | PRO | 71 | 43.650 | 45.430 | 22.740 |
| ATOM | 1128 | CB   | PRO | 71 | 43.084 | 47.502 | 22.965 |
| ATOM | 1129 | ZHB  | PRO | 71 | 42.392 | 47.073 | 23.689 |
| ATOM | 1130 | 3HB  | PRO | 71 | 43.706 | 48.250 | 23.460 |
| ATOM | 1131 | CA   | PRO | 71 | 42.304 | 48.121 | 21.797 |
| ATOM | 1132 | HA   | PRO | 71 | 41.241 | 47.921 | 21.935 |
| ATOM | 1133 | C    | PRO | 71 | 42.503 | 49.642 | 21.781 |
| ATOM | 1134 | O    | PRO | 71 | 41.770 | 50.366 | 22.451 |

|      |      |      |     |    |        |        |        |
|------|------|------|-----|----|--------|--------|--------|
| ATOM | 1135 | N    | SER | 72 | 43.490 | 50.122 | 21.022 |
| ATOM | 1136 | H    | SER | 72 | 44.152 | 49.472 | 20.630 |
| ATOM | 1137 | CA   | SER | 72 | 43.813 | 51.547 | 20.894 |
| ATOM | 1138 | HA   | SER | 72 | 43.532 | 52.048 | 21.821 |
| ATOM | 1139 | CB   | SER | 72 | 45.320 | 51.738 | 20.691 |
| ATOM | 1140 | 2HB  | SER | 72 | 45.557 | 51.609 | 19.634 |
| ATOM | 1141 | 3HB  | SER | 72 | 45.590 | 52.751 | 20.990 |
| ATOM | 1142 | OG   | SER | 72 | 46.075 | 50.800 | 21.440 |
| ATOM | 1143 | HG   | SER | 72 | 47.008 | 51.010 | 21.338 |
| ATOM | 1144 | C    | SER | 72 | 43.066 | 52.257 | 19.760 |
| ATOM | 1145 | O    | SER | 72 | 43.263 | 53.456 | 19.572 |
| ATOM | 1146 | N    | SER | 73 | 42.255 | 51.546 | 18.968 |
| ATOM | 1147 | H    | SER | 73 | 42.061 | 50.579 | 19.197 |
| ATOM | 1148 | CA   | SER | 73 | 41.520 | 52.151 | 17.854 |
| ATOM | 1149 | HA   | SER | 73 | 42.157 | 52.921 | 17.416 |
| ATOM | 1150 | CB   | SER | 73 | 41.245 | 51.133 | 16.738 |
| ATOM | 1151 | 2HB  | SER | 73 | 41.035 | 51.679 | 15.816 |
| ATOM | 1152 | 3HB  | SER | 73 | 42.133 | 50.521 | 16.575 |
| ATOM | 1153 | OG   | SER | 73 | 40.137 | 50.306 | 17.037 |
| ATOM | 1154 | HG   | SER | 73 | 40.461 | 49.494 | 17.457 |
| ATOM | 1155 | C    | SER | 73 | 40.237 | 52.844 | 18.320 |
| ATOM | 1156 | O    | SER | 73 | 39.630 | 52.480 | 19.332 |
| ATOM | 1157 | N    | THR | 74 | 39.781 | 53.822 | 17.539 |
| ATOM | 1158 | H    | THR | 74 | 40.299 | 54.085 | 16.711 |
| ATOM | 1159 | CA   | THR | 74 | 38.482 | 54.482 | 17.731 |
| ATOM | 1160 | HA   | THR | 74 | 38.471 | 54.941 | 18.718 |
| ATOM | 1161 | CB   | THR | 74 | 38.256 | 55.568 | 16.656 |
| ATOM | 1162 | HB   | THR | 74 | 37.214 | 55.545 | 16.338 |
| ATOM | 1163 | CG2  | THR | 74 | 38.565 | 56.979 | 17.166 |
| ATOM | 1164 | 1HG2 | THR | 74 | 37.624 | 57.511 | 17.300 |
| ATOM | 1165 | 2HG2 | THR | 74 | 39.179 | 57.532 | 16.453 |
| ATOM | 1166 | 3HG2 | THR | 74 | 39.091 | 56.948 | 18.120 |
| ATOM | 1167 | OG1  | THR | 74 | 39.063 | 55.346 | 15.517 |
| ATOM | 1168 | 1HG  | THR | 74 | 38.810 | 55.994 | 14.850 |
| ATOM | 1169 | C    | THR | 74 | 37.319 | 53.488 | 17.710 |
| ATOM | 1170 | O    | THR | 74 | 36.415 | 53.605 | 18.533 |
| ATOM | 1171 | N    | MET | 75 | 37.366 | 52.468 | 16.847 |
| ATOM | 1172 | H    | MET | 75 | 38.139 | 52.414 | 16.202 |
| ATOM | 1173 | CA   | MET | 75 | 36.331 | 51.427 | 16.777 |
| ATOM | 1174 | HA   | MET | 75 | 35.353 | 51.907 | 16.817 |
| ATOM | 1175 | CB   | MET | 75 | 36.435 | 50.677 | 15.437 |
| ATOM | 1176 | 2HB  | MET | 75 | 37.393 | 50.158 | 15.382 |
| ATOM | 1177 | 3HB  | MET | 75 | 35.643 | 49.933 | 15.387 |
| ATOM | 1178 | CG   | MET | 75 | 36.311 | 51.619 | 14.226 |
| ATOM | 1179 | 2HG  | MET | 75 | 37.266 | 52.131 | 14.102 |
| ATOM | 1180 | 3HG  | MET | 75 | 36.145 | 51.024 | 13.326 |
| ATOM | 1181 | SD   | MET | 75 | 35.007 | 52.888 | 14.356 |
| ATOM | 1182 | CE   | MET | 75 | 35.541 | 54.027 | 13.053 |
| ATOM | 1183 | 1HE  | MET | 75 | 36.598 | 53.882 | 12.831 |
| ATOM | 1184 | 2HE  | MET | 75 | 34.963 | 53.847 | 12.150 |
| ATOM | 1185 | 3HE  | MET | 75 | 35.375 | 55.052 | 13.376 |
| ATOM | 1186 | C    | MET | 75 | 36.373 | 50.477 | 17.983 |
| ATOM | 1187 | O    | MET | 75 | 35.323 | 50.075 | 18.485 |
| ATOM | 1188 | N    | GLY | 76 | 37.568 | 50.227 | 18.532 |
| ATOM | 1189 | H    | GLY | 76 | 38.395 | 50.571 | 18.057 |
| ATOM | 1190 | CA   | GLY | 76 | 37.751 | 49.558 | 19.821 |
| ATOM | 1191 | 2HA  | GLY | 76 | 37.325 | 48.562 | 19.772 |
| ATOM | 1192 | 3HA  | GLY | 76 | 38.818 | 49.475 | 20.029 |
| ATOM | 1193 | C    | GLY | 76 | 37.091 | 50.303 | 20.983 |
| ATOM | 1194 | O    | GLY | 76 | 36.450 | 49.679 | 21.830 |
| ATOM | 1195 | N    | GLN | 77 | 37.167 | 51.639 | 20.999 |
| ATOM | 1196 | H    | GLN | 77 | 37.725 | 52.100 | 20.289 |
| ATOM | 1197 | CA   | GLN | 77 | 36.456 | 52.451 | 21.992 |
| ATOM | 1198 | HA   | GLN | 77 | 36.583 | 51.973 | 22.964 |
| ATOM | 1199 | CB   | GLN | 77 | 37.047 | 53.869 | 22.082 |
| ATOM | 1200 | 2HB  | GLN | 77 | 37.416 | 54.190 | 21.104 |
| ATOM | 1201 | 3HB  | GLN | 77 | 36.247 | 54.552 | 22.379 |
| ATOM | 1202 | CG   | GLN | 77 | 38.187 | 53.937 | 23.113 |
| ATOM | 1203 | 2HG  | GLN | 77 | 39.091 | 53.538 | 22.658 |
| ATOM | 1204 | 3HG  | GLN | 77 | 37.936 | 53.331 | 23.980 |
| ATOM | 1205 | CD   | GLN | 77 | 38.430 | 55.349 | 23.630 |
| ATOM | 1206 | OE1  | GLN | 77 | 37.537 | 56.097 | 23.960 |
| ATOM | 1207 | NE2  | GLN | 77 | 39.672 | 55.749 | 23.812 |
| ATOM | 1208 | 1HE2 | GLN | 77 | 39.774 | 56.677 | 24.181 |
| ATOM | 1209 | 2HE2 | GLN | 77 | 40.438 | 55.154 | 23.566 |
| ATOM | 1210 | C    | GLN | 77 | 34.936 | 52.487 | 21.771 |
| ATOM | 1211 | O    | GLN | 77 | 34.201 | 52.346 | 22.747 |
| ATOM | 1212 | N    | VAL | 78 | 34.451 | 52.593 | 20.527 |
| ATOM | 1213 | H    | VAL | 78 | 35.102 | 52.750 | 19.762 |
| ATOM | 1214 | CA   | VAL | 78 | 33.003 | 52.540 | 20.240 |
| ATOM | 1215 | HA   | VAL | 78 | 32.514 | 53.315 | 20.832 |
| ATOM | 1216 | CB   | VAL | 78 | 32.711 | 52.817 | 18.750 |
| ATOM | 1217 | HB   | VAL | 78 | 33.340 | 52.165 | 18.144 |
| ATOM | 1218 | CG1  | VAL | 78 | 31.248 | 52.558 | 18.367 |
| ATOM | 1219 | 1HG1 | VAL | 78 | 30.573 | 53.154 | 18.973 |
| ATOM | 1220 | 2HG1 | VAL | 78 | 31.092 | 52.820 | 17.330 |
| ATOM | 1221 | 3HG1 | VAL | 78 | 31.002 | 51.504 | 18.473 |
| ATOM | 1222 | CG2  | VAL | 78 | 33.022 | 54.274 | 18.382 |
| ATOM | 1223 | 1HG2 | VAL | 78 | 32.390 | 54.952 | 18.956 |
| ATOM | 1224 | 2HG2 | VAL | 78 | 34.063 | 54.504 | 18.595 |
| ATOM | 1225 | 3HG2 | VAL | 78 | 32.844 | 54.428 | 17.318 |
| ATOM | 1226 | C    | VAL | 78 | 32.398 | 51.201 | 20.681 |
| ATOM | 1227 | O    | VAL | 78 | 31.387 | 51.196 | 21.384 |
| ATOM | 1228 | N    | GLY | 79 | 33.040 | 50.071 | 20.354 |
| ATOM | 1229 | H    | GLY | 79 | 33.857 | 50.135 | 19.750 |
| ATOM | 1230 | CA   | GLY | 79 | 32.600 | 48.741 | 20.796 |
| ATOM | 1231 | 2HA  | GLY | 79 | 31.607 | 48.535 | 20.399 |
| ATOM | 1232 | 3HA  | GLY | 79 | 33.288 | 47.998 | 20.397 |
| ATOM | 1233 | C    | GLY | 79 | 32.569 | 48.596 | 22.325 |
| ATOM | 1234 | O    | GLY | 79 | 31.658 | 47.986 | 22.886 |
| ATOM | 1235 | N    | ARG | 80 | 33.521 | 49.223 | 23.028 |
| ATOM | 1236 | H    | ARG | 80 | 34.236 | 49.719 | 22.507 |
| ATOM | 1237 | CA   | ARG | 80 | 33.610 | 49.250 | 24.500 |
| ATOM | 1238 | HA   | ARG | 80 | 33.471 | 48.238 | 24.886 |
| ATOM | 1239 | CB   | ARG | 80 | 35.019 | 49.726 | 24.862 |

|      |      |      |     |    |        |        |        |
|------|------|------|-----|----|--------|--------|--------|
| ATOM | 1240 | ZHB  | ARG | 80 | 35.727 | 49.148 | 24.270 |
| ATOM | 1241 | 3HB  | ARG | 80 | 35.121 | 50.772 | 24.572 |
| ATOM | 1242 | CG   | ARG | 80 | 35.413 | 49.586 | 26.339 |
| ATOM | 1243 | ZHG  | ARG | 80 | 34.813 | 50.251 | 26.963 |
| ATOM | 1244 | 3HG  | ARG | 80 | 35.303 | 48.553 | 26.673 |
| ATOM | 1245 | CD   | ARG | 80 | 36.884 | 49.998 | 26.382 |
| ATOM | 1246 | ZHD  | ARG | 80 | 37.461 | 49.281 | 25.796 |
| ATOM | 1247 | 3HD  | ARG | 80 | 36.974 | 50.984 | 25.919 |
| ATOM | 1248 | NE   | ARG | 80 | 37.449 | 50.069 | 27.735 |
| ATOM | 1249 | HE   | ARG | 80 | 36.875 | 49.762 | 28.505 |
| ATOM | 1250 | CZ   | ARG | 80 | 38.655 | 50.541 | 27.989 |
| ATOM | 1251 | NH1  | ARG | 80 | 39.090 | 50.644 | 29.209 |
| ATOM | 1252 | 1HH1 | ARG | 80 | 38.512 | 50.350 | 29.977 |
| ATOM | 1253 | 2HH1 | ARG | 80 | 40.005 | 51.014 | 29.385 |
| ATOM | 1254 | NH2  | ARG | 80 | 39.461 | 50.924 | 27.035 |
| ATOM | 1255 | 1HH2 | ARG | 80 | 39.167 | 50.814 | 26.079 |
| ATOM | 1256 | 2HH2 | ARG | 80 | 40.368 | 51.296 | 27.244 |
| ATOM | 1257 | C    | ARG | 80 | 32.540 | 50.124 | 25.154 |
| ATOM | 1258 | O    | ARG | 80 | 31.968 | 49.715 | 26.158 |
| ATOM | 1259 | N    | GLN | 81 | 32.226 | 51.289 | 24.587 |
| ATOM | 1260 | H    | GLN | 81 | 32.742 | 51.585 | 23.765 |
| ATOM | 1261 | CA   | GLN | 81 | 31.111 | 52.121 | 25.057 |
| ATOM | 1262 | HA   | GLN | 81 | 31.191 | 52.245 | 26.140 |
| ATOM | 1263 | CB   | GLN | 81 | 31.185 | 53.509 | 24.405 |
| ATOM | 1264 | ZHB  | GLN | 81 | 31.523 | 53.408 | 23.373 |
| ATOM | 1265 | 3HB  | GLN | 81 | 30.190 | 53.960 | 24.410 |
| ATOM | 1266 | CG   | GLN | 81 | 32.139 | 54.439 | 25.170 |
| ATOM | 1267 | ZHG  | GLN | 81 | 31.784 | 54.539 | 26.197 |
| ATOM | 1268 | 3HG  | GLN | 81 | 33.137 | 54.005 | 25.188 |
| ATOM | 1269 | CD   | GLN | 81 | 32.236 | 55.820 | 24.533 |
| ATOM | 1270 | OE1  | GLN | 81 | 32.481 | 55.975 | 23.351 |
| ATOM | 1271 | NE2  | GLN | 81 | 32.069 | 56.879 | 25.294 |
| ATOM | 1272 | 1HE2 | GLN | 81 | 32.161 | 57.770 | 24.838 |
| ATOM | 1273 | 2HE2 | GLN | 81 | 31.867 | 56.790 | 26.272 |
| ATOM | 1274 | C    | GLN | 81 | 29.757 | 51.440 | 24.813 |
| ATOM | 1275 | O    | GLN | 81 | 28.906 | 51.460 | 25.697 |
| ATOM | 1276 | N    | LEU | 82 | 29.585 | 50.744 | 23.687 |
| ATOM | 1277 | H    | LEU | 82 | 30.281 | 50.826 | 22.950 |
| ATOM | 1278 | CA   | LEU | 82 | 28.430 | 49.871 | 23.466 |
| ATOM | 1279 | HA   | LEU | 82 | 27.527 | 50.466 | 23.585 |
| ATOM | 1280 | CB   | LEU | 82 | 28.525 | 49.308 | 22.049 |
| ATOM | 1281 | ZHB  | LEU | 82 | 29.573 | 49.213 | 21.770 |
| ATOM | 1282 | 3HB  | LEU | 82 | 28.088 | 48.310 | 22.019 |
| ATOM | 1283 | CG   | LEU | 82 | 27.800 | 50.199 | 21.025 |
| ATOM | 1284 | HG   | LEU | 82 | 28.043 | 51.250 | 21.218 |
| ATOM | 1285 | CD1  | LEU | 82 | 28.244 | 49.840 | 19.601 |
| ATOM | 1286 | 1HD1 | LEU | 82 | 28.437 | 48.768 | 19.520 |
| ATOM | 1287 | 2HD1 | LEU | 82 | 27.478 | 50.112 | 18.874 |
| ATOM | 1288 | 3HD1 | LEU | 82 | 29.143 | 50.411 | 19.379 |
| ATOM | 1289 | CD2  | LEU | 82 | 26.277 | 50.023 | 21.062 |
| ATOM | 1290 | 1HD2 | LEU | 82 | 25.880 | 50.424 | 21.990 |
| ATOM | 1291 | 2HD2 | LEU | 82 | 25.825 | 50.576 | 20.239 |
| ATOM | 1292 | 3HD2 | LEU | 82 | 26.019 | 48.966 | 20.969 |
| ATOM | 1293 | C    | LEU | 82 | 28.332 | 48.718 | 24.471 |
| ATOM | 1294 | O    | LEU | 82 | 27.235 | 48.364 | 24.898 |
| ATOM | 1295 | N    | ALA | 83 | 29.466 | 48.134 | 24.868 |
| ATOM | 1296 | H    | ALA | 83 | 30.323 | 48.365 | 24.387 |
| ATOM | 1297 | CA   | ALA | 83 | 29.504 | 47.128 | 25.931 |
| ATOM | 1298 | HA   | ALA | 83 | 28.760 | 46.366 | 25.712 |
| ATOM | 1299 | CB   | ALA | 83 | 30.875 | 46.441 | 25.959 |
| ATOM | 1300 | 1HB  | ALA | 83 | 30.914 | 45.762 | 26.812 |
| ATOM | 1301 | 2HB  | ALA | 83 | 31.009 | 45.869 | 25.040 |
| ATOM | 1302 | 3HB  | ALA | 83 | 31.676 | 47.171 | 26.058 |
| ATOM | 1303 | C    | ALA | 83 | 29.102 | 47.704 | 27.294 |
| ATOM | 1304 | O    | ALA | 83 | 28.320 | 47.072 | 27.996 |
| ATOM | 1305 | N    | ILE | 84 | 29.541 | 48.919 | 27.634 |
| ATOM | 1306 | H    | ILE | 84 | 30.212 | 49.391 | 27.039 |
| ATOM | 1307 | CA   | ILE | 84 | 29.200 | 49.538 | 28.918 |
| ATOM | 1308 | HA   | ILE | 84 | 29.388 | 48.785 | 29.674 |
| ATOM | 1309 | CB   | ILE | 84 | 30.155 | 50.735 | 29.195 |
| ATOM | 1310 | HB   | ILE | 84 | 30.971 | 50.676 | 28.470 |
| ATOM | 1311 | CG2  | ILE | 84 | 29.522 | 52.136 | 29.039 |
| ATOM | 1312 | 1HG2 | ILE | 84 | 29.550 | 52.444 | 27.991 |
| ATOM | 1313 | 2HG2 | ILE | 84 | 30.069 | 52.868 | 29.626 |
| ATOM | 1314 | 3HG2 | ILE | 84 | 28.493 | 52.161 | 29.414 |
| ATOM | 1315 | CG1  | ILE | 84 | 30.786 | 50.613 | 30.597 |
| ATOM | 1316 | ZHG1 | ILE | 84 | 30.042 | 50.923 | 31.331 |
| ATOM | 1317 | 3HG1 | ILE | 84 | 31.034 | 49.572 | 30.781 |
| ATOM | 1318 | CD1  | ILE | 84 | 32.080 | 51.417 | 30.800 |
| ATOM | 1319 | 1HD1 | ILE | 84 | 32.393 | 51.285 | 31.828 |
| ATOM | 1320 | 2HD1 | ILE | 84 | 32.863 | 51.049 | 30.139 |
| ATOM | 1321 | 3HD1 | ILE | 84 | 31.929 | 52.477 | 30.619 |
| ATOM | 1322 | C    | ILE | 84 | 27.702 | 49.833 | 29.073 |
| ATOM | 1323 | O    | ILE | 84 | 27.171 | 49.640 | 30.162 |
| ATOM | 1324 | N    | ILE | 85 | 27.003 | 50.189 | 27.988 |
| ATOM | 1325 | H    | ILE | 85 | 27.497 | 50.336 | 27.117 |
| ATOM | 1326 | CA   | ILE | 85 | 25.538 | 50.317 | 28.012 |
| ATOM | 1327 | HA   | ILE | 85 | 25.261 | 51.020 | 28.799 |
| ATOM | 1328 | CB   | ILE | 85 | 25.014 | 50.858 | 26.665 |
| ATOM | 1329 | HB   | ILE | 85 | 25.362 | 50.181 | 25.879 |
| ATOM | 1330 | CG2  | ILE | 85 | 23.469 | 50.925 | 26.601 |
| ATOM | 1331 | 1HG2 | ILE | 85 | 23.116 | 50.378 | 25.726 |
| ATOM | 1332 | 2HG2 | ILE | 85 | 23.114 | 51.952 | 26.538 |
| ATOM | 1333 | 3HG2 | ILE | 85 | 23.002 | 50.510 | 27.491 |
| ATOM | 1334 | CG1  | ILE | 85 | 25.567 | 52.277 | 26.399 |
| ATOM | 1335 | ZHG1 | ILE | 85 | 25.122 | 52.964 | 27.121 |
| ATOM | 1336 | 3HG1 | ILE | 85 | 26.644 | 52.294 | 26.550 |
| ATOM | 1337 | CD1  | ILE | 85 | 25.284 | 52.792 | 24.981 |
| ATOM | 1338 | 1HD1 | ILE | 85 | 25.682 | 52.098 | 24.241 |
| ATOM | 1339 | 2HD1 | ILE | 85 | 24.214 | 52.915 | 24.816 |
| ATOM | 1340 | 3HD1 | ILE | 85 | 25.762 | 53.762 | 24.857 |
| ATOM | 1341 | C    | ILE | 85 | 24.896 | 48.972 | 28.374 |
| ATOM | 1342 | O    | ILE | 85 | 23.980 | 48.953 | 29.187 |
| ATOM | 1343 | N    | GLY | 86 | 25.427 | 47.861 | 27.848 |
| ATOM | 1344 | H    | GLY | 86 | 26.234 | 47.973 | 27.251 |

|      |      |      |     |    |        |        |        |
|------|------|------|-----|----|--------|--------|--------|
| ATOM | 1345 | CA   | GLY | 86 | 24.976 | 46.491 | 28.119 |
| ATOM | 1346 | ZHA  | GLY | 86 | 23.981 | 46.352 | 27.705 |
| ATOM | 1347 | 3HA  | GLY | 86 | 25.653 | 45.805 | 27.613 |
| ATOM | 1348 | C    | GLY | 86 | 24.931 | 46.075 | 29.595 |
| ATOM | 1349 | O    | GLY | 86 | 24.302 | 45.067 | 29.908 |
| ATOM | 1350 | N    | ASP | 87 | 25.575 | 46.824 | 30.490 |
| ATOM | 1351 | H    | ASP | 87 | 26.084 | 47.636 | 30.166 |
| ATOM | 1352 | CA   | ASP | 87 | 25.502 | 46.625 | 31.938 |
| ATOM | 1353 | HA   | ASP | 87 | 25.328 | 45.568 | 32.142 |
| ATOM | 1354 | CB   | ASP | 87 | 26.870 | 46.994 | 32.522 |
| ATOM | 1355 | ZHB  | ASP | 87 | 27.655 | 46.583 | 31.883 |
| ATOM | 1356 | 3HB  | ASP | 87 | 26.981 | 48.000 | 32.543 |
| ATOM | 1357 | CG   | ASP | 87 | 27.054 | 46.400 | 33.911 |
| ATOM | 1358 | OD1  | ASP | 87 | 26.978 | 45.151 | 33.979 |
| ATOM | 1359 | OD2  | ASP | 87 | 27.313 | 47.186 | 34.846 |
| ATOM | 1360 | C    | ASP | 87 | 24.340 | 47.414 | 32.585 |
| ATOM | 1361 | O    | ASP | 87 | 23.523 | 46.840 | 33.303 |
| ATOM | 1362 | N    | ASP | 88 | 24.178 | 48.690 | 32.223 |
| ATOM | 1363 | H    | ASP | 88 | 24.847 | 49.067 | 31.566 |
| ATOM | 1364 | CA   | ASP | 88 | 23.083 | 49.587 | 32.650 |
| ATOM | 1365 | HA   | ASP | 88 | 23.139 | 49.715 | 33.732 |
| ATOM | 1366 | CB   | ASP | 88 | 23.348 | 50.940 | 31.937 |
| ATOM | 1367 | ZHB  | ASP | 88 | 24.428 | 51.111 | 31.944 |
| ATOM | 1368 | 3HB  | ASP | 88 | 23.057 | 50.825 | 30.892 |
| ATOM | 1369 | CG   | ASP | 88 | 22.692 | 52.228 | 32.482 |
| ATOM | 1370 | OD1  | ASP | 88 | 23.364 | 53.292 | 32.500 |
| ATOM | 1371 | OD2  | ASP | 88 | 21.454 | 52.248 | 32.706 |
| ATOM | 1372 | C    | ASP | 88 | 21.702 | 48.973 | 32.297 |
| ATOM | 1373 | O    | ASP | 88 | 20.764 | 48.950 | 33.096 |
| ATOM | 1374 | N    | ILE | 89 | 21.619 | 48.356 | 31.111 |
| ATOM | 1375 | H    | ILE | 89 | 22.438 | 48.441 | 30.520 |
| ATOM | 1376 | CA   | ILE | 89 | 20.448 | 47.639 | 30.560 |
| ATOM | 1377 | HA   | ILE | 89 | 19.572 | 47.963 | 31.124 |
| ATOM | 1378 | CB   | ILE | 89 | 20.226 | 48.022 | 29.082 |
| ATOM | 1379 | HB   | ILE | 89 | 19.354 | 47.487 | 28.711 |
| ATOM | 1380 | CG2  | ILE | 89 | 19.890 | 49.519 | 28.967 |
| ATOM | 1381 | 1HG2 | ILE | 89 | 20.779 | 50.128 | 29.141 |
| ATOM | 1382 | 2HG2 | ILE | 89 | 19.492 | 49.730 | 27.974 |
| ATOM | 1383 | 3HG2 | ILE | 89 | 19.135 | 49.791 | 29.709 |
| ATOM | 1384 | CG1  | ILE | 89 | 21.457 | 47.634 | 28.231 |
| ATOM | 1385 | ZHG1 | ILE | 89 | 21.798 | 48.508 | 27.678 |
| ATOM | 1386 | 3HG1 | ILE | 89 | 22.259 | 47.302 | 28.884 |
| ATOM | 1387 | CD1  | ILE | 89 | 21.255 | 46.482 | 27.252 |
| ATOM | 1388 | 1HD1 | ILE | 89 | 20.279 | 46.539 | 26.787 |
| ATOM | 1389 | 2HD1 | ILE | 89 | 22.023 | 46.553 | 26.484 |
| ATOM | 1390 | 3HD1 | ILE | 89 | 21.348 | 45.527 | 27.764 |
| ATOM | 1391 | C    | ILE | 89 | 20.489 | 46.107 | 30.715 |
| ATOM | 1392 | O    | ILE | 89 | 19.726 | 45.397 | 30.053 |
| ATOM | 1393 | N    | ASN | 90 | 21.348 | 45.567 | 31.586 |
| ATOM | 1394 | H    | ASN | 90 | 22.001 | 46.185 | 32.065 |
| ATOM | 1395 | CA   | ASN | 90 | 21.393 | 44.129 | 31.898 |
| ATOM | 1396 | HA   | ASN | 90 | 21.742 | 43.581 | 31.022 |
| ATOM | 1397 | CB   | ASN | 90 | 22.384 | 43.948 | 33.058 |
| ATOM | 1398 | ZHB  | ASN | 90 | 23.381 | 44.228 | 32.720 |
| ATOM | 1399 | 3HB  | ASN | 90 | 22.111 | 44.610 | 33.879 |
| ATOM | 1400 | CG   | ASN | 90 | 22.409 | 42.536 | 33.612 |
| ATOM | 1401 | OD1  | ASN | 90 | 21.564 | 42.136 | 34.397 |
| ATOM | 1402 | ND2  | ASN | 90 | 23.393 | 41.755 | 33.241 |
| ATOM | 1403 | 1HD2 | ASN | 90 | 23.380 | 40.813 | 33.588 |
| ATOM | 1404 | 2HD2 | ASN | 90 | 24.137 | 42.135 | 32.700 |
| ATOM | 1405 | C    | ASN | 90 | 20.010 | 43.563 | 32.284 |
| ATOM | 1406 | O    | ASN | 90 | 19.668 | 42.419 | 31.993 |
| ATOM | 1407 | N    | ARG | 91 | 19.174 | 44.383 | 32.926 |
| ATOM | 1408 | H    | ARG | 91 | 19.489 | 45.328 | 33.100 |
| ATOM | 1409 | CA   | ARG | 91 | 17.797 | 44.008 | 33.247 |
| ATOM | 1410 | HA   | ARG | 91 | 17.791 | 42.955 | 33.536 |
| ATOM | 1411 | CB   | ARG | 91 | 17.284 | 44.854 | 34.411 |
| ATOM | 1412 | ZHB  | ARG | 91 | 17.605 | 45.892 | 34.283 |
| ATOM | 1413 | 3HB  | ARG | 91 | 16.193 | 44.819 | 34.463 |
| ATOM | 1414 | CG   | ARG | 91 | 17.861 | 44.259 | 35.683 |
| ATOM | 1415 | ZHG  | ARG | 91 | 17.434 | 43.269 | 35.852 |
| ATOM | 1416 | 3HG  | ARG | 91 | 18.944 | 44.160 | 35.568 |
| ATOM | 1417 | CD   | ARG | 91 | 17.559 | 45.124 | 36.901 |
| ATOM | 1418 | ZHD  | ARG | 91 | 17.578 | 46.186 | 36.631 |
| ATOM | 1419 | 3HD  | ARG | 91 | 16.572 | 44.859 | 37.284 |
| ATOM | 1420 | NE   | ARG | 91 | 18.606 | 44.852 | 37.881 |
| ATOM | 1421 | HE   | ARG | 91 | 19.476 | 44.523 | 37.494 |
| ATOM | 1422 | CZ   | ARG | 91 | 18.553 | 45.048 | 39.171 |
| ATOM | 1423 | NH1  | ARG | 91 | 17.513 | 45.523 | 39.782 |
| ATOM | 1424 | 1HH1 | ARG | 91 | 16.719 | 45.839 | 39.233 |
| ATOM | 1425 | 2HH1 | ARG | 91 | 17.559 | 45.722 | 40.767 |
| ATOM | 1426 | NH2  | ARG | 91 | 19.587 | 44.760 | 39.910 |
| ATOM | 1427 | 1HH2 | ARG | 91 | 20.426 | 44.461 | 39.467 |
| ATOM | 1428 | 2HH2 | ARG | 91 | 19.560 | 44.984 | 40.875 |
| ATOM | 1429 | C    | ARG | 91 | 16.863 | 44.158 | 32.069 |
| ATOM | 1430 | O    | ARG | 91 | 16.780 | 45.231 | 31.482 |
| ATOM | 1431 | N    | ARG | 92 | 16.028 | 43.133 | 31.873 |
| ATOM | 1432 | H    | ARG | 92 | 16.322 | 42.234 | 32.236 |
| ATOM | 1433 | CA   | ARG | 92 | 14.756 | 43.175 | 31.126 |
| ATOM | 1434 | HA   | ARG | 92 | 14.245 | 42.224 | 31.276 |
| ATOM | 1435 | CB   | ARG | 92 | 13.887 | 44.313 | 31.692 |
| ATOM | 1436 | ZHB  | ARG | 92 | 14.260 | 44.635 | 32.666 |
| ATOM | 1437 | 3HB  | ARG | 92 | 13.958 | 45.169 | 31.016 |
| ATOM | 1438 | CG   | ARG | 92 | 12.424 | 43.916 | 31.887 |
| ATOM | 1439 | ZHG  | ARG | 92 | 12.091 | 43.264 | 31.076 |
| ATOM | 1440 | 3HG  | ARG | 92 | 12.337 | 43.372 | 32.829 |
| ATOM | 1441 | CD   | ARG | 92 | 11.547 | 45.174 | 31.948 |
| ATOM | 1442 | ZHD  | ARG | 92 | 10.807 | 45.046 | 32.737 |
| ATOM | 1443 | 3HD  | ARG | 92 | 12.165 | 46.045 | 32.189 |
| ATOM | 1444 | NE   | ARG | 92 | 10.849 | 45.377 | 30.670 |
| ATOM | 1445 | HE   | ARG | 92 | 11.059 | 44.702 | 29.943 |
| ATOM | 1446 | CZ   | ARG | 92 | 9.989  | 46.340 | 30.378 |
| ATOM | 1447 | NH1  | ARG | 92 | 9.680  | 47.292 | 31.207 |
| ATOM | 1448 | 1HH1 | ARG | 92 | 10.166 | 47.385 | 32.071 |
| ATOM | 1449 | 2HH1 | ARG | 92 | 9.084  | 48.026 | 30.855 |

|      |      |      |     |    |        |        |        |
|------|------|------|-----|----|--------|--------|--------|
| ATOM | 1450 | NH2  | ARG | 92 | 9.391  | 46.376 | 29.229 |
| ATOM | 1451 | 1HH2 | ARG | 92 | 9.631  | 45.681 | 28.551 |
| ATOM | 1452 | 2HH2 | ARG | 92 | 9.117  | 47.304 | 28.883 |
| ATOM | 1453 | C    | ARG | 92 | 14.886 | 43.309 | 29.611 |
| ATOM | 1454 | O    | ARG | 92 | 13.987 | 42.887 | 28.902 |
| ATOM | 1455 | N    | TYR | 93 | 15.981 | 43.886 | 29.140 |
| ATOM | 1456 | H    | TYR | 93 | 16.555 | 44.392 | 29.801 |
| ATOM | 1457 | CA   | TYR | 93 | 16.354 | 43.956 | 27.739 |
| ATOM | 1458 | HA   | TYR | 93 | 15.465 | 43.844 | 27.115 |
| ATOM | 1459 | CB   | TYR | 93 | 16.959 | 45.343 | 27.490 |
| ATOM | 1460 | 2HB  | TYR | 93 | 17.914 | 45.410 | 28.013 |
| ATOM | 1461 | 3HB  | TYR | 93 | 17.151 | 45.456 | 26.423 |
| ATOM | 1462 | CG   | TYR | 93 | 16.064 | 46.483 | 27.956 |
| ATOM | 1463 | CD1  | TYR | 93 | 14.819 | 46.687 | 27.338 |
| ATOM | 1464 | HD1  | TYR | 93 | 14.511 | 46.035 | 26.543 |
| ATOM | 1465 | CE1  | TYR | 93 | 13.966 | 47.720 | 27.766 |
| ATOM | 1466 | HE1  | TYR | 93 | 13.016 | 47.889 | 27.283 |
| ATOM | 1467 | CZ   | TYR | 93 | 14.362 | 48.560 | 28.823 |
| ATOM | 1468 | OH   | TYR | 93 | 13.534 | 49.555 | 29.229 |
| ATOM | 1469 | HH   | TYR | 93 | 13.953 | 50.150 | 29.848 |
| ATOM | 1470 | CE2  | TYR | 93 | 15.604 | 48.350 | 29.464 |
| ATOM | 1471 | HE2  | TYR | 93 | 15.911 | 48.983 | 30.282 |
| ATOM | 1472 | CD2  | TYR | 93 | 16.442 | 47.300 | 29.040 |
| ATOM | 1473 | HD2  | TYR | 93 | 17.369 | 47.110 | 29.562 |
| ATOM | 1474 | C    | TYR | 93 | 17.301 | 42.805 | 27.395 |
| ATOM | 1475 | O    | TYR | 93 | 17.038 | 42.048 | 26.468 |
| ATOM | 1476 | N    | ASP | 94 | 18.348 | 42.595 | 28.201 |
| ATOM | 1477 | H    | ASP | 94 | 18.557 | 43.258 | 28.935 |
| ATOM | 1478 | CA   | ASP | 94 | 19.292 | 41.495 | 27.982 |
| ATOM | 1479 | HA   | ASP | 94 | 19.499 | 41.444 | 26.920 |
| ATOM | 1480 | CB   | ASP | 94 | 20.607 | 41.827 | 28.677 |
| ATOM | 1481 | 2HB  | ASP | 94 | 20.980 | 42.784 | 28.312 |
| ATOM | 1482 | 3HB  | ASP | 94 | 20.426 | 41.917 | 29.743 |
| ATOM | 1483 | CG   | ASP | 94 | 21.664 | 40.755 | 28.445 |
| ATOM | 1484 | OD1  | ASP | 94 | 22.195 | 40.626 | 27.320 |
| ATOM | 1485 | OD2  | ASP | 94 | 22.030 | 40.078 | 29.424 |
| ATOM | 1486 | C    | ASP | 94 | 18.741 | 40.114 | 28.382 |
| ATOM | 1487 | O    | ASP | 94 | 18.973 | 39.136 | 27.671 |
| ATOM | 1488 | N    | SER | 95 | 17.922 | 40.028 | 29.440 |
| ATOM | 1489 | H    | SER | 95 | 17.755 | 40.837 | 30.017 |
| ATOM | 1490 | CA   | SER | 95 | 17.196 | 38.787 | 29.754 |
| ATOM | 1491 | HA   | SER | 95 | 17.930 | 37.985 | 29.822 |
| ATOM | 1492 | CB   | SER | 95 | 16.481 | 38.845 | 31.115 |
| ATOM | 1493 | 2HB  | SER | 95 | 15.596 | 38.206 | 31.075 |
| ATOM | 1494 | 3HB  | SER | 95 | 17.151 | 38.432 | 31.869 |
| ATOM | 1495 | OG   | SER | 95 | 16.082 | 40.143 | 31.536 |
| ATOM | 1496 | HG   | SER | 95 | 15.271 | 40.004 | 32.040 |
| ATOM | 1497 | C    | SER | 95 | 16.226 | 38.349 | 28.650 |
| ATOM | 1498 | O    | SER | 95 | 16.035 | 37.150 | 28.482 |
| ATOM | 1499 | N    | GLU | 96 | 15.683 | 39.270 | 27.850 |
| ATOM | 1500 | H    | GLU | 96 | 15.912 | 40.243 | 27.988 |
| ATOM | 1501 | CA   | GLU | 96 | 14.721 | 38.937 | 26.790 |
| ATOM | 1502 | HA   | GLU | 96 | 14.018 | 38.218 | 27.208 |
| ATOM | 1503 | CB   | GLU | 96 | 13.968 | 40.217 | 26.384 |
| ATOM | 1504 | 2HB  | GLU | 96 | 14.007 | 40.936 | 27.200 |
| ATOM | 1505 | 3HB  | GLU | 96 | 14.474 | 40.668 | 25.530 |
| ATOM | 1506 | CG   | GLU | 96 | 12.492 | 39.984 | 26.032 |
| ATOM | 1507 | ZHG  | GLU | 96 | 12.064 | 40.943 | 25.728 |
| ATOM | 1508 | 3HG  | GLU | 96 | 12.428 | 39.305 | 25.179 |
| ATOM | 1509 | CD   | GLU | 96 | 11.702 | 39.415 | 27.222 |
| ATOM | 1510 | OE1  | GLU | 96 | 11.646 | 38.163 | 27.324 |
| ATOM | 1511 | OE2  | GLU | 96 | 11.204 | 40.230 | 28.034 |
| ATOM | 1512 | C    | GLU | 96 | 15.377 | 38.256 | 25.574 |
| ATOM | 1513 | O    | GLU | 96 | 14.757 | 37.445 | 24.881 |
| ATOM | 1514 | N    | PHE | 97 | 16.673 | 38.504 | 25.347 |
| ATOM | 1515 | H    | PHE | 97 | 17.145 | 39.183 | 25.931 |
| ATOM | 1516 | CA   | PHE | 97 | 17.446 | 37.776 | 24.336 |
| ATOM | 1517 | HA   | PHE | 97 | 16.911 | 37.844 | 23.390 |
| ATOM | 1518 | CB   | PHE | 97 | 18.836 | 38.408 | 24.159 |
| ATOM | 1519 | 2HB  | PHE | 97 | 19.378 | 38.283 | 25.097 |
| ATOM | 1520 | 3HB  | PHE | 97 | 19.373 | 37.847 | 23.393 |
| ATOM | 1521 | CG   | PHE | 97 | 18.876 | 39.876 | 23.763 |
| ATOM | 1522 | CD1  | PHE | 97 | 18.116 | 40.359 | 22.680 |
| ATOM | 1523 | HD1  | PHE | 97 | 17.496 | 39.687 | 22.110 |
| ATOM | 1524 | CE1  | PHE | 97 | 18.158 | 41.722 | 22.337 |
| ATOM | 1525 | HE1  | PHE | 97 | 17.571 | 42.088 | 21.507 |
| ATOM | 1526 | CZ   | PHE | 97 | 18.952 | 42.612 | 23.078 |
| ATOM | 1527 | HZ   | PHE | 97 | 18.960 | 43.663 | 22.830 |
| ATOM | 1528 | CE2  | PHE | 97 | 19.735 | 42.131 | 24.141 |
| ATOM | 1529 | HE2  | PHE | 97 | 20.346 | 42.811 | 24.717 |
| ATOM | 1530 | CD2  | PHE | 97 | 19.712 | 40.763 | 24.466 |
| ATOM | 1531 | HD2  | PHE | 97 | 20.326 | 40.393 | 25.274 |
| ATOM | 1532 | C    | PHE | 97 | 17.578 | 36.277 | 24.668 |
| ATOM | 1533 | O    | PHE | 97 | 17.749 | 35.467 | 23.753 |
| ATOM | 1534 | N    | GLN | 98 | 17.461 | 35.876 | 25.941 |
| ATOM | 1535 | H    | GLN | 98 | 17.266 | 36.568 | 26.657 |
| ATOM | 1536 | CA   | GLN | 98 | 17.433 | 34.457 | 26.315 |
| ATOM | 1537 | HA   | GLN | 98 | 18.225 | 33.953 | 25.769 |
| ATOM | 1538 | CB   | GLN | 98 | 17.746 | 34.258 | 27.804 |
| ATOM | 1539 | 2HB  | GLN | 98 | 17.040 | 34.814 | 28.421 |
| ATOM | 1540 | 3HB  | GLN | 98 | 17.611 | 33.196 | 28.020 |
| ATOM | 1541 | CG   | GLN | 98 | 19.188 | 34.664 | 28.157 |
| ATOM | 1542 | ZHG  | GLN | 98 | 19.853 | 34.431 | 27.327 |
| ATOM | 1543 | 3HG  | GLN | 98 | 19.223 | 35.738 | 28.339 |
| ATOM | 1544 | CD   | GLN | 98 | 19.710 | 33.900 | 29.362 |
| ATOM | 1545 | OE1  | GLN | 98 | 19.758 | 32.683 | 29.390 |
| ATOM | 1546 | NE2  | GLN | 98 | 20.183 | 34.571 | 30.393 |
| ATOM | 1547 | 1HE2 | GLN | 98 | 20.549 | 34.024 | 31.143 |
| ATOM | 1548 | 2HE2 | GLN | 98 | 20.233 | 35.577 | 30.363 |
| ATOM | 1549 | C    | GLN | 98 | 16.108 | 33.781 | 25.913 |
| ATOM | 1550 | O    | GLN | 98 | 16.120 | 32.647 | 25.425 |
| ATOM | 1551 | N    | THR | 99 | 14.981 | 34.493 | 26.008 |
| ATOM | 1552 | H    | THR | 99 | 14.999 | 35.398 | 26.469 |
| ATOM | 1553 | CA   | THR | 99 | 13.656 | 34.036 | 25.540 |
| ATOM | 1554 | HA   | THR | 99 | 13.449 | 33.074 | 26.006 |

|      |      |      |     |     |        |        |        |
|------|------|------|-----|-----|--------|--------|--------|
| ATOM | 1555 | CB   | THR | 99  | 12.555 | 35.044 | 25.947 |
| ATOM | 1556 | HB   | THR | 99  | 12.448 | 35.779 | 25.150 |
| ATOM | 1557 | CG2  | THR | 99  | 11.216 | 34.341 | 26.179 |
| ATOM | 1558 | 1HG2 | THR | 99  | 10.413 | 35.023 | 25.907 |
| ATOM | 1559 | 2HG2 | THR | 99  | 11.139 | 33.441 | 25.569 |
| ATOM | 1560 | 3HG2 | THR | 99  | 11.112 | 34.066 | 27.229 |
| ATOM | 1561 | OG1  | THR | 99  | 12.886 | 35.727 | 27.141 |
| ATOM | 1562 | 1HG  | THR | 99  | 12.339 | 36.548 | 27.193 |
| ATOM | 1563 | C    | THR | 99  | 13.608 | 33.828 | 24.014 |
| ATOM | 1564 | O    | THR | 99  | 12.875 | 32.980 | 23.502 |
| ATOM | 1565 | N    | MET | 100 | 14.444 | 34.556 | 23.265 |
| ATOM | 1566 | H    | MET | 100 | 14.952 | 35.298 | 23.734 |
| ATOM | 1567 | CA   | MET | 100 | 14.681 | 34.333 | 21.828 |
| ATOM | 1568 | HA   | MET | 100 | 13.730 | 34.138 | 21.331 |
| ATOM | 1569 | CB   | MET | 100 | 15.305 | 35.598 | 21.206 |
| ATOM | 1570 | 2HB  | MET | 100 | 16.273 | 35.789 | 21.664 |
| ATOM | 1571 | 3HB  | MET | 100 | 15.454 | 35.439 | 20.138 |
| ATOM | 1572 | CG   | MET | 100 | 14.419 | 36.833 | 21.398 |
| ATOM | 1573 | 2HG  | MET | 100 | 13.597 | 36.776 | 20.692 |
| ATOM | 1574 | 3HG  | MET | 100 | 14.010 | 36.832 | 22.408 |
| ATOM | 1575 | SD   | MET | 100 | 15.227 | 38.428 | 21.158 |
| ATOM | 1576 | CE   | MET | 100 | 13.924 | 39.466 | 21.873 |
| ATOM | 1577 | 1HE  | MET | 100 | 14.294 | 40.483 | 21.998 |
| ATOM | 1578 | 2HE  | MET | 100 | 13.057 | 39.468 | 21.213 |
| ATOM | 1579 | 3HE  | MET | 100 | 13.629 | 39.073 | 22.848 |
| ATOM | 1580 | C    | MET | 100 | 15.576 | 33.107 | 21.593 |
| ATOM | 1581 | O    | MET | 100 | 15.272 | 32.246 | 20.768 |
| ATOM | 1582 | N    | LEU | 101 | 16.665 | 32.993 | 22.358 |
| ATOM | 1583 | H    | LEU | 101 | 16.845 | 33.733 | 23.030 |
| ATOM | 1584 | CA   | LEU | 101 | 17.688 | 31.954 | 22.220 |
| ATOM | 1585 | HA   | LEU | 101 | 18.088 | 31.999 | 21.209 |
| ATOM | 1586 | CB   | LEU | 101 | 18.792 | 32.249 | 23.237 |
| ATOM | 1587 | 2HB  | LEU | 101 | 18.359 | 32.783 | 24.072 |
| ATOM | 1588 | 3HB  | LEU | 101 | 19.188 | 31.313 | 23.643 |
| ATOM | 1589 | CG   | LEU | 101 | 19.950 | 33.091 | 22.643 |
| ATOM | 1590 | HG   | LEU | 101 | 19.539 | 33.999 | 22.175 |
| ATOM | 1591 | CD1  | LEU | 101 | 20.923 | 33.473 | 23.761 |
| ATOM | 1592 | 1HD1 | LEU | 101 | 21.902 | 33.752 | 23.365 |
| ATOM | 1593 | 2HD1 | LEU | 101 | 20.521 | 34.325 | 24.298 |
| ATOM | 1594 | 3HD1 | LEU | 101 | 21.058 | 32.624 | 24.422 |
| ATOM | 1595 | CD2  | LEU | 101 | 20.824 | 32.329 | 21.618 |
| ATOM | 1596 | 1HD2 | LEU | 101 | 20.531 | 32.589 | 20.603 |
| ATOM | 1597 | 2HD2 | LEU | 101 | 20.728 | 31.262 | 21.798 |
| ATOM | 1598 | 3HD2 | LEU | 101 | 21.872 | 32.599 | 21.692 |
| ATOM | 1599 | C    | LEU | 101 | 17.190 | 30.518 | 22.412 |
| ATOM | 1600 | O    | LEU | 101 | 17.777 | 29.613 | 21.822 |
| ATOM | 1601 | N    | GLN | 102 | 16.121 | 30.274 | 23.177 |
| ATOM | 1602 | H    | GLN | 102 | 15.710 | 31.031 | 23.712 |
| ATOM | 1603 | CA   | GLN | 102 | 15.625 | 28.903 | 23.364 |
| ATOM | 1604 | HA   | GLN | 102 | 16.508 | 28.261 | 23.385 |
| ATOM | 1605 | CB   | GLN | 102 | 14.978 | 28.721 | 24.744 |
| ATOM | 1606 | 2HB  | GLN | 102 | 15.228 | 27.705 | 25.041 |
| ATOM | 1607 | 3HB  | GLN | 102 | 15.476 | 29.377 | 25.456 |
| ATOM | 1608 | CG   | GLN | 102 | 13.441 | 28.832 | 24.856 |
| ATOM | 1609 | 2HG  | GLN | 102 | 12.977 | 28.893 | 23.873 |
| ATOM | 1610 | 3HG  | GLN | 102 | 13.096 | 27.909 | 25.314 |
| ATOM | 1611 | CD   | GLN | 102 | 12.895 | 29.966 | 25.703 |
| ATOM | 1612 | OE1  | GLN | 102 | 11.978 | 30.668 | 25.320 |
| ATOM | 1613 | NE2  | GLN | 102 | 13.353 | 30.124 | 26.934 |
| ATOM | 1614 | 1HE2 | GLN | 102 | 12.964 | 30.872 | 27.464 |
| ATOM | 1615 | 2HE2 | GLN | 102 | 14.029 | 29.475 | 27.303 |
| ATOM | 1616 | C    | GLN | 102 | 14.801 | 28.341 | 22.197 |
| ATOM | 1617 | O    | GLN | 102 | 14.411 | 27.177 | 22.230 |
| ATOM | 1618 | N    | HIP | 103 | 14.553 | 29.142 | 21.154 |
| ATOM | 1619 | H    | HIP | 103 | 14.866 | 30.106 | 21.204 |
| ATOM | 1620 | CA   | HIP | 103 | 13.987 | 28.654 | 19.887 |
| ATOM | 1621 | HA   | HIP | 103 | 13.448 | 27.726 | 20.080 |
| ATOM | 1622 | CB   | HIP | 103 | 12.990 | 29.672 | 19.322 |
| ATOM | 1623 | 2HB  | HIP | 103 | 13.515 | 30.602 | 19.095 |
| ATOM | 1624 | 3HB  | HIP | 103 | 12.569 | 29.282 | 18.392 |
| ATOM | 1625 | CG   | HIP | 103 | 11.874 | 29.948 | 20.289 |
| ATOM | 1626 | ND1  | HIP | 103 | 10.946 | 29.026 | 20.737 |
| ATOM | 1627 | HD1  | HIP | 103 | 10.845 | 28.080 | 20.379 |
| ATOM | 1628 | CE1  | HIP | 103 | 10.264 | 29.595 | 21.753 |
| ATOM | 1629 | HE1  | HIP | 103 | 9.502  | 29.106 | 22.353 |
| ATOM | 1630 | NE2  | HIP | 103 | 10.727 | 30.853 | 21.941 |
| ATOM | 1631 | HE2  | HIP | 103 | 10.481 | 31.486 | 22.703 |
| ATOM | 1632 | CD2  | HIP | 103 | 11.730 | 31.090 | 21.022 |
| ATOM | 1633 | HD2  | HIP | 103 | 12.354 | 31.976 | 20.950 |
| ATOM | 1634 | C    | HIP | 103 | 15.043 | 28.278 | 18.848 |
| ATOM | 1635 | O    | HIP | 103 | 14.686 | 27.785 | 17.783 |
| ATOM | 1636 | N    | LEU | 104 | 16.330 | 28.486 | 19.138 |
| ATOM | 1637 | H    | LEU | 104 | 16.584 | 28.857 | 20.040 |
| ATOM | 1638 | CA   | LEU | 104 | 17.404 | 28.103 | 18.230 |
| ATOM | 1639 | HA   | LEU | 104 | 17.063 | 28.262 | 17.206 |
| ATOM | 1640 | CB   | LEU | 104 | 18.637 | 28.955 | 18.512 |
| ATOM | 1641 | 2HB  | LEU | 104 | 18.668 | 29.179 | 19.571 |
| ATOM | 1642 | 3HB  | LEU | 104 | 19.536 | 28.379 | 18.282 |
| ATOM | 1643 | CG   | LEU | 104 | 18.625 | 30.251 | 17.699 |
| ATOM | 1644 | HG   | LEU | 104 | 17.662 | 30.747 | 17.824 |
| ATOM | 1645 | CD1  | LEU | 104 | 18.872 | 30.007 | 16.216 |
| ATOM | 1646 | 1HD1 | LEU | 104 | 18.001 | 29.550 | 15.749 |
| ATOM | 1647 | 2HD1 | LEU | 104 | 19.739 | 29.354 | 16.076 |
| ATOM | 1648 | 3HD1 | LEU | 104 | 19.045 | 30.965 | 15.726 |
| ATOM | 1649 | CD2  | LEU | 104 | 19.723 | 31.187 | 18.187 |
| ATOM | 1650 | 1HD2 | LEU | 104 | 19.865 | 31.982 | 17.459 |
| ATOM | 1651 | 2HD2 | LEU | 104 | 19.385 | 31.627 | 19.113 |
| ATOM | 1652 | 3HD2 | LEU | 104 | 20.657 | 30.649 | 18.325 |
| ATOM | 1653 | C    | LEU | 104 | 17.804 | 26.643 | 18.351 |
| ATOM | 1654 | O    | LEU | 104 | 17.951 | 26.114 | 19.454 |
| ATOM | 1655 | N    | GLN | 105 | 18.113 | 26.050 | 17.202 |
| ATOM | 1656 | H    | GLN | 105 | 18.021 | 26.571 | 16.334 |
| ATOM | 1657 | CA   | GLN | 105 | 18.673 | 24.709 | 17.139 |
| ATOM | 1658 | HA   | GLN | 105 | 18.176 | 24.113 | 17.903 |
| ATOM | 1659 | CB   | GLN | 105 | 18.323 | 24.086 | 15.780 |



|      |      |      |     |     |        |        |        |
|------|------|------|-----|-----|--------|--------|--------|
| ATOM | 1660 | ZHB  | GLN | 105 | 18.784 | 24.665 | 14.985 |
| ATOM | 1661 | 3HB  | GLN | 105 | 18.749 | 23.088 | 15.734 |
| ATOM | 1662 | CG   | GLN | 105 | 16.790 | 24.040 | 15.563 |
| ATOM | 1663 | ZHG  | GLN | 105 | 16.262 | 24.336 | 16.471 |
| ATOM | 1664 | 3HG  | GLN | 105 | 16.518 | 24.762 | 14.797 |
| ATOM | 1665 | CD   | GLN | 105 | 16.232 | 22.685 | 15.151 |
| ATOM | 1666 | OE1  | GLN | 105 | 16.876 | 21.650 | 15.202 |
| ATOM | 1667 | NE2  | GLN | 105 | 14.976 | 22.649 | 14.770 |
| ATOM | 1668 | 1HE2 | GLN | 105 | 14.614 | 21.759 | 14.483 |
| ATOM | 1669 | 2HE2 | GLN | 105 | 14.441 | 23.499 | 14.704 |
| ATOM | 1670 | C    | GLN | 105 | 20.185 | 24.718 | 17.459 |
| ATOM | 1671 | O    | GLN | 105 | 20.817 | 25.779 | 17.482 |
| ATOM | 1672 | N    | PRO | 106 | 20.807 | 23.556 | 17.752 |
| ATOM | 1673 | CD   | PRO | 106 | 20.157 | 22.277 | 17.994 |
| ATOM | 1674 | ZHD  | PRO | 106 | 19.964 | 21.768 | 17.049 |
| ATOM | 1675 | 3HD  | PRO | 106 | 19.225 | 22.406 | 18.545 |
| ATOM | 1676 | CG   | PRO | 106 | 21.118 | 21.448 | 18.841 |
| ATOM | 1677 | ZHG  | PRO | 106 | 21.181 | 20.429 | 18.454 |
| ATOM | 1678 | 3HG  | PRO | 106 | 20.779 | 21.435 | 19.877 |
| ATOM | 1679 | CB   | PRO | 106 | 22.476 | 22.146 | 18.756 |
| ATOM | 1680 | ZHB  | PRO | 106 | 22.878 | 22.310 | 19.755 |
| ATOM | 1681 | 3HB  | PRO | 106 | 23.169 | 21.533 | 18.176 |
| ATOM | 1682 | CA   | PRO | 106 | 22.235 | 23.496 | 18.072 |
| ATOM | 1683 | HA   | PRO | 106 | 22.460 | 24.293 | 18.781 |
| ATOM | 1684 | C    | PRO | 106 | 23.183 | 23.686 | 16.877 |
| ATOM | 1685 | O    | PRO | 106 | 24.395 | 23.746 | 17.096 |
| ATOM | 1686 | N    | THR | 107 | 22.667 | 23.744 | 15.646 |
| ATOM | 1687 | H    | THR | 107 | 21.664 | 23.727 | 15.530 |
| ATOM | 1688 | CA   | THR | 107 | 23.455 | 23.920 | 14.421 |
| ATOM | 1689 | HA   | THR | 107 | 24.450 | 23.515 | 14.599 |
| ATOM | 1690 | CB   | THR | 107 | 22.862 | 23.137 | 13.237 |
| ATOM | 1691 | HB   | THR | 107 | 23.454 | 23.354 | 12.349 |
| ATOM | 1692 | CG2  | THR | 107 | 22.866 | 21.628 | 13.479 |
| ATOM | 1693 | 1HG2 | THR | 107 | 23.769 | 21.330 | 14.013 |
| ATOM | 1694 | 2HG2 | THR | 107 | 21.991 | 21.329 | 14.058 |
| ATOM | 1695 | 3HG2 | THR | 107 | 22.848 | 21.119 | 12.514 |
| ATOM | 1696 | OG1  | THR | 107 | 21.526 | 23.508 | 13.008 |
| ATOM | 1697 | 1HG  | THR | 107 | 21.232 | 23.038 | 12.218 |
| ATOM | 1698 | C    | THR | 107 | 23.637 | 25.393 | 14.049 |
| ATOM | 1699 | O    | THR | 107 | 22.735 | 26.218 | 14.181 |
| ATOM | 1700 | N    | ALA | 108 | 24.830 | 25.724 | 13.551 |
| ATOM | 1701 | H    | ALA | 108 | 25.531 | 25.008 | 13.456 |
| ATOM | 1702 | CA   | ALA | 108 | 25.191 | 27.088 | 13.157 |
| ATOM | 1703 | HA   | ALA | 108 | 24.982 | 27.765 | 13.985 |
| ATOM | 1704 | CB   | ALA | 108 | 26.692 | 27.091 | 12.876 |
| ATOM | 1705 | 1HB  | ALA | 108 | 27.248 | 26.655 | 13.706 |
| ATOM | 1706 | ZHB  | ALA | 108 | 26.909 | 26.537 | 11.959 |
| ATOM | 1707 | 3HB  | ALA | 108 | 26.998 | 28.125 | 12.746 |
| ATOM | 1708 | C    | ALA | 108 | 24.411 | 27.590 | 11.926 |
| ATOM | 1709 | O    | ALA | 108 | 24.106 | 28.769 | 11.794 |
| ATOM | 1710 | N    | GLU | 109 | 24.062 | 26.649 | 11.058 |
| ATOM | 1711 | H    | GLU | 109 | 24.389 | 25.717 | 11.246 |
| ATOM | 1712 | CA   | GLU | 109 | 23.293 | 26.800 | 9.827  |
| ATOM | 1713 | HA   | GLU | 109 | 23.794 | 27.496 | 9.154  |
| ATOM | 1714 | CB   | GLU | 109 | 23.316 | 25.378 | 9.246  |
| ATOM | 1715 | ZHB  | GLU | 109 | 22.581 | 24.767 | 9.775  |
| ATOM | 1716 | 3HB  | GLU | 109 | 24.302 | 24.960 | 9.466  |
| ATOM | 1717 | CG   | GLU | 109 | 23.139 | 25.209 | 7.739  |
| ATOM | 1718 | ZHG  | GLU | 109 | 22.125 | 25.491 | 7.452  |
| ATOM | 1719 | 3HG  | GLU | 109 | 23.847 | 25.878 | 7.242  |
| ATOM | 1720 | CD   | GLU | 109 | 23.440 | 23.752 | 7.326  |
| ATOM | 1721 | OE1  | GLU | 109 | 23.604 | 23.524 | 6.108  |
| ATOM | 1722 | OE2  | GLU | 109 | 23.549 | 22.884 | 8.227  |
| ATOM | 1723 | C    | GLU | 109 | 21.869 | 27.318 | 10.104 |
| ATOM | 1724 | O    | GLU | 109 | 21.425 | 28.300 | 9.513  |
| ATOM | 1725 | N    | ASN | 110 | 21.198 | 26.730 | 11.101 |
| ATOM | 1726 | H    | ASN | 110 | 21.639 | 25.962 | 11.584 |
| ATOM | 1727 | CA   | ASN | 110 | 19.884 | 27.166 | 11.567 |
| ATOM | 1728 | HA   | ASN | 110 | 19.219 | 27.270 | 10.706 |
| ATOM | 1729 | CB   | ASN | 110 | 19.353 | 26.080 | 12.507 |
| ATOM | 1730 | ZHB  | ASN | 110 | 19.365 | 25.116 | 11.999 |
| ATOM | 1731 | 3HB  | ASN | 110 | 19.998 | 26.016 | 13.385 |
| ATOM | 1732 | CG   | ASN | 110 | 17.942 | 26.376 | 12.971 |
| ATOM | 1733 | OD1  | ASN | 110 | 17.713 | 26.903 | 14.049 |
| ATOM | 1734 | ND2  | ASN | 110 | 16.955 | 26.019 | 12.183 |
| ATOM | 1735 | 1HD2 | ASN | 110 | 16.029 | 26.267 | 12.474 |
| ATOM | 1736 | 2HD2 | ASN | 110 | 17.139 | 25.633 | 11.271 |
| ATOM | 1737 | C    | ASN | 110 | 19.939 | 28.525 | 12.284 |
| ATOM | 1738 | O    | ASN | 110 | 18.999 | 29.315 | 12.183 |
| ATOM | 1739 | N    | ALA | 111 | 21.048 | 28.818 | 12.970 |
| ATOM | 1740 | H    | ALA | 111 | 21.785 | 28.126 | 13.010 |
| ATOM | 1741 | CA   | ALA | 111 | 21.257 | 30.100 | 13.633 |
| ATOM | 1742 | HA   | ALA | 111 | 20.419 | 30.267 | 14.289 |
| ATOM | 1743 | CB   | ALA | 111 | 22.523 | 30.031 | 14.496 |
| ATOM | 1744 | 1HB  | ALA | 111 | 22.274 | 29.626 | 15.477 |
| ATOM | 1745 | ZHB  | ALA | 111 | 23.273 | 29.396 | 14.035 |
| ATOM | 1746 | 3HB  | ALA | 111 | 22.947 | 31.025 | 14.607 |
| ATOM | 1747 | C    | ALA | 111 | 21.226 | 31.289 | 12.664 |
| ATOM | 1748 | O    | ALA | 111 | 20.626 | 32.316 | 12.994 |
| ATOM | 1749 | N    | TYR | 112 | 21.768 | 31.128 | 11.455 |
| ATOM | 1750 | H    | TYR | 112 | 22.286 | 30.277 | 11.267 |
| ATOM | 1751 | CA   | TYR | 112 | 21.617 | 32.105 | 10.377 |
| ATOM | 1752 | HA   | TYR | 112 | 21.902 | 33.088 | 10.749 |
| ATOM | 1753 | CB   | TYR | 112 | 22.547 | 31.726 | 9.217  |
| ATOM | 1754 | ZHB  | TYR | 112 | 22.231 | 30.757 | 8.830  |
| ATOM | 1755 | 3HB  | TYR | 112 | 22.403 | 32.450 | 8.416  |
| ATOM | 1756 | CG   | TYR | 112 | 24.039 | 31.665 | 9.509  |
| ATOM | 1757 | CD1  | TYR | 112 | 24.649 | 32.526 | 10.446 |
| ATOM | 1758 | HD1  | TYR | 112 | 24.053 | 33.220 | 11.019 |
| ATOM | 1759 | CE1  | TYR | 112 | 26.047 | 32.520 | 10.608 |
| ATOM | 1760 | HE1  | TYR | 112 | 26.517 | 33.195 | 11.303 |
| ATOM | 1761 | CZ   | TYR | 112 | 26.843 | 31.655 | 9.830  |
| ATOM | 1762 | OH   | TYR | 112 | 28.197 | 31.699 | 9.943  |
| ATOM | 1763 | HH   | TYR | 112 | 28.614 | 31.051 | 9.369  |
| ATOM | 1764 | CE2  | TYR | 112 | 26.234 | 30.766 | 8.918  |

|      |      |      |     |     |        |        |        |
|------|------|------|-----|-----|--------|--------|--------|
| ATOM | 1765 | HE2  | TYR | 112 | 26.833 | 30.095 | 8.323  |
| ATOM | 1766 | CD2  | TYR | 112 | 24.835 | 30.777 | 8.760  |
| ATOM | 1767 | HD2  | TYR | 112 | 24.365 | 30.119 | 8.041  |
| ATOM | 1768 | C    | TYR | 112 | 20.165 | 32.229 | 9.882  |
| ATOM | 1769 | O    | TYR | 112 | 19.664 | 33.348 | 9.746  |
| ATOM | 1770 | N    | GLU | 113 | 19.458 | 31.118 | 9.641  |
| ATOM | 1771 | H    | GLU | 113 | 19.910 | 30.216 | 9.755  |
| ATOM | 1772 | CA   | GLU | 113 | 18.071 | 31.159 | 9.146  |
| ATOM | 1773 | HA   | GLU | 113 | 18.055 | 31.749 | 8.230  |
| ATOM | 1774 | CB   | GLU | 113 | 17.582 | 29.739 | 8.813  |
| ATOM | 1775 | ZHB  | GLU | 113 | 18.363 | 29.194 | 8.285  |
| ATOM | 1776 | ZHB  | GLU | 113 | 17.353 | 29.212 | 9.740  |
| ATOM | 1777 | CG   | GLU | 113 | 16.338 | 29.786 | 7.912  |
| ATOM | 1778 | ZHG  | GLU | 113 | 15.678 | 30.587 | 8.246  |
| ATOM | 1779 | ZHG  | GLU | 113 | 16.639 | 30.016 | 6.889  |
| ATOM | 1780 | CD   | GLU | 113 | 15.537 | 28.481 | 7.938  |
| ATOM | 1781 | OE1  | GLU | 113 | 16.136 | 27.392 | 7.986  |
| ATOM | 1782 | OE2  | GLU | 113 | 14.286 | 28.583 | 7.970  |
| ATOM | 1783 | C    | GLU | 113 | 17.121 | 31.843 | 10.148 |
| ATOM | 1784 | O    | GLU | 113 | 16.317 | 32.701 | 9.772  |
| ATOM | 1785 | N    | TYR | 114 | 17.243 | 31.517 | 11.438 |
| ATOM | 1786 | H    | TYR | 114 | 17.911 | 30.791 | 11.690 |
| ATOM | 1787 | CA   | TYR | 114 | 16.414 | 32.102 | 12.492 |
| ATOM | 1788 | HA   | TYR | 114 | 15.369 | 32.013 | 12.198 |
| ATOM | 1789 | CB   | TYR | 114 | 16.621 | 31.308 | 13.783 |
| ATOM | 1790 | ZHB  | TYR | 114 | 16.490 | 30.244 | 13.576 |
| ATOM | 1791 | ZHB  | TYR | 114 | 17.645 | 31.460 | 14.114 |
| ATOM | 1792 | CG   | TYR | 114 | 15.660 | 31.700 | 14.886 |
| ATOM | 1793 | CD1  | TYR | 114 | 14.320 | 31.277 | 14.810 |
| ATOM | 1794 | HD1  | TYR | 114 | 14.000 | 30.638 | 13.999 |
| ATOM | 1795 | CE1  | TYR | 114 | 13.392 | 31.699 | 15.776 |
| ATOM | 1796 | HE1  | TYR | 114 | 12.362 | 31.385 | 15.703 |
| ATOM | 1797 | CZ   | TYR | 114 | 13.809 | 32.527 | 16.839 |
| ATOM | 1798 | OH   | TYR | 114 | 12.900 | 32.965 | 17.744 |
| ATOM | 1799 | HH   | TYR | 114 | 12.010 | 32.890 | 17.353 |
| ATOM | 1800 | CE2  | TYR | 114 | 15.162 | 32.913 | 16.945 |
| ATOM | 1801 | HE2  | TYR | 114 | 15.467 | 33.546 | 17.764 |
| ATOM | 1802 | CD2  | TYR | 114 | 16.084 | 32.511 | 15.958 |
| ATOM | 1803 | HD2  | TYR | 114 | 17.113 | 32.837 | 16.012 |
| ATOM | 1804 | C    | TYR | 114 | 16.708 | 33.596 | 12.697 |
| ATOM | 1805 | O    | TYR | 114 | 15.777 | 34.399 | 12.774 |
| ATOM | 1806 | N    | PHE | 115 | 17.988 | 33.993 | 12.711 |
| ATOM | 1807 | H    | PHE | 115 | 18.719 | 33.291 | 12.637 |
| ATOM | 1808 | CA   | PHE | 115 | 18.391 | 35.402 | 12.793 |
| ATOM | 1809 | HA   | PHE | 115 | 18.002 | 35.828 | 13.718 |
| ATOM | 1810 | CB   | PHE | 115 | 19.925 | 35.481 | 12.818 |
| ATOM | 1811 | ZHB  | PHE | 115 | 20.281 | 34.872 | 13.649 |
| ATOM | 1812 | ZHB  | PHE | 115 | 20.319 | 35.034 | 11.903 |
| ATOM | 1813 | CG   | PHE | 115 | 20.513 | 36.878 | 12.964 |
| ATOM | 1814 | CD1  | PHE | 115 | 20.928 | 37.340 | 14.228 |
| ATOM | 1815 | HD1  | PHE | 115 | 20.798 | 36.715 | 15.097 |
| ATOM | 1816 | CE1  | PHE | 115 | 21.536 | 38.601 | 14.364 |
| ATOM | 1817 | HE1  | PHE | 115 | 21.858 | 38.945 | 15.338 |
| ATOM | 1818 | CZ   | PHE | 115 | 21.739 | 39.406 | 13.231 |
| ATOM | 1819 | HZ   | PHE | 115 | 22.216 | 40.371 | 13.331 |
| ATOM | 1820 | CE2  | PHE | 115 | 21.314 | 38.959 | 11.968 |
| ATOM | 1821 | HE2  | PHE | 115 | 21.468 | 39.577 | 11.093 |
| ATOM | 1822 | CD2  | PHE | 115 | 20.701 | 37.700 | 11.835 |
| ATOM | 1823 | HD2  | PHE | 115 | 20.398 | 37.357 | 10.855 |
| ATOM | 1824 | C    | PHE | 115 | 17.799 | 36.214 | 11.638 |
| ATOM | 1825 | O    | PHE | 115 | 17.162 | 37.242 | 11.868 |
| ATOM | 1826 | N    | THR | 116 | 17.914 | 35.717 | 10.403 |
| ATOM | 1827 | H    | THR | 116 | 18.430 | 34.852 | 10.280 |
| ATOM | 1828 | CA   | THR | 116 | 17.396 | 36.406 | 9.210  |
| ATOM | 1829 | HA   | THR | 116 | 17.848 | 37.396 | 9.171  |
| ATOM | 1830 | CB   | THR | 116 | 17.778 | 35.644 | 7.928  |
| ATOM | 1831 | HB   | THR | 116 | 17.151 | 34.758 | 7.844  |
| ATOM | 1832 | CG2  | THR | 116 | 17.650 | 36.485 | 6.653  |
| ATOM | 1833 | 1HG2 | THR | 116 | 17.438 | 35.814 | 5.822  |
| ATOM | 1834 | ZHG2 | THR | 116 | 16.845 | 37.211 | 6.737  |
| ATOM | 1835 | ZHG2 | THR | 116 | 18.584 | 37.012 | 6.449  |
| ATOM | 1836 | OG1  | THR | 116 | 19.130 | 35.259 | 7.952  |
| ATOM | 1837 | 1HG  | THR | 116 | 19.244 | 34.496 | 8.551  |
| ATOM | 1838 | C    | THR | 116 | 15.872 | 36.601 | 9.267  |
| ATOM | 1839 | O    | THR | 116 | 15.365 | 37.620 | 8.788  |
| ATOM | 1840 | N    | LYS | 117 | 15.131 | 35.669 | 9.888  |
| ATOM | 1841 | H    | LYS | 117 | 15.606 | 34.867 | 10.295 |
| ATOM | 1842 | CA   | LYS | 117 | 13.665 | 35.735 | 10.054 |
| ATOM | 1843 | HA   | LYS | 117 | 13.204 | 36.038 | 9.112  |
| ATOM | 1844 | CB   | LYS | 117 | 13.114 | 34.353 | 10.448 |
| ATOM | 1845 | ZHB  | LYS | 117 | 13.812 | 33.851 | 11.120 |
| ATOM | 1846 | ZHB  | LYS | 117 | 12.159 | 34.466 | 10.969 |
| ATOM | 1847 | CG   | LYS | 117 | 12.882 | 33.498 | 9.201  |
| ATOM | 1848 | ZHG  | LYS | 117 | 12.126 | 33.977 | 8.575  |
| ATOM | 1849 | ZHG  | LYS | 117 | 13.814 | 33.428 | 8.636  |
| ATOM | 1850 | CD   | LYS | 117 | 12.400 | 32.096 | 9.580  |
| ATOM | 1851 | ZHD  | LYS | 117 | 13.092 | 31.661 | 10.306 |
| ATOM | 1852 | ZHD  | LYS | 117 | 11.398 | 32.150 | 10.011 |
| ATOM | 1853 | CE   | LYS | 117 | 12.388 | 31.253 | 8.308  |
| ATOM | 1854 | ZHE  | LYS | 117 | 11.667 | 31.672 | 7.601  |
| ATOM | 1855 | ZHE  | LYS | 117 | 13.383 | 31.323 | 7.860  |
| ATOM | 1856 | NZ   | LYS | 117 | 12.116 | 29.831 | 8.597  |
| ATOM | 1857 | 1HZ  | LYS | 117 | 12.784 | 29.482 | 9.276  |
| ATOM | 1858 | ZHZ  | LYS | 117 | 11.175 | 29.634 | 8.888  |
| ATOM | 1859 | ZHZ  | LYS | 117 | 12.401 | 29.258 | 7.803  |
| ATOM | 1860 | C    | LYS | 117 | 13.190 | 36.782 | 11.060 |
| ATOM | 1861 | O    | LYS | 117 | 12.187 | 37.424 | 10.785 |
| ATOM | 1862 | N    | ILE | 118 | 13.894 | 36.985 | 12.176 |
| ATOM | 1863 | H    | ILE | 118 | 14.702 | 36.401 | 12.357 |
| ATOM | 1864 | CA   | ILE | 118 | 13.462 | 37.968 | 13.187 |
| ATOM | 1865 | HA   | ILE | 118 | 12.395 | 38.149 | 13.044 |
| ATOM | 1866 | CB   | ILE | 118 | 13.599 | 37.416 | 14.621 |
| ATOM | 1867 | HB   | ILE | 118 | 13.184 | 38.171 | 15.290 |
| ATOM | 1868 | CG2  | ILE | 118 | 12.754 | 36.131 | 14.766 |
| ATOM | 1869 | 1HG2 | ILE | 118 | 11.789 | 36.250 | 14.275 |

|      |      |      |     |     |        |        |        |
|------|------|------|-----|-----|--------|--------|--------|
| ATOM | 1870 | ZHG2 | ILE | 118 | 13.275 | 35.282 | 14.321 |
| ATOM | 1871 | 3HG2 | ILE | 118 | 12.571 | 35.917 | 15.817 |
| ATOM | 1872 | CG1  | ILE | 118 | 15.061 | 37.156 | 15.038 |
| ATOM | 1873 | ZHG1 | ILE | 118 | 15.442 | 36.287 | 14.505 |
| ATOM | 1874 | 3HG1 | ILE | 118 | 15.685 | 38.010 | 14.774 |
| ATOM | 1875 | CD1  | ILE | 118 | 15.209 | 36.912 | 16.543 |
| ATOM | 1876 | 1HD1 | ILE | 118 | 16.199 | 36.516 | 16.735 |
| ATOM | 1877 | ZHD1 | ILE | 118 | 15.086 | 37.847 | 17.086 |
| ATOM | 1878 | 3HD1 | ILE | 118 | 14.483 | 36.186 | 16.905 |
| ATOM | 1879 | C    | ILE | 118 | 14.106 | 39.348 | 13.002 |
| ATOM | 1880 | O    | ILE | 118 | 13.525 | 40.356 | 13.399 |
| ATOM | 1881 | N    | ALA | 119 | 15.276 | 39.419 | 12.358 |
| ATOM | 1882 | H    | ALA | 119 | 15.746 | 38.555 | 12.109 |
| ATOM | 1883 | CA   | ALA | 119 | 15.972 | 40.673 | 12.076 |
| ATOM | 1884 | HA   | ALA | 119 | 15.837 | 41.341 | 12.929 |
| ATOM | 1885 | CB   | ALA | 119 | 17.468 | 40.378 | 11.944 |
| ATOM | 1886 | 1HB  | ALA | 119 | 17.651 | 39.750 | 11.071 |
| ATOM | 1887 | ZHB  | ALA | 119 | 18.014 | 41.315 | 11.827 |
| ATOM | 1888 | 3HB  | ALA | 119 | 17.825 | 39.865 | 12.839 |
| ATOM | 1889 | C    | ALA | 119 | 15.434 | 41.423 | 10.844 |
| ATOM | 1890 | O    | ALA | 119 | 15.709 | 42.612 | 10.699 |
| ATOM | 1891 | N    | THR | 120 | 14.661 | 40.777 | 9.962  |
| ATOM | 1892 | H    | THR | 120 | 14.446 | 39.801 | 10.119 |
| ATOM | 1893 | CA   | THR | 120 | 13.926 | 41.467 | 8.882  |
| ATOM | 1894 | HA   | THR | 120 | 14.600 | 42.166 | 8.388  |
| ATOM | 1895 | CB   | THR | 120 | 13.376 | 40.491 | 7.823  |
| ATOM | 1896 | HB   | THR | 120 | 12.434 | 40.884 | 7.439  |
| ATOM | 1897 | CG2  | THR | 120 | 14.329 | 40.309 | 6.644  |
| ATOM | 1898 | 1HG2 | THR | 120 | 13.835 | 39.686 | 5.895  |
| ATOM | 1899 | ZHG2 | THR | 120 | 14.547 | 41.280 | 6.200  |
| ATOM | 1900 | 3HG2 | THR | 120 | 15.252 | 39.830 | 6.970  |
| ATOM | 1901 | OG1  | THR | 120 | 13.148 | 39.214 | 8.366  |
| ATOM | 1902 | 1HG  | THR | 120 | 13.967 | 38.692 | 8.341  |
| ATOM | 1903 | C    | THR | 120 | 12.787 | 42.318 | 9.446  |
| ATOM | 1904 | O    | THR | 120 | 12.813 | 43.540 | 9.292  |
| ATOM | 1905 | N    | SER | 121 | 11.865 | 41.705 | 10.195 |
| ATOM | 1906 | H    | SER | 121 | 11.860 | 40.691 | 10.224 |
| ATOM | 1907 | CA   | SER | 121 | 10.697 | 42.380 | 10.790 |
| ATOM | 1908 | HA   | SER | 121 | 10.077 | 42.772 | 9.983  |
| ATOM | 1909 | CB   | SER | 121 | 9.884  | 41.356 | 11.584 |
| ATOM | 1910 | ZHB  | SER | 121 | 10.408 | 41.143 | 12.518 |
| ATOM | 1911 | 3HB  | SER | 121 | 8.906  | 41.777 | 11.819 |
| ATOM | 1912 | OG   | SER | 121 | 9.733  | 40.146 | 10.880 |
| ATOM | 1913 | HG   | SER | 121 | 9.280  | 40.338 | 10.041 |
| ATOM | 1914 | C    | SER | 121 | 11.042 | 43.537 | 11.741 |
| ATOM | 1915 | O    | SER | 121 | 10.205 | 44.395 | 12.025 |
| ATOM | 1916 | N    | LEU | 122 | 12.278 | 43.577 | 12.250 |
| ATOM | 1917 | H    | LEU | 122 | 12.909 | 42.833 | 11.996 |
| ATOM | 1918 | CA   | LEU | 122 | 12.784 | 44.620 | 13.143 |
| ATOM | 1919 | HA   | LEU | 122 | 12.115 | 44.690 | 14.001 |
| ATOM | 1920 | CB   | LEU | 122 | 14.173 | 44.153 | 13.617 |
| ATOM | 1921 | ZHB  | LEU | 122 | 14.059 | 43.173 | 14.085 |
| ATOM | 1922 | 3HB  | LEU | 122 | 14.812 | 44.034 | 12.742 |
| ATOM | 1923 | CG   | LEU | 122 | 14.897 | 45.087 | 14.603 |
| ATOM | 1924 | HG   | LEU | 122 | 15.138 | 46.025 | 14.105 |
| ATOM | 1925 | CD1  | LEU | 122 | 14.061 | 45.382 | 15.843 |
| ATOM | 1926 | 1HD1 | LEU | 122 | 13.257 | 46.063 | 15.577 |
| ATOM | 1927 | ZHD1 | LEU | 122 | 14.678 | 45.856 | 16.606 |
| ATOM | 1928 | 3HD1 | LEU | 122 | 13.646 | 44.457 | 16.242 |
| ATOM | 1929 | CD2  | LEU | 122 | 16.191 | 44.425 | 15.068 |
| ATOM | 1930 | 1HD2 | LEU | 122 | 15.971 | 43.547 | 15.672 |
| ATOM | 1931 | ZHD2 | LEU | 122 | 16.788 | 44.133 | 14.208 |
| ATOM | 1932 | 3HD2 | LEU | 122 | 16.759 | 45.134 | 15.667 |
| ATOM | 1933 | C    | LEU | 122 | 12.826 | 46.010 | 12.481 |
| ATOM | 1934 | O    | LEU | 122 | 12.544 | 47.008 | 13.142 |
| ATOM | 1935 | N    | PHE | 123 | 13.134 | 46.079 | 11.182 |
| ATOM | 1936 | H    | PHE | 123 | 13.322 | 45.211 | 10.692 |
| ATOM | 1937 | CA   | PHE | 123 | 13.323 | 47.343 | 10.448 |
| ATOM | 1938 | HA   | PHE | 123 | 13.354 | 48.161 | 11.165 |
| ATOM | 1939 | CB   | PHE | 123 | 14.682 | 47.314 | 9.740  |
| ATOM | 1940 | ZHB  | PHE | 123 | 14.674 | 46.527 | 8.985  |
| ATOM | 1941 | 3HB  | PHE | 123 | 14.844 | 48.266 | 9.235  |
| ATOM | 1942 | CG   | PHE | 123 | 15.821 | 47.079 | 10.708 |
| ATOM | 1943 | CD1  | PHE | 123 | 16.204 | 48.096 | 11.601 |
| ATOM | 1944 | HD1  | PHE | 123 | 15.726 | 49.063 | 11.545 |
| ATOM | 1945 | CE1  | PHE | 123 | 17.164 | 47.837 | 12.594 |
| ATOM | 1946 | HE1  | PHE | 123 | 17.452 | 48.615 | 13.287 |
| ATOM | 1947 | CZ   | PHE | 123 | 17.724 | 46.552 | 12.708 |
| ATOM | 1948 | HZ   | PHE | 123 | 18.425 | 46.343 | 13.504 |
| ATOM | 1949 | CE2  | PHE | 123 | 17.356 | 45.541 | 11.800 |
| ATOM | 1950 | HE2  | PHE | 123 | 17.769 | 44.548 | 11.884 |
| ATOM | 1951 | CD2  | PHE | 123 | 16.413 | 45.808 | 10.795 |
| ATOM | 1952 | HD2  | PHE | 123 | 16.103 | 45.020 | 10.124 |
| ATOM | 1953 | C    | PHE | 123 | 12.180 | 47.683 | 9.484  |
| ATOM | 1954 | O    | PHE | 123 | 12.146 | 48.768 | 8.911  |
| ATOM | 1955 | N    | GLU | 124 | 11.222 | 46.773 | 9.327  |
| ATOM | 1956 | H    | GLU | 124 | 11.331 | 45.896 | 9.816  |
| ATOM | 1957 | CA   | GLU | 124 | 10.121 | 46.837 | 8.358  |
| ATOM | 1958 | HA   | GLU | 124 | 10.527 | 46.918 | 7.348  |
| ATOM | 1959 | CB   | GLU | 124 | 9.390  | 45.499 | 8.514  |
| ATOM | 1960 | ZHB  | GLU | 124 | 10.142 | 44.729 | 8.696  |
| ATOM | 1961 | 3HB  | GLU | 124 | 8.748  | 45.546 | 9.396  |
| ATOM | 1962 | CG   | GLU | 124 | 8.567  | 45.039 | 7.315  |
| ATOM | 1963 | ZHG  | GLU | 124 | 9.187  | 45.066 | 6.415  |
| ATOM | 1964 | 3HG  | GLU | 124 | 7.715  | 45.710 | 7.176  |
| ATOM | 1965 | CD   | GLU | 124 | 8.110  | 43.604 | 7.611  |
| ATOM | 1966 | OE1  | GLU | 124 | 8.957  | 42.688 | 7.474  |
| ATOM | 1967 | OE2  | GLU | 124 | 6.974  | 43.444 | 8.105  |
| ATOM | 1968 | C    | GLU | 124 | 9.173  | 48.028 | 8.584  |
| ATOM | 1969 | O    | GLU | 124 | 8.638  | 48.599 | 7.642  |
| ATOM | 1970 | N    | SER | 125 | 9.031  | 48.458 | 9.842  |
| ATOM | 1971 | H    | SER | 125 | 9.539  | 47.953 | 10.549 |
| ATOM | 1972 | CA   | SER | 125 | 8.285  | 49.663 | 10.248 |
| ATOM | 1973 | HA   | SER | 125 | 7.609  | 49.937 | 9.436  |
| ATOM | 1974 | CB   | SER | 125 | 7.421  | 49.358 | 11.475 |

|      |      |      |     |     |        |        |        |
|------|------|------|-----|-----|--------|--------|--------|
| ATOM | 1975 | ZHB  | SER | 125 | 6.933  | 50.273 | 11.814 |
| ATOM | 1976 | 3HB  | SER | 125 | 6.648  | 48.644 | 11.191 |
| ATOM | 1977 | OG   | SER | 125 | 8.208  | 48.809 | 12.526 |
| ATOM | 1978 | HG   | SER | 125 | 8.226  | 47.855 | 12.378 |
| ATOM | 1979 | C    | SER | 125 | 9.173  | 50.893 | 10.489 |
| ATOM | 1980 | O    | SER | 125 | 8.734  | 51.854 | 11.120 |
| ATOM | 1981 | N    | GLY | 126 | 10.432 | 50.857 | 10.046 |
| ATOM | 1982 | H    | GLY | 126 | 10.743 | 50.030 | 9.547  |
| ATOM | 1983 | CA   | GLY | 126 | 11.407 | 51.933 | 10.218 |
| ATOM | 1984 | ZHA  | GLY | 126 | 11.725 | 52.263 | 9.229  |
| ATOM | 1985 | 3HA  | GLY | 126 | 10.951 | 52.786 | 10.720 |
| ATOM | 1986 | C    | GLY | 126 | 12.650 | 51.525 | 11.013 |
| ATOM | 1987 | O    | GLY | 126 | 12.699 | 50.482 | 11.671 |
| ATOM | 1988 | N    | ILE | 127 | 13.663 | 52.389 | 10.963 |
| ATOM | 1989 | H    | ILE | 127 | 13.523 | 53.253 | 10.460 |
| ATOM | 1990 | CA   | ILE | 127 | 14.971 | 52.207 | 11.599 |
| ATOM | 1991 | HA   | ILE | 127 | 14.934 | 51.293 | 12.195 |
| ATOM | 1992 | CB   | ILE | 127 | 16.068 | 52.002 | 10.527 |
| ATOM | 1993 | HB   | ILE | 127 | 15.771 | 51.131 | 9.941  |
| ATOM | 1994 | CG2  | ILE | 127 | 16.188 | 53.195 | 9.557  |
| ATOM | 1995 | 1HG2 | ILE | 127 | 15.226 | 53.417 | 9.096  |
| ATOM | 1996 | ZHG2 | ILE | 127 | 16.536 | 54.079 | 10.090 |
| ATOM | 1997 | 3HG2 | ILE | 127 | 16.894 | 52.963 | 8.762  |
| ATOM | 1998 | CG1  | ILE | 127 | 17.432 | 51.690 | 11.182 |
| ATOM | 1999 | ZHG1 | ILE | 127 | 17.872 | 52.607 | 11.578 |
| ATOM | 2000 | 3HG1 | ILE | 127 | 17.280 | 51.003 | 12.015 |
| ATOM | 2001 | CD1  | ILE | 127 | 18.429 | 51.033 | 10.219 |
| ATOM | 2002 | 1HD1 | ILE | 127 | 18.005 | 50.107 | 9.832  |
| ATOM | 2003 | ZHD1 | ILE | 127 | 18.667 | 51.698 | 9.390  |
| ATOM | 2004 | 3HD1 | ILE | 127 | 19.349 | 50.805 | 10.758 |
| ATOM | 2005 | C    | ILE | 127 | 15.268 | 53.355 | 12.567 |
| ATOM | 2006 | O    | ILE | 127 | 15.068 | 54.527 | 12.253 |
| ATOM | 2007 | N    | ASN | 128 | 15.759 | 53.004 | 13.752 |
| ATOM | 2008 | H    | ASN | 128 | 15.958 | 52.030 | 13.926 |
| ATOM | 2009 | CA   | ASN | 128 | 16.247 | 53.933 | 14.763 |
| ATOM | 2010 | HA   | ASN | 128 | 16.615 | 54.829 | 14.261 |
| ATOM | 2011 | CB   | ASN | 128 | 15.077 | 54.346 | 15.683 |
| ATOM | 2012 | ZHB  | ASN | 128 | 15.409 | 55.147 | 16.338 |
| ATOM | 2013 | 3HB  | ASN | 128 | 14.279 | 54.752 | 15.063 |
| ATOM | 2014 | CG   | ASN | 128 | 14.510 | 53.231 | 16.555 |
| ATOM | 2015 | OD1  | ASN | 128 | 15.232 | 52.419 | 17.104 |
| ATOM | 2016 | ND2  | ASN | 128 | 13.205 | 53.168 | 16.701 |
| ATOM | 2017 | 1HD2 | ASN | 128 | 12.800 | 52.454 | 17.308 |
| ATOM | 2018 | ZHD2 | ASN | 128 | 12.610 | 53.850 | 16.273 |
| ATOM | 2019 | C    | ASN | 128 | 17.450 | 53.302 | 15.488 |
| ATOM | 2020 | O    | ASN | 128 | 17.734 | 52.115 | 15.303 |
| ATOM | 2021 | N    | TRP | 129 | 18.168 | 54.087 | 16.294 |
| ATOM | 2022 | H    | TRP | 129 | 17.839 | 55.019 | 16.496 |
| ATOM | 2023 | CA   | TRP | 129 | 19.387 | 53.617 | 16.959 |
| ATOM | 2024 | HA   | TRP | 129 | 20.078 | 53.224 | 16.212 |
| ATOM | 2025 | CB   | TRP | 129 | 20.051 | 54.797 | 17.669 |
| ATOM | 2026 | ZHB  | TRP | 129 | 20.325 | 55.551 | 16.932 |
| ATOM | 2027 | 3HB  | TRP | 129 | 19.327 | 55.249 | 18.348 |
| ATOM | 2028 | CG   | TRP | 129 | 21.280 | 54.460 | 18.450 |
| ATOM | 2029 | CD1  | TRP | 129 | 21.378 | 54.539 | 19.793 |
| ATOM | 2030 | HD1  | TRP | 129 | 20.582 | 54.851 | 20.457 |
| ATOM | 2031 | NE1  | TRP | 129 | 22.669 | 54.253 | 20.182 |
| ATOM | 2032 | HE1  | TRP | 129 | 22.987 | 54.362 | 21.133 |
| ATOM | 2033 | CE2  | TRP | 129 | 23.477 | 53.982 | 19.102 |
| ATOM | 2034 | CZ2  | TRP | 129 | 24.844 | 53.702 | 18.981 |
| ATOM | 2035 | HZ2  | TRP | 129 | 25.473 | 53.686 | 19.856 |
| ATOM | 2036 | CH2  | TRP | 129 | 25.378 | 53.451 | 17.708 |
| ATOM | 2037 | HH2  | TRP | 129 | 26.434 | 53.251 | 17.597 |
| ATOM | 2038 | CZ3  | TRP | 129 | 24.535 | 53.445 | 16.582 |
| ATOM | 2039 | HZ3  | TRP | 129 | 24.949 | 53.219 | 15.609 |
| ATOM | 2040 | CE3  | TRP | 129 | 23.163 | 53.740 | 16.717 |
| ATOM | 2041 | HE3  | TRP | 129 | 22.528 | 53.738 | 15.850 |
| ATOM | 2042 | CD2  | TRP | 129 | 22.603 | 54.046 | 17.977 |
| ATOM | 2043 | C    | TRP | 129 | 19.107 | 52.481 | 17.947 |
| ATOM | 2044 | O    | TRP | 129 | 19.832 | 51.490 | 17.963 |
| ATOM | 2045 | N    | GLY | 130 | 18.018 | 52.571 | 18.715 |
| ATOM | 2046 | H    | GLY | 130 | 17.433 | 53.394 | 18.640 |
| ATOM | 2047 | CA   | GLY | 130 | 17.654 | 51.539 | 19.685 |
| ATOM | 2048 | ZHA  | GLY | 130 | 18.451 | 51.443 | 20.423 |
| ATOM | 2049 | 3HA  | GLY | 130 | 16.745 | 51.856 | 20.187 |
| ATOM | 2050 | C    | GLY | 130 | 17.406 | 50.159 | 19.062 |
| ATOM | 2051 | O    | GLY | 130 | 17.863 | 49.148 | 19.593 |
| ATOM | 2052 | N    | ARG | 131 | 16.784 | 50.101 | 17.876 |
| ATOM | 2053 | H    | ARG | 131 | 16.397 | 50.969 | 17.512 |
| ATOM | 2054 | CA   | ARG | 131 | 16.627 | 48.861 | 17.091 |
| ATOM | 2055 | HA   | ARG | 131 | 16.221 | 48.082 | 17.737 |
| ATOM | 2056 | CB   | ARG | 131 | 15.652 | 49.098 | 15.925 |
| ATOM | 2057 | ZHB  | ARG | 131 | 15.994 | 49.959 | 15.348 |
| ATOM | 2058 | 3HB  | ARG | 131 | 15.666 | 48.224 | 15.272 |
| ATOM | 2059 | CG   | ARG | 131 | 14.203 | 49.330 | 16.385 |
| ATOM | 2060 | ZHG  | ARG | 131 | 13.822 | 48.428 | 16.864 |
| ATOM | 2061 | 3HG  | ARG | 131 | 14.163 | 50.142 | 17.108 |
| ATOM | 2062 | CD   | ARG | 131 | 13.322 | 49.682 | 15.180 |
| ATOM | 2063 | ZHD  | ARG | 131 | 13.759 | 50.532 | 14.653 |
| ATOM | 2064 | 3HD  | ARG | 131 | 13.298 | 48.830 | 14.505 |
| ATOM | 2065 | NE   | ARG | 131 | 11.959 | 50.039 | 15.601 |
| ATOM | 2066 | HE   | ARG | 131 | 11.840 | 50.384 | 16.556 |
| ATOM | 2067 | CZ   | ARG | 131 | 10.864 | 50.084 | 14.870 |
| ATOM | 2068 | NH1  | ARG | 131 | 10.813 | 49.738 | 13.617 |
| ATOM | 2069 | 1HH1 | ARG | 131 | 11.674 | 49.528 | 13.123 |
| ATOM | 2070 | ZHH1 | ARG | 131 | 9.933  | 49.732 | 13.126 |
| ATOM | 2071 | NH2  | ARG | 131 | 9.754  | 50.487 | 15.405 |
| ATOM | 2072 | 1HH2 | ARG | 131 | 9.752  | 50.673 | 16.418 |
| ATOM | 2073 | ZHH2 | ARG | 131 | 8.946  | 50.645 | 14.840 |
| ATOM | 2074 | C    | ARG | 131 | 17.967 | 48.320 | 16.579 |
| ATOM | 2075 | O    | ARG | 131 | 18.149 | 47.105 | 16.545 |
| ATOM | 2076 | N    | VAL | 132 | 18.922 | 49.188 | 16.228 |
| ATOM | 2077 | H    | VAL | 132 | 18.727 | 50.177 | 16.321 |
| ATOM | 2078 | CA   | VAL | 132 | 20.288 | 48.766 | 15.855 |
| ATOM | 2079 | HA   | VAL | 132 | 20.207 | 47.960 | 15.127 |

|      |      |      |     |     |        |        |        |
|------|------|------|-----|-----|--------|--------|--------|
| ATOM | 2080 | CB   | VAL | 132 | 21.093 | 49.911 | 15.199 |
| ATOM | 2081 | HB   | VAL | 132 | 21.113 | 50.769 | 15.866 |
| ATOM | 2082 | CG1  | VAL | 132 | 22.547 | 49.512 | 14.900 |
| ATOM | 2083 | 1HG1 | VAL | 132 | 23.121 | 49.508 | 15.828 |
| ATOM | 2084 | 2HG1 | VAL | 132 | 22.587 | 48.520 | 14.450 |
| ATOM | 2085 | 3HG1 | VAL | 132 | 23.008 | 50.232 | 14.224 |
| ATOM | 2086 | CG2  | VAL | 132 | 20.445 | 50.352 | 13.880 |
| ATOM | 2087 | 1HG2 | VAL | 132 | 19.398 | 50.605 | 14.035 |
| ATOM | 2088 | 2HG2 | VAL | 132 | 20.955 | 51.239 | 13.505 |
| ATOM | 2089 | 3HG2 | VAL | 132 | 20.512 | 49.555 | 13.140 |
| ATOM | 2090 | C    | VAL | 132 | 21.029 | 48.172 | 17.058 |
| ATOM | 2091 | O    | VAL | 132 | 21.641 | 47.114 | 16.914 |
| ATOM | 2092 | N    | VAL | 133 | 20.918 | 48.770 | 18.250 |
| ATOM | 2093 | H    | VAL | 133 | 20.447 | 49.667 | 18.313 |
| ATOM | 2094 | CA   | VAL | 133 | 21.534 | 48.203 | 19.462 |
| ATOM | 2095 | HA   | VAL | 133 | 22.561 | 47.941 | 19.211 |
| ATOM | 2096 | CB   | VAL | 133 | 21.609 | 49.217 | 20.617 |
| ATOM | 2097 | HB   | VAL | 133 | 20.599 | 49.481 | 20.935 |
| ATOM | 2098 | CG1  | VAL | 133 | 22.385 | 48.611 | 21.795 |
| ATOM | 2099 | 1HG1 | VAL | 133 | 21.748 | 47.906 | 22.331 |
| ATOM | 2100 | 2HG1 | VAL | 133 | 23.272 | 48.084 | 21.439 |
| ATOM | 2101 | 3HG1 | VAL | 133 | 22.708 | 49.386 | 22.485 |
| ATOM | 2102 | CG2  | VAL | 133 | 22.350 | 50.499 | 20.213 |
| ATOM | 2103 | 1HG2 | VAL | 133 | 23.372 | 50.265 | 19.916 |
| ATOM | 2104 | 2HG2 | VAL | 133 | 21.849 | 50.996 | 19.386 |
| ATOM | 2105 | 3HG2 | VAL | 133 | 22.368 | 51.193 | 21.053 |
| ATOM | 2106 | C    | VAL | 133 | 20.850 | 46.901 | 19.898 |
| ATOM | 2107 | O    | VAL | 133 | 21.543 | 45.971 | 20.302 |
| ATOM | 2108 | N    | ALA | 134 | 19.529 | 46.767 | 19.745 |
| ATOM | 2109 | H    | ALA | 134 | 18.981 | 47.582 | 19.485 |
| ATOM | 2110 | CA   | ALA | 134 | 18.818 | 45.512 | 20.023 |
| ATOM | 2111 | HA   | ALA | 134 | 19.043 | 45.215 | 21.048 |
| ATOM | 2112 | CB   | ALA | 134 | 17.307 | 45.759 | 19.925 |
| ATOM | 2113 | 1HB  | ALA | 134 | 17.027 | 46.591 | 20.572 |
| ATOM | 2114 | 2HB  | ALA | 134 | 17.021 | 45.983 | 18.896 |
| ATOM | 2115 | 3HB  | ALA | 134 | 16.772 | 44.868 | 20.258 |
| ATOM | 2116 | C    | ALA | 134 | 19.275 | 44.361 | 19.102 |
| ATOM | 2117 | O    | ALA | 134 | 19.464 | 43.236 | 19.566 |
| ATOM | 2118 | N    | LEU | 135 | 19.536 | 44.642 | 17.817 |
| ATOM | 2119 | H    | LEU | 135 | 19.353 | 45.582 | 17.480 |
| ATOM | 2120 | CA   | LEU | 135 | 20.145 | 43.673 | 16.895 |
| ATOM | 2121 | HA   | LEU | 135 | 19.538 | 42.766 | 16.909 |
| ATOM | 2122 | CB   | LEU | 135 | 20.149 | 44.267 | 15.473 |
| ATOM | 2123 | 2HB  | LEU | 135 | 19.141 | 44.603 | 15.227 |
| ATOM | 2124 | 3HB  | LEU | 135 | 20.802 | 45.138 | 15.459 |
| ATOM | 2125 | CG   | LEU | 135 | 20.627 | 43.280 | 14.389 |
| ATOM | 2126 | HG   | LEU | 135 | 21.610 | 42.889 | 14.647 |
| ATOM | 2127 | CD1  | LEU | 135 | 19.656 | 42.109 | 14.220 |
| ATOM | 2128 | 1HD1 | LEU | 135 | 18.642 | 42.475 | 14.070 |
| ATOM | 2129 | 2HD1 | LEU | 135 | 19.951 | 41.510 | 13.361 |
| ATOM | 2130 | 3HD1 | LEU | 135 | 19.689 | 41.469 | 15.101 |
| ATOM | 2131 | CD2  | LEU | 135 | 20.754 | 44.001 | 13.048 |
| ATOM | 2132 | 1HD2 | LEU | 135 | 21.043 | 43.292 | 12.272 |
| ATOM | 2133 | 2HD2 | LEU | 135 | 19.810 | 44.464 | 12.782 |
| ATOM | 2134 | 3HD2 | LEU | 135 | 21.521 | 44.772 | 13.121 |
| ATOM | 2135 | C    | LEU | 135 | 21.563 | 43.273 | 17.329 |
| ATOM | 2136 | O    | LEU | 135 | 21.917 | 42.100 | 17.249 |
| ATOM | 2137 | N    | LEU | 136 | 22.355 | 44.229 | 17.813 |
| ATOM | 2138 | H    | LEU | 136 | 22.018 | 45.185 | 17.780 |
| ATOM | 2139 | CA   | LEU | 136 | 23.698 | 43.998 | 18.338 |
| ATOM | 2140 | HA   | LEU | 136 | 24.259 | 43.435 | 17.594 |
| ATOM | 2141 | CB   | LEU | 136 | 24.330 | 45.375 | 18.571 |
| ATOM | 2142 | 2HB  | LEU | 136 | 23.571 | 46.144 | 18.479 |
| ATOM | 2143 | 3HB  | LEU | 136 | 24.725 | 45.451 | 19.586 |
| ATOM | 2144 | CG   | LEU | 136 | 25.434 | 45.673 | 17.541 |
| ATOM | 2145 | HG   | LEU | 136 | 25.238 | 45.142 | 16.602 |
| ATOM | 2146 | CD1  | LEU | 136 | 25.516 | 47.166 | 17.242 |
| ATOM | 2147 | 1HD1 | LEU | 136 | 24.637 | 47.451 | 16.676 |
| ATOM | 2148 | 2HD1 | LEU | 136 | 26.401 | 47.371 | 16.636 |
| ATOM | 2149 | 3HD1 | LEU | 136 | 25.575 | 47.737 | 18.167 |
| ATOM | 2150 | CD2  | LEU | 136 | 26.817 | 45.275 | 18.057 |
| ATOM | 2151 | 1HD2 | LEU | 136 | 27.566 | 45.546 | 17.314 |
| ATOM | 2152 | 2HD2 | LEU | 136 | 27.034 | 45.799 | 18.997 |
| ATOM | 2153 | 3HD2 | LEU | 136 | 26.835 | 44.197 | 18.216 |
| ATOM | 2154 | C    | LEU | 136 | 23.704 | 43.150 | 19.612 |
| ATOM | 2155 | O    | LEU | 136 | 24.493 | 42.214 | 19.728 |
| ATOM | 2156 | N    | GLY | 137 | 22.789 | 43.423 | 20.542 |
| ATOM | 2157 | H    | GLY | 137 | 22.205 | 44.239 | 20.403 |
| ATOM | 2158 | CA   | GLY | 137 | 22.603 | 42.639 | 21.766 |
| ATOM | 2159 | 2HA  | GLY | 137 | 23.527 | 42.645 | 22.345 |
| ATOM | 2160 | 3HA  | GLY | 137 | 21.808 | 43.092 | 22.361 |
| ATOM | 2161 | C    | GLY | 137 | 22.220 | 41.184 | 21.480 |
| ATOM | 2162 | O    | GLY | 137 | 22.862 | 40.263 | 21.994 |
| ATOM | 2163 | N    | PHE | 138 | 21.260 | 40.968 | 20.574 |
| ATOM | 2164 | H    | PHE | 138 | 20.738 | 41.759 | 20.209 |
| ATOM | 2165 | CA   | PHE | 138 | 20.918 | 39.626 | 20.101 |
| ATOM | 2166 | HA   | PHE | 138 | 20.708 | 39.005 | 20.973 |
| ATOM | 2167 | CB   | PHE | 138 | 19.652 | 39.694 | 19.238 |
| ATOM | 2168 | 2HB  | PHE | 138 | 18.854 | 40.165 | 19.813 |
| ATOM | 2169 | 3HB  | PHE | 138 | 19.849 | 40.324 | 18.369 |
| ATOM | 2170 | CG   | PHE | 138 | 19.176 | 38.326 | 18.782 |
| ATOM | 2171 | CD1  | PHE | 138 | 18.776 | 37.371 | 19.738 |
| ATOM | 2172 | HD1  | PHE | 138 | 18.760 | 37.629 | 20.787 |
| ATOM | 2173 | CE1  | PHE | 138 | 18.407 | 36.076 | 19.334 |
| ATOM | 2174 | HE1  | PHE | 138 | 18.109 | 35.346 | 20.072 |
| ATOM | 2175 | CZ   | PHE | 138 | 18.417 | 35.736 | 17.971 |
| ATOM | 2176 | HZ   | PHE | 138 | 18.111 | 34.749 | 17.656 |
| ATOM | 2177 | CE2  | PHE | 138 | 18.788 | 36.696 | 17.013 |
| ATOM | 2178 | HE2  | PHE | 138 | 18.750 | 36.446 | 15.964 |
| ATOM | 2179 | CD2  | PHE | 138 | 19.172 | 37.988 | 17.416 |
| ATOM | 2180 | HD2  | PHE | 138 | 19.461 | 38.719 | 16.674 |
| ATOM | 2181 | C    | PHE | 138 | 22.084 | 38.966 | 19.343 |
| ATOM | 2182 | O    | PHE | 138 | 22.358 | 37.785 | 19.550 |
| ATOM | 2183 | N    | GLY | 139 | 22.824 | 39.721 | 18.523 |
| ATOM | 2184 | H    | GLY | 139 | 22.520 | 40.674 | 18.346 |

|      |      |      |     |     |        |        |        |
|------|------|------|-----|-----|--------|--------|--------|
| ATOM | 2185 | CA   | GLY | 139 | 24.010 | 39.247 | 17.802 |
| ATOM | 2186 | ZHA  | GLY | 139 | 23.728 | 38.422 | 17.146 |
| ATOM | 2187 | 3HA  | GLY | 139 | 24.391 | 40.063 | 17.188 |
| ATOM | 2188 | C    | GLY | 139 | 25.144 | 38.779 | 18.722 |
| ATOM | 2189 | O    | GLY | 139 | 25.720 | 37.718 | 18.487 |
| ATOM | 2190 | N    | TYR | 140 | 25.416 | 39.498 | 19.816 |
| ATOM | 2191 | H    | TYR | 140 | 24.911 | 40.370 | 19.956 |
| ATOM | 2192 | CA   | TYR | 140 | 26.346 | 39.055 | 20.862 |
| ATOM | 2193 | HA   | TYR | 140 | 27.325 | 38.881 | 20.413 |
| ATOM | 2194 | CB   | TYR | 140 | 26.489 | 40.150 | 21.932 |
| ATOM | 2195 | ZHB  | TYR | 140 | 27.064 | 40.966 | 21.501 |
| ATOM | 2196 | 3HB  | TYR | 140 | 25.502 | 40.533 | 22.193 |
| ATOM | 2197 | CG   | TYR | 140 | 27.196 | 39.702 | 23.200 |
| ATOM | 2198 | CD1  | TYR | 140 | 28.545 | 39.311 | 23.131 |
| ATOM | 2199 | HD1  | TYR | 140 | 29.060 | 39.340 | 22.188 |
| ATOM | 2200 | CE1  | TYR | 140 | 29.217 | 38.863 | 24.280 |
| ATOM | 2201 | HE1  | TYR | 140 | 30.252 | 38.566 | 24.232 |
| ATOM | 2202 | CZ   | TYR | 140 | 28.535 | 38.794 | 25.509 |
| ATOM | 2203 | OH   | TYR | 140 | 29.194 | 38.327 | 26.597 |
| ATOM | 2204 | HH   | TYR | 140 | 28.616 | 38.335 | 27.406 |
| ATOM | 2205 | CE2  | TYR | 140 | 27.182 | 39.193 | 25.587 |
| ATOM | 2206 | HE2  | TYR | 140 | 26.669 | 39.148 | 26.536 |
| ATOM | 2207 | CD2  | TYR | 140 | 26.512 | 39.647 | 24.431 |
| ATOM | 2208 | HD2  | TYR | 140 | 25.472 | 39.945 | 24.493 |
| ATOM | 2209 | C    | TYR | 140 | 25.894 | 37.738 | 21.501 |
| ATOM | 2210 | O    | TYR | 140 | 26.684 | 36.798 | 21.603 |
| ATOM | 2211 | N    | ARG | 141 | 24.616 | 37.647 | 21.886 |
| ATOM | 2212 | H    | ARG | 141 | 24.023 | 38.464 | 21.762 |
| ATOM | 2213 | CA   | ARG | 141 | 24.036 | 36.456 | 22.525 |
| ATOM | 2214 | HA   | ARG | 141 | 24.692 | 36.143 | 23.335 |
| ATOM | 2215 | CB   | ARG | 141 | 22.648 | 36.825 | 23.092 |
| ATOM | 2216 | ZHB  | ARG | 141 | 22.048 | 37.283 | 22.305 |
| ATOM | 2217 | 3HB  | ARG | 141 | 22.134 | 35.920 | 23.403 |
| ATOM | 2218 | CG   | ARG | 141 | 22.704 | 37.790 | 24.294 |
| ATOM | 2219 | ZHG  | ARG | 141 | 23.291 | 38.670 | 24.036 |
| ATOM | 2220 | 3HG  | ARG | 141 | 21.695 | 38.116 | 24.538 |
| ATOM | 2221 | CD   | ARG | 141 | 23.310 | 37.138 | 25.541 |
| ATOM | 2222 | ZHD  | ARG | 141 | 22.691 | 36.288 | 25.835 |
| ATOM | 2223 | 3HD  | ARG | 141 | 24.308 | 36.777 | 25.292 |
| ATOM | 2224 | NE   | ARG | 141 | 23.411 | 38.078 | 26.674 |
| ATOM | 2225 | HE   | ARG | 141 | 22.763 | 38.869 | 26.736 |
| ATOM | 2226 | CZ   | ARG | 141 | 24.291 | 38.018 | 27.653 |
| ATOM | 2227 | NH1  | ARG | 141 | 25.210 | 37.104 | 27.746 |
| ATOM | 2228 | 1HH1 | ARG | 141 | 25.265 | 36.355 | 27.096 |
| ATOM | 2229 | 2HH1 | ARG | 141 | 25.868 | 37.217 | 28.525 |
| ATOM | 2230 | NH2  | ARG | 141 | 24.296 | 38.893 | 28.595 |
| ATOM | 2231 | 1HH2 | ARG | 141 | 23.446 | 39.448 | 28.726 |
| ATOM | 2232 | 2HH2 | ARG | 141 | 24.888 | 38.686 | 29.396 |
| ATOM | 2233 | C    | ARG | 141 | 24.015 | 35.243 | 21.588 |
| ATOM | 2234 | O    | ARG | 141 | 24.346 | 34.136 | 22.017 |
| ATOM | 2235 | N    | LEU | 142 | 23.755 | 35.450 | 20.300 |
| ATOM | 2236 | H    | LEU | 142 | 23.428 | 36.366 | 20.022 |
| ATOM | 2237 | CA   | LEU | 142 | 23.916 | 34.448 | 19.244 |
| ATOM | 2238 | HA   | LEU | 142 | 23.260 | 33.601 | 19.448 |
| ATOM | 2239 | CB   | LEU | 142 | 23.474 | 35.091 | 17.923 |
| ATOM | 2240 | ZHB  | LEU | 142 | 22.439 | 35.430 | 18.022 |
| ATOM | 2241 | 3HB  | LEU | 142 | 24.096 | 35.976 | 17.734 |
| ATOM | 2242 | CG   | LEU | 142 | 23.600 | 34.092 | 16.739 |
| ATOM | 2243 | HG   | LEU | 142 | 24.652 | 33.765 | 16.662 |
| ATOM | 2244 | CD1  | LEU | 142 | 22.640 | 32.889 | 16.888 |
| ATOM | 2245 | 1HD1 | LEU | 142 | 21.806 | 33.193 | 17.494 |
| ATOM | 2246 | 2HD1 | LEU | 142 | 23.135 | 32.017 | 17.297 |
| ATOM | 2247 | 3HD1 | LEU | 142 | 22.249 | 32.588 | 15.916 |
| ATOM | 2248 | CD2  | LEU | 142 | 23.242 | 34.821 | 15.426 |
| ATOM | 2249 | 1HD2 | LEU | 142 | 22.766 | 35.773 | 15.615 |
| ATOM | 2250 | 2HD2 | LEU | 142 | 24.116 | 35.004 | 14.810 |
| ATOM | 2251 | 3HD2 | LEU | 142 | 22.551 | 34.253 | 14.808 |
| ATOM | 2252 | C    | LEU | 142 | 25.364 | 33.925 | 19.152 |
| ATOM | 2253 | O    | LEU | 142 | 25.606 | 32.724 | 19.278 |
| ATOM | 2254 | N    | ALA | 143 | 26.323 | 34.840 | 18.981 |
| ATOM | 2255 | H    | ALA | 143 | 26.033 | 35.804 | 18.850 |
| ATOM | 2256 | CA   | ALA | 143 | 27.750 | 34.551 | 18.852 |
| ATOM | 2257 | HA   | ALA | 143 | 27.899 | 33.923 | 17.977 |
| ATOM | 2258 | CB   | ALA | 143 | 28.486 | 35.884 | 18.633 |
| ATOM | 2259 | 1HB  | ALA | 143 | 29.495 | 35.680 | 18.290 |
| ATOM | 2260 | ZHB  | ALA | 143 | 27.983 | 36.479 | 17.869 |
| ATOM | 2261 | 3HB  | ALA | 143 | 28.531 | 36.463 | 19.556 |
| ATOM | 2262 | C    | ALA | 143 | 28.292 | 33.781 | 20.064 |
| ATOM | 2263 | O    | ALA | 143 | 28.969 | 32.761 | 19.923 |
| ATOM | 2264 | N    | LEU | 144 | 27.914 | 34.203 | 21.272 |
| ATOM | 2265 | H    | LEU | 144 | 27.375 | 35.063 | 21.336 |
| ATOM | 2266 | CA   | LEU | 144 | 28.302 | 33.533 | 22.506 |
| ATOM | 2267 | HA   | LEU | 144 | 29.383 | 33.410 | 22.485 |
| ATOM | 2268 | CB   | LEU | 144 | 27.924 | 34.463 | 23.667 |
| ATOM | 2269 | ZHB  | LEU | 144 | 28.228 | 35.482 | 23.415 |
| ATOM | 2270 | 3HB  | LEU | 144 | 26.837 | 34.457 | 23.770 |
| ATOM | 2271 | CG   | LEU | 144 | 28.565 | 34.096 | 25.016 |
| ATOM | 2272 | HG   | LEU | 144 | 28.333 | 33.061 | 25.263 |
| ATOM | 2273 | CD1  | LEU | 144 | 30.086 | 34.281 | 25.025 |
| ATOM | 2274 | 1HD1 | LEU | 144 | 30.340 | 35.311 | 24.768 |
| ATOM | 2275 | 2HD1 | LEU | 144 | 30.474 | 34.053 | 26.016 |
| ATOM | 2276 | 3HD1 | LEU | 144 | 30.557 | 33.603 | 24.315 |
| ATOM | 2277 | CD2  | LEU | 144 | 27.977 | 35.000 | 26.100 |
| ATOM | 2278 | 1HD2 | LEU | 144 | 28.530 | 34.883 | 27.031 |
| ATOM | 2279 | 2HD2 | LEU | 144 | 26.938 | 34.727 | 26.270 |
| ATOM | 2280 | 3HD2 | LEU | 144 | 28.034 | 36.042 | 25.785 |
| ATOM | 2281 | C    | LEU | 144 | 27.674 | 32.131 | 22.622 |
| ATOM | 2282 | O    | LEU | 144 | 28.309 | 31.221 | 23.153 |
| ATOM | 2283 | N    | HIP | 145 | 26.473 | 31.908 | 22.071 |
| ATOM | 2284 | H    | HIP | 145 | 25.997 | 32.686 | 21.625 |
| ATOM | 2285 | CA   | HIP | 145 | 25.798 | 30.603 | 22.113 |
| ATOM | 2286 | HA   | HIP | 145 | 25.878 | 30.234 | 23.138 |
| ATOM | 2287 | CB   | HIP | 145 | 24.315 | 30.792 | 21.762 |
| ATOM | 2288 | ZHB  | HIP | 145 | 23.900 | 31.551 | 22.424 |
| ATOM | 2289 | 3HB  | HIP | 145 | 24.237 | 31.151 | 20.735 |

|      |      |      |     |     |        |        |        |
|------|------|------|-----|-----|--------|--------|--------|
| ATOM | 2290 | CG   | HIP | 145 | 23.454 | 29.560 | 21.905 |
| ATOM | 2291 | ND1  | HIP | 145 | 23.543 | 28.617 | 22.914 |
| ATOM | 2292 | HD1  | HIP | 145 | 24.250 | 28.609 | 23.642 |
| ATOM | 2293 | CE1  | HIP | 145 | 22.519 | 27.750 | 22.762 |
| ATOM | 2294 | HE1  | HIP | 145 | 22.302 | 26.908 | 23.416 |
| ATOM | 2295 | NE2  | HIP | 145 | 21.790 | 28.119 | 21.686 |
| ATOM | 2296 | HE2  | HIP | 145 | 20.939 | 27.665 | 21.346 |
| ATOM | 2297 | CD2  | HIP | 145 | 22.366 | 29.253 | 21.142 |
| ATOM | 2298 | HD2  | HIP | 145 | 21.989 | 29.836 | 20.304 |
| ATOM | 2299 | C    | HIP | 145 | 26.454 | 29.536 | 21.229 |
| ATOM | 2300 | O    | HIP | 145 | 26.466 | 28.378 | 21.647 |
| ATOM | 2301 | N    | VAL | 146 | 27.009 | 29.889 | 20.062 |
| ATOM | 2302 | H    | VAL | 146 | 26.901 | 30.843 | 19.737 |
| ATOM | 2303 | CA   | VAL | 146 | 27.862 | 28.959 | 19.289 |
| ATOM | 2304 | HA   | VAL | 146 | 27.403 | 27.971 | 19.336 |
| ATOM | 2305 | CB   | VAL | 146 | 28.027 | 29.319 | 17.794 |
| ATOM | 2306 | HB   | VAL | 146 | 28.962 | 28.868 | 17.462 |
| ATOM | 2307 | CG1  | VAL | 146 | 26.928 | 28.709 | 16.923 |
| ATOM | 2308 | 1HG1 | VAL | 146 | 26.021 | 29.312 | 16.967 |
| ATOM | 2309 | 2HG1 | VAL | 146 | 27.290 | 28.686 | 15.893 |
| ATOM | 2310 | 3HG1 | VAL | 146 | 26.711 | 27.687 | 17.229 |
| ATOM | 2311 | CG2  | VAL | 146 | 28.109 | 30.814 | 17.464 |
| ATOM | 2312 | 1HG2 | VAL | 146 | 27.311 | 31.374 | 17.946 |
| ATOM | 2313 | 2HG2 | VAL | 146 | 29.081 | 31.205 | 17.762 |
| ATOM | 2314 | 3HG2 | VAL | 146 | 28.000 | 30.948 | 16.389 |
| ATOM | 2315 | C    | VAL | 146 | 29.241 | 28.790 | 19.927 |
| ATOM | 2316 | O    | VAL | 146 | 29.722 | 27.664 | 20.045 |
| ATOM | 2317 | N    | TYR | 147 | 29.844 | 29.873 | 20.424 |
| ATOM | 2318 | H    | TYR | 147 | 29.436 | 30.785 | 20.246 |
| ATOM | 2319 | CA   | TYR | 147 | 31.136 | 29.843 | 21.118 |
| ATOM | 2320 | HA   | TYR | 147 | 31.910 | 29.517 | 20.418 |
| ATOM | 2321 | CB   | TYR | 147 | 31.441 | 31.280 | 21.552 |
| ATOM | 2322 | ZHB  | TYR | 147 | 31.348 | 31.934 | 20.684 |
| ATOM | 2323 | 3HB  | TYR | 147 | 30.710 | 31.602 | 22.290 |
| ATOM | 2324 | CG   | TYR | 147 | 32.813 | 31.481 | 22.127 |
| ATOM | 2325 | CD1  | TYR | 147 | 33.025 | 31.371 | 23.517 |
| ATOM | 2326 | HD1  | TYR | 147 | 32.208 | 31.131 | 24.178 |
| ATOM | 2327 | CE1  | TYR | 147 | 34.318 | 31.553 | 24.040 |
| ATOM | 2328 | HE1  | TYR | 147 | 34.517 | 31.460 | 25.099 |
| ATOM | 2329 | CZ   | TYR | 147 | 35.382 | 31.839 | 23.160 |
| ATOM | 2330 | OH   | TYR | 147 | 36.639 | 32.004 | 23.610 |
| ATOM | 2331 | HH   | TYR | 147 | 36.777 | 31.868 | 24.574 |
| ATOM | 2332 | CE2  | TYR | 147 | 35.160 | 31.981 | 21.778 |
| ATOM | 2333 | HE2  | TYR | 147 | 35.999 | 32.202 | 21.133 |
| ATOM | 2334 | CD2  | TYR | 147 | 33.872 | 31.795 | 21.258 |
| ATOM | 2335 | HD2  | TYR | 147 | 33.704 | 31.884 | 20.194 |
| ATOM | 2336 | C    | TYR | 147 | 31.133 | 28.858 | 22.305 |
| ATOM | 2337 | O    | TYR | 147 | 31.907 | 27.906 | 22.337 |
| ATOM | 2338 | N    | GLN | 148 | 30.142 | 28.969 | 23.201 |
| ATOM | 2339 | H    | GLN | 148 | 29.524 | 29.769 | 23.111 |
| ATOM | 2340 | CA   | GLN | 148 | 29.883 | 28.028 | 24.308 |
| ATOM | 2341 | HA   | GLN | 148 | 30.785 | 27.947 | 24.918 |
| ATOM | 2342 | CB   | GLN | 148 | 28.736 | 28.584 | 25.166 |
| ATOM | 2343 | ZHB  | GLN | 148 | 27.899 | 28.826 | 24.509 |
| ATOM | 2344 | 3HB  | GLN | 148 | 28.400 | 27.819 | 25.867 |
| ATOM | 2345 | CG   | GLN | 148 | 29.120 | 29.814 | 25.993 |
| ATOM | 2346 | ZHG  | GLN | 148 | 29.880 | 29.524 | 26.721 |
| ATOM | 2347 | 3HG  | GLN | 148 | 29.542 | 30.591 | 25.358 |
| ATOM | 2348 | CD   | GLN | 148 | 27.910 | 30.389 | 26.725 |
| ATOM | 2349 | OE1  | GLN | 148 | 26.773 | 30.343 | 26.274 |
| ATOM | 2350 | NE2  | GLN | 148 | 28.107 | 30.952 | 27.896 |
| ATOM | 2351 | 1HE2 | GLN | 148 | 27.290 | 31.272 | 28.383 |
| ATOM | 2352 | 2HE2 | GLN | 148 | 29.022 | 30.951 | 28.308 |
| ATOM | 2353 | C    | GLN | 148 | 29.518 | 26.594 | 23.865 |
| ATOM | 2354 | O    | GLN | 148 | 29.218 | 25.736 | 24.695 |
| ATOM | 2355 | N    | HIP | 149 | 29.479 | 26.316 | 22.561 |
| ATOM | 2356 | H    | HIP | 149 | 29.699 | 27.062 | 21.908 |
| ATOM | 2357 | CA   | HIP | 149 | 29.229 | 24.995 | 21.986 |
| ATOM | 2358 | HA   | HIP | 149 | 29.021 | 24.305 | 22.803 |
| ATOM | 2359 | CB   | HIP | 149 | 27.992 | 25.080 | 21.070 |
| ATOM | 2360 | ZHB  | HIP | 149 | 27.520 | 26.058 | 21.163 |
| ATOM | 2361 | 3HB  | HIP | 149 | 28.297 | 24.970 | 20.027 |
| ATOM | 2362 | CG   | HIP | 149 | 26.949 | 24.051 | 21.404 |
| ATOM | 2363 | ND1  | HIP | 149 | 26.510 | 23.732 | 22.676 |
| ATOM | 2364 | HD1  | HIP | 149 | 26.861 | 24.151 | 23.534 |
| ATOM | 2365 | CE1  | HIP | 149 | 25.618 | 22.726 | 22.562 |
| ATOM | 2366 | HE1  | HIP | 149 | 25.136 | 22.215 | 23.391 |
| ATOM | 2367 | NE2  | HIP | 149 | 25.470 | 22.424 | 21.251 |
| ATOM | 2368 | HE2  | HIP | 149 | 24.911 | 21.669 | 20.867 |
| ATOM | 2369 | CD2  | HIP | 149 | 26.291 | 23.256 | 20.510 |
| ATOM | 2370 | HD2  | HIP | 149 | 26.421 | 23.266 | 19.431 |
| ATOM | 2371 | C    | HIP | 149 | 30.468 | 24.384 | 21.318 |
| ATOM | 2372 | O    | HIP | 149 | 30.330 | 23.449 | 20.537 |
| ATOM | 2373 | N    | GLY | 150 | 31.659 | 24.910 | 21.619 |
| ATOM | 2374 | H    | GLY | 150 | 31.694 | 25.709 | 22.240 |
| ATOM | 2375 | CA   | GLY | 150 | 32.936 | 24.445 | 21.063 |
| ATOM | 2376 | ZHA  | GLY | 150 | 33.746 | 24.801 | 21.701 |
| ATOM | 2377 | 3HA  | GLY | 150 | 32.954 | 23.355 | 21.051 |
| ATOM | 2378 | C    | GLY | 150 | 33.220 | 24.938 | 19.642 |
| ATOM | 2379 | O    | GLY | 150 | 34.165 | 24.481 | 19.012 |
| ATOM | 2380 | N    | LEU | 151 | 32.409 | 25.866 | 19.125 |
| ATOM | 2381 | H    | LEU | 151 | 31.643 | 26.197 | 19.691 |
| ATOM | 2382 | CA   | LEU | 151 | 32.573 | 26.461 | 17.800 |
| ATOM | 2383 | HA   | LEU | 151 | 33.252 | 25.845 | 17.213 |
| ATOM | 2384 | CB   | LEU | 151 | 31.212 | 26.484 | 17.096 |
| ATOM | 2385 | ZHB  | LEU | 151 | 30.499 | 26.994 | 17.734 |
| ATOM | 2386 | 3HB  | LEU | 151 | 31.300 | 27.052 | 16.175 |
| ATOM | 2387 | CG   | LEU | 151 | 30.658 | 25.090 | 16.738 |
| ATOM | 2388 | HG   | LEU | 151 | 30.537 | 24.498 | 17.653 |
| ATOM | 2389 | CD1  | LEU | 151 | 29.298 | 25.222 | 16.028 |
| ATOM | 2390 | 1HD1 | LEU | 151 | 29.324 | 24.797 | 15.025 |
| ATOM | 2391 | 2HD1 | LEU | 151 | 28.550 | 24.679 | 16.601 |
| ATOM | 2392 | 3HD1 | LEU | 151 | 29.014 | 26.264 | 15.921 |
| ATOM | 2393 | CD2  | LEU | 151 | 31.562 | 24.322 | 15.763 |
| ATOM | 2394 | 1HD2 | LEU | 151 | 31.039 | 23.441 | 15.388 |

|      |      |      |     |     |        |        |        |
|------|------|------|-----|-----|--------|--------|--------|
| ATOM | 2395 | ZHD2 | LEU | 151 | 32.469 | 23.981 | 16.265 |
| ATOM | 2396 | 3HD2 | LEU | 151 | 31.820 | 24.973 | 14.922 |
| ATOM | 2397 | C    | LEU | 151 | 33.250 | 27.828 | 17.903 |
| ATOM | 2398 | O    | LEU | 151 | 32.729 | 28.849 | 17.455 |
| ATOM | 2399 | N    | THR | 152 | 34.425 | 27.851 | 18.524 |
| ATOM | 2400 | H    | THR | 152 | 34.818 | 26.982 | 18.870 |
| ATOM | 2401 | CA   | THR | 152 | 35.221 | 29.065 | 18.757 |
| ATOM | 2402 | HA   | THR | 152 | 34.588 | 29.820 | 19.222 |
| ATOM | 2403 | CB   | THR | 152 | 36.384 | 28.754 | 19.706 |
| ATOM | 2404 | HB   | THR | 152 | 37.097 | 29.579 | 19.682 |
| ATOM | 2405 | CG2  | THR | 152 | 35.893 | 28.570 | 21.145 |
| ATOM | 2406 | 1HG2 | THR | 152 | 36.222 | 29.425 | 21.731 |
| ATOM | 2407 | 2HG2 | THR | 152 | 34.805 | 28.495 | 21.201 |
| ATOM | 2408 | 3HG2 | THR | 152 | 36.326 | 27.671 | 21.588 |
| ATOM | 2409 | OG1  | THR | 152 | 37.030 | 27.576 | 19.288 |
| ATOM | 2410 | 1HG  | THR | 152 | 37.771 | 27.428 | 19.931 |
| ATOM | 2411 | C    | THR | 152 | 35.762 | 29.672 | 17.463 |
| ATOM | 2412 | O    | THR | 152 | 35.527 | 30.851 | 17.197 |
| ATOM | 2413 | N    | GLY | 153 | 36.338 | 28.849 | 16.577 |
| ATOM | 2414 | H    | GLY | 153 | 36.569 | 27.918 | 16.908 |
| ATOM | 2415 | CA   | GLY | 153 | 36.745 | 29.243 | 15.215 |
| ATOM | 2416 | ZHA  | GLY | 153 | 37.509 | 30.016 | 15.276 |
| ATOM | 2417 | 3HA  | GLY | 153 | 37.169 | 28.374 | 14.715 |
| ATOM | 2418 | C    | GLY | 153 | 35.603 | 29.770 | 14.332 |
| ATOM | 2419 | O    | GLY | 153 | 35.842 | 30.393 | 13.301 |
| ATOM | 2420 | N    | PHE | 154 | 34.350 | 29.563 | 14.742 |
| ATOM | 2421 | H    | PHE | 154 | 34.210 | 29.083 | 15.620 |
| ATOM | 2422 | CA   | PHE | 154 | 33.152 | 30.018 | 14.032 |
| ATOM | 2423 | HA   | PHE | 154 | 33.349 | 29.971 | 12.959 |
| ATOM | 2424 | CB   | PHE | 154 | 32.026 | 29.030 | 14.366 |
| ATOM | 2425 | ZHB  | PHE | 154 | 32.472 | 28.073 | 14.624 |
| ATOM | 2426 | 3HB  | PHE | 154 | 31.478 | 29.390 | 15.236 |
| ATOM | 2427 | CG   | PHE | 154 | 31.060 | 28.777 | 13.237 |
| ATOM | 2428 | CD1  | PHE | 154 | 29.965 | 29.634 | 13.048 |
| ATOM | 2429 | HD1  | PHE | 154 | 29.809 | 30.467 | 13.715 |
| ATOM | 2430 | CE1  | PHE | 154 | 29.079 | 29.412 | 11.985 |
| ATOM | 2431 | HE1  | PHE | 154 | 28.231 | 30.066 | 11.850 |
| ATOM | 2432 | CZ   | PHE | 154 | 29.275 | 28.324 | 11.116 |
| ATOM | 2433 | HZ   | PHE | 154 | 28.590 | 28.154 | 10.296 |
| ATOM | 2434 | CE2  | PHE | 154 | 30.351 | 27.445 | 11.324 |
| ATOM | 2435 | HE2  | PHE | 154 | 30.495 | 26.601 | 10.663 |
| ATOM | 2436 | CD2  | PHE | 154 | 31.246 | 27.673 | 12.384 |
| ATOM | 2437 | HD2  | PHE | 154 | 32.078 | 26.999 | 12.535 |
| ATOM | 2438 | C    | PHE | 154 | 32.782 | 31.482 | 14.355 |
| ATOM | 2439 | O    | PHE | 154 | 32.002 | 32.101 | 13.624 |
| ATOM | 2440 | N    | LEU | 155 | 33.367 | 32.075 | 15.404 |
| ATOM | 2441 | H    | LEU | 155 | 34.018 | 31.536 | 15.961 |
| ATOM | 2442 | CA   | LEU | 155 | 33.057 | 33.430 | 15.854 |
| ATOM | 2443 | HA   | LEU | 155 | 31.999 | 33.476 | 16.097 |
| ATOM | 2444 | CB   | LEU | 155 | 33.882 | 33.633 | 17.137 |
| ATOM | 2445 | ZHB  | LEU | 155 | 33.707 | 32.760 | 17.781 |
| ATOM | 2446 | 3HB  | LEU | 155 | 34.954 | 33.632 | 16.878 |
| ATOM | 2447 | CG   | LEU | 155 | 33.547 | 34.884 | 17.962 |
| ATOM | 2448 | HG   | LEU | 155 | 33.759 | 35.765 | 17.350 |
| ATOM | 2449 | CD1  | LEU | 155 | 32.101 | 34.905 | 18.405 |
| ATOM | 2450 | 1HD1 | LEU | 155 | 31.968 | 35.791 | 19.028 |
| ATOM | 2451 | ZHD1 | LEU | 155 | 31.464 | 35.004 | 17.541 |
| ATOM | 2452 | 3HD1 | LEU | 155 | 31.875 | 34.029 | 18.959 |
| ATOM | 2453 | CD2  | LEU | 155 | 34.425 | 34.934 | 19.216 |
| ATOM | 2454 | 1HD2 | LEU | 155 | 35.334 | 35.506 | 19.024 |
| ATOM | 2455 | ZHD2 | LEU | 155 | 34.711 | 33.917 | 19.523 |
| ATOM | 2456 | 3HD2 | LEU | 155 | 33.899 | 35.399 | 20.045 |
| ATOM | 2457 | C    | LEU | 155 | 33.332 | 34.503 | 14.785 |
| ATOM | 2458 | O    | LEU | 155 | 32.593 | 35.486 | 14.658 |
| ATOM | 2459 | N    | GLY | 156 | 34.344 | 34.271 | 13.946 |
| ATOM | 2460 | H    | GLY | 156 | 34.894 | 33.436 | 14.095 |
| ATOM | 2461 | CA   | GLY | 156 | 34.636 | 35.097 | 12.769 |
| ATOM | 2462 | ZHA  | GLY | 156 | 34.708 | 36.144 | 13.077 |
| ATOM | 2463 | 3HA  | GLY | 156 | 35.601 | 34.787 | 12.361 |
| ATOM | 2464 | C    | GLY | 156 | 33.594 | 34.989 | 11.647 |
| ATOM | 2465 | O    | GLY | 156 | 33.349 | 35.981 | 10.967 |
| ATOM | 2466 | N    | GLN | 157 | 32.940 | 33.835 | 11.481 |
| ATOM | 2467 | H    | GLN | 157 | 33.088 | 33.081 | 12.140 |
| ATOM | 2468 | CA   | GLN | 157 | 31.888 | 33.663 | 10.474 |
| ATOM | 2469 | HA   | GLN | 157 | 32.184 | 34.190 | 9.566  |
| ATOM | 2470 | CB   | GLN | 157 | 31.697 | 32.191 | 10.094 |
| ATOM | 2471 | ZHB  | GLN | 157 | 31.392 | 31.599 | 10.959 |
| ATOM | 2472 | 3HB  | GLN | 157 | 30.891 | 32.165 | 9.359  |
| ATOM | 2473 | CG   | GLN | 157 | 32.963 | 31.577 | 9.472  |
| ATOM | 2474 | ZHG  | GLN | 157 | 33.513 | 32.346 | 8.930  |
| ATOM | 2475 | 3HG  | GLN | 157 | 33.606 | 31.195 | 10.265 |
| ATOM | 2476 | CD   | GLN | 157 | 32.661 | 30.445 | 8.492  |
| ATOM | 2477 | OE1  | GLN | 157 | 31.539 | 30.020 | 8.283  |
| ATOM | 2478 | NE2  | GLN | 157 | 33.666 | 29.928 | 7.823  |
| ATOM | 2479 | 1HE2 | GLN | 157 | 33.421 | 29.207 | 7.164  |
| ATOM | 2480 | ZHE2 | GLN | 157 | 34.606 | 30.236 | 7.974  |
| ATOM | 2481 | C    | GLN | 157 | 30.567 | 34.295 | 10.920 |
| ATOM | 2482 | O    | GLN | 157 | 29.971 | 35.043 | 10.153 |
| ATOM | 2483 | N    | VAL | 158 | 30.181 | 34.130 | 12.190 |
| ATOM | 2484 | H    | VAL | 158 | 30.686 | 33.458 | 12.758 |
| ATOM | 2485 | CA   | VAL | 158 | 29.057 | 34.880 | 12.781 |
| ATOM | 2486 | HA   | VAL | 158 | 28.151 | 34.658 | 12.216 |
| ATOM | 2487 | CB   | VAL | 158 | 28.848 | 34.444 | 14.241 |
| ATOM | 2488 | HB   | VAL | 158 | 29.809 | 34.514 | 14.757 |
| ATOM | 2489 | CG1  | VAL | 158 | 27.831 | 35.300 | 15.003 |
| ATOM | 2490 | 1HG1 | VAL | 158 | 27.751 | 34.927 | 16.019 |
| ATOM | 2491 | ZHG1 | VAL | 158 | 28.146 | 36.343 | 15.041 |
| ATOM | 2492 | 3HG1 | VAL | 158 | 26.857 | 35.230 | 14.518 |
| ATOM | 2493 | CG2  | VAL | 158 | 28.361 | 32.988 | 14.301 |
| ATOM | 2494 | 1HG2 | VAL | 158 | 28.207 | 32.584 | 13.299 |
| ATOM | 2495 | ZHG2 | VAL | 158 | 29.100 | 32.382 | 14.821 |
| ATOM | 2496 | 3HG2 | VAL | 158 | 27.409 | 32.910 | 14.828 |
| ATOM | 2497 | C    | VAL | 158 | 29.278 | 36.391 | 12.679 |
| ATOM | 2498 | O    | VAL | 158 | 28.361 | 37.119 | 12.313 |
| ATOM | 2499 | N    | THR | 159 | 30.499 | 36.871 | 12.938 |



|      |      |      |     |     |        |        |        |
|------|------|------|-----|-----|--------|--------|--------|
| ATOM | 2500 | H    | THR | 159 | 31.199 | 36.237 | 13.303 |
| ATOM | 2501 | CA   | THR | 159 | 30.852 | 38.289 | 12.745 |
| ATOM | 2502 | HA   | THR | 159 | 30.187 | 38.906 | 13.352 |
| ATOM | 2503 | CB   | THR | 159 | 32.299 | 38.553 | 13.188 |
| ATOM | 2504 | HB   | THR | 159 | 32.971 | 37.909 | 12.623 |
| ATOM | 2505 | CG2  | THR | 159 | 32.732 | 40.001 | 12.970 |
| ATOM | 2506 | 1HG2 | THR | 159 | 33.692 | 40.164 | 13.453 |
| ATOM | 2507 | 2HG2 | THR | 159 | 32.849 | 40.201 | 11.906 |
| ATOM | 2508 | 3HG2 | THR | 159 | 31.992 | 40.687 | 13.380 |
| ATOM | 2509 | OG1  | THR | 159 | 32.455 | 38.259 | 14.558 |
| ATOM | 2510 | 1HG  | THR | 159 | 32.449 | 37.294 | 14.665 |
| ATOM | 2511 | C    | THR | 159 | 30.668 | 38.726 | 11.287 |
| ATOM | 2512 | O    | THR | 159 | 30.008 | 39.730 | 11.025 |
| ATOM | 2513 | N    | ARG | 160 | 31.200 | 37.951 | 10.330 |
| ATOM | 2514 | H    | ARG | 160 | 31.748 | 37.147 | 10.617 |
| ATOM | 2515 | CA   | ARG | 160 | 31.047 | 38.200 | 8.888  |
| ATOM | 2516 | HA   | ARG | 160 | 31.485 | 39.171 | 8.654  |
| ATOM | 2517 | CB   | ARG | 160 | 31.791 | 37.083 | 8.135  |
| ATOM | 2518 | ZHB  | ARG | 160 | 32.835 | 37.087 | 8.452  |
| ATOM | 2519 | 3HB  | ARG | 160 | 31.376 | 36.123 | 8.429  |
| ATOM | 2520 | CG   | ARG | 160 | 31.714 | 37.152 | 6.599  |
| ATOM | 2521 | ZHG  | ARG | 160 | 32.261 | 36.299 | 6.196  |
| ATOM | 2522 | 3HG  | ARG | 160 | 30.676 | 37.062 | 6.280  |
| ATOM | 2523 | CD   | ARG | 160 | 32.303 | 38.430 | 5.992  |
| ATOM | 2524 | ZHD  | ARG | 160 | 32.293 | 38.342 | 4.905  |
| ATOM | 2525 | 3HD  | ARG | 160 | 31.679 | 39.278 | 6.282  |
| ATOM | 2526 | NE   | ARG | 160 | 33.689 | 38.627 | 6.435  |
| ATOM | 2527 | HE   | ARG | 160 | 34.202 | 37.805 | 6.705  |
| ATOM | 2528 | CZ   | ARG | 160 | 34.273 | 39.785 | 6.671  |
| ATOM | 2529 | NH1  | ARG | 160 | 35.399 | 39.802 | 7.304  |
| ATOM | 2530 | 1HH1 | ARG | 160 | 35.806 | 38.978 | 7.690  |
| ATOM | 2531 | 2HH1 | ARG | 160 | 35.687 | 40.711 | 7.696  |
| ATOM | 2532 | NH2  | ARG | 160 | 33.791 | 40.934 | 6.300  |
| ATOM | 2533 | 1HH2 | ARG | 160 | 32.964 | 40.987 | 5.738  |
| ATOM | 2534 | 2HH2 | ARG | 160 | 34.293 | 41.762 | 6.594  |
| ATOM | 2535 | C    | ARG | 160 | 29.579 | 38.275 | 8.464  |
| ATOM | 2536 | O    | ARG | 160 | 29.222 | 39.151 | 7.684  |
| ATOM | 2537 | N    | PHE | 161 | 28.751 | 37.371 | 8.979  |
| ATOM | 2538 | H    | PHE | 161 | 29.151 | 36.657 | 9.578  |
| ATOM | 2539 | CA   | PHE | 161 | 27.324 | 37.269 | 8.678  |
| ATOM | 2540 | HA   | PHE | 161 | 27.185 | 37.247 | 7.597  |
| ATOM | 2541 | CB   | PHE | 161 | 26.833 | 35.936 | 9.259  |
| ATOM | 2542 | ZHB  | PHE | 161 | 27.348 | 35.119 | 8.750  |
| ATOM | 2543 | 3HB  | PHE | 161 | 27.104 | 35.882 | 10.313 |
| ATOM | 2544 | CG   | PHE | 161 | 25.343 | 35.716 | 9.138  |
| ATOM | 2545 | CD1  | PHE | 161 | 24.510 | 35.969 | 10.243 |
| ATOM | 2546 | HD1  | PHE | 161 | 24.933 | 36.315 | 11.175 |
| ATOM | 2547 | CE1  | PHE | 161 | 23.127 | 35.755 | 10.139 |
| ATOM | 2548 | HE1  | PHE | 161 | 22.495 | 35.923 | 10.995 |
| ATOM | 2549 | CZ   | PHE | 161 | 22.575 | 35.306 | 8.927  |
| ATOM | 2550 | HZ   | PHE | 161 | 21.513 | 35.142 | 8.848  |
| ATOM | 2551 | CE2  | PHE | 161 | 23.407 | 35.049 | 7.824  |
| ATOM | 2552 | HE2  | PHE | 161 | 22.983 | 34.683 | 6.900  |
| ATOM | 2553 | CD2  | PHE | 161 | 24.793 | 35.249 | 7.930  |
| ATOM | 2554 | HD2  | PHE | 161 | 25.435 | 35.037 | 7.087  |
| ATOM | 2555 | C    | PHE | 161 | 26.519 | 38.469 | 9.205  |
| ATOM | 2556 | O    | PHE | 161 | 25.720 | 39.041 | 8.464  |
| ATOM | 2557 | N    | VAL | 162 | 26.769 | 38.915 | 10.442 |
| ATOM | 2558 | H    | VAL | 162 | 27.424 | 38.401 | 11.025 |
| ATOM | 2559 | CA   | VAL | 162 | 26.094 | 40.099 | 11.011 |
| ATOM | 2560 | HA   | VAL | 162 | 25.015 | 39.955 | 10.946 |
| ATOM | 2561 | CB   | VAL | 162 | 26.480 | 40.282 | 12.494 |
| ATOM | 2562 | HB   | VAL | 162 | 27.557 | 40.455 | 12.541 |
| ATOM | 2563 | CG1  | VAL | 162 | 25.763 | 41.477 | 13.130 |
| ATOM | 2564 | 1HG1 | VAL | 162 | 26.014 | 42.402 | 12.612 |
| ATOM | 2565 | 2HG1 | VAL | 162 | 24.685 | 41.320 | 13.081 |
| ATOM | 2566 | 3HG1 | VAL | 162 | 26.073 | 41.567 | 14.170 |
| ATOM | 2567 | CG2  | VAL | 162 | 26.140 | 39.060 | 13.368 |
| ATOM | 2568 | 1HG2 | VAL | 162 | 25.903 | 38.188 | 12.761 |
| ATOM | 2569 | 2HG2 | VAL | 162 | 26.999 | 38.828 | 13.998 |
| ATOM | 2570 | 3HG2 | VAL | 162 | 25.282 | 39.254 | 14.011 |
| ATOM | 2571 | C    | VAL | 162 | 26.445 | 41.361 | 10.210 |
| ATOM | 2572 | O    | VAL | 162 | 25.572 | 42.177 | 9.916  |
| ATOM | 2573 | N    | VAL | 163 | 27.714 | 41.510 | 9.818  |
| ATOM | 2574 | H    | VAL | 163 | 28.394 | 40.823 | 10.128 |
| ATOM | 2575 | CA   | VAL | 163 | 28.200 | 42.656 | 9.029  |
| ATOM | 2576 | HA   | VAL | 163 | 27.862 | 43.577 | 9.503  |
| ATOM | 2577 | CB   | VAL | 163 | 29.741 | 42.662 | 9.015  |
| ATOM | 2578 | HB   | VAL | 163 | 30.088 | 41.681 | 8.689  |
| ATOM | 2579 | CG1  | VAL | 163 | 30.329 | 43.712 | 8.065  |
| ATOM | 2580 | 1HG1 | VAL | 163 | 29.826 | 44.671 | 8.206  |
| ATOM | 2581 | 2HG1 | VAL | 163 | 31.393 | 43.843 | 8.265  |
| ATOM | 2582 | 3HG1 | VAL | 163 | 30.208 | 43.390 | 7.032  |
| ATOM | 2583 | CG2  | VAL | 163 | 30.300 | 42.912 | 10.424 |
| ATOM | 2584 | 1HG2 | VAL | 163 | 31.297 | 42.486 | 10.482 |
| ATOM | 2585 | 2HG2 | VAL | 163 | 29.696 | 42.431 | 11.192 |
| ATOM | 2586 | 3HG2 | VAL | 163 | 30.349 | 43.980 | 10.630 |
| ATOM | 2587 | C    | VAL | 163 | 27.613 | 42.651 | 7.614  |
| ATOM | 2588 | O    | VAL | 163 | 27.116 | 43.677 | 7.153  |
| ATOM | 2589 | N    | ASP | 164 | 27.574 | 41.491 | 6.950  |
| ATOM | 2590 | H    | ASP | 164 | 28.005 | 40.670 | 7.362  |
| ATOM | 2591 | CA   | ASP | 164 | 26.918 | 41.341 | 5.647  |
| ATOM | 2592 | HA   | ASP | 164 | 27.387 | 42.026 | 4.939  |
| ATOM | 2593 | CB   | ASP | 164 | 27.128 | 39.911 | 5.136  |
| ATOM | 2594 | ZHB  | ASP | 164 | 28.195 | 39.684 | 5.130  |
| ATOM | 2595 | 3HB  | ASP | 164 | 26.625 | 39.202 | 5.796  |
| ATOM | 2596 | CG   | ASP | 164 | 26.578 | 39.789 | 3.718  |
| ATOM | 2597 | OD1  | ASP | 164 | 25.347 | 39.622 | 3.560  |
| ATOM | 2598 | OD2  | ASP | 164 | 27.351 | 40.011 | 2.764  |
| ATOM | 2599 | C    | ASP | 164 | 25.419 | 41.691 | 5.710  |
| ATOM | 2600 | O    | ASP | 164 | 24.907 | 42.399 | 4.836  |
| ATOM | 2601 | N    | PHE | 165 | 24.725 | 41.278 | 6.778  |
| ATOM | 2602 | H    | PHE | 165 | 25.178 | 40.653 | 7.440  |
| ATOM | 2603 | CA   | PHE | 165 | 23.327 | 41.640 | 7.003  |
| ATOM | 2604 | HA   | PHE | 165 | 22.760 | 41.326 | 6.126  |

|      |      |      |     |     |        |        |        |
|------|------|------|-----|-----|--------|--------|--------|
| ATOM | 2605 | CB   | PHE | 165 | 22.771 | 40.885 | 8.221  |
| ATOM | 2606 | ZHB  | PHE | 165 | 22.948 | 39.817 | 8.085  |
| ATOM | 2607 | 3HB  | PHE | 165 | 23.311 | 41.192 | 9.116  |
| ATOM | 2608 | CG   | PHE | 165 | 21.286 | 41.111 | 8.446  |
| ATOM | 2609 | CD1  | PHE | 165 | 20.344 | 40.202 | 7.926  |
| ATOM | 2610 | HD1  | PHE | 165 | 20.680 | 39.317 | 7.402  |
| ATOM | 2611 | CE1  | PHE | 165 | 18.967 | 40.432 | 8.103  |
| ATOM | 2612 | HE1  | PHE | 165 | 18.242 | 39.725 | 7.724  |
| ATOM | 2613 | CZ   | PHE | 165 | 18.530 | 41.578 | 8.790  |
| ATOM | 2614 | HZ   | PHE | 165 | 17.473 | 41.760 | 8.927  |
| ATOM | 2615 | CE2  | PHE | 165 | 19.466 | 42.477 | 9.329  |
| ATOM | 2616 | HE2  | PHE | 165 | 19.124 | 43.340 | 9.885  |
| ATOM | 2617 | CD2  | PHE | 165 | 20.842 | 42.241 | 9.163  |
| ATOM | 2618 | HD2  | PHE | 165 | 21.558 | 42.931 | 9.587  |
| ATOM | 2619 | C    | PHE | 165 | 23.152 | 43.160 | 7.145  |
| ATOM | 2620 | O    | PHE | 165 | 22.280 | 43.732 | 6.486  |
| ATOM | 2621 | N    | MET | 166 | 23.995 | 43.837 | 7.938  |
| ATOM | 2622 | H    | MET | 166 | 24.711 | 43.317 | 8.440  |
| ATOM | 2623 | CA   | MET | 166 | 23.937 | 45.300 | 8.093  |
| ATOM | 2624 | HA   | MET | 166 | 22.934 | 45.568 | 8.425  |
| ATOM | 2625 | CB   | MET | 166 | 24.939 | 45.799 | 9.145  |
| ATOM | 2626 | ZHB  | MET | 166 | 25.941 | 45.427 | 8.925  |
| ATOM | 2627 | 3HB  | MET | 166 | 24.967 | 46.888 | 9.089  |
| ATOM | 2628 | CG   | MET | 166 | 24.547 | 45.412 | 10.574 |
| ATOM | 2629 | ZHG  | MET | 166 | 23.461 | 45.407 | 10.666 |
| ATOM | 2630 | 3HG  | MET | 166 | 24.915 | 44.409 | 10.781 |
| ATOM | 2631 | SD   | MET | 166 | 25.212 | 46.557 | 11.811 |
| ATOM | 2632 | CE   | MET | 166 | 24.920 | 45.622 | 13.332 |
| ATOM | 2633 | 1HE  | MET | 166 | 23.850 | 45.534 | 13.514 |
| ATOM | 2634 | 2HE  | MET | 166 | 25.360 | 44.629 | 13.242 |
| ATOM | 2635 | 3HE  | MET | 166 | 25.388 | 46.143 | 14.168 |
| ATOM | 2636 | C    | MET | 166 | 24.178 | 46.046 | 6.775  |
| ATOM | 2637 | O    | MET | 166 | 23.473 | 47.020 | 6.495  |
| ATOM | 2638 | N    | LEU | 167 | 25.114 | 45.574 | 5.946  |
| ATOM | 2639 | H    | LEU | 167 | 25.693 | 44.801 | 6.268  |
| ATOM | 2640 | CA   | LEU | 167 | 25.357 | 46.100 | 4.601  |
| ATOM | 2641 | HA   | LEU | 167 | 25.526 | 47.175 | 4.673  |
| ATOM | 2642 | CB   | LEU | 167 | 26.644 | 45.437 | 4.062  |
| ATOM | 2643 | ZHB  | LEU | 167 | 27.452 | 45.649 | 4.764  |
| ATOM | 2644 | 3HB  | LEU | 167 | 26.505 | 44.356 | 4.047  |
| ATOM | 2645 | CG   | LEU | 167 | 27.101 | 45.876 | 2.658  |
| ATOM | 2646 | HG   | LEU | 167 | 26.344 | 45.590 | 1.928  |
| ATOM | 2647 | CD1  | LEU | 167 | 27.346 | 47.380 | 2.561  |
| ATOM | 2648 | 1HD1 | LEU | 167 | 26.406 | 47.924 | 2.649  |
| ATOM | 2649 | 2HD1 | LEU | 167 | 28.033 | 47.705 | 3.342  |
| ATOM | 2650 | 3HD1 | LEU | 167 | 27.782 | 47.621 | 1.591  |
| ATOM | 2651 | CD2  | LEU | 167 | 28.407 | 45.160 | 2.307  |
| ATOM | 2652 | 1HD2 | LEU | 167 | 28.711 | 45.422 | 1.293  |
| ATOM | 2653 | 2HD2 | LEU | 167 | 29.197 | 45.467 | 2.994  |
| ATOM | 2654 | 3HD2 | LEU | 167 | 28.275 | 44.080 | 2.368  |
| ATOM | 2655 | C    | LEU | 167 | 24.122 | 45.886 | 3.704  |
| ATOM | 2656 | O    | LEU | 167 | 23.513 | 46.842 | 3.225  |
| ATOM | 2657 | N    | HIP | 168 | 23.660 | 44.640 | 3.558  |
| ATOM | 2658 | H    | HIP | 168 | 24.166 | 43.894 | 4.032  |
| ATOM | 2659 | CA   | HIP | 168 | 22.556 | 44.275 | 2.653  |
| ATOM | 2660 | HA   | HIP | 168 | 22.670 | 44.879 | 1.752  |
| ATOM | 2661 | CB   | HIP | 168 | 22.694 | 42.800 | 2.241  |
| ATOM | 2662 | ZHB  | HIP | 168 | 22.698 | 42.174 | 3.136  |
| ATOM | 2663 | 3HB  | HIP | 168 | 21.837 | 42.511 | 1.631  |
| ATOM | 2664 | CG   | HIP | 168 | 23.942 | 42.528 | 1.436  |
| ATOM | 2665 | ND1  | HIP | 168 | 24.927 | 41.611 | 1.743  |
| ATOM | 2666 | HD1  | HIP | 168 | 24.952 | 40.961 | 2.545  |
| ATOM | 2667 | CE1  | HIP | 168 | 25.884 | 41.689 | 0.802  |
| ATOM | 2668 | HE1  | HIP | 168 | 26.792 | 41.089 | 0.804  |
| ATOM | 2669 | NE2  | HIP | 168 | 25.533 | 42.626 | -0.103 |
| ATOM | 2670 | HE2  | HIP | 168 | 26.083 | 42.905 | -0.909 |
| ATOM | 2671 | CD2  | HIP | 168 | 24.312 | 43.158 | 0.277  |
| ATOM | 2672 | HD2  | HIP | 168 | 23.758 | 43.939 | -0.233 |
| ATOM | 2673 | C    | HIP | 168 | 21.142 | 44.619 | 3.156  |
| ATOM | 2674 | O    | HIP | 168 | 20.170 | 44.317 | 2.466  |
| ATOM | 2675 | N    | HIP | 169 | 20.995 | 45.251 | 4.326  |
| ATOM | 2676 | H    | HIP | 169 | 21.823 | 45.353 | 4.901  |
| ATOM | 2677 | CA   | HIP | 169 | 19.719 | 45.804 | 4.826  |
| ATOM | 2678 | HA   | HIP | 169 | 18.998 | 45.767 | 4.009  |
| ATOM | 2679 | CB   | HIP | 169 | 19.147 | 44.931 | 5.964  |
| ATOM | 2680 | ZHB  | HIP | 169 | 19.909 | 44.762 | 6.727  |
| ATOM | 2681 | 3HB  | HIP | 169 | 18.314 | 45.446 | 6.445  |
| ATOM | 2682 | CG   | HIP | 169 | 18.622 | 43.615 | 5.459  |
| ATOM | 2683 | ND1  | HIP | 169 | 17.383 | 43.408 | 4.882  |
| ATOM | 2684 | HD1  | HIP | 169 | 16.672 | 44.121 | 4.751  |
| ATOM | 2685 | CE1  | HIP | 169 | 17.319 | 42.118 | 4.493  |
| ATOM | 2686 | HE1  | HIP | 169 | 16.480 | 41.661 | 3.975  |
| ATOM | 2687 | NE2  | HIP | 169 | 18.481 | 41.509 | 4.816  |
| ATOM | 2688 | HE2  | HIP | 169 | 18.732 | 40.549 | 4.612  |
| ATOM | 2689 | CD2  | HIP | 169 | 19.309 | 42.437 | 5.424  |
| ATOM | 2690 | HD2  | HIP | 169 | 20.318 | 42.287 | 5.793  |
| ATOM | 2691 | C    | HIP | 169 | 19.781 | 47.305 | 5.156  |
| ATOM | 2692 | O    | HIP | 169 | 19.045 | 47.764 | 6.021  |
| ATOM | 2693 | N    | CYS | 170 | 20.628 | 48.065 | 4.457  |
| ATOM | 2694 | H    | CYS | 170 | 21.215 | 47.612 | 3.772  |
| ATOM | 2695 | CA   | CYS | 170 | 20.720 | 49.532 | 4.546  |
| ATOM | 2696 | HA   | CYS | 170 | 21.498 | 49.837 | 3.852  |
| ATOM | 2697 | CB   | CYS | 170 | 19.415 | 50.179 | 4.045  |
| ATOM | 2698 | ZHB  | CYS | 170 | 18.585 | 49.899 | 4.698  |
| ATOM | 2699 | 3HB  | CYS | 170 | 19.511 | 51.265 | 4.073  |
| ATOM | 2700 | SG   | CYS | 170 | 19.052 | 49.662 | 2.346  |
| ATOM | 2701 | HG   | CYS | 170 | 17.848 | 50.243 | 2.300  |
| ATOM | 2702 | C    | CYS | 170 | 21.154 | 50.099 | 5.912  |
| ATOM | 2703 | O    | CYS | 170 | 21.138 | 51.312 | 6.099  |
| ATOM | 2704 | N    | ILE | 171 | 21.586 | 49.264 | 6.860  |
| ATOM | 2705 | H    | ILE | 171 | 21.664 | 48.279 | 6.642  |
| ATOM | 2706 | CA   | ILE | 171 | 21.945 | 49.701 | 8.220  |
| ATOM | 2707 | HA   | ILE | 171 | 21.201 | 50.437 | 8.544  |
| ATOM | 2708 | CB   | ILE | 171 | 21.896 | 48.525 | 9.237  |
| ATOM | 2709 | HB   | ILE | 171 | 22.691 | 47.825 | 8.972  |

|      |      |      |     |     |        |        |        |
|------|------|------|-----|-----|--------|--------|--------|
| ATOM | 2710 | CG2  | ILE | 171 | 22.208 | 49.072 | 10.646 |
| ATOM | 2711 | 1HG2 | ILE | 171 | 23.286 | 49.228 | 10.757 |
| ATOM | 2712 | 2HG2 | ILE | 171 | 21.705 | 50.031 | 10.820 |
| ATOM | 2713 | 3HG2 | ILE | 171 | 21.902 | 48.368 | 11.427 |
| ATOM | 2714 | CG1  | ILE | 171 | 20.544 | 47.788 | 9.130  |
| ATOM | 2715 | 2HG1 | ILE | 171 | 19.757 | 48.503 | 9.282  |
| ATOM | 2716 | 3HG1 | ILE | 171 | 20.400 | 47.404 | 8.126  |
| ATOM | 2717 | CD1  | ILE | 171 | 20.339 | 46.631 | 10.094 |
| ATOM | 2718 | 1HD1 | ILE | 171 | 19.902 | 45.762 | 9.597  |
| ATOM | 2719 | 2HD1 | ILE | 171 | 21.286 | 46.356 | 10.566 |
| ATOM | 2720 | 3HD1 | ILE | 171 | 19.647 | 46.983 | 10.876 |
| ATOM | 2721 | C    | ILE | 171 | 23.301 | 50.420 | 8.184  |
| ATOM | 2722 | O    | ILE | 171 | 23.421 | 51.517 | 8.725  |
| ATOM | 2723 | N    | ALA | 172 | 24.273 | 49.873 | 7.448  |
| ATOM | 2724 | H    | ALA | 172 | 24.107 | 48.963 | 7.030  |
| ATOM | 2725 | CA   | ALA | 172 | 25.541 | 50.551 | 7.201  |
| ATOM | 2726 | HA   | ALA | 172 | 25.997 | 50.782 | 8.163  |
| ATOM | 2727 | CB   | ALA | 172 | 26.473 | 49.582 | 6.464  |
| ATOM | 2728 | 1HB  | ALA | 172 | 27.483 | 49.994 | 6.442  |
| ATOM | 2729 | 2HB  | ALA | 172 | 26.509 | 48.621 | 6.981  |
| ATOM | 2730 | 3HB  | ALA | 172 | 26.134 | 49.424 | 5.439  |
| ATOM | 2731 | C    | ALA | 172 | 25.353 | 51.892 | 6.452  |
| ATOM | 2732 | O    | ALA | 172 | 26.038 | 52.865 | 6.756  |
| ATOM | 2733 | N    | ARG | 173 | 24.359 | 51.994 | 5.549  |
| ATOM | 2734 | H    | ARG | 173 | 23.831 | 51.161 | 5.344  |
| ATOM | 2735 | CA   | ARG | 173 | 23.961 | 53.255 | 4.881  |
| ATOM | 2736 | HA   | ARG | 173 | 24.852 | 53.706 | 4.437  |
| ATOM | 2737 | CB   | ARG | 173 | 22.949 | 52.961 | 3.758  |
| ATOM | 2738 | 2HB  | ARG | 173 | 23.344 | 52.147 | 3.149  |
| ATOM | 2739 | 3HB  | ARG | 173 | 22.006 | 52.630 | 4.189  |
| ATOM | 2740 | CG   | ARG | 173 | 22.661 | 54.184 | 2.863  |
| ATOM | 2741 | 2HG  | ARG | 173 | 22.234 | 54.988 | 3.463  |
| ATOM | 2742 | 3HG  | ARG | 173 | 23.596 | 54.536 | 2.429  |
| ATOM | 2743 | CD   | ARG | 173 | 21.672 | 53.854 | 1.730  |
| ATOM | 2744 | 2HD  | ARG | 173 | 20.739 | 53.480 | 2.154  |
| ATOM | 2745 | 3HD  | ARG | 173 | 21.477 | 54.760 | 1.153  |
| ATOM | 2746 | NE   | ARG | 173 | 22.264 | 52.840 | 0.848  |
| ATOM | 2747 | HE   | ARG | 173 | 23.244 | 52.626 | 1.030  |
| ATOM | 2748 | CZ   | ARG | 173 | 21.793 | 52.178 | -0.178 |
| ATOM | 2749 | NH1  | ARG | 173 | 20.608 | 52.382 | -0.675 |
| ATOM | 2750 | 1HH1 | ARG | 173 | 20.050 | 53.116 | -0.284 |
| ATOM | 2751 | 2HH1 | ARG | 173 | 20.321 | 51.870 | -1.481 |
| ATOM | 2752 | NH2  | ARG | 173 | 22.556 | 51.272 | -0.722 |
| ATOM | 2753 | 1HH2 | ARG | 173 | 23.486 | 51.103 | -0.301 |
| ATOM | 2754 | 2HH2 | ARG | 173 | 22.301 | 50.760 | -1.536 |
| ATOM | 2755 | C    | ARG | 173 | 23.401 | 54.284 | 5.864  |
| ATOM | 2756 | O    | ARG | 173 | 23.786 | 55.447 | 5.808  |
| ATOM | 2757 | N    | TRP | 174 | 22.525 | 53.858 | 6.773  |
| ATOM | 2758 | H    | TRP | 174 | 22.231 | 52.889 | 6.735  |
| ATOM | 2759 | CA   | TRP | 174 | 21.931 | 54.722 | 7.798  |
| ATOM | 2760 | HA   | TRP | 174 | 21.487 | 55.593 | 7.311  |
| ATOM | 2761 | CB   | TRP | 174 | 20.813 | 53.942 | 8.503  |
| ATOM | 2762 | 2HB  | TRP | 174 | 20.137 | 53.538 | 7.748  |
| ATOM | 2763 | 3HB  | TRP | 174 | 21.251 | 53.096 | 9.034  |
| ATOM | 2764 | CG   | TRP | 174 | 19.997 | 54.737 | 9.475  |
| ATOM | 2765 | CD1  | TRP | 174 | 18.940 | 55.518 | 9.158  |
| ATOM | 2766 | HD1  | TRP | 174 | 18.556 | 55.658 | 8.153  |
| ATOM | 2767 | NE1  | TRP | 174 | 18.438 | 56.109 | 10.302 |
| ATOM | 2768 | HE1  | TRP | 174 | 17.629 | 56.713 | 10.300 |
| ATOM | 2769 | CE2  | TRP | 174 | 19.172 | 55.759 | 11.416 |
| ATOM | 2770 | CZ2  | TRP | 174 | 19.086 | 56.116 | 12.770 |
| ATOM | 2771 | HZ2  | TRP | 174 | 18.316 | 56.792 | 13.106 |
| ATOM | 2772 | CH2  | TRP | 174 | 20.029 | 55.591 | 13.671 |
| ATOM | 2773 | HH2  | TRP | 174 | 20.000 | 55.869 | 14.714 |
| ATOM | 2774 | CZ3  | TRP | 174 | 21.024 | 54.711 | 13.211 |
| ATOM | 2775 | HZ3  | TRP | 174 | 21.755 | 54.313 | 13.899 |
| ATOM | 2776 | CE3  | TRP | 174 | 21.091 | 54.351 | 11.853 |
| ATOM | 2777 | HE3  | TRP | 174 | 21.865 | 53.678 | 11.511 |
| ATOM | 2778 | CD2  | TRP | 174 | 20.174 | 54.873 | 10.917 |
| ATOM | 2779 | C    | TRP | 174 | 22.980 | 55.250 | 8.794  |
| ATOM | 2780 | O    | TRP | 174 | 22.892 | 56.395 | 9.234  |
| ATOM | 2781 | N    | ILE | 175 | 24.012 | 54.452 | 9.097  |
| ATOM | 2782 | H    | ILE | 175 | 23.989 | 53.493 | 8.764  |
| ATOM | 2783 | CA   | ILE | 175 | 25.162 | 54.882 | 9.909  |
| ATOM | 2784 | HA   | ILE | 175 | 24.781 | 55.507 | 10.717 |
| ATOM | 2785 | CB   | ILE | 175 | 25.833 | 53.657 | 10.586 |
| ATOM | 2786 | HB   | ILE | 175 | 26.063 | 52.918 | 9.820  |
| ATOM | 2787 | CG2  | ILE | 175 | 27.151 | 54.061 | 11.279 |
| ATOM | 2788 | 1HG2 | ILE | 175 | 26.947 | 54.721 | 12.123 |
| ATOM | 2789 | 2HG2 | ILE | 175 | 27.684 | 53.176 | 11.627 |
| ATOM | 2790 | 3HG2 | ILE | 175 | 27.821 | 54.564 | 10.584 |
| ATOM | 2791 | CG1  | ILE | 175 | 24.802 | 53.045 | 11.577 |
| ATOM | 2792 | 2HG1 | ILE | 175 | 24.299 | 53.863 | 12.091 |
| ATOM | 2793 | 3HG1 | ILE | 175 | 24.042 | 52.515 | 11.001 |
| ATOM | 2794 | CD1  | ILE | 175 | 25.285 | 52.078 | 12.669 |
| ATOM | 2795 | 1HD1 | ILE | 175 | 26.262 | 52.358 | 13.057 |
| ATOM | 2796 | 2HD1 | ILE | 175 | 24.583 | 52.123 | 13.501 |
| ATOM | 2797 | 3HD1 | ILE | 175 | 25.313 | 51.056 | 12.291 |
| ATOM | 2798 | C    | ILE | 175 | 26.116 | 55.796 | 9.112  |
| ATOM | 2799 | O    | ILE | 175 | 26.583 | 56.794 | 9.659  |
| ATOM | 2800 | N    | ALA | 176 | 26.340 | 55.553 | 7.813  |
| ATOM | 2801 | H    | ALA | 176 | 25.998 | 54.688 | 7.414  |
| ATOM | 2802 | CA   | ALA | 176 | 27.115 | 56.457 | 6.946  |
| ATOM | 2803 | HA   | ALA | 176 | 28.101 | 56.608 | 7.392  |
| ATOM | 2804 | CB   | ALA | 176 | 27.320 | 55.800 | 5.570  |
| ATOM | 2805 | 1HB  | ALA | 176 | 27.678 | 54.777 | 5.686  |
| ATOM | 2806 | 2HB  | ALA | 176 | 26.389 | 55.794 | 5.004  |
| ATOM | 2807 | 3HB  | ALA | 176 | 28.071 | 56.367 | 5.016  |
| ATOM | 2808 | C    | ALA | 176 | 26.449 | 57.845 | 6.827  |
| ATOM | 2809 | O    | ALA | 176 | 27.094 | 58.874 | 7.016  |
| ATOM | 2810 | N    | GLN | 177 | 25.122 | 57.890 | 6.652  |
| ATOM | 2811 | H    | GLN | 177 | 24.637 | 57.014 | 6.485  |
| ATOM | 2812 | CA   | GLN | 177 | 24.316 | 59.124 | 6.704  |
| ATOM | 2813 | HA   | GLN | 177 | 24.721 | 59.838 | 5.984  |
| ATOM | 2814 | CB   | GLN | 177 | 22.867 | 58.794 | 6.314  |

|      |      |      |     |     |        |        |        |
|------|------|------|-----|-----|--------|--------|--------|
| ATOM | 2815 | ZHB  | GLN | 177 | 22.538 | 57.910 | 6.863  |
| ATOM | 2816 | 3HB  | GLN | 177 | 22.219 | 59.628 | 6.590  |
| ATOM | 2817 | CG   | GLN | 177 | 22.713 | 58.561 | 4.806  |
| ATOM | 2818 | ZHG  | GLN | 177 | 22.974 | 59.483 | 4.284  |
| ATOM | 2819 | 3HG  | GLN | 177 | 23.394 | 57.780 | 4.472  |
| ATOM | 2820 | CD   | GLN | 177 | 21.296 | 58.159 | 4.412  |
| ATOM | 2821 | OE1  | GLN | 177 | 20.496 | 57.661 | 5.187  |
| ATOM | 2822 | NE2  | GLN | 177 | 20.932 | 58.346 | 3.164  |
| ATOM | 2823 | 1HE2 | GLN | 177 | 19.974 | 58.138 | 2.949  |
| ATOM | 2824 | 2HE2 | GLN | 177 | 21.559 | 58.790 | 2.518  |
| ATOM | 2825 | C    | GLN | 177 | 24.338 | 59.830 | 8.076  |
| ATOM | 2826 | O    | GLN | 177 | 23.937 | 60.988 | 8.177  |
| ATOM | 2827 | N    | ARG | 178 | 24.816 | 59.153 | 9.127  |
| ATOM | 2828 | H    | ARG | 178 | 25.094 | 58.195 | 8.965  |
| ATOM | 2829 | CA   | ARG | 178 | 25.060 | 59.690 | 10.476 |
| ATOM | 2830 | HA   | ARG | 178 | 24.546 | 60.649 | 10.565 |
| ATOM | 2831 | CB   | ARG | 178 | 24.476 | 58.710 | 11.515 |
| ATOM | 2832 | ZHB  | ARG | 178 | 24.368 | 57.717 | 11.081 |
| ATOM | 2833 | 3HB  | ARG | 178 | 25.134 | 58.628 | 12.381 |
| ATOM | 2834 | CG   | ARG | 178 | 23.116 | 59.213 | 11.095 |
| ATOM | 2835 | ZHG  | ARG | 178 | 23.286 | 60.108 | 12.598 |
| ATOM | 2836 | 3HG  | ARG | 178 | 22.505 | 59.483 | 11.133 |
| ATOM | 2837 | CD   | ARG | 178 | 22.366 | 58.157 | 12.820 |
| ATOM | 2838 | ZHD  | ARG | 178 | 21.809 | 57.501 | 12.147 |
| ATOM | 2839 | 3HD  | ARG | 178 | 23.084 | 57.545 | 13.372 |
| ATOM | 2840 | NE   | ARG | 178 | 21.440 | 58.781 | 13.778 |
| ATOM | 2841 | HE   | ARG | 178 | 21.660 | 58.654 | 14.755 |
| ATOM | 2842 | CZ   | ARG | 178 | 20.382 | 59.511 | 13.485 |
| ATOM | 2843 | NH1  | ARG | 178 | 19.725 | 60.090 | 14.444 |
| ATOM | 2844 | 1HH1 | ARG | 178 | 20.058 | 60.001 | 15.390 |
| ATOM | 2845 | 2HH1 | ARG | 178 | 18.938 | 60.676 | 14.241 |
| ATOM | 2846 | NH2  | ARG | 178 | 19.947 | 59.681 | 12.264 |
| ATOM | 2847 | 1HH2 | ARG | 178 | 20.414 | 59.201 | 11.513 |
| ATOM | 2848 | 2HH2 | ARG | 178 | 19.166 | 60.281 | 12.075 |
| ATOM | 2849 | C    | ARG | 178 | 26.527 | 60.048 | 10.754 |
| ATOM | 2850 | O    | ARG | 178 | 26.855 | 60.373 | 11.888 |
| ATOM | 2851 | N    | GLY | 179 | 27.398 | 60.010 | 9.742  |
| ATOM | 2852 | H    | GLY | 179 | 27.064 | 59.733 | 8.828  |
| ATOM | 2853 | CA   | GLY | 179 | 28.821 | 60.346 | 9.872  |
| ATOM | 2854 | ZHA  | GLY | 179 | 29.195 | 60.638 | 8.891  |
| ATOM | 2855 | 3HA  | GLY | 179 | 28.938 | 61.192 | 10.550 |
| ATOM | 2856 | C    | GLY | 179 | 29.710 | 59.206 | 10.381 |
| ATOM | 2857 | O    | GLY | 179 | 30.817 | 59.464 | 10.844 |
| ATOM | 2858 | N    | GLY | 180 | 29.240 | 57.958 | 10.309 |
| ATOM | 2859 | H    | GLY | 180 | 28.299 | 57.818 | 9.963  |
| ATOM | 2860 | CA   | GLY | 180 | 29.962 | 56.788 | 10.808 |
| ATOM | 2861 | ZHA  | GLY | 180 | 29.652 | 55.912 | 10.241 |
| ATOM | 2862 | 3HA  | GLY | 180 | 31.032 | 56.920 | 10.652 |
| ATOM | 2863 | C    | GLY | 180 | 29.730 | 56.515 | 12.297 |
| ATOM | 2864 | O    | GLY | 180 | 29.077 | 57.279 | 13.010 |
| ATOM | 2865 | N    | TRP | 181 | 30.267 | 55.390 | 12.773 |
| ATOM | 2866 | H    | TRP | 181 | 30.798 | 54.809 | 12.140 |
| ATOM | 2867 | CA   | TRP | 181 | 30.017 | 54.861 | 14.121 |
| ATOM | 2868 | HA   | TRP | 181 | 28.956 | 54.632 | 14.221 |
| ATOM | 2869 | CB   | TRP | 181 | 30.798 | 53.552 | 14.280 |
| ATOM | 2870 | ZHB  | TRP | 181 | 31.776 | 53.631 | 13.800 |
| ATOM | 2871 | 3HB  | TRP | 181 | 30.983 | 53.385 | 15.334 |
| ATOM | 2872 | CG   | TRP | 181 | 30.074 | 52.350 | 13.768 |
| ATOM | 2873 | CD1  | TRP | 181 | 30.359 | 51.677 | 12.631 |
| ATOM | 2874 | HD1  | TRP | 181 | 31.172 | 51.907 | 11.952 |
| ATOM | 2875 | NE1  | TRP | 181 | 29.466 | 50.635 | 12.485 |
| ATOM | 2876 | HE1  | TRP | 181 | 29.509 | 49.955 | 11.728 |
| ATOM | 2877 | CE2  | TRP | 181 | 28.573 | 50.568 | 13.526 |
| ATOM | 2878 | CZ2  | TRP | 181 | 27.505 | 49.706 | 13.815 |
| ATOM | 2879 | HZ2  | TRP | 181 | 27.255 | 48.905 | 13.134 |
| ATOM | 2880 | CH2  | TRP | 181 | 26.773 | 49.901 | 14.997 |
| ATOM | 2881 | HH2  | TRP | 181 | 25.943 | 49.251 | 15.232 |
| ATOM | 2882 | CZ3  | TRP | 181 | 27.133 | 50.934 | 15.881 |
| ATOM | 2883 | HZ3  | TRP | 181 | 26.584 | 51.052 | 16.803 |
| ATOM | 2884 | CE3  | TRP | 181 | 28.208 | 51.797 | 15.578 |
| ATOM | 2885 | HE3  | TRP | 181 | 28.488 | 52.576 | 16.271 |
| ATOM | 2886 | CD2  | TRP | 181 | 28.947 | 51.645 | 14.382 |
| ATOM | 2887 | C    | TRP | 181 | 30.346 | 55.840 | 15.255 |
| ATOM | 2888 | O    | TRP | 181 | 29.586 | 55.939 | 16.218 |
| ATOM | 2889 | N    | VAL | 182 | 31.429 | 56.611 | 15.129 |
| ATOM | 2890 | H    | VAL | 182 | 32.018 | 56.478 | 14.320 |
| ATOM | 2891 | CA   | VAL | 182 | 31.862 | 57.565 | 16.165 |
| ATOM | 2892 | HA   | VAL | 182 | 31.913 | 57.029 | 17.115 |
| ATOM | 2893 | CB   | VAL | 182 | 33.262 | 58.126 | 15.837 |
| ATOM | 2894 | HB   | VAL | 182 | 33.167 | 58.871 | 15.045 |
| ATOM | 2895 | CG1  | VAL | 182 | 33.892 | 58.785 | 17.066 |
| ATOM | 2896 | 1HG1 | VAL | 182 | 33.308 | 59.653 | 17.369 |
| ATOM | 2897 | 2HG1 | VAL | 182 | 34.902 | 59.118 | 16.830 |
| ATOM | 2898 | 3HG1 | VAL | 182 | 33.933 | 58.072 | 17.892 |
| ATOM | 2899 | CG2  | VAL | 182 | 34.241 | 57.042 | 15.357 |
| ATOM | 2900 | 1HG2 | VAL | 182 | 35.252 | 57.446 | 15.317 |
| ATOM | 2901 | 2HG2 | VAL | 182 | 33.977 | 56.718 | 14.352 |
| ATOM | 2902 | 3HG2 | VAL | 182 | 34.223 | 56.190 | 16.038 |
| ATOM | 2903 | C    | VAL | 182 | 30.861 | 58.716 | 16.347 |
| ATOM | 2904 | O    | VAL | 182 | 30.573 | 59.122 | 17.471 |
| ATOM | 2905 | N    | ALA | 183 | 30.285 | 59.215 | 15.248 |
| ATOM | 2906 | H    | ALA | 183 | 30.516 | 58.817 | 14.351 |
| ATOM | 2907 | CA   | ALA | 183 | 29.262 | 60.261 | 15.276 |
| ATOM | 2908 | HA   | ALA | 183 | 29.523 | 60.993 | 16.043 |
| ATOM | 2909 | CB   | ALA | 183 | 29.270 | 60.966 | 13.918 |
| ATOM | 2910 | 1HB  | ALA | 183 | 30.178 | 61.559 | 13.818 |
| ATOM | 2911 | 2HB  | ALA | 183 | 29.227 | 60.230 | 13.117 |
| ATOM | 2912 | 3HB  | ALA | 183 | 28.403 | 61.623 | 13.845 |
| ATOM | 2913 | C    | ALA | 183 | 27.870 | 59.714 | 15.643 |
| ATOM | 2914 | O    | ALA | 183 | 27.130 | 60.370 | 16.375 |
| ATOM | 2915 | N    | ALA | 184 | 27.536 | 58.494 | 15.206 |
| ATOM | 2916 | H    | ALA | 184 | 28.151 | 58.036 | 14.545 |
| ATOM | 2917 | CA   | ALA | 184 | 26.300 | 57.816 | 15.589 |
| ATOM | 2918 | HA   | ALA | 184 | 25.464 | 58.465 | 15.370 |
| ATOM | 2919 | CB   | ALA | 184 | 26.162 | 56.532 | 14.765 |

|      |      |      |     |     |        |        |        |
|------|------|------|-----|-----|--------|--------|--------|
| ATOM | 2920 | 1HB  | ALA | 184 | 25.438 | 55.866 | 15.238 |
| ATOM | 2921 | 2HB  | ALA | 184 | 25.814 | 56.779 | 13.763 |
| ATOM | 2922 | 3HB  | ALA | 184 | 27.120 | 56.019 | 14.697 |
| ATOM | 2923 | C    | ALA | 184 | 26.216 | 57.520 | 17.098 |
| ATOM | 2924 | O    | ALA | 184 | 25.138 | 57.645 | 17.674 |
| ATOM | 2925 | N    | LEU | 185 | 27.328 | 57.149 | 17.760 |
| ATOM | 2926 | H    | LEU | 185 | 28.179 | 56.997 | 17.234 |
| ATOM | 2927 | CA   | LEU | 185 | 27.331 | 56.763 | 19.187 |
| ATOM | 2928 | HA   | LEU | 185 | 26.436 | 56.151 | 19.367 |
| ATOM | 2929 | CB   | LEU | 185 | 28.594 | 55.926 | 19.484 |
| ATOM | 2930 | 2HB  | LEU | 185 | 28.536 | 55.001 | 18.895 |
| ATOM | 2931 | 3HB  | LEU | 185 | 29.455 | 56.510 | 19.142 |
| ATOM | 2932 | CG   | LEU | 185 | 28.771 | 55.609 | 20.985 |
| ATOM | 2933 | HG   | LEU | 185 | 28.774 | 56.543 | 21.540 |
| ATOM | 2934 | CD1  | LEU | 185 | 27.676 | 54.701 | 21.522 |
| ATOM | 2935 | 1HD1 | LEU | 185 | 26.693 | 55.196 | 21.502 |
| ATOM | 2936 | 2HD1 | LEU | 185 | 27.893 | 54.469 | 22.548 |
| ATOM | 2937 | 3HD1 | LEU | 185 | 27.611 | 53.793 | 20.948 |
| ATOM | 2938 | CD2  | LEU | 185 | 30.104 | 54.935 | 21.238 |
| ATOM | 2939 | 1HD2 | LEU | 185 | 30.914 | 55.453 | 20.708 |
| ATOM | 2940 | 2HD2 | LEU | 185 | 30.087 | 53.880 | 20.960 |
| ATOM | 2941 | 3HD2 | LEU | 185 | 30.320 | 55.019 | 22.290 |
| ATOM | 2942 | C    | LEU | 185 | 27.230 | 57.958 | 20.147 |
| ATOM | 2943 | O    | LEU | 185 | 26.487 | 57.875 | 21.125 |
| ATOM | 2944 | N    | ASN | 186 | 28.011 | 59.020 | 19.903 |
| ATOM | 2945 | H    | ASN | 186 | 28.625 | 58.975 | 19.104 |
| ATOM | 2946 | CA   | ASN | 186 | 28.133 | 60.195 | 20.784 |
| ATOM | 2947 | HA   | ASN | 186 | 28.644 | 59.913 | 21.708 |
| ATOM | 2948 | CB   | ASN | 186 | 29.000 | 61.217 | 20.020 |
| ATOM | 2949 | 2HB  | ASN | 186 | 29.943 | 60.750 | 19.747 |
| ATOM | 2950 | 3HB  | ASN | 186 | 28.473 | 61.514 | 19.113 |
| ATOM | 2951 | CG   | ASN | 186 | 29.350 | 62.443 | 20.836 |
| ATOM | 2952 | OD1  | ASN | 186 | 29.519 | 62.418 | 22.035 |
| ATOM | 2953 | ND2  | ASN | 186 | 29.572 | 63.550 | 20.168 |
| ATOM | 2954 | 1HD2 | ASN | 186 | 29.868 | 64.335 | 20.719 |
| ATOM | 2955 | 2HD2 | ASN | 186 | 29.549 | 63.538 | 19.177 |
| ATOM | 2956 | C    | ASN | 186 | 26.767 | 60.821 | 21.160 |
| ATOM | 2957 | O    | ASN | 186 | 26.610 | 61.463 | 22.193 |
| ATOM | 2958 | N    | LEU | 187 | 25.787 | 60.670 | 20.266 |
| ATOM | 2959 | H    | LEU | 187 | 26.024 | 60.147 | 19.437 |
| ATOM | 2960 | CA   | LEU | 187 | 24.545 | 61.426 | 20.246 |
| ATOM | 2961 | HA   | LEU | 187 | 24.750 | 62.377 | 20.734 |
| ATOM | 2962 | CB   | LEU | 187 | 24.250 | 61.679 | 18.753 |
| ATOM | 2963 | 2HB  | LEU | 187 | 25.181 | 61.576 | 18.184 |
| ATOM | 2964 | 3HB  | LEU | 187 | 23.564 | 60.919 | 18.374 |
| ATOM | 2965 | CG   | LEU | 187 | 23.712 | 63.083 | 18.456 |
| ATOM | 2966 | HG   | LEU | 187 | 24.368 | 63.827 | 18.919 |
| ATOM | 2967 | CD1  | LEU | 187 | 23.717 | 63.290 | 16.939 |
| ATOM | 2968 | 1HD1 | LEU | 187 | 23.217 | 62.454 | 16.456 |
| ATOM | 2969 | 2HD1 | LEU | 187 | 23.208 | 64.218 | 16.696 |
| ATOM | 2970 | 3HD1 | LEU | 187 | 24.744 | 63.344 | 16.589 |
| ATOM | 2971 | CD2  | LEU | 187 | 22.284 | 63.274 | 18.973 |
| ATOM | 2972 | 1HD2 | LEU | 187 | 21.886 | 64.227 | 18.634 |
| ATOM | 2973 | 2HD2 | LEU | 187 | 21.657 | 62.463 | 18.616 |
| ATOM | 2974 | 3HD2 | LEU | 187 | 22.271 | 63.270 | 20.065 |
| ATOM | 2975 | C    | LEU | 187 | 23.422 | 60.750 | 21.050 |
| ATOM | 2976 | O    | LEU | 187 | 22.248 | 60.748 | 20.664 |

END

DATASET 56

HEADER APOPTOSIS 29-OCT-11 XXXX  
 TITLE 3D MODEL OF BAK IN COMPLEX WITH THE BH3 DOMAIN OF BIM  
 COMPN1 MOLECULE: APOPTOSIS REGULATOR BAK;  
 COMPN2 2 SYNONYM: BCL-2 HOMOLOGOUS ANTAGONIST/KILLER, BCL-2- LIKE 7  
 COMPN3 3 PROTEIN;  
 SOURCE MOLECULE 1 (RESIDUES 1-24): BIM;  
 SOURCE 2 NCBI ACCESSION: 043521;  
 SOURCE 3 ORGANISM\_SCIENTIFIC: HOMO SAPIENS;  
 SOURCE 4 ORGANISM\_COMMON: HUMAN;  
 SOURCE 5 MOLECULE 2 (RESIDUES 25-187): BAK;  
 SOURCE 6 NCBI ACCESSION: Q16611;  
 SOURCE 7 ORGANISM\_SCIENTIFIC: HOMO SAPIENS;  
 SOURCE 8 ORGANISM\_COMMON: HUMAN;  
 KEYWDS HETERODIMER, APOPTOSIS  
 EXPDTA THEORETICAL MODEL  
 JRNL AUTH Y-P PANG, H DAI, A SMITH, XW MENG, PA SCHNEIDER, SH KAUFMANN  
 JRNL TITL BAK CONFORMATIONAL CHANGES INDUCED BY LIGAND BINDING:  
 JRNL TITL 2 INSIGHT INTO BH3 DOMAIN BINDING AND BAK HOMO-OLIGOMERIZATION  
 JRNL REF SCIENTIFIC REPORTS, SUBMITTED  
 REMARK 220 THIS IS AN INSTANTANEOUS CONFORMATION CLOSEST TO THE  
 REMARK 220 AVERAGE OF 19,500 SIMILAR CONFORMERS IDENTIFIED BY  
 REMARK 220 CLUSTER ANALYSIS OF 80 10-NS MOLECULAR  
 REMARK 220 DYNAMICS SIMULATIONS OF BAK\*NOXA USING PMEMD WITH  
 REMARK 220 THE FF99SB FORCE FIELD. NOTE: THIS MODEL  
 REMARK 220 CONTAINS WATERS.  
 MOL 1  
 ATOM 1 N ARG 1 2.395 31.464 13.980 0.00 0.00 N  
 ATOM 2 CA ARG 1 2.047 32.574 14.815 0.00 0.00 C  
 ATOM 3 C ARG 1 3.313 33.081 15.538 0.00 0.00 C  
 ATOM 4 O ARG 1 3.699 34.190 15.247 0.00 0.00 O  
 ATOM 5 CB ARG 1 1.244 33.686 14.062 0.00 0.00 C  
 ATOM 6 CG ARG 1 -0.125 33.130 13.655 0.00 0.00 C  
 ATOM 7 CD ARG 1 -0.776 34.118 12.689 0.00 0.00 C  
 ATOM 8 NE ARG 1 -1.969 33.558 12.097 0.00 0.00 N  
 ATOM 9 CZ ARG 1 -2.162 33.135 10.866 0.00 0.00 C  
 ATOM 10 NH1 ARG 1 -1.222 33.090 9.965 0.00 0.00 N1+  
 ATOM 11 NH2 ARG 1 -3.356 32.774 10.532 0.00 0.00 N  
 ATOM 12 H ARG 1 3.251 31.427 13.446 0.00 0.00 H  
 ATOM 13 HA ARG 1 1.424 32.126 15.590 0.00 0.00 H  
 ATOM 14 HB2 ARG 1 1.151 34.581 14.678 0.00 0.00 H  
 ATOM 15 HB3 ARG 1 1.832 33.944 13.181 0.00 0.00 H  
 ATOM 16 HG2 ARG 1 0.086 32.205 13.118 0.00 0.00 H  
 ATOM 17 HG3 ARG 1 -0.761 32.964 14.524 0.00 0.00 H  
 ATOM 18 HD2 ARG 1 -1.106 34.990 13.252 0.00 0.00 H  
 ATOM 19 HD3 ARG 1 -0.090 34.441 11.905 0.00 0.00 H

|      |     |      |     |   |        |        |        |      |      |     |
|------|-----|------|-----|---|--------|--------|--------|------|------|-----|
| ATOM | 20  | HE   | ARG | 1 | -2.812 | 33.421 | 12.636 | 0.00 | 0.00 | H   |
| ATOM | 21  | HH11 | ARG | 1 | -0.250 | 33.243 | 10.191 | 0.00 | 0.00 | H   |
| ATOM | 22  | HH12 | ARG | 1 | -1.386 | 32.624 | 9.083  | 0.00 | 0.00 | H   |
| ATOM | 23  | HH21 | ARG | 1 | -4.009 | 32.770 | 11.302 | 0.00 | 0.00 | H   |
| ATOM | 24  | HH22 | ARG | 1 | -3.604 | 32.780 | 9.553  | 0.00 | 0.00 | H   |
| ATOM | 25  | N    | PRO | 2 | 4.118  | 32.251 | 16.244 | 0.00 | 0.00 | N   |
| ATOM | 26  | CA   | PRO | 2 | 5.220  | 32.808 | 17.128 | 0.00 | 0.00 | C   |
| ATOM | 27  | C    | PRO | 2 | 6.302  | 33.551 | 16.314 | 0.00 | 0.00 | C   |
| ATOM | 28  | O    | PRO | 2 | 6.773  | 34.547 | 16.715 | 0.00 | 0.00 | O   |
| ATOM | 29  | CB   | PRO | 2 | 5.787  | 31.588 | 17.838 | 0.00 | 0.00 | C   |
| ATOM | 30  | CG   | PRO | 2 | 4.575  | 30.605 | 17.990 | 0.00 | 0.00 | C   |
| ATOM | 31  | CD   | PRO | 2 | 3.805  | 30.911 | 16.684 | 0.00 | 0.00 | C   |
| ATOM | 32  | HA   | PRO | 2 | 4.759  | 33.390 | 17.925 | 0.00 | 0.00 | H   |
| ATOM | 33  | HB2  | PRO | 2 | 6.218  | 31.824 | 18.811 | 0.00 | 0.00 | H   |
| ATOM | 34  | HB3  | PRO | 2 | 6.583  | 31.092 | 17.281 | 0.00 | 0.00 | H   |
| ATOM | 35  | HG2  | PRO | 2 | 4.909  | 29.575 | 18.119 | 0.00 | 0.00 | H   |
| ATOM | 36  | HG3  | PRO | 2 | 4.030  | 30.912 | 18.883 | 0.00 | 0.00 | H   |
| ATOM | 37  | HD2  | PRO | 2 | 4.129  | 30.134 | 15.992 | 0.00 | 0.00 | H   |
| ATOM | 38  | HD3  | PRO | 2 | 2.736  | 30.837 | 16.890 | 0.00 | 0.00 | H   |
| ATOM | 39  | N    | GLU | 3 | 6.604  | 33.109 | 15.084 | 0.00 | 0.00 | N   |
| ATOM | 40  | CA   | GLU | 3 | 7.737  | 33.641 | 14.280 | 0.00 | 0.00 | C   |
| ATOM | 41  | C    | GLU | 3 | 7.471  | 35.120 | 13.922 | 0.00 | 0.00 | C   |
| ATOM | 42  | O    | GLU | 3 | 8.364  | 35.976 | 13.734 | 0.00 | 0.00 | O   |
| ATOM | 43  | CB   | GLU | 3 | 8.139  | 32.694 | 13.150 | 0.00 | 0.00 | C   |
| ATOM | 44  | CG   | GLU | 3 | 7.026  | 32.303 | 12.173 | 0.00 | 0.00 | C   |
| ATOM | 45  | CD   | GLU | 3 | 6.063  | 31.228 | 12.645 | 0.00 | 0.00 | C   |
| ATOM | 46  | OE1  | GLU | 3 | 6.470  | 30.079 | 12.739 | 0.00 | 0.00 | O   |
| ATOM | 47  | OE2  | GLU | 3 | 4.910  | 31.502 | 12.864 | 0.00 | 0.00 | O1- |
| ATOM | 48  | H    | GLU | 3 | 6.114  | 32.259 | 14.843 | 0.00 | 0.00 | H   |
| ATOM | 49  | HA   | GLU | 3 | 8.630  | 33.721 | 14.900 | 0.00 | 0.00 | H   |
| ATOM | 50  | HB2  | GLU | 3 | 8.951  | 33.182 | 12.611 | 0.00 | 0.00 | H   |
| ATOM | 51  | HB3  | GLU | 3 | 8.524  | 31.788 | 13.619 | 0.00 | 0.00 | H   |
| ATOM | 52  | HG2  | GLU | 3 | 6.420  | 33.126 | 11.795 | 0.00 | 0.00 | H   |
| ATOM | 53  | HG3  | GLU | 3 | 7.455  | 31.939 | 11.239 | 0.00 | 0.00 | H   |
| ATOM | 54  | N    | ILE | 4 | 6.203  | 35.431 | 13.865 | 0.00 | 0.00 | N   |
| ATOM | 55  | CA   | ILE | 4 | 5.673  | 36.752 | 13.550 | 0.00 | 0.00 | C   |
| ATOM | 56  | C    | ILE | 4 | 5.637  | 37.667 | 14.793 | 0.00 | 0.00 | C   |
| ATOM | 57  | O    | ILE | 4 | 5.946  | 38.894 | 14.811 | 0.00 | 0.00 | O   |
| ATOM | 58  | CB   | ILE | 4 | 4.287  | 36.626 | 12.874 | 0.00 | 0.00 | C   |
| ATOM | 59  | CG1  | ILE | 4 | 4.082  | 35.389 | 11.884 | 0.00 | 0.00 | C   |
| ATOM | 60  | CG2  | ILE | 4 | 4.213  | 38.006 | 12.121 | 0.00 | 0.00 | C   |
| ATOM | 61  | CD1  | ILE | 4 | 5.024  | 35.319 | 10.655 | 0.00 | 0.00 | C   |
| ATOM | 62  | H    | ILE | 4 | 5.517  | 34.703 | 14.010 | 0.00 | 0.00 | H   |
| ATOM | 63  | HA   | ILE | 4 | 6.385  | 37.270 | 12.906 | 0.00 | 0.00 | H   |
| ATOM | 64  | HB   | ILE | 4 | 3.497  | 36.578 | 13.624 | 0.00 | 0.00 | H   |
| ATOM | 65  | HG12 | ILE | 4 | 4.264  | 34.430 | 12.370 | 0.00 | 0.00 | H   |
| ATOM | 66  | HG13 | ILE | 4 | 3.067  | 35.387 | 11.491 | 0.00 | 0.00 | H   |
| ATOM | 67  | HG21 | ILE | 4 | 4.047  | 38.862 | 12.775 | 0.00 | 0.00 | H   |
| ATOM | 68  | HG22 | ILE | 4 | 5.086  | 38.120 | 11.479 | 0.00 | 0.00 | H   |
| ATOM | 69  | HG23 | ILE | 4 | 3.315  | 37.983 | 11.504 | 0.00 | 0.00 | H   |
| ATOM | 70  | HD11 | ILE | 4 | 4.860  | 34.372 | 10.142 | 0.00 | 0.00 | H   |
| ATOM | 71  | HD12 | ILE | 4 | 4.723  | 36.105 | 9.961  | 0.00 | 0.00 | H   |
| ATOM | 72  | HD13 | ILE | 4 | 6.072  | 35.437 | 10.931 | 0.00 | 0.00 | H   |
| ATOM | 73  | N    | TRP | 5 | 5.250  | 37.031 | 15.918 | 0.00 | 0.00 | N   |
| ATOM | 74  | CA   | TRP | 5 | 5.119  | 37.682 | 17.220 | 0.00 | 0.00 | C   |
| ATOM | 75  | C    | TRP | 5 | 6.520  | 38.074 | 17.760 | 0.00 | 0.00 | C   |
| ATOM | 76  | O    | TRP | 5 | 6.741  | 39.197 | 18.235 | 0.00 | 0.00 | O   |
| ATOM | 77  | CB   | TRP | 5 | 4.243  | 36.799 | 18.169 | 0.00 | 0.00 | C   |
| ATOM | 78  | CG   | TRP | 5 | 2.882  | 36.347 | 17.686 | 0.00 | 0.00 | C   |
| ATOM | 79  | CD1  | TRP | 5 | 1.934  | 37.134 | 17.104 | 0.00 | 0.00 | C   |
| ATOM | 80  | CD2  | TRP | 5 | 2.141  | 35.094 | 18.046 | 0.00 | 0.00 | C   |
| ATOM | 81  | CE2  | TRP | 5 | 0.901  | 35.093 | 17.385 | 0.00 | 0.00 | C   |
| ATOM | 82  | CE3  | TRP | 5 | 2.492  | 34.096 | 18.956 | 0.00 | 0.00 | C   |
| ATOM | 83  | NE1  | TRP | 5 | 0.853  | 36.365 | 16.815 | 0.00 | 0.00 | N   |
| ATOM | 84  | CZ2  | TRP | 5 | 0.096  | 33.998 | 17.466 | 0.00 | 0.00 | C   |
| ATOM | 85  | CZ3  | TRP | 5 | 1.664  | 32.992 | 19.082 | 0.00 | 0.00 | C   |
| ATOM | 86  | CH2  | TRP | 5 | 0.446  | 32.946 | 18.388 | 0.00 | 0.00 | C   |
| ATOM | 87  | H    | TRP | 5 | 4.979  | 36.058 | 15.918 | 0.00 | 0.00 | H   |
| ATOM | 88  | HA   | TRP | 5 | 4.541  | 38.603 | 17.143 | 0.00 | 0.00 | H   |
| ATOM | 89  | HB2  | TRP | 5 | 4.745  | 35.976 | 18.677 | 0.00 | 0.00 | H   |
| ATOM | 90  | HB3  | TRP | 5 | 4.036  | 37.548 | 18.933 | 0.00 | 0.00 | H   |
| ATOM | 91  | HD1  | TRP | 5 | 2.054  | 38.155 | 16.774 | 0.00 | 0.00 | H   |
| ATOM | 92  | HE1  | TRP | 5 | 0.067  | 36.711 | 16.284 | 0.00 | 0.00 | H   |
| ATOM | 93  | HE3  | TRP | 5 | 3.420  | 34.109 | 19.508 | 0.00 | 0.00 | H   |
| ATOM | 94  | HZ2  | TRP | 5 | -0.840 | 34.043 | 16.930 | 0.00 | 0.00 | H   |
| ATOM | 95  | HZ3  | TRP | 5 | 2.046  | 32.135 | 19.618 | 0.00 | 0.00 | H   |
| ATOM | 96  | HH2  | TRP | 5 | -0.204 | 32.090 | 18.507 | 0.00 | 0.00 | H   |
| ATOM | 97  | N    | ILE | 6 | 7.477  | 37.151 | 17.657 | 0.00 | 0.00 | N   |
| ATOM | 98  | CA   | ILE | 6 | 8.804  | 37.333 | 18.229 | 0.00 | 0.00 | C   |
| ATOM | 99  | C    | ILE | 6 | 9.617  | 38.374 | 17.420 | 0.00 | 0.00 | C   |
| ATOM | 100 | O    | ILE | 6 | 10.313 | 39.114 | 18.073 | 0.00 | 0.00 | O   |
| ATOM | 101 | CB   | ILE | 6 | 9.417  | 35.984 | 18.456 | 0.00 | 0.00 | C   |
| ATOM | 102 | CG1  | ILE | 6 | 10.599 | 36.087 | 19.471 | 0.00 | 0.00 | C   |
| ATOM | 103 | CG2  | ILE | 6 | 9.815  | 35.383 | 17.090 | 0.00 | 0.00 | C   |
| ATOM | 104 | CD1  | ILE | 6 | 10.284 | 36.660 | 20.866 | 0.00 | 0.00 | C   |
| ATOM | 105 | H    | ILE | 6 | 7.217  | 36.264 | 17.248 | 0.00 | 0.00 | H   |
| ATOM | 106 | HA   | ILE | 6 | 8.587  | 37.775 | 19.201 | 0.00 | 0.00 | H   |
| ATOM | 107 | HB   | ILE | 6 | 8.622  | 35.364 | 18.870 | 0.00 | 0.00 | H   |
| ATOM | 108 | HG12 | ILE | 6 | 10.974 | 35.071 | 19.597 | 0.00 | 0.00 | H   |
| ATOM | 109 | HG13 | ILE | 6 | 11.356 | 36.672 | 18.947 | 0.00 | 0.00 | H   |
| ATOM | 110 | HG21 | ILE | 6 | 10.735 | 35.814 | 16.694 | 0.00 | 0.00 | H   |
| ATOM | 111 | HG22 | ILE | 6 | 10.110 | 34.354 | 17.295 | 0.00 | 0.00 | H   |
| ATOM | 112 | HG23 | ILE | 6 | 9.101  | 35.416 | 16.266 | 0.00 | 0.00 | H   |
| ATOM | 113 | HD11 | ILE | 6 | 11.166 | 36.460 | 21.475 | 0.00 | 0.00 | H   |
| ATOM | 114 | HD12 | ILE | 6 | 10.109 | 37.736 | 20.841 | 0.00 | 0.00 | H   |
| ATOM | 115 | HD13 | ILE | 6 | 9.531  | 36.053 | 21.368 | 0.00 | 0.00 | H   |
| ATOM | 116 | N    | ALA | 7 | 9.383  | 38.454 | 16.084 | 0.00 | 0.00 | N   |
| ATOM | 117 | CA   | ALA | 7 | 9.896  | 39.498 | 15.203 | 0.00 | 0.00 | C   |
| ATOM | 118 | C    | ALA | 7 | 9.255  | 40.897 | 15.384 | 0.00 | 0.00 | C   |
| ATOM | 119 | O    | ALA | 7 | 9.973  | 41.892 | 15.354 | 0.00 | 0.00 | O   |
| ATOM | 120 | CB   | ALA | 7 | 9.733  | 38.940 | 13.772 | 0.00 | 0.00 | C   |
| ATOM | 121 | H    | ALA | 7 | 8.708  | 37.812 | 15.693 | 0.00 | 0.00 | H   |
| ATOM | 122 | HA   | ALA | 7 | 10.958 | 39.652 | 15.389 | 0.00 | 0.00 | H   |
| ATOM | 123 | HB1  | ALA | 7 | 10.128 | 37.924 | 13.770 | 0.00 | 0.00 | H   |
| ATOM | 124 | HB2  | ALA | 7 | 8.673  | 38.885 | 13.522 | 0.00 | 0.00 | H   |

|      |     |      |     |    |        |        |        |      |      |     |
|------|-----|------|-----|----|--------|--------|--------|------|------|-----|
| ATOM | 125 | HB3  | ALA | 7  | 10.215 | 39.657 | 13.107 | 0.00 | 0.00 | H   |
| ATOM | 126 | N    | GLN | 8  | 7.928  | 40.906 | 15.680 | 0.00 | 0.00 | N   |
| ATOM | 127 | CA   | GLN | 8  | 7.349  | 42.152 | 16.283 | 0.00 | 0.00 | C   |
| ATOM | 128 | C    | GLN | 8  | 7.771  | 42.491 | 17.722 | 0.00 | 0.00 | C   |
| ATOM | 129 | O    | GLN | 8  | 7.869  | 43.659 | 18.143 | 0.00 | 0.00 | O   |
| ATOM | 130 | CB   | GLN | 8  | 5.813  | 42.002 | 16.245 | 0.00 | 0.00 | C   |
| ATOM | 131 | CG   | GLN | 8  | 5.136  | 43.376 | 16.234 | 0.00 | 0.00 | C   |
| ATOM | 132 | CD   | GLN | 8  | 3.596  | 43.323 | 16.316 | 0.00 | 0.00 | C   |
| ATOM | 133 | NE2  | GLN | 8  | 2.988  | 44.499 | 16.115 | 0.00 | 0.00 | N   |
| ATOM | 134 | OE1  | GLN | 8  | 2.952  | 42.274 | 16.544 | 0.00 | 0.00 | O   |
| ATOM | 135 | H    | GLN | 8  | 7.382  | 40.060 | 15.597 | 0.00 | 0.00 | H   |
| ATOM | 136 | HA   | GLN | 8  | 7.553  | 43.029 | 15.668 | 0.00 | 0.00 | H   |
| ATOM | 137 | HB2  | GLN | 8  | 5.652  | 41.436 | 15.327 | 0.00 | 0.00 | H   |
| ATOM | 138 | HB3  | GLN | 8  | 5.648  | 41.440 | 17.164 | 0.00 | 0.00 | H   |
| ATOM | 139 | HG2  | GLN | 8  | 5.421  | 43.852 | 17.173 | 0.00 | 0.00 | H   |
| ATOM | 140 | HG3  | GLN | 8  | 5.461  | 44.004 | 15.405 | 0.00 | 0.00 | H   |
| ATOM | 141 | HE21 | GLN | 8  | 1.984  | 44.480 | 16.227 | 0.00 | 0.00 | H   |
| ATOM | 142 | HE22 | GLN | 8  | 3.465  | 45.341 | 15.824 | 0.00 | 0.00 | H   |
| ATOM | 143 | N    | GLU | 9  | 8.117  | 41.504 | 18.603 | 0.00 | 0.00 | N   |
| ATOM | 144 | CA   | GLU | 9  | 8.547  | 41.816 | 19.941 | 0.00 | 0.00 | C   |
| ATOM | 145 | C    | GLU | 9  | 9.929  | 42.569 | 19.933 | 0.00 | 0.00 | C   |
| ATOM | 146 | O    | GLU | 9  | 9.960  | 43.587 | 20.611 | 0.00 | 0.00 | O   |
| ATOM | 147 | CB   | GLU | 9  | 8.629  | 40.544 | 20.809 | 0.00 | 0.00 | C   |
| ATOM | 148 | CG   | GLU | 9  | 7.289  | 40.219 | 21.370 | 0.00 | 0.00 | C   |
| ATOM | 149 | CD   | GLU | 9  | 7.286  | 39.066 | 22.352 | 0.00 | 0.00 | C   |
| ATOM | 150 | OE1  | GLU | 9  | 8.280  | 38.862 | 23.051 | 0.00 | 0.00 | O   |
| ATOM | 151 | OE2  | GLU | 9  | 6.236  | 38.430 | 22.481 | 0.00 | 0.00 | O1- |
| ATOM | 152 | H    | GLU | 9  | 7.921  | 40.578 | 18.254 | 0.00 | 0.00 | H   |
| ATOM | 153 | HA   | GLU | 9  | 7.869  | 42.534 | 20.400 | 0.00 | 0.00 | H   |
| ATOM | 154 | HB2  | GLU | 9  | 9.037  | 39.678 | 20.287 | 0.00 | 0.00 | H   |
| ATOM | 155 | HB3  | GLU | 9  | 9.189  | 40.839 | 21.696 | 0.00 | 0.00 | H   |
| ATOM | 156 | HG2  | GLU | 9  | 6.868  | 41.056 | 21.928 | 0.00 | 0.00 | H   |
| ATOM | 157 | HG3  | GLU | 9  | 6.531  | 40.096 | 20.596 | 0.00 | 0.00 | H   |
| ATOM | 158 | N    | LEU | 10 | 10.902 | 42.046 | 19.168 | 0.00 | 0.00 | N   |
| ATOM | 159 | CA   | LEU | 10 | 12.333 | 42.563 | 19.084 | 0.00 | 0.00 | C   |
| ATOM | 160 | C    | LEU | 10 | 12.218 | 44.081 | 18.701 | 0.00 | 0.00 | C   |
| ATOM | 161 | O    | LEU | 10 | 12.940 | 44.988 | 19.157 | 0.00 | 0.00 | O   |
| ATOM | 162 | CB   | LEU | 10 | 13.123 | 41.801 | 18.035 | 0.00 | 0.00 | C   |
| ATOM | 163 | CG   | LEU | 10 | 14.571 | 42.334 | 17.889 | 0.00 | 0.00 | C   |
| ATOM | 164 | CD1  | LEU | 10 | 15.239 | 42.369 | 19.232 | 0.00 | 0.00 | C   |
| ATOM | 165 | CD2  | LEU | 10 | 15.406 | 41.541 | 16.924 | 0.00 | 0.00 | C   |
| ATOM | 166 | H    | LEU | 10 | 10.770 | 41.239 | 18.575 | 0.00 | 0.00 | H   |
| ATOM | 167 | HA   | LEU | 10 | 12.794 | 42.502 | 20.070 | 0.00 | 0.00 | H   |
| ATOM | 168 | HB2  | LEU | 10 | 13.170 | 40.786 | 18.429 | 0.00 | 0.00 | H   |
| ATOM | 169 | HB3  | LEU | 10 | 12.734 | 41.822 | 17.016 | 0.00 | 0.00 | H   |
| ATOM | 170 | HG   | LEU | 10 | 14.548 | 43.350 | 17.494 | 0.00 | 0.00 | H   |
| ATOM | 171 | HD11 | LEU | 10 | 16.317 | 42.519 | 19.190 | 0.00 | 0.00 | H   |
| ATOM | 172 | HD12 | LEU | 10 | 14.834 | 43.172 | 19.846 | 0.00 | 0.00 | H   |
| ATOM | 173 | HD13 | LEU | 10 | 15.120 | 41.433 | 19.778 | 0.00 | 0.00 | H   |
| ATOM | 174 | HD21 | LEU | 10 | 15.985 | 40.804 | 17.482 | 0.00 | 0.00 | H   |
| ATOM | 175 | HD22 | LEU | 10 | 14.738 | 41.021 | 16.237 | 0.00 | 0.00 | H   |
| ATOM | 176 | HD23 | LEU | 10 | 16.065 | 42.185 | 16.342 | 0.00 | 0.00 | H   |
| ATOM | 177 | N    | ARG | 11 | 11.310 | 44.311 | 17.762 | 0.00 | 0.00 | N   |
| ATOM | 178 | CA   | ARG | 11 | 10.927 | 45.618 | 17.140 | 0.00 | 0.00 | C   |
| ATOM | 179 | C    | ARG | 11 | 10.429 | 46.574 | 18.220 | 0.00 | 0.00 | C   |
| ATOM | 180 | O    | ARG | 11 | 10.885 | 47.760 | 18.305 | 0.00 | 0.00 | O   |
| ATOM | 181 | CB   | ARG | 11 | 9.940  | 45.290 | 16.007 | 0.00 | 0.00 | C   |
| ATOM | 182 | CG   | ARG | 11 | 9.589  | 46.461 | 15.134 | 0.00 | 0.00 | C   |
| ATOM | 183 | CD   | ARG | 11 | 8.221  | 46.270 | 14.475 | 0.00 | 0.00 | C   |
| ATOM | 184 | NE   | ARG | 11 | 8.118  | 45.293 | 13.344 | 0.00 | 0.00 | N   |
| ATOM | 185 | CZ   | ARG | 11 | 7.012  | 44.754 | 12.890 | 0.00 | 0.00 | C   |
| ATOM | 186 | NH1  | ARG | 11 | 5.847  | 45.237 | 13.191 | 0.00 | 0.00 | N1+ |
| ATOM | 187 | NH2  | ARG | 11 | 7.053  | 43.736 | 12.181 | 0.00 | 0.00 | N   |
| ATOM | 188 | H    | ARG | 11 | 10.774 | 43.482 | 17.546 | 0.00 | 0.00 | H   |
| ATOM | 189 | HA   | ARG | 11 | 11.731 | 46.034 | 16.532 | 0.00 | 0.00 | H   |
| ATOM | 190 | HB2  | ARG | 11 | 10.267 | 44.444 | 15.403 | 0.00 | 0.00 | H   |
| ATOM | 191 | HB3  | ARG | 11 | 9.035  | 44.894 | 16.465 | 0.00 | 0.00 | H   |
| ATOM | 192 | HG2  | ARG | 11 | 9.507  | 47.436 | 15.615 | 0.00 | 0.00 | H   |
| ATOM | 193 | HG3  | ARG | 11 | 10.449 | 46.598 | 14.478 | 0.00 | 0.00 | H   |
| ATOM | 194 | HD2  | ARG | 11 | 7.518  | 45.938 | 15.239 | 0.00 | 0.00 | H   |
| ATOM | 195 | HD3  | ARG | 11 | 7.922  | 47.247 | 14.095 | 0.00 | 0.00 | H   |
| ATOM | 196 | HE   | ARG | 11 | 8.948  | 45.099 | 12.802 | 0.00 | 0.00 | H   |
| ATOM | 197 | HH11 | ARG | 11 | 5.896  | 46.218 | 13.425 | 0.00 | 0.00 | H   |
| ATOM | 198 | HH12 | ARG | 11 | 4.989  | 44.951 | 12.740 | 0.00 | 0.00 | H   |
| ATOM | 199 | HH21 | ARG | 11 | 7.893  | 43.180 | 12.251 | 0.00 | 0.00 | H   |
| ATOM | 200 | HH22 | ARG | 11 | 6.181  | 43.251 | 12.025 | 0.00 | 0.00 | H   |
| ATOM | 201 | N    | ARG | 12 | 9.425  | 46.101 | 19.072 | 0.00 | 0.00 | N   |
| ATOM | 202 | CA   | ARG | 12 | 8.984  | 46.880 | 20.234 | 0.00 | 0.00 | C   |
| ATOM | 203 | C    | ARG | 12 | 10.092 | 47.063 | 21.335 | 0.00 | 0.00 | C   |
| ATOM | 204 | O    | ARG | 12 | 10.101 | 48.200 | 21.888 | 0.00 | 0.00 | O   |
| ATOM | 205 | CB   | ARG | 12 | 7.728  | 46.306 | 20.804 | 0.00 | 0.00 | C   |
| ATOM | 206 | CG   | ARG | 12 | 6.559  | 46.724 | 19.900 | 0.00 | 0.00 | C   |
| ATOM | 207 | CD   | ARG | 12 | 5.318  | 45.901 | 20.253 | 0.00 | 0.00 | C   |
| ATOM | 208 | NE   | ARG | 12 | 4.197  | 46.302 | 19.455 | 0.00 | 0.00 | N   |
| ATOM | 209 | CZ   | ARG | 12 | 2.964  | 45.809 | 19.328 | 0.00 | 0.00 | C   |
| ATOM | 210 | NH1  | ARG | 12 | 2.617  | 44.773 | 19.935 | 0.00 | 0.00 | N1+ |
| ATOM | 211 | NH2  | ARG | 12 | 2.039  | 46.486 | 18.765 | 0.00 | 0.00 | N   |
| ATOM | 212 | H    | ARG | 12 | 9.219  | 45.115 | 19.015 | 0.00 | 0.00 | H   |
| ATOM | 213 | HA   | ARG | 12 | 8.895  | 47.878 | 19.805 | 0.00 | 0.00 | H   |
| ATOM | 214 | HB2  | ARG | 12 | 7.789  | 45.227 | 20.667 | 0.00 | 0.00 | H   |
| ATOM | 215 | HB3  | ARG | 12 | 7.529  | 46.611 | 21.832 | 0.00 | 0.00 | H   |
| ATOM | 216 | HG2  | ARG | 12 | 6.249  | 47.759 | 20.050 | 0.00 | 0.00 | H   |
| ATOM | 217 | HG3  | ARG | 12 | 6.937  | 46.641 | 18.881 | 0.00 | 0.00 | H   |
| ATOM | 218 | HD2  | ARG | 12 | 5.623  | 44.869 | 20.086 | 0.00 | 0.00 | H   |
| ATOM | 219 | HD3  | ARG | 12 | 5.062  | 45.882 | 21.312 | 0.00 | 0.00 | H   |
| ATOM | 220 | HE   | ARG | 12 | 4.442  | 47.134 | 18.939 | 0.00 | 0.00 | H   |
| ATOM | 221 | HH11 | ARG | 12 | 3.182  | 44.022 | 20.304 | 0.00 | 0.00 | H   |
| ATOM | 222 | HH12 | ARG | 12 | 1.629  | 44.719 | 20.137 | 0.00 | 0.00 | H   |
| ATOM | 223 | HH21 | ARG | 12 | 2.229  | 47.367 | 18.308 | 0.00 | 0.00 | H   |
| ATOM | 224 | HH22 | ARG | 12 | 1.171  | 46.024 | 18.533 | 0.00 | 0.00 | H   |
| ATOM | 225 | N    | ILE | 13 | 10.938 | 46.068 | 21.604 | 0.00 | 0.00 | N   |
| ATOM | 226 | CA   | ILE | 13 | 12.045 | 46.190 | 22.654 | 0.00 | 0.00 | C   |
| ATOM | 227 | C    | ILE | 13 | 13.330 | 46.953 | 22.187 | 0.00 | 0.00 | C   |
| ATOM | 228 | O    | ILE | 13 | 14.044 | 47.486 | 22.961 | 0.00 | 0.00 | O   |
| ATOM | 229 | CB   | ILE | 13 | 12.414 | 44.935 | 23.427 | 0.00 | 0.00 | C   |

|      |     |      |     |    |        |        |        |      |      |     |
|------|-----|------|-----|----|--------|--------|--------|------|------|-----|
| ATOM | 230 | CG1  | ILE | 13 | 12.985 | 43.871 | 22.426 | 0.00 | 0.00 | C   |
| ATOM | 231 | CG2  | ILE | 13 | 11.267 | 44.445 | 24.323 | 0.00 | 0.00 | C   |
| ATOM | 232 | CD1  | ILE | 13 | 13.476 | 42.503 | 22.963 | 0.00 | 0.00 | C   |
| ATOM | 233 | H    | ILE | 13 | 10.718 | 45.154 | 21.233 | 0.00 | 0.00 | H   |
| ATOM | 234 | HA   | ILE | 13 | 11.573 | 46.743 | 23.467 | 0.00 | 0.00 | H   |
| ATOM | 235 | HB   | ILE | 13 | 13.214 | 45.215 | 24.113 | 0.00 | 0.00 | H   |
| ATOM | 236 | HG12 | ILE | 13 | 12.088 | 43.607 | 21.866 | 0.00 | 0.00 | H   |
| ATOM | 237 | HG13 | ILE | 13 | 13.757 | 44.339 | 21.814 | 0.00 | 0.00 | H   |
| ATOM | 238 | HG21 | ILE | 13 | 11.057 | 45.257 | 25.020 | 0.00 | 0.00 | H   |
| ATOM | 239 | HG22 | ILE | 13 | 10.329 | 44.223 | 23.816 | 0.00 | 0.00 | H   |
| ATOM | 240 | HG23 | ILE | 13 | 11.571 | 43.542 | 24.851 | 0.00 | 0.00 | H   |
| ATOM | 241 | HD11 | ILE | 13 | 13.907 | 42.024 | 22.084 | 0.00 | 0.00 | H   |
| ATOM | 242 | HD12 | ILE | 13 | 14.252 | 42.522 | 23.728 | 0.00 | 0.00 | H   |
| ATOM | 243 | HD13 | ILE | 13 | 12.684 | 41.831 | 23.297 | 0.00 | 0.00 | H   |
| ATOM | 244 | N    | GLY | 14 | 13.378 | 47.119 | 20.864 | 0.00 | 0.00 | N   |
| ATOM | 245 | CA   | GLY | 14 | 14.090 | 48.247 | 20.215 | 0.00 | 0.00 | C   |
| ATOM | 246 | C    | GLY | 14 | 13.539 | 49.572 | 20.496 | 0.00 | 0.00 | C   |
| ATOM | 247 | O    | GLY | 14 | 14.217 | 50.435 | 21.052 | 0.00 | 0.00 | O   |
| ATOM | 248 | H    | GLY | 14 | 12.875 | 46.487 | 20.258 | 0.00 | 0.00 | H   |
| ATOM | 249 | HA2  | GLY | 14 | 15.103 | 48.297 | 20.614 | 0.00 | 0.00 | H   |
| ATOM | 250 | HA3  | GLY | 14 | 14.075 | 48.055 | 19.142 | 0.00 | 0.00 | H   |
| ATOM | 251 | N    | ASP | 15 | 12.251 | 49.810 | 20.277 | 0.00 | 0.00 | N   |
| ATOM | 252 | CA   | ASP | 15 | 11.677 | 51.117 | 20.445 | 0.00 | 0.00 | C   |
| ATOM | 253 | C    | ASP | 15 | 11.589 | 51.558 | 21.925 | 0.00 | 0.00 | C   |
| ATOM | 254 | O    | ASP | 15 | 11.682 | 52.751 | 22.218 | 0.00 | 0.00 | O   |
| ATOM | 255 | CB   | ASP | 15 | 10.273 | 51.160 | 19.878 | 0.00 | 0.00 | C   |
| ATOM | 256 | CG   | ASP | 15 | 10.240 | 51.286 | 18.363 | 0.00 | 0.00 | C   |
| ATOM | 257 | OD1  | ASP | 15 | 9.102  | 51.334 | 17.788 | 0.00 | 0.00 | O   |
| ATOM | 258 | OD2  | ASP | 15 | 11.324 | 51.431 | 17.679 | 0.00 | 0.00 | O1- |
| ATOM | 259 | H    | ASP | 15 | 11.655 | 49.051 | 19.977 | 0.00 | 0.00 | H   |
| ATOM | 260 | HA   | ASP | 15 | 12.295 | 51.863 | 19.944 | 0.00 | 0.00 | H   |
| ATOM | 261 | HB2  | ASP | 15 | 9.775  | 50.236 | 20.176 | 0.00 | 0.00 | H   |
| ATOM | 262 | HB3  | ASP | 15 | 9.700  | 51.982 | 20.308 | 0.00 | 0.00 | H   |
| ATOM | 263 | N    | GLU | 16 | 11.453 | 50.567 | 22.823 | 0.00 | 0.00 | N   |
| ATOM | 264 | CA   | GLU | 16 | 11.346 | 50.714 | 24.325 | 0.00 | 0.00 | C   |
| ATOM | 265 | C    | GLU | 16 | 12.719 | 51.186 | 24.835 | 0.00 | 0.00 | C   |
| ATOM | 266 | O    | GLU | 16 | 12.764 | 52.051 | 25.733 | 0.00 | 0.00 | O   |
| ATOM | 267 | CB   | GLU | 16 | 10.805 | 49.425 | 25.037 | 0.00 | 0.00 | C   |
| ATOM | 268 | CG   | GLU | 16 | 10.474 | 49.831 | 26.490 | 0.00 | 0.00 | C   |
| ATOM | 269 | CD   | GLU | 16 | 9.824  | 48.666 | 27.251 | 0.00 | 0.00 | C   |
| ATOM | 270 | OE1  | GLU | 16 | 10.368 | 48.356 | 28.330 | 0.00 | 0.00 | O   |
| ATOM | 271 | OE2  | GLU | 16 | 8.727  | 48.211 | 26.817 | 0.00 | 0.00 | O1- |
| ATOM | 272 | H    | GLU | 16 | 11.361 | 49.661 | 22.385 | 0.00 | 0.00 | H   |
| ATOM | 273 | HA   | GLU | 16 | 10.656 | 51.544 | 24.479 | 0.00 | 0.00 | H   |
| ATOM | 274 | HB2  | GLU | 16 | 9.877  | 49.099 | 24.567 | 0.00 | 0.00 | H   |
| ATOM | 275 | HB3  | GLU | 16 | 11.499 | 48.585 | 25.008 | 0.00 | 0.00 | H   |
| ATOM | 276 | HG2  | GLU | 16 | 11.374 | 50.229 | 26.960 | 0.00 | 0.00 | H   |
| ATOM | 277 | HG3  | GLU | 16 | 9.818  | 50.692 | 26.371 | 0.00 | 0.00 | H   |
| ATOM | 278 | N    | PHE | 17 | 13.816 | 50.595 | 24.351 | 0.00 | 0.00 | N   |
| ATOM | 279 | CA   | PHE | 17 | 15.082 | 51.119 | 24.638 | 0.00 | 0.00 | C   |
| ATOM | 280 | C    | PHE | 17 | 15.318 | 52.450 | 23.876 | 0.00 | 0.00 | C   |
| ATOM | 281 | O    | PHE | 17 | 16.129 | 53.247 | 24.353 | 0.00 | 0.00 | O   |
| ATOM | 282 | CB   | PHE | 17 | 16.138 | 49.984 | 24.326 | 0.00 | 0.00 | C   |
| ATOM | 283 | CG   | PHE | 17 | 17.522 | 50.246 | 24.828 | 0.00 | 0.00 | C   |
| ATOM | 284 | CD1  | PHE | 17 | 17.792 | 49.993 | 26.188 | 0.00 | 0.00 | C   |
| ATOM | 285 | CD2  | PHE | 17 | 18.522 | 50.714 | 23.976 | 0.00 | 0.00 | C   |
| ATOM | 286 | CE1  | PHE | 17 | 18.966 | 50.467 | 26.768 | 0.00 | 0.00 | C   |
| ATOM | 287 | CE2  | PHE | 17 | 19.745 | 51.053 | 24.547 | 0.00 | 0.00 | C   |
| ATOM | 288 | CZ   | PHE | 17 | 19.971 | 50.937 | 25.905 | 0.00 | 0.00 | C   |
| ATOM | 289 | H    | PHE | 17 | 13.685 | 49.955 | 23.581 | 0.00 | 0.00 | H   |
| ATOM | 290 | HA   | PHE | 17 | 15.214 | 51.377 | 25.689 | 0.00 | 0.00 | H   |
| ATOM | 291 | HB2  | PHE | 17 | 15.640 | 49.163 | 24.841 | 0.00 | 0.00 | H   |
| ATOM | 292 | HB3  | PHE | 17 | 16.153 | 49.957 | 23.237 | 0.00 | 0.00 | H   |
| ATOM | 293 | HD1  | PHE | 17 | 17.034 | 49.530 | 26.802 | 0.00 | 0.00 | H   |
| ATOM | 294 | HD2  | PHE | 17 | 18.442 | 50.957 | 22.927 | 0.00 | 0.00 | H   |
| ATOM | 295 | HE1  | PHE | 17 | 19.209 | 50.175 | 27.780 | 0.00 | 0.00 | H   |
| ATOM | 296 | HE2  | PHE | 17 | 20.498 | 51.617 | 24.017 | 0.00 | 0.00 | H   |
| ATOM | 297 | HZ   | PHE | 17 | 20.940 | 51.263 | 26.253 | 0.00 | 0.00 | H   |
| ATOM | 298 | N    | ASN | 18 | 14.625 | 52.794 | 22.744 | 0.00 | 0.00 | N   |
| ATOM | 299 | CA   | ASN | 18 | 14.785 | 54.064 | 22.066 | 0.00 | 0.00 | C   |
| ATOM | 300 | C    | ASN | 18 | 14.345 | 55.257 | 22.916 | 0.00 | 0.00 | C   |
| ATOM | 301 | O    | ASN | 18 | 15.020 | 56.291 | 22.933 | 0.00 | 0.00 | O   |
| ATOM | 302 | CB   | ASN | 18 | 14.173 | 54.005 | 20.643 | 0.00 | 0.00 | C   |
| ATOM | 303 | CG   | ASN | 18 | 14.614 | 55.182 | 19.776 | 0.00 | 0.00 | C   |
| ATOM | 304 | ND2  | ASN | 18 | 13.816 | 55.800 | 18.939 | 0.00 | 0.00 | N   |
| ATOM | 305 | OD1  | ASN | 18 | 15.798 | 55.479 | 19.777 | 0.00 | 0.00 | O   |
| ATOM | 306 | H    | ASN | 18 | 13.924 | 52.147 | 22.414 | 0.00 | 0.00 | H   |
| ATOM | 307 | HA   | ASN | 18 | 15.849 | 54.272 | 21.943 | 0.00 | 0.00 | H   |
| ATOM | 308 | HB2  | ASN | 18 | 14.316 | 53.067 | 20.107 | 0.00 | 0.00 | H   |
| ATOM | 309 | HB3  | ASN | 18 | 13.103 | 54.195 | 20.728 | 0.00 | 0.00 | H   |
| ATOM | 310 | HD21 | ASN | 18 | 14.078 | 56.684 | 18.526 | 0.00 | 0.00 | H   |
| ATOM | 311 | HD22 | ASN | 18 | 12.926 | 55.415 | 18.658 | 0.00 | 0.00 | H   |
| ATOM | 312 | N    | ALA | 19 | 13.278 | 55.068 | 23.679 | 0.00 | 0.00 | N   |
| ATOM | 313 | CA   | ALA | 19 | 12.747 | 55.979 | 24.658 | 0.00 | 0.00 | C   |
| ATOM | 314 | C    | ALA | 19 | 13.852 | 56.176 | 25.760 | 0.00 | 0.00 | C   |
| ATOM | 315 | O    | ALA | 19 | 13.934 | 57.332 | 26.247 | 0.00 | 0.00 | O   |
| ATOM | 316 | CB   | ALA | 19 | 11.412 | 55.510 | 25.202 | 0.00 | 0.00 | C   |
| ATOM | 317 | H    | ALA | 19 | 12.719 | 54.236 | 23.566 | 0.00 | 0.00 | H   |
| ATOM | 318 | HA   | ALA | 19 | 12.699 | 56.939 | 24.144 | 0.00 | 0.00 | H   |
| ATOM | 319 | HB1  | ALA | 19 | 11.570 | 54.633 | 25.831 | 0.00 | 0.00 | H   |
| ATOM | 320 | HB2  | ALA | 19 | 11.007 | 56.281 | 25.858 | 0.00 | 0.00 | H   |
| ATOM | 321 | HB3  | ALA | 19 | 10.662 | 55.176 | 24.486 | 0.00 | 0.00 | H   |
| ATOM | 322 | N    | TYR | 20 | 14.689 | 55.214 | 26.162 | 0.00 | 0.00 | N   |
| ATOM | 323 | CA   | TYR | 20 | 15.721 | 55.316 | 27.187 | 0.00 | 0.00 | C   |
| ATOM | 324 | C    | TYR | 20 | 17.035 | 55.945 | 26.702 | 0.00 | 0.00 | C   |
| ATOM | 325 | O    | TYR | 20 | 17.655 | 56.746 | 27.473 | 0.00 | 0.00 | O   |
| ATOM | 326 | CB   | TYR | 20 | 16.051 | 53.943 | 27.809 | 0.00 | 0.00 | C   |
| ATOM | 327 | CG   | TYR | 20 | 17.099 | 53.925 | 28.974 | 0.00 | 0.00 | C   |
| ATOM | 328 | CD1  | TYR | 20 | 16.728 | 54.396 | 30.213 | 0.00 | 0.00 | C   |
| ATOM | 329 | CD2  | TYR | 20 | 18.333 | 53.499 | 28.616 | 0.00 | 0.00 | C   |
| ATOM | 330 | CE1  | TYR | 20 | 17.744 | 54.238 | 31.203 | 0.00 | 0.00 | C   |
| ATOM | 331 | CE2  | TYR | 20 | 19.382 | 53.396 | 29.532 | 0.00 | 0.00 | C   |
| ATOM | 332 | CZ   | TYR | 20 | 19.058 | 53.759 | 30.868 | 0.00 | 0.00 | C   |
| ATOM | 333 | OH   | TYR | 20 | 20.125 | 53.819 | 31.823 | 0.00 | 0.00 | O   |
| ATOM | 334 | H    | TYR | 20 | 14.621 | 54.393 | 25.578 | 0.00 | 0.00 | H   |



|      |     |      |     |    |        |        |        |      |      |     |
|------|-----|------|-----|----|--------|--------|--------|------|------|-----|
| ATOM | 335 | HA   | TYR | 20 | 15.300 | 55.857 | 28.034 | 0.00 | 0.00 | H   |
| ATOM | 336 | HB2  | TYR | 20 | 15.090 | 53.595 | 28.186 | 0.00 | 0.00 | H   |
| ATOM | 337 | HB3  | TYR | 20 | 16.336 | 53.266 | 27.003 | 0.00 | 0.00 | H   |
| ATOM | 338 | HD1  | TYR | 20 | 15.695 | 54.650 | 30.400 | 0.00 | 0.00 | H   |
| ATOM | 339 | HD2  | TYR | 20 | 18.531 | 53.371 | 27.561 | 0.00 | 0.00 | H   |
| ATOM | 340 | HE1  | TYR | 20 | 17.578 | 54.507 | 32.236 | 0.00 | 0.00 | H   |
| ATOM | 341 | HE2  | TYR | 20 | 20.409 | 53.265 | 29.224 | 0.00 | 0.00 | H   |
| ATOM | 342 | HH   | TYR | 20 | 19.647 | 53.947 | 32.646 | 0.00 | 0.00 | H   |
| ATOM | 343 | N    | TYR | 21 | 17.482 | 55.594 | 25.512 | 0.00 | 0.00 | N   |
| ATOM | 344 | CA   | TYR | 21 | 18.611 | 56.255 | 24.838 | 0.00 | 0.00 | C   |
| ATOM | 345 | C    | TYR | 21 | 18.268 | 57.711 | 24.393 | 0.00 | 0.00 | C   |
| ATOM | 346 | O    | TYR | 21 | 19.196 | 58.503 | 24.385 | 0.00 | 0.00 | O   |
| ATOM | 347 | CB   | TYR | 21 | 18.995 | 55.333 | 23.677 | 0.00 | 0.00 | C   |
| ATOM | 348 | CG   | TYR | 21 | 20.404 | 55.650 | 23.147 | 0.00 | 0.00 | C   |
| ATOM | 349 | CD1  | TYR | 21 | 21.497 | 55.170 | 23.845 | 0.00 | 0.00 | C   |
| ATOM | 350 | CD2  | TYR | 21 | 20.504 | 56.295 | 21.918 | 0.00 | 0.00 | C   |
| ATOM | 351 | CE1  | TYR | 21 | 22.731 | 55.238 | 23.181 | 0.00 | 0.00 | C   |
| ATOM | 352 | CE2  | TYR | 21 | 21.771 | 56.525 | 21.345 | 0.00 | 0.00 | C   |
| ATOM | 353 | CZ   | TYR | 21 | 22.887 | 55.877 | 21.953 | 0.00 | 0.00 | C   |
| ATOM | 354 | OH   | TYR | 21 | 24.075 | 55.752 | 21.341 | 0.00 | 0.00 | O   |
| ATOM | 355 | H    | TYR | 21 | 17.117 | 54.772 | 25.053 | 0.00 | 0.00 | H   |
| ATOM | 356 | HA   | TYR | 21 | 19.428 | 56.236 | 25.560 | 0.00 | 0.00 | H   |
| ATOM | 357 | HB2  | TYR | 21 | 18.979 | 54.294 | 24.007 | 0.00 | 0.00 | H   |
| ATOM | 358 | HB3  | TYR | 21 | 18.270 | 55.451 | 22.871 | 0.00 | 0.00 | H   |
| ATOM | 359 | HD1  | TYR | 21 | 21.416 | 54.698 | 24.813 | 0.00 | 0.00 | H   |
| ATOM | 360 | HD2  | TYR | 21 | 19.627 | 56.607 | 21.369 | 0.00 | 0.00 | H   |
| ATOM | 361 | HE1  | TYR | 21 | 23.602 | 54.907 | 23.727 | 0.00 | 0.00 | H   |
| ATOM | 362 | HE2  | TYR | 21 | 21.880 | 57.005 | 20.383 | 0.00 | 0.00 | H   |
| ATOM | 363 | HH   | TYR | 21 | 24.212 | 56.170 | 20.488 | 0.00 | 0.00 | H   |
| ATOM | 364 | N    | ALA | 22 | 16.991 | 58.106 | 24.166 | 0.00 | 0.00 | N   |
| ATOM | 365 | CA   | ALA | 22 | 16.541 | 59.488 | 23.880 | 0.00 | 0.00 | C   |
| ATOM | 366 | C    | ALA | 22 | 16.760 | 60.414 | 25.089 | 0.00 | 0.00 | C   |
| ATOM | 367 | O    | ALA | 22 | 16.631 | 61.632 | 24.943 | 0.00 | 0.00 | O   |
| ATOM | 368 | CB   | ALA | 22 | 15.064 | 59.385 | 23.399 | 0.00 | 0.00 | C   |
| ATOM | 369 | H    | ALA | 22 | 16.326 | 57.346 | 24.140 | 0.00 | 0.00 | H   |
| ATOM | 370 | HA   | ALA | 22 | 17.115 | 59.825 | 23.016 | 0.00 | 0.00 | H   |
| ATOM | 371 | HB1  | ALA | 22 | 14.444 | 59.088 | 24.245 | 0.00 | 0.00 | H   |
| ATOM | 372 | HB2  | ALA | 22 | 14.684 | 60.366 | 23.112 | 0.00 | 0.00 | H   |
| ATOM | 373 | HB3  | ALA | 22 | 14.820 | 58.703 | 22.584 | 0.00 | 0.00 | H   |
| ATOM | 374 | N    | ARG | 23 | 17.006 | 59.798 | 26.226 | 0.00 | 0.00 | N   |
| ATOM | 375 | CA   | ARG | 23 | 17.323 | 60.492 | 27.477 | 0.00 | 0.00 | C   |
| ATOM | 376 | C    | ARG | 23 | 18.831 | 60.442 | 27.868 | 0.00 | 0.00 | C   |
| ATOM | 377 | O    | ARG | 23 | 19.123 | 61.042 | 28.909 | 0.00 | 0.00 | O   |
| ATOM | 378 | CB   | ARG | 23 | 16.511 | 59.773 | 28.573 | 0.00 | 0.00 | C   |
| ATOM | 379 | CG   | ARG | 23 | 16.101 | 60.687 | 29.713 | 0.00 | 0.00 | C   |
| ATOM | 380 | CD   | ARG | 23 | 14.914 | 60.093 | 30.538 | 0.00 | 0.00 | C   |
| ATOM | 381 | NE   | ARG | 23 | 14.607 | 61.147 | 31.599 | 0.00 | 0.00 | N   |
| ATOM | 382 | CZ   | ARG | 23 | 14.438 | 60.913 | 32.883 | 0.00 | 0.00 | C   |
| ATOM | 383 | NH1  | ARG | 23 | 14.611 | 59.809 | 33.563 | 0.00 | 0.00 | N1+ |
| ATOM | 384 | NH2  | ARG | 23 | 14.099 | 61.856 | 33.693 | 0.00 | 0.00 | N   |
| ATOM | 385 | H    | ARG | 23 | 17.180 | 58.806 | 26.140 | 0.00 | 0.00 | H   |
| ATOM | 386 | HA   | ARG | 23 | 16.920 | 61.503 | 27.422 | 0.00 | 0.00 | H   |
| ATOM | 387 | HB2  | ARG | 23 | 15.702 | 59.309 | 28.009 | 0.00 | 0.00 | H   |
| ATOM | 388 | HB3  | ARG | 23 | 17.128 | 58.974 | 28.984 | 0.00 | 0.00 | H   |
| ATOM | 389 | HG2  | ARG | 23 | 16.928 | 61.062 | 30.316 | 0.00 | 0.00 | H   |
| ATOM | 390 | HG3  | ARG | 23 | 15.774 | 61.634 | 29.282 | 0.00 | 0.00 | H   |
| ATOM | 391 | HD2  | ARG | 23 | 13.994 | 59.899 | 29.987 | 0.00 | 0.00 | H   |
| ATOM | 392 | HD3  | ARG | 23 | 15.215 | 59.140 | 30.974 | 0.00 | 0.00 | H   |
| ATOM | 393 | HE   | ARG | 23 | 14.514 | 62.083 | 31.231 | 0.00 | 0.00 | H   |
| ATOM | 394 | HH11 | ARG | 23 | 15.048 | 59.008 | 33.132 | 0.00 | 0.00 | H   |
| ATOM | 395 | HH12 | ARG | 23 | 14.554 | 59.937 | 34.564 | 0.00 | 0.00 | H   |
| ATOM | 396 | HH21 | ARG | 23 | 14.080 | 62.785 | 33.295 | 0.00 | 0.00 | H   |
| ATOM | 397 | HH22 | ARG | 23 | 14.146 | 61.770 | 34.699 | 0.00 | 0.00 | H   |
| ATOM | 398 | N    | ARG | 24 | 19.758 | 59.896 | 27.025 | 0.00 | 0.00 | N   |
| ATOM | 399 | CA   | ARG | 24 | 21.242 | 59.923 | 27.167 | 0.00 | 0.00 | C   |
| ATOM | 400 | C    | ARG | 24 | 21.805 | 61.319 | 27.509 | 0.00 | 0.00 | C   |
| ATOM | 401 | O    | ARG | 24 | 21.799 | 62.285 | 26.748 | 0.00 | 0.00 | O   |
| ATOM | 402 | CB   | ARG | 24 | 21.812 | 59.231 | 25.912 | 0.00 | 0.00 | C   |
| ATOM | 403 | CG   | ARG | 24 | 23.330 | 58.906 | 26.045 | 0.00 | 0.00 | C   |
| ATOM | 404 | CD   | ARG | 24 | 23.549 | 58.120 | 24.734 | 0.00 | 0.00 | C   |
| ATOM | 405 | NE   | ARG | 24 | 24.925 | 57.770 | 24.561 | 0.00 | 0.00 | N   |
| ATOM | 406 | CZ   | ARG | 24 | 25.780 | 57.855 | 23.564 | 0.00 | 0.00 | C   |
| ATOM | 407 | NH1  | ARG | 24 | 25.573 | 58.405 | 22.397 | 0.00 | 0.00 | N1+ |
| ATOM | 408 | NH2  | ARG | 24 | 26.894 | 57.163 | 23.665 | 0.00 | 0.00 | N   |
| ATOM | 409 | H    | ARG | 24 | 19.320 | 59.507 | 26.202 | 0.00 | 0.00 | H   |
| ATOM | 410 | HA   | ARG | 24 | 21.344 | 59.336 | 28.079 | 0.00 | 0.00 | H   |
| ATOM | 411 | HB2  | ARG | 24 | 21.628 | 59.821 | 25.013 | 0.00 | 0.00 | H   |
| ATOM | 412 | HB3  | ARG | 24 | 21.277 | 58.282 | 25.933 | 0.00 | 0.00 | H   |
| ATOM | 413 | HG2  | ARG | 24 | 23.645 | 58.307 | 26.899 | 0.00 | 0.00 | H   |
| ATOM | 414 | HG3  | ARG | 24 | 23.909 | 59.829 | 25.992 | 0.00 | 0.00 | H   |
| ATOM | 415 | HD2  | ARG | 24 | 23.314 | 58.718 | 23.854 | 0.00 | 0.00 | H   |
| ATOM | 416 | HD3  | ARG | 24 | 22.824 | 57.310 | 24.642 | 0.00 | 0.00 | H   |
| ATOM | 417 | HE   | ARG | 24 | 25.267 | 57.265 | 25.366 | 0.00 | 0.00 | H   |
| ATOM | 418 | HH11 | ARG | 24 | 24.757 | 58.985 | 22.271 | 0.00 | 0.00 | H   |
| ATOM | 419 | HH12 | ARG | 24 | 25.972 | 57.937 | 21.595 | 0.00 | 0.00 | H   |
| ATOM | 420 | HH21 | ARG | 24 | 27.038 | 56.612 | 24.499 | 0.00 | 0.00 | H   |
| ATOM | 421 | HH22 | ARG | 24 | 27.484 | 57.039 | 22.854 | 0.00 | 0.00 | H   |
| TER  |     |      |     |    |        |        |        |      |      |     |
| MOL2 |     |      |     |    |        |        |        |      |      |     |
| ATOM | 422 | N    | SER | 25 | 33.502 | 55.486 | 6.845  | 0.00 | 0.00 | N   |
| ATOM | 423 | CA   | SER | 25 | 32.545 | 56.428 | 7.446  | 0.00 | 0.00 | C   |
| ATOM | 424 | C    | SER | 25 | 31.756 | 57.210 | 6.412  | 0.00 | 0.00 | C   |
| ATOM | 425 | O    | SER | 25 | 30.822 | 57.825 | 6.805  | 0.00 | 0.00 | O   |
| ATOM | 426 | CB   | SER | 25 | 33.200 | 57.224 | 8.556  | 0.00 | 0.00 | C   |
| ATOM | 427 | OG   | SER | 25 | 33.737 | 56.368 | 9.472  | 0.00 | 0.00 | O   |
| ATOM | 428 | H    | SER | 25 | 34.438 | 55.374 | 7.210  | 0.00 | 0.00 | H   |
| ATOM | 429 | HA   | SER | 25 | 31.746 | 55.779 | 7.805  | 0.00 | 0.00 | H   |
| ATOM | 430 | HB2  | SER | 25 | 33.985 | 57.855 | 8.141  | 0.00 | 0.00 | H   |
| ATOM | 431 | HB3  | SER | 25 | 32.528 | 57.890 | 9.097  | 0.00 | 0.00 | H   |
| ATOM | 432 | HG   | SER | 25 | 34.643 | 56.373 | 9.152  | 0.00 | 0.00 | H   |
| ATOM | 433 | N    | ALA | 26 | 32.205 | 57.248 | 5.158  | 0.00 | 0.00 | N   |
| ATOM | 434 | CA   | ALA | 26 | 31.518 | 58.036 | 4.092  | 0.00 | 0.00 | C   |
| ATOM | 435 | C    | ALA | 26 | 30.350 | 57.352 | 3.422  | 0.00 | 0.00 | C   |
| ATOM | 436 | O    | ALA | 26 | 29.283 | 57.913 | 3.158  | 0.00 | 0.00 | O   |
| ATOM | 437 | CB   | ALA | 26 | 32.569 | 58.337 | 2.995  | 0.00 | 0.00 | C   |

|      |     |      |     |    |        |        |        |      |      |     |
|------|-----|------|-----|----|--------|--------|--------|------|------|-----|
| ATOM | 438 | H    | ALA | 26 | 33.085 | 56.788 | 4.972  | 0.00 | 0.00 | H   |
| ATOM | 439 | HA   | ALA | 26 | 31.200 | 58.998 | 4.494  | 0.00 | 0.00 | H   |
| ATOM | 440 | HB1  | ALA | 26 | 33.538 | 58.550 | 3.448  | 0.00 | 0.00 | H   |
| ATOM | 441 | HB2  | ALA | 26 | 32.711 | 57.493 | 2.319  | 0.00 | 0.00 | H   |
| ATOM | 442 | HB3  | ALA | 26 | 32.195 | 59.171 | 2.402  | 0.00 | 0.00 | H   |
| ATOM | 443 | N    | SER | 27 | 30.471 | 56.024 | 3.276  | 0.00 | 0.00 | N   |
| ATOM | 444 | CA   | SER | 27 | 29.533 | 55.144 | 2.575  | 0.00 | 0.00 | C   |
| ATOM | 445 | C    | SER | 27 | 29.205 | 54.052 | 3.554  | 0.00 | 0.00 | C   |
| ATOM | 446 | O    | SER | 27 | 29.946 | 53.603 | 4.463  | 0.00 | 0.00 | O   |
| ATOM | 447 | CB   | SER | 27 | 30.022 | 54.634 | 1.236  | 0.00 | 0.00 | C   |
| ATOM | 448 | OG   | SER | 27 | 31.103 | 53.784 | 1.334  | 0.00 | 0.00 | O   |
| ATOM | 449 | H    | SER | 27 | 31.220 | 55.519 | 3.728  | 0.00 | 0.00 | H   |
| ATOM | 450 | HA   | SER | 27 | 28.655 | 55.752 | 2.360  | 0.00 | 0.00 | H   |
| ATOM | 451 | HB2  | SER | 27 | 29.219 | 54.102 | 0.726  | 0.00 | 0.00 | H   |
| ATOM | 452 | HB3  | SER | 27 | 30.380 | 55.502 | 0.682  | 0.00 | 0.00 | H   |
| ATOM | 453 | HG   | SER | 27 | 31.500 | 53.708 | 0.463  | 0.00 | 0.00 | H   |
| ATOM | 454 | N    | GLU | 28 | 28.075 | 53.366 | 3.285  | 0.00 | 0.00 | N   |
| ATOM | 455 | CA   | GLU | 28 | 27.755 | 52.039 | 3.820  | 0.00 | 0.00 | C   |
| ATOM | 456 | C    | GLU | 28 | 28.835 | 50.913 | 3.577  | 0.00 | 0.00 | C   |
| ATOM | 457 | O    | GLU | 28 | 29.073 | 50.157 | 4.471  | 0.00 | 0.00 | O   |
| ATOM | 458 | CB   | GLU | 28 | 26.357 | 51.633 | 3.385  | 0.00 | 0.00 | C   |
| ATOM | 459 | CG   | GLU | 28 | 26.363 | 51.329 | 1.842  | 0.00 | 0.00 | C   |
| ATOM | 460 | CD   | GLU | 28 | 24.982 | 51.557 | 1.169  | 0.00 | 0.00 | C   |
| ATOM | 461 | OE1  | GLU | 28 | 24.149 | 50.651 | 1.285  | 0.00 | 0.00 | O   |
| ATOM | 462 | OE2  | GLU | 28 | 24.800 | 52.653 | 0.518  | 0.00 | 0.00 | O1- |
| ATOM | 463 | H    | GLU | 28 | 27.354 | 53.836 | 2.756  | 0.00 | 0.00 | H   |
| ATOM | 464 | HA   | GLU | 28 | 27.656 | 52.130 | 4.901  | 0.00 | 0.00 | H   |
| ATOM | 465 | HB2  | GLU | 28 | 26.143 | 50.800 | 4.056  | 0.00 | 0.00 | H   |
| ATOM | 466 | HB3  | GLU | 28 | 25.789 | 52.550 | 3.546  | 0.00 | 0.00 | H   |
| ATOM | 467 | HG2  | GLU | 28 | 27.126 | 51.904 | 1.319  | 0.00 | 0.00 | H   |
| ATOM | 468 | HG3  | GLU | 28 | 26.622 | 50.282 | 1.681  | 0.00 | 0.00 | H   |
| ATOM | 469 | N    | GLU | 29 | 29.507 | 50.970 | 2.420  | 0.00 | 0.00 | N   |
| ATOM | 470 | CA   | GLU | 29 | 30.634 | 50.075 | 2.099  | 0.00 | 0.00 | C   |
| ATOM | 471 | C    | GLU | 29 | 31.845 | 50.399 | 2.923  | 0.00 | 0.00 | C   |
| ATOM | 472 | O    | GLU | 29 | 32.676 | 49.511 | 3.165  | 0.00 | 0.00 | O   |
| ATOM | 473 | CB   | GLU | 29 | 30.915 | 49.963 | 0.565  | 0.00 | 0.00 | C   |
| ATOM | 474 | CG   | GLU | 29 | 29.618 | 49.487 | -0.130 | 0.00 | 0.00 | C   |
| ATOM | 475 | CD   | GLU | 29 | 29.750 | 49.363 | -1.681 | 0.00 | 0.00 | C   |
| ATOM | 476 | OE1  | GLU | 29 | 28.924 | 49.998 | -2.422 | 0.00 | 0.00 | O   |
| ATOM | 477 | OE2  | GLU | 29 | 30.685 | 48.659 | -2.119 | 0.00 | 0.00 | O1- |
| ATOM | 478 | H    | GLU | 29 | 29.339 | 51.677 | 1.719  | 0.00 | 0.00 | H   |
| ATOM | 479 | HA   | GLU | 29 | 30.235 | 49.108 | 2.404  | 0.00 | 0.00 | H   |
| ATOM | 480 | HB2  | GLU | 29 | 31.343 | 50.917 | 0.256  | 0.00 | 0.00 | H   |
| ATOM | 481 | HB3  | GLU | 29 | 31.687 | 49.233 | 0.323  | 0.00 | 0.00 | H   |
| ATOM | 482 | HG2  | GLU | 29 | 29.277 | 48.574 | 0.359  | 0.00 | 0.00 | H   |
| ATOM | 483 | HG3  | GLU | 29 | 28.847 | 50.228 | 0.083  | 0.00 | 0.00 | H   |
| ATOM | 484 | N    | GLN | 30 | 32.088 | 51.686 | 3.333  | 0.00 | 0.00 | N   |
| ATOM | 485 | CA   | GLN | 30 | 33.188 | 52.030 | 4.283  | 0.00 | 0.00 | C   |
| ATOM | 486 | C    | GLN | 30 | 32.775 | 51.649 | 5.714  | 0.00 | 0.00 | C   |
| ATOM | 487 | O    | GLN | 30 | 33.629 | 51.217 | 6.477  | 0.00 | 0.00 | O   |
| ATOM | 488 | CB   | GLN | 30 | 33.549 | 53.503 | 4.210  | 0.00 | 0.00 | C   |
| ATOM | 489 | CG   | GLN | 30 | 34.233 | 53.996 | 2.963  | 0.00 | 0.00 | C   |
| ATOM | 490 | CD   | GLN | 30 | 34.665 | 55.419 | 2.970  | 0.00 | 0.00 | C   |
| ATOM | 491 | NE2  | GLN | 30 | 35.281 | 55.831 | 1.911  | 0.00 | 0.00 | N   |
| ATOM | 492 | OE1  | GLN | 30 | 34.605 | 56.127 | 3.991  | 0.00 | 0.00 | O   |
| ATOM | 493 | H    | GLN | 30 | 31.485 | 52.431 | 3.019  | 0.00 | 0.00 | H   |
| ATOM | 494 | HA   | GLN | 30 | 34.117 | 51.496 | 4.085  | 0.00 | 0.00 | H   |
| ATOM | 495 | HB2  | GLN | 30 | 32.605 | 54.037 | 4.307  | 0.00 | 0.00 | H   |
| ATOM | 496 | HB3  | GLN | 30 | 34.327 | 53.701 | 4.948  | 0.00 | 0.00 | H   |
| ATOM | 497 | HG2  | GLN | 30 | 35.185 | 53.496 | 2.791  | 0.00 | 0.00 | H   |
| ATOM | 498 | HG3  | GLN | 30 | 33.650 | 53.784 | 2.067  | 0.00 | 0.00 | H   |
| ATOM | 499 | HE21 | GLN | 30 | 35.688 | 56.754 | 1.851  | 0.00 | 0.00 | H   |
| ATOM | 500 | HE22 | GLN | 30 | 35.389 | 55.088 | 1.236  | 0.00 | 0.00 | H   |
| ATOM | 501 | N    | VAL | 31 | 31.522 | 51.889 | 6.084  | 0.00 | 0.00 | N   |
| ATOM | 502 | CA   | VAL | 31 | 30.944 | 51.572 | 7.459  | 0.00 | 0.00 | C   |
| ATOM | 503 | C    | VAL | 31 | 30.999 | 50.073 | 7.725  | 0.00 | 0.00 | C   |
| ATOM | 504 | O    | VAL | 31 | 31.172 | 49.697 | 8.859  | 0.00 | 0.00 | O   |
| ATOM | 505 | CB   | VAL | 31 | 29.497 | 52.158 | 7.753  | 0.00 | 0.00 | C   |
| ATOM | 506 | CG1  | VAL | 31 | 28.694 | 51.521 | 8.872  | 0.00 | 0.00 | C   |
| ATOM | 507 | CG2  | VAL | 31 | 29.615 | 53.590 | 8.239  | 0.00 | 0.00 | C   |
| ATOM | 508 | H    | VAL | 31 | 30.891 | 52.359 | 5.450  | 0.00 | 0.00 | H   |
| ATOM | 509 | HA   | VAL | 31 | 31.623 | 52.070 | 8.150  | 0.00 | 0.00 | H   |
| ATOM | 510 | HB   | VAL | 31 | 28.846 | 52.046 | 6.886  | 0.00 | 0.00 | H   |
| ATOM | 511 | HG11 | VAL | 31 | 28.552 | 50.469 | 8.625  | 0.00 | 0.00 | H   |
| ATOM | 512 | HG12 | VAL | 31 | 29.267 | 51.483 | 9.798  | 0.00 | 0.00 | H   |
| ATOM | 513 | HG13 | VAL | 31 | 27.747 | 52.024 | 9.068  | 0.00 | 0.00 | H   |
| ATOM | 514 | HG21 | VAL | 31 | 30.140 | 54.090 | 7.426  | 0.00 | 0.00 | H   |
| ATOM | 515 | HG22 | VAL | 31 | 28.689 | 54.112 | 8.484  | 0.00 | 0.00 | H   |
| ATOM | 516 | HG23 | VAL | 31 | 30.283 | 53.679 | 9.097  | 0.00 | 0.00 | H   |
| ATOM | 517 | N    | ALA | 32 | 30.984 | 49.238 | 6.671  | 0.00 | 0.00 | N   |
| ATOM | 518 | CA   | ALA | 32 | 31.141 | 47.783 | 6.714  | 0.00 | 0.00 | C   |
| ATOM | 519 | C    | ALA | 32 | 32.507 | 47.365 | 7.234  | 0.00 | 0.00 | C   |
| ATOM | 520 | O    | ALA | 32 | 32.637 | 46.501 | 8.117  | 0.00 | 0.00 | O   |
| ATOM | 521 | CB   | ALA | 32 | 30.678 | 47.039 | 5.460  | 0.00 | 0.00 | C   |
| ATOM | 522 | H    | ALA | 32 | 30.683 | 49.662 | 5.806  | 0.00 | 0.00 | H   |
| ATOM | 523 | HA   | ALA | 32 | 30.464 | 47.343 | 7.446  | 0.00 | 0.00 | H   |
| ATOM | 524 | HB1  | ALA | 32 | 30.600 | 45.964 | 5.623  | 0.00 | 0.00 | H   |
| ATOM | 525 | HB2  | ALA | 32 | 29.675 | 47.305 | 5.129  | 0.00 | 0.00 | H   |
| ATOM | 526 | HB3  | ALA | 32 | 31.312 | 47.175 | 4.582  | 0.00 | 0.00 | H   |
| ATOM | 527 | N    | GLN | 33 | 33.576 | 48.088 | 6.774  | 0.00 | 0.00 | N   |
| ATOM | 528 | CA   | GLN | 33 | 34.956 | 47.771 | 7.192  | 0.00 | 0.00 | C   |
| ATOM | 529 | C    | GLN | 33 | 35.214 | 48.165 | 8.644  | 0.00 | 0.00 | C   |
| ATOM | 530 | O    | GLN | 33 | 36.126 | 47.644 | 9.289  | 0.00 | 0.00 | O   |
| ATOM | 531 | CB   | GLN | 33 | 35.962 | 48.436 | 6.224  | 0.00 | 0.00 | C   |
| ATOM | 532 | CG   | GLN | 33 | 35.752 | 47.919 | 4.743  | 0.00 | 0.00 | C   |
| ATOM | 533 | CD   | GLN | 33 | 36.709 | 48.374 | 3.745  | 0.00 | 0.00 | C   |
| ATOM | 534 | NE2  | GLN | 33 | 37.728 | 47.618 | 3.528  | 0.00 | 0.00 | N   |
| ATOM | 535 | OE1  | GLN | 33 | 36.545 | 49.420 | 3.149  | 0.00 | 0.00 | O   |
| ATOM | 536 | H    | GLN | 33 | 33.455 | 48.954 | 6.268  | 0.00 | 0.00 | H   |
| ATOM | 537 | HA   | GLN | 33 | 34.998 | 46.683 | 7.152  | 0.00 | 0.00 | H   |
| ATOM | 538 | HB2  | GLN | 33 | 35.961 | 49.525 | 6.287  | 0.00 | 0.00 | H   |
| ATOM | 539 | HB3  | GLN | 33 | 36.979 | 48.140 | 6.484  | 0.00 | 0.00 | H   |
| ATOM | 540 | HG2  | GLN | 33 | 35.875 | 46.838 | 4.807  | 0.00 | 0.00 | H   |
| ATOM | 541 | HG3  | GLN | 33 | 34.764 | 48.223 | 4.394  | 0.00 | 0.00 | H   |
| ATOM | 542 | HE21 | GLN | 33 | 38.063 | 46.876 | 4.126  | 0.00 | 0.00 | H   |

|      |     |      |     |    |        |        |        |      |      |     |
|------|-----|------|-----|----|--------|--------|--------|------|------|-----|
| ATOM | 543 | HE22 | GLN | 33 | 38.499 | 48.194 | 3.221  | 0.00 | 0.00 | H   |
| ATOM | 544 | N    | ASP | 34 | 34.350 | 48.949 | 9.261  | 0.00 | 0.00 | N   |
| ATOM | 545 | CA   | ASP | 34 | 34.460 | 49.277 | 10.713 | 0.00 | 0.00 | C   |
| ATOM | 546 | C    | ASP | 34 | 33.448 | 48.471 | 11.567 | 0.00 | 0.00 | C   |
| ATOM | 547 | O    | ASP | 34 | 33.847 | 48.062 | 12.645 | 0.00 | 0.00 | O   |
| ATOM | 548 | CB   | ASP | 34 | 34.175 | 50.712 | 11.013 | 0.00 | 0.00 | C   |
| ATOM | 549 | CG   | ASP | 34 | 35.252 | 51.624 | 10.495 | 0.00 | 0.00 | C   |
| ATOM | 550 | OD1  | ASP | 34 | 34.998 | 52.514 | 9.667  | 0.00 | 0.00 | O   |
| ATOM | 551 | OD2  | ASP | 34 | 36.450 | 51.482 | 10.869 | 0.00 | 0.00 | O1- |
| ATOM | 552 | H    | ASP | 34 | 33.644 | 49.390 | 8.690  | 0.00 | 0.00 | H   |
| ATOM | 553 | HA   | ASP | 34 | 35.433 | 49.097 | 11.171 | 0.00 | 0.00 | H   |
| ATOM | 554 | HB2  | ASP | 34 | 33.222 | 50.956 | 10.544 | 0.00 | 0.00 | H   |
| ATOM | 555 | HB3  | ASP | 34 | 34.018 | 50.875 | 12.079 | 0.00 | 0.00 | H   |
| ATOM | 556 | N    | THR | 35 | 32.295 | 48.012 | 11.111 | 0.00 | 0.00 | N   |
| ATOM | 557 | CA   | THR | 35 | 31.356 | 47.122 | 11.812 | 0.00 | 0.00 | C   |
| ATOM | 558 | C    | THR | 35 | 31.951 | 45.822 | 12.241 | 0.00 | 0.00 | C   |
| ATOM | 559 | O    | THR | 35 | 31.658 | 45.380 | 13.315 | 0.00 | 0.00 | O   |
| ATOM | 560 | CB   | THR | 35 | 29.983 | 46.921 | 11.060 | 0.00 | 0.00 | C   |
| ATOM | 561 | CG2  | THR | 35 | 28.766 | 46.718 | 11.891 | 0.00 | 0.00 | C   |
| ATOM | 562 | OG1  | THR | 35 | 29.602 | 48.163 | 10.507 | 0.00 | 0.00 | O   |
| ATOM | 563 | H    | THR | 35 | 31.966 | 48.397 | 10.238 | 0.00 | 0.00 | H   |
| ATOM | 564 | HA   | THR | 35 | 31.144 | 47.625 | 12.756 | 0.00 | 0.00 | H   |
| ATOM | 565 | HB   | THR | 35 | 30.106 | 46.165 | 10.285 | 0.00 | 0.00 | H   |
| ATOM | 566 | HG1  | THR | 35 | 30.233 | 48.701 | 10.024 | 0.00 | 0.00 | H   |
| ATOM | 567 | HG21 | THR | 35 | 27.848 | 46.798 | 11.310 | 0.00 | 0.00 | H   |
| ATOM | 568 | HG22 | THR | 35 | 28.763 | 45.732 | 12.357 | 0.00 | 0.00 | H   |
| ATOM | 569 | HG23 | THR | 35 | 28.617 | 47.451 | 12.683 | 0.00 | 0.00 | H   |
| ATOM | 570 | N    | GLU | 36 | 32.831 | 45.190 | 11.461 | 0.00 | 0.00 | N   |
| ATOM | 571 | CA   | GLU | 36 | 33.565 | 44.020 | 11.979 | 0.00 | 0.00 | C   |
| ATOM | 572 | C    | GLU | 36 | 34.533 | 44.301 | 13.148 | 0.00 | 0.00 | C   |
| ATOM | 573 | O    | GLU | 36 | 34.605 | 43.508 | 14.088 | 0.00 | 0.00 | O   |
| ATOM | 574 | CB   | GLU | 36 | 34.201 | 43.281 | 10.757 | 0.00 | 0.00 | C   |
| ATOM | 575 | CG   | GLU | 36 | 35.253 | 44.136 | 9.991  | 0.00 | 0.00 | C   |
| ATOM | 576 | CD   | GLU | 36 | 35.595 | 43.291 | 8.803  | 0.00 | 0.00 | C   |
| ATOM | 577 | OE1  | GLU | 36 | 35.007 | 43.518 | 7.710  | 0.00 | 0.00 | O   |
| ATOM | 578 | OE2  | GLU | 36 | 36.407 | 42.336 | 9.011  | 0.00 | 0.00 | O1- |
| ATOM | 579 | H    | GLU | 36 | 33.307 | 45.679 | 10.717 | 0.00 | 0.00 | H   |
| ATOM | 580 | HA   | GLU | 36 | 32.872 | 43.276 | 12.373 | 0.00 | 0.00 | H   |
| ATOM | 581 | HB2  | GLU | 36 | 34.624 | 42.360 | 11.157 | 0.00 | 0.00 | H   |
| ATOM | 582 | HB3  | GLU | 36 | 33.405 | 42.926 | 10.103 | 0.00 | 0.00 | H   |
| ATOM | 583 | HG2  | GLU | 36 | 34.916 | 45.130 | 9.695  | 0.00 | 0.00 | H   |
| ATOM | 584 | HG3  | GLU | 36 | 36.129 | 44.202 | 10.636 | 0.00 | 0.00 | H   |
| ATOM | 585 | N    | GLU | 37 | 35.096 | 45.500 | 13.210 | 0.00 | 0.00 | N   |
| ATOM | 586 | CA   | GLU | 37 | 36.031 | 45.845 | 14.271 | 0.00 | 0.00 | C   |
| ATOM | 587 | C    | GLU | 37 | 35.307 | 46.363 | 15.498 | 0.00 | 0.00 | C   |
| ATOM | 588 | O    | GLU | 37 | 35.620 | 45.967 | 16.567 | 0.00 | 0.00 | O   |
| ATOM | 589 | CB   | GLU | 37 | 36.958 | 46.910 | 13.815 | 0.00 | 0.00 | C   |
| ATOM | 590 | CG   | GLU | 37 | 38.045 | 47.318 | 14.853 | 0.00 | 0.00 | C   |
| ATOM | 591 | CD   | GLU | 37 | 39.353 | 46.648 | 14.598 | 0.00 | 0.00 | C   |
| ATOM | 592 | OE1  | GLU | 37 | 40.222 | 47.112 | 13.811 | 0.00 | 0.00 | O   |
| ATOM | 593 | OE2  | GLU | 37 | 39.511 | 45.454 | 14.972 | 0.00 | 0.00 | O1- |
| ATOM | 594 | H    | GLU | 37 | 34.768 | 46.276 | 12.653 | 0.00 | 0.00 | H   |
| ATOM | 595 | HA   | GLU | 37 | 36.696 | 44.996 | 14.424 | 0.00 | 0.00 | H   |
| ATOM | 596 | HB2  | GLU | 37 | 37.392 | 46.563 | 12.878 | 0.00 | 0.00 | H   |
| ATOM | 597 | HB3  | GLU | 37 | 36.375 | 47.805 | 13.604 | 0.00 | 0.00 | H   |
| ATOM | 598 | HG2  | GLU | 37 | 38.330 | 48.366 | 14.759 | 0.00 | 0.00 | H   |
| ATOM | 599 | HG3  | GLU | 37 | 37.685 | 47.183 | 15.872 | 0.00 | 0.00 | H   |
| ATOM | 600 | N    | VAL | 38 | 34.299 | 47.218 | 15.348 | 0.00 | 0.00 | N   |
| ATOM | 601 | CA   | VAL | 38 | 33.306 | 47.612 | 16.379 | 0.00 | 0.00 | C   |
| ATOM | 602 | C    | VAL | 38 | 32.647 | 46.292 | 16.911 | 0.00 | 0.00 | C   |
| ATOM | 603 | O    | VAL | 38 | 32.626 | 46.079 | 18.077 | 0.00 | 0.00 | O   |
| ATOM | 604 | CB   | VAL | 38 | 32.247 | 48.689 | 15.955 | 0.00 | 0.00 | C   |
| ATOM | 605 | CG1  | VAL | 38 | 31.456 | 49.157 | 17.122 | 0.00 | 0.00 | C   |
| ATOM | 606 | CG2  | VAL | 38 | 32.976 | 49.890 | 15.362 | 0.00 | 0.00 | C   |
| ATOM | 607 | H    | VAL | 38 | 34.056 | 47.580 | 14.437 | 0.00 | 0.00 | H   |
| ATOM | 608 | HA   | VAL | 38 | 33.842 | 48.047 | 17.223 | 0.00 | 0.00 | H   |
| ATOM | 609 | HB   | VAL | 38 | 31.662 | 48.267 | 15.138 | 0.00 | 0.00 | H   |
| ATOM | 610 | HG11 | VAL | 38 | 30.710 | 49.875 | 16.784 | 0.00 | 0.00 | H   |
| ATOM | 611 | HG12 | VAL | 38 | 31.013 | 48.270 | 17.576 | 0.00 | 0.00 | H   |
| ATOM | 612 | HG13 | VAL | 38 | 32.123 | 49.580 | 17.874 | 0.00 | 0.00 | H   |
| ATOM | 613 | HG21 | VAL | 38 | 33.745 | 50.360 | 15.975 | 0.00 | 0.00 | H   |
| ATOM | 614 | HG22 | VAL | 38 | 33.527 | 49.601 | 14.467 | 0.00 | 0.00 | H   |
| ATOM | 615 | HG23 | VAL | 38 | 32.235 | 50.610 | 15.013 | 0.00 | 0.00 | H   |
| ATOM | 616 | N    | PHE | 39 | 32.188 | 45.348 | 16.084 | 0.00 | 0.00 | N   |
| ATOM | 617 | CA   | PHE | 39 | 31.464 | 44.151 | 16.549 | 0.00 | 0.00 | C   |
| ATOM | 618 | C    | PHE | 39 | 32.412 | 43.194 | 17.361 | 0.00 | 0.00 | C   |
| ATOM | 619 | O    | PHE | 39 | 32.176 | 42.799 | 18.497 | 0.00 | 0.00 | O   |
| ATOM | 620 | CB   | PHE | 39 | 30.752 | 43.353 | 15.452 | 0.00 | 0.00 | C   |
| ATOM | 621 | CG   | PHE | 39 | 29.915 | 42.238 | 16.049 | 0.00 | 0.00 | C   |
| ATOM | 622 | CD1  | PHE | 39 | 28.584 | 42.465 | 16.441 | 0.00 | 0.00 | C   |
| ATOM | 623 | CD2  | PHE | 39 | 30.392 | 40.906 | 15.984 | 0.00 | 0.00 | C   |
| ATOM | 624 | CE1  | PHE | 39 | 27.789 | 41.387 | 16.757 | 0.00 | 0.00 | C   |
| ATOM | 625 | CE2  | PHE | 39 | 29.642 | 39.778 | 16.326 | 0.00 | 0.00 | C   |
| ATOM | 626 | CZ   | PHE | 39 | 28.278 | 40.051 | 16.600 | 0.00 | 0.00 | C   |
| ATOM | 627 | H    | PHE | 39 | 32.251 | 45.540 | 15.095 | 0.00 | 0.00 | H   |
| ATOM | 628 | HA   | PHE | 39 | 30.803 | 44.474 | 17.352 | 0.00 | 0.00 | H   |
| ATOM | 629 | HB2  | PHE | 39 | 30.068 | 44.047 | 14.964 | 0.00 | 0.00 | H   |
| ATOM | 630 | HB3  | PHE | 39 | 31.528 | 42.975 | 14.786 | 0.00 | 0.00 | H   |
| ATOM | 631 | HD1  | PHE | 39 | 28.157 | 43.454 | 16.530 | 0.00 | 0.00 | H   |
| ATOM | 632 | HD2  | PHE | 39 | 31.439 | 40.769 | 15.753 | 0.00 | 0.00 | H   |
| ATOM | 633 | HE1  | PHE | 39 | 26.775 | 41.610 | 17.052 | 0.00 | 0.00 | H   |
| ATOM | 634 | HE2  | PHE | 39 | 30.087 | 38.797 | 16.397 | 0.00 | 0.00 | H   |
| ATOM | 635 | HZ   | PHE | 39 | 27.625 | 39.240 | 16.887 | 0.00 | 0.00 | H   |
| ATOM | 636 | N    | ARG | 40 | 33.648 | 42.918 | 16.848 | 0.00 | 0.00 | N   |
| ATOM | 637 | CA   | ARG | 40 | 34.639 | 42.086 | 17.611 | 0.00 | 0.00 | C   |
| ATOM | 638 | C    | ARG | 40 | 35.046 | 42.765 | 18.923 | 0.00 | 0.00 | C   |
| ATOM | 639 | O    | ARG | 40 | 35.155 | 42.009 | 19.904 | 0.00 | 0.00 | O   |
| ATOM | 640 | CB   | ARG | 40 | 35.812 | 41.740 | 16.722 | 0.00 | 0.00 | C   |
| ATOM | 641 | CG   | ARG | 40 | 35.528 | 40.618 | 15.755 | 0.00 | 0.00 | C   |
| ATOM | 642 | CD   | ARG | 40 | 36.827 | 40.342 | 14.970 | 0.00 | 0.00 | C   |
| ATOM | 643 | NE   | ARG | 40 | 37.121 | 41.134 | 13.815 | 0.00 | 0.00 | N   |
| ATOM | 644 | CZ   | ARG | 40 | 37.908 | 42.211 | 13.577 | 0.00 | 0.00 | C   |
| ATOM | 645 | NH1  | ARG | 40 | 38.495 | 42.732 | 14.608 | 0.00 | 0.00 | N1+ |
| ATOM | 646 | NH2  | ARG | 40 | 38.042 | 42.736 | 12.381 | 0.00 | 0.00 | N   |
| ATOM | 647 | H    | ARG | 40 | 33.878 | 43.432 | 16.009 | 0.00 | 0.00 | H   |

|      |     |      |     |    |        |        |        |      |      |   |
|------|-----|------|-----|----|--------|--------|--------|------|------|---|
| ATOM | 648 | HA   | ARG | 40 | 34.126 | 41.167 | 17.891 | 0.00 | 0.00 | H |
| ATOM | 649 | HB2  | ARG | 40 | 36.229 | 42.654 | 16.300 | 0.00 | 0.00 | H |
| ATOM | 650 | HB3  | ARG | 40 | 36.478 | 41.316 | 17.472 | 0.00 | 0.00 | H |
| ATOM | 651 | HG2  | ARG | 40 | 35.244 | 39.721 | 16.305 | 0.00 | 0.00 | H |
| ATOM | 652 | HG3  | ARG | 40 | 34.657 | 40.825 | 15.135 | 0.00 | 0.00 | H |
| ATOM | 653 | HD2  | ARG | 40 | 37.714 | 40.303 | 15.601 | 0.00 | 0.00 | H |
| ATOM | 654 | HD3  | ARG | 40 | 36.746 | 39.314 | 14.615 | 0.00 | 0.00 | H |
| ATOM | 655 | HE   | ARG | 40 | 36.853 | 40.749 | 12.921 | 0.00 | 0.00 | H |
| ATOM | 656 | HH11 | ARG | 40 | 38.679 | 42.075 | 15.352 | 0.00 | 0.00 | H |
| ATOM | 657 | HH12 | ARG | 40 | 39.031 | 43.587 | 14.551 | 0.00 | 0.00 | H |
| ATOM | 658 | HH21 | ARG | 40 | 37.455 | 42.436 | 11.617 | 0.00 | 0.00 | H |
| ATOM | 659 | HH22 | ARG | 40 | 38.822 | 43.365 | 12.255 | 0.00 | 0.00 | H |
| ATOM | 660 | N    | SER | 41 | 35.210 | 44.049 | 18.971 | 0.00 | 0.00 | N |
| ATOM | 661 | CA   | SER | 41 | 35.535 | 44.736 | 20.269 | 0.00 | 0.00 | C |
| ATOM | 662 | C    | SER | 41 | 34.362 | 45.077 | 21.231 | 0.00 | 0.00 | C |
| ATOM | 663 | O    | SER | 41 | 34.617 | 45.102 | 22.376 | 0.00 | 0.00 | O |
| ATOM | 664 | CB   | SER | 41 | 36.385 | 45.971 | 19.981 | 0.00 | 0.00 | C |
| ATOM | 665 | CG   | SER | 41 | 37.265 | 45.812 | 18.917 | 0.00 | 0.00 | O |
| ATOM | 666 | H    | SER | 41 | 35.009 | 44.570 | 18.130 | 0.00 | 0.00 | H |
| ATOM | 667 | HA   | SER | 41 | 36.165 | 44.001 | 20.769 | 0.00 | 0.00 | H |
| ATOM | 668 | HB2  | SER | 41 | 35.664 | 46.743 | 19.713 | 0.00 | 0.00 | H |
| ATOM | 669 | HB3  | SER | 41 | 37.008 | 46.276 | 20.822 | 0.00 | 0.00 | H |
| ATOM | 670 | HG   | SER | 41 | 36.646 | 45.751 | 18.185 | 0.00 | 0.00 | H |
| ATOM | 671 | N    | TYR | 42 | 33.080 | 45.052 | 20.786 | 0.00 | 0.00 | N |
| ATOM | 672 | CA   | TYR | 42 | 31.907 | 44.842 | 21.607 | 0.00 | 0.00 | C |
| ATOM | 673 | C    | TYR | 42 | 31.852 | 43.467 | 22.289 | 0.00 | 0.00 | C |
| ATOM | 674 | O    | TYR | 42 | 31.738 | 43.375 | 23.484 | 0.00 | 0.00 | O |
| ATOM | 675 | CB   | TYR | 42 | 30.635 | 45.147 | 20.710 | 0.00 | 0.00 | C |
| ATOM | 676 | CG   | TYR | 42 | 29.270 | 44.720 | 21.173 | 0.00 | 0.00 | C |
| ATOM | 677 | CD1  | TYR | 42 | 28.447 | 43.821 | 20.507 | 0.00 | 0.00 | C |
| ATOM | 678 | CD2  | TYR | 42 | 28.771 | 45.307 | 22.314 | 0.00 | 0.00 | C |
| ATOM | 679 | CE1  | TYR | 42 | 27.193 | 43.498 | 21.006 | 0.00 | 0.00 | C |
| ATOM | 680 | CE2  | TYR | 42 | 27.520 | 45.033 | 22.826 | 0.00 | 0.00 | C |
| ATOM | 681 | CZ   | TYR | 42 | 26.640 | 44.146 | 22.102 | 0.00 | 0.00 | C |
| ATOM | 682 | OH   | TYR | 42 | 25.389 | 43.937 | 22.503 | 0.00 | 0.00 | O |
| ATOM | 683 | H    | TYR | 42 | 32.907 | 45.126 | 19.794 | 0.00 | 0.00 | H |
| ATOM | 684 | HA   | TYR | 42 | 31.929 | 45.535 | 22.447 | 0.00 | 0.00 | H |
| ATOM | 685 | HB2  | TYR | 42 | 30.710 | 46.214 | 20.499 | 0.00 | 0.00 | H |
| ATOM | 686 | HB3  | TYR | 42 | 30.799 | 44.796 | 19.692 | 0.00 | 0.00 | H |
| ATOM | 687 | HD1  | TYR | 42 | 28.800 | 43.421 | 19.567 | 0.00 | 0.00 | H |
| ATOM | 688 | HD2  | TYR | 42 | 29.362 | 46.012 | 22.880 | 0.00 | 0.00 | H |
| ATOM | 689 | HE1  | TYR | 42 | 26.704 | 42.720 | 20.439 | 0.00 | 0.00 | H |
| ATOM | 690 | HE2  | TYR | 42 | 27.088 | 45.564 | 23.661 | 0.00 | 0.00 | H |
| ATOM | 691 | HH   | TYR | 42 | 24.847 | 43.270 | 22.077 | 0.00 | 0.00 | H |
| ATOM | 692 | N    | VAL | 43 | 32.023 | 42.369 | 21.511 | 0.00 | 0.00 | N |
| ATOM | 693 | CA   | VAL | 43 | 31.819 | 41.002 | 22.035 | 0.00 | 0.00 | C |
| ATOM | 694 | C    | VAL | 43 | 32.867 | 40.617 | 23.046 | 0.00 | 0.00 | C |
| ATOM | 695 | O    | VAL | 43 | 32.531 | 40.332 | 24.215 | 0.00 | 0.00 | O |
| ATOM | 696 | CB   | VAL | 43 | 31.792 | 39.964 | 20.866 | 0.00 | 0.00 | C |
| ATOM | 697 | CG1  | VAL | 43 | 31.782 | 38.450 | 21.226 | 0.00 | 0.00 | C |
| ATOM | 698 | CG2  | VAL | 43 | 30.376 | 40.141 | 20.131 | 0.00 | 0.00 | C |
| ATOM | 699 | H    | VAL | 43 | 32.074 | 42.457 | 20.506 | 0.00 | 0.00 | H |
| ATOM | 700 | HA   | VAL | 43 | 30.818 | 40.898 | 22.454 | 0.00 | 0.00 | H |
| ATOM | 701 | HB   | VAL | 43 | 32.625 | 40.182 | 20.198 | 0.00 | 0.00 | H |
| ATOM | 702 | HG11 | VAL | 43 | 31.427 | 37.779 | 20.443 | 0.00 | 0.00 | H |
| ATOM | 703 | HG12 | VAL | 43 | 32.786 | 38.277 | 21.617 | 0.00 | 0.00 | H |
| ATOM | 704 | HG13 | VAL | 43 | 31.133 | 38.256 | 22.079 | 0.00 | 0.00 | H |
| ATOM | 705 | HG21 | VAL | 43 | 29.503 | 40.148 | 20.783 | 0.00 | 0.00 | H |
| ATOM | 706 | HG22 | VAL | 43 | 30.465 | 41.092 | 19.606 | 0.00 | 0.00 | H |
| ATOM | 707 | HG23 | VAL | 43 | 30.257 | 39.263 | 19.496 | 0.00 | 0.00 | H |
| ATOM | 708 | N    | PHE | 44 | 34.143 | 40.933 | 22.712 | 0.00 | 0.00 | N |
| ATOM | 709 | CA   | PHE | 44 | 35.226 | 41.024 | 23.750 | 0.00 | 0.00 | C |
| ATOM | 710 | C    | PHE | 44 | 34.960 | 41.895 | 24.987 | 0.00 | 0.00 | C |
| ATOM | 711 | O    | PHE | 44 | 35.007 | 41.407 | 26.171 | 0.00 | 0.00 | O |
| ATOM | 712 | CB   | PHE | 44 | 36.497 | 41.442 | 23.077 | 0.00 | 0.00 | C |
| ATOM | 713 | CG   | PHE | 44 | 37.731 | 41.754 | 23.880 | 0.00 | 0.00 | C |
| ATOM | 714 | CD1  | PHE | 44 | 38.434 | 40.632 | 24.359 | 0.00 | 0.00 | C |
| ATOM | 715 | CD2  | PHE | 44 | 38.218 | 43.072 | 23.996 | 0.00 | 0.00 | C |
| ATOM | 716 | CE1  | PHE | 44 | 39.649 | 40.842 | 25.079 | 0.00 | 0.00 | C |
| ATOM | 717 | CE2  | PHE | 44 | 39.408 | 43.263 | 24.729 | 0.00 | 0.00 | C |
| ATOM | 718 | CZ   | PHE | 44 | 40.121 | 42.180 | 25.298 | 0.00 | 0.00 | C |
| ATOM | 719 | H    | PHE | 44 | 34.380 | 41.284 | 21.794 | 0.00 | 0.00 | H |
| ATOM | 720 | HA   | PHE | 44 | 35.463 | 40.051 | 24.181 | 0.00 | 0.00 | H |
| ATOM | 721 | HB2  | PHE | 44 | 36.805 | 40.621 | 22.431 | 0.00 | 0.00 | H |
| ATOM | 722 | HB3  | PHE | 44 | 36.228 | 42.320 | 22.490 | 0.00 | 0.00 | H |
| ATOM | 723 | HD1  | PHE | 44 | 38.083 | 39.616 | 24.259 | 0.00 | 0.00 | H |
| ATOM | 724 | HD2  | PHE | 44 | 37.576 | 43.849 | 23.611 | 0.00 | 0.00 | H |
| ATOM | 725 | HE1  | PHE | 44 | 40.227 | 39.990 | 25.404 | 0.00 | 0.00 | H |
| ATOM | 726 | HE2  | PHE | 44 | 39.727 | 44.277 | 24.915 | 0.00 | 0.00 | H |
| ATOM | 727 | HZ   | PHE | 44 | 41.056 | 42.407 | 25.789 | 0.00 | 0.00 | H |
| ATOM | 728 | N    | TYR | 45 | 34.715 | 43.253 | 24.850 | 0.00 | 0.00 | N |
| ATOM | 729 | CA   | TYR | 45 | 34.548 | 44.051 | 26.085 | 0.00 | 0.00 | C |
| ATOM | 730 | C    | TYR | 45 | 33.297 | 43.696 | 26.912 | 0.00 | 0.00 | C |
| ATOM | 731 | O    | TYR | 45 | 33.364 | 43.821 | 28.113 | 0.00 | 0.00 | O |
| ATOM | 732 | CB   | TYR | 45 | 34.565 | 45.588 | 25.711 | 0.00 | 0.00 | C |
| ATOM | 733 | CG   | TYR | 45 | 35.965 | 46.199 | 25.507 | 0.00 | 0.00 | C |
| ATOM | 734 | CD1  | TYR | 45 | 36.900 | 46.067 | 26.534 | 0.00 | 0.00 | C |
| ATOM | 735 | CD2  | TYR | 45 | 36.414 | 46.784 | 24.286 | 0.00 | 0.00 | C |
| ATOM | 736 | CE1  | TYR | 45 | 38.273 | 46.433 | 26.440 | 0.00 | 0.00 | C |
| ATOM | 737 | CE2  | TYR | 45 | 37.750 | 47.177 | 24.138 | 0.00 | 0.00 | C |
| ATOM | 738 | CZ   | TYR | 45 | 38.661 | 47.006 | 25.201 | 0.00 | 0.00 | C |
| ATOM | 739 | OH   | TYR | 45 | 39.931 | 47.536 | 25.108 | 0.00 | 0.00 | O |
| ATOM | 740 | H    | TYR | 45 | 34.797 | 43.717 | 23.956 | 0.00 | 0.00 | H |
| ATOM | 741 | HA   | TYR | 45 | 35.427 | 43.757 | 26.659 | 0.00 | 0.00 | H |
| ATOM | 742 | HB2  | TYR | 45 | 33.970 | 45.733 | 24.809 | 0.00 | 0.00 | H |
| ATOM | 743 | HB3  | TYR | 45 | 34.059 | 46.227 | 26.435 | 0.00 | 0.00 | H |
| ATOM | 744 | HD1  | TYR | 45 | 36.624 | 45.675 | 27.501 | 0.00 | 0.00 | H |
| ATOM | 745 | HD2  | TYR | 45 | 35.689 | 46.872 | 23.491 | 0.00 | 0.00 | H |
| ATOM | 746 | HE1  | TYR | 45 | 38.962 | 46.361 | 27.267 | 0.00 | 0.00 | H |
| ATOM | 747 | HE2  | TYR | 45 | 38.099 | 47.547 | 23.186 | 0.00 | 0.00 | H |
| ATOM | 748 | HH   | TYR | 45 | 40.416 | 47.322 | 25.907 | 0.00 | 0.00 | H |
| ATOM | 749 | N    | ARG | 46 | 32.240 | 43.240 | 26.256 | 0.00 | 0.00 | N |
| ATOM | 750 | CA   | ARG | 46 | 31.042 | 42.694 | 26.839 | 0.00 | 0.00 | C |
| ATOM | 751 | C    | ARG | 46 | 31.233 | 41.373 | 27.688 | 0.00 | 0.00 | C |
| ATOM | 752 | O    | ARG | 46 | 31.156 | 41.403 | 28.924 | 0.00 | 0.00 | O |

|      |     |      |     |    |        |        |        |      |      |     |
|------|-----|------|-----|----|--------|--------|--------|------|------|-----|
| ATOM | 753 | CB   | ARG | 46 | 29.893 | 42.800 | 25.847 | 0.00 | 0.00 | C   |
| ATOM | 754 | CG   | ARG | 46 | 28.486 | 42.823 | 26.507 | 0.00 | 0.00 | C   |
| ATOM | 755 | CD   | ARG | 46 | 28.123 | 44.149 | 27.287 | 0.00 | 0.00 | C   |
| ATOM | 756 | NE   | ARG | 46 | 27.013 | 43.895 | 28.229 | 0.00 | 0.00 | N   |
| ATOM | 757 | CZ   | ARG | 46 | 27.154 | 43.607 | 29.498 | 0.00 | 0.00 | C   |
| ATOM | 758 | NH1  | ARG | 46 | 28.245 | 43.736 | 30.177 | 0.00 | 0.00 | N1+ |
| ATOM | 759 | NH2  | ARG | 46 | 26.128 | 43.076 | 30.170 | 0.00 | 0.00 | N   |
| ATOM | 760 | H    | ARG | 46 | 32.192 | 43.225 | 25.247 | 0.00 | 0.00 | H   |
| ATOM | 761 | HA   | ARG | 46 | 30.783 | 43.408 | 27.622 | 0.00 | 0.00 | H   |
| ATOM | 762 | HB2  | ARG | 46 | 29.914 | 43.640 | 25.152 | 0.00 | 0.00 | H   |
| ATOM | 763 | HB3  | ARG | 46 | 30.002 | 41.941 | 25.186 | 0.00 | 0.00 | H   |
| ATOM | 764 | HG2  | ARG | 46 | 27.594 | 42.700 | 25.893 | 0.00 | 0.00 | H   |
| ATOM | 765 | HG3  | ARG | 46 | 28.494 | 41.945 | 27.152 | 0.00 | 0.00 | H   |
| ATOM | 766 | HD2  | ARG | 46 | 29.007 | 44.552 | 27.781 | 0.00 | 0.00 | H   |
| ATOM | 767 | HD3  | ARG | 46 | 27.790 | 44.861 | 26.532 | 0.00 | 0.00 | H   |
| ATOM | 768 | HE   | ARG | 46 | 26.057 | 43.939 | 27.906 | 0.00 | 0.00 | H   |
| ATOM | 769 | HH11 | ARG | 46 | 28.879 | 44.449 | 29.846 | 0.00 | 0.00 | H   |
| ATOM | 770 | HH12 | ARG | 46 | 28.332 | 43.298 | 31.083 | 0.00 | 0.00 | H   |
| ATOM | 771 | HH21 | ARG | 46 | 25.241 | 42.887 | 29.726 | 0.00 | 0.00 | H   |
| ATOM | 772 | HH22 | ARG | 46 | 26.197 | 42.934 | 31.168 | 0.00 | 0.00 | H   |
| ATOM | 773 | N    | HIP | 47 | 31.698 | 40.314 | 27.088 | 0.00 | 0.00 | N   |
| ATOM | 774 | CA   | HIP | 47 | 32.224 | 39.072 | 27.843 | 0.00 | 0.00 | C   |
| ATOM | 775 | C    | HIP | 47 | 33.433 | 39.320 | 28.829 | 0.00 | 0.00 | C   |
| ATOM | 776 | O    | HIP | 47 | 33.388 | 38.664 | 29.860 | 0.00 | 0.00 | O   |
| ATOM | 777 | CB   | HIP | 47 | 32.581 | 38.065 | 26.797 | 0.00 | 0.00 | C   |
| ATOM | 778 | CG   | HIP | 47 | 32.967 | 36.742 | 27.263 | 0.00 | 0.00 | C   |
| ATOM | 779 | CD2  | HIP | 47 | 34.029 | 36.019 | 26.874 | 0.00 | 0.00 | C   |
| ATOM | 780 | ND1  | HIP | 47 | 32.122 | 35.889 | 28.006 | 0.00 | 0.00 | N1+ |
| ATOM | 781 | CE1  | HIP | 47 | 32.707 | 34.734 | 28.053 | 0.00 | 0.00 | C   |
| ATOM | 782 | NE2  | HIP | 47 | 33.906 | 34.754 | 27.366 | 0.00 | 0.00 | N   |
| ATOM | 783 | H    | HIP | 47 | 31.832 | 40.382 | 26.089 | 0.00 | 0.00 | H   |
| ATOM | 784 | HA   | HIP | 47 | 31.460 | 38.626 | 28.479 | 0.00 | 0.00 | H   |
| ATOM | 785 | HB2  | HIP | 47 | 31.725 | 37.858 | 26.154 | 0.00 | 0.00 | H   |
| ATOM | 786 | HB3  | HIP | 47 | 33.344 | 38.438 | 26.114 | 0.00 | 0.00 | H   |
| ATOM | 787 | HD1  | HIP | 47 | 31.324 | 36.175 | 28.555 | 0.00 | 0.00 | H   |
| ATOM | 788 | HD2  | HIP | 47 | 34.843 | 36.269 | 26.210 | 0.00 | 0.00 | H   |
| ATOM | 789 | HE1  | HIP | 47 | 32.428 | 33.940 | 28.730 | 0.00 | 0.00 | H   |
| ATOM | 790 | HE2  | HIP | 47 | 34.510 | 33.945 | 27.331 | 0.00 | 0.00 | H   |
| ATOM | 791 | N    | GLN | 48 | 34.312 | 40.271 | 28.569 | 0.00 | 0.00 | N   |
| ATOM | 792 | CA   | GLN | 48 | 35.343 | 40.749 | 29.544 | 0.00 | 0.00 | C   |
| ATOM | 793 | C    | GLN | 48 | 34.759 | 41.440 | 30.766 | 0.00 | 0.00 | C   |
| ATOM | 794 | O    | GLN | 48 | 35.077 | 41.059 | 31.901 | 0.00 | 0.00 | O   |
| ATOM | 795 | CB   | GLN | 48 | 36.331 | 41.678 | 28.889 | 0.00 | 0.00 | C   |
| ATOM | 796 | CG   | GLN | 48 | 37.444 | 42.197 | 29.855 | 0.00 | 0.00 | C   |
| ATOM | 797 | CD   | GLN | 48 | 38.449 | 41.111 | 30.248 | 0.00 | 0.00 | C   |
| ATOM | 798 | NE2  | GLN | 48 | 39.467 | 41.491 | 31.019 | 0.00 | 0.00 | N   |
| ATOM | 799 | OE1  | GLN | 48 | 38.380 | 39.978 | 29.806 | 0.00 | 0.00 | O   |
| ATOM | 800 | H    | GLN | 48 | 34.424 | 40.536 | 27.601 | 0.00 | 0.00 | H   |
| ATOM | 801 | HA   | GLN | 48 | 35.866 | 39.854 | 29.880 | 0.00 | 0.00 | H   |
| ATOM | 802 | HB2  | GLN | 48 | 36.786 | 41.309 | 27.969 | 0.00 | 0.00 | H   |
| ATOM | 803 | HB3  | GLN | 48 | 35.784 | 42.553 | 28.536 | 0.00 | 0.00 | H   |
| ATOM | 804 | HG2  | GLN | 48 | 38.013 | 42.961 | 29.326 | 0.00 | 0.00 | H   |
| ATOM | 805 | HG3  | GLN | 48 | 36.941 | 42.720 | 30.668 | 0.00 | 0.00 | H   |
| ATOM | 806 | HE21 | GLN | 48 | 39.903 | 40.673 | 31.421 | 0.00 | 0.00 | H   |
| ATOM | 807 | HE22 | GLN | 48 | 39.649 | 42.385 | 31.453 | 0.00 | 0.00 | H   |
| ATOM | 808 | N    | GLU | 49 | 33.863 | 42.411 | 30.620 | 0.00 | 0.00 | N   |
| ATOM | 809 | CA   | GLU | 49 | 33.101 | 42.998 | 31.714 | 0.00 | 0.00 | C   |
| ATOM | 810 | C    | GLU | 49 | 32.263 | 41.963 | 32.526 | 0.00 | 0.00 | C   |
| ATOM | 811 | O    | GLU | 49 | 32.215 | 42.044 | 33.739 | 0.00 | 0.00 | O   |
| ATOM | 812 | CB   | GLU | 49 | 32.185 | 44.039 | 31.204 | 0.00 | 0.00 | C   |
| ATOM | 813 | CG   | GLU | 49 | 31.258 | 44.739 | 32.164 | 0.00 | 0.00 | C   |
| ATOM | 814 | CD   | GLU | 49 | 31.977 | 45.531 | 33.238 | 0.00 | 0.00 | C   |
| ATOM | 815 | NE2  | GLU | 49 | 32.494 | 44.944 | 34.236 | 0.00 | 0.00 | N   |
| ATOM | 816 | OE1  | GLU | 49 | 32.065 | 46.768 | 33.157 | 0.00 | 0.00 | O   |
| ATOM | 817 | H    | GLU | 49 | 33.452 | 42.638 | 29.726 | 0.00 | 0.00 | H   |
| ATOM | 818 | HA   | GLU | 49 | 33.718 | 43.527 | 32.439 | 0.00 | 0.00 | H   |
| ATOM | 819 | HB2  | GLU | 49 | 32.806 | 44.812 | 30.753 | 0.00 | 0.00 | H   |
| ATOM | 820 | HB3  | GLU | 49 | 31.546 | 43.610 | 30.433 | 0.00 | 0.00 | H   |
| ATOM | 821 | HG2  | GLU | 49 | 30.544 | 45.370 | 31.635 | 0.00 | 0.00 | H   |
| ATOM | 822 | HG3  | GLU | 49 | 30.560 | 44.041 | 32.627 | 0.00 | 0.00 | H   |
| ATOM | 823 | HE21 | GLU | 49 | 32.592 | 45.606 | 34.993 | 0.00 | 0.00 | H   |
| ATOM | 824 | HE22 | GLU | 49 | 32.426 | 43.952 | 34.413 | 0.00 | 0.00 | H   |
| ATOM | 825 | N    | GLU | 50 | 31.542 | 41.017 | 31.860 | 0.00 | 0.00 | N   |
| ATOM | 826 | CA   | GLU | 50 | 30.670 | 40.013 | 32.591 | 0.00 | 0.00 | C   |
| ATOM | 827 | C    | GLU | 50 | 31.545 | 38.863 | 33.200 | 0.00 | 0.00 | C   |
| ATOM | 828 | O    | GLU | 50 | 31.083 | 38.172 | 34.083 | 0.00 | 0.00 | O   |
| ATOM | 829 | CB   | GLU | 50 | 29.631 | 39.345 | 31.659 | 0.00 | 0.00 | C   |
| ATOM | 830 | CG   | GLU | 50 | 28.617 | 40.312 | 30.962 | 0.00 | 0.00 | C   |
| ATOM | 831 | CD   | GLU | 50 | 27.632 | 39.459 | 30.180 | 0.00 | 0.00 | C   |
| ATOM | 832 | OE1  | GLU | 50 | 28.021 | 38.976 | 29.081 | 0.00 | 0.00 | O   |
| ATOM | 833 | OE2  | GLU | 50 | 26.517 | 39.150 | 30.717 | 0.00 | 0.00 | O1- |
| ATOM | 834 | H    | GLU | 50 | 31.492 | 41.019 | 30.851 | 0.00 | 0.00 | H   |
| ATOM | 835 | HA   | GLU | 50 | 30.045 | 40.483 | 33.350 | 0.00 | 0.00 | H   |
| ATOM | 836 | HB2  | GLU | 50 | 30.083 | 38.822 | 30.816 | 0.00 | 0.00 | H   |
| ATOM | 837 | HB3  | GLU | 50 | 29.065 | 38.580 | 32.191 | 0.00 | 0.00 | H   |
| ATOM | 838 | HG2  | GLU | 50 | 28.041 | 40.781 | 31.759 | 0.00 | 0.00 | H   |
| ATOM | 839 | HG3  | GLU | 50 | 29.114 | 41.053 | 30.336 | 0.00 | 0.00 | H   |
| ATOM | 840 | N    | GLN | 51 | 32.823 | 38.815 | 32.862 | 0.00 | 0.00 | N   |
| ATOM | 841 | CA   | GLN | 51 | 33.783 | 38.056 | 33.603 | 0.00 | 0.00 | C   |
| ATOM | 842 | C    | GLN | 51 | 34.152 | 38.937 | 34.853 | 0.00 | 0.00 | C   |
| ATOM | 843 | O    | GLN | 51 | 34.003 | 38.481 | 35.966 | 0.00 | 0.00 | O   |
| ATOM | 844 | CB   | GLN | 51 | 35.020 | 37.622 | 32.849 | 0.00 | 0.00 | C   |
| ATOM | 845 | CG   | GLN | 51 | 34.794 | 36.507 | 31.878 | 0.00 | 0.00 | C   |
| ATOM | 846 | CD   | GLN | 51 | 36.081 | 36.215 | 31.021 | 0.00 | 0.00 | C   |
| ATOM | 847 | NE2  | GLN | 51 | 36.065 | 36.093 | 29.757 | 0.00 | 0.00 | N   |
| ATOM | 848 | OE1  | GLN | 51 | 37.095 | 35.618 | 31.417 | 0.00 | 0.00 | O   |
| ATOM | 849 | H    | GLN | 51 | 33.239 | 39.376 | 32.132 | 0.00 | 0.00 | H   |
| ATOM | 850 | HA   | GLN | 51 | 33.222 | 37.193 | 33.963 | 0.00 | 0.00 | H   |
| ATOM | 851 | HB2  | GLN | 51 | 35.355 | 38.489 | 32.278 | 0.00 | 0.00 | H   |
| ATOM | 852 | HB3  | GLN | 51 | 35.795 | 37.362 | 33.569 | 0.00 | 0.00 | H   |
| ATOM | 853 | HG2  | GLN | 51 | 34.556 | 35.552 | 32.346 | 0.00 | 0.00 | H   |
| ATOM | 854 | HG3  | GLN | 51 | 33.938 | 36.694 | 31.229 | 0.00 | 0.00 | H   |
| ATOM | 855 | HE21 | GLN | 51 | 36.941 | 36.597 | 29.262 | 0.00 | 0.00 | H   |
| ATOM | 856 | HE22 | GLN | 51 | 35.223 | 37.008 | 29.298 | 0.00 | 0.00 | H   |
| ATOM | 857 | N    | GLU | 52 | 34.573 | 40.215 | 34.564 | 0.00 | 0.00 | N   |

|      |     |      |     |    |        |        |        |      |      |     |
|------|-----|------|-----|----|--------|--------|--------|------|------|-----|
| ATOM | 858 | CA   | GLU | 52 | 35.061 | 41.060 | 35.683 | 0.00 | 0.00 | C   |
| ATOM | 859 | C    | GLU | 52 | 34.001 | 41.251 | 36.747 | 0.00 | 0.00 | C   |
| ATOM | 860 | O    | GLU | 52 | 34.298 | 41.464 | 37.909 | 0.00 | 0.00 | O   |
| ATOM | 861 | CB   | GLU | 52 | 35.714 | 42.289 | 35.076 | 0.00 | 0.00 | C   |
| ATOM | 862 | CG   | GLU | 52 | 36.234 | 43.251 | 36.125 | 0.00 | 0.00 | C   |
| ATOM | 863 | CD   | GLU | 52 | 36.753 | 44.564 | 35.538 | 0.00 | 0.00 | C   |
| ATOM | 864 | OE1  | GLU | 52 | 38.003 | 44.681 | 35.482 | 0.00 | 0.00 | O   |
| ATOM | 865 | OE2  | GLU | 52 | 36.077 | 45.545 | 35.371 | 0.00 | 0.00 | O1- |
| ATOM | 866 | H    | GLU | 52 | 34.642 | 40.734 | 33.702 | 0.00 | 0.00 | H   |
| ATOM | 867 | HA   | GLU | 52 | 35.833 | 40.511 | 36.222 | 0.00 | 0.00 | H   |
| ATOM | 868 | HB2  | GLU | 52 | 36.536 | 41.986 | 34.429 | 0.00 | 0.00 | H   |
| ATOM | 869 | HB3  | GLU | 52 | 34.990 | 42.740 | 34.397 | 0.00 | 0.00 | H   |
| ATOM | 870 | HG2  | GLU | 52 | 35.482 | 43.524 | 36.865 | 0.00 | 0.00 | H   |
| ATOM | 871 | HG3  | GLU | 52 | 37.117 | 42.851 | 36.623 | 0.00 | 0.00 | H   |
| ATOM | 872 | N    | ALA | 53 | 32.699 | 41.264 | 36.363 | 0.00 | 0.00 | N   |
| ATOM | 873 | CA   | ALA | 53 | 31.611 | 41.467 | 37.306 | 0.00 | 0.00 | C   |
| ATOM | 874 | C    | ALA | 53 | 31.420 | 40.372 | 38.380 | 0.00 | 0.00 | C   |
| ATOM | 875 | O    | ALA | 53 | 30.666 | 40.498 | 39.389 | 0.00 | 0.00 | O   |
| ATOM | 876 | CB   | ALA | 53 | 30.294 | 41.593 | 36.560 | 0.00 | 0.00 | C   |
| ATOM | 877 | H    | ALA | 53 | 32.437 | 41.124 | 35.398 | 0.00 | 0.00 | H   |
| ATOM | 878 | HA   | ALA | 53 | 31.670 | 42.460 | 37.749 | 0.00 | 0.00 | H   |
| ATOM | 879 | HB1  | ALA | 53 | 30.360 | 42.293 | 35.728 | 0.00 | 0.00 | H   |
| ATOM | 880 | HB2  | ALA | 53 | 29.973 | 40.622 | 36.184 | 0.00 | 0.00 | H   |
| ATOM | 881 | HB3  | ALA | 53 | 29.475 | 42.038 | 37.125 | 0.00 | 0.00 | H   |
| ATOM | 882 | N    | GLU | 54 | 32.164 | 39.223 | 38.339 | 0.00 | 0.00 | N   |
| ATOM | 883 | CA   | GLU | 54 | 32.158 | 38.141 | 39.377 | 0.00 | 0.00 | C   |
| ATOM | 884 | C    | GLU | 54 | 32.962 | 38.489 | 40.668 | 0.00 | 0.00 | C   |
| ATOM | 885 | O    | GLU | 54 | 33.008 | 37.709 | 41.619 | 0.00 | 0.00 | O   |
| ATOM | 886 | CB   | GLU | 54 | 32.773 | 36.912 | 38.725 | 0.00 | 0.00 | C   |
| ATOM | 887 | CG   | GLU | 54 | 32.049 | 36.124 | 37.639 | 0.00 | 0.00 | C   |
| ATOM | 888 | CD   | GLU | 54 | 30.798 | 35.606 | 38.299 | 0.00 | 0.00 | C   |
| ATOM | 889 | OE1  | GLU | 54 | 29.720 | 36.057 | 37.883 | 0.00 | 0.00 | O   |
| ATOM | 890 | OE2  | GLU | 54 | 30.807 | 34.795 | 39.241 | 0.00 | 0.00 | O1- |
| ATOM | 891 | H    | GLU | 54 | 32.761 | 39.129 | 37.530 | 0.00 | 0.00 | H   |
| ATOM | 892 | HA   | GLU | 54 | 31.121 | 38.100 | 39.710 | 0.00 | 0.00 | H   |
| ATOM | 893 | HB2  | GLU | 54 | 33.698 | 37.272 | 38.276 | 0.00 | 0.00 | H   |
| ATOM | 894 | HB3  | GLU | 54 | 32.949 | 36.216 | 39.545 | 0.00 | 0.00 | H   |
| ATOM | 895 | HG2  | GLU | 54 | 31.905 | 36.820 | 36.813 | 0.00 | 0.00 | H   |
| ATOM | 896 | HG3  | GLU | 54 | 32.755 | 35.346 | 37.349 | 0.00 | 0.00 | H   |
| ATOM | 897 | N    | GLY | 55 | 33.635 | 39.683 | 40.701 | 0.00 | 0.00 | N   |
| ATOM | 898 | CA   | GLY | 55 | 34.571 | 40.054 | 41.776 | 0.00 | 0.00 | C   |
| ATOM | 899 | C    | GLY | 55 | 35.930 | 39.356 | 41.589 | 0.00 | 0.00 | C   |
| ATOM | 900 | O    | GLY | 55 | 36.685 | 39.227 | 42.563 | 0.00 | 0.00 | O   |
| ATOM | 901 | H    | GLY | 55 | 33.596 | 40.349 | 39.942 | 0.00 | 0.00 | H   |
| ATOM | 902 | HA2  | GLY | 55 | 34.647 | 41.129 | 41.611 | 0.00 | 0.00 | H   |
| ATOM | 903 | HA3  | GLY | 55 | 34.079 | 39.856 | 42.728 | 0.00 | 0.00 | H   |
| ATOM | 904 | N    | VAL | 56 | 36.276 | 38.816 | 40.402 | 0.00 | 0.00 | N   |
| ATOM | 905 | CA   | VAL | 56 | 37.576 | 38.229 | 40.094 | 0.00 | 0.00 | C   |
| ATOM | 906 | C    | VAL | 56 | 38.568 | 39.253 | 39.463 | 0.00 | 0.00 | C   |
| ATOM | 907 | O    | VAL | 56 | 38.133 | 40.049 | 38.645 | 0.00 | 0.00 | O   |
| ATOM | 908 | CB   | VAL | 56 | 37.462 | 37.021 | 39.163 | 0.00 | 0.00 | C   |
| ATOM | 909 | CG1  | VAL | 56 | 36.615 | 35.886 | 39.822 | 0.00 | 0.00 | C   |
| ATOM | 910 | CG2  | VAL | 56 | 36.779 | 37.410 | 37.811 | 0.00 | 0.00 | C   |
| ATOM | 911 | H    | VAL | 56 | 35.570 | 38.767 | 39.681 | 0.00 | 0.00 | H   |
| ATOM | 912 | HA   | VAL | 56 | 38.040 | 37.820 | 40.991 | 0.00 | 0.00 | H   |
| ATOM | 913 | HB   | VAL | 56 | 38.454 | 36.611 | 38.973 | 0.00 | 0.00 | H   |
| ATOM | 914 | HG11 | VAL | 56 | 36.434 | 35.058 | 39.137 | 0.00 | 0.00 | H   |
| ATOM | 915 | HG12 | VAL | 56 | 37.053 | 35.449 | 40.720 | 0.00 | 0.00 | H   |
| ATOM | 916 | HG13 | VAL | 56 | 35.623 | 36.306 | 39.987 | 0.00 | 0.00 | H   |
| ATOM | 917 | HG21 | VAL | 56 | 36.530 | 36.468 | 37.321 | 0.00 | 0.00 | H   |
| ATOM | 918 | HG22 | VAL | 56 | 35.890 | 38.031 | 37.918 | 0.00 | 0.00 | H   |
| ATOM | 919 | HG23 | VAL | 56 | 37.524 | 38.014 | 37.296 | 0.00 | 0.00 | H   |
| ATOM | 920 | N    | ALA | 57 | 39.834 | 39.297 | 39.850 | 0.00 | 0.00 | N   |
| ATOM | 921 | CA   | ALA | 57 | 40.844 | 40.240 | 39.462 | 0.00 | 0.00 | C   |
| ATOM | 922 | C    | ALA | 57 | 41.581 | 39.678 | 38.216 | 0.00 | 0.00 | C   |
| ATOM | 923 | O    | ALA | 57 | 41.805 | 38.481 | 38.058 | 0.00 | 0.00 | O   |
| ATOM | 924 | CB   | ALA | 57 | 41.774 | 40.583 | 40.622 | 0.00 | 0.00 | C   |
| ATOM | 925 | H    | ALA | 57 | 40.117 | 38.673 | 40.592 | 0.00 | 0.00 | H   |
| ATOM | 926 | HA   | ALA | 57 | 40.302 | 41.108 | 39.084 | 0.00 | 0.00 | H   |
| ATOM | 927 | HB1  | ALA | 57 | 42.224 | 39.647 | 40.953 | 0.00 | 0.00 | H   |
| ATOM | 928 | HB2  | ALA | 57 | 42.443 | 41.384 | 40.306 | 0.00 | 0.00 | H   |
| ATOM | 929 | HB3  | ALA | 57 | 41.207 | 41.063 | 41.419 | 0.00 | 0.00 | H   |
| ATOM | 930 | N    | ALA | 58 | 41.861 | 40.533 | 37.208 | 0.00 | 0.00 | N   |
| ATOM | 931 | CA   | ALA | 58 | 42.565 | 40.168 | 35.957 | 0.00 | 0.00 | C   |
| ATOM | 932 | C    | ALA | 58 | 41.858 | 39.043 | 35.060 | 0.00 | 0.00 | C   |
| ATOM | 933 | O    | ALA | 58 | 42.589 | 38.163 | 34.610 | 0.00 | 0.00 | O   |
| ATOM | 934 | CB   | ALA | 58 | 44.019 | 40.022 | 36.262 | 0.00 | 0.00 | C   |
| ATOM | 935 | H    | ALA | 58 | 41.718 | 41.514 | 37.404 | 0.00 | 0.00 | H   |
| ATOM | 936 | HA   | ALA | 58 | 42.624 | 41.103 | 35.399 | 0.00 | 0.00 | H   |
| ATOM | 937 | HB1  | ALA | 58 | 44.438 | 39.944 | 35.258 | 0.00 | 0.00 | H   |
| ATOM | 938 | HB2  | ALA | 58 | 44.226 | 39.103 | 36.810 | 0.00 | 0.00 | H   |
| ATOM | 939 | HB3  | ALA | 58 | 44.463 | 40.868 | 36.786 | 0.00 | 0.00 | H   |
| ATOM | 940 | N    | PRO | 59 | 40.513 | 38.973 | 34.790 | 0.00 | 0.00 | N   |
| ATOM | 941 | CA   | PRO | 59 | 39.875 | 37.948 | 33.950 | 0.00 | 0.00 | C   |
| ATOM | 942 | C    | PRO | 59 | 40.349 | 38.026 | 32.464 | 0.00 | 0.00 | C   |
| ATOM | 943 | O    | PRO | 59 | 40.577 | 39.087 | 31.916 | 0.00 | 0.00 | O   |
| ATOM | 944 | CB   | PRO | 59 | 38.364 | 38.136 | 34.014 | 0.00 | 0.00 | C   |
| ATOM | 945 | CG   | PRO | 59 | 38.206 | 39.595 | 34.374 | 0.00 | 0.00 | C   |
| ATOM | 946 | CD   | PRO | 59 | 39.516 | 39.943 | 35.127 | 0.00 | 0.00 | C   |
| ATOM | 947 | HA   | PRO | 59 | 40.120 | 36.961 | 34.344 | 0.00 | 0.00 | H   |
| ATOM | 948 | HB2  | PRO | 59 | 38.004 | 37.460 | 34.790 | 0.00 | 0.00 | H   |
| ATOM | 949 | HB3  | PRO | 59 | 37.875 | 38.034 | 33.046 | 0.00 | 0.00 | H   |
| ATOM | 950 | HG2  | PRO | 59 | 38.114 | 40.126 | 33.426 | 0.00 | 0.00 | H   |
| ATOM | 951 | HG3  | PRO | 59 | 37.310 | 39.721 | 34.982 | 0.00 | 0.00 | H   |
| ATOM | 952 | HD2  | PRO | 59 | 39.712 | 40.984 | 34.865 | 0.00 | 0.00 | H   |
| ATOM | 953 | HD3  | PRO | 59 | 39.498 | 39.872 | 36.214 | 0.00 | 0.00 | H   |
| ATOM | 954 | N    | ALA | 60 | 40.411 | 36.856 | 31.792 | 0.00 | 0.00 | N   |
| ATOM | 955 | CA   | ALA | 60 | 40.855 | 36.579 | 30.422 | 0.00 | 0.00 | C   |
| ATOM | 956 | C    | ALA | 60 | 40.209 | 35.345 | 29.909 | 0.00 | 0.00 | C   |
| ATOM | 957 | O    | ALA | 60 | 40.379 | 34.263 | 30.488 | 0.00 | 0.00 | O   |
| ATOM | 958 | CB   | ALA | 60 | 42.377 | 36.480 | 30.490 | 0.00 | 0.00 | C   |
| ATOM | 959 | H    | ALA | 60 | 40.133 | 36.068 | 32.359 | 0.00 | 0.00 | H   |
| ATOM | 960 | HA   | ALA | 60 | 40.475 | 37.412 | 29.831 | 0.00 | 0.00 | H   |
| ATOM | 961 | HB1  | ALA | 60 | 42.611 | 35.880 | 31.370 | 0.00 | 0.00 | H   |
| ATOM | 962 | HB2  | ALA | 60 | 42.693 | 36.087 | 29.524 | 0.00 | 0.00 | H   |

|      |      |      |     |    |        |        |        |      |      |     |
|------|------|------|-----|----|--------|--------|--------|------|------|-----|
| ATOM | 963  | HB3  | ALA | 60 | 42.866 | 37.448 | 30.596 | 0.00 | 0.00 | H   |
| ATOM | 964  | N    | ASP | 61 | 39.513 | 35.396 | 28.813 | 0.00 | 0.00 | N   |
| ATOM | 965  | CA   | ASP | 61 | 39.008 | 34.204 | 28.052 | 0.00 | 0.00 | C   |
| ATOM | 966  | C    | ASP | 61 | 40.101 | 33.646 | 27.146 | 0.00 | 0.00 | C   |
| ATOM | 967  | O    | ASP | 61 | 40.559 | 34.329 | 26.172 | 0.00 | 0.00 | O   |
| ATOM | 968  | CB   | ASP | 61 | 37.646 | 34.446 | 27.314 | 0.00 | 0.00 | C   |
| ATOM | 969  | CG   | ASP | 61 | 37.004 | 33.270 | 26.721 | 0.00 | 0.00 | C   |
| ATOM | 970  | OD1  | ASP | 61 | 35.927 | 32.927 | 27.237 | 0.00 | 0.00 | O   |
| ATOM | 971  | OD2  | ASP | 61 | 37.614 | 32.674 | 25.796 | 0.00 | 0.00 | O1- |
| ATOM | 972  | H    | ASP | 61 | 39.278 | 36.288 | 28.403 | 0.00 | 0.00 | H   |
| ATOM | 973  | HA   | ASP | 61 | 38.737 | 33.451 | 28.792 | 0.00 | 0.00 | H   |
| ATOM | 974  | HB2  | ASP | 61 | 36.882 | 34.879 | 27.959 | 0.00 | 0.00 | H   |
| ATOM | 975  | HB3  | ASP | 61 | 37.934 | 35.099 | 26.489 | 0.00 | 0.00 | H   |
| ATOM | 976  | N    | PRO | 62 | 40.581 | 32.428 | 27.381 | 0.00 | 0.00 | N   |
| ATOM | 977  | CA   | PRO | 62 | 41.890 | 32.031 | 26.826 | 0.00 | 0.00 | C   |
| ATOM | 978  | C    | PRO | 62 | 41.725 | 31.538 | 25.428 | 0.00 | 0.00 | C   |
| ATOM | 979  | O    | PRO | 62 | 42.701 | 31.094 | 24.800 | 0.00 | 0.00 | O   |
| ATOM | 980  | CB   | PRO | 62 | 42.347 | 30.904 | 27.788 | 0.00 | 0.00 | C   |
| ATOM | 981  | CG   | PRO | 62 | 41.068 | 30.408 | 28.456 | 0.00 | 0.00 | C   |
| ATOM | 982  | CD   | PRO | 62 | 40.232 | 31.619 | 28.553 | 0.00 | 0.00 | C   |
| ATOM | 983  | HA   | PRO | 62 | 42.622 | 32.834 | 26.921 | 0.00 | 0.00 | H   |
| ATOM | 984  | HB2  | PRO | 62 | 42.932 | 31.423 | 28.547 | 0.00 | 0.00 | H   |
| ATOM | 985  | HB3  | PRO | 62 | 42.983 | 30.161 | 27.307 | 0.00 | 0.00 | H   |
| ATOM | 986  | HG2  | PRO | 62 | 40.584 | 29.732 | 27.752 | 0.00 | 0.00 | H   |
| ATOM | 987  | HG3  | PRO | 62 | 41.242 | 29.982 | 29.443 | 0.00 | 0.00 | H   |
| ATOM | 988  | HD2  | PRO | 62 | 39.171 | 31.373 | 28.572 | 0.00 | 0.00 | H   |
| ATOM | 989  | HD3  | PRO | 62 | 40.452 | 32.156 | 29.475 | 0.00 | 0.00 | H   |
| ATOM | 990  | N    | GLU | 63 | 40.542 | 31.494 | 24.879 | 0.00 | 0.00 | N   |
| ATOM | 991  | CA   | GLU | 63 | 40.161 | 31.030 | 23.570 | 0.00 | 0.00 | C   |
| ATOM | 992  | C    | GLU | 63 | 39.884 | 32.259 | 22.630 | 0.00 | 0.00 | C   |
| ATOM | 993  | O    | GLU | 63 | 40.179 | 32.105 | 21.442 | 0.00 | 0.00 | O   |
| ATOM | 994  | CB   | GLU | 63 | 38.914 | 30.068 | 23.730 | 0.00 | 0.00 | C   |
| ATOM | 995  | CG   | GLU | 63 | 39.265 | 28.744 | 24.404 | 0.00 | 0.00 | C   |
| ATOM | 996  | CD   | GLU | 63 | 38.189 | 27.683 | 24.070 | 0.00 | 0.00 | C   |
| ATOM | 997  | OE1  | GLU | 63 | 38.062 | 27.396 | 22.865 | 0.00 | 0.00 | O   |
| ATOM | 998  | OE2  | GLU | 63 | 37.608 | 27.061 | 24.954 | 0.00 | 0.00 | O1- |
| ATOM | 999  | H    | GLU | 63 | 39.781 | 31.707 | 25.509 | 0.00 | 0.00 | H   |
| ATOM | 1000 | HA   | GLU | 63 | 40.911 | 30.382 | 23.117 | 0.00 | 0.00 | H   |
| ATOM | 1001 | HB2  | GLU | 63 | 38.098 | 30.504 | 24.306 | 0.00 | 0.00 | H   |
| ATOM | 1002 | HB3  | GLU | 63 | 38.759 | 29.886 | 22.667 | 0.00 | 0.00 | H   |
| ATOM | 1003 | HG2  | GLU | 63 | 40.274 | 28.419 | 24.149 | 0.00 | 0.00 | H   |
| ATOM | 1004 | HG3  | GLU | 63 | 39.357 | 28.957 | 25.468 | 0.00 | 0.00 | H   |
| ATOM | 1005 | N    | MET | 64 | 39.622 | 33.451 | 23.195 | 0.00 | 0.00 | N   |
| ATOM | 1006 | CA   | MET | 64 | 39.474 | 34.720 | 22.470 | 0.00 | 0.00 | C   |
| ATOM | 1007 | C    | MET | 64 | 40.813 | 35.108 | 21.809 | 0.00 | 0.00 | C   |
| ATOM | 1008 | O    | MET | 64 | 40.854 | 35.919 | 20.882 | 0.00 | 0.00 | O   |
| ATOM | 1009 | CB   | MET | 64 | 38.949 | 35.828 | 23.441 | 0.00 | 0.00 | C   |
| ATOM | 1010 | CG   | MET | 64 | 38.132 | 36.973 | 22.830 | 0.00 | 0.00 | C   |
| ATOM | 1011 | SD   | MET | 64 | 36.595 | 36.554 | 21.964 | 0.00 | 0.00 | S   |
| ATOM | 1012 | CE   | MET | 64 | 35.515 | 36.170 | 23.381 | 0.00 | 0.00 | C   |
| ATOM | 1013 | H    | MET | 64 | 39.496 | 33.496 | 24.196 | 0.00 | 0.00 | H   |
| ATOM | 1014 | HA   | MET | 64 | 38.705 | 34.631 | 21.701 | 0.00 | 0.00 | H   |
| ATOM | 1015 | HB2  | MET | 64 | 38.406 | 35.403 | 24.285 | 0.00 | 0.00 | H   |
| ATOM | 1016 | HB3  | MET | 64 | 39.830 | 36.260 | 23.917 | 0.00 | 0.00 | H   |
| ATOM | 1017 | HG2  | MET | 64 | 37.874 | 37.591 | 23.689 | 0.00 | 0.00 | H   |
| ATOM | 1018 | HG3  | MET | 64 | 38.844 | 37.558 | 22.247 | 0.00 | 0.00 | H   |
| ATOM | 1019 | HE1  | MET | 64 | 35.281 | 37.099 | 23.899 | 0.00 | 0.00 | H   |
| ATOM | 1020 | HE2  | MET | 64 | 34.661 | 35.595 | 23.023 | 0.00 | 0.00 | H   |
| ATOM | 1021 | HE3  | MET | 64 | 36.200 | 35.630 | 24.034 | 0.00 | 0.00 | H   |
| ATOM | 1022 | N    | VAL | 65 | 41.912 | 34.480 | 22.193 | 0.00 | 0.00 | N   |
| ATOM | 1023 | CA   | VAL | 65 | 43.200 | 34.503 | 21.457 | 0.00 | 0.00 | C   |
| ATOM | 1024 | C    | VAL | 65 | 43.082 | 34.248 | 19.939 | 0.00 | 0.00 | C   |
| ATOM | 1025 | O    | VAL | 65 | 43.815 | 34.829 | 19.181 | 0.00 | 0.00 | O   |
| ATOM | 1026 | CB   | VAL | 65 | 44.179 | 33.457 | 21.970 | 0.00 | 0.00 | C   |
| ATOM | 1027 | CG1  | VAL | 65 | 44.561 | 33.770 | 23.417 | 0.00 | 0.00 | C   |
| ATOM | 1028 | CG2  | VAL | 65 | 43.754 | 31.985 | 21.905 | 0.00 | 0.00 | C   |
| ATOM | 1029 | H    | VAL | 65 | 41.823 | 33.822 | 22.953 | 0.00 | 0.00 | H   |
| ATOM | 1030 | HA   | VAL | 65 | 43.446 | 35.542 | 21.673 | 0.00 | 0.00 | H   |
| ATOM | 1031 | HB   | VAL | 65 | 45.095 | 33.527 | 21.385 | 0.00 | 0.00 | H   |
| ATOM | 1032 | HG11 | VAL | 65 | 45.461 | 33.204 | 23.658 | 0.00 | 0.00 | H   |
| ATOM | 1033 | HG12 | VAL | 65 | 43.856 | 33.444 | 24.181 | 0.00 | 0.00 | H   |
| ATOM | 1034 | HG13 | VAL | 65 | 44.729 | 34.845 | 23.487 | 0.00 | 0.00 | H   |
| ATOM | 1035 | HG21 | VAL | 65 | 44.342 | 31.401 | 22.614 | 0.00 | 0.00 | H   |
| ATOM | 1036 | HG22 | VAL | 65 | 42.737 | 31.871 | 22.281 | 0.00 | 0.00 | H   |
| ATOM | 1037 | HG23 | VAL | 65 | 43.884 | 31.542 | 20.919 | 0.00 | 0.00 | H   |
| ATOM | 1038 | N    | THR | 66 | 42.066 | 33.413 | 19.605 | 0.00 | 0.00 | N   |
| ATOM | 1039 | CA   | THR | 66 | 41.745 | 32.976 | 18.244 | 0.00 | 0.00 | C   |
| ATOM | 1040 | C    | THR | 66 | 41.152 | 34.087 | 17.430 | 0.00 | 0.00 | C   |
| ATOM | 1041 | O    | THR | 66 | 41.237 | 34.084 | 16.181 | 0.00 | 0.00 | O   |
| ATOM | 1042 | CB   | THR | 66 | 40.705 | 31.857 | 18.199 | 0.00 | 0.00 | C   |
| ATOM | 1043 | CG2  | THR | 66 | 41.248 | 30.596 | 18.754 | 0.00 | 0.00 | C   |
| ATOM | 1044 | OG1  | THR | 66 | 39.495 | 32.178 | 18.866 | 0.00 | 0.00 | O   |
| ATOM | 1045 | H    | THR | 66 | 41.598 | 32.951 | 20.371 | 0.00 | 0.00 | H   |
| ATOM | 1046 | HA   | THR | 66 | 42.640 | 32.720 | 17.676 | 0.00 | 0.00 | H   |
| ATOM | 1047 | HB   | THR | 66 | 40.489 | 31.599 | 17.161 | 0.00 | 0.00 | H   |
| ATOM | 1048 | HG1  | THR | 66 | 39.541 | 31.863 | 19.772 | 0.00 | 0.00 | H   |
| ATOM | 1049 | HG21 | THR | 66 | 42.054 | 30.236 | 18.116 | 0.00 | 0.00 | H   |
| ATOM | 1050 | HG22 | THR | 66 | 41.594 | 30.688 | 19.783 | 0.00 | 0.00 | H   |
| ATOM | 1051 | HG23 | THR | 66 | 40.429 | 29.889 | 18.891 | 0.00 | 0.00 | H   |
| ATOM | 1052 | N    | LEU | 67 | 40.592 | 35.134 | 18.085 | 0.00 | 0.00 | N   |
| ATOM | 1053 | CA   | LEU | 67 | 39.851 | 36.297 | 17.469 | 0.00 | 0.00 | C   |
| ATOM | 1054 | C    | LEU | 67 | 40.820 | 37.366 | 17.002 | 0.00 | 0.00 | C   |
| ATOM | 1055 | O    | LEU | 67 | 41.658 | 37.844 | 17.758 | 0.00 | 0.00 | O   |
| ATOM | 1056 | CB   | LEU | 67 | 38.753 | 36.855 | 18.453 | 0.00 | 0.00 | C   |
| ATOM | 1057 | CG   | LEU | 67 | 37.597 | 37.645 | 17.745 | 0.00 | 0.00 | C   |
| ATOM | 1058 | CD1  | LEU | 67 | 36.720 | 36.758 | 16.884 | 0.00 | 0.00 | C   |
| ATOM | 1059 | CD2  | LEU | 67 | 36.574 | 38.154 | 18.828 | 0.00 | 0.00 | C   |
| ATOM | 1060 | H    | LEU | 67 | 40.639 | 35.166 | 19.094 | 0.00 | 0.00 | H   |
| ATOM | 1061 | HA   | LEU | 67 | 39.389 | 35.851 | 16.588 | 0.00 | 0.00 | H   |
| ATOM | 1062 | HB2  | LEU | 67 | 38.260 | 36.064 | 19.019 | 0.00 | 0.00 | H   |
| ATOM | 1063 | HB3  | LEU | 67 | 39.212 | 37.556 | 19.149 | 0.00 | 0.00 | H   |
| ATOM | 1064 | HG   | LEU | 67 | 37.972 | 38.489 | 17.166 | 0.00 | 0.00 | H   |
| ATOM | 1065 | HD11 | LEU | 67 | 35.797 | 37.241 | 16.562 | 0.00 | 0.00 | H   |
| ATOM | 1066 | HD12 | LEU | 67 | 37.265 | 36.496 | 15.977 | 0.00 | 0.00 | H   |
| ATOM | 1067 | HD13 | LEU | 67 | 36.470 | 35.863 | 17.455 | 0.00 | 0.00 | H   |

|      |      |      |     |    |        |        |        |      |      |   |
|------|------|------|-----|----|--------|--------|--------|------|------|---|
| ATOM | 1068 | HD21 | LEU | 67 | 35.714 | 38.640 | 18.367 | 0.00 | 0.00 | H |
| ATOM | 1069 | HD22 | LEU | 67 | 36.230 | 37.271 | 19.366 | 0.00 | 0.00 | H |
| ATOM | 1070 | HD23 | LEU | 67 | 37.145 | 38.852 | 19.441 | 0.00 | 0.00 | H |
| ATOM | 1071 | N    | PRO | 68 | 40.846 | 37.830 | 15.732 | 0.00 | 0.00 | N |
| ATOM | 1072 | CA   | PRO | 68 | 41.523 | 39.049 | 15.316 | 0.00 | 0.00 | C |
| ATOM | 1073 | C    | PRO | 68 | 41.113 | 40.240 | 16.159 | 0.00 | 0.00 | C |
| ATOM | 1074 | O    | PRO | 68 | 39.925 | 40.634 | 16.094 | 0.00 | 0.00 | O |
| ATOM | 1075 | CB   | PRO | 68 | 41.136 | 39.296 | 13.806 | 0.00 | 0.00 | C |
| ATOM | 1076 | CG   | PRO | 68 | 40.535 | 37.967 | 13.383 | 0.00 | 0.00 | C |
| ATOM | 1077 | CD   | PRO | 68 | 40.110 | 37.263 | 14.656 | 0.00 | 0.00 | C |
| ATOM | 1078 | HA   | PRO | 68 | 42.601 | 38.908 | 15.389 | 0.00 | 0.00 | H |
| ATOM | 1079 | HB2  | PRO | 68 | 41.993 | 39.574 | 13.192 | 0.00 | 0.00 | H |
| ATOM | 1080 | HB3  | PRO | 68 | 40.368 | 40.064 | 13.709 | 0.00 | 0.00 | H |
| ATOM | 1081 | HG2  | PRO | 68 | 39.695 | 38.188 | 12.724 | 0.00 | 0.00 | H |
| ATOM | 1082 | HG3  | PRO | 68 | 41.391 | 37.414 | 12.997 | 0.00 | 0.00 | H |
| ATOM | 1083 | HD2  | PRO | 68 | 39.047 | 37.397 | 14.859 | 0.00 | 0.00 | H |
| ATOM | 1084 | HD3  | PRO | 68 | 40.268 | 36.186 | 14.615 | 0.00 | 0.00 | H |
| ATOM | 1085 | N    | LEU | 69 | 42.003 | 40.825 | 17.037 | 0.00 | 0.00 | N |
| ATOM | 1086 | CA   | LEU | 69 | 41.754 | 41.973 | 17.879 | 0.00 | 0.00 | C |
| ATOM | 1087 | C    | LEU | 69 | 42.969 | 42.944 | 17.982 | 0.00 | 0.00 | C |
| ATOM | 1088 | O    | LEU | 69 | 44.133 | 42.579 | 17.878 | 0.00 | 0.00 | O |
| ATOM | 1089 | CB   | LEU | 69 | 41.276 | 41.490 | 19.284 | 0.00 | 0.00 | C |
| ATOM | 1090 | CG   | LEU | 69 | 39.881 | 40.807 | 19.465 | 0.00 | 0.00 | C |
| ATOM | 1091 | CD1  | LEU | 69 | 39.999 | 40.174 | 20.906 | 0.00 | 0.00 | C |
| ATOM | 1092 | CD2  | LEU | 69 | 38.788 | 41.818 | 19.344 | 0.00 | 0.00 | C |
| ATOM | 1093 | H    | LEU | 69 | 42.933 | 40.430 | 17.036 | 0.00 | 0.00 | H |
| ATOM | 1094 | HA   | LEU | 69 | 40.922 | 42.548 | 17.474 | 0.00 | 0.00 | H |
| ATOM | 1095 | HB2  | LEU | 69 | 42.037 | 40.820 | 19.682 | 0.00 | 0.00 | H |
| ATOM | 1096 | HB3  | LEU | 69 | 41.383 | 42.316 | 19.987 | 0.00 | 0.00 | H |
| ATOM | 1097 | HG   | LEU | 69 | 39.702 | 40.056 | 18.695 | 0.00 | 0.00 | H |
| ATOM | 1098 | HD11 | LEU | 69 | 40.780 | 39.450 | 21.137 | 0.00 | 0.00 | H |
| ATOM | 1099 | HD12 | LEU | 69 | 39.055 | 39.634 | 20.960 | 0.00 | 0.00 | H |
| ATOM | 1100 | HD13 | LEU | 69 | 40.011 | 40.972 | 21.649 | 0.00 | 0.00 | H |
| ATOM | 1101 | HD21 | LEU | 69 | 38.881 | 42.674 | 20.012 | 0.00 | 0.00 | H |
| ATOM | 1102 | HD22 | LEU | 69 | 38.836 | 42.191 | 18.321 | 0.00 | 0.00 | H |
| ATOM | 1103 | HD23 | LEU | 69 | 37.849 | 41.311 | 19.568 | 0.00 | 0.00 | H |
| ATOM | 1104 | N    | GLN | 70 | 42.599 | 44.186 | 18.346 | 0.00 | 0.00 | N |
| ATOM | 1105 | CA   | GLN | 70 | 43.506 | 45.321 | 18.538 | 0.00 | 0.00 | C |
| ATOM | 1106 | C    | GLN | 70 | 42.726 | 46.423 | 19.412 | 0.00 | 0.00 | C |
| ATOM | 1107 | O    | GLN | 70 | 42.391 | 47.498 | 18.858 | 0.00 | 0.00 | O |
| ATOM | 1108 | CB   | GLN | 70 | 44.130 | 45.812 | 17.206 | 0.00 | 0.00 | C |
| ATOM | 1109 | CG   | GLN | 70 | 43.098 | 46.012 | 16.023 | 0.00 | 0.00 | C |
| ATOM | 1110 | CD   | GLN | 70 | 43.696 | 46.636 | 14.783 | 0.00 | 0.00 | C |
| ATOM | 1111 | NE2  | GLN | 70 | 42.895 | 47.250 | 13.988 | 0.00 | 0.00 | N |
| ATOM | 1112 | OE1  | GLN | 70 | 44.905 | 46.651 | 14.479 | 0.00 | 0.00 | O |
| ATOM | 1113 | H    | GLN | 70 | 41.645 | 44.498 | 18.233 | 0.00 | 0.00 | H |
| ATOM | 1114 | HA   | GLN | 70 | 44.319 | 44.911 | 19.137 | 0.00 | 0.00 | H |
| ATOM | 1115 | HB2  | GLN | 70 | 44.705 | 46.728 | 17.344 | 0.00 | 0.00 | H |
| ATOM | 1116 | HB3  | GLN | 70 | 44.847 | 45.068 | 16.861 | 0.00 | 0.00 | H |
| ATOM | 1117 | HG2  | GLN | 70 | 42.600 | 45.092 | 15.716 | 0.00 | 0.00 | H |
| ATOM | 1118 | HG3  | GLN | 70 | 42.378 | 46.741 | 16.395 | 0.00 | 0.00 | H |
| ATOM | 1119 | HE21 | GLN | 70 | 41.927 | 47.391 | 14.242 | 0.00 | 0.00 | H |
| ATOM | 1120 | HE22 | GLN | 70 | 43.377 | 47.720 | 13.237 | 0.00 | 0.00 | H |
| ATOM | 1121 | N    | PRO | 71 | 42.316 | 46.097 | 20.650 | 0.00 | 0.00 | N |
| ATOM | 1122 | CA   | PRO | 71 | 41.090 | 46.713 | 21.176 | 0.00 | 0.00 | C |
| ATOM | 1123 | C    | PRO | 71 | 41.302 | 48.119 | 21.633 | 0.00 | 0.00 | C |
| ATOM | 1124 | O    | PRO | 71 | 40.317 | 48.903 | 21.706 | 0.00 | 0.00 | O |
| ATOM | 1125 | CB   | PRO | 71 | 40.534 | 45.795 | 22.250 | 0.00 | 0.00 | C |
| ATOM | 1126 | CG   | PRO | 71 | 41.063 | 44.452 | 21.800 | 0.00 | 0.00 | C |
| ATOM | 1127 | CD   | PRO | 71 | 42.477 | 44.826 | 21.345 | 0.00 | 0.00 | C |
| ATOM | 1128 | HA   | PRO | 71 | 40.385 | 46.791 | 20.348 | 0.00 | 0.00 | H |
| ATOM | 1129 | HB2  | PRO | 71 | 39.444 | 45.791 | 22.244 | 0.00 | 0.00 | H |
| ATOM | 1130 | HB3  | PRO | 71 | 40.988 | 46.081 | 23.200 | 0.00 | 0.00 | H |
| ATOM | 1131 | HG2  | PRO | 71 | 41.049 | 43.822 | 22.690 | 0.00 | 0.00 | H |
| ATOM | 1132 | HG3  | PRO | 71 | 40.455 | 43.941 | 21.054 | 0.00 | 0.00 | H |
| ATOM | 1133 | HD2  | PRO | 71 | 43.023 | 45.085 | 22.253 | 0.00 | 0.00 | H |
| ATOM | 1134 | HD3  | PRO | 71 | 43.035 | 44.063 | 20.803 | 0.00 | 0.00 | H |
| ATOM | 1135 | N    | SER | 72 | 42.495 | 48.489 | 21.964 | 0.00 | 0.00 | N |
| ATOM | 1136 | CA   | SER | 72 | 42.820 | 49.821 | 22.485 | 0.00 | 0.00 | C |
| ATOM | 1137 | C    | SER | 72 | 43.146 | 50.808 | 21.334 | 0.00 | 0.00 | C |
| ATOM | 1138 | O    | SER | 72 | 43.619 | 51.926 | 21.639 | 0.00 | 0.00 | O |
| ATOM | 1139 | CB   | SER | 72 | 43.902 | 49.662 | 23.575 | 0.00 | 0.00 | C |
| ATOM | 1140 | CG   | SER | 72 | 43.506 | 48.781 | 24.620 | 0.00 | 0.00 | O |
| ATOM | 1141 | H    | SER | 72 | 43.235 | 47.810 | 21.861 | 0.00 | 0.00 | H |
| ATOM | 1142 | HA   | SER | 72 | 42.032 | 50.351 | 23.021 | 0.00 | 0.00 | H |
| ATOM | 1143 | HB2  | SER | 72 | 44.799 | 49.259 | 23.103 | 0.00 | 0.00 | H |
| ATOM | 1144 | HB3  | SER | 72 | 44.203 | 50.632 | 23.969 | 0.00 | 0.00 | H |
| ATOM | 1145 | HG   | SER | 72 | 43.818 | 47.878 | 24.524 | 0.00 | 0.00 | H |
| ATOM | 1146 | N    | SER | 73 | 42.902 | 50.375 | 20.092 | 0.00 | 0.00 | N |
| ATOM | 1147 | CA   | SER | 73 | 42.764 | 51.260 | 18.907 | 0.00 | 0.00 | C |
| ATOM | 1148 | C    | SER | 73 | 41.472 | 52.121 | 18.971 | 0.00 | 0.00 | C |
| ATOM | 1149 | O    | SER | 73 | 40.536 | 51.831 | 19.764 | 0.00 | 0.00 | O |
| ATOM | 1150 | CB   | SER | 73 | 42.645 | 50.392 | 17.659 | 0.00 | 0.00 | C |
| ATOM | 1151 | CG   | SER | 73 | 41.396 | 49.630 | 17.729 | 0.00 | 0.00 | O |
| ATOM | 1152 | H    | SER | 73 | 42.626 | 49.409 | 19.984 | 0.00 | 0.00 | H |
| ATOM | 1153 | HA   | SER | 73 | 43.680 | 51.825 | 18.735 | 0.00 | 0.00 | H |
| ATOM | 1154 | HB2  | SER | 73 | 42.647 | 50.955 | 16.725 | 0.00 | 0.00 | H |
| ATOM | 1155 | HB3  | SER | 73 | 43.500 | 49.718 | 17.608 | 0.00 | 0.00 | H |
| ATOM | 1156 | HG   | SER | 73 | 41.633 | 48.775 | 18.098 | 0.00 | 0.00 | H |
| ATOM | 1157 | N    | THR | 74 | 41.457 | 53.223 | 18.205 | 0.00 | 0.00 | N |
| ATOM | 1158 | CA   | THR | 74 | 40.319 | 54.143 | 18.128 | 0.00 | 0.00 | C |
| ATOM | 1159 | C    | THR | 74 | 38.965 | 53.492 | 17.932 | 0.00 | 0.00 | C |
| ATOM | 1160 | O    | THR | 74 | 38.034 | 53.794 | 18.717 | 0.00 | 0.00 | O |
| ATOM | 1161 | CB   | THR | 74 | 40.652 | 55.104 | 16.936 | 0.00 | 0.00 | C |
| ATOM | 1162 | CG2  | THR | 74 | 39.583 | 56.130 | 16.544 | 0.00 | 0.00 | C |
| ATOM | 1163 | OG1  | THR | 74 | 41.753 | 55.852 | 17.360 | 0.00 | 0.00 | O |
| ATOM | 1164 | H    | THR | 74 | 42.223 | 53.457 | 17.591 | 0.00 | 0.00 | H |
| ATOM | 1165 | HA   | THR | 74 | 40.304 | 54.772 | 19.018 | 0.00 | 0.00 | H |
| ATOM | 1166 | HB   | THR | 74 | 41.027 | 54.543 | 16.080 | 0.00 | 0.00 | H |
| ATOM | 1167 | HG1  | THR | 74 | 42.486 | 55.293 | 17.628 | 0.00 | 0.00 | H |
| ATOM | 1168 | HG21 | THR | 74 | 38.662 | 55.667 | 16.190 | 0.00 | 0.00 | H |
| ATOM | 1169 | HG22 | THR | 74 | 40.009 | 56.682 | 15.706 | 0.00 | 0.00 | H |
| ATOM | 1170 | HG23 | THR | 74 | 39.329 | 56.874 | 17.299 | 0.00 | 0.00 | H |
| ATOM | 1171 | N    | MET | 75 | 38.839 | 52.536 | 17.050 | 0.00 | 0.00 | N |
| ATOM | 1172 | CA   | MET | 75 | 37.634 | 51.915 | 16.693 | 0.00 | 0.00 | C |



|      |      |      |     |    |        |        |        |      |      |     |
|------|------|------|-----|----|--------|--------|--------|------|------|-----|
| ATOM | 1173 | C    | MET | 75 | 37.381 | 50.684 | 17.549 | 0.00 | 0.00 | C   |
| ATOM | 1174 | O    | MET | 75 | 36.210 | 50.311 | 17.681 | 0.00 | 0.00 | O   |
| ATOM | 1175 | CB   | MET | 75 | 37.619 | 51.568 | 15.166 | 0.00 | 0.00 | C   |
| ATOM | 1176 | CG   | MET | 75 | 36.186 | 51.440 | 14.501 | 0.00 | 0.00 | C   |
| ATOM | 1177 | SD   | MET | 75 | 35.140 | 52.986 | 14.630 | 0.00 | 0.00 | S   |
| ATOM | 1178 | CE   | MET | 75 | 35.959 | 53.993 | 13.409 | 0.00 | 0.00 | C   |
| ATOM | 1179 | H    | MET | 75 | 39.569 | 52.304 | 16.391 | 0.00 | 0.00 | H   |
| ATOM | 1180 | HA   | MET | 75 | 36.922 | 52.714 | 16.897 | 0.00 | 0.00 | H   |
| ATOM | 1181 | HB2  | MET | 75 | 38.227 | 52.289 | 14.620 | 0.00 | 0.00 | H   |
| ATOM | 1182 | HB3  | MET | 75 | 38.251 | 50.713 | 14.929 | 0.00 | 0.00 | H   |
| ATOM | 1183 | HG2  | MET | 75 | 36.392 | 51.208 | 13.456 | 0.00 | 0.00 | H   |
| ATOM | 1184 | HG3  | MET | 75 | 35.712 | 50.631 | 15.056 | 0.00 | 0.00 | H   |
| ATOM | 1185 | HE1  | MET | 75 | 36.578 | 53.403 | 12.733 | 0.00 | 0.00 | H   |
| ATOM | 1186 | HE2  | MET | 75 | 35.286 | 54.581 | 12.784 | 0.00 | 0.00 | H   |
| ATOM | 1187 | HE3  | MET | 75 | 36.590 | 54.757 | 13.865 | 0.00 | 0.00 | H   |
| ATOM | 1188 | N    | GLY | 76 | 38.431 | 50.011 | 18.046 | 0.00 | 0.00 | N   |
| ATOM | 1189 | CA   | GLY | 76 | 38.190 | 48.956 | 19.075 | 0.00 | 0.00 | C   |
| ATOM | 1190 | C    | GLY | 76 | 37.613 | 49.541 | 20.341 | 0.00 | 0.00 | C   |
| ATOM | 1191 | O    | GLY | 76 | 36.766 | 48.900 | 20.982 | 0.00 | 0.00 | O   |
| ATOM | 1192 | H    | GLY | 76 | 39.369 | 50.364 | 17.919 | 0.00 | 0.00 | H   |
| ATOM | 1193 | HA2  | GLY | 76 | 37.473 | 48.228 | 18.695 | 0.00 | 0.00 | H   |
| ATOM | 1194 | HA3  | GLY | 76 | 39.044 | 48.370 | 19.415 | 0.00 | 0.00 | H   |
| ATOM | 1195 | N    | GLN | 77 | 38.064 | 50.755 | 20.736 | 0.00 | 0.00 | N   |
| ATOM | 1196 | CA   | GLN | 77 | 37.404 | 51.575 | 21.765 | 0.00 | 0.00 | C   |
| ATOM | 1197 | C    | GLN | 77 | 35.924 | 51.943 | 21.466 | 0.00 | 0.00 | C   |
| ATOM | 1198 | O    | GLN | 77 | 35.120 | 52.155 | 22.394 | 0.00 | 0.00 | O   |
| ATOM | 1199 | CB   | GLN | 77 | 38.121 | 52.802 | 22.256 | 0.00 | 0.00 | C   |
| ATOM | 1200 | CG   | GLN | 77 | 39.302 | 52.537 | 23.191 | 0.00 | 0.00 | C   |
| ATOM | 1201 | CD   | GLN | 77 | 39.196 | 51.510 | 24.329 | 0.00 | 0.00 | C   |
| ATOM | 1202 | NE2  | GLN | 77 | 39.507 | 50.236 | 24.044 | 0.00 | 0.00 | N   |
| ATOM | 1203 | OE1  | GLN | 77 | 38.865 | 51.831 | 25.420 | 0.00 | 0.00 | O   |
| ATOM | 1204 | H    | GLN | 77 | 38.984 | 51.033 | 20.426 | 0.00 | 0.00 | H   |
| ATOM | 1205 | HA   | GLN | 77 | 37.210 | 50.886 | 22.588 | 0.00 | 0.00 | H   |
| ATOM | 1206 | HB2  | GLN | 77 | 38.483 | 53.364 | 21.395 | 0.00 | 0.00 | H   |
| ATOM | 1207 | HB3  | GLN | 77 | 37.349 | 53.427 | 22.705 | 0.00 | 0.00 | H   |
| ATOM | 1208 | HG2  | GLN | 77 | 40.179 | 52.315 | 22.583 | 0.00 | 0.00 | H   |
| ATOM | 1209 | HG3  | GLN | 77 | 39.508 | 53.471 | 23.716 | 0.00 | 0.00 | H   |
| ATOM | 1210 | HE21 | GLN | 77 | 39.266 | 49.528 | 24.724 | 0.00 | 0.00 | H   |
| ATOM | 1211 | HE22 | GLN | 77 | 39.855 | 49.906 | 23.156 | 0.00 | 0.00 | H   |
| ATOM | 1212 | N    | VAL | 78 | 35.479 | 52.057 | 20.192 | 0.00 | 0.00 | N   |
| ATOM | 1213 | CA   | VAL | 78 | 34.051 | 52.290 | 19.924 | 0.00 | 0.00 | C   |
| ATOM | 1214 | C    | VAL | 78 | 33.224 | 50.992 | 20.108 | 0.00 | 0.00 | C   |
| ATOM | 1215 | O    | VAL | 78 | 32.055 | 51.096 | 20.544 | 0.00 | 0.00 | O   |
| ATOM | 1216 | CB   | VAL | 78 | 33.803 | 52.965 | 18.510 | 0.00 | 0.00 | C   |
| ATOM | 1217 | CG1  | VAL | 78 | 32.359 | 52.966 | 17.964 | 0.00 | 0.00 | C   |
| ATOM | 1218 | CG2  | VAL | 78 | 34.388 | 54.332 | 18.497 | 0.00 | 0.00 | C   |
| ATOM | 1219 | H    | VAL | 78 | 36.109 | 51.972 | 19.406 | 0.00 | 0.00 | H   |
| ATOM | 1220 | HA   | VAL | 78 | 33.758 | 53.046 | 20.652 | 0.00 | 0.00 | H   |
| ATOM | 1221 | HB   | VAL | 78 | 34.421 | 52.493 | 17.746 | 0.00 | 0.00 | H   |
| ATOM | 1222 | HG11 | VAL | 78 | 31.927 | 52.018 | 17.645 | 0.00 | 0.00 | H   |
| ATOM | 1223 | HG12 | VAL | 78 | 31.650 | 53.564 | 18.537 | 0.00 | 0.00 | H   |
| ATOM | 1224 | HG13 | VAL | 78 | 32.409 | 53.494 | 17.011 | 0.00 | 0.00 | H   |
| ATOM | 1225 | HG21 | VAL | 78 | 35.467 | 54.204 | 18.569 | 0.00 | 0.00 | H   |
| ATOM | 1226 | HG22 | VAL | 78 | 34.068 | 54.839 | 17.586 | 0.00 | 0.00 | H   |
| ATOM | 1227 | HG23 | VAL | 78 | 34.032 | 54.908 | 19.351 | 0.00 | 0.00 | H   |
| ATOM | 1228 | N    | GLY | 79 | 33.833 | 49.857 | 19.984 | 0.00 | 0.00 | N   |
| ATOM | 1229 | CA   | GLY | 79 | 33.225 | 48.509 | 20.341 | 0.00 | 0.00 | C   |
| ATOM | 1230 | C    | GLY | 79 | 33.003 | 48.415 | 21.917 | 0.00 | 0.00 | C   |
| ATOM | 1231 | O    | GLY | 79 | 31.938 | 47.945 | 22.441 | 0.00 | 0.00 | O   |
| ATOM | 1232 | H    | GLY | 79 | 34.721 | 49.915 | 19.506 | 0.00 | 0.00 | H   |
| ATOM | 1233 | HA2  | GLY | 79 | 32.231 | 48.390 | 19.908 | 0.00 | 0.00 | H   |
| ATOM | 1234 | HA3  | GLY | 79 | 33.815 | 47.622 | 20.113 | 0.00 | 0.00 | H   |
| ATOM | 1235 | N    | ARG | 80 | 34.070 | 48.823 | 22.667 | 0.00 | 0.00 | N   |
| ATOM | 1236 | CA   | ARG | 80 | 33.994 | 48.961 | 24.144 | 0.00 | 0.00 | C   |
| ATOM | 1237 | C    | ARG | 80 | 32.828 | 49.904 | 24.573 | 0.00 | 0.00 | C   |
| ATOM | 1238 | O    | ARG | 80 | 32.139 | 49.588 | 25.489 | 0.00 | 0.00 | O   |
| ATOM | 1239 | CB   | ARG | 80 | 35.203 | 49.775 | 24.693 | 0.00 | 0.00 | C   |
| ATOM | 1240 | CG   | ARG | 80 | 35.236 | 49.823 | 26.262 | 0.00 | 0.00 | C   |
| ATOM | 1241 | CD   | ARG | 80 | 36.677 | 50.122 | 26.555 | 0.00 | 0.00 | C   |
| ATOM | 1242 | NE   | ARG | 80 | 36.975 | 49.979 | 27.973 | 0.00 | 0.00 | N   |
| ATOM | 1243 | CZ   | ARG | 80 | 38.159 | 50.016 | 28.519 | 0.00 | 0.00 | C   |
| ATOM | 1244 | NH1  | ARG | 80 | 38.487 | 49.512 | 29.708 | 0.00 | 0.00 | N1+ |
| ATOM | 1245 | NH2  | ARG | 80 | 39.161 | 50.528 | 27.832 | 0.00 | 0.00 | N   |
| ATOM | 1246 | H    | ARG | 80 | 34.924 | 49.061 | 22.182 | 0.00 | 0.00 | H   |
| ATOM | 1247 | HA   | ARG | 80 | 33.879 | 47.993 | 24.632 | 0.00 | 0.00 | H   |
| ATOM | 1248 | HB2  | ARG | 80 | 36.118 | 49.306 | 24.327 | 0.00 | 0.00 | H   |
| ATOM | 1249 | HB3  | ARG | 80 | 35.117 | 50.807 | 24.355 | 0.00 | 0.00 | H   |
| ATOM | 1250 | HG2  | ARG | 80 | 34.712 | 50.680 | 26.686 | 0.00 | 0.00 | H   |
| ATOM | 1251 | HG3  | ARG | 80 | 35.039 | 48.821 | 26.644 | 0.00 | 0.00 | H   |
| ATOM | 1252 | HD2  | ARG | 80 | 37.324 | 49.408 | 26.045 | 0.00 | 0.00 | H   |
| ATOM | 1253 | HD3  | ARG | 80 | 36.708 | 51.183 | 26.305 | 0.00 | 0.00 | H   |
| ATOM | 1254 | HE   | ARG | 80 | 36.202 | 49.673 | 28.547 | 0.00 | 0.00 | H   |
| ATOM | 1255 | HH11 | ARG | 80 | 37.781 | 49.076 | 30.283 | 0.00 | 0.00 | H   |
| ATOM | 1256 | HH12 | ARG | 80 | 39.334 | 49.752 | 30.202 | 0.00 | 0.00 | H   |
| ATOM | 1257 | HH21 | ARG | 80 | 39.121 | 50.932 | 26.908 | 0.00 | 0.00 | H   |
| ATOM | 1258 | HH22 | ARG | 80 | 40.002 | 50.664 | 28.374 | 0.00 | 0.00 | H   |
| ATOM | 1259 | N    | GLN | 81 | 32.657 | 51.124 | 23.934 | 0.00 | 0.00 | N   |
| ATOM | 1260 | CA   | GLN | 81 | 31.541 | 52.053 | 24.081 | 0.00 | 0.00 | C   |
| ATOM | 1261 | C    | GLN | 81 | 30.186 | 51.329 | 23.767 | 0.00 | 0.00 | C   |
| ATOM | 1262 | O    | GLN | 81 | 29.188 | 51.599 | 24.411 | 0.00 | 0.00 | O   |
| ATOM | 1263 | CB   | GLN | 81 | 31.742 | 53.404 | 23.337 | 0.00 | 0.00 | C   |
| ATOM | 1264 | CG   | GLN | 81 | 32.848 | 54.314 | 23.920 | 0.00 | 0.00 | C   |
| ATOM | 1265 | CD   | GLN | 81 | 32.931 | 55.734 | 23.320 | 0.00 | 0.00 | C   |
| ATOM | 1266 | NE2  | GLN | 81 | 33.798 | 56.526 | 23.879 | 0.00 | 0.00 | N   |
| ATOM | 1267 | OE1  | GLN | 81 | 32.201 | 56.114 | 22.481 | 0.00 | 0.00 | O   |
| ATOM | 1268 | H    | GLN | 81 | 33.493 | 51.382 | 23.429 | 0.00 | 0.00 | H   |
| ATOM | 1269 | HA   | GLN | 81 | 31.433 | 52.358 | 25.121 | 0.00 | 0.00 | H   |
| ATOM | 1270 | HB2  | GLN | 81 | 31.992 | 53.143 | 22.308 | 0.00 | 0.00 | H   |
| ATOM | 1271 | HB3  | GLN | 81 | 30.837 | 54.009 | 23.295 | 0.00 | 0.00 | H   |
| ATOM | 1272 | HG2  | GLN | 81 | 32.641 | 54.433 | 24.984 | 0.00 | 0.00 | H   |
| ATOM | 1273 | HG3  | GLN | 81 | 33.824 | 53.896 | 23.677 | 0.00 | 0.00 | H   |
| ATOM | 1274 | HE21 | GLN | 81 | 33.873 | 57.512 | 23.672 | 0.00 | 0.00 | H   |
| ATOM | 1275 | HE22 | GLN | 81 | 34.367 | 56.019 | 24.541 | 0.00 | 0.00 | H   |
| ATOM | 1276 | N    | LEU | 82 | 30.150 | 50.576 | 22.701 | 0.00 | 0.00 | N   |
| ATOM | 1277 | CA   | LEU | 82 | 29.059 | 49.706 | 22.353 | 0.00 | 0.00 | C   |

|      |      |      |     |    |        |        |        |      |      |     |
|------|------|------|-----|----|--------|--------|--------|------|------|-----|
| ATOM | 1278 | C    | LEU | 82 | 28.847 | 48.593 | 23.443 | 0.00 | 0.00 | C   |
| ATOM | 1279 | O    | LEU | 82 | 27.700 | 48.184 | 23.621 | 0.00 | 0.00 | O   |
| ATOM | 1280 | CB   | LEU | 82 | 29.254 | 49.120 | 20.965 | 0.00 | 0.00 | C   |
| ATOM | 1281 | CG   | LEU | 82 | 28.028 | 48.420 | 20.378 | 0.00 | 0.00 | C   |
| ATOM | 1282 | CD1  | LEU | 82 | 26.976 | 49.440 | 20.081 | 0.00 | 0.00 | C   |
| ATOM | 1283 | CD2  | LEU | 82 | 28.365 | 47.661 | 19.034 | 0.00 | 0.00 | C   |
| ATOM | 1284 | H    | LEU | 82 | 30.935 | 50.699 | 22.079 | 0.00 | 0.00 | H   |
| ATOM | 1285 | HA   | LEU | 82 | 28.120 | 50.256 | 22.409 | 0.00 | 0.00 | H   |
| ATOM | 1286 | HB2  | LEU | 82 | 29.492 | 49.896 | 20.237 | 0.00 | 0.00 | H   |
| ATOM | 1287 | HB3  | LEU | 82 | 30.165 | 48.525 | 20.905 | 0.00 | 0.00 | H   |
| ATOM | 1288 | HG   | LEU | 82 | 27.653 | 47.597 | 20.986 | 0.00 | 0.00 | H   |
| ATOM | 1289 | HD11 | LEU | 82 | 27.243 | 50.281 | 19.441 | 0.00 | 0.00 | H   |
| ATOM | 1290 | HD12 | LEU | 82 | 26.092 | 48.953 | 19.668 | 0.00 | 0.00 | H   |
| ATOM | 1291 | HD13 | LEU | 82 | 26.532 | 49.896 | 20.967 | 0.00 | 0.00 | H   |
| ATOM | 1292 | HD21 | LEU | 82 | 28.358 | 48.347 | 18.187 | 0.00 | 0.00 | H   |
| ATOM | 1293 | HD22 | LEU | 82 | 27.774 | 46.768 | 18.831 | 0.00 | 0.00 | H   |
| ATOM | 1294 | HD23 | LEU | 82 | 29.418 | 47.377 | 19.061 | 0.00 | 0.00 | H   |
| ATOM | 1295 | N    | ALA | 83 | 29.786 | 48.218 | 24.278 | 0.00 | 0.00 | N   |
| ATOM | 1296 | CA   | ALA | 83 | 29.670 | 47.254 | 25.351 | 0.00 | 0.00 | C   |
| ATOM | 1297 | C    | ALA | 83 | 29.134 | 48.015 | 26.585 | 0.00 | 0.00 | C   |
| ATOM | 1298 | O    | ALA | 83 | 28.128 | 47.617 | 27.201 | 0.00 | 0.00 | O   |
| ATOM | 1299 | CB   | ALA | 83 | 30.977 | 46.455 | 25.579 | 0.00 | 0.00 | C   |
| ATOM | 1300 | H    | ALA | 83 | 30.718 | 48.428 | 23.950 | 0.00 | 0.00 | H   |
| ATOM | 1301 | HA   | ALA | 83 | 28.937 | 46.478 | 25.133 | 0.00 | 0.00 | H   |
| ATOM | 1302 | HB1  | ALA | 83 | 31.614 | 47.222 | 26.017 | 0.00 | 0.00 | H   |
| ATOM | 1303 | HB2  | ALA | 83 | 30.819 | 45.678 | 26.327 | 0.00 | 0.00 | H   |
| ATOM | 1304 | HB3  | ALA | 83 | 31.348 | 46.136 | 24.605 | 0.00 | 0.00 | H   |
| ATOM | 1305 | N    | ILE | 84 | 29.701 | 49.215 | 26.936 | 0.00 | 0.00 | N   |
| ATOM | 1306 | CA   | ILE | 84 | 29.216 | 50.014 | 28.030 | 0.00 | 0.00 | C   |
| ATOM | 1307 | C    | ILE | 84 | 27.886 | 50.696 | 27.699 | 0.00 | 0.00 | C   |
| ATOM | 1308 | O    | ILE | 84 | 27.169 | 50.938 | 28.705 | 0.00 | 0.00 | O   |
| ATOM | 1309 | CB   | ILE | 84 | 30.366 | 50.907 | 28.562 | 0.00 | 0.00 | C   |
| ATOM | 1310 | CG1  | ILE | 84 | 30.754 | 51.986 | 27.559 | 0.00 | 0.00 | C   |
| ATOM | 1311 | CG2  | ILE | 84 | 31.615 | 50.289 | 29.150 | 0.00 | 0.00 | C   |
| ATOM | 1312 | CD1  | ILE | 84 | 30.957 | 53.367 | 28.198 | 0.00 | 0.00 | C   |
| ATOM | 1313 | H    | ILE | 84 | 30.503 | 49.510 | 26.396 | 0.00 | 0.00 | H   |
| ATOM | 1314 | HA   | ILE | 84 | 28.909 | 49.334 | 28.825 | 0.00 | 0.00 | H   |
| ATOM | 1315 | HB   | ILE | 84 | 29.921 | 51.528 | 29.340 | 0.00 | 0.00 | H   |
| ATOM | 1316 | HG12 | ILE | 84 | 31.746 | 51.708 | 27.203 | 0.00 | 0.00 | H   |
| ATOM | 1317 | HG13 | ILE | 84 | 30.024 | 51.979 | 26.750 | 0.00 | 0.00 | H   |
| ATOM | 1318 | HG21 | ILE | 84 | 32.181 | 51.107 | 29.597 | 0.00 | 0.00 | H   |
| ATOM | 1319 | HG22 | ILE | 84 | 31.388 | 49.690 | 30.032 | 0.00 | 0.00 | H   |
| ATOM | 1320 | HG23 | ILE | 84 | 32.262 | 49.776 | 28.439 | 0.00 | 0.00 | H   |
| ATOM | 1321 | HD11 | ILE | 84 | 31.404 | 54.081 | 27.506 | 0.00 | 0.00 | H   |
| ATOM | 1322 | HD12 | ILE | 84 | 30.031 | 53.703 | 28.667 | 0.00 | 0.00 | H   |
| ATOM | 1323 | HD13 | ILE | 84 | 31.672 | 53.246 | 29.012 | 0.00 | 0.00 | H   |
| ATOM | 1324 | N    | ILE | 85 | 27.436 | 50.772 | 26.459 | 0.00 | 0.00 | N   |
| ATOM | 1325 | CA   | ILE | 85 | 26.007 | 50.903 | 26.111 | 0.00 | 0.00 | C   |
| ATOM | 1326 | C    | ILE | 85 | 25.166 | 49.737 | 26.451 | 0.00 | 0.00 | C   |
| ATOM | 1327 | O    | ILE | 85 | 24.114 | 49.979 | 27.116 | 0.00 | 0.00 | O   |
| ATOM | 1328 | CB   | ILE | 85 | 25.753 | 51.462 | 24.700 | 0.00 | 0.00 | C   |
| ATOM | 1329 | CG1  | ILE | 85 | 25.963 | 52.974 | 24.742 | 0.00 | 0.00 | C   |
| ATOM | 1330 | CG2  | ILE | 85 | 24.277 | 51.240 | 24.280 | 0.00 | 0.00 | C   |
| ATOM | 1331 | CD1  | ILE | 85 | 26.430 | 53.480 | 23.363 | 0.00 | 0.00 | C   |
| ATOM | 1332 | H    | ILE | 85 | 28.100 | 50.724 | 25.698 | 0.00 | 0.00 | H   |
| ATOM | 1333 | HA   | ILE | 85 | 25.686 | 51.649 | 26.839 | 0.00 | 0.00 | H   |
| ATOM | 1334 | HB   | ILE | 85 | 26.429 | 50.960 | 24.007 | 0.00 | 0.00 | H   |
| ATOM | 1335 | HG12 | ILE | 85 | 25.116 | 53.601 | 25.020 | 0.00 | 0.00 | H   |
| ATOM | 1336 | HG13 | ILE | 85 | 26.751 | 53.207 | 25.458 | 0.00 | 0.00 | H   |
| ATOM | 1337 | HG21 | ILE | 85 | 24.072 | 51.953 | 23.481 | 0.00 | 0.00 | H   |
| ATOM | 1338 | HG22 | ILE | 85 | 23.625 | 51.714 | 25.015 | 0.00 | 0.00 | H   |
| ATOM | 1339 | HG23 | ILE | 85 | 24.049 | 50.206 | 24.024 | 0.00 | 0.00 | H   |
| ATOM | 1340 | HD11 | ILE | 85 | 25.823 | 52.967 | 22.616 | 0.00 | 0.00 | H   |
| ATOM | 1341 | HD12 | ILE | 85 | 26.216 | 54.542 | 23.252 | 0.00 | 0.00 | H   |
| ATOM | 1342 | HD13 | ILE | 85 | 27.486 | 53.302 | 23.157 | 0.00 | 0.00 | H   |
| ATOM | 1343 | N    | GLY | 86 | 25.602 | 48.501 | 26.246 | 0.00 | 0.00 | N   |
| ATOM | 1344 | CA   | GLY | 86 | 24.780 | 47.278 | 26.405 | 0.00 | 0.00 | C   |
| ATOM | 1345 | C    | GLY | 86 | 24.659 | 46.883 | 27.910 | 0.00 | 0.00 | C   |
| ATOM | 1346 | O    | GLY | 86 | 23.918 | 45.932 | 28.211 | 0.00 | 0.00 | O   |
| ATOM | 1347 | H    | GLY | 86 | 26.463 | 48.356 | 25.739 | 0.00 | 0.00 | H   |
| ATOM | 1348 | HA2  | GLY | 86 | 23.808 | 47.405 | 25.928 | 0.00 | 0.00 | H   |
| ATOM | 1349 | HA3  | GLY | 86 | 25.209 | 46.382 | 25.957 | 0.00 | 0.00 | H   |
| ATOM | 1350 | N    | ASP | 87 | 25.307 | 47.538 | 28.890 | 0.00 | 0.00 | N   |
| ATOM | 1351 | CA   | ASP | 87 | 25.305 | 47.382 | 30.377 | 0.00 | 0.00 | C   |
| ATOM | 1352 | C    | ASP | 87 | 23.876 | 47.616 | 30.912 | 0.00 | 0.00 | C   |
| ATOM | 1353 | O    | ASP | 87 | 23.462 | 46.907 | 31.850 | 0.00 | 0.00 | O   |
| ATOM | 1354 | CB   | ASP | 87 | 26.255 | 48.467 | 30.896 | 0.00 | 0.00 | C   |
| ATOM | 1355 | CG   | ASP | 87 | 26.543 | 48.178 | 32.324 | 0.00 | 0.00 | C   |
| ATOM | 1356 | OD1  | ASP | 87 | 26.233 | 48.989 | 33.195 | 0.00 | 0.00 | O   |
| ATOM | 1357 | OD2  | ASP | 87 | 27.014 | 47.097 | 32.676 | 0.00 | 0.00 | O1- |
| ATOM | 1358 | H    | ASP | 87 | 25.876 | 48.270 | 28.489 | 0.00 | 0.00 | H   |
| ATOM | 1359 | HA   | ASP | 87 | 25.654 | 46.397 | 30.683 | 0.00 | 0.00 | H   |
| ATOM | 1360 | HB2  | ASP | 87 | 27.160 | 48.410 | 30.291 | 0.00 | 0.00 | H   |
| ATOM | 1361 | HB3  | ASP | 87 | 25.712 | 49.409 | 30.812 | 0.00 | 0.00 | H   |
| ATOM | 1362 | N    | ASP | 88 | 23.087 | 48.392 | 30.223 | 0.00 | 0.00 | N   |
| ATOM | 1363 | CA   | ASP | 88 | 21.767 | 48.765 | 30.530 | 0.00 | 0.00 | C   |
| ATOM | 1364 | C    | ASP | 88 | 20.651 | 47.903 | 29.957 | 0.00 | 0.00 | C   |
| ATOM | 1365 | O    | ASP | 88 | 19.453 | 48.071 | 30.251 | 0.00 | 0.00 | O   |
| ATOM | 1366 | CB   | ASP | 88 | 21.614 | 50.219 | 30.179 | 0.00 | 0.00 | C   |
| ATOM | 1367 | CG   | ASP | 88 | 22.544 | 51.089 | 31.015 | 0.00 | 0.00 | C   |
| ATOM | 1368 | OD1  | ASP | 88 | 22.603 | 50.918 | 32.271 | 0.00 | 0.00 | O   |
| ATOM | 1369 | OD2  | ASP | 88 | 23.091 | 52.072 | 30.477 | 0.00 | 0.00 | O1- |
| ATOM | 1370 | H    | ASP | 88 | 23.505 | 48.657 | 29.342 | 0.00 | 0.00 | H   |
| ATOM | 1371 | HA   | ASP | 88 | 21.718 | 48.701 | 31.617 | 0.00 | 0.00 | H   |
| ATOM | 1372 | HB2  | ASP | 88 | 21.915 | 50.347 | 29.139 | 0.00 | 0.00 | H   |
| ATOM | 1373 | HB3  | ASP | 88 | 20.566 | 50.487 | 30.306 | 0.00 | 0.00 | H   |
| ATOM | 1374 | N    | ILE | 89 | 21.057 | 46.900 | 29.183 | 0.00 | 0.00 | N   |
| ATOM | 1375 | CA   | ILE | 89 | 20.139 | 45.828 | 28.759 | 0.00 | 0.00 | C   |
| ATOM | 1376 | C    | ILE | 89 | 20.565 | 44.435 | 29.269 | 0.00 | 0.00 | C   |
| ATOM | 1377 | O    | ILE | 89 | 20.065 | 43.405 | 28.768 | 0.00 | 0.00 | O   |
| ATOM | 1378 | CB   | ILE | 89 | 19.940 | 45.815 | 27.258 | 0.00 | 0.00 | C   |
| ATOM | 1379 | CG1  | ILE | 89 | 21.310 | 45.564 | 26.477 | 0.00 | 0.00 | C   |
| ATOM | 1380 | CG2  | ILE | 89 | 19.287 | 47.126 | 26.734 | 0.00 | 0.00 | C   |
| ATOM | 1381 | CD1  | ILE | 89 | 21.086 | 45.510 | 24.971 | 0.00 | 0.00 | C   |
| ATOM | 1382 | H    | ILE | 89 | 22.020 | 46.848 | 28.882 | 0.00 | 0.00 | H   |

|      |      |      |     |    |        |        |        |      |      |     |
|------|------|------|-----|----|--------|--------|--------|------|------|-----|
| ATOM | 1383 | HA   | ILE | 89 | 19.196 | 45.925 | 29.298 | 0.00 | 0.00 | H   |
| ATOM | 1384 | HB   | ILE | 89 | 19.252 | 45.024 | 26.959 | 0.00 | 0.00 | H   |
| ATOM | 1385 | HG12 | ILE | 89 | 22.008 | 46.373 | 26.693 | 0.00 | 0.00 | H   |
| ATOM | 1386 | HG13 | ILE | 89 | 21.692 | 44.568 | 26.701 | 0.00 | 0.00 | H   |
| ATOM | 1387 | HG21 | ILE | 89 | 19.941 | 47.992 | 26.641 | 0.00 | 0.00 | H   |
| ATOM | 1388 | HG22 | ILE | 89 | 18.956 | 47.187 | 25.697 | 0.00 | 0.00 | H   |
| ATOM | 1389 | HG23 | ILE | 89 | 18.363 | 47.280 | 27.290 | 0.00 | 0.00 | H   |
| ATOM | 1390 | HD11 | ILE | 89 | 22.060 | 45.371 | 24.504 | 0.00 | 0.00 | H   |
| ATOM | 1391 | HD12 | ILE | 89 | 20.358 | 44.706 | 24.866 | 0.00 | 0.00 | H   |
| ATOM | 1392 | HD13 | ILE | 89 | 20.694 | 46.421 | 24.518 | 0.00 | 0.00 | H   |
| ATOM | 1393 | N    | ASN | 90 | 21.359 | 44.380 | 30.401 | 0.00 | 0.00 | N   |
| ATOM | 1394 | CA   | ASN | 90 | 21.558 | 43.110 | 31.178 | 0.00 | 0.00 | C   |
| ATOM | 1395 | C    | ASN | 90 | 20.370 | 42.850 | 32.163 | 0.00 | 0.00 | C   |
| ATOM | 1396 | O    | ASN | 90 | 20.388 | 41.804 | 32.745 | 0.00 | 0.00 | O   |
| ATOM | 1397 | CB   | ASN | 90 | 22.867 | 43.244 | 31.892 | 0.00 | 0.00 | C   |
| ATOM | 1398 | CG   | ASN | 90 | 23.516 | 41.943 | 32.249 | 0.00 | 0.00 | C   |
| ATOM | 1399 | ND2  | ASN | 90 | 24.710 | 42.100 | 32.806 | 0.00 | 0.00 | N   |
| ATOM | 1400 | OD1  | ASN | 90 | 22.934 | 40.823 | 32.155 | 0.00 | 0.00 | O   |
| ATOM | 1401 | H    | ASN | 90 | 21.620 | 45.275 | 30.790 | 0.00 | 0.00 | H   |
| ATOM | 1402 | HA   | ASN | 90 | 21.591 | 42.239 | 30.525 | 0.00 | 0.00 | H   |
| ATOM | 1403 | HB2  | ASN | 90 | 23.600 | 43.740 | 31.256 | 0.00 | 0.00 | H   |
| ATOM | 1404 | HB3  | ASN | 90 | 22.678 | 43.827 | 32.793 | 0.00 | 0.00 | H   |
| ATOM | 1405 | HD21 | ASN | 90 | 24.968 | 41.196 | 33.173 | 0.00 | 0.00 | H   |
| ATOM | 1406 | HD22 | ASN | 90 | 25.056 | 43.022 | 33.030 | 0.00 | 0.00 | H   |
| ATOM | 1407 | N    | ARG | 91 | 19.529 | 43.820 | 32.418 | 0.00 | 0.00 | N   |
| ATOM | 1408 | CA   | ARG | 91 | 18.172 | 43.754 | 33.050 | 0.00 | 0.00 | C   |
| ATOM | 1409 | C    | ARG | 91 | 17.063 | 43.980 | 31.989 | 0.00 | 0.00 | C   |
| ATOM | 1410 | O    | ARG | 91 | 17.137 | 44.714 | 30.979 | 0.00 | 0.00 | O   |
| ATOM | 1411 | CB   | ARG | 91 | 18.124 | 44.783 | 34.213 | 0.00 | 0.00 | C   |
| ATOM | 1412 | CG   | ARG | 91 | 19.197 | 44.610 | 35.290 | 0.00 | 0.00 | C   |
| ATOM | 1413 | CD   | ARG | 91 | 19.363 | 43.203 | 35.902 | 0.00 | 0.00 | C   |
| ATOM | 1414 | NE   | ARG | 91 | 20.668 | 43.075 | 36.604 | 0.00 | 0.00 | N   |
| ATOM | 1415 | CZ   | ARG | 91 | 21.672 | 42.211 | 36.410 | 0.00 | 0.00 | C   |
| ATOM | 1416 | NH1  | ARG | 91 | 21.937 | 41.603 | 35.296 | 0.00 | 0.00 | N1+ |
| ATOM | 1417 | NH2  | ARG | 91 | 22.433 | 41.821 | 37.445 | 0.00 | 0.00 | N   |
| ATOM | 1418 | H    | ARG | 91 | 19.833 | 44.740 | 32.133 | 0.00 | 0.00 | H   |
| ATOM | 1419 | HA   | ARG | 91 | 18.010 | 42.739 | 33.410 | 0.00 | 0.00 | H   |
| ATOM | 1420 | HB2  | ARG | 91 | 18.118 | 45.798 | 33.818 | 0.00 | 0.00 | H   |
| ATOM | 1421 | HB3  | ARG | 91 | 17.159 | 44.524 | 34.648 | 0.00 | 0.00 | H   |
| ATOM | 1422 | HG2  | ARG | 91 | 20.164 | 44.942 | 34.910 | 0.00 | 0.00 | H   |
| ATOM | 1423 | HG3  | ARG | 91 | 18.929 | 45.236 | 36.141 | 0.00 | 0.00 | H   |
| ATOM | 1424 | HD2  | ARG | 91 | 18.566 | 42.937 | 36.598 | 0.00 | 0.00 | H   |
| ATOM | 1425 | HD3  | ARG | 91 | 19.353 | 42.527 | 35.047 | 0.00 | 0.00 | H   |
| ATOM | 1426 | HE   | ARG | 91 | 20.657 | 43.490 | 37.524 | 0.00 | 0.00 | H   |
| ATOM | 1427 | HH11 | ARG | 91 | 21.424 | 41.590 | 34.425 | 0.00 | 0.00 | H   |
| ATOM | 1428 | HH12 | ARG | 91 | 22.784 | 41.056 | 35.243 | 0.00 | 0.00 | H   |
| ATOM | 1429 | HH21 | ARG | 91 | 22.133 | 42.056 | 38.380 | 0.00 | 0.00 | H   |
| ATOM | 1430 | HH22 | ARG | 91 | 23.047 | 41.020 | 37.484 | 0.00 | 0.00 | H   |
| ATOM | 1431 | N    | ARG | 92 | 15.870 | 43.371 | 32.308 | 0.00 | 0.00 | N   |
| ATOM | 1432 | CA   | ARG | 92 | 14.583 | 43.523 | 31.618 | 0.00 | 0.00 | C   |
| ATOM | 1433 | C    | ARG | 92 | 14.516 | 42.985 | 30.143 | 0.00 | 0.00 | C   |
| ATOM | 1434 | O    | ARG | 92 | 13.434 | 42.551 | 29.684 | 0.00 | 0.00 | O   |
| ATOM | 1435 | CB   | ARG | 92 | 14.110 | 45.017 | 31.758 | 0.00 | 0.00 | C   |
| ATOM | 1436 | CG   | ARG | 92 | 12.747 | 45.335 | 31.093 | 0.00 | 0.00 | C   |
| ATOM | 1437 | CD   | ARG | 92 | 12.842 | 45.695 | 29.553 | 0.00 | 0.00 | C   |
| ATOM | 1438 | NE   | ARG | 92 | 11.519 | 45.832 | 28.883 | 0.00 | 0.00 | N   |
| ATOM | 1439 | CZ   | ARG | 92 | 10.848 | 44.872 | 28.200 | 0.00 | 0.00 | C   |
| ATOM | 1440 | NH1  | ARG | 92 | 11.288 | 43.684 | 28.099 | 0.00 | 0.00 | N1+ |
| ATOM | 1441 | NH2  | ARG | 92 | 9.709  | 45.253 | 27.673 | 0.00 | 0.00 | N   |
| ATOM | 1442 | H    | ARG | 92 | 15.931 | 42.780 | 33.126 | 0.00 | 0.00 | H   |
| ATOM | 1443 | HA   | ARG | 92 | 13.752 | 43.004 | 32.096 | 0.00 | 0.00 | H   |
| ATOM | 1444 | HB2  | ARG | 92 | 14.021 | 45.315 | 32.802 | 0.00 | 0.00 | H   |
| ATOM | 1445 | HB3  | ARG | 92 | 14.842 | 45.709 | 31.340 | 0.00 | 0.00 | H   |
| ATOM | 1446 | HG2  | ARG | 92 | 12.011 | 44.541 | 31.223 | 0.00 | 0.00 | H   |
| ATOM | 1447 | HG3  | ARG | 92 | 12.303 | 46.179 | 31.620 | 0.00 | 0.00 | H   |
| ATOM | 1448 | HD2  | ARG | 92 | 13.268 | 46.691 | 29.422 | 0.00 | 0.00 | H   |
| ATOM | 1449 | HD3  | ARG | 92 | 13.555 | 45.011 | 29.094 | 0.00 | 0.00 | H   |
| ATOM | 1450 | HE   | ARG | 92 | 11.061 | 46.731 | 28.854 | 0.00 | 0.00 | H   |
| ATOM | 1451 | HH11 | ARG | 92 | 12.028 | 43.334 | 28.691 | 0.00 | 0.00 | H   |
| ATOM | 1452 | HH12 | ARG | 92 | 10.830 | 43.027 | 27.484 | 0.00 | 0.00 | H   |
| ATOM | 1453 | HH21 | ARG | 92 | 9.390  | 46.210 | 27.729 | 0.00 | 0.00 | H   |
| ATOM | 1454 | HH22 | ARG | 92 | 8.987  | 44.588 | 27.435 | 0.00 | 0.00 | H   |
| ATOM | 1455 | N    | TYR | 93 | 15.643 | 43.005 | 29.491 | 0.00 | 0.00 | N   |
| ATOM | 1456 | CA   | TYR | 93 | 15.853 | 42.650 | 28.104 | 0.00 | 0.00 | C   |
| ATOM | 1457 | C    | TYR | 93 | 16.627 | 41.318 | 28.008 | 0.00 | 0.00 | C   |
| ATOM | 1458 | O    | TYR | 93 | 16.529 | 40.591 | 27.044 | 0.00 | 0.00 | O   |
| ATOM | 1459 | CB   | TYR | 93 | 16.675 | 43.841 | 27.475 | 0.00 | 0.00 | C   |
| ATOM | 1460 | CG   | TYR | 93 | 15.881 | 45.183 | 27.471 | 0.00 | 0.00 | C   |
| ATOM | 1461 | CD1  | TYR | 93 | 14.829 | 45.303 | 26.601 | 0.00 | 0.00 | C   |
| ATOM | 1462 | CD2  | TYR | 93 | 16.265 | 46.286 | 28.266 | 0.00 | 0.00 | C   |
| ATOM | 1463 | CE1  | TYR | 93 | 14.098 | 46.496 | 26.474 | 0.00 | 0.00 | C   |
| ATOM | 1464 | CE2  | TYR | 93 | 15.569 | 47.505 | 28.173 | 0.00 | 0.00 | C   |
| ATOM | 1465 | CZ   | TYR | 93 | 14.466 | 47.601 | 27.235 | 0.00 | 0.00 | C   |
| ATOM | 1466 | OH   | TYR | 93 | 13.827 | 48.832 | 27.133 | 0.00 | 0.00 | O   |
| ATOM | 1467 | H    | TYR | 93 | 16.473 | 43.211 | 30.029 | 0.00 | 0.00 | H   |
| ATOM | 1468 | HA   | TYR | 93 | 14.904 | 42.630 | 27.568 | 0.00 | 0.00 | H   |
| ATOM | 1469 | HB2  | TYR | 93 | 17.653 | 43.977 | 27.936 | 0.00 | 0.00 | H   |
| ATOM | 1470 | HB3  | TYR | 93 | 16.795 | 43.570 | 26.425 | 0.00 | 0.00 | H   |
| ATOM | 1471 | HD1  | TYR | 93 | 14.598 | 44.503 | 25.912 | 0.00 | 0.00 | H   |
| ATOM | 1472 | HD2  | TYR | 93 | 17.026 | 46.096 | 29.009 | 0.00 | 0.00 | H   |
| ATOM | 1473 | HE1  | TYR | 93 | 13.195 | 46.568 | 25.887 | 0.00 | 0.00 | H   |
| ATOM | 1474 | HE2  | TYR | 93 | 15.829 | 48.375 | 28.759 | 0.00 | 0.00 | H   |
| ATOM | 1475 | HH   | TYR | 93 | 14.109 | 49.457 | 27.805 | 0.00 | 0.00 | H   |
| ATOM | 1476 | N    | ASP | 94 | 17.432 | 40.847 | 28.988 | 0.00 | 0.00 | N   |
| ATOM | 1477 | CA   | ASP | 94 | 18.378 | 39.734 | 28.819 | 0.00 | 0.00 | C   |
| ATOM | 1478 | C    | ASP | 94 | 17.638 | 38.392 | 28.873 | 0.00 | 0.00 | C   |
| ATOM | 1479 | O    | ASP | 94 | 17.910 | 37.536 | 28.054 | 0.00 | 0.00 | O   |
| ATOM | 1480 | CB   | ASP | 94 | 19.480 | 39.812 | 29.870 | 0.00 | 0.00 | C   |
| ATOM | 1481 | CG   | ASP | 94 | 20.436 | 38.604 | 29.550 | 0.00 | 0.00 | C   |
| ATOM | 1482 | OD1  | ASP | 94 | 21.452 | 38.672 | 28.789 | 0.00 | 0.00 | O   |
| ATOM | 1483 | OD2  | ASP | 94 | 20.268 | 37.541 | 30.218 | 0.00 | 0.00 | O1- |
| ATOM | 1484 | H    | ASP | 94 | 17.505 | 41.375 | 29.845 | 0.00 | 0.00 | H   |
| ATOM | 1485 | HA   | ASP | 94 | 18.804 | 39.770 | 27.816 | 0.00 | 0.00 | H   |
| ATOM | 1486 | HB2  | ASP | 94 | 19.992 | 40.762 | 29.717 | 0.00 | 0.00 | H   |
| ATOM | 1487 | HB3  | ASP | 94 | 19.182 | 39.868 | 30.917 | 0.00 | 0.00 | H   |

|      |      |      |     |     |        |        |        |      |      |     |
|------|------|------|-----|-----|--------|--------|--------|------|------|-----|
| ATOM | 1488 | N    | SER | 95  | 16.606 | 38.226 | 29.724 | 0.00 | 0.00 | N   |
| ATOM | 1489 | CA   | SER | 95  | 15.755 | 37.034 | 29.594 | 0.00 | 0.00 | C   |
| ATOM | 1490 | C    | SER | 95  | 14.833 | 37.020 | 28.313 | 0.00 | 0.00 | C   |
| ATOM | 1491 | O    | SER | 95  | 14.337 | 35.920 | 27.958 | 0.00 | 0.00 | O   |
| ATOM | 1492 | CB   | SER | 95  | 14.940 | 36.758 | 30.872 | 0.00 | 0.00 | C   |
| ATOM | 1493 | OG   | SER | 95  | 14.609 | 35.412 | 30.957 | 0.00 | 0.00 | O   |
| ATOM | 1494 | H    | SER | 95  | 16.167 | 38.946 | 30.279 | 0.00 | 0.00 | H   |
| ATOM | 1495 | HA   | SER | 95  | 16.429 | 36.180 | 29.530 | 0.00 | 0.00 | H   |
| ATOM | 1496 | HB2  | SER | 95  | 15.603 | 36.938 | 31.719 | 0.00 | 0.00 | H   |
| ATOM | 1497 | HB3  | SER | 95  | 14.044 | 37.375 | 30.950 | 0.00 | 0.00 | H   |
| ATOM | 1498 | HG   | SER | 95  | 15.376 | 34.892 | 31.206 | 0.00 | 0.00 | H   |
| ATOM | 1499 | N    | GLU | 96  | 14.630 | 38.138 | 27.649 | 0.00 | 0.00 | N   |
| ATOM | 1500 | CA   | GLU | 96  | 13.943 | 38.157 | 26.370 | 0.00 | 0.00 | C   |
| ATOM | 1501 | C    | GLU | 96  | 14.910 | 37.758 | 25.290 | 0.00 | 0.00 | C   |
| ATOM | 1502 | O    | GLU | 96  | 14.550 | 36.782 | 24.604 | 0.00 | 0.00 | O   |
| ATOM | 1503 | CB   | GLU | 96  | 13.275 | 39.473 | 25.972 | 0.00 | 0.00 | C   |
| ATOM | 1504 | CG   | GLU | 96  | 12.138 | 39.902 | 26.915 | 0.00 | 0.00 | C   |
| ATOM | 1505 | CD   | GLU | 96  | 10.954 | 38.909 | 27.160 | 0.00 | 0.00 | C   |
| ATOM | 1506 | OE1  | GLU | 96  | 10.498 | 38.316 | 26.181 | 0.00 | 0.00 | O   |
| ATOM | 1507 | OE2  | GLU | 96  | 10.494 | 38.750 | 28.320 | 0.00 | 0.00 | O1- |
| ATOM | 1508 | H    | GLU | 96  | 15.130 | 38.942 | 28.000 | 0.00 | 0.00 | H   |
| ATOM | 1509 | HA   | GLU | 96  | 13.163 | 37.400 | 26.297 | 0.00 | 0.00 | H   |
| ATOM | 1510 | HB2  | GLU | 96  | 14.059 | 40.227 | 25.895 | 0.00 | 0.00 | H   |
| ATOM | 1511 | HB3  | GLU | 96  | 12.910 | 39.380 | 24.949 | 0.00 | 0.00 | H   |
| ATOM | 1512 | HG2  | GLU | 96  | 12.608 | 40.111 | 27.876 | 0.00 | 0.00 | H   |
| ATOM | 1513 | HG3  | GLU | 96  | 11.740 | 40.861 | 26.586 | 0.00 | 0.00 | H   |
| ATOM | 1514 | N    | PHE | 97  | 16.137 | 38.146 | 25.307 | 0.00 | 0.00 | N   |
| ATOM | 1515 | CA   | PHE | 97  | 17.228 | 37.595 | 24.481 | 0.00 | 0.00 | C   |
| ATOM | 1516 | C    | PHE | 97  | 17.584 | 36.120 | 24.814 | 0.00 | 0.00 | C   |
| ATOM | 1517 | O    | PHE | 97  | 18.095 | 35.407 | 23.983 | 0.00 | 0.00 | O   |
| ATOM | 1518 | CB   | PHE | 97  | 18.457 | 38.477 | 24.482 | 0.00 | 0.00 | C   |
| ATOM | 1519 | CG   | PHE | 97  | 18.283 | 39.933 | 24.192 | 0.00 | 0.00 | C   |
| ATOM | 1520 | CD1  | PHE | 97  | 17.443 | 40.194 | 23.103 | 0.00 | 0.00 | C   |
| ATOM | 1521 | CD2  | PHE | 97  | 18.812 | 40.945 | 24.997 | 0.00 | 0.00 | C   |
| ATOM | 1522 | CE1  | PHE | 97  | 17.115 | 41.550 | 22.711 | 0.00 | 0.00 | C   |
| ATOM | 1523 | CE2  | PHE | 97  | 18.537 | 42.268 | 24.591 | 0.00 | 0.00 | C   |
| ATOM | 1524 | CZ   | PHE | 97  | 17.683 | 42.566 | 23.487 | 0.00 | 0.00 | C   |
| ATOM | 1525 | H    | PHE | 97  | 16.288 | 39.012 | 25.806 | 0.00 | 0.00 | H   |
| ATOM | 1526 | HA   | PHE | 97  | 16.910 | 37.675 | 23.442 | 0.00 | 0.00 | H   |
| ATOM | 1527 | HB2  | PHE | 97  | 18.933 | 38.412 | 25.461 | 0.00 | 0.00 | H   |
| ATOM | 1528 | HB3  | PHE | 97  | 19.075 | 38.080 | 23.677 | 0.00 | 0.00 | H   |
| ATOM | 1529 | HD1  | PHE | 97  | 17.121 | 39.358 | 22.501 | 0.00 | 0.00 | H   |
| ATOM | 1530 | HD2  | PHE | 97  | 19.386 | 40.802 | 25.901 | 0.00 | 0.00 | H   |
| ATOM | 1531 | HE1  | PHE | 97  | 16.401 | 41.777 | 21.934 | 0.00 | 0.00 | H   |
| ATOM | 1532 | HE2  | PHE | 97  | 18.963 | 43.033 | 25.224 | 0.00 | 0.00 | H   |
| ATOM | 1533 | HZ   | PHE | 97  | 17.467 | 43.590 | 23.218 | 0.00 | 0.00 | H   |
| ATOM | 1534 | N    | GLN | 98  | 17.172 | 35.640 | 25.983 | 0.00 | 0.00 | N   |
| ATOM | 1535 | CA   | GLN | 98  | 17.275 | 34.175 | 26.402 | 0.00 | 0.00 | C   |
| ATOM | 1536 | C    | GLN | 98  | 16.016 | 33.446 | 25.805 | 0.00 | 0.00 | C   |
| ATOM | 1537 | O    | GLN | 98  | 16.137 | 32.314 | 25.308 | 0.00 | 0.00 | O   |
| ATOM | 1538 | CB   | GLN | 98  | 17.465 | 33.922 | 27.870 | 0.00 | 0.00 | C   |
| ATOM | 1539 | CG   | GLN | 98  | 18.194 | 32.629 | 28.169 | 0.00 | 0.00 | C   |
| ATOM | 1540 | CD   | GLN | 98  | 19.529 | 32.328 | 27.573 | 0.00 | 0.00 | C   |
| ATOM | 1541 | NE2  | GLN | 98  | 20.441 | 33.256 | 27.516 | 0.00 | 0.00 | N   |
| ATOM | 1542 | OE1  | GLN | 98  | 19.851 | 31.207 | 27.126 | 0.00 | 0.00 | O   |
| ATOM | 1543 | H    | GLN | 98  | 16.772 | 36.282 | 26.652 | 0.00 | 0.00 | H   |
| ATOM | 1544 | HA   | GLN | 98  | 18.135 | 33.785 | 25.858 | 0.00 | 0.00 | H   |
| ATOM | 1545 | HB2  | GLN | 98  | 17.874 | 34.769 | 28.421 | 0.00 | 0.00 | H   |
| ATOM | 1546 | HB3  | GLN | 98  | 16.474 | 33.881 | 28.322 | 0.00 | 0.00 | H   |
| ATOM | 1547 | HG2  | GLN | 98  | 18.447 | 32.561 | 29.227 | 0.00 | 0.00 | H   |
| ATOM | 1548 | HG3  | GLN | 98  | 17.470 | 31.870 | 27.873 | 0.00 | 0.00 | H   |
| ATOM | 1549 | HE21 | GLN | 98  | 21.356 | 33.110 | 27.114 | 0.00 | 0.00 | H   |
| ATOM | 1550 | HE22 | GLN | 98  | 20.141 | 34.199 | 27.719 | 0.00 | 0.00 | H   |
| ATOM | 1551 | N    | THR | 99  | 14.887 | 34.079 | 25.747 | 0.00 | 0.00 | N   |
| ATOM | 1552 | CA   | THR | 99  | 13.724 | 33.537 | 25.029 | 0.00 | 0.00 | C   |
| ATOM | 1553 | C    | THR | 99  | 13.857 | 33.410 | 23.477 | 0.00 | 0.00 | C   |
| ATOM | 1554 | O    | THR | 99  | 13.495 | 32.410 | 22.882 | 0.00 | 0.00 | O   |
| ATOM | 1555 | CB   | THR | 99  | 12.457 | 34.270 | 25.355 | 0.00 | 0.00 | C   |
| ATOM | 1556 | CG2  | THR | 99  | 11.239 | 33.634 | 24.838 | 0.00 | 0.00 | C   |
| ATOM | 1557 | OG1  | THR | 99  | 12.389 | 34.471 | 26.721 | 0.00 | 0.00 | O   |
| ATOM | 1558 | H    | THR | 99  | 14.862 | 34.966 | 26.228 | 0.00 | 0.00 | H   |
| ATOM | 1559 | HA   | THR | 99  | 13.454 | 32.542 | 25.382 | 0.00 | 0.00 | H   |
| ATOM | 1560 | HB   | THR | 99  | 12.409 | 35.292 | 24.980 | 0.00 | 0.00 | H   |
| ATOM | 1561 | HG1  | THR | 99  | 13.235 | 34.701 | 27.114 | 0.00 | 0.00 | H   |
| ATOM | 1562 | HG21 | THR | 99  | 10.421 | 34.201 | 25.283 | 0.00 | 0.00 | H   |
| ATOM | 1563 | HG22 | THR | 99  | 11.179 | 33.834 | 23.769 | 0.00 | 0.00 | H   |
| ATOM | 1564 | HG23 | THR | 99  | 11.289 | 32.561 | 25.025 | 0.00 | 0.00 | H   |
| ATOM | 1565 | N    | MET | 100 | 14.487 | 34.405 | 22.849 | 0.00 | 0.00 | N   |
| ATOM | 1566 | CA   | MET | 100 | 14.958 | 34.400 | 21.448 | 0.00 | 0.00 | C   |
| ATOM | 1567 | C    | MET | 100 | 16.065 | 33.356 | 21.180 | 0.00 | 0.00 | C   |
| ATOM | 1568 | O    | MET | 100 | 16.395 | 33.183 | 20.047 | 0.00 | 0.00 | O   |
| ATOM | 1569 | CB   | MET | 100 | 15.422 | 35.789 | 21.041 | 0.00 | 0.00 | C   |
| ATOM | 1570 | CG   | MET | 100 | 14.292 | 36.786 | 21.087 | 0.00 | 0.00 | C   |
| ATOM | 1571 | SD   | MET | 100 | 14.614 | 38.541 | 20.767 | 0.00 | 0.00 | S   |
| ATOM | 1572 | CE   | MET | 100 | 13.027 | 39.093 | 21.262 | 0.00 | 0.00 | C   |
| ATOM | 1573 | H    | MET | 100 | 14.599 | 35.218 | 23.437 | 0.00 | 0.00 | H   |
| ATOM | 1574 | HA   | MET | 100 | 14.138 | 34.068 | 20.809 | 0.00 | 0.00 | H   |
| ATOM | 1575 | HB2  | MET | 100 | 16.201 | 36.102 | 21.737 | 0.00 | 0.00 | H   |
| ATOM | 1576 | HB3  | MET | 100 | 16.004 | 35.724 | 20.123 | 0.00 | 0.00 | H   |
| ATOM | 1577 | HG2  | MET | 100 | 13.517 | 36.392 | 20.430 | 0.00 | 0.00 | H   |
| ATOM | 1578 | HG3  | MET | 100 | 13.909 | 36.705 | 22.105 | 0.00 | 0.00 | H   |
| ATOM | 1579 | HE1  | MET | 100 | 12.753 | 38.631 | 22.210 | 0.00 | 0.00 | H   |
| ATOM | 1580 | HE2  | MET | 100 | 13.137 | 40.170 | 21.386 | 0.00 | 0.00 | H   |
| ATOM | 1581 | HE3  | MET | 100 | 12.310 | 38.852 | 20.477 | 0.00 | 0.00 | H   |
| ATOM | 1582 | N    | LEU | 101 | 16.353 | 32.626 | 22.186 | 0.00 | 0.00 | N   |
| ATOM | 1583 | CA   | LEU | 101 | 17.415 | 31.428 | 22.131 | 0.00 | 0.00 | C   |
| ATOM | 1584 | C    | LEU | 101 | 16.666 | 30.139 | 22.471 | 0.00 | 0.00 | C   |
| ATOM | 1585 | O    | LEU | 101 | 17.288 | 29.055 | 22.440 | 0.00 | 0.00 | O   |
| ATOM | 1586 | CB   | LEU | 101 | 18.589 | 31.692 | 23.108 | 0.00 | 0.00 | C   |
| ATOM | 1587 | CG   | LEU | 101 | 19.499 | 32.820 | 22.669 | 0.00 | 0.00 | C   |
| ATOM | 1588 | CD1  | LEU | 101 | 20.330 | 33.143 | 23.921 | 0.00 | 0.00 | C   |
| ATOM | 1589 | CD2  | LEU | 101 | 20.431 | 32.418 | 21.605 | 0.00 | 0.00 | C   |
| ATOM | 1590 | H    | LEU | 101 | 16.301 | 32.923 | 23.117 | 0.00 | 0.00 | H   |
| ATOM | 1591 | HA   | LEU | 101 | 17.952 | 31.326 | 21.188 | 0.00 | 0.00 | H   |
| ATOM | 1592 | HB2  | LEU | 101 | 18.195 | 31.914 | 24.100 | 0.00 | 0.00 | H   |

|      |      |      |     |     |        |        |        |      |      |     |
|------|------|------|-----|-----|--------|--------|--------|------|------|-----|
| ATOM | 1593 | HB3  | LEU | 101 | 19.178 | 30.786 | 23.250 | 0.00 | 0.00 | H   |
| ATOM | 1594 | HG   | LEU | 101 | 18.908 | 33.661 | 22.307 | 0.00 | 0.00 | H   |
| ATOM | 1595 | HD11 | LEU | 101 | 20.755 | 32.316 | 24.491 | 0.00 | 0.00 | H   |
| ATOM | 1596 | HD12 | LEU | 101 | 19.861 | 33.725 | 24.715 | 0.00 | 0.00 | H   |
| ATOM | 1597 | HD13 | LEU | 101 | 21.183 | 33.786 | 23.708 | 0.00 | 0.00 | H   |
| ATOM | 1598 | HD21 | LEU | 101 | 19.749 | 32.175 | 20.790 | 0.00 | 0.00 | H   |
| ATOM | 1599 | HD22 | LEU | 101 | 21.175 | 33.144 | 21.278 | 0.00 | 0.00 | H   |
| ATOM | 1600 | HD23 | LEU | 101 | 20.999 | 31.502 | 21.771 | 0.00 | 0.00 | H   |
| ATOM | 1601 | N    | GLN | 102 | 15.353 | 30.241 | 22.778 | 0.00 | 0.00 | N   |
| ATOM | 1602 | CA   | GLN | 102 | 14.699 | 29.010 | 23.241 | 0.00 | 0.00 | C   |
| ATOM | 1603 | C    | GLN | 102 | 14.633 | 27.857 | 22.229 | 0.00 | 0.00 | C   |
| ATOM | 1604 | O    | GLN | 102 | 14.663 | 26.644 | 22.548 | 0.00 | 0.00 | O   |
| ATOM | 1605 | CB   | GLN | 102 | 13.341 | 29.497 | 23.805 | 0.00 | 0.00 | C   |
| ATOM | 1606 | CG   | GLN | 102 | 12.542 | 28.459 | 24.502 | 0.00 | 0.00 | C   |
| ATOM | 1607 | CD   | GLN | 102 | 11.121 | 28.883 | 24.827 | 0.00 | 0.00 | C   |
| ATOM | 1608 | NE2  | GLN | 102 | 10.246 | 28.059 | 25.251 | 0.00 | 0.00 | N   |
| ATOM | 1609 | OE1  | GLN | 102 | 10.796 | 30.062 | 24.719 | 0.00 | 0.00 | O   |
| ATOM | 1610 | H    | GLN | 102 | 14.846 | 31.114 | 22.739 | 0.00 | 0.00 | H   |
| ATOM | 1611 | HA   | GLN | 102 | 15.296 | 28.615 | 24.064 | 0.00 | 0.00 | H   |
| ATOM | 1612 | HB2  | GLN | 102 | 13.643 | 30.296 | 24.481 | 0.00 | 0.00 | H   |
| ATOM | 1613 | HB3  | GLN | 102 | 12.736 | 29.962 | 23.025 | 0.00 | 0.00 | H   |
| ATOM | 1614 | HG2  | GLN | 102 | 12.525 | 27.583 | 23.854 | 0.00 | 0.00 | H   |
| ATOM | 1615 | HG3  | GLN | 102 | 13.034 | 28.035 | 25.377 | 0.00 | 0.00 | H   |
| ATOM | 1616 | HE21 | GLN | 102 | 9.385  | 28.375 | 25.673 | 0.00 | 0.00 | H   |
| ATOM | 1617 | HE22 | GLN | 102 | 10.503 | 27.089 | 25.360 | 0.00 | 0.00 | H   |
| ATOM | 1618 | N    | HIP | 103 | 14.381 | 28.288 | 20.958 | 0.00 | 0.00 | N   |
| ATOM | 1619 | CA   | HIP | 103 | 13.900 | 27.441 | 19.877 | 0.00 | 0.00 | C   |
| ATOM | 1620 | C    | HIP | 103 | 14.842 | 27.387 | 18.674 | 0.00 | 0.00 | C   |
| ATOM | 1621 | O    | HIP | 103 | 14.718 | 28.068 | 17.619 | 0.00 | 0.00 | O   |
| ATOM | 1622 | CB   | HIP | 103 | 12.484 | 27.995 | 19.440 | 0.00 | 0.00 | C   |
| ATOM | 1623 | CG   | HIP | 103 | 11.343 | 27.515 | 20.431 | 0.00 | 0.00 | C   |
| ATOM | 1624 | CD2  | HIP | 103 | 10.477 | 28.225 | 21.235 | 0.00 | 0.00 | C   |
| ATOM | 1625 | ND1  | HIP | 103 | 10.995 | 26.208 | 20.615 | 0.00 | 0.00 | N1+ |
| ATOM | 1626 | CE1  | HIP | 103 | 9.980  | 26.166 | 21.477 | 0.00 | 0.00 | C   |
| ATOM | 1627 | NE2  | HIP | 103 | 9.694  | 27.400 | 21.959 | 0.00 | 0.00 | N   |
| ATOM | 1628 | H    | HIP | 103 | 14.427 | 29.283 | 20.794 | 0.00 | 0.00 | H   |
| ATOM | 1629 | HA   | HIP | 103 | 13.781 | 26.424 | 20.249 | 0.00 | 0.00 | H   |
| ATOM | 1630 | HB2  | HIP | 103 | 12.458 | 29.084 | 19.480 | 0.00 | 0.00 | H   |
| ATOM | 1631 | HB3  | HIP | 103 | 12.284 | 27.624 | 18.435 | 0.00 | 0.00 | H   |
| ATOM | 1632 | HD1  | HIP | 103 | 11.456 | 25.408 | 20.208 | 0.00 | 0.00 | H   |
| ATOM | 1633 | HD2  | HIP | 103 | 10.403 | 29.303 | 21.224 | 0.00 | 0.00 | H   |
| ATOM | 1634 | HE1  | HIP | 103 | 9.631  | 25.286 | 21.997 | 0.00 | 0.00 | H   |
| ATOM | 1635 | HE2  | HIP | 103 | 8.905  | 27.676 | 22.526 | 0.00 | 0.00 | H   |
| ATOM | 1636 | N    | LEU | 104 | 15.987 | 26.714 | 18.871 | 0.00 | 0.00 | N   |
| ATOM | 1637 | CA   | LEU | 104 | 17.090 | 26.571 | 17.976 | 0.00 | 0.00 | C   |
| ATOM | 1638 | C    | LEU | 104 | 17.509 | 25.095 | 17.827 | 0.00 | 0.00 | C   |
| ATOM | 1639 | O    | LEU | 104 | 17.444 | 24.237 | 18.747 | 0.00 | 0.00 | O   |
| ATOM | 1640 | CB   | LEU | 104 | 18.266 | 27.442 | 18.458 | 0.00 | 0.00 | C   |
| ATOM | 1641 | CG   | LEU | 104 | 18.290 | 28.955 | 18.228 | 0.00 | 0.00 | C   |
| ATOM | 1642 | CD1  | LEU | 104 | 19.352 | 29.655 | 19.120 | 0.00 | 0.00 | C   |
| ATOM | 1643 | CD2  | LEU | 104 | 18.597 | 29.198 | 16.714 | 0.00 | 0.00 | C   |
| ATOM | 1644 | H    | LEU | 104 | 16.112 | 26.389 | 19.818 | 0.00 | 0.00 | H   |
| ATOM | 1645 | HA   | LEU | 104 | 16.728 | 26.916 | 17.008 | 0.00 | 0.00 | H   |
| ATOM | 1646 | HB2  | LEU | 104 | 18.438 | 27.237 | 19.515 | 0.00 | 0.00 | H   |
| ATOM | 1647 | HB3  | LEU | 104 | 19.194 | 27.016 | 18.080 | 0.00 | 0.00 | H   |
| ATOM | 1648 | HG   | LEU | 104 | 17.299 | 29.373 | 18.398 | 0.00 | 0.00 | H   |
| ATOM | 1649 | HD11 | LEU | 104 | 18.983 | 29.778 | 20.138 | 0.00 | 0.00 | H   |
| ATOM | 1650 | HD12 | LEU | 104 | 20.342 | 29.203 | 19.178 | 0.00 | 0.00 | H   |
| ATOM | 1651 | HD13 | LEU | 104 | 19.336 | 30.682 | 18.754 | 0.00 | 0.00 | H   |
| ATOM | 1652 | HD21 | LEU | 104 | 18.013 | 28.539 | 16.071 | 0.00 | 0.00 | H   |
| ATOM | 1653 | HD22 | LEU | 104 | 18.268 | 30.200 | 16.438 | 0.00 | 0.00 | H   |
| ATOM | 1654 | HD23 | LEU | 104 | 19.664 | 29.051 | 16.550 | 0.00 | 0.00 | H   |
| ATOM | 1655 | N    | GLN | 105 | 18.021 | 24.811 | 16.596 | 0.00 | 0.00 | N   |
| ATOM | 1656 | CA   | GLN | 105 | 18.908 | 23.604 | 16.309 | 0.00 | 0.00 | C   |
| ATOM | 1657 | C    | GLN | 105 | 20.446 | 23.859 | 16.308 | 0.00 | 0.00 | C   |
| ATOM | 1658 | O    | GLN | 105 | 20.771 | 25.029 | 16.167 | 0.00 | 0.00 | O   |
| ATOM | 1659 | CB   | GLN | 105 | 18.502 | 22.948 | 14.976 | 0.00 | 0.00 | C   |
| ATOM | 1660 | CG   | GLN | 105 | 17.012 | 22.646 | 14.754 | 0.00 | 0.00 | C   |
| ATOM | 1661 | CD   | GLN | 105 | 16.416 | 21.621 | 15.733 | 0.00 | 0.00 | C   |
| ATOM | 1662 | NE2  | GLN | 105 | 16.070 | 20.432 | 15.196 | 0.00 | 0.00 | N   |
| ATOM | 1663 | OE1  | GLN | 105 | 16.348 | 21.783 | 16.953 | 0.00 | 0.00 | O   |
| ATOM | 1664 | H    | GLN | 105 | 18.068 | 25.571 | 15.933 | 0.00 | 0.00 | H   |
| ATOM | 1665 | HA   | GLN | 105 | 18.584 | 22.828 | 17.001 | 0.00 | 0.00 | H   |
| ATOM | 1666 | HB2  | GLN | 105 | 18.790 | 23.706 | 14.248 | 0.00 | 0.00 | H   |
| ATOM | 1667 | HB3  | GLN | 105 | 18.981 | 21.971 | 14.912 | 0.00 | 0.00 | H   |
| ATOM | 1668 | HG2  | GLN | 105 | 16.494 | 23.549 | 15.076 | 0.00 | 0.00 | H   |
| ATOM | 1669 | HG3  | GLN | 105 | 16.846 | 22.446 | 13.696 | 0.00 | 0.00 | H   |
| ATOM | 1670 | HE21 | GLN | 105 | 15.664 | 19.744 | 15.813 | 0.00 | 0.00 | H   |
| ATOM | 1671 | HE22 | GLN | 105 | 16.070 | 20.301 | 14.195 | 0.00 | 0.00 | H   |
| ATOM | 1672 | N    | PRO | 106 | 21.393 | 22.906 | 16.513 | 0.00 | 0.00 | N   |
| ATOM | 1673 | CA   | PRO | 106 | 22.723 | 23.127 | 17.062 | 0.00 | 0.00 | C   |
| ATOM | 1674 | C    | PRO | 106 | 23.764 | 23.824 | 16.190 | 0.00 | 0.00 | C   |
| ATOM | 1675 | O    | PRO | 106 | 24.928 | 24.006 | 16.590 | 0.00 | 0.00 | O   |
| ATOM | 1676 | CB   | PRO | 106 | 23.239 | 21.818 | 17.610 | 0.00 | 0.00 | C   |
| ATOM | 1677 | CG   | PRO | 106 | 21.925 | 21.089 | 17.854 | 0.00 | 0.00 | C   |
| ATOM | 1678 | CD   | PRO | 106 | 21.134 | 21.487 | 16.677 | 0.00 | 0.00 | C   |
| ATOM | 1679 | HA   | PRO | 106 | 22.518 | 23.676 | 17.980 | 0.00 | 0.00 | H   |
| ATOM | 1680 | HB2  | PRO | 106 | 23.794 | 21.860 | 18.547 | 0.00 | 0.00 | H   |
| ATOM | 1681 | HB3  | PRO | 106 | 23.837 | 21.311 | 16.852 | 0.00 | 0.00 | H   |
| ATOM | 1682 | HG2  | PRO | 106 | 22.001 | 20.004 | 17.911 | 0.00 | 0.00 | H   |
| ATOM | 1683 | HG3  | PRO | 106 | 21.388 | 21.501 | 18.710 | 0.00 | 0.00 | H   |
| ATOM | 1684 | HD2  | PRO | 106 | 21.587 | 21.061 | 15.781 | 0.00 | 0.00 | H   |
| ATOM | 1685 | HD3  | PRO | 106 | 20.088 | 21.230 | 16.846 | 0.00 | 0.00 | H   |
| ATOM | 1686 | N    | THR | 107 | 23.409 | 24.436 | 15.061 | 0.00 | 0.00 | N   |
| ATOM | 1687 | CA   | THR | 107 | 24.295 | 25.060 | 14.079 | 0.00 | 0.00 | C   |
| ATOM | 1688 | C    | THR | 107 | 24.286 | 26.558 | 14.095 | 0.00 | 0.00 | C   |
| ATOM | 1689 | O    | THR | 107 | 23.329 | 27.360 | 14.260 | 0.00 | 0.00 | O   |
| ATOM | 1690 | CB   | THR | 107 | 23.899 | 24.526 | 12.640 | 0.00 | 0.00 | C   |
| ATOM | 1691 | CG2  | THR | 107 | 24.159 | 22.988 | 12.469 | 0.00 | 0.00 | C   |
| ATOM | 1692 | OG1  | THR | 107 | 22.502 | 24.600 | 12.407 | 0.00 | 0.00 | O   |
| ATOM | 1693 | H    | THR | 107 | 22.468 | 24.278 | 14.728 | 0.00 | 0.00 | H   |
| ATOM | 1694 | HA   | THR | 107 | 25.276 | 24.610 | 14.229 | 0.00 | 0.00 | H   |
| ATOM | 1695 | HB   | THR | 107 | 24.429 | 25.103 | 11.881 | 0.00 | 0.00 | H   |
| ATOM | 1696 | HG1  | THR | 107 | 22.452 | 23.985 | 11.671 | 0.00 | 0.00 | H   |
| ATOM | 1697 | HG21 | THR | 107 | 25.182 | 22.790 | 12.788 | 0.00 | 0.00 | H   |

|      |      |      |     |     |        |        |        |      |      |     |
|------|------|------|-----|-----|--------|--------|--------|------|------|-----|
| ATOM | 1698 | HG22 | THR | 107 | 23.455 | 22.397 | 13.055 | 0.00 | 0.00 | H   |
| ATOM | 1699 | HG23 | THR | 107 | 24.099 | 22.751 | 11.408 | 0.00 | 0.00 | H   |
| ATOM | 1700 | N    | ALA | 108 | 25.493 | 26.973 | 13.676 | 0.00 | 0.00 | N   |
| ATOM | 1701 | CA   | ALA | 108 | 25.780 | 28.328 | 13.248 | 0.00 | 0.00 | C   |
| ATOM | 1702 | C    | ALA | 108 | 24.863 | 28.767 | 12.099 | 0.00 | 0.00 | C   |
| ATOM | 1703 | O    | ALA | 108 | 24.240 | 29.807 | 12.103 | 0.00 | 0.00 | O   |
| ATOM | 1704 | CB   | ALA | 108 | 27.314 | 28.597 | 13.028 | 0.00 | 0.00 | C   |
| ATOM | 1705 | H    | ALA | 108 | 26.185 | 26.252 | 13.529 | 0.00 | 0.00 | H   |
| ATOM | 1706 | HA   | ALA | 108 | 25.532 | 28.958 | 14.102 | 0.00 | 0.00 | H   |
| ATOM | 1707 | HB1  | ALA | 108 | 27.354 | 29.488 | 12.401 | 0.00 | 0.00 | H   |
| ATOM | 1708 | HB2  | ALA | 108 | 27.857 | 28.683 | 13.969 | 0.00 | 0.00 | H   |
| ATOM | 1709 | HB3  | ALA | 108 | 27.681 | 27.767 | 12.424 | 0.00 | 0.00 | H   |
| ATOM | 1710 | N    | GLU | 109 | 24.567 | 27.814 | 11.188 | 0.00 | 0.00 | N   |
| ATOM | 1711 | CA   | GLU | 109 | 23.565 | 27.867 | 10.144 | 0.00 | 0.00 | C   |
| ATOM | 1712 | C    | GLU | 109 | 22.090 | 28.019 | 10.703 | 0.00 | 0.00 | C   |
| ATOM | 1713 | O    | GLU | 109 | 21.356 | 28.977 | 10.212 | 0.00 | 0.00 | O   |
| ATOM | 1714 | CB   | GLU | 109 | 23.601 | 26.617 | 9.258  | 0.00 | 0.00 | C   |
| ATOM | 1715 | CG   | GLU | 109 | 22.637 | 26.640 | 8.092  | 0.00 | 0.00 | C   |
| ATOM | 1716 | CD   | GLU | 109 | 23.012 | 25.513 | 7.097  | 0.00 | 0.00 | C   |
| ATOM | 1717 | OE1  | GLU | 109 | 23.609 | 25.718 | 6.009  | 0.00 | 0.00 | O   |
| ATOM | 1718 | OE2  | GLU | 109 | 22.834 | 24.320 | 7.476  | 0.00 | 0.00 | O1- |
| ATOM | 1719 | H    | GLU | 109 | 24.983 | 26.901 | 11.296 | 0.00 | 0.00 | H   |
| ATOM | 1720 | HA   | GLU | 109 | 23.739 | 28.734 | 9.506  | 0.00 | 0.00 | H   |
| ATOM | 1721 | HB2  | GLU | 109 | 24.550 | 26.588 | 8.724  | 0.00 | 0.00 | H   |
| ATOM | 1722 | HB3  | GLU | 109 | 23.543 | 25.763 | 9.933  | 0.00 | 0.00 | H   |
| ATOM | 1723 | HG2  | GLU | 109 | 21.576 | 26.604 | 8.338  | 0.00 | 0.00 | H   |
| ATOM | 1724 | HG3  | GLU | 109 | 22.868 | 27.622 | 7.678  | 0.00 | 0.00 | H   |
| ATOM | 1725 | N    | ASN | 110 | 21.633 | 27.247 | 11.768 | 0.00 | 0.00 | N   |
| ATOM | 1726 | CA   | ASN | 110 | 20.278 | 27.435 | 12.304 | 0.00 | 0.00 | C   |
| ATOM | 1727 | C    | ASN | 110 | 20.200 | 28.774 | 13.103 | 0.00 | 0.00 | C   |
| ATOM | 1728 | O    | ASN | 110 | 19.108 | 29.436 | 13.024 | 0.00 | 0.00 | O   |
| ATOM | 1729 | CB   | ASN | 110 | 19.825 | 26.162 | 13.021 | 0.00 | 0.00 | C   |
| ATOM | 1730 | CG   | ASN | 110 | 18.337 | 26.230 | 13.296 | 0.00 | 0.00 | C   |
| ATOM | 1731 | ND2  | ASN | 110 | 17.440 | 25.666 | 12.505 | 0.00 | 0.00 | N   |
| ATOM | 1732 | OD1  | ASN | 110 | 17.933 | 26.634 | 14.373 | 0.00 | 0.00 | O   |
| ATOM | 1733 | H    | ASN | 110 | 22.182 | 26.445 | 12.045 | 0.00 | 0.00 | H   |
| ATOM | 1734 | HA   | ASN | 110 | 19.604 | 27.547 | 11.454 | 0.00 | 0.00 | H   |
| ATOM | 1735 | HB2  | ASN | 110 | 19.991 | 25.328 | 12.340 | 0.00 | 0.00 | H   |
| ATOM | 1736 | HB3  | ASN | 110 | 20.334 | 26.052 | 13.979 | 0.00 | 0.00 | H   |
| ATOM | 1737 | HD21 | ASN | 110 | 16.511 | 26.024 | 12.672 | 0.00 | 0.00 | H   |
| ATOM | 1738 | HD22 | ASN | 110 | 17.713 | 25.220 | 11.641 | 0.00 | 0.00 | H   |
| ATOM | 1739 | N    | ALA | 111 | 21.277 | 29.192 | 13.696 | 0.00 | 0.00 | N   |
| ATOM | 1740 | CA   | ALA | 111 | 21.307 | 30.453 | 14.362 | 0.00 | 0.00 | C   |
| ATOM | 1741 | C    | ALA | 111 | 21.097 | 31.576 | 13.327 | 0.00 | 0.00 | C   |
| ATOM | 1742 | O    | ALA | 111 | 20.426 | 32.556 | 13.656 | 0.00 | 0.00 | O   |
| ATOM | 1743 | CB   | ALA | 111 | 22.678 | 30.608 | 15.090 | 0.00 | 0.00 | C   |
| ATOM | 1744 | H    | ALA | 111 | 22.077 | 28.584 | 13.793 | 0.00 | 0.00 | H   |
| ATOM | 1745 | HA   | ALA | 111 | 20.633 | 30.433 | 15.220 | 0.00 | 0.00 | H   |
| ATOM | 1746 | HB1  | ALA | 111 | 23.534 | 30.353 | 14.466 | 0.00 | 0.00 | H   |
| ATOM | 1747 | HB2  | ALA | 111 | 22.749 | 31.679 | 15.279 | 0.00 | 0.00 | H   |
| ATOM | 1748 | HB3  | ALA | 111 | 22.750 | 29.935 | 15.945 | 0.00 | 0.00 | H   |
| ATOM | 1749 | N    | TYR | 112 | 21.712 | 31.449 | 12.124 | 0.00 | 0.00 | N   |
| ATOM | 1750 | CA   | TYR | 112 | 21.539 | 32.395 | 10.928 | 0.00 | 0.00 | C   |
| ATOM | 1751 | C    | TYR | 112 | 20.106 | 32.331 | 10.290 | 0.00 | 0.00 | C   |
| ATOM | 1752 | O    | TYR | 112 | 19.581 | 33.322 | 9.739  | 0.00 | 0.00 | O   |
| ATOM | 1753 | CB   | TYR | 112 | 22.527 | 32.086 | 9.762  | 0.00 | 0.00 | C   |
| ATOM | 1754 | CG   | TYR | 112 | 24.012 | 32.233 | 10.059 | 0.00 | 0.00 | C   |
| ATOM | 1755 | CD1  | TYR | 112 | 24.587 | 32.879 | 11.245 | 0.00 | 0.00 | C   |
| ATOM | 1756 | CD2  | TYR | 112 | 24.919 | 31.616 | 9.167  | 0.00 | 0.00 | C   |
| ATOM | 1757 | CE1  | TYR | 112 | 25.957 | 33.035 | 11.378 | 0.00 | 0.00 | C   |
| ATOM | 1758 | CE2  | TYR | 112 | 26.308 | 31.653 | 9.348  | 0.00 | 0.00 | C   |
| ATOM | 1759 | CZ   | TYR | 112 | 26.781 | 32.400 | 10.484 | 0.00 | 0.00 | C   |
| ATOM | 1760 | OH   | TYR | 112 | 28.128 | 32.546 | 10.506 | 0.00 | 0.00 | O   |
| ATOM | 1761 | H    | TYR | 112 | 22.298 | 30.628 | 12.077 | 0.00 | 0.00 | H   |
| ATOM | 1762 | HA   | TYR | 112 | 21.793 | 33.411 | 11.230 | 0.00 | 0.00 | H   |
| ATOM | 1763 | HB2  | TYR | 112 | 22.456 | 31.069 | 9.377  | 0.00 | 0.00 | H   |
| ATOM | 1764 | HB3  | TYR | 112 | 22.237 | 32.795 | 8.987  | 0.00 | 0.00 | H   |
| ATOM | 1765 | HD1  | TYR | 112 | 23.906 | 33.321 | 11.958 | 0.00 | 0.00 | H   |
| ATOM | 1766 | HD2  | TYR | 112 | 24.602 | 30.969 | 8.363  | 0.00 | 0.00 | H   |
| ATOM | 1767 | HE1  | TYR | 112 | 26.301 | 33.525 | 12.278 | 0.00 | 0.00 | H   |
| ATOM | 1768 | HE2  | TYR | 112 | 27.029 | 31.202 | 8.682  | 0.00 | 0.00 | H   |
| ATOM | 1769 | HH   | TYR | 112 | 28.600 | 32.126 | 9.784  | 0.00 | 0.00 | H   |
| ATOM | 1770 | N    | GLU | 113 | 19.491 | 31.170 | 10.362 | 0.00 | 0.00 | N   |
| ATOM | 1771 | CA   | GLU | 113 | 18.049 | 30.984 | 10.101 | 0.00 | 0.00 | C   |
| ATOM | 1772 | C    | GLU | 113 | 17.120 | 31.818 | 11.043 | 0.00 | 0.00 | C   |
| ATOM | 1773 | O    | GLU | 113 | 16.105 | 32.349 | 10.613 | 0.00 | 0.00 | O   |
| ATOM | 1774 | CB   | GLU | 113 | 17.638 | 29.504 | 10.121 | 0.00 | 0.00 | C   |
| ATOM | 1775 | CG   | GLU | 113 | 16.189 | 29.208 | 9.757  | 0.00 | 0.00 | C   |
| ATOM | 1776 | CD   | GLU | 113 | 15.969 | 27.684 | 9.961  | 0.00 | 0.00 | C   |
| ATOM | 1777 | OE1  | GLU | 113 | 15.311 | 27.299 | 10.929 | 0.00 | 0.00 | O   |
| ATOM | 1778 | OE2  | GLU | 113 | 16.462 | 26.952 | 9.052  | 0.00 | 0.00 | O1- |
| ATOM | 1779 | H    | GLU | 113 | 19.951 | 30.336 | 10.695 | 0.00 | 0.00 | H   |
| ATOM | 1780 | HA   | GLU | 113 | 17.934 | 31.309 | 9.067  | 0.00 | 0.00 | H   |
| ATOM | 1781 | HB2  | GLU | 113 | 18.346 | 28.856 | 9.604  | 0.00 | 0.00 | H   |
| ATOM | 1782 | HB3  | GLU | 113 | 17.734 | 29.178 | 11.156 | 0.00 | 0.00 | H   |
| ATOM | 1783 | HG2  | GLU | 113 | 15.480 | 29.849 | 10.280 | 0.00 | 0.00 | H   |
| ATOM | 1784 | HG3  | GLU | 113 | 16.127 | 29.447 | 8.695  | 0.00 | 0.00 | H   |
| ATOM | 1785 | N    | TYR | 114 | 17.471 | 31.788 | 12.326 | 0.00 | 0.00 | N   |
| ATOM | 1786 | CA   | TYR | 114 | 16.730 | 32.519 | 13.414 | 0.00 | 0.00 | C   |
| ATOM | 1787 | C    | TYR | 114 | 16.933 | 34.065 | 13.487 | 0.00 | 0.00 | C   |
| ATOM | 1788 | O    | TYR | 114 | 16.012 | 34.821 | 13.658 | 0.00 | 0.00 | O   |
| ATOM | 1789 | CB   | TYR | 114 | 16.916 | 31.826 | 14.750 | 0.00 | 0.00 | C   |
| ATOM | 1790 | CG   | TYR | 114 | 15.807 | 32.162 | 15.749 | 0.00 | 0.00 | C   |
| ATOM | 1791 | CD1  | TYR | 114 | 14.844 | 31.184 | 16.052 | 0.00 | 0.00 | C   |
| ATOM | 1792 | CD2  | TYR | 114 | 15.733 | 33.381 | 16.427 | 0.00 | 0.00 | C   |
| ATOM | 1793 | CE1  | TYR | 114 | 13.704 | 31.500 | 16.845 | 0.00 | 0.00 | C   |
| ATOM | 1794 | CE2  | TYR | 114 | 14.717 | 33.654 | 17.291 | 0.00 | 0.00 | C   |
| ATOM | 1795 | CZ   | TYR | 114 | 13.649 | 32.776 | 17.472 | 0.00 | 0.00 | C   |
| ATOM | 1796 | OH   | TYR | 114 | 12.634 | 32.998 | 18.364 | 0.00 | 0.00 | O   |
| ATOM | 1797 | H    | TYR | 114 | 18.327 | 31.362 | 12.651 | 0.00 | 0.00 | H   |
| ATOM | 1798 | HA   | TYR | 114 | 15.693 | 32.540 | 13.082 | 0.00 | 0.00 | H   |
| ATOM | 1799 | HB2  | TYR | 114 | 16.894 | 30.753 | 14.560 | 0.00 | 0.00 | H   |
| ATOM | 1800 | HB3  | TYR | 114 | 17.890 | 32.194 | 15.069 | 0.00 | 0.00 | H   |
| ATOM | 1801 | HD1  | TYR | 114 | 14.942 | 30.166 | 15.708 | 0.00 | 0.00 | H   |
| ATOM | 1802 | HD2  | TYR | 114 | 16.449 | 34.178 | 16.292 | 0.00 | 0.00 | H   |

|      |      |      |     |     |        |        |        |      |      |     |
|------|------|------|-----|-----|--------|--------|--------|------|------|-----|
| ATOM | 1803 | HE1  | TYR | 114 | 12.970 | 30.748 | 17.094 | 0.00 | 0.00 | H   |
| ATOM | 1804 | HE2  | TYR | 114 | 14.571 | 34.524 | 17.913 | 0.00 | 0.00 | H   |
| ATOM | 1805 | HH   | TYR | 114 | 11.945 | 32.331 | 18.385 | 0.00 | 0.00 | H   |
| ATOM | 1806 | N    | PHE | 115 | 18.189 | 34.498 | 13.246 | 0.00 | 0.00 | N   |
| ATOM | 1807 | CA   | PHE | 115 | 18.459 | 35.930 | 13.116 | 0.00 | 0.00 | C   |
| ATOM | 1808 | C    | PHE | 115 | 17.617 | 36.472 | 11.923 | 0.00 | 0.00 | C   |
| ATOM | 1809 | O    | PHE | 115 | 16.806 | 37.374 | 12.095 | 0.00 | 0.00 | O   |
| ATOM | 1810 | CB   | PHE | 115 | 19.929 | 36.099 | 12.701 | 0.00 | 0.00 | C   |
| ATOM | 1811 | CG   | PHE | 115 | 20.368 | 37.538 | 12.859 | 0.00 | 0.00 | C   |
| ATOM | 1812 | CD1  | PHE | 115 | 21.368 | 37.851 | 13.800 | 0.00 | 0.00 | C   |
| ATOM | 1813 | CD2  | PHE | 115 | 20.079 | 38.467 | 11.880 | 0.00 | 0.00 | C   |
| ATOM | 1814 | CE1  | PHE | 115 | 21.952 | 39.107 | 13.844 | 0.00 | 0.00 | C   |
| ATOM | 1815 | CE2  | PHE | 115 | 20.568 | 39.765 | 11.935 | 0.00 | 0.00 | C   |
| ATOM | 1816 | CZ   | PHE | 115 | 21.477 | 40.107 | 12.973 | 0.00 | 0.00 | C   |
| ATOM | 1817 | H    | PHE | 115 | 18.941 | 33.850 | 13.063 | 0.00 | 0.00 | H   |
| ATOM | 1818 | HA   | PHE | 115 | 18.091 | 36.460 | 13.994 | 0.00 | 0.00 | H   |
| ATOM | 1819 | HB2  | PHE | 115 | 20.566 | 35.509 | 13.360 | 0.00 | 0.00 | H   |
| ATOM | 1820 | HB3  | PHE | 115 | 20.092 | 35.849 | 11.653 | 0.00 | 0.00 | H   |
| ATOM | 1821 | HD1  | PHE | 115 | 21.668 | 36.960 | 14.332 | 0.00 | 0.00 | H   |
| ATOM | 1822 | HD2  | PHE | 115 | 19.492 | 38.070 | 11.065 | 0.00 | 0.00 | H   |
| ATOM | 1823 | HE1  | PHE | 115 | 22.739 | 39.326 | 14.551 | 0.00 | 0.00 | H   |
| ATOM | 1824 | HE2  | PHE | 115 | 20.211 | 40.522 | 11.252 | 0.00 | 0.00 | H   |
| ATOM | 1825 | HZ   | PHE | 115 | 21.771 | 41.143 | 13.052 | 0.00 | 0.00 | H   |
| ATOM | 1826 | N    | THR | 116 | 17.562 | 35.742 | 10.840 | 0.00 | 0.00 | N   |
| ATOM | 1827 | CA   | THR | 116 | 16.820 | 36.142 | 9.665  | 0.00 | 0.00 | C   |
| ATOM | 1828 | C    | THR | 116 | 15.261 | 36.028 | 9.808  | 0.00 | 0.00 | C   |
| ATOM | 1829 | O    | THR | 116 | 14.509 | 36.787 | 9.304  | 0.00 | 0.00 | O   |
| ATOM | 1830 | CB   | THR | 116 | 17.210 | 35.349 | 8.396  | 0.00 | 0.00 | C   |
| ATOM | 1831 | CG2  | THR | 116 | 16.640 | 35.730 | 7.040  | 0.00 | 0.00 | C   |
| ATOM | 1832 | OG1  | THR | 116 | 18.570 | 35.357 | 8.226  | 0.00 | 0.00 | O   |
| ATOM | 1833 | H    | THR | 116 | 18.101 | 34.888 | 10.823 | 0.00 | 0.00 | H   |
| ATOM | 1834 | HA   | THR | 116 | 16.986 | 37.185 | 9.392  | 0.00 | 0.00 | H   |
| ATOM | 1835 | HB   | THR | 116 | 16.937 | 34.312 | 8.590  | 0.00 | 0.00 | H   |
| ATOM | 1836 | HG1  | THR | 116 | 18.695 | 34.473 | 8.578  | 0.00 | 0.00 | H   |
| ATOM | 1837 | HG21 | THR | 116 | 15.558 | 35.610 | 6.980  | 0.00 | 0.00 | H   |
| ATOM | 1838 | HG22 | THR | 116 | 16.775 | 36.800 | 6.879  | 0.00 | 0.00 | H   |
| ATOM | 1839 | HG23 | THR | 116 | 17.053 | 35.084 | 6.265  | 0.00 | 0.00 | H   |
| ATOM | 1840 | N    | LYS | 117 | 14.821 | 35.198 | 10.768 | 0.00 | 0.00 | N   |
| ATOM | 1841 | CA   | LYS | 117 | 13.371 | 35.081 | 11.158 | 0.00 | 0.00 | C   |
| ATOM | 1842 | C    | LYS | 117 | 12.908 | 36.409 | 11.842 | 0.00 | 0.00 | C   |
| ATOM | 1843 | O    | LYS | 117 | 11.818 | 36.926 | 11.564 | 0.00 | 0.00 | O   |
| ATOM | 1844 | CB   | LYS | 117 | 13.221 | 33.833 | 12.078 | 0.00 | 0.00 | C   |
| ATOM | 1845 | CG   | LYS | 117 | 11.737 | 33.394 | 12.311 | 0.00 | 0.00 | C   |
| ATOM | 1846 | CD   | LYS | 117 | 11.724 | 32.227 | 13.316 | 0.00 | 0.00 | C   |
| ATOM | 1847 | CE   | LYS | 117 | 12.579 | 30.990 | 12.887 | 0.00 | 0.00 | C   |
| ATOM | 1848 | NZ   | LYS | 117 | 11.833 | 29.778 | 13.208 | 0.00 | 0.00 | N1+ |
| ATOM | 1849 | H    | LYS | 117 | 15.490 | 34.687 | 11.325 | 0.00 | 0.00 | H   |
| ATOM | 1850 | HA   | LYS | 117 | 12.690 | 35.019 | 10.309 | 0.00 | 0.00 | H   |
| ATOM | 1851 | HB2  | LYS | 117 | 13.815 | 32.997 | 11.707 | 0.00 | 0.00 | H   |
| ATOM | 1852 | HB3  | LYS | 117 | 13.533 | 34.154 | 13.071 | 0.00 | 0.00 | H   |
| ATOM | 1853 | HG2  | LYS | 117 | 11.206 | 34.252 | 12.724 | 0.00 | 0.00 | H   |
| ATOM | 1854 | HG3  | LYS | 117 | 11.249 | 33.064 | 11.395 | 0.00 | 0.00 | H   |
| ATOM | 1855 | HD2  | LYS | 117 | 12.139 | 32.612 | 14.246 | 0.00 | 0.00 | H   |
| ATOM | 1856 | HD3  | LYS | 117 | 10.704 | 31.867 | 13.457 | 0.00 | 0.00 | H   |
| ATOM | 1857 | HE2  | LYS | 117 | 12.645 | 30.967 | 11.799 | 0.00 | 0.00 | H   |
| ATOM | 1858 | HE3  | LYS | 117 | 13.553 | 30.885 | 13.367 | 0.00 | 0.00 | H   |
| ATOM | 1859 | HZ1  | LYS | 117 | 10.934 | 29.765 | 12.747 | 0.00 | 0.00 | H   |
| ATOM | 1860 | HZ2  | LYS | 117 | 12.256 | 28.963 | 12.789 | 0.00 | 0.00 | H   |
| ATOM | 1861 | HZ3  | LYS | 117 | 11.759 | 29.700 | 14.212 | 0.00 | 0.00 | H   |
| ATOM | 1862 | N    | ILE | 118 | 13.724 | 36.936 | 12.783 | 0.00 | 0.00 | N   |
| ATOM | 1863 | CA   | ILE | 118 | 13.344 | 38.020 | 13.766 | 0.00 | 0.00 | C   |
| ATOM | 1864 | C    | ILE | 118 | 13.843 | 39.464 | 13.353 | 0.00 | 0.00 | C   |
| ATOM | 1865 | O    | ILE | 118 | 13.436 | 40.391 | 14.027 | 0.00 | 0.00 | O   |
| ATOM | 1866 | CB   | ILE | 118 | 13.739 | 37.721 | 15.241 | 0.00 | 0.00 | C   |
| ATOM | 1867 | CG1  | ILE | 118 | 15.213 | 37.914 | 15.574 | 0.00 | 0.00 | C   |
| ATOM | 1868 | CG2  | ILE | 118 | 13.240 | 36.374 | 15.625 | 0.00 | 0.00 | C   |
| ATOM | 1869 | CD1  | ILE | 118 | 15.525 | 37.755 | 17.065 | 0.00 | 0.00 | C   |
| ATOM | 1870 | H    | ILE | 118 | 14.644 | 36.533 | 12.889 | 0.00 | 0.00 | H   |
| ATOM | 1871 | HA   | ILE | 118 | 12.267 | 38.179 | 13.798 | 0.00 | 0.00 | H   |
| ATOM | 1872 | HB   | ILE | 118 | 13.132 | 38.443 | 15.789 | 0.00 | 0.00 | H   |
| ATOM | 1873 | HG12 | ILE | 118 | 15.815 | 37.193 | 15.020 | 0.00 | 0.00 | H   |
| ATOM | 1874 | HG13 | ILE | 118 | 15.377 | 38.943 | 15.258 | 0.00 | 0.00 | H   |
| ATOM | 1875 | HG21 | ILE | 118 | 13.975 | 35.583 | 15.483 | 0.00 | 0.00 | H   |
| ATOM | 1876 | HG22 | ILE | 118 | 13.127 | 36.363 | 16.708 | 0.00 | 0.00 | H   |
| ATOM | 1877 | HG23 | ILE | 118 | 12.272 | 36.101 | 15.203 | 0.00 | 0.00 | H   |
| ATOM | 1878 | HD11 | ILE | 118 | 14.663 | 38.062 | 17.657 | 0.00 | 0.00 | H   |
| ATOM | 1879 | HD12 | ILE | 118 | 15.904 | 36.768 | 17.329 | 0.00 | 0.00 | H   |
| ATOM | 1880 | HD13 | ILE | 118 | 16.331 | 38.439 | 17.329 | 0.00 | 0.00 | H   |
| ATOM | 1881 | N    | ALA | 119 | 14.653 | 39.613 | 12.297 | 0.00 | 0.00 | N   |
| ATOM | 1882 | CA   | ALA | 119 | 15.321 | 40.829 | 11.858 | 0.00 | 0.00 | C   |
| ATOM | 1883 | C    | ALA | 119 | 14.846 | 41.407 | 10.437 | 0.00 | 0.00 | C   |
| ATOM | 1884 | O    | ALA | 119 | 14.917 | 42.588 | 10.223 | 0.00 | 0.00 | O   |
| ATOM | 1885 | CB   | ALA | 119 | 16.847 | 40.636 | 11.717 | 0.00 | 0.00 | C   |
| ATOM | 1886 | H    | ALA | 119 | 15.073 | 38.736 | 12.026 | 0.00 | 0.00 | H   |
| ATOM | 1887 | HA   | ALA | 119 | 15.109 | 41.569 | 12.630 | 0.00 | 0.00 | H   |
| ATOM | 1888 | HB1  | ALA | 119 | 17.247 | 39.833 | 11.099 | 0.00 | 0.00 | H   |
| ATOM | 1889 | HB2  | ALA | 119 | 17.243 | 41.601 | 11.402 | 0.00 | 0.00 | H   |
| ATOM | 1890 | HB3  | ALA | 119 | 17.313 | 40.361 | 12.663 | 0.00 | 0.00 | H   |
| ATOM | 1891 | N    | THR | 120 | 14.297 | 40.554 | 9.574  | 0.00 | 0.00 | N   |
| ATOM | 1892 | CA   | THR | 120 | 14.146 | 40.897 | 8.117  | 0.00 | 0.00 | C   |
| ATOM | 1893 | C    | THR | 120 | 12.929 | 41.898 | 7.951  | 0.00 | 0.00 | C   |
| ATOM | 1894 | O    | THR | 120 | 12.917 | 42.598 | 6.954  | 0.00 | 0.00 | O   |
| ATOM | 1895 | CB   | THR | 120 | 13.975 | 39.726 | 7.141  | 0.00 | 0.00 | C   |
| ATOM | 1896 | CG2  | THR | 120 | 14.140 | 40.087 | 5.689  | 0.00 | 0.00 | C   |
| ATOM | 1897 | OG1  | THR | 120 | 14.914 | 38.731 | 7.385  | 0.00 | 0.00 | O   |
| ATOM | 1898 | H    | THR | 120 | 14.333 | 39.554 | 9.710  | 0.00 | 0.00 | H   |
| ATOM | 1899 | HA   | THR | 120 | 15.065 | 41.412 | 7.836  | 0.00 | 0.00 | H   |
| ATOM | 1900 | HB   | THR | 120 | 12.974 | 39.313 | 7.266  | 0.00 | 0.00 | H   |
| ATOM | 1901 | HG1  | THR | 120 | 14.487 | 37.982 | 7.806  | 0.00 | 0.00 | H   |
| ATOM | 1902 | HG21 | THR | 120 | 13.454 | 40.844 | 5.311  | 0.00 | 0.00 | H   |
| ATOM | 1903 | HG22 | THR | 120 | 15.128 | 40.512 | 5.510  | 0.00 | 0.00 | H   |
| ATOM | 1904 | HG23 | THR | 120 | 14.127 | 39.218 | 5.031  | 0.00 | 0.00 | H   |
| ATOM | 1905 | N    | SER | 121 | 12.109 | 42.092 | 9.008  | 0.00 | 0.00 | N   |
| ATOM | 1906 | CA   | SER | 121 | 11.099 | 43.157 | 9.035  | 0.00 | 0.00 | C   |
| ATOM | 1907 | C    | SER | 121 | 11.339 | 44.120 | 10.227 | 0.00 | 0.00 | C   |

|      |      |      |     |     |        |        |        |      |      |     |
|------|------|------|-----|-----|--------|--------|--------|------|------|-----|
| ATOM | 1908 | O    | SER | 121 | 10.574 | 45.004 | 10.540 | 0.00 | 0.00 | O   |
| ATOM | 1909 | CB   | SER | 121 | 9.624  | 42.652 | 9.086  | 0.00 | 0.00 | C   |
| ATOM | 1910 | OG   | SER | 121 | 9.228  | 42.242 | 7.765  | 0.00 | 0.00 | O   |
| ATOM | 1911 | H    | SER | 121 | 12.248 | 41.486 | 9.804  | 0.00 | 0.00 | H   |
| ATOM | 1912 | HA   | SER | 121 | 11.253 | 43.777 | 8.152  | 0.00 | 0.00 | H   |
| ATOM | 1913 | HB2  | SER | 121 | 9.618  | 41.748 | 9.696  | 0.00 | 0.00 | H   |
| ATOM | 1914 | HB3  | SER | 121 | 8.969  | 43.470 | 9.385  | 0.00 | 0.00 | H   |
| ATOM | 1915 | HG   | SER | 121 | 9.315  | 43.036 | 7.233  | 0.00 | 0.00 | H   |
| ATOM | 1916 | N    | LEU | 122 | 12.603 | 44.045 | 10.848 | 0.00 | 0.00 | N   |
| ATOM | 1917 | CA   | LEU | 122 | 12.942 | 44.936 | 11.934 | 0.00 | 0.00 | C   |
| ATOM | 1918 | C    | LEU | 122 | 12.925 | 46.460 | 11.624 | 0.00 | 0.00 | C   |
| ATOM | 1919 | O    | LEU | 122 | 12.677 | 47.308 | 12.444 | 0.00 | 0.00 | O   |
| ATOM | 1920 | CB   | LEU | 122 | 14.239 | 44.560 | 12.612 | 0.00 | 0.00 | C   |
| ATOM | 1921 | CG   | LEU | 122 | 14.703 | 45.395 | 13.836 | 0.00 | 0.00 | C   |
| ATOM | 1922 | CD1  | LEU | 122 | 13.629 | 45.460 | 14.893 | 0.00 | 0.00 | C   |
| ATOM | 1923 | CD2  | LEU | 122 | 16.009 | 44.879 | 14.497 | 0.00 | 0.00 | C   |
| ATOM | 1924 | H    | LEU | 122 | 13.390 | 43.563 | 10.441 | 0.00 | 0.00 | H   |
| ATOM | 1925 | HA   | LEU | 122 | 12.113 | 44.720 | 12.606 | 0.00 | 0.00 | H   |
| ATOM | 1926 | HB2  | LEU | 122 | 14.366 | 43.555 | 13.017 | 0.00 | 0.00 | H   |
| ATOM | 1927 | HB3  | LEU | 122 | 15.006 | 44.769 | 11.867 | 0.00 | 0.00 | H   |
| ATOM | 1928 | HG   | LEU | 122 | 14.883 | 46.409 | 13.482 | 0.00 | 0.00 | H   |
| ATOM | 1929 | HD11 | LEU | 122 | 13.581 | 44.502 | 15.411 | 0.00 | 0.00 | H   |
| ATOM | 1930 | HD12 | LEU | 122 | 12.651 | 45.661 | 14.455 | 0.00 | 0.00 | H   |
| ATOM | 1931 | HD13 | LEU | 122 | 13.751 | 46.269 | 15.613 | 0.00 | 0.00 | H   |
| ATOM | 1932 | HD21 | LEU | 122 | 15.708 | 44.175 | 15.271 | 0.00 | 0.00 | H   |
| ATOM | 1933 | HD22 | LEU | 122 | 16.754 | 44.438 | 13.834 | 0.00 | 0.00 | H   |
| ATOM | 1934 | HD23 | LEU | 122 | 16.497 | 45.673 | 15.062 | 0.00 | 0.00 | H   |
| ATOM | 1935 | N    | PHE | 123 | 13.222 | 46.893 | 10.371 | 0.00 | 0.00 | N   |
| ATOM | 1936 | CA   | PHE | 123 | 13.525 | 48.221 | 9.982  | 0.00 | 0.00 | C   |
| ATOM | 1937 | C    | PHE | 123 | 12.535 | 48.762 | 8.976  | 0.00 | 0.00 | C   |
| ATOM | 1938 | O    | PHE | 123 | 12.590 | 49.951 | 8.660  | 0.00 | 0.00 | O   |
| ATOM | 1939 | CB   | PHE | 123 | 14.962 | 48.288 | 9.479  | 0.00 | 0.00 | C   |
| ATOM | 1940 | CG   | PHE | 123 | 15.944 | 47.920 | 10.531 | 0.00 | 0.00 | C   |
| ATOM | 1941 | CD1  | PHE | 123 | 16.107 | 48.737 | 11.709 | 0.00 | 0.00 | C   |
| ATOM | 1942 | CD2  | PHE | 123 | 16.714 | 46.771 | 10.323 | 0.00 | 0.00 | C   |
| ATOM | 1943 | CE1  | PHE | 123 | 16.874 | 48.227 | 12.790 | 0.00 | 0.00 | C   |
| ATOM | 1944 | CE2  | PHE | 123 | 17.350 | 46.156 | 11.461 | 0.00 | 0.00 | C   |
| ATOM | 1945 | CZ   | PHE | 123 | 17.542 | 46.960 | 12.592 | 0.00 | 0.00 | C   |
| ATOM | 1946 | H    | PHE | 123 | 13.565 | 46.233 | 9.688  | 0.00 | 0.00 | H   |
| ATOM | 1947 | HA   | PHE | 123 | 13.426 | 48.794 | 10.904 | 0.00 | 0.00 | H   |
| ATOM | 1948 | HB2  | PHE | 123 | 15.058 | 47.670 | 8.587  | 0.00 | 0.00 | H   |
| ATOM | 1949 | HB3  | PHE | 123 | 15.190 | 49.270 | 9.066  | 0.00 | 0.00 | H   |
| ATOM | 1950 | HD1  | PHE | 123 | 15.457 | 49.584 | 11.867 | 0.00 | 0.00 | H   |
| ATOM | 1951 | HD2  | PHE | 123 | 16.682 | 46.292 | 9.355  | 0.00 | 0.00 | H   |
| ATOM | 1952 | HE1  | PHE | 123 | 16.972 | 48.755 | 13.727 | 0.00 | 0.00 | H   |
| ATOM | 1953 | HE2  | PHE | 123 | 17.821 | 45.190 | 11.355 | 0.00 | 0.00 | H   |
| ATOM | 1954 | HZ   | PHE | 123 | 18.131 | 46.647 | 13.440 | 0.00 | 0.00 | H   |
| ATOM | 1955 | N    | GLU | 124 | 11.583 | 47.978 | 8.451  | 0.00 | 0.00 | N   |
| ATOM | 1956 | CA   | GLU | 124 | 10.518 | 48.473 | 7.518  | 0.00 | 0.00 | C   |
| ATOM | 1957 | C    | GLU | 124 | 9.629  | 49.615 | 8.160  | 0.00 | 0.00 | C   |
| ATOM | 1958 | O    | GLU | 124 | 9.278  | 50.613 | 7.542  | 0.00 | 0.00 | O   |
| ATOM | 1959 | CB   | GLU | 124 | 9.616  | 47.327 | 7.045  | 0.00 | 0.00 | C   |
| ATOM | 1960 | CG   | GLU | 124 | 10.431 | 46.412 | 6.078  | 0.00 | 0.00 | C   |
| ATOM | 1961 | CD   | GLU | 124 | 9.716  | 45.190 | 5.408  | 0.00 | 0.00 | C   |
| ATOM | 1962 | OE1  | GLU | 124 | 9.165  | 44.279 | 6.091  | 0.00 | 0.00 | O   |
| ATOM | 1963 | OE2  | GLU | 124 | 9.752  | 45.161 | 4.147  | 0.00 | 0.00 | O1- |
| ATOM | 1964 | H    | GLU | 124 | 11.459 | 47.013 | 8.721  | 0.00 | 0.00 | H   |
| ATOM | 1965 | HA   | GLU | 124 | 10.974 | 48.992 | 6.676  | 0.00 | 0.00 | H   |
| ATOM | 1966 | HB2  | GLU | 124 | 9.127  | 46.764 | 7.839  | 0.00 | 0.00 | H   |
| ATOM | 1967 | HB3  | GLU | 124 | 8.704  | 47.712 | 6.591  | 0.00 | 0.00 | H   |
| ATOM | 1968 | HG2  | GLU | 124 | 11.265 | 46.015 | 6.657  | 0.00 | 0.00 | H   |
| ATOM | 1969 | HG3  | GLU | 124 | 10.873 | 47.069 | 5.330  | 0.00 | 0.00 | H   |
| ATOM | 1970 | N    | SER | 125 | 9.318  | 49.450 | 9.457  | 0.00 | 0.00 | N   |
| ATOM | 1971 | CA   | SER | 125 | 8.482  | 50.420 | 10.192 | 0.00 | 0.00 | C   |
| ATOM | 1972 | C    | SER | 125 | 9.367  | 51.495 | 10.876 | 0.00 | 0.00 | C   |
| ATOM | 1973 | O    | SER | 125 | 9.028  | 52.003 | 11.935 | 0.00 | 0.00 | O   |
| ATOM | 1974 | CB   | SER | 125 | 7.611  | 49.621 | 11.131 | 0.00 | 0.00 | C   |
| ATOM | 1975 | OG   | SER | 125 | 8.232  | 48.710 | 11.874 | 0.00 | 0.00 | O   |
| ATOM | 1976 | H    | SER | 125 | 9.420  | 48.543 | 9.886  | 0.00 | 0.00 | H   |
| ATOM | 1977 | HA   | SER | 125 | 7.871  | 50.990 | 9.492  | 0.00 | 0.00 | H   |
| ATOM | 1978 | HB2  | SER | 125 | 7.170  | 50.357 | 11.803 | 0.00 | 0.00 | H   |
| ATOM | 1979 | HB3  | SER | 125 | 6.780  | 49.057 | 10.704 | 0.00 | 0.00 | H   |
| ATOM | 1980 | HG   | SER | 125 | 8.483  | 47.985 | 11.296 | 0.00 | 0.00 | H   |
| ATOM | 1981 | N    | GLY | 126 | 10.422 | 51.933 | 10.170 | 0.00 | 0.00 | N   |
| ATOM | 1982 | CA   | GLY | 126 | 11.339 | 52.910 | 10.667 | 0.00 | 0.00 | C   |
| ATOM | 1983 | C    | GLY | 126 | 12.538 | 52.267 | 11.351 | 0.00 | 0.00 | C   |
| ATOM | 1984 | O    | GLY | 126 | 12.593 | 51.192 | 11.930 | 0.00 | 0.00 | O   |
| ATOM | 1985 | H    | GLY | 126 | 10.461 | 51.657 | 9.200  | 0.00 | 0.00 | H   |
| ATOM | 1986 | HA2  | GLY | 126 | 11.682 | 53.634 | 9.928  | 0.00 | 0.00 | H   |
| ATOM | 1987 | HA3  | GLY | 126 | 10.868 | 53.481 | 11.467 | 0.00 | 0.00 | H   |
| ATOM | 1988 | N    | ILE | 127 | 13.602 | 53.007 | 11.381 | 0.00 | 0.00 | N   |
| ATOM | 1989 | CA   | ILE | 127 | 14.930 | 52.655 | 11.946 | 0.00 | 0.00 | C   |
| ATOM | 1990 | C    | ILE | 127 | 15.410 | 53.775 | 12.883 | 0.00 | 0.00 | C   |
| ATOM | 1991 | O    | ILE | 127 | 15.332 | 54.935 | 12.553 | 0.00 | 0.00 | O   |
| ATOM | 1992 | CB   | ILE | 127 | 15.901 | 52.378 | 10.793 | 0.00 | 0.00 | C   |
| ATOM | 1993 | CG1  | ILE | 127 | 17.372 | 51.887 | 11.197 | 0.00 | 0.00 | C   |
| ATOM | 1994 | CG2  | ILE | 127 | 16.003 | 53.605 | 9.843  | 0.00 | 0.00 | C   |
| ATOM | 1995 | CD1  | ILE | 127 | 18.268 | 51.343 | 10.130 | 0.00 | 0.00 | C   |
| ATOM | 1996 | H    | ILE | 127 | 13.595 | 53.911 | 10.929 | 0.00 | 0.00 | H   |
| ATOM | 1997 | HA   | ILE | 127 | 14.928 | 51.678 | 12.431 | 0.00 | 0.00 | H   |
| ATOM | 1998 | HB   | ILE | 127 | 15.444 | 51.589 | 10.194 | 0.00 | 0.00 | H   |
| ATOM | 1999 | HG12 | ILE | 127 | 17.960 | 52.697 | 11.629 | 0.00 | 0.00 | H   |
| ATOM | 2000 | HG13 | ILE | 127 | 17.299 | 51.143 | 11.991 | 0.00 | 0.00 | H   |
| ATOM | 2001 | HG21 | ILE | 127 | 16.596 | 53.317 | 8.975  | 0.00 | 0.00 | H   |
| ATOM | 2002 | HG22 | ILE | 127 | 15.014 | 54.008 | 9.626  | 0.00 | 0.00 | H   |
| ATOM | 2003 | HG23 | ILE | 127 | 16.422 | 54.492 | 10.319 | 0.00 | 0.00 | H   |
| ATOM | 2004 | HD11 | ILE | 127 | 19.071 | 50.727 | 10.534 | 0.00 | 0.00 | H   |
| ATOM | 2005 | HD12 | ILE | 127 | 17.627 | 50.755 | 9.474  | 0.00 | 0.00 | H   |
| ATOM | 2006 | HD13 | ILE | 127 | 18.822 | 52.064 | 9.529  | 0.00 | 0.00 | H   |
| ATOM | 2007 | N    | ASN | 128 | 15.858 | 53.269 | 14.038 | 0.00 | 0.00 | N   |
| ATOM | 2008 | CA   | ASN | 128 | 16.336 | 54.108 | 15.226 | 0.00 | 0.00 | C   |
| ATOM | 2009 | C    | ASN | 128 | 17.414 | 53.432 | 16.113 | 0.00 | 0.00 | C   |
| ATOM | 2010 | O    | ASN | 128 | 17.609 | 52.210 | 15.920 | 0.00 | 0.00 | O   |
| ATOM | 2011 | CB   | ASN | 128 | 15.087 | 54.458 | 16.002 | 0.00 | 0.00 | C   |
| ATOM | 2012 | CG   | ASN | 128 | 14.548 | 53.258 | 16.825 | 0.00 | 0.00 | C   |



|      |      |      |     |     |        |        |        |      |      |     |
|------|------|------|-----|-----|--------|--------|--------|------|------|-----|
| ATOM | 2013 | ND2  | ASN | 128 | 13.283 | 52.946 | 16.500 | 0.00 | 0.00 | N   |
| ATOM | 2014 | OD1  | ASN | 128 | 15.205 | 52.544 | 17.580 | 0.00 | 0.00 | O   |
| ATOM | 2015 | H    | ASN | 128 | 15.583 | 52.315 | 14.230 | 0.00 | 0.00 | H   |
| ATOM | 2016 | HA   | ASN | 128 | 16.678 | 55.092 | 14.902 | 0.00 | 0.00 | H   |
| ATOM | 2017 | HB2  | ASN | 128 | 15.411 | 55.254 | 16.672 | 0.00 | 0.00 | H   |
| ATOM | 2018 | HB3  | ASN | 128 | 14.266 | 54.798 | 15.372 | 0.00 | 0.00 | H   |
| ATOM | 2019 | HD21 | ASN | 128 | 12.796 | 52.296 | 17.100 | 0.00 | 0.00 | H   |
| ATOM | 2020 | HD22 | ASN | 128 | 12.709 | 53.557 | 15.937 | 0.00 | 0.00 | H   |
| ATOM | 2021 | N    | TRP | 129 | 17.992 | 54.162 | 17.066 | 0.00 | 0.00 | N   |
| ATOM | 2022 | CA   | TRP | 129 | 19.158 | 53.612 | 17.851 | 0.00 | 0.00 | C   |
| ATOM | 2023 | C    | TRP | 129 | 18.845 | 52.446 | 18.854 | 0.00 | 0.00 | C   |
| ATOM | 2024 | O    | TRP | 129 | 19.637 | 51.499 | 19.030 | 0.00 | 0.00 | O   |
| ATOM | 2025 | CB   | TRP | 129 | 20.032 | 54.599 | 18.524 | 0.00 | 0.00 | C   |
| ATOM | 2026 | CG   | TRP | 129 | 21.227 | 54.973 | 17.652 | 0.00 | 0.00 | C   |
| ATOM | 2027 | CD1  | TRP | 129 | 21.315 | 56.214 | 17.060 | 0.00 | 0.00 | C   |
| ATOM | 2028 | CD2  | TRP | 129 | 22.430 | 54.297 | 17.179 | 0.00 | 0.00 | C   |
| ATOM | 2029 | CE2  | TRP | 129 | 23.204 | 55.205 | 16.404 | 0.00 | 0.00 | C   |
| ATOM | 2030 | CE3  | TRP | 129 | 22.890 | 53.051 | 17.604 | 0.00 | 0.00 | C   |
| ATOM | 2031 | NE1  | TRP | 129 | 22.492 | 56.327 | 16.343 | 0.00 | 0.00 | N   |
| ATOM | 2032 | CZ2  | TRP | 129 | 24.429 | 54.822 | 16.004 | 0.00 | 0.00 | C   |
| ATOM | 2033 | CZ3  | TRP | 129 | 24.116 | 52.658 | 17.012 | 0.00 | 0.00 | C   |
| ATOM | 2034 | CH2  | TRP | 129 | 24.891 | 53.519 | 16.175 | 0.00 | 0.00 | C   |
| ATOM | 2035 | H    | TRP | 129 | 17.721 | 55.134 | 17.126 | 0.00 | 0.00 | H   |
| ATOM | 2036 | HA   | TRP | 129 | 19.782 | 53.073 | 17.136 | 0.00 | 0.00 | H   |
| ATOM | 2037 | HB2  | TRP | 129 | 19.461 | 55.460 | 18.872 | 0.00 | 0.00 | H   |
| ATOM | 2038 | HB3  | TRP | 129 | 20.479 | 54.101 | 19.385 | 0.00 | 0.00 | H   |
| ATOM | 2039 | HD1  | TRP | 129 | 20.556 | 56.982 | 17.078 | 0.00 | 0.00 | H   |
| ATOM | 2040 | HE1  | TRP | 129 | 22.614 | 57.112 | 15.720 | 0.00 | 0.00 | H   |
| ATOM | 2041 | HE3  | TRP | 129 | 22.322 | 52.574 | 18.388 | 0.00 | 0.00 | H   |
| ATOM | 2042 | HZ2  | TRP | 129 | 25.059 | 55.476 | 15.420 | 0.00 | 0.00 | H   |
| ATOM | 2043 | HZ3  | TRP | 129 | 24.524 | 51.664 | 17.126 | 0.00 | 0.00 | H   |
| ATOM | 2044 | HH2  | TRP | 129 | 25.760 | 53.106 | 15.684 | 0.00 | 0.00 | H   |
| ATOM | 2045 | N    | GLY | 130 | 17.621 | 52.421 | 19.412 | 0.00 | 0.00 | N   |
| ATOM | 2046 | CA   | GLY | 130 | 17.080 | 51.287 | 20.137 | 0.00 | 0.00 | C   |
| ATOM | 2047 | C    | GLY | 130 | 16.958 | 50.045 | 19.265 | 0.00 | 0.00 | C   |
| ATOM | 2048 | O    | GLY | 130 | 17.497 | 48.960 | 19.653 | 0.00 | 0.00 | O   |
| ATOM | 2049 | H    | GLY | 130 | 16.998 | 53.163 | 19.126 | 0.00 | 0.00 | H   |
| ATOM | 2050 | HA2  | GLY | 130 | 17.710 | 51.014 | 20.983 | 0.00 | 0.00 | H   |
| ATOM | 2051 | HA3  | GLY | 130 | 16.089 | 51.461 | 20.556 | 0.00 | 0.00 | H   |
| ATOM | 2052 | N    | ARG | 131 | 16.396 | 50.068 | 18.107 | 0.00 | 0.00 | N   |
| ATOM | 2053 | CA   | ARG | 131 | 16.256 | 48.920 | 17.216 | 0.00 | 0.00 | C   |
| ATOM | 2054 | C    | ARG | 131 | 17.524 | 48.359 | 16.835 | 0.00 | 0.00 | C   |
| ATOM | 2055 | O    | ARG | 131 | 17.640 | 47.143 | 16.838 | 0.00 | 0.00 | O   |
| ATOM | 2056 | CB   | ARG | 131 | 15.432 | 49.477 | 16.091 | 0.00 | 0.00 | C   |
| ATOM | 2057 | CG   | ARG | 131 | 13.903 | 49.435 | 16.374 | 0.00 | 0.00 | C   |
| ATOM | 2058 | CD   | ARG | 131 | 13.007 | 49.532 | 15.114 | 0.00 | 0.00 | C   |
| ATOM | 2059 | NE   | ARG | 131 | 11.661 | 49.996 | 15.414 | 0.00 | 0.00 | N   |
| ATOM | 2060 | CZ   | ARG | 131 | 10.591 | 49.900 | 14.685 | 0.00 | 0.00 | C   |
| ATOM | 2061 | NH1  | ARG | 131 | 10.549 | 49.662 | 13.420 | 0.00 | 0.00 | N1+ |
| ATOM | 2062 | NH2  | ARG | 131 | 9.494  | 49.997 | 15.273 | 0.00 | 0.00 | N   |
| ATOM | 2063 | H    | ARG | 131 | 15.973 | 50.938 | 17.815 | 0.00 | 0.00 | H   |
| ATOM | 2064 | HA   | ARG | 131 | 15.714 | 48.093 | 17.677 | 0.00 | 0.00 | H   |
| ATOM | 2065 | HB2  | ARG | 131 | 15.819 | 50.424 | 15.715 | 0.00 | 0.00 | H   |
| ATOM | 2066 | HB3  | ARG | 131 | 15.464 | 48.756 | 15.275 | 0.00 | 0.00 | H   |
| ATOM | 2067 | HG2  | ARG | 131 | 13.675 | 48.460 | 16.805 | 0.00 | 0.00 | H   |
| ATOM | 2068 | HG3  | ARG | 131 | 13.618 | 50.264 | 17.023 | 0.00 | 0.00 | H   |
| ATOM | 2069 | HD2  | ARG | 131 | 13.517 | 50.350 | 14.604 | 0.00 | 0.00 | H   |
| ATOM | 2070 | HD3  | ARG | 131 | 12.938 | 48.676 | 14.443 | 0.00 | 0.00 | H   |
| ATOM | 2071 | HE   | ARG | 131 | 11.484 | 50.222 | 16.382 | 0.00 | 0.00 | H   |
| ATOM | 2072 | HH11 | ARG | 131 | 11.444 | 49.518 | 12.973 | 0.00 | 0.00 | H   |
| ATOM | 2073 | HH12 | ARG | 131 | 9.722  | 49.364 | 12.922 | 0.00 | 0.00 | H   |
| ATOM | 2074 | HH21 | ARG | 131 | 9.505  | 50.628 | 16.063 | 0.00 | 0.00 | H   |
| ATOM | 2075 | HH22 | ARG | 131 | 8.613  | 49.930 | 14.782 | 0.00 | 0.00 | H   |
| ATOM | 2076 | N    | VAL | 132 | 18.536 | 49.144 | 16.479 | 0.00 | 0.00 | N   |
| ATOM | 2077 | CA   | VAL | 132 | 19.851 | 48.706 | 16.178 | 0.00 | 0.00 | C   |
| ATOM | 2078 | C    | VAL | 132 | 20.596 | 48.273 | 17.449 | 0.00 | 0.00 | C   |
| ATOM | 2079 | O    | VAL | 132 | 21.218 | 47.142 | 17.328 | 0.00 | 0.00 | O   |
| ATOM | 2080 | CB   | VAL | 132 | 20.759 | 49.732 | 15.455 | 0.00 | 0.00 | C   |
| ATOM | 2081 | CG1  | VAL | 132 | 22.218 | 49.291 | 15.140 | 0.00 | 0.00 | C   |
| ATOM | 2082 | CG2  | VAL | 132 | 20.108 | 50.159 | 14.146 | 0.00 | 0.00 | C   |
| ATOM | 2083 | H    | VAL | 132 | 18.347 | 50.135 | 16.428 | 0.00 | 0.00 | H   |
| ATOM | 2084 | HA   | VAL | 132 | 19.744 | 47.818 | 15.556 | 0.00 | 0.00 | H   |
| ATOM | 2085 | HB   | VAL | 132 | 20.692 | 50.566 | 16.155 | 0.00 | 0.00 | H   |
| ATOM | 2086 | HG11 | VAL | 132 | 22.162 | 48.528 | 14.365 | 0.00 | 0.00 | H   |
| ATOM | 2087 | HG12 | VAL | 132 | 22.758 | 50.066 | 14.597 | 0.00 | 0.00 | H   |
| ATOM | 2088 | HG13 | VAL | 132 | 22.794 | 49.025 | 16.027 | 0.00 | 0.00 | H   |
| ATOM | 2089 | HG21 | VAL | 132 | 19.358 | 50.932 | 14.321 | 0.00 | 0.00 | H   |
| ATOM | 2090 | HG22 | VAL | 132 | 20.855 | 50.634 | 13.510 | 0.00 | 0.00 | H   |
| ATOM | 2091 | HG23 | VAL | 132 | 19.737 | 49.376 | 13.486 | 0.00 | 0.00 | H   |
| ATOM | 2092 | N    | VAL | 133 | 20.548 | 48.968 | 18.680 | 0.00 | 0.00 | N   |
| ATOM | 2093 | CA   | VAL | 133 | 21.225 | 48.493 | 19.875 | 0.00 | 0.00 | C   |
| ATOM | 2094 | C    | VAL | 133 | 20.607 | 47.136 | 20.317 | 0.00 | 0.00 | C   |
| ATOM | 2095 | O    | VAL | 133 | 21.299 | 46.233 | 20.707 | 0.00 | 0.00 | O   |
| ATOM | 2096 | CB   | VAL | 133 | 21.290 | 49.566 | 21.021 | 0.00 | 0.00 | C   |
| ATOM | 2097 | CG1  | VAL | 133 | 21.612 | 48.999 | 22.397 | 0.00 | 0.00 | C   |
| ATOM | 2098 | CG2  | VAL | 133 | 22.391 | 50.571 | 20.695 | 0.00 | 0.00 | C   |
| ATOM | 2099 | H    | VAL | 133 | 20.238 | 49.929 | 18.677 | 0.00 | 0.00 | H   |
| ATOM | 2100 | HA   | VAL | 133 | 22.281 | 48.265 | 19.728 | 0.00 | 0.00 | H   |
| ATOM | 2101 | HB   | VAL | 133 | 20.319 | 50.060 | 21.056 | 0.00 | 0.00 | H   |
| ATOM | 2102 | HG11 | VAL | 133 | 20.885 | 48.217 | 22.614 | 0.00 | 0.00 | H   |
| ATOM | 2103 | HG12 | VAL | 133 | 22.644 | 48.653 | 22.350 | 0.00 | 0.00 | H   |
| ATOM | 2104 | HG13 | VAL | 133 | 21.531 | 49.808 | 23.122 | 0.00 | 0.00 | H   |
| ATOM | 2105 | HG21 | VAL | 133 | 23.321 | 50.056 | 20.456 | 0.00 | 0.00 | H   |
| ATOM | 2106 | HG22 | VAL | 133 | 22.012 | 51.215 | 19.901 | 0.00 | 0.00 | H   |
| ATOM | 2107 | HG23 | VAL | 133 | 22.596 | 51.112 | 21.619 | 0.00 | 0.00 | H   |
| ATOM | 2108 | N    | ALA | 134 | 19.309 | 46.874 | 20.090 | 0.00 | 0.00 | N   |
| ATOM | 2109 | CA   | ALA | 134 | 18.627 | 45.613 | 20.523 | 0.00 | 0.00 | C   |
| ATOM | 2110 | C    | ALA | 134 | 18.951 | 44.372 | 19.671 | 0.00 | 0.00 | C   |
| ATOM | 2111 | O    | ALA | 134 | 18.913 | 43.265 | 20.184 | 0.00 | 0.00 | O   |
| ATOM | 2112 | CB   | ALA | 134 | 17.115 | 45.869 | 20.587 | 0.00 | 0.00 | C   |
| ATOM | 2113 | H    | ALA | 134 | 18.722 | 47.616 | 19.737 | 0.00 | 0.00 | H   |
| ATOM | 2114 | HA   | ALA | 134 | 18.975 | 45.473 | 21.546 | 0.00 | 0.00 | H   |
| ATOM | 2115 | HB1  | ALA | 134 | 16.919 | 46.642 | 21.331 | 0.00 | 0.00 | H   |
| ATOM | 2116 | HB2  | ALA | 134 | 16.699 | 46.034 | 19.593 | 0.00 | 0.00 | H   |
| ATOM | 2117 | HB3  | ALA | 134 | 16.549 | 45.022 | 20.973 | 0.00 | 0.00 | H   |

|      |      |      |     |     |        |        |        |      |      |     |
|------|------|------|-----|-----|--------|--------|--------|------|------|-----|
| ATOM | 2118 | N    | LEU | 135 | 19.304 | 44.577 | 18.398 | 0.00 | 0.00 | N   |
| ATOM | 2119 | CA   | LEU | 135 | 19.799 | 43.548 | 17.494 | 0.00 | 0.00 | C   |
| ATOM | 2120 | C    | LEU | 135 | 21.263 | 43.123 | 17.756 | 0.00 | 0.00 | C   |
| ATOM | 2121 | O    | LEU | 135 | 21.576 | 41.933 | 17.649 | 0.00 | 0.00 | O   |
| ATOM | 2122 | CB   | LEU | 135 | 19.563 | 44.060 | 16.108 | 0.00 | 0.00 | C   |
| ATOM | 2123 | CG   | LEU | 135 | 19.969 | 43.042 | 15.011 | 0.00 | 0.00 | C   |
| ATOM | 2124 | CD1  | LEU | 135 | 18.896 | 41.961 | 14.740 | 0.00 | 0.00 | C   |
| ATOM | 2125 | CD2  | LEU | 135 | 20.084 | 43.678 | 13.615 | 0.00 | 0.00 | C   |
| ATOM | 2126 | H    | LEU | 135 | 19.306 | 45.531 | 18.068 | 0.00 | 0.00 | H   |
| ATOM | 2127 | HA   | LEU | 135 | 19.261 | 42.626 | 17.712 | 0.00 | 0.00 | H   |
| ATOM | 2128 | HB2  | LEU | 135 | 18.509 | 44.310 | 15.985 | 0.00 | 0.00 | H   |
| ATOM | 2129 | HB3  | LEU | 135 | 20.098 | 44.984 | 15.886 | 0.00 | 0.00 | H   |
| ATOM | 2130 | HG   | LEU | 135 | 20.930 | 42.554 | 15.171 | 0.00 | 0.00 | H   |
| ATOM | 2131 | HD11 | LEU | 135 | 17.931 | 42.461 | 14.668 | 0.00 | 0.00 | H   |
| ATOM | 2132 | HD12 | LEU | 135 | 19.142 | 41.371 | 13.857 | 0.00 | 0.00 | H   |
| ATOM | 2133 | HD13 | LEU | 135 | 18.769 | 41.356 | 15.638 | 0.00 | 0.00 | H   |
| ATOM | 2134 | HD21 | LEU | 135 | 20.997 | 44.274 | 13.585 | 0.00 | 0.00 | H   |
| ATOM | 2135 | HD22 | LEU | 135 | 20.145 | 42.908 | 12.846 | 0.00 | 0.00 | H   |
| ATOM | 2136 | HD23 | LEU | 135 | 19.260 | 44.376 | 13.468 | 0.00 | 0.00 | H   |
| ATOM | 2137 | N    | LEU | 136 | 22.070 | 44.091 | 18.213 | 0.00 | 0.00 | N   |
| ATOM | 2138 | CA   | LEU | 136 | 23.339 | 43.810 | 18.822 | 0.00 | 0.00 | C   |
| ATOM | 2139 | C    | LEU | 136 | 23.157 | 43.264 | 20.227 | 0.00 | 0.00 | C   |
| ATOM | 2140 | O    | LEU | 136 | 24.009 | 42.496 | 20.623 | 0.00 | 0.00 | O   |
| ATOM | 2141 | CB   | LEU | 136 | 24.139 | 45.089 | 18.785 | 0.00 | 0.00 | C   |
| ATOM | 2142 | CG   | LEU | 136 | 24.315 | 45.571 | 17.352 | 0.00 | 0.00 | C   |
| ATOM | 2143 | CD1  | LEU | 136 | 24.731 | 46.996 | 17.574 | 0.00 | 0.00 | C   |
| ATOM | 2144 | CD2  | LEU | 136 | 25.317 | 44.780 | 16.528 | 0.00 | 0.00 | C   |
| ATOM | 2145 | H    | LEU | 136 | 21.703 | 45.028 | 18.297 | 0.00 | 0.00 | H   |
| ATOM | 2146 | HA   | LEU | 136 | 23.888 | 43.074 | 18.234 | 0.00 | 0.00 | H   |
| ATOM | 2147 | HB2  | LEU | 136 | 23.638 | 45.806 | 19.437 | 0.00 | 0.00 | H   |
| ATOM | 2148 | HB3  | LEU | 136 | 25.086 | 44.903 | 19.291 | 0.00 | 0.00 | H   |
| ATOM | 2149 | HG   | LEU | 136 | 23.415 | 45.652 | 16.741 | 0.00 | 0.00 | H   |
| ATOM | 2150 | HD11 | LEU | 136 | 24.562 | 47.682 | 16.743 | 0.00 | 0.00 | H   |
| ATOM | 2151 | HD12 | LEU | 136 | 25.814 | 47.002 | 17.688 | 0.00 | 0.00 | H   |
| ATOM | 2152 | HD13 | LEU | 136 | 24.323 | 47.553 | 18.419 | 0.00 | 0.00 | H   |
| ATOM | 2153 | HD21 | LEU | 136 | 26.255 | 44.538 | 17.027 | 0.00 | 0.00 | H   |
| ATOM | 2154 | HD22 | LEU | 136 | 24.866 | 43.833 | 16.234 | 0.00 | 0.00 | H   |
| ATOM | 2155 | HD23 | LEU | 136 | 25.402 | 45.480 | 15.697 | 0.00 | 0.00 | H   |
| ATOM | 2156 | N    | GLY | 137 | 22.070 | 43.580 | 20.970 | 0.00 | 0.00 | N   |
| ATOM | 2157 | CA   | GLY | 137 | 21.633 | 42.769 | 22.169 | 0.00 | 0.00 | C   |
| ATOM | 2158 | C    | GLY | 137 | 21.398 | 41.244 | 21.951 | 0.00 | 0.00 | C   |
| ATOM | 2159 | O    | GLY | 137 | 21.947 | 40.425 | 22.708 | 0.00 | 0.00 | O   |
| ATOM | 2160 | H    | GLY | 137 | 21.564 | 44.397 | 20.657 | 0.00 | 0.00 | H   |
| ATOM | 2161 | HA2  | GLY | 137 | 22.426 | 42.822 | 22.915 | 0.00 | 0.00 | H   |
| ATOM | 2162 | HA3  | GLY | 137 | 20.797 | 43.217 | 22.705 | 0.00 | 0.00 | H   |
| ATOM | 2163 | N    | PHE | 138 | 20.646 | 40.910 | 20.891 | 0.00 | 0.00 | N   |
| ATOM | 2164 | CA   | PHE | 138 | 20.420 | 39.528 | 20.526 | 0.00 | 0.00 | C   |
| ATOM | 2165 | C    | PHE | 138 | 21.697 | 38.971 | 19.958 | 0.00 | 0.00 | C   |
| ATOM | 2166 | O    | PHE | 138 | 22.082 | 37.851 | 20.384 | 0.00 | 0.00 | O   |
| ATOM | 2167 | CB   | PHE | 138 | 19.214 | 39.366 | 19.584 | 0.00 | 0.00 | C   |
| ATOM | 2168 | CG   | PHE | 138 | 18.904 | 37.944 | 19.096 | 0.00 | 0.00 | C   |
| ATOM | 2169 | CD1  | PHE | 138 | 18.832 | 36.897 | 20.001 | 0.00 | 0.00 | C   |
| ATOM | 2170 | CD2  | PHE | 138 | 18.862 | 37.594 | 17.751 | 0.00 | 0.00 | C   |
| ATOM | 2171 | CE1  | PHE | 138 | 18.788 | 35.504 | 19.674 | 0.00 | 0.00 | C   |
| ATOM | 2172 | CE2  | PHE | 138 | 18.685 | 36.283 | 17.327 | 0.00 | 0.00 | C   |
| ATOM | 2173 | CZ   | PHE | 138 | 18.592 | 35.277 | 18.291 | 0.00 | 0.00 | C   |
| ATOM | 2174 | H    | PHE | 138 | 19.969 | 41.577 | 20.550 | 0.00 | 0.00 | H   |
| ATOM | 2175 | HA   | PHE | 138 | 20.169 | 38.936 | 21.406 | 0.00 | 0.00 | H   |
| ATOM | 2176 | HB2  | PHE | 138 | 18.384 | 39.828 | 20.120 | 0.00 | 0.00 | H   |
| ATOM | 2177 | HB3  | PHE | 138 | 19.450 | 40.032 | 18.755 | 0.00 | 0.00 | H   |
| ATOM | 2178 | HD1  | PHE | 138 | 18.856 | 37.145 | 21.053 | 0.00 | 0.00 | H   |
| ATOM | 2179 | HD2  | PHE | 138 | 18.913 | 38.365 | 16.998 | 0.00 | 0.00 | H   |
| ATOM | 2180 | HE1  | PHE | 138 | 18.636 | 34.802 | 20.480 | 0.00 | 0.00 | H   |
| ATOM | 2181 | HE2  | PHE | 138 | 18.613 | 36.068 | 16.271 | 0.00 | 0.00 | H   |
| ATOM | 2182 | HZ   | PHE | 138 | 18.430 | 34.244 | 18.022 | 0.00 | 0.00 | H   |
| ATOM | 2183 | N    | GLY | 139 | 22.369 | 39.765 | 19.151 | 0.00 | 0.00 | N   |
| ATOM | 2184 | CA   | GLY | 139 | 23.463 | 39.376 | 18.293 | 0.00 | 0.00 | C   |
| ATOM | 2185 | C    | GLY | 139 | 24.696 | 38.949 | 19.129 | 0.00 | 0.00 | C   |
| ATOM | 2186 | O    | GLY | 139 | 25.538 | 38.168 | 18.725 | 0.00 | 0.00 | O   |
| ATOM | 2187 | H    | GLY | 139 | 22.026 | 40.679 | 18.894 | 0.00 | 0.00 | H   |
| ATOM | 2188 | HA2  | GLY | 139 | 23.140 | 38.482 | 17.758 | 0.00 | 0.00 | H   |
| ATOM | 2189 | HA3  | GLY | 139 | 23.758 | 40.231 | 17.685 | 0.00 | 0.00 | H   |
| ATOM | 2190 | N    | TYR | 140 | 24.879 | 39.647 | 20.250 | 0.00 | 0.00 | N   |
| ATOM | 2191 | CA   | TYR | 140 | 25.864 | 39.182 | 21.306 | 0.00 | 0.00 | C   |
| ATOM | 2192 | C    | TYR | 140 | 25.561 | 37.782 | 21.892 | 0.00 | 0.00 | C   |
| ATOM | 2193 | O    | TYR | 140 | 26.425 | 36.869 | 21.796 | 0.00 | 0.00 | O   |
| ATOM | 2194 | CB   | TYR | 140 | 25.826 | 40.201 | 22.423 | 0.00 | 0.00 | C   |
| ATOM | 2195 | CG   | TYR | 140 | 26.826 | 39.869 | 23.553 | 0.00 | 0.00 | C   |
| ATOM | 2196 | CD1  | TYR | 140 | 27.932 | 39.061 | 23.321 | 0.00 | 0.00 | C   |
| ATOM | 2197 | CD2  | TYR | 140 | 26.408 | 40.135 | 24.860 | 0.00 | 0.00 | C   |
| ATOM | 2198 | CE1  | TYR | 140 | 28.705 | 38.806 | 24.466 | 0.00 | 0.00 | C   |
| ATOM | 2199 | CE2  | TYR | 140 | 27.085 | 39.681 | 25.996 | 0.00 | 0.00 | C   |
| ATOM | 2200 | CZ   | TYR | 140 | 28.334 | 39.046 | 25.766 | 0.00 | 0.00 | C   |
| ATOM | 2201 | OH   | TYR | 140 | 29.128 | 38.729 | 26.808 | 0.00 | 0.00 | O   |
| ATOM | 2202 | H    | TYR | 140 | 24.303 | 40.465 | 20.384 | 0.00 | 0.00 | H   |
| ATOM | 2203 | HA   | TYR | 140 | 26.807 | 39.177 | 20.759 | 0.00 | 0.00 | H   |
| ATOM | 2204 | HB2  | TYR | 140 | 26.003 | 41.200 | 22.026 | 0.00 | 0.00 | H   |
| ATOM | 2205 | HB3  | TYR | 140 | 24.855 | 40.249 | 22.913 | 0.00 | 0.00 | H   |
| ATOM | 2206 | HD1  | TYR | 140 | 28.291 | 38.840 | 22.326 | 0.00 | 0.00 | H   |
| ATOM | 2207 | HD2  | TYR | 140 | 25.447 | 40.604 | 25.010 | 0.00 | 0.00 | H   |
| ATOM | 2208 | HE1  | TYR | 140 | 29.653 | 38.313 | 24.305 | 0.00 | 0.00 | H   |
| ATOM | 2209 | HE2  | TYR | 140 | 26.754 | 39.964 | 26.985 | 0.00 | 0.00 | H   |
| ATOM | 2210 | HH   | TYR | 140 | 28.713 | 38.967 | 27.640 | 0.00 | 0.00 | H   |
| ATOM | 2211 | N    | ARG | 141 | 24.357 | 37.595 | 22.384 | 0.00 | 0.00 | N   |
| ATOM | 2212 | CA   | ARG | 141 | 23.957 | 36.301 | 23.016 | 0.00 | 0.00 | C   |
| ATOM | 2213 | C    | ARG | 141 | 23.909 | 35.114 | 22.026 | 0.00 | 0.00 | C   |
| ATOM | 2214 | O    | ARG | 141 | 24.495 | 34.041 | 22.333 | 0.00 | 0.00 | O   |
| ATOM | 2215 | CB   | ARG | 141 | 22.622 | 36.430 | 23.819 | 0.00 | 0.00 | C   |
| ATOM | 2216 | CG   | ARG | 141 | 22.792 | 37.292 | 25.040 | 0.00 | 0.00 | C   |
| ATOM | 2217 | CD   | ARG | 141 | 23.727 | 36.844 | 26.133 | 0.00 | 0.00 | C   |
| ATOM | 2218 | NE   | ARG | 141 | 23.576 | 37.549 | 27.376 | 0.00 | 0.00 | N   |
| ATOM | 2219 | CZ   | ARG | 141 | 24.448 | 37.971 | 28.253 | 0.00 | 0.00 | C   |
| ATOM | 2220 | NH1  | ARG | 141 | 25.688 | 37.682 | 28.139 | 0.00 | 0.00 | N1+ |
| ATOM | 2221 | NH2  | ARG | 141 | 24.150 | 38.832 | 29.150 | 0.00 | 0.00 | N   |
| ATOM | 2222 | H    | ARG | 141 | 23.702 | 38.362 | 22.322 | 0.00 | 0.00 | H   |

|      |      |      |     |     |        |        |        |      |      |     |
|------|------|------|-----|-----|--------|--------|--------|------|------|-----|
| ATOM | 2223 | HA   | ARG | 141 | 24.809 | 36.001 | 23.626 | 0.00 | 0.00 | H   |
| ATOM | 2224 | HB2  | ARG | 141 | 21.928 | 36.897 | 23.120 | 0.00 | 0.00 | H   |
| ATOM | 2225 | HB3  | ARG | 141 | 22.206 | 35.468 | 24.120 | 0.00 | 0.00 | H   |
| ATOM | 2226 | HG2  | ARG | 141 | 23.164 | 38.286 | 24.791 | 0.00 | 0.00 | H   |
| ATOM | 2227 | HG3  | ARG | 141 | 21.784 | 37.386 | 25.445 | 0.00 | 0.00 | H   |
| ATOM | 2228 | HD2  | ARG | 141 | 23.462 | 35.811 | 26.363 | 0.00 | 0.00 | H   |
| ATOM | 2229 | HD3  | ARG | 141 | 24.745 | 36.841 | 25.742 | 0.00 | 0.00 | H   |
| ATOM | 2230 | HE   | ARG | 141 | 22.635 | 37.714 | 27.704 | 0.00 | 0.00 | H   |
| ATOM | 2231 | HH11 | ARG | 141 | 26.117 | 37.069 | 27.461 | 0.00 | 0.00 | H   |
| ATOM | 2232 | HH12 | ARG | 141 | 26.322 | 38.162 | 28.761 | 0.00 | 0.00 | H   |
| ATOM | 2233 | HH21 | ARG | 141 | 23.209 | 39.197 | 29.148 | 0.00 | 0.00 | H   |
| ATOM | 2234 | HH22 | ARG | 141 | 24.853 | 39.076 | 29.833 | 0.00 | 0.00 | H   |
| ATOM | 2235 | N    | LEU | 142 | 23.358 | 35.276 | 20.819 | 0.00 | 0.00 | N   |
| ATOM | 2236 | CA   | LEU | 142 | 23.460 | 34.238 | 19.790 | 0.00 | 0.00 | C   |
| ATOM | 2237 | C    | LEU | 142 | 24.881 | 33.849 | 19.320 | 0.00 | 0.00 | C   |
| ATOM | 2238 | O    | LEU | 142 | 25.167 | 32.655 | 19.183 | 0.00 | 0.00 | O   |
| ATOM | 2239 | CB   | LEU | 142 | 22.596 | 34.711 | 18.586 | 0.00 | 0.00 | C   |
| ATOM | 2240 | CG   | LEU | 142 | 22.362 | 33.715 | 17.446 | 0.00 | 0.00 | C   |
| ATOM | 2241 | CD1  | LEU | 142 | 21.546 | 32.511 | 17.978 | 0.00 | 0.00 | C   |
| ATOM | 2242 | CD2  | LEU | 142 | 21.557 | 34.397 | 16.348 | 0.00 | 0.00 | C   |
| ATOM | 2243 | H    | LEU | 142 | 23.028 | 36.194 | 20.557 | 0.00 | 0.00 | H   |
| ATOM | 2244 | HA   | LEU | 142 | 22.935 | 33.331 | 20.090 | 0.00 | 0.00 | H   |
| ATOM | 2245 | HB2  | LEU | 142 | 21.605 | 35.020 | 18.918 | 0.00 | 0.00 | H   |
| ATOM | 2246 | HB3  | LEU | 142 | 23.122 | 35.591 | 18.218 | 0.00 | 0.00 | H   |
| ATOM | 2247 | HG   | LEU | 142 | 23.321 | 33.317 | 17.111 | 0.00 | 0.00 | H   |
| ATOM | 2248 | HD11 | LEU | 142 | 21.332 | 31.719 | 17.261 | 0.00 | 0.00 | H   |
| ATOM | 2249 | HD12 | LEU | 142 | 22.100 | 32.028 | 18.785 | 0.00 | 0.00 | H   |
| ATOM | 2250 | HD13 | LEU | 142 | 20.570 | 32.809 | 18.360 | 0.00 | 0.00 | H   |
| ATOM | 2251 | HD21 | LEU | 142 | 21.947 | 35.403 | 16.194 | 0.00 | 0.00 | H   |
| ATOM | 2252 | HD22 | LEU | 142 | 21.628 | 33.919 | 15.371 | 0.00 | 0.00 | H   |
| ATOM | 2253 | HD23 | LEU | 142 | 20.502 | 34.435 | 16.619 | 0.00 | 0.00 | H   |
| ATOM | 2254 | N    | ALA | 143 | 25.769 | 34.851 | 19.140 | 0.00 | 0.00 | N   |
| ATOM | 2255 | CA   | ALA | 143 | 27.210 | 34.737 | 18.868 | 0.00 | 0.00 | C   |
| ATOM | 2256 | C    | ALA | 143 | 27.926 | 34.055 | 20.025 | 0.00 | 0.00 | C   |
| ATOM | 2257 | O    | ALA | 143 | 28.727 | 33.113 | 19.836 | 0.00 | 0.00 | O   |
| ATOM | 2258 | CB   | ALA | 143 | 27.871 | 36.075 | 18.578 | 0.00 | 0.00 | C   |
| ATOM | 2259 | H    | ALA | 143 | 25.408 | 35.795 | 19.148 | 0.00 | 0.00 | H   |
| ATOM | 2260 | HA   | ALA | 143 | 27.408 | 34.057 | 18.041 | 0.00 | 0.00 | H   |
| ATOM | 2261 | HB1  | ALA | 143 | 27.508 | 36.471 | 17.630 | 0.00 | 0.00 | H   |
| ATOM | 2262 | HB2  | ALA | 143 | 27.663 | 36.750 | 19.410 | 0.00 | 0.00 | H   |
| ATOM | 2263 | HB3  | ALA | 143 | 28.951 | 35.936 | 18.561 | 0.00 | 0.00 | H   |
| ATOM | 2264 | N    | LEU | 144 | 27.646 | 34.412 | 21.287 | 0.00 | 0.00 | N   |
| ATOM | 2265 | CA   | LEU | 144 | 28.036 | 33.619 | 22.409 | 0.00 | 0.00 | C   |
| ATOM | 2266 | C    | LEU | 144 | 27.440 | 32.151 | 22.439 | 0.00 | 0.00 | C   |
| ATOM | 2267 | O    | LEU | 144 | 28.212 | 31.247 | 22.771 | 0.00 | 0.00 | O   |
| ATOM | 2268 | CB   | LEU | 144 | 27.614 | 34.362 | 23.686 | 0.00 | 0.00 | C   |
| ATOM | 2269 | CG   | LEU | 144 | 28.022 | 33.647 | 25.039 | 0.00 | 0.00 | C   |
| ATOM | 2270 | CD1  | LEU | 144 | 29.546 | 33.699 | 25.257 | 0.00 | 0.00 | C   |
| ATOM | 2271 | CD2  | LEU | 144 | 27.307 | 34.374 | 26.202 | 0.00 | 0.00 | C   |
| ATOM | 2272 | H    | LEU | 144 | 26.937 | 35.124 | 21.390 | 0.00 | 0.00 | H   |
| ATOM | 2273 | HA   | LEU | 144 | 29.116 | 33.491 | 22.465 | 0.00 | 0.00 | H   |
| ATOM | 2274 | HB2  | LEU | 144 | 28.053 | 35.359 | 23.656 | 0.00 | 0.00 | H   |
| ATOM | 2275 | HB3  | LEU | 144 | 26.552 | 34.597 | 23.617 | 0.00 | 0.00 | H   |
| ATOM | 2276 | HG   | LEU | 144 | 27.829 | 32.574 | 25.067 | 0.00 | 0.00 | H   |
| ATOM | 2277 | HD11 | LEU | 144 | 29.883 | 34.720 | 25.082 | 0.00 | 0.00 | H   |
| ATOM | 2278 | HD12 | LEU | 144 | 29.864 | 33.270 | 26.207 | 0.00 | 0.00 | H   |
| ATOM | 2279 | HD13 | LEU | 144 | 30.051 | 33.045 | 24.546 | 0.00 | 0.00 | H   |
| ATOM | 2280 | HD21 | LEU | 144 | 26.252 | 34.118 | 26.108 | 0.00 | 0.00 | H   |
| ATOM | 2281 | HD22 | LEU | 144 | 27.506 | 35.438 | 26.062 | 0.00 | 0.00 | H   |
| ATOM | 2282 | HD23 | LEU | 144 | 27.697 | 34.099 | 27.181 | 0.00 | 0.00 | H   |
| ATOM | 2283 | N    | HIP | 145 | 26.214 | 31.885 | 21.996 | 0.00 | 0.00 | N   |
| ATOM | 2284 | CA   | HIP | 145 | 25.593 | 30.531 | 22.061 | 0.00 | 0.00 | C   |
| ATOM | 2285 | C    | HIP | 145 | 26.313 | 29.463 | 21.176 | 0.00 | 0.00 | C   |
| ATOM | 2286 | O    | HIP | 145 | 26.210 | 28.298 | 21.428 | 0.00 | 0.00 | O   |
| ATOM | 2287 | CB   | HIP | 145 | 24.106 | 30.685 | 21.618 | 0.00 | 0.00 | C   |
| ATOM | 2288 | CG   | HIP | 145 | 23.327 | 29.530 | 22.155 | 0.00 | 0.00 | C   |
| ATOM | 2289 | CD2  | HIP | 145 | 22.646 | 29.425 | 23.336 | 0.00 | 0.00 | C   |
| ATOM | 2290 | ND1  | HIP | 145 | 23.094 | 28.330 | 21.515 | 0.00 | 0.00 | N1+ |
| ATOM | 2291 | CE1  | HIP | 145 | 22.287 | 27.531 | 22.238 | 0.00 | 0.00 | C   |
| ATOM | 2292 | NE2  | HIP | 145 | 22.022 | 28.163 | 23.381 | 0.00 | 0.00 | N   |
| ATOM | 2293 | H    | HIP | 145 | 25.669 | 32.640 | 21.605 | 0.00 | 0.00 | H   |
| ATOM | 2294 | HA   | HIP | 145 | 25.667 | 30.158 | 23.082 | 0.00 | 0.00 | H   |
| ATOM | 2295 | HB2  | HIP | 145 | 23.652 | 31.578 | 22.047 | 0.00 | 0.00 | H   |
| ATOM | 2296 | HB3  | HIP | 145 | 24.066 | 30.771 | 20.532 | 0.00 | 0.00 | H   |
| ATOM | 2297 | HD1  | HIP | 145 | 23.520 | 28.117 | 20.625 | 0.00 | 0.00 | H   |
| ATOM | 2298 | HD2  | HIP | 145 | 22.546 | 30.170 | 24.112 | 0.00 | 0.00 | H   |
| ATOM | 2299 | HE1  | HIP | 145 | 21.931 | 26.591 | 21.843 | 0.00 | 0.00 | H   |
| ATOM | 2300 | HE2  | HIP | 145 | 21.340 | 27.922 | 24.086 | 0.00 | 0.00 | H   |
| ATOM | 2301 | N    | VAL | 146 | 26.968 | 29.929 | 20.111 | 0.00 | 0.00 | N   |
| ATOM | 2302 | CA   | VAL | 146 | 27.773 | 29.210 | 19.157 | 0.00 | 0.00 | C   |
| ATOM | 2303 | C    | VAL | 146 | 29.219 | 28.962 | 19.624 | 0.00 | 0.00 | C   |
| ATOM | 2304 | O    | VAL | 146 | 29.691 | 27.847 | 19.410 | 0.00 | 0.00 | O   |
| ATOM | 2305 | CB   | VAL | 146 | 27.771 | 30.077 | 17.824 | 0.00 | 0.00 | C   |
| ATOM | 2306 | CG1  | VAL | 146 | 28.726 | 29.442 | 16.778 | 0.00 | 0.00 | C   |
| ATOM | 2307 | CG2  | VAL | 146 | 26.541 | 30.310 | 17.083 | 0.00 | 0.00 | C   |
| ATOM | 2308 | H    | VAL | 146 | 26.933 | 30.936 | 20.045 | 0.00 | 0.00 | H   |
| ATOM | 2309 | HA   | VAL | 146 | 27.296 | 28.238 | 19.024 | 0.00 | 0.00 | H   |
| ATOM | 2310 | HB   | VAL | 146 | 28.121 | 31.088 | 18.032 | 0.00 | 0.00 | H   |
| ATOM | 2311 | HG11 | VAL | 146 | 28.343 | 28.500 | 16.386 | 0.00 | 0.00 | H   |
| ATOM | 2312 | HG12 | VAL | 146 | 28.772 | 30.166 | 15.963 | 0.00 | 0.00 | H   |
| ATOM | 2313 | HG13 | VAL | 146 | 29.743 | 29.363 | 17.162 | 0.00 | 0.00 | H   |
| ATOM | 2314 | HG21 | VAL | 146 | 26.597 | 31.262 | 16.554 | 0.00 | 0.00 | H   |
| ATOM | 2315 | HG22 | VAL | 146 | 26.251 | 29.529 | 16.381 | 0.00 | 0.00 | H   |
| ATOM | 2316 | HG23 | VAL | 146 | 25.751 | 30.519 | 17.803 | 0.00 | 0.00 | H   |
| ATOM | 2317 | N    | TYR | 147 | 29.830 | 29.895 | 20.362 | 0.00 | 0.00 | N   |
| ATOM | 2318 | CA   | TYR | 147 | 31.075 | 29.829 | 21.081 | 0.00 | 0.00 | C   |
| ATOM | 2319 | C    | TYR | 147 | 30.895 | 28.754 | 22.181 | 0.00 | 0.00 | C   |
| ATOM | 2320 | O    | TYR | 147 | 31.693 | 27.808 | 22.146 | 0.00 | 0.00 | O   |
| ATOM | 2321 | CB   | TYR | 147 | 31.453 | 31.241 | 21.655 | 0.00 | 0.00 | C   |
| ATOM | 2322 | CG   | TYR | 147 | 32.880 | 31.701 | 22.073 | 0.00 | 0.00 | C   |
| ATOM | 2323 | CD1  | TYR | 147 | 33.265 | 31.646 | 23.446 | 0.00 | 0.00 | C   |
| ATOM | 2324 | CD2  | TYR | 147 | 33.725 | 32.293 | 21.158 | 0.00 | 0.00 | C   |
| ATOM | 2325 | CE1  | TYR | 147 | 34.529 | 31.941 | 23.854 | 0.00 | 0.00 | C   |
| ATOM | 2326 | CE2  | TYR | 147 | 35.076 | 32.555 | 21.553 | 0.00 | 0.00 | C   |
| ATOM | 2327 | CZ   | TYR | 147 | 35.441 | 32.296 | 22.921 | 0.00 | 0.00 | C   |

|      |      |      |     |     |        |        |        |      |      |     |
|------|------|------|-----|-----|--------|--------|--------|------|------|-----|
| ATOM | 2328 | OH   | TYR | 147 | 36.727 | 32.598 | 23.270 | 0.00 | 0.00 | O   |
| ATOM | 2329 | H    | TYR | 147 | 29.271 | 30.735 | 20.413 | 0.00 | 0.00 | H   |
| ATOM | 2330 | HA   | TYR | 147 | 31.847 | 29.502 | 20.384 | 0.00 | 0.00 | H   |
| ATOM | 2331 | HB2  | TYR | 147 | 31.145 | 32.049 | 20.991 | 0.00 | 0.00 | H   |
| ATOM | 2332 | HB3  | TYR | 147 | 30.860 | 31.370 | 22.560 | 0.00 | 0.00 | H   |
| ATOM | 2333 | HD1  | TYR | 147 | 32.560 | 31.175 | 24.115 | 0.00 | 0.00 | H   |
| ATOM | 2334 | HD2  | TYR | 147 | 33.412 | 32.440 | 20.134 | 0.00 | 0.00 | H   |
| ATOM | 2335 | HE1  | TYR | 147 | 34.839 | 31.866 | 24.886 | 0.00 | 0.00 | H   |
| ATOM | 2336 | HE2  | TYR | 147 | 35.846 | 32.876 | 20.867 | 0.00 | 0.00 | H   |
| ATOM | 2337 | HH   | TYR | 147 | 36.923 | 32.655 | 24.207 | 0.00 | 0.00 | H   |
| ATOM | 2338 | N    | GLN | 148 | 29.904 | 28.860 | 22.996 | 0.00 | 0.00 | N   |
| ATOM | 2339 | CA   | GLN | 148 | 29.497 | 27.952 | 24.074 | 0.00 | 0.00 | C   |
| ATOM | 2340 | C    | GLN | 148 | 29.171 | 26.502 | 23.533 | 0.00 | 0.00 | C   |
| ATOM | 2341 | O    | GLN | 148 | 29.170 | 25.507 | 24.289 | 0.00 | 0.00 | O   |
| ATOM | 2342 | CB   | GLN | 148 | 28.248 | 28.504 | 24.865 | 0.00 | 0.00 | C   |
| ATOM | 2343 | CG   | GLN | 148 | 28.453 | 29.768 | 25.693 | 0.00 | 0.00 | C   |
| ATOM | 2344 | CD   | GLN | 148 | 29.034 | 29.394 | 27.067 | 0.00 | 0.00 | C   |
| ATOM | 2345 | NE2  | GLN | 148 | 28.274 | 29.374 | 28.100 | 0.00 | 0.00 | N   |
| ATOM | 2346 | OE1  | GLN | 148 | 30.200 | 29.158 | 27.156 | 0.00 | 0.00 | O   |
| ATOM | 2347 | H    | GLN | 148 | 29.420 | 29.745 | 22.932 | 0.00 | 0.00 | H   |
| ATOM | 2348 | HA   | GLN | 148 | 30.331 | 27.858 | 24.769 | 0.00 | 0.00 | H   |
| ATOM | 2349 | HB2  | GLN | 148 | 27.350 | 28.561 | 24.250 | 0.00 | 0.00 | H   |
| ATOM | 2350 | HB3  | GLN | 148 | 27.906 | 27.767 | 25.591 | 0.00 | 0.00 | H   |
| ATOM | 2351 | HG2  | GLN | 148 | 29.080 | 30.487 | 25.166 | 0.00 | 0.00 | H   |
| ATOM | 2352 | HG3  | GLN | 148 | 27.497 | 30.284 | 25.773 | 0.00 | 0.00 | H   |
| ATOM | 2353 | HE21 | GLN | 148 | 28.665 | 29.151 | 29.003 | 0.00 | 0.00 | H   |
| ATOM | 2354 | HE22 | GLN | 148 | 27.304 | 29.647 | 28.032 | 0.00 | 0.00 | H   |
| ATOM | 2355 | N    | HIP | 149 | 28.932 | 26.365 | 22.190 | 0.00 | 0.00 | N   |
| ATOM | 2356 | CA   | HIP | 149 | 28.767 | 25.074 | 21.522 | 0.00 | 0.00 | C   |
| ATOM | 2357 | C    | HIP | 149 | 30.128 | 24.406 | 21.126 | 0.00 | 0.00 | C   |
| ATOM | 2358 | O    | HIP | 149 | 30.197 | 23.608 | 20.256 | 0.00 | 0.00 | O   |
| ATOM | 2359 | CB   | HIP | 149 | 27.718 | 25.106 | 20.444 | 0.00 | 0.00 | C   |
| ATOM | 2360 | CG   | HIP | 149 | 27.287 | 23.758 | 19.994 | 0.00 | 0.00 | C   |
| ATOM | 2361 | CD2  | HIP | 149 | 27.493 | 23.287 | 18.691 | 0.00 | 0.00 | C   |
| ATOM | 2362 | ND1  | HIP | 149 | 26.602 | 22.742 | 20.696 | 0.00 | 0.00 | N1+ |
| ATOM | 2363 | CE1  | HIP | 149 | 26.332 | 21.717 | 19.858 | 0.00 | 0.00 | C   |
| ATOM | 2364 | NE2  | HIP | 149 | 26.861 | 22.067 | 18.596 | 0.00 | 0.00 | N   |
| ATOM | 2365 | H    | HIP | 149 | 28.751 | 27.201 | 21.651 | 0.00 | 0.00 | H   |
| ATOM | 2366 | HA   | HIP | 149 | 28.275 | 24.440 | 22.260 | 0.00 | 0.00 | H   |
| ATOM | 2367 | HB2  | HIP | 149 | 26.785 | 25.556 | 20.782 | 0.00 | 0.00 | H   |
| ATOM | 2368 | HB3  | HIP | 149 | 28.059 | 25.727 | 19.616 | 0.00 | 0.00 | H   |
| ATOM | 2369 | HD1  | HIP | 149 | 26.058 | 22.926 | 21.526 | 0.00 | 0.00 | H   |
| ATOM | 2370 | HD2  | HIP | 149 | 27.968 | 23.890 | 17.932 | 0.00 | 0.00 | H   |
| ATOM | 2371 | HE1  | HIP | 149 | 25.811 | 20.823 | 20.164 | 0.00 | 0.00 | H   |
| ATOM | 2372 | HE2  | HIP | 149 | 26.878 | 21.416 | 17.825 | 0.00 | 0.00 | H   |
| ATOM | 2373 | N    | GLY | 150 | 31.256 | 24.871 | 21.643 | 0.00 | 0.00 | N   |
| ATOM | 2374 | CA   | GLY | 150 | 32.645 | 24.441 | 21.256 | 0.00 | 0.00 | C   |
| ATOM | 2375 | C    | GLY | 150 | 33.126 | 25.112 | 19.919 | 0.00 | 0.00 | C   |
| ATOM | 2376 | O    | GLY | 150 | 34.328 | 25.297 | 19.747 | 0.00 | 0.00 | O   |
| ATOM | 2377 | H    | GLY | 150 | 31.240 | 25.650 | 22.286 | 0.00 | 0.00 | H   |
| ATOM | 2378 | HA2  | GLY | 150 | 33.346 | 24.841 | 21.988 | 0.00 | 0.00 | H   |
| ATOM | 2379 | HA3  | GLY | 150 | 32.739 | 23.356 | 21.219 | 0.00 | 0.00 | H   |
| ATOM | 2380 | N    | LEU | 151 | 32.185 | 25.738 | 19.165 | 0.00 | 0.00 | N   |
| ATOM | 2381 | CA   | LEU | 151 | 32.516 | 26.546 | 17.981 | 0.00 | 0.00 | C   |
| ATOM | 2382 | C    | LEU | 151 | 33.168 | 27.941 | 18.289 | 0.00 | 0.00 | C   |
| ATOM | 2383 | O    | LEU | 151 | 32.934 | 28.918 | 17.552 | 0.00 | 0.00 | O   |
| ATOM | 2384 | CB   | LEU | 151 | 31.436 | 26.589 | 16.879 | 0.00 | 0.00 | C   |
| ATOM | 2385 | CG   | LEU | 151 | 30.587 | 25.318 | 16.654 | 0.00 | 0.00 | C   |
| ATOM | 2386 | CD1  | LEU | 151 | 29.212 | 25.597 | 16.019 | 0.00 | 0.00 | C   |
| ATOM | 2387 | CD2  | LEU | 151 | 31.332 | 24.191 | 15.977 | 0.00 | 0.00 | C   |
| ATOM | 2388 | H    | LEU | 151 | 31.208 | 25.593 | 19.379 | 0.00 | 0.00 | H   |
| ATOM | 2389 | HA   | LEU | 151 | 33.347 | 26.051 | 17.478 | 0.00 | 0.00 | H   |
| ATOM | 2390 | HB2  | LEU | 151 | 30.797 | 27.446 | 17.094 | 0.00 | 0.00 | H   |
| ATOM | 2391 | HB3  | LEU | 151 | 31.908 | 26.752 | 15.911 | 0.00 | 0.00 | H   |
| ATOM | 2392 | HG   | LEU | 151 | 30.208 | 24.954 | 17.609 | 0.00 | 0.00 | H   |
| ATOM | 2393 | HD11 | LEU | 151 | 28.554 | 26.279 | 16.556 | 0.00 | 0.00 | H   |
| ATOM | 2394 | HD12 | LEU | 151 | 29.413 | 26.130 | 15.089 | 0.00 | 0.00 | H   |
| ATOM | 2395 | HD13 | LEU | 151 | 28.673 | 24.672 | 15.812 | 0.00 | 0.00 | H   |
| ATOM | 2396 | HD21 | LEU | 151 | 30.616 | 23.385 | 15.817 | 0.00 | 0.00 | H   |
| ATOM | 2397 | HD22 | LEU | 151 | 31.592 | 24.531 | 14.974 | 0.00 | 0.00 | H   |
| ATOM | 2398 | HD23 | LEU | 151 | 32.181 | 23.760 | 16.506 | 0.00 | 0.00 | H   |
| ATOM | 2399 | N    | THR | 152 | 34.071 | 27.990 | 19.209 | 0.00 | 0.00 | N   |
| ATOM | 2400 | CA   | THR | 152 | 34.727 | 29.297 | 19.604 | 0.00 | 0.00 | C   |
| ATOM | 2401 | C    | THR | 152 | 35.516 | 29.957 | 18.433 | 0.00 | 0.00 | C   |
| ATOM | 2402 | O    | THR | 152 | 35.527 | 31.180 | 18.227 | 0.00 | 0.00 | O   |
| ATOM | 2403 | CB   | THR | 152 | 35.807 | 29.251 | 20.706 | 0.00 | 0.00 | C   |
| ATOM | 2404 | CG2  | THR | 152 | 35.130 | 28.880 | 22.061 | 0.00 | 0.00 | C   |
| ATOM | 2405 | OG1  | THR | 152 | 36.782 | 28.333 | 20.419 | 0.00 | 0.00 | O   |
| ATOM | 2406 | H    | THR | 152 | 34.306 | 27.180 | 19.765 | 0.00 | 0.00 | H   |
| ATOM | 2407 | HA   | THR | 152 | 33.895 | 29.964 | 19.824 | 0.00 | 0.00 | H   |
| ATOM | 2408 | HB   | THR | 152 | 36.310 | 30.207 | 20.851 | 0.00 | 0.00 | H   |
| ATOM | 2409 | HG1  | THR | 152 | 37.241 | 28.114 | 21.234 | 0.00 | 0.00 | H   |
| ATOM | 2410 | HG21 | THR | 152 | 34.382 | 29.664 | 22.171 | 0.00 | 0.00 | H   |
| ATOM | 2411 | HG22 | THR | 152 | 34.706 | 27.881 | 21.963 | 0.00 | 0.00 | H   |
| ATOM | 2412 | HG23 | THR | 152 | 35.883 | 28.951 | 22.846 | 0.00 | 0.00 | H   |
| ATOM | 2413 | N    | GLY | 153 | 36.068 | 29.075 | 17.574 | 0.00 | 0.00 | N   |
| ATOM | 2414 | CA   | GLY | 153 | 36.923 | 29.327 | 16.470 | 0.00 | 0.00 | C   |
| ATOM | 2415 | C    | GLY | 153 | 36.258 | 30.071 | 15.280 | 0.00 | 0.00 | C   |
| ATOM | 2416 | O    | GLY | 153 | 36.933 | 30.638 | 14.444 | 0.00 | 0.00 | O   |
| ATOM | 2417 | H    | GLY | 153 | 35.940 | 28.107 | 17.834 | 0.00 | 0.00 | H   |
| ATOM | 2418 | HA2  | GLY | 153 | 37.864 | 29.726 | 16.848 | 0.00 | 0.00 | H   |
| ATOM | 2419 | HA3  | GLY | 153 | 37.196 | 28.366 | 16.033 | 0.00 | 0.00 | H   |
| ATOM | 2420 | N    | PHE | 154 | 34.915 | 30.193 | 15.313 | 0.00 | 0.00 | N   |
| ATOM | 2421 | CA   | PHE | 154 | 34.073 | 30.677 | 14.252 | 0.00 | 0.00 | C   |
| ATOM | 2422 | C    | PHE | 154 | 33.583 | 32.151 | 14.517 | 0.00 | 0.00 | C   |
| ATOM | 2423 | O    | PHE | 154 | 32.738 | 32.647 | 13.864 | 0.00 | 0.00 | O   |
| ATOM | 2424 | CB   | PHE | 154 | 32.915 | 29.657 | 14.071 | 0.00 | 0.00 | C   |
| ATOM | 2425 | CG   | PHE | 154 | 33.260 | 28.319 | 13.358 | 0.00 | 0.00 | C   |
| ATOM | 2426 | CD1  | PHE | 154 | 33.621 | 27.232 | 14.174 | 0.00 | 0.00 | C   |
| ATOM | 2427 | CD2  | PHE | 154 | 33.310 | 28.176 | 11.940 | 0.00 | 0.00 | C   |
| ATOM | 2428 | CE1  | PHE | 154 | 33.877 | 25.969 | 13.626 | 0.00 | 0.00 | C   |
| ATOM | 2429 | CE2  | PHE | 154 | 33.528 | 26.911 | 11.334 | 0.00 | 0.00 | C   |
| ATOM | 2430 | CZ   | PHE | 154 | 33.759 | 25.832 | 12.201 | 0.00 | 0.00 | C   |
| ATOM | 2431 | H    | PHE | 154 | 34.447 | 29.930 | 16.167 | 0.00 | 0.00 | H   |
| ATOM | 2432 | HA   | PHE | 154 | 34.636 | 30.528 | 13.331 | 0.00 | 0.00 | H   |

|      |      |      |     |     |        |        |        |      |      |     |
|------|------|------|-----|-----|--------|--------|--------|------|------|-----|
| ATOM | 2433 | HB2  | PHE | 154 | 32.450 | 29.513 | 15.046 | 0.00 | 0.00 | H   |
| ATOM | 2434 | HB3  | PHE | 154 | 32.098 | 30.080 | 13.484 | 0.00 | 0.00 | H   |
| ATOM | 2435 | HD1  | PHE | 154 | 33.657 | 27.551 | 15.206 | 0.00 | 0.00 | H   |
| ATOM | 2436 | HD2  | PHE | 154 | 33.141 | 29.051 | 11.331 | 0.00 | 0.00 | H   |
| ATOM | 2437 | HE1  | PHE | 154 | 33.907 | 25.078 | 14.235 | 0.00 | 0.00 | H   |
| ATOM | 2438 | HE2  | PHE | 154 | 33.290 | 26.808 | 10.286 | 0.00 | 0.00 | H   |
| ATOM | 2439 | HZ   | PHE | 154 | 33.877 | 24.903 | 11.663 | 0.00 | 0.00 | H   |
| ATOM | 2440 | N    | LEU | 155 | 34.014 | 32.736 | 15.597 | 0.00 | 0.00 | N   |
| ATOM | 2441 | CA   | LEU | 155 | 33.419 | 34.104 | 15.965 | 0.00 | 0.00 | C   |
| ATOM | 2442 | C    | LEU | 155 | 33.742 | 35.223 | 14.953 | 0.00 | 0.00 | C   |
| ATOM | 2443 | O    | LEU | 155 | 33.100 | 36.278 | 14.924 | 0.00 | 0.00 | O   |
| ATOM | 2444 | CB   | LEU | 155 | 33.796 | 34.442 | 17.400 | 0.00 | 0.00 | C   |
| ATOM | 2445 | CG   | LEU | 155 | 33.229 | 35.756 | 18.008 | 0.00 | 0.00 | C   |
| ATOM | 2446 | CD1  | LEU | 155 | 31.698 | 35.579 | 18.058 | 0.00 | 0.00 | C   |
| ATOM | 2447 | CD2  | LEU | 155 | 33.805 | 35.970 | 19.335 | 0.00 | 0.00 | C   |
| ATOM | 2448 | H    | LEU | 155 | 34.730 | 32.411 | 16.230 | 0.00 | 0.00 | H   |
| ATOM | 2449 | HA   | LEU | 155 | 32.330 | 34.045 | 15.935 | 0.00 | 0.00 | H   |
| ATOM | 2450 | HB2  | LEU | 155 | 33.401 | 33.616 | 17.991 | 0.00 | 0.00 | H   |
| ATOM | 2451 | HB3  | LEU | 155 | 34.859 | 34.445 | 17.641 | 0.00 | 0.00 | H   |
| ATOM | 2452 | HG   | LEU | 155 | 33.478 | 36.593 | 17.357 | 0.00 | 0.00 | H   |
| ATOM | 2453 | HD11 | LEU | 155 | 31.194 | 35.703 | 17.099 | 0.00 | 0.00 | H   |
| ATOM | 2454 | HD12 | LEU | 155 | 31.467 | 34.570 | 18.400 | 0.00 | 0.00 | H   |
| ATOM | 2455 | HD13 | LEU | 155 | 31.307 | 36.383 | 18.681 | 0.00 | 0.00 | H   |
| ATOM | 2456 | HD21 | LEU | 155 | 33.159 | 35.520 | 20.088 | 0.00 | 0.00 | H   |
| ATOM | 2457 | HD22 | LEU | 155 | 34.782 | 35.501 | 19.457 | 0.00 | 0.00 | H   |
| ATOM | 2458 | HD23 | LEU | 155 | 33.912 | 37.048 | 19.460 | 0.00 | 0.00 | H   |
| ATOM | 2459 | N    | GLY | 156 | 34.747 | 35.041 | 14.053 | 0.00 | 0.00 | N   |
| ATOM | 2460 | CA   | GLY | 156 | 35.096 | 35.928 | 12.887 | 0.00 | 0.00 | C   |
| ATOM | 2461 | C    | GLY | 156 | 34.060 | 35.693 | 11.796 | 0.00 | 0.00 | C   |
| ATOM | 2462 | O    | GLY | 156 | 33.736 | 36.616 | 11.081 | 0.00 | 0.00 | O   |
| ATOM | 2463 | H    | GLY | 156 | 35.361 | 34.241 | 14.116 | 0.00 | 0.00 | H   |
| ATOM | 2464 | HA2  | GLY | 156 | 35.066 | 36.963 | 13.229 | 0.00 | 0.00 | H   |
| ATOM | 2465 | HA3  | GLY | 156 | 36.098 | 35.614 | 12.595 | 0.00 | 0.00 | H   |
| ATOM | 2466 | N    | GLN | 157 | 33.670 | 34.455 | 11.660 | 0.00 | 0.00 | N   |
| ATOM | 2467 | CA   | GLN | 157 | 32.652 | 34.025 | 10.691 | 0.00 | 0.00 | C   |
| ATOM | 2468 | C    | GLN | 157 | 31.293 | 34.530 | 11.058 | 0.00 | 0.00 | C   |
| ATOM | 2469 | O    | GLN | 157 | 30.661 | 35.098 | 10.211 | 0.00 | 0.00 | O   |
| ATOM | 2470 | CB   | GLN | 157 | 32.716 | 32.491 | 10.478 | 0.00 | 0.00 | C   |
| ATOM | 2471 | CG   | GLN | 157 | 33.991 | 31.960 | 9.827  | 0.00 | 0.00 | C   |
| ATOM | 2472 | CD   | GLN | 157 | 34.286 | 32.727 | 8.568  | 0.00 | 0.00 | C   |
| ATOM | 2473 | NE2  | GLN | 157 | 33.774 | 32.435 | 7.404  | 0.00 | 0.00 | N   |
| ATOM | 2474 | OE1  | GLN | 157 | 34.946 | 33.722 | 8.561  | 0.00 | 0.00 | O   |
| ATOM | 2475 | H    | GLN | 157 | 34.010 | 33.760 | 12.312 | 0.00 | 0.00 | H   |
| ATOM | 2476 | HA   | GLN | 157 | 32.759 | 34.512 | 9.722  | 0.00 | 0.00 | H   |
| ATOM | 2477 | HB2  | GLN | 157 | 32.540 | 32.005 | 11.437 | 0.00 | 0.00 | H   |
| ATOM | 2478 | HB3  | GLN | 157 | 31.820 | 32.218 | 9.920  | 0.00 | 0.00 | H   |
| ATOM | 2479 | HG2  | GLN | 157 | 34.791 | 32.072 | 10.559 | 0.00 | 0.00 | H   |
| ATOM | 2480 | HG3  | GLN | 157 | 33.903 | 30.899 | 9.589  | 0.00 | 0.00 | H   |
| ATOM | 2481 | HE21 | GLN | 157 | 33.950 | 33.138 | 6.701  | 0.00 | 0.00 | H   |
| ATOM | 2482 | HE22 | GLN | 157 | 33.345 | 31.531 | 7.263  | 0.00 | 0.00 | H   |
| ATOM | 2483 | N    | VAL | 158 | 30.941 | 34.478 | 12.343 | 0.00 | 0.00 | N   |
| ATOM | 2484 | CA   | VAL | 158 | 29.624 | 35.035 | 12.844 | 0.00 | 0.00 | C   |
| ATOM | 2485 | C    | VAL | 158 | 29.672 | 36.516 | 12.617 | 0.00 | 0.00 | C   |
| ATOM | 2486 | O    | VAL | 158 | 28.719 | 37.050 | 12.086 | 0.00 | 0.00 | O   |
| ATOM | 2487 | CB   | VAL | 158 | 29.440 | 34.731 | 14.339 | 0.00 | 0.00 | C   |
| ATOM | 2488 | CG1  | VAL | 158 | 28.195 | 35.342 | 14.994 | 0.00 | 0.00 | C   |
| ATOM | 2489 | CG2  | VAL | 158 | 29.432 | 33.236 | 14.550 | 0.00 | 0.00 | C   |
| ATOM | 2490 | H    | VAL | 158 | 31.539 | 34.030 | 13.023 | 0.00 | 0.00 | H   |
| ATOM | 2491 | HA   | VAL | 158 | 28.781 | 34.007 | 12.302 | 0.00 | 0.00 | H   |
| ATOM | 2492 | HB   | VAL | 158 | 30.300 | 35.043 | 14.931 | 0.00 | 0.00 | H   |
| ATOM | 2493 | HG11 | VAL | 158 | 27.269 | 35.071 | 14.488 | 0.00 | 0.00 | H   |
| ATOM | 2494 | HG12 | VAL | 158 | 28.187 | 35.088 | 16.053 | 0.00 | 0.00 | H   |
| ATOM | 2495 | HG13 | VAL | 158 | 28.292 | 36.426 | 15.036 | 0.00 | 0.00 | H   |
| ATOM | 2496 | HG21 | VAL | 158 | 30.443 | 32.833 | 14.598 | 0.00 | 0.00 | H   |
| ATOM | 2497 | HG22 | VAL | 158 | 28.943 | 33.074 | 15.511 | 0.00 | 0.00 | H   |
| ATOM | 2498 | HG23 | VAL | 158 | 28.939 | 32.633 | 13.788 | 0.00 | 0.00 | H   |
| ATOM | 2499 | N    | THR | 159 | 30.725 | 37.231 | 12.944 | 0.00 | 0.00 | N   |
| ATOM | 2500 | CA   | THR | 159 | 30.992 | 38.625 | 12.657 | 0.00 | 0.00 | C   |
| ATOM | 2501 | C    | THR | 159 | 30.652 | 38.967 | 11.191 | 0.00 | 0.00 | C   |
| ATOM | 2502 | O    | THR | 159 | 29.874 | 39.852 | 10.902 | 0.00 | 0.00 | O   |
| ATOM | 2503 | CB   | THR | 159 | 32.458 | 38.933 | 13.015 | 0.00 | 0.00 | C   |
| ATOM | 2504 | CG2  | THR | 159 | 32.779 | 40.339 | 12.585 | 0.00 | 0.00 | C   |
| ATOM | 2505 | OG1  | THR | 159 | 32.498 | 38.849 | 14.397 | 0.00 | 0.00 | O   |
| ATOM | 2506 | H    | THR | 159 | 31.460 | 36.767 | 13.458 | 0.00 | 0.00 | H   |
| ATOM | 2507 | HA   | THR | 159 | 30.330 | 39.191 | 13.313 | 0.00 | 0.00 | H   |
| ATOM | 2508 | HB   | THR | 159 | 33.114 | 38.180 | 12.578 | 0.00 | 0.00 | H   |
| ATOM | 2509 | HG1  | THR | 159 | 32.958 | 38.038 | 14.625 | 0.00 | 0.00 | H   |
| ATOM | 2510 | HG21 | THR | 159 | 32.645 | 40.488 | 11.515 | 0.00 | 0.00 | H   |
| ATOM | 2511 | HG22 | THR | 159 | 32.124 | 41.080 | 13.045 | 0.00 | 0.00 | H   |
| ATOM | 2512 | HG23 | THR | 159 | 33.809 | 40.552 | 12.873 | 0.00 | 0.00 | H   |
| ATOM | 2513 | N    | ARG | 160 | 31.227 | 38.207 | 10.241 | 0.00 | 0.00 | N   |
| ATOM | 2514 | CA   | ARG | 160 | 30.972 | 38.405 | 8.822  | 0.00 | 0.00 | C   |
| ATOM | 2515 | C    | ARG | 160 | 29.545 | 38.315 | 8.426  | 0.00 | 0.00 | C   |
| ATOM | 2516 | O    | ARG | 160 | 29.144 | 39.260 | 7.806  | 0.00 | 0.00 | O   |
| ATOM | 2517 | CB   | ARG | 160 | 31.901 | 37.464 | 8.033  | 0.00 | 0.00 | C   |
| ATOM | 2518 | CG   | ARG | 160 | 31.730 | 37.795 | 6.504  | 0.00 | 0.00 | C   |
| ATOM | 2519 | CD   | ARG | 160 | 31.850 | 39.252 | 6.037  | 0.00 | 0.00 | C   |
| ATOM | 2520 | NE   | ARG | 160 | 33.250 | 39.698 | 5.950  | 0.00 | 0.00 | N   |
| ATOM | 2521 | CZ   | ARG | 160 | 33.778 | 40.634 | 6.737  | 0.00 | 0.00 | C   |
| ATOM | 2522 | NH1  | ARG | 160 | 35.015 | 40.718 | 6.998  | 0.00 | 0.00 | N1+ |
| ATOM | 2523 | NH2  | ARG | 160 | 33.110 | 41.635 | 7.118  | 0.00 | 0.00 | N   |
| ATOM | 2524 | H    | ARG | 160 | 31.908 | 37.506 | 10.501 | 0.00 | 0.00 | H   |
| ATOM | 2525 | HA   | ARG | 160 | 31.296 | 39.425 | 8.619  | 0.00 | 0.00 | H   |
| ATOM | 2526 | HB2  | ARG | 160 | 32.952 | 37.552 | 8.305  | 0.00 | 0.00 | H   |
| ATOM | 2527 | HB3  | ARG | 160 | 31.540 | 36.450 | 8.209  | 0.00 | 0.00 | H   |
| ATOM | 2528 | HG2  | ARG | 160 | 32.547 | 37.242 | 6.041  | 0.00 | 0.00 | H   |
| ATOM | 2529 | HG3  | ARG | 160 | 30.806 | 37.296 | 6.213  | 0.00 | 0.00 | H   |
| ATOM | 2530 | HD2  | ARG | 160 | 31.409 | 39.275 | 5.040  | 0.00 | 0.00 | H   |
| ATOM | 2531 | HD3  | ARG | 160 | 31.263 | 39.890 | 6.698  | 0.00 | 0.00 | H   |
| ATOM | 2532 | HE   | ARG | 160 | 33.922 | 39.071 | 5.529  | 0.00 | 0.00 | H   |
| ATOM | 2533 | HH11 | ARG | 160 | 35.646 | 40.028 | 6.616  | 0.00 | 0.00 | H   |
| ATOM | 2534 | HH12 | ARG | 160 | 35.326 | 41.504 | 7.551  | 0.00 | 0.00 | H   |
| ATOM | 2535 | HH21 | ARG | 160 | 32.218 | 41.855 | 6.699  | 0.00 | 0.00 | H   |
| ATOM | 2536 | HH22 | ARG | 160 | 33.686 | 42.389 | 7.464  | 0.00 | 0.00 | H   |
| ATOM | 2537 | N    | PHE | 161 | 28.795 | 37.300 | 8.851  | 0.00 | 0.00 | N   |

|      |      |      |     |     |        |        |        |      |      |     |
|------|------|------|-----|-----|--------|--------|--------|------|------|-----|
| ATOM | 2538 | CA   | PHE | 161 | 27.364 | 37.217 | 8.721  | 0.00 | 0.00 | C   |
| ATOM | 2539 | C    | PHE | 161 | 26.671 | 38.506 | 9.190  | 0.00 | 0.00 | C   |
| ATOM | 2540 | O    | PHE | 161 | 25.902 | 39.067 | 8.409  | 0.00 | 0.00 | O   |
| ATOM | 2541 | CB   | PHE | 161 | 26.709 | 36.005 | 9.451  | 0.00 | 0.00 | C   |
| ATOM | 2542 | CG   | PHE | 161 | 25.249 | 35.804 | 9.045  | 0.00 | 0.00 | C   |
| ATOM | 2543 | CD1  | PHE | 161 | 24.158 | 36.457 | 9.708  | 0.00 | 0.00 | C   |
| ATOM | 2544 | CD2  | PHE | 161 | 25.013 | 34.968 | 7.930  | 0.00 | 0.00 | C   |
| ATOM | 2545 | CE1  | PHE | 161 | 22.874 | 36.453 | 9.078  | 0.00 | 0.00 | C   |
| ATOM | 2546 | CE2  | PHE | 161 | 23.756 | 34.738 | 7.447  | 0.00 | 0.00 | C   |
| ATOM | 2547 | CZ   | PHE | 161 | 22.703 | 35.521 | 7.967  | 0.00 | 0.00 | C   |
| ATOM | 2548 | H    | PHE | 161 | 29.250 | 36.670 | 9.496  | 0.00 | 0.00 | H   |
| ATOM | 2549 | HA   | PHE | 161 | 27.042 | 37.177 | 7.680  | 0.00 | 0.00 | H   |
| ATOM | 2550 | HB2  | PHE | 161 | 27.267 | 35.079 | 9.323  | 0.00 | 0.00 | H   |
| ATOM | 2551 | HB3  | PHE | 161 | 26.755 | 36.272 | 10.507 | 0.00 | 0.00 | H   |
| ATOM | 2552 | HD1  | PHE | 161 | 24.349 | 37.002 | 10.622 | 0.00 | 0.00 | H   |
| ATOM | 2553 | HD2  | PHE | 161 | 25.837 | 34.414 | 7.504  | 0.00 | 0.00 | H   |
| ATOM | 2554 | HE1  | PHE | 161 | 22.045 | 37.060 | 9.409  | 0.00 | 0.00 | H   |
| ATOM | 2555 | HE2  | PHE | 161 | 23.511 | 34.087 | 6.621  | 0.00 | 0.00 | H   |
| ATOM | 2556 | HZ   | PHE | 161 | 21.696 | 35.416 | 7.591  | 0.00 | 0.00 | H   |
| ATOM | 2557 | N    | VAL | 162 | 26.954 | 39.032 | 10.390 | 0.00 | 0.00 | N   |
| ATOM | 2558 | CA   | VAL | 162 | 26.353 | 40.218 | 10.970 | 0.00 | 0.00 | C   |
| ATOM | 2559 | C    | VAL | 162 | 26.665 | 41.520 | 10.223 | 0.00 | 0.00 | C   |
| ATOM | 2560 | O    | VAL | 162 | 25.795 | 42.353 | 10.030 | 0.00 | 0.00 | O   |
| ATOM | 2561 | CB   | VAL | 162 | 26.726 | 40.335 | 12.449 | 0.00 | 0.00 | C   |
| ATOM | 2562 | CG1  | VAL | 162 | 26.369 | 41.678 | 13.126 | 0.00 | 0.00 | C   |
| ATOM | 2563 | CG2  | VAL | 162 | 26.038 | 39.294 | 13.281 | 0.00 | 0.00 | C   |
| ATOM | 2564 | H    | VAL | 162 | 27.661 | 38.522 | 10.902 | 0.00 | 0.00 | H   |
| ATOM | 2565 | HA   | VAL | 162 | 25.285 | 40.004 | 11.014 | 0.00 | 0.00 | H   |
| ATOM | 2566 | HB   | VAL | 162 | 27.805 | 40.199 | 12.516 | 0.00 | 0.00 | H   |
| ATOM | 2567 | HG11 | VAL | 162 | 25.291 | 41.830 | 13.179 | 0.00 | 0.00 | H   |
| ATOM | 2568 | HG12 | VAL | 162 | 26.844 | 41.745 | 14.106 | 0.00 | 0.00 | H   |
| ATOM | 2569 | HG13 | VAL | 162 | 26.757 | 42.501 | 12.526 | 0.00 | 0.00 | H   |
| ATOM | 2570 | HG21 | VAL | 162 | 24.957 | 39.425 | 13.339 | 0.00 | 0.00 | H   |
| ATOM | 2571 | HG22 | VAL | 162 | 26.318 | 38.345 | 12.825 | 0.00 | 0.00 | H   |
| ATOM | 2572 | HG23 | VAL | 162 | 26.395 | 39.220 | 14.308 | 0.00 | 0.00 | H   |
| ATOM | 2573 | N    | VAL | 163 | 27.877 | 41.672 | 9.776  | 0.00 | 0.00 | N   |
| ATOM | 2574 | CA   | VAL | 163 | 28.352 | 42.824 | 8.942  | 0.00 | 0.00 | C   |
| ATOM | 2575 | C    | VAL | 163 | 27.849 | 42.808 | 7.502  | 0.00 | 0.00 | C   |
| ATOM | 2576 | O    | VAL | 163 | 27.280 | 43.786 | 7.026  | 0.00 | 0.00 | O   |
| ATOM | 2577 | CB   | VAL | 163 | 29.921 | 43.010 | 9.113  | 0.00 | 0.00 | C   |
| ATOM | 2578 | CG1  | VAL | 163 | 30.365 | 44.224 | 8.281  | 0.00 | 0.00 | C   |
| ATOM | 2579 | CG2  | VAL | 163 | 30.321 | 43.129 | 10.588 | 0.00 | 0.00 | C   |
| ATOM | 2580 | H    | VAL | 163 | 28.507 | 40.944 | 10.082 | 0.00 | 0.00 | H   |
| ATOM | 2581 | HA   | VAL | 163 | 27.967 | 43.717 | 9.435  | 0.00 | 0.00 | H   |
| ATOM | 2582 | HB   | VAL | 163 | 30.367 | 42.080 | 8.758  | 0.00 | 0.00 | H   |
| ATOM | 2583 | HG11 | VAL | 163 | 29.924 | 45.189 | 8.529  | 0.00 | 0.00 | H   |
| ATOM | 2584 | HG12 | VAL | 163 | 31.399 | 44.348 | 8.601  | 0.00 | 0.00 | H   |
| ATOM | 2585 | HG13 | VAL | 163 | 30.303 | 44.133 | 7.196  | 0.00 | 0.00 | H   |
| ATOM | 2586 | HG21 | VAL | 163 | 29.967 | 42.286 | 11.181 | 0.00 | 0.00 | H   |
| ATOM | 2587 | HG22 | VAL | 163 | 31.400 | 43.274 | 10.546 | 0.00 | 0.00 | H   |
| ATOM | 2588 | HG23 | VAL | 163 | 29.814 | 44.028 | 10.941 | 0.00 | 0.00 | H   |
| ATOM | 2589 | N    | ASP | 164 | 27.863 | 41.635 | 6.853  | 0.00 | 0.00 | N   |
| ATOM | 2590 | CA   | ASP | 164 | 27.099 | 41.366 | 5.672  | 0.00 | 0.00 | C   |
| ATOM | 2591 | C    | ASP | 164 | 25.642 | 41.652 | 5.814  | 0.00 | 0.00 | C   |
| ATOM | 2592 | O    | ASP | 164 | 25.035 | 42.209 | 4.910  | 0.00 | 0.00 | O   |
| ATOM | 2593 | CB   | ASP | 164 | 27.310 | 39.860 | 5.339  | 0.00 | 0.00 | C   |
| ATOM | 2594 | CG   | ASP | 164 | 26.830 | 39.591 | 3.921  | 0.00 | 0.00 | C   |
| ATOM | 2595 | OD1  | ASP | 164 | 25.607 | 39.514 | 3.688  | 0.00 | 0.00 | O   |
| ATOM | 2596 | OD2  | ASP | 164 | 27.620 | 39.786 | 2.967  | 0.00 | 0.00 | O1- |
| ATOM | 2597 | H    | ASP | 164 | 28.248 | 40.853 | 7.362  | 0.00 | 0.00 | H   |
| ATOM | 2598 | HA   | ASP | 164 | 27.535 | 42.026 | 4.923  | 0.00 | 0.00 | H   |
| ATOM | 2599 | HB2  | ASP | 164 | 28.361 | 39.573 | 5.375  | 0.00 | 0.00 | H   |
| ATOM | 2600 | HB3  | ASP | 164 | 26.706 | 39.266 | 6.027  | 0.00 | 0.00 | H   |
| ATOM | 2601 | N    | PHE | 165 | 25.039 | 41.387 | 7.017  | 0.00 | 0.00 | N   |
| ATOM | 2602 | CA   | PHE | 165 | 23.550 | 41.522 | 7.175  | 0.00 | 0.00 | C   |
| ATOM | 2603 | C    | PHE | 165 | 23.197 | 43.013 | 7.239  | 0.00 | 0.00 | C   |
| ATOM | 2604 | O    | PHE | 165 | 22.446 | 43.505 | 6.400  | 0.00 | 0.00 | O   |
| ATOM | 2605 | CB   | PHE | 165 | 22.954 | 40.684 | 8.377  | 0.00 | 0.00 | C   |
| ATOM | 2606 | CG   | PHE | 165 | 21.422 | 40.769 | 8.439  | 0.00 | 0.00 | C   |
| ATOM | 2607 | CD1  | PHE | 165 | 20.679 | 39.795 | 7.845  | 0.00 | 0.00 | C   |
| ATOM | 2608 | CD2  | PHE | 165 | 20.772 | 41.875 | 9.029  | 0.00 | 0.00 | C   |
| ATOM | 2609 | CE1  | PHE | 165 | 19.281 | 40.006 | 7.663  | 0.00 | 0.00 | C   |
| ATOM | 2610 | CE2  | PHE | 165 | 19.381 | 42.039 | 9.018  | 0.00 | 0.00 | C   |
| ATOM | 2611 | CZ   | PHE | 165 | 18.647 | 41.084 | 8.284  | 0.00 | 0.00 | C   |
| ATOM | 2612 | H    | PHE | 165 | 25.618 | 40.907 | 7.691  | 0.00 | 0.00 | H   |
| ATOM | 2613 | HA   | PHE | 165 | 23.036 | 41.149 | 6.290  | 0.00 | 0.00 | H   |
| ATOM | 2614 | HB2  | PHE | 165 | 23.271 | 39.642 | 8.417  | 0.00 | 0.00 | H   |
| ATOM | 2615 | HB3  | PHE | 165 | 23.377 | 41.201 | 9.240  | 0.00 | 0.00 | H   |
| ATOM | 2616 | HD1  | PHE | 165 | 21.160 | 38.995 | 7.301  | 0.00 | 0.00 | H   |
| ATOM | 2617 | HD2  | PHE | 165 | 21.343 | 42.642 | 9.532  | 0.00 | 0.00 | H   |
| ATOM | 2618 | HE1  | PHE | 165 | 18.675 | 39.186 | 7.306  | 0.00 | 0.00 | H   |
| ATOM | 2619 | HE2  | PHE | 165 | 18.962 | 42.919 | 9.481  | 0.00 | 0.00 | H   |
| ATOM | 2620 | HZ   | PHE | 165 | 17.573 | 41.088 | 8.395  | 0.00 | 0.00 | H   |
| ATOM | 2621 | N    | MET | 166 | 23.869 | 43.749 | 8.173  | 0.00 | 0.00 | N   |
| ATOM | 2622 | CA   | MET | 166 | 23.729 | 45.193 | 8.345  | 0.00 | 0.00 | C   |
| ATOM | 2623 | C    | MET | 166 | 24.074 | 46.016 | 7.097  | 0.00 | 0.00 | C   |
| ATOM | 2624 | O    | MET | 166 | 23.320 | 46.972 | 6.870  | 0.00 | 0.00 | O   |
| ATOM | 2625 | CB   | MET | 166 | 24.679 | 45.602 | 9.503  | 0.00 | 0.00 | C   |
| ATOM | 2626 | CG   | MET | 166 | 24.222 | 45.175 | 10.978 | 0.00 | 0.00 | C   |
| ATOM | 2627 | SD   | MET | 166 | 25.052 | 45.957 | 12.304 | 0.00 | 0.00 | S   |
| ATOM | 2628 | CE   | MET | 166 | 23.765 | 46.308 | 13.469 | 0.00 | 0.00 | C   |
| ATOM | 2629 | H    | MET | 166 | 24.434 | 43.212 | 8.816  | 0.00 | 0.00 | H   |
| ATOM | 2630 | HA   | MET | 166 | 22.723 | 45.407 | 8.706  | 0.00 | 0.00 | H   |
| ATOM | 2631 | HB2  | MET | 166 | 25.703 | 45.241 | 9.410  | 0.00 | 0.00 | H   |
| ATOM | 2632 | HB3  | MET | 166 | 24.532 | 46.683 | 9.491  | 0.00 | 0.00 | H   |
| ATOM | 2633 | HG2  | MET | 166 | 23.243 | 45.644 | 11.072 | 0.00 | 0.00 | H   |
| ATOM | 2634 | HG3  | MET | 166 | 24.223 | 44.096 | 11.132 | 0.00 | 0.00 | H   |
| ATOM | 2635 | HE1  | MET | 166 | 22.857 | 46.709 | 13.020 | 0.00 | 0.00 | H   |
| ATOM | 2636 | HE2  | MET | 166 | 23.560 | 45.463 | 14.128 | 0.00 | 0.00 | H   |
| ATOM | 2637 | HE3  | MET | 166 | 24.165 | 47.064 | 14.144 | 0.00 | 0.00 | H   |
| ATOM | 2638 | N    | LEU | 167 | 25.059 | 45.617 | 6.250  | 0.00 | 0.00 | N   |
| ATOM | 2639 | CA   | LEU | 167 | 25.287 | 46.198 | 4.919  | 0.00 | 0.00 | C   |
| ATOM | 2640 | C    | LEU | 167 | 24.030 | 45.900 | 4.041  | 0.00 | 0.00 | C   |
| ATOM | 2641 | O    | LEU | 167 | 23.392 | 46.860 | 3.452  | 0.00 | 0.00 | O   |
| ATOM | 2642 | CB   | LEU | 167 | 26.689 | 45.652 | 4.352  | 0.00 | 0.00 | C   |

|      |      |      |     |     |        |        |        |      |      |     |
|------|------|------|-----|-----|--------|--------|--------|------|------|-----|
| ATOM | 2643 | CG   | LEU | 167 | 27.017 | 46.249 | 2.950  | 0.00 | 0.00 | C   |
| ATOM | 2644 | CD1  | LEU | 167 | 27.318 | 47.714 | 3.045  | 0.00 | 0.00 | C   |
| ATOM | 2645 | CD2  | LEU | 167 | 28.251 | 45.559 | 2.275  | 0.00 | 0.00 | C   |
| ATOM | 2646 | H    | LEU | 167 | 25.611 | 44.792 | 6.431  | 0.00 | 0.00 | H   |
| ATOM | 2647 | HA   | LEU | 167 | 25.382 | 47.280 | 5.015  | 0.00 | 0.00 | H   |
| ATOM | 2648 | HB2  | LEU | 167 | 27.537 | 45.765 | 5.027  | 0.00 | 0.00 | H   |
| ATOM | 2649 | HB3  | LEU | 167 | 26.619 | 44.581 | 4.161  | 0.00 | 0.00 | H   |
| ATOM | 2650 | HG   | LEU | 167 | 26.132 | 46.169 | 2.318  | 0.00 | 0.00 | H   |
| ATOM | 2651 | HD11 | LEU | 167 | 26.438 | 48.123 | 3.542  | 0.00 | 0.00 | H   |
| ATOM | 2652 | HD12 | LEU | 167 | 28.182 | 47.917 | 3.676  | 0.00 | 0.00 | H   |
| ATOM | 2653 | HD13 | LEU | 167 | 27.420 | 48.151 | 2.052  | 0.00 | 0.00 | H   |
| ATOM | 2654 | HD21 | LEU | 167 | 29.162 | 45.613 | 2.872  | 0.00 | 0.00 | H   |
| ATOM | 2655 | HD22 | LEU | 167 | 28.020 | 44.507 | 2.110  | 0.00 | 0.00 | H   |
| ATOM | 2656 | HD23 | LEU | 167 | 28.522 | 45.887 | 1.272  | 0.00 | 0.00 | H   |
| ATOM | 2657 | N    | HIP | 168 | 23.637 | 44.654 | 3.841  | 0.00 | 0.00 | N   |
| ATOM | 2658 | CA   | HIP | 168 | 22.651 | 44.213 | 2.810  | 0.00 | 0.00 | C   |
| ATOM | 2659 | C    | HIP | 168 | 21.188 | 44.275 | 3.225  | 0.00 | 0.00 | C   |
| ATOM | 2660 | O    | HIP | 168 | 20.376 | 43.937 | 2.408  | 0.00 | 0.00 | O   |
| ATOM | 2661 | CB   | HIP | 168 | 23.141 | 42.788 | 2.309  | 0.00 | 0.00 | C   |
| ATOM | 2662 | CG   | HIP | 168 | 24.502 | 42.692 | 1.709  | 0.00 | 0.00 | C   |
| ATOM | 2663 | CD2  | HIP | 168 | 24.962 | 43.287 | 0.515  | 0.00 | 0.00 | C   |
| ATOM | 2664 | ND1  | HIP | 168 | 25.501 | 41.760 | 2.070  | 0.00 | 0.00 | N1+ |
| ATOM | 2665 | CE1  | HIP | 168 | 26.493 | 41.896 | 1.217  | 0.00 | 0.00 | C   |
| ATOM | 2666 | NE2  | HIP | 168 | 26.169 | 42.785 | 0.211  | 0.00 | 0.00 | N   |
| ATOM | 2667 | H    | HIP | 168 | 23.996 | 43.988 | 4.510  | 0.00 | 0.00 | H   |
| ATOM | 2668 | HA   | HIP | 168 | 22.681 | 44.812 | 1.901  | 0.00 | 0.00 | H   |
| ATOM | 2669 | HB2  | HIP | 168 | 23.192 | 42.127 | 3.175  | 0.00 | 0.00 | H   |
| ATOM | 2670 | HB3  | HIP | 168 | 22.422 | 42.459 | 1.558  | 0.00 | 0.00 | H   |
| ATOM | 2671 | HD1  | HIP | 168 | 25.509 | 41.090 | 2.825  | 0.00 | 0.00 | H   |
| ATOM | 2672 | HD2  | HIP | 168 | 24.419 | 43.965 | -0.127 | 0.00 | 0.00 | H   |
| ATOM | 2673 | HE1  | HIP | 168 | 27.389 | 41.305 | 1.092  | 0.00 | 0.00 | H   |
| ATOM | 2674 | HE2  | HIP | 168 | 26.709 | 42.850 | -0.639 | 0.00 | 0.00 | H   |
| ATOM | 2675 | N    | HIP | 169 | 20.933 | 44.918 | 4.397  | 0.00 | 0.00 | N   |
| ATOM | 2676 | CA   | HIP | 169 | 19.643 | 45.489 | 4.735  | 0.00 | 0.00 | C   |
| ATOM | 2677 | C    | HIP | 169 | 19.683 | 46.917 | 5.201  | 0.00 | 0.00 | C   |
| ATOM | 2678 | O    | HIP | 169 | 19.171 | 47.177 | 6.250  | 0.00 | 0.00 | O   |
| ATOM | 2679 | CB   | HIP | 169 | 18.958 | 44.582 | 5.817  | 0.00 | 0.00 | C   |
| ATOM | 2680 | CG   | HIP | 169 | 18.639 | 43.123 | 5.383  | 0.00 | 0.00 | C   |
| ATOM | 2681 | CD2  | HIP | 169 | 19.537 | 42.144 | 5.267  | 0.00 | 0.00 | C   |
| ATOM | 2682 | ND1  | HIP | 169 | 17.555 | 42.708 | 4.557  | 0.00 | 0.00 | N1+ |
| ATOM | 2683 | CE1  | HIP | 169 | 17.810 | 41.499 | 4.025  | 0.00 | 0.00 | C   |
| ATOM | 2684 | NE2  | HIP | 169 | 19.023 | 41.123 | 4.469  | 0.00 | 0.00 | N   |
| ATOM | 2685 | H    | HIP | 169 | 21.719 | 44.990 | 5.028  | 0.00 | 0.00 | H   |
| ATOM | 2686 | HA   | HIP | 169 | 18.968 | 45.505 | 3.880  | 0.00 | 0.00 | H   |
| ATOM | 2687 | HB2  | HIP | 169 | 19.472 | 44.572 | 6.779  | 0.00 | 0.00 | H   |
| ATOM | 2688 | HB3  | HIP | 169 | 17.943 | 44.944 | 5.980  | 0.00 | 0.00 | H   |
| ATOM | 2689 | HD1  | HIP | 169 | 16.712 | 43.233 | 4.373  | 0.00 | 0.00 | H   |
| ATOM | 2690 | HD2  | HIP | 169 | 20.478 | 42.249 | 5.788  | 0.00 | 0.00 | H   |
| ATOM | 2691 | HE1  | HIP | 169 | 17.151 | 40.923 | 3.392  | 0.00 | 0.00 | H   |
| ATOM | 2692 | HE2  | HIP | 169 | 19.595 | 40.364 | 4.128  | 0.00 | 0.00 | H   |
| ATOM | 2693 | N    | CYS | 170 | 20.288 | 47.792 | 4.397  | 0.00 | 0.00 | N   |
| ATOM | 2694 | CA   | CYS | 170 | 20.383 | 49.284 | 4.614  | 0.00 | 0.00 | C   |
| ATOM | 2695 | C    | CYS | 170 | 21.093 | 49.768 | 5.894  | 0.00 | 0.00 | C   |
| ATOM | 2696 | O    | CYS | 170 | 21.378 | 50.916 | 5.999  | 0.00 | 0.00 | O   |
| ATOM | 2697 | CB   | CYS | 170 | 19.039 | 49.932 | 4.416  | 0.00 | 0.00 | C   |
| ATOM | 2698 | SG   | CYS | 170 | 18.562 | 49.781 | 2.630  | 0.00 | 0.00 | S   |
| ATOM | 2699 | H    | CYS | 170 | 20.684 | 47.407 | 3.551  | 0.00 | 0.00 | H   |
| ATOM | 2700 | HA   | CYS | 170 | 21.040 | 49.664 | 3.832  | 0.00 | 0.00 | H   |
| ATOM | 2701 | HB2  | CYS | 170 | 18.218 | 49.608 | 5.055  | 0.00 | 0.00 | H   |
| ATOM | 2702 | HB3  | CYS | 170 | 19.254 | 50.988 | 4.578  | 0.00 | 0.00 | H   |
| ATOM | 2703 | HG   | CYS | 170 | 17.913 | 50.942 | 2.759  | 0.00 | 0.00 | H   |
| ATOM | 2704 | N    | ILE | 171 | 21.334 | 49.016 | 6.975  | 0.00 | 0.00 | N   |
| ATOM | 2705 | CA   | ILE | 171 | 21.700 | 49.506 | 8.378  | 0.00 | 0.00 | C   |
| ATOM | 2706 | C    | ILE | 171 | 23.068 | 50.267 | 8.319  | 0.00 | 0.00 | C   |
| ATOM | 2707 | O    | ILE | 171 | 23.151 | 51.293 | 9.040  | 0.00 | 0.00 | O   |
| ATOM | 2708 | CB   | ILE | 171 | 21.776 | 48.304 | 9.406  | 0.00 | 0.00 | C   |
| ATOM | 2709 | CG1  | ILE | 171 | 20.507 | 47.443 | 9.334  | 0.00 | 0.00 | C   |
| ATOM | 2710 | CG2  | ILE | 171 | 22.007 | 48.867 | 10.862 | 0.00 | 0.00 | C   |
| ATOM | 2711 | CD1  | ILE | 171 | 20.393 | 46.322 | 10.345 | 0.00 | 0.00 | C   |
| ATOM | 2712 | H    | ILE | 171 | 21.131 | 48.037 | 6.835  | 0.00 | 0.00 | H   |
| ATOM | 2713 | HA   | ILE | 171 | 20.985 | 50.235 | 8.759  | 0.00 | 0.00 | H   |
| ATOM | 2714 | HB   | ILE | 171 | 22.584 | 47.644 | 9.087  | 0.00 | 0.00 | H   |
| ATOM | 2715 | HG12 | ILE | 171 | 19.644 | 48.082 | 9.524  | 0.00 | 0.00 | H   |
| ATOM | 2716 | HG13 | ILE | 171 | 20.449 | 46.967 | 8.355  | 0.00 | 0.00 | H   |
| ATOM | 2717 | HG21 | ILE | 171 | 21.118 | 49.372 | 11.241 | 0.00 | 0.00 | H   |
| ATOM | 2718 | HG22 | ILE | 171 | 22.121 | 47.965 | 11.464 | 0.00 | 0.00 | H   |
| ATOM | 2719 | HG23 | ILE | 171 | 22.934 | 49.436 | 10.811 | 0.00 | 0.00 | H   |
| ATOM | 2720 | HD11 | ILE | 171 | 19.543 | 45.713 | 10.036 | 0.00 | 0.00 | H   |
| ATOM | 2721 | HD12 | ILE | 171 | 21.267 | 45.672 | 10.351 | 0.00 | 0.00 | H   |
| ATOM | 2722 | HD13 | ILE | 171 | 20.277 | 46.661 | 11.374 | 0.00 | 0.00 | H   |
| ATOM | 2723 | N    | ALA | 172 | 23.980 | 49.830 | 7.476  | 0.00 | 0.00 | N   |
| ATOM | 2724 | CA   | ALA | 172 | 25.270 | 50.491 | 7.363  | 0.00 | 0.00 | C   |
| ATOM | 2725 | C    | ALA | 172 | 25.129 | 51.921 | 6.790  | 0.00 | 0.00 | C   |
| ATOM | 2726 | O    | ALA | 172 | 25.920 | 52.839 | 7.140  | 0.00 | 0.00 | O   |
| ATOM | 2727 | CB   | ALA | 172 | 26.231 | 49.589 | 6.601  | 0.00 | 0.00 | C   |
| ATOM | 2728 | H    | ALA | 172 | 23.828 | 49.021 | 6.890  | 0.00 | 0.00 | H   |
| ATOM | 2729 | HA   | ALA | 172 | 25.617 | 50.549 | 8.394  | 0.00 | 0.00 | H   |
| ATOM | 2730 | HB1  | ALA | 172 | 25.919 | 49.378 | 5.577  | 0.00 | 0.00 | H   |
| ATOM | 2731 | HB2  | ALA | 172 | 27.189 | 50.104 | 6.525  | 0.00 | 0.00 | H   |
| ATOM | 2732 | HB3  | ALA | 172 | 26.376 | 48.674 | 7.173  | 0.00 | 0.00 | H   |
| ATOM | 2733 | N    | ARG | 173 | 24.112 | 52.153 | 5.823  | 0.00 | 0.00 | N   |
| ATOM | 2734 | CA   | ARG | 173 | 23.838 | 53.487 | 5.218  | 0.00 | 0.00 | C   |
| ATOM | 2735 | C    | ARG | 173 | 23.198 | 54.422 | 6.210  | 0.00 | 0.00 | C   |
| ATOM | 2736 | O    | ARG | 173 | 23.427 | 55.631 | 6.107  | 0.00 | 0.00 | O   |
| ATOM | 2737 | CB   | ARG | 173 | 22.979 | 53.351 | 3.932  | 0.00 | 0.00 | C   |
| ATOM | 2738 | CG   | ARG | 173 | 22.682 | 54.637 | 3.189  | 0.00 | 0.00 | C   |
| ATOM | 2739 | CD   | ARG | 173 | 21.632 | 54.286 | 2.142  | 0.00 | 0.00 | C   |
| ATOM | 2740 | NE   | ARG | 173 | 22.127 | 53.233 | 1.194  | 0.00 | 0.00 | N   |
| ATOM | 2741 | CZ   | ARG | 173 | 21.360 | 52.350 | 0.556  | 0.00 | 0.00 | C   |
| ATOM | 2742 | NH1  | ARG | 173 | 20.056 | 52.599 | 0.521  | 0.00 | 0.00 | N1+ |
| ATOM | 2743 | NH2  | ARG | 173 | 21.782 | 51.269 | 0.084  | 0.00 | 0.00 | N   |
| ATOM | 2744 | H    | ARG | 173 | 23.653 | 51.310 | 5.508  | 0.00 | 0.00 | H   |
| ATOM | 2745 | HA   | ARG | 173 | 24.818 | 53.894 | 4.973  | 0.00 | 0.00 | H   |
| ATOM | 2746 | HB2  | ARG | 173 | 23.429 | 52.596 | 3.287  | 0.00 | 0.00 | H   |
| ATOM | 2747 | HB3  | ARG | 173 | 22.095 | 52.754 | 4.155  | 0.00 | 0.00 | H   |

|      |      |      |     |     |        |        |        |      |      |     |
|------|------|------|-----|-----|--------|--------|--------|------|------|-----|
| ATOM | 2748 | HG2  | ARG | 173 | 22.268 | 55.311 | 3.940  | 0.00 | 0.00 | H   |
| ATOM | 2749 | HG3  | ARG | 173 | 23.637 | 55.020 | 2.830  | 0.00 | 0.00 | H   |
| ATOM | 2750 | HD2  | ARG | 173 | 20.846 | 53.847 | 2.757  | 0.00 | 0.00 | H   |
| ATOM | 2751 | HD3  | ARG | 173 | 21.380 | 55.127 | 1.496  | 0.00 | 0.00 | H   |
| ATOM | 2752 | HE   | ARG | 173 | 23.109 | 53.095 | 1.003  | 0.00 | 0.00 | H   |
| ATOM | 2753 | HH11 | ARG | 173 | 19.820 | 53.569 | 0.677  | 0.00 | 0.00 | H   |
| ATOM | 2754 | HH12 | ARG | 173 | 19.440 | 52.086 | -0.092 | 0.00 | 0.00 | H   |
| ATOM | 2755 | HH21 | ARG | 173 | 22.713 | 50.994 | 0.360  | 0.00 | 0.00 | H   |
| ATOM | 2756 | HH22 | ARG | 173 | 21.110 | 50.529 | -0.061 | 0.00 | 0.00 | H   |
| ATOM | 2757 | N    | TRP | 174 | 22.309 | 53.918 | 7.088  | 0.00 | 0.00 | N   |
| ATOM | 2758 | CA   | TRP | 174 | 21.692 | 54.843 | 8.120  | 0.00 | 0.00 | C   |
| ATOM | 2759 | C    | TRP | 174 | 22.736 | 55.317 | 9.046  | 0.00 | 0.00 | C   |
| ATOM | 2760 | O    | TRP | 174 | 22.763 | 56.490 | 9.515  | 0.00 | 0.00 | O   |
| ATOM | 2761 | CB   | TRP | 174 | 20.460 | 54.145 | 8.748  | 0.00 | 0.00 | C   |
| ATOM | 2762 | CG   | TRP | 174 | 19.697 | 54.934 | 9.753  | 0.00 | 0.00 | C   |
| ATOM | 2763 | CD1  | TRP | 174 | 18.825 | 55.972 | 9.532  | 0.00 | 0.00 | C   |
| ATOM | 2764 | CD2  | TRP | 174 | 19.782 | 54.777 | 11.177 | 0.00 | 0.00 | C   |
| ATOM | 2765 | CE2  | TRP | 174 | 18.862 | 55.668 | 11.791 | 0.00 | 0.00 | C   |
| ATOM | 2766 | CE3  | TRP | 174 | 20.572 | 54.021 | 12.166 | 0.00 | 0.00 | C   |
| ATOM | 2767 | NE1  | TRP | 174 | 18.374 | 56.430 | 10.728 | 0.00 | 0.00 | N   |
| ATOM | 2768 | CZ2  | TRP | 174 | 18.695 | 55.828 | 13.202 | 0.00 | 0.00 | C   |
| ATOM | 2769 | CZ3  | TRP | 174 | 20.416 | 54.236 | 13.525 | 0.00 | 0.00 | C   |
| ATOM | 2770 | CH2  | TRP | 174 | 19.536 | 55.131 | 14.038 | 0.00 | 0.00 | C   |
| ATOM | 2771 | H    | TRP | 174 | 22.025 | 52.959 | 6.948  | 0.00 | 0.00 | H   |
| ATOM | 2772 | HA   | TRP | 174 | 21.327 | 55.770 | 7.677  | 0.00 | 0.00 | H   |
| ATOM | 2773 | HB2  | TRP | 174 | 19.731 | 53.777 | 8.026  | 0.00 | 0.00 | H   |
| ATOM | 2774 | HB3  | TRP | 174 | 20.855 | 53.262 | 9.250  | 0.00 | 0.00 | H   |
| ATOM | 2775 | HD1  | TRP | 174 | 18.632 | 56.335 | 8.533  | 0.00 | 0.00 | H   |
| ATOM | 2776 | HE1  | TRP | 174 | 17.719 | 57.171 | 10.935 | 0.00 | 0.00 | H   |
| ATOM | 2777 | HE3  | TRP | 174 | 21.264 | 53.302 | 11.754 | 0.00 | 0.00 | H   |
| ATOM | 2778 | HZ2  | TRP | 174 | 18.025 | 56.594 | 13.564 | 0.00 | 0.00 | H   |
| ATOM | 2779 | HZ3  | TRP | 174 | 21.086 | 53.712 | 14.191 | 0.00 | 0.00 | H   |
| ATOM | 2780 | HH2  | TRP | 174 | 19.708 | 55.386 | 15.073 | 0.00 | 0.00 | H   |
| ATOM | 2781 | N    | ILE | 175 | 23.698 | 54.453 | 9.383  | 0.00 | 0.00 | N   |
| ATOM | 2782 | CA   | ILE | 175 | 24.825 | 54.785 | 10.223 | 0.00 | 0.00 | C   |
| ATOM | 2783 | C    | ILE | 175 | 25.787 | 55.687 | 9.397  | 0.00 | 0.00 | C   |
| ATOM | 2784 | O    | ILE | 175 | 26.313 | 56.594 | 9.971  | 0.00 | 0.00 | O   |
| ATOM | 2785 | CB   | ILE | 175 | 25.407 | 53.494 | 10.711 | 0.00 | 0.00 | C   |
| ATOM | 2786 | CG1  | ILE | 175 | 24.542 | 52.812 | 11.843 | 0.00 | 0.00 | C   |
| ATOM | 2787 | CG2  | ILE | 175 | 26.786 | 53.805 | 11.347 | 0.00 | 0.00 | C   |
| ATOM | 2788 | CD1  | ILE | 175 | 24.746 | 51.284 | 12.120 | 0.00 | 0.00 | C   |
| ATOM | 2789 | H    | ILE | 175 | 23.628 | 53.559 | 8.919  | 0.00 | 0.00 | H   |
| ATOM | 2790 | HA   | ILE | 175 | 24.375 | 55.261 | 11.095 | 0.00 | 0.00 | H   |
| ATOM | 2791 | HB   | ILE | 175 | 25.476 | 52.808 | 9.868  | 0.00 | 0.00 | H   |
| ATOM | 2792 | HG12 | ILE | 175 | 24.636 | 53.453 | 12.720 | 0.00 | 0.00 | H   |
| ATOM | 2793 | HG13 | ILE | 175 | 23.510 | 52.863 | 11.495 | 0.00 | 0.00 | H   |
| ATOM | 2794 | HG21 | ILE | 175 | 26.792 | 54.713 | 11.950 | 0.00 | 0.00 | H   |
| ATOM | 2795 | HG22 | ILE | 175 | 27.031 | 53.011 | 12.051 | 0.00 | 0.00 | H   |
| ATOM | 2796 | HG23 | ILE | 175 | 27.612 | 53.877 | 10.641 | 0.00 | 0.00 | H   |
| ATOM | 2797 | HD11 | ILE | 175 | 23.905 | 51.002 | 12.753 | 0.00 | 0.00 | H   |
| ATOM | 2798 | HD12 | ILE | 175 | 24.629 | 50.758 | 11.173 | 0.00 | 0.00 | H   |
| ATOM | 2799 | HD13 | ILE | 175 | 25.720 | 51.139 | 12.587 | 0.00 | 0.00 | H   |
| ATOM | 2800 | N    | ALA | 176 | 26.014 | 55.400 | 8.154  | 0.00 | 0.00 | N   |
| ATOM | 2801 | CA   | ALA | 176 | 26.929 | 56.215 | 7.266  | 0.00 | 0.00 | C   |
| ATOM | 2802 | C    | ALA | 176 | 26.480 | 57.580 | 7.069  | 0.00 | 0.00 | C   |
| ATOM | 2803 | O    | ALA | 176 | 27.172 | 58.492 | 7.351  | 0.00 | 0.00 | O   |
| ATOM | 2804 | CB   | ALA | 176 | 27.040 | 55.542 | 5.912  | 0.00 | 0.00 | C   |
| ATOM | 2805 | H    | ALA | 176 | 25.673 | 54.514 | 7.810  | 0.00 | 0.00 | H   |
| ATOM | 2806 | HA   | ALA | 176 | 27.951 | 56.160 | 7.642  | 0.00 | 0.00 | H   |
| ATOM | 2807 | HB1  | ALA | 176 | 27.796 | 56.089 | 5.349  | 0.00 | 0.00 | H   |
| ATOM | 2808 | HB2  | ALA | 176 | 27.310 | 54.488 | 5.985  | 0.00 | 0.00 | H   |
| ATOM | 2809 | HB3  | ALA | 176 | 26.045 | 55.521 | 5.470  | 0.00 | 0.00 | H   |
| ATOM | 2810 | N    | GLN | 177 | 25.187 | 57.814 | 6.815  | 0.00 | 0.00 | N   |
| ATOM | 2811 | CA   | GLN | 177 | 24.492 | 59.158 | 6.857  | 0.00 | 0.00 | C   |
| ATOM | 2812 | C    | GLN | 177 | 24.357 | 59.801 | 8.222  | 0.00 | 0.00 | C   |
| ATOM | 2813 | O    | GLN | 177 | 23.785 | 60.886 | 8.339  | 0.00 | 0.00 | O   |
| ATOM | 2814 | CB   | GLN | 177 | 23.216 | 59.010 | 6.056  | 0.00 | 0.00 | C   |
| ATOM | 2815 | CG   | GLN | 177 | 23.327 | 58.801 | 4.527  | 0.00 | 0.00 | C   |
| ATOM | 2816 | CD   | GLN | 177 | 22.008 | 58.831 | 3.728  | 0.00 | 0.00 | C   |
| ATOM | 2817 | NE2  | GLN | 177 | 22.079 | 58.594 | 2.446  | 0.00 | 0.00 | N   |
| ATOM | 2818 | OE1  | GLN | 177 | 20.935 | 59.192 | 4.166  | 0.00 | 0.00 | O   |
| ATOM | 2819 | H    | GLN | 177 | 24.552 | 57.059 | 6.603  | 0.00 | 0.00 | H   |
| ATOM | 2820 | HA   | GLN | 177 | 25.109 | 59.865 | 6.301  | 0.00 | 0.00 | H   |
| ATOM | 2821 | HB2  | GLN | 177 | 22.841 | 58.131 | 6.582  | 0.00 | 0.00 | H   |
| ATOM | 2822 | HB3  | GLN | 177 | 22.547 | 59.848 | 6.246  | 0.00 | 0.00 | H   |
| ATOM | 2823 | HG2  | GLN | 177 | 23.928 | 59.649 | 4.199  | 0.00 | 0.00 | H   |
| ATOM | 2824 | HG3  | GLN | 177 | 23.831 | 57.878 | 4.236  | 0.00 | 0.00 | H   |
| ATOM | 2825 | HE21 | GLN | 177 | 21.227 | 58.566 | 1.904  | 0.00 | 0.00 | H   |
| ATOM | 2826 | HE22 | GLN | 177 | 22.993 | 58.577 | 2.017  | 0.00 | 0.00 | H   |
| ATOM | 2827 | N    | ARG | 178 | 24.917 | 59.192 | 9.268  | 0.00 | 0.00 | N   |
| ATOM | 2828 | CA   | ARG | 178 | 25.164 | 59.667 | 10.608 | 0.00 | 0.00 | C   |
| ATOM | 2829 | C    | ARG | 178 | 26.701 | 59.809 | 10.938 | 0.00 | 0.00 | C   |
| ATOM | 2830 | O    | ARG | 178 | 27.124 | 59.880 | 12.098 | 0.00 | 0.00 | O   |
| ATOM | 2831 | CB   | ARG | 178 | 24.347 | 58.900 | 11.591 | 0.00 | 0.00 | C   |
| ATOM | 2832 | CG   | ARG | 178 | 22.827 | 59.059 | 11.528 | 0.00 | 0.00 | C   |
| ATOM | 2833 | CD   | ARG | 178 | 21.931 | 58.026 | 12.264 | 0.00 | 0.00 | C   |
| ATOM | 2834 | NE   | ARG | 178 | 20.599 | 58.537 | 12.529 | 0.00 | 0.00 | N   |
| ATOM | 2835 | CZ   | ARG | 178 | 20.269 | 58.899 | 13.786 | 0.00 | 0.00 | C   |
| ATOM | 2836 | NH1  | ARG | 178 | 19.087 | 59.359 | 13.990 | 0.00 | 0.00 | N1+ |
| ATOM | 2837 | NH2  | ARG | 178 | 20.988 | 59.011 | 14.837 | 0.00 | 0.00 | N   |
| ATOM | 2838 | H    | ARG | 178 | 25.414 | 58.324 | 9.124  | 0.00 | 0.00 | H   |
| ATOM | 2839 | HA   | ARG | 178 | 24.745 | 60.674 | 10.607 | 0.00 | 0.00 | H   |
| ATOM | 2840 | HB2  | ARG | 178 | 24.499 | 57.840 | 11.393 | 0.00 | 0.00 | H   |
| ATOM | 2841 | HB3  | ARG | 178 | 24.677 | 59.142 | 12.601 | 0.00 | 0.00 | H   |
| ATOM | 2842 | HG2  | ARG | 178 | 22.591 | 60.084 | 11.812 | 0.00 | 0.00 | H   |
| ATOM | 2843 | HG3  | ARG | 178 | 22.489 | 59.085 | 10.491 | 0.00 | 0.00 | H   |
| ATOM | 2844 | HD2  | ARG | 178 | 21.682 | 57.175 | 11.630 | 0.00 | 0.00 | H   |
| ATOM | 2845 | HD3  | ARG | 178 | 22.330 | 57.620 | 13.194 | 0.00 | 0.00 | H   |
| ATOM | 2846 | HE   | ARG | 178 | 19.991 | 58.704 | 11.740 | 0.00 | 0.00 | H   |
| ATOM | 2847 | HH11 | ARG | 178 | 18.431 | 59.195 | 13.241 | 0.00 | 0.00 | H   |
| ATOM | 2848 | HH12 | ARG | 178 | 18.764 | 59.915 | 14.769 | 0.00 | 0.00 | H   |
| ATOM | 2849 | HH21 | ARG | 178 | 21.985 | 58.933 | 14.702 | 0.00 | 0.00 | H   |
| ATOM | 2850 | HH22 | ARG | 178 | 20.486 | 59.380 | 15.632 | 0.00 | 0.00 | H   |
| ATOM | 2851 | N    | GLY | 179 | 27.545 | 59.713 | 9.910  | 0.00 | 0.00 | N   |
| ATOM | 2852 | CA   | GLY | 179 | 29.018 | 59.813 | 9.984  | 0.00 | 0.00 | C   |



|      |      |      |     |     |        |        |        |      |      |   |
|------|------|------|-----|-----|--------|--------|--------|------|------|---|
| ATOM | 2853 | C    | GLY | 179 | 29.720 | 58.487 | 10.333 | 0.00 | 0.00 | C |
| ATOM | 2854 | O    | GLY | 179 | 30.830 | 58.556 | 10.923 | 0.00 | 0.00 | O |
| ATOM | 2855 | H    | GLY | 179 | 27.078 | 59.563 | 9.027  | 0.00 | 0.00 | H |
| ATOM | 2856 | HA2  | GLY | 179 | 29.452 | 60.132 | 9.036  | 0.00 | 0.00 | H |
| ATOM | 2857 | HA3  | GLY | 179 | 29.326 | 60.619 | 10.650 | 0.00 | 0.00 | H |
| ATOM | 2858 | N    | GLY | 180 | 28.998 | 57.348 | 10.164 | 0.00 | 0.00 | N |
| ATOM | 2859 | CA   | GLY | 180 | 29.575 | 56.096 | 10.546 | 0.00 | 0.00 | C |
| ATOM | 2860 | C    | GLY | 180 | 30.140 | 55.961 | 11.934 | 0.00 | 0.00 | C |
| ATOM | 2861 | O    | GLY | 180 | 29.908 | 56.846 | 12.757 | 0.00 | 0.00 | O |
| ATOM | 2862 | H    | GLY | 180 | 28.059 | 57.387 | 9.793  | 0.00 | 0.00 | H |
| ATOM | 2863 | HA2  | GLY | 180 | 28.862 | 55.286 | 10.400 | 0.00 | 0.00 | H |
| ATOM | 2864 | HA3  | GLY | 180 | 30.437 | 55.941 | 9.896  | 0.00 | 0.00 | H |
| ATOM | 2865 | N    | TRP | 181 | 30.717 | 54.784 | 12.263 | 0.00 | 0.00 | N |
| ATOM | 2866 | CA   | TRP | 181 | 30.934 | 54.426 | 13.697 | 0.00 | 0.00 | C |
| ATOM | 2867 | C    | TRP | 181 | 31.818 | 55.434 | 14.474 | 0.00 | 0.00 | C |
| ATOM | 2868 | O    | TRP | 181 | 31.828 | 55.480 | 15.665 | 0.00 | 0.00 | O |
| ATOM | 2869 | CB   | TRP | 181 | 31.490 | 53.044 | 13.738 | 0.00 | 0.00 | C |
| ATOM | 2870 | CG   | TRP | 181 | 30.480 | 51.930 | 13.432 | 0.00 | 0.00 | C |
| ATOM | 2871 | CD1  | TRP | 181 | 30.539 | 51.008 | 12.404 | 0.00 | 0.00 | C |
| ATOM | 2872 | CD2  | TRP | 181 | 29.253 | 51.662 | 14.185 | 0.00 | 0.00 | C |
| ATOM | 2873 | CE2  | TRP | 181 | 28.729 | 50.458 | 13.537 | 0.00 | 0.00 | C |
| ATOM | 2874 | CE3  | TRP | 181 | 28.617 | 52.139 | 15.319 | 0.00 | 0.00 | C |
| ATOM | 2875 | NE1  | TRP | 181 | 29.494 | 50.147 | 12.424 | 0.00 | 0.00 | N |
| ATOM | 2876 | CZ2  | TRP | 181 | 27.623 | 49.789 | 14.146 | 0.00 | 0.00 | C |
| ATOM | 2877 | CZ3  | TRP | 181 | 27.471 | 51.460 | 15.830 | 0.00 | 0.00 | C |
| ATOM | 2878 | CH2  | TRP | 181 | 26.939 | 50.286 | 15.278 | 0.00 | 0.00 | C |
| ATOM | 2879 | H    | TRP | 181 | 31.038 | 54.176 | 11.523 | 0.00 | 0.00 | H |
| ATOM | 2880 | HA   | TRP | 181 | 29.998 | 54.326 | 14.246 | 0.00 | 0.00 | H |
| ATOM | 2881 | HB2  | TRP | 181 | 32.182 | 52.963 | 12.900 | 0.00 | 0.00 | H |
| ATOM | 2882 | HB3  | TRP | 181 | 31.901 | 52.818 | 14.723 | 0.00 | 0.00 | H |
| ATOM | 2883 | HD1  | TRP | 181 | 31.350 | 50.964 | 11.690 | 0.00 | 0.00 | H |
| ATOM | 2884 | HE1  | TRP | 181 | 29.255 | 49.463 | 11.721 | 0.00 | 0.00 | H |
| ATOM | 2885 | HE3  | TRP | 181 | 29.069 | 52.913 | 15.922 | 0.00 | 0.00 | H |
| ATOM | 2886 | HZ2  | TRP | 181 | 27.212 | 48.879 | 13.736 | 0.00 | 0.00 | H |
| ATOM | 2887 | HZ3  | TRP | 181 | 27.114 | 51.812 | 16.787 | 0.00 | 0.00 | H |
| ATOM | 2888 | HH2  | TRP | 181 | 26.055 | 49.830 | 15.699 | 0.00 | 0.00 | H |
| ATOM | 2889 | N    | VAL | 182 | 32.543 | 56.290 | 13.761 | 0.00 | 0.00 | N |
| ATOM | 2890 | CA   | VAL | 182 | 33.487 | 57.318 | 14.307 | 0.00 | 0.00 | C |
| ATOM | 2891 | C    | VAL | 182 | 32.910 | 58.671 | 14.920 | 0.00 | 0.00 | C |
| ATOM | 2892 | O    | VAL | 182 | 33.614 | 59.537 | 15.399 | 0.00 | 0.00 | O |
| ATOM | 2893 | CB   | VAL | 182 | 34.547 | 57.616 | 13.266 | 0.00 | 0.00 | C |
| ATOM | 2894 | CG1  | VAL | 182 | 34.189 | 58.713 | 12.262 | 0.00 | 0.00 | C |
| ATOM | 2895 | CG2  | VAL | 182 | 35.873 | 58.084 | 13.849 | 0.00 | 0.00 | C |
| ATOM | 2896 | H    | VAL | 182 | 32.575 | 56.033 | 12.785 | 0.00 | 0.00 | H |
| ATOM | 2897 | HA   | VAL | 182 | 33.971 | 56.798 | 15.134 | 0.00 | 0.00 | H |
| ATOM | 2898 | HB   | VAL | 182 | 34.786 | 56.758 | 12.638 | 0.00 | 0.00 | H |
| ATOM | 2899 | HG11 | VAL | 182 | 34.451 | 59.649 | 12.758 | 0.00 | 0.00 | H |
| ATOM | 2900 | HG12 | VAL | 182 | 33.129 | 58.705 | 12.013 | 0.00 | 0.00 | H |
| ATOM | 2901 | HG13 | VAL | 182 | 34.650 | 58.544 | 11.289 | 0.00 | 0.00 | H |
| ATOM | 2902 | HG21 | VAL | 182 | 36.717 | 58.070 | 13.160 | 0.00 | 0.00 | H |
| ATOM | 2903 | HG22 | VAL | 182 | 36.214 | 57.369 | 14.598 | 0.00 | 0.00 | H |
| ATOM | 2904 | HG23 | VAL | 182 | 35.810 | 59.057 | 14.335 | 0.00 | 0.00 | H |
| ATOM | 2905 | N    | ALA | 183 | 31.615 | 58.952 | 14.651 | 0.00 | 0.00 | N |
| ATOM | 2906 | CA   | ALA | 183 | 30.851 | 59.918 | 15.447 | 0.00 | 0.00 | C |
| ATOM | 2907 | C    | ALA | 183 | 29.425 | 59.475 | 15.846 | 0.00 | 0.00 | C |
| ATOM | 2908 | O    | ALA | 183 | 28.809 | 60.011 | 16.707 | 0.00 | 0.00 | O |
| ATOM | 2909 | CB   | ALA | 183 | 30.765 | 61.224 | 14.642 | 0.00 | 0.00 | C |
| ATOM | 2910 | H    | ALA | 183 | 31.069 | 58.286 | 14.124 | 0.00 | 0.00 | H |
| ATOM | 2911 | HA   | ALA | 183 | 31.427 | 60.041 | 16.364 | 0.00 | 0.00 | H |
| ATOM | 2912 | HB1  | ALA | 183 | 30.229 | 61.986 | 15.208 | 0.00 | 0.00 | H |
| ATOM | 2913 | HB2  | ALA | 183 | 31.791 | 61.477 | 14.377 | 0.00 | 0.00 | H |
| ATOM | 2914 | HB3  | ALA | 183 | 30.198 | 60.986 | 13.741 | 0.00 | 0.00 | H |
| ATOM | 2915 | N    | ALA | 184 | 28.876 | 58.522 | 15.108 | 0.00 | 0.00 | N |
| ATOM | 2916 | CA   | ALA | 184 | 27.476 | 58.155 | 15.215 | 0.00 | 0.00 | C |
| ATOM | 2917 | C    | ALA | 184 | 27.021 | 57.585 | 16.584 | 0.00 | 0.00 | C |
| ATOM | 2918 | O    | ALA | 184 | 25.817 | 57.701 | 16.907 | 0.00 | 0.00 | O |
| ATOM | 2919 | CB   | ALA | 184 | 27.177 | 57.102 | 14.174 | 0.00 | 0.00 | C |
| ATOM | 2920 | H    | ALA | 184 | 29.436 | 58.171 | 14.345 | 0.00 | 0.00 | H |
| ATOM | 2921 | HA   | ALA | 184 | 26.814 | 59.006 | 15.048 | 0.00 | 0.00 | H |
| ATOM | 2922 | HB1  | ALA | 184 | 26.118 | 56.853 | 14.108 | 0.00 | 0.00 | H |
| ATOM | 2923 | HB2  | ALA | 184 | 27.651 | 57.496 | 13.276 | 0.00 | 0.00 | H |
| ATOM | 2924 | HB3  | ALA | 184 | 27.651 | 56.197 | 14.555 | 0.00 | 0.00 | H |
| ATOM | 2925 | N    | LEU | 185 | 27.912 | 56.948 | 17.294 | 0.00 | 0.00 | N |
| ATOM | 2926 | CA   | LEU | 185 | 27.664 | 56.269 | 18.623 | 0.00 | 0.00 | C |
| ATOM | 2927 | C    | LEU | 185 | 27.947 | 57.226 | 19.763 | 0.00 | 0.00 | C |
| ATOM | 2928 | O    | LEU | 185 | 27.423 | 57.081 | 20.802 | 0.00 | 0.00 | O |
| ATOM | 2929 | CB   | LEU | 185 | 28.470 | 54.942 | 18.783 | 0.00 | 0.00 | C |
| ATOM | 2930 | CG   | LEU | 185 | 27.899 | 54.057 | 19.922 | 0.00 | 0.00 | C |
| ATOM | 2931 | CD1  | LEU | 185 | 26.469 | 53.597 | 19.699 | 0.00 | 0.00 | C |
| ATOM | 2932 | CD2  | LEU | 185 | 28.786 | 52.835 | 19.966 | 0.00 | 0.00 | C |
| ATOM | 2933 | H    | LEU | 185 | 28.867 | 56.912 | 16.969 | 0.00 | 0.00 | H |
| ATOM | 2934 | HA   | LEU | 185 | 26.610 | 55.994 | 18.654 | 0.00 | 0.00 | H |
| ATOM | 2935 | HB2  | LEU | 185 | 28.444 | 54.411 | 17.831 | 0.00 | 0.00 | H |
| ATOM | 2936 | HB3  | LEU | 185 | 29.538 | 55.109 | 18.920 | 0.00 | 0.00 | H |
| ATOM | 2937 | HG   | LEU | 185 | 28.008 | 54.548 | 20.889 | 0.00 | 0.00 | H |
| ATOM | 2938 | HD11 | LEU | 185 | 25.728 | 54.392 | 19.785 | 0.00 | 0.00 | H |
| ATOM | 2939 | HD12 | LEU | 185 | 26.218 | 52.824 | 20.425 | 0.00 | 0.00 | H |
| ATOM | 2940 | HD13 | LEU | 185 | 26.400 | 53.078 | 18.743 | 0.00 | 0.00 | H |
| ATOM | 2941 | HD21 | LEU | 185 | 29.834 | 53.118 | 20.067 | 0.00 | 0.00 | H |
| ATOM | 2942 | HD22 | LEU | 185 | 28.851 | 52.254 | 19.047 | 0.00 | 0.00 | H |
| ATOM | 2943 | HD23 | LEU | 185 | 28.448 | 52.115 | 20.712 | 0.00 | 0.00 | H |
| ATOM | 2944 | N    | ASN | 186 | 28.833 | 58.260 | 19.539 | 0.00 | 0.00 | N |
| ATOM | 2945 | CA   | ASN | 186 | 29.429 | 59.100 | 20.613 | 0.00 | 0.00 | C |
| ATOM | 2946 | C    | ASN | 186 | 28.522 | 60.212 | 21.159 | 0.00 | 0.00 | C |
| ATOM | 2947 | O    | ASN | 186 | 27.925 | 60.976 | 20.356 | 0.00 | 0.00 | O |
| ATOM | 2948 | CB   | ASN | 186 | 30.690 | 59.830 | 20.092 | 0.00 | 0.00 | C |
| ATOM | 2949 | CG   | ASN | 186 | 31.274 | 60.956 | 20.932 | 0.00 | 0.00 | C |
| ATOM | 2950 | ND2  | ASN | 186 | 30.812 | 62.192 | 20.694 | 0.00 | 0.00 | N |
| ATOM | 2951 | OD1  | ASN | 186 | 32.158 | 60.830 | 21.745 | 0.00 | 0.00 | O |
| ATOM | 2952 | H    | ASN | 186 | 29.215 | 58.373 | 18.610 | 0.00 | 0.00 | H |
| ATOM | 2953 | HA   | ASN | 186 | 29.656 | 58.444 | 21.454 | 0.00 | 0.00 | H |
| ATOM | 2954 | HB2  | ASN | 186 | 31.439 | 59.089 | 19.814 | 0.00 | 0.00 | H |
| ATOM | 2955 | HB3  | ASN | 186 | 30.380 | 60.199 | 19.114 | 0.00 | 0.00 | H |
| ATOM | 2956 | HD21 | ASN | 186 | 31.196 | 62.950 | 21.240 | 0.00 | 0.00 | H |
| ATOM | 2957 | HD22 | ASN | 186 | 30.251 | 62.297 | 19.860 | 0.00 | 0.00 | H |

|      |      |      |     |     |        |        |        |      |      |   |
|------|------|------|-----|-----|--------|--------|--------|------|------|---|
| ATOM | 2958 | N    | LEU | 187 | 28.527 | 60.436 | 22.455 | 0.00 | 0.00 | N |
| ATOM | 2959 | CA   | LEU | 187 | 27.992 | 61.694 | 23.039 | 0.00 | 0.00 | C |
| ATOM | 2960 | C    | LEU | 187 | 29.092 | 62.619 | 23.621 | 0.00 | 0.00 | C |
| ATOM | 2961 | O    | LEU | 187 | 29.494 | 62.579 | 24.802 | 0.00 | 0.00 | O |
| ATOM | 2962 | CB   | LEU | 187 | 26.907 | 61.393 | 24.048 | 0.00 | 0.00 | C |
| ATOM | 2963 | CG   | LEU | 187 | 26.156 | 62.741 | 24.424 | 0.00 | 0.00 | C |
| ATOM | 2964 | CD1  | LEU | 187 | 25.606 | 63.642 | 23.270 | 0.00 | 0.00 | C |
| ATOM | 2965 | CD2  | LEU | 187 | 24.991 | 62.510 | 25.348 | 0.00 | 0.00 | C |
| ATOM | 2966 | H    | LEU | 187 | 28.971 | 59.755 | 23.055 | 0.00 | 0.00 | H |
| ATOM | 2967 | HA   | LEU | 187 | 27.508 | 62.337 | 22.304 | 0.00 | 0.00 | H |
| ATOM | 2968 | HB2  | LEU | 187 | 26.170 | 60.797 | 23.512 | 0.00 | 0.00 | H |
| ATOM | 2969 | HB3  | LEU | 187 | 27.380 | 60.843 | 24.862 | 0.00 | 0.00 | H |
| ATOM | 2970 | HG   | LEU | 187 | 26.852 | 63.358 | 24.992 | 0.00 | 0.00 | H |
| ATOM | 2971 | HD11 | LEU | 187 | 26.412 | 63.996 | 22.626 | 0.00 | 0.00 | H |
| ATOM | 2972 | HD12 | LEU | 187 | 25.125 | 64.530 | 23.680 | 0.00 | 0.00 | H |
| ATOM | 2973 | HD13 | LEU | 187 | 25.027 | 63.133 | 22.499 | 0.00 | 0.00 | H |
| ATOM | 2974 | HD21 | LEU | 187 | 24.163 | 61.911 | 24.972 | 0.00 | 0.00 | H |
| ATOM | 2975 | HD22 | LEU | 187 | 24.647 | 63.460 | 25.758 | 0.00 | 0.00 | H |
| ATOM | 2976 | HD23 | LEU | 187 | 25.354 | 61.889 | 26.167 | 0.00 | 0.00 | H |
| TER  | 2977 |      | LEU | 187 |        |        |        |      |      |   |
| ATOM | 2978 | O    | WAT | 191 | 10.479 | 46.931 | 2.205  | 0.00 | 0.00 | O |
| ATOM | 2979 | H1   | WAT | 191 | 9.741  | 46.940 | 1.596  | 0.00 | 0.00 | H |
| ATOM | 2980 | H2   | WAT | 191 | 10.261 | 46.243 | 2.836  | 0.00 | 0.00 | H |
| TER  | 2981 |      | WAT | 191 |        |        |        |      |      |   |
| ATOM | 2982 | O    | WAT | 206 | 6.490  | 29.530 | 15.427 | 0.00 | 0.00 | O |
| ATOM | 2983 | H1   | WAT | 206 | 6.504  | 29.830 | 14.519 | 0.00 | 0.00 | H |
| ATOM | 2984 | H2   | WAT | 206 | 5.796  | 28.871 | 15.451 | 0.00 | 0.00 | H |
| TER  | 2985 |      | WAT | 206 |        |        |        |      |      |   |
| ATOM | 2986 | O    | WAT | 300 | 8.437  | 48.928 | 30.193 | 0.00 | 0.00 | O |
| ATOM | 2987 | H1   | WAT | 300 | 8.733  | 48.489 | 29.396 | 0.00 | 0.00 | H |
| ATOM | 2988 | H2   | WAT | 300 | 8.665  | 49.848 | 30.059 | 0.00 | 0.00 | H |
| TER  | 2989 |      | WAT | 300 |        |        |        |      |      |   |
| ATOM | 2990 | O    | WAT | 322 | 9.198  | 54.205 | 16.743 | 0.00 | 0.00 | O |
| ATOM | 2991 | H1   | WAT | 322 | 9.056  | 54.053 | 15.809 | 0.00 | 0.00 | H |
| ATOM | 2992 | H2   | WAT | 322 | 8.908  | 53.396 | 17.164 | 0.00 | 0.00 | H |
| TER  | 2993 |      | WAT | 322 |        |        |        |      |      |   |
| ATOM | 2994 | O    | WAT | 333 | 35.736 | 38.454 | 5.726  | 0.00 | 0.00 | O |
| ATOM | 2995 | H1   | WAT | 333 | 35.840 | 37.750 | 6.367  | 0.00 | 0.00 | H |
| ATOM | 2996 | H2   | WAT | 333 | 35.633 | 38.001 | 4.889  | 0.00 | 0.00 | H |
| TER  | 2997 |      | WAT | 333 |        |        |        |      |      |   |
| ATOM | 2998 | O    | WAT | 468 | 25.024 | 26.466 | 23.428 | 0.00 | 0.00 | O |
| ATOM | 2999 | H1   | WAT | 468 | 24.700 | 26.697 | 24.299 | 0.00 | 0.00 | H |
| ATOM | 3000 | H2   | WAT | 468 | 25.455 | 27.260 | 23.113 | 0.00 | 0.00 | H |
| TER  | 3001 |      | WAT | 468 |        |        |        |      |      |   |
| ATOM | 3002 | O    | WAT | 554 | 14.724 | 63.364 | 23.766 | 0.00 | 0.00 | O |
| ATOM | 3003 | H1   | WAT | 554 | 15.100 | 62.712 | 24.356 | 0.00 | 0.00 | H |
| ATOM | 3004 | H2   | WAT | 554 | 13.808 | 63.433 | 24.036 | 0.00 | 0.00 | H |
| TER  | 3005 |      | WAT | 554 |        |        |        |      |      |   |
| ATOM | 3006 | O    | WAT | 570 | 34.919 | 30.549 | 27.351 | 0.00 | 0.00 | O |
| ATOM | 3007 | H1   | WAT | 570 | 33.972 | 30.683 | 27.379 | 0.00 | 0.00 | H |
| ATOM | 3008 | H2   | WAT | 570 | 35.288 | 31.424 | 27.467 | 0.00 | 0.00 | H |
| TER  | 3009 |      | WAT | 570 |        |        |        |      |      |   |
| ATOM | 3010 | O    | WAT | 619 | 29.709 | 30.332 | 9.611  | 0.00 | 0.00 | O |
| ATOM | 3011 | H1   | WAT | 619 | 30.545 | 30.744 | 9.828  | 0.00 | 0.00 | H |
| ATOM | 3012 | H2   | WAT | 619 | 29.846 | 29.402 | 9.794  | 0.00 | 0.00 | H |
| TER  | 3013 |      | WAT | 619 |        |        |        |      |      |   |
| ATOM | 3014 | O    | WAT | 653 | 26.355 | 54.787 | 1.195  | 0.00 | 0.00 | O |
| ATOM | 3015 | H1   | WAT | 653 | 26.195 | 55.636 | 0.783  | 0.00 | 0.00 | H |
| ATOM | 3016 | H2   | WAT | 653 | 25.859 | 54.165 | 0.664  | 0.00 | 0.00 | H |
| TER  | 3017 |      | WAT | 653 |        |        |        |      |      |   |
| ATOM | 3018 | O    | WAT | 673 | 5.528  | 48.222 | 13.308 | 0.00 | 0.00 | O |
| ATOM | 3019 | H1   | WAT | 673 | 4.572  | 48.190 | 13.338 | 0.00 | 0.00 | H |
| ATOM | 3020 | H2   | WAT | 673 | 5.743  | 48.090 | 12.384 | 0.00 | 0.00 | H |
| TER  | 3021 |      | WAT | 673 |        |        |        |      |      |   |
| ATOM | 3022 | O    | WAT | 697 | 19.906 | 61.714 | 3.825  | 0.00 | 0.00 | O |
| ATOM | 3023 | H1   | WAT | 697 | 20.030 | 62.221 | 4.627  | 0.00 | 0.00 | H |
| ATOM | 3024 | H2   | WAT | 697 | 20.102 | 60.812 | 4.079  | 0.00 | 0.00 | H |
| TER  | 3025 |      | WAT | 697 |        |        |        |      |      |   |
| ATOM | 3026 | O    | WAT | 721 | 31.421 | 35.437 | 33.725 | 0.00 | 0.00 | O |
| ATOM | 3027 | H1   | WAT | 721 | 32.188 | 34.907 | 33.947 | 0.00 | 0.00 | H |
| ATOM | 3028 | H2   | WAT | 721 | 31.548 | 36.255 | 34.204 | 0.00 | 0.00 | H |
| TER  | 3029 |      | WAT | 721 |        |        |        |      |      |   |
| ATOM | 3030 | O    | WAT | 742 | 16.952 | 59.473 | 12.247 | 0.00 | 0.00 | O |
| ATOM | 3031 | H1   | WAT | 742 | 17.047 | 60.423 | 12.184 | 0.00 | 0.00 | H |
| ATOM | 3032 | H2   | WAT | 742 | 16.481 | 59.226 | 11.451 | 0.00 | 0.00 | H |
| TER  | 3033 |      | WAT | 742 |        |        |        |      |      |   |
| ATOM | 3034 | O    | WAT | 750 | 28.714 | 45.821 | 34.380 | 0.00 | 0.00 | O |
| ATOM | 3035 | H1   | WAT | 750 | 28.878 | 46.540 | 34.991 | 0.00 | 0.00 | H |
| ATOM | 3036 | H2   | WAT | 750 | 28.035 | 46.156 | 33.794 | 0.00 | 0.00 | H |
| TER  | 3037 |      | WAT | 750 |        |        |        |      |      |   |
| ATOM | 3038 | O    | WAT | 784 | 43.066 | 55.832 | 14.652 | 0.00 | 0.00 | O |
| ATOM | 3039 | H1   | WAT | 784 | 42.603 | 55.094 | 14.256 | 0.00 | 0.00 | H |
| ATOM | 3040 | H2   | WAT | 784 | 42.668 | 55.928 | 15.516 | 0.00 | 0.00 | H |
| TER  | 3041 |      | WAT | 784 |        |        |        |      |      |   |
| ATOM | 3042 | O    | WAT | 804 | 12.775 | 27.590 | 11.639 | 0.00 | 0.00 | O |
| ATOM | 3043 | H1   | WAT | 804 | 13.698 | 27.439 | 11.435 | 0.00 | 0.00 | H |
| ATOM | 3044 | H2   | WAT | 804 | 12.310 | 27.345 | 10.838 | 0.00 | 0.00 | H |
| ATOM | 3045 | O    | WAT | 805 | 3.797  | 32.064 | 10.560 | 0.00 | 0.00 | O |
| ATOM | 3046 | H1   | WAT | 805 | 4.543  | 32.253 | 9.993  | 0.00 | 0.00 | H |
| ATOM | 3047 | H2   | WAT | 805 | 4.159  | 32.074 | 11.446 | 0.00 | 0.00 | H |
| TER  | 3048 |      | WAT | 805 |        |        |        |      |      |   |
| ATOM | 3049 | O    | WAT | 845 | 27.714 | 38.718 | 0.524  | 0.00 | 0.00 | O |
| ATOM | 3050 | H1   | WAT | 845 | 27.013 | 38.069 | 0.480  | 0.00 | 0.00 | H |
| ATOM | 3051 | H2   | WAT | 845 | 27.595 | 39.144 | 1.372  | 0.00 | 0.00 | H |
| TER  | 3052 |      | WAT | 845 |        |        |        |      |      |   |
| ATOM | 3053 | O    | WAT | 857 | 39.151 | 44.063 | 32.842 | 0.00 | 0.00 | O |
| ATOM | 3054 | H1   | WAT | 857 | 38.811 | 44.062 | 33.737 | 0.00 | 0.00 | H |
| ATOM | 3055 | H2   | WAT | 857 | 38.885 | 44.910 | 32.485 | 0.00 | 0.00 | H |
| TER  | 3056 |      | WAT | 857 |        |        |        |      |      |   |
| ATOM | 3057 | O    | WAT | 897 | 18.587 | 35.688 | 31.280 | 0.00 | 0.00 | O |
| ATOM | 3058 | H1   | WAT | 897 | 18.937 | 36.497 | 30.909 | 0.00 | 0.00 | H |
| ATOM | 3059 | H2   | WAT | 897 | 19.361 | 35.173 | 31.508 | 0.00 | 0.00 | H |
| TER  | 3060 |      | WAT | 897 |        |        |        |      |      |   |
| ATOM | 3061 | O    | WAT | 901 | 15.196 | 20.709 | 12.545 | 0.00 | 0.00 | O |
| ATOM | 3062 | H1   | WAT | 901 | 14.573 | 20.407 | 13.206 | 0.00 | 0.00 | H |

|      |      |    |     |      |        |        |        |      |      |   |
|------|------|----|-----|------|--------|--------|--------|------|------|---|
| ATOM | 3063 | H2 | WAT | 901  | 14.701 | 21.339 | 12.020 | 0.00 | 0.00 | H |
| TER  | 3064 |    | WAT | 901  |        |        |        |      |      |   |
| ATOM | 3065 | O  | WAT | 908  | 12.026 | 39.106 | 10.131 | 0.00 | 0.00 | O |
| ATOM | 3066 | H1 | WAT | 908  | 11.185 | 39.116 | 9.673  | 0.00 | 0.00 | H |
| ATOM | 3067 | H2 | WAT | 908  | 12.105 | 38.214 | 10.468 | 0.00 | 0.00 | H |
| TER  | 3068 |    | WAT | 908  |        |        |        |      |      |   |
| ATOM | 3069 | O  | WAT | 927  | 8.768  | 53.591 | 14.022 | 0.00 | 0.00 | O |
| ATOM | 3070 | H1 | WAT | 927  | 8.308  | 54.325 | 13.616 | 0.00 | 0.00 | H |
| ATOM | 3071 | H2 | WAT | 927  | 8.848  | 52.942 | 13.324 | 0.00 | 0.00 | H |
| TER  | 3072 |    | WAT | 927  |        |        |        |      |      |   |
| ATOM | 3073 | O  | WAT | 934  | 29.779 | 48.295 | 31.874 | 0.00 | 0.00 | O |
| ATOM | 3074 | H1 | WAT | 934  | 30.610 | 47.836 | 32.000 | 0.00 | 0.00 | H |
| ATOM | 3075 | H2 | WAT | 934  | 29.150 | 47.798 | 32.395 | 0.00 | 0.00 | H |
| TER  | 3076 |    | WAT | 934  |        |        |        |      |      |   |
| ATOM | 3077 | O  | WAT | 955  | 20.320 | 28.744 | 25.502 | 0.00 | 0.00 | O |
| ATOM | 3078 | H1 | WAT | 955  | 19.390 | 28.539 | 25.406 | 0.00 | 0.00 | H |
| ATOM | 3079 | H2 | WAT | 955  | 20.335 | 29.565 | 25.993 | 0.00 | 0.00 | H |
| TER  | 3080 |    | WAT | 955  |        |        |        |      |      |   |
| ATOM | 3081 | O  | WAT | 1030 | 25.630 | 52.636 | 30.480 | 0.00 | 0.00 | O |
| ATOM | 3082 | H1 | WAT | 1030 | 24.761 | 52.419 | 30.821 | 0.00 | 0.00 | H |
| ATOM | 3083 | H2 | WAT | 1030 | 25.783 | 51.991 | 29.790 | 0.00 | 0.00 | H |
| TER  | 3084 |    | WAT | 1030 |        |        |        |      |      |   |
| ATOM | 3085 | O  | WAT | 1034 | 33.381 | 35.403 | 42.792 | 0.00 | 0.00 | O |
| ATOM | 3086 | H1 | WAT | 1034 | 34.323 | 35.279 | 42.911 | 0.00 | 0.00 | H |
| ATOM | 3087 | H2 | WAT | 1034 | 33.306 | 36.230 | 42.317 | 0.00 | 0.00 | H |
| TER  | 3088 |    | WAT | 1034 |        |        |        |      |      |   |
| ATOM | 3089 | O  | WAT | 1068 | 37.460 | 32.653 | 17.157 | 0.00 | 0.00 | O |
| ATOM | 3090 | H1 | WAT | 1068 | 38.127 | 32.562 | 17.838 | 0.00 | 0.00 | H |
| ATOM | 3091 | H2 | WAT | 1068 | 36.694 | 32.200 | 17.510 | 0.00 | 0.00 | H |
| TER  | 3092 |    | WAT | 1068 |        |        |        |      |      |   |
| ATOM | 3093 | O  | WAT | 1119 | 8.989  | 29.290 | 12.763 | 0.00 | 0.00 | O |
| ATOM | 3094 | H1 | WAT | 1119 | 8.064  | 29.531 | 12.748 | 0.00 | 0.00 | H |
| ATOM | 3095 | H2 | WAT | 1119 | 9.280  | 29.402 | 11.858 | 0.00 | 0.00 | H |
| TER  | 3096 |    | WAT | 1119 |        |        |        |      |      |   |
| ATOM | 3097 | O  | WAT | 1129 | 16.227 | 40.126 | 31.778 | 0.00 | 0.00 | O |
| ATOM | 3098 | H1 | WAT | 1129 | 16.319 | 39.740 | 32.649 | 0.00 | 0.00 | H |
| ATOM | 3099 | H2 | WAT | 1129 | 15.303 | 40.370 | 31.721 | 0.00 | 0.00 | H |
| TER  | 3100 |    | WAT | 1129 |        |        |        |      |      |   |
| ATOM | 3101 | O  | WAT | 1144 | 17.688 | 48.457 | 31.937 | 0.00 | 0.00 | O |
| ATOM | 3102 | H1 | WAT | 1144 | 18.368 | 48.466 | 31.262 | 0.00 | 0.00 | H |
| ATOM | 3103 | H2 | WAT | 1144 | 17.235 | 47.623 | 31.810 | 0.00 | 0.00 | H |
| TER  | 3104 |    | WAT | 1144 |        |        |        |      |      |   |
| ATOM | 3105 | O  | WAT | 1153 | 36.633 | 37.865 | 10.760 | 0.00 | 0.00 | O |
| ATOM | 3106 | H1 | WAT | 1153 | 35.914 | 37.253 | 10.918 | 0.00 | 0.00 | H |
| ATOM | 3107 | H2 | WAT | 1153 | 37.378 | 37.307 | 10.539 | 0.00 | 0.00 | H |
| TER  | 3108 |    | WAT | 1153 |        |        |        |      |      |   |
| ATOM | 3109 | O  | WAT | 1187 | 39.430 | 39.593 | 43.218 | 0.00 | 0.00 | O |
| ATOM | 3110 | H1 | WAT | 1187 | 39.957 | 38.811 | 43.055 | 0.00 | 0.00 | H |
| ATOM | 3111 | H2 | WAT | 1187 | 38.585 | 39.403 | 42.810 | 0.00 | 0.00 | H |
| TER  | 3112 |    | WAT | 1187 |        |        |        |      |      |   |
| ATOM | 3113 | O  | WAT | 1202 | 29.276 | 38.146 | 36.144 | 0.00 | 0.00 | O |
| ATOM | 3114 | H1 | WAT | 1202 | 29.403 | 37.491 | 36.832 | 0.00 | 0.00 | H |
| ATOM | 3115 | H2 | WAT | 1202 | 30.075 | 38.099 | 35.619 | 0.00 | 0.00 | H |
| TER  | 3116 |    | WAT | 1202 |        |        |        |      |      |   |
| ATOM | 3117 | O  | WAT | 1207 | 12.712 | 59.110 | 27.948 | 0.00 | 0.00 | O |
| ATOM | 3118 | H1 | WAT | 1207 | 13.101 | 58.515 | 27.307 | 0.00 | 0.00 | H |
| ATOM | 3119 | H2 | WAT | 1207 | 12.905 | 58.707 | 28.795 | 0.00 | 0.00 | H |
| TER  | 3120 |    | WAT | 1207 |        |        |        |      |      |   |
| ATOM | 3121 | O  | WAT | 1215 | 37.335 | 54.161 | 10.303 | 0.00 | 0.00 | O |
| ATOM | 3122 | H1 | WAT | 1215 | 36.616 | 54.555 | 9.809  | 0.00 | 0.00 | H |
| ATOM | 3123 | H2 | WAT | 1215 | 37.037 | 53.271 | 10.489 | 0.00 | 0.00 | H |
| TER  | 3124 |    | WAT | 1215 |        |        |        |      |      |   |
| ATOM | 3125 | O  | WAT | 1228 | 35.828 | 35.929 | 7.140  | 0.00 | 0.00 | O |
| ATOM | 3126 | H1 | WAT | 1228 | 35.340 | 35.653 | 7.916  | 0.00 | 0.00 | H |
| ATOM | 3127 | H2 | WAT | 1228 | 35.667 | 35.238 | 6.498  | 0.00 | 0.00 | H |
| TER  | 3128 |    | WAT | 1228 |        |        |        |      |      |   |
| ATOM | 3129 | O  | WAT | 1295 | 8.632  | 53.219 | 7.676  | 0.00 | 0.00 | O |
| ATOM | 3130 | H1 | WAT | 1295 | 8.636  | 52.267 | 7.777  | 0.00 | 0.00 | H |
| ATOM | 3131 | H2 | WAT | 1295 | 9.390  | 53.405 | 7.121  | 0.00 | 0.00 | H |
| TER  | 3132 |    | WAT | 1295 |        |        |        |      |      |   |
| ATOM | 3133 | O  | WAT | 1311 | 15.384 | 29.594 | 26.398 | 0.00 | 0.00 | O |
| ATOM | 3134 | H1 | WAT | 1311 | 15.785 | 30.352 | 25.972 | 0.00 | 0.00 | H |
| ATOM | 3135 | H2 | WAT | 1311 | 14.931 | 29.957 | 27.158 | 0.00 | 0.00 | H |
| TER  | 3136 |    | WAT | 1311 |        |        |        |      |      |   |
| ATOM | 3137 | O  | WAT | 1315 | 42.198 | 54.640 | 21.130 | 0.00 | 0.00 | O |
| ATOM | 3138 | H1 | WAT | 1315 | 42.772 | 54.992 | 20.449 | 0.00 | 0.00 | H |
| ATOM | 3139 | H2 | WAT | 1315 | 42.595 | 53.803 | 21.369 | 0.00 | 0.00 | H |
| TER  | 3140 |    | WAT | 1315 |        |        |        |      |      |   |
| ATOM | 3141 | O  | WAT | 1398 | 7.242  | 49.549 | 18.227 | 0.00 | 0.00 | O |
| ATOM | 3142 | H1 | WAT | 1398 | 7.024  | 50.111 | 18.970 | 0.00 | 0.00 | H |
| ATOM | 3143 | H2 | WAT | 1398 | 8.024  | 49.951 | 17.845 | 0.00 | 0.00 | H |
| ATOM | 3144 | O  | WAT | 1399 | 45.283 | 33.291 | 17.053 | 0.00 | 0.00 | O |
| ATOM | 3145 | H1 | WAT | 1399 | 46.094 | 32.941 | 17.423 | 0.00 | 0.00 | H |
| ATOM | 3146 | H2 | WAT | 1399 | 44.821 | 33.668 | 17.803 | 0.00 | 0.00 | H |
| TER  | 3147 |    | WAT | 1399 |        |        |        |      |      |   |
| ATOM | 3148 | O  | WAT | 1404 | 22.961 | 32.479 | 26.460 | 0.00 | 0.00 | O |
| ATOM | 3149 | H1 | WAT | 1404 | 23.282 | 33.099 | 27.114 | 0.00 | 0.00 | H |
| ATOM | 3150 | H2 | WAT | 1404 | 22.802 | 31.673 | 26.952 | 0.00 | 0.00 | H |
| TER  | 3151 |    | WAT | 1404 |        |        |        |      |      |   |
| ATOM | 3152 | O  | WAT | 1416 | 15.013 | 30.804 | 19.490 | 0.00 | 0.00 | O |
| ATOM | 3153 | H1 | WAT | 1416 | 14.743 | 30.756 | 18.573 | 0.00 | 0.00 | H |
| ATOM | 3154 | H2 | WAT | 1416 | 15.361 | 31.691 | 19.590 | 0.00 | 0.00 | H |
| TER  | 3155 |    | WAT | 1416 |        |        |        |      |      |   |
| ATOM | 3156 | O  | WAT | 1442 | 44.518 | 46.374 | 24.886 | 0.00 | 0.00 | O |
| ATOM | 3157 | H1 | WAT | 1442 | 44.226 | 45.468 | 24.979 | 0.00 | 0.00 | H |
| ATOM | 3158 | H2 | WAT | 1442 | 45.450 | 46.307 | 24.676 | 0.00 | 0.00 | H |
| TER  | 3159 |    | WAT | 1442 |        |        |        |      |      |   |
| ATOM | 3160 | O  | WAT | 1487 | 16.661 | 33.844 | 31.417 | 0.00 | 0.00 | O |
| ATOM | 3161 | H1 | WAT | 1487 | 16.964 | 32.938 | 31.483 | 0.00 | 0.00 | H |
| ATOM | 3162 | H2 | WAT | 1487 | 17.463 | 34.360 | 31.336 | 0.00 | 0.00 | H |
| TER  | 3163 |    | WAT | 1487 |        |        |        |      |      |   |
| ATOM | 3164 | O  | WAT | 1499 | 11.072 | 31.059 | 27.551 | 0.00 | 0.00 | O |
| ATOM | 3165 | H1 | WAT | 1499 | 10.877 | 30.915 | 26.625 | 0.00 | 0.00 | H |
| ATOM | 3166 | H2 | WAT | 1499 | 10.930 | 31.997 | 27.683 | 0.00 | 0.00 | H |
| TER  | 3167 |    | WAT | 1499 |        |        |        |      |      |   |

|      |      |    |     |      |        |        |        |      |      |   |
|------|------|----|-----|------|--------|--------|--------|------|------|---|
| ATOM | 3168 | 0  | WAT | 1508 | 37.966 | 54.516 | 26.275 | 0.00 | 0.00 | 0 |
| ATOM | 3169 | H1 | WAT | 1508 | 37.318 | 55.179 | 26.038 | 0.00 | 0.00 | H |
| ATOM | 3170 | H2 | WAT | 1508 | 37.748 | 53.760 | 25.729 | 0.00 | 0.00 | H |
| TER  | 3171 |    | WAT | 1508 |        |        |        |      |      |   |
| ATOM | 3172 | 0  | WAT | 1546 | 24.372 | 38.257 | 1.955  | 0.00 | 0.00 | 0 |
| ATOM | 3173 | H1 | WAT | 1546 | 24.049 | 39.012 | 1.464  | 0.00 | 0.00 | H |
| ATOM | 3174 | H2 | WAT | 1546 | 24.497 | 38.588 | 2.845  | 0.00 | 0.00 | H |
| TER  | 3175 |    | WAT | 1546 |        |        |        |      |      |   |
| ATOM | 3176 | 0  | WAT | 1564 | 35.056 | 59.050 | 18.236 | 0.00 | 0.00 | 0 |
| ATOM | 3177 | H1 | WAT | 1564 | 34.607 | 59.155 | 17.396 | 0.00 | 0.00 | H |
| ATOM | 3178 | H2 | WAT | 1564 | 35.062 | 59.927 | 18.617 | 0.00 | 0.00 | H |
| TER  | 3179 |    | WAT | 1564 |        |        |        |      |      |   |
| ATOM | 3180 | 0  | WAT | 1592 | 9.314  | 35.963 | 10.805 | 0.00 | 0.00 | 0 |
| ATOM | 3181 | H1 | WAT | 1592 | 8.730  | 36.060 | 11.556 | 0.00 | 0.00 | H |
| ATOM | 3182 | H2 | WAT | 1592 | 10.171 | 36.235 | 11.130 | 0.00 | 0.00 | H |
| TER  | 3183 |    | WAT | 1592 |        |        |        |      |      |   |
| ATOM | 3184 | 0  | WAT | 1607 | 31.580 | 26.483 | 26.648 | 0.00 | 0.00 | 0 |
| ATOM | 3185 | H1 | WAT | 1607 | 31.000 | 27.143 | 27.027 | 0.00 | 0.00 | H |
| ATOM | 3186 | H2 | WAT | 1607 | 32.240 | 26.989 | 26.172 | 0.00 | 0.00 | H |
| TER  | 3187 |    | WAT | 1607 |        |        |        |      |      |   |
| ATOM | 3188 | 0  | WAT | 1709 | 33.807 | 44.056 | 38.864 | 0.00 | 0.00 | 0 |
| ATOM | 3189 | H1 | WAT | 1709 | 33.852 | 43.945 | 39.814 | 0.00 | 0.00 | H |
| ATOM | 3190 | H2 | WAT | 1709 | 34.208 | 43.262 | 38.511 | 0.00 | 0.00 | H |
| TER  | 3191 |    | WAT | 1709 |        |        |        |      |      |   |
| ATOM | 3192 | 0  | WAT | 1721 | 37.551 | 30.358 | 26.968 | 0.00 | 0.00 | 0 |
| ATOM | 3193 | H1 | WAT | 1721 | 37.676 | 31.179 | 26.491 | 0.00 | 0.00 | H |
| ATOM | 3194 | H2 | WAT | 1721 | 36.604 | 30.220 | 26.964 | 0.00 | 0.00 | H |
| TER  | 3195 |    | WAT | 1721 |        |        |        |      |      |   |
| ATOM | 3196 | 0  | WAT | 1730 | 16.595 | 47.792 | 4.906  | 0.00 | 0.00 | 0 |
| ATOM | 3197 | H1 | WAT | 1730 | 17.039 | 48.106 | 4.118  | 0.00 | 0.00 | H |
| ATOM | 3198 | H2 | WAT | 1730 | 17.305 | 47.527 | 5.491  | 0.00 | 0.00 | H |
| TER  | 3199 |    | WAT | 1730 |        |        |        |      |      |   |
| ATOM | 3200 | 0  | WAT | 1742 | 16.081 | 19.533 | 18.737 | 0.00 | 0.00 | 0 |
| ATOM | 3201 | H1 | WAT | 1742 | 17.037 | 19.573 | 18.702 | 0.00 | 0.00 | H |
| ATOM | 3202 | H2 | WAT | 1742 | 15.805 | 19.602 | 17.824 | 0.00 | 0.00 | H |
| ATOM | 3203 | 0  | WAT | 1743 | 30.485 | 40.458 | 41.948 | 0.00 | 0.00 | 0 |
| ATOM | 3204 | H1 | WAT | 1743 | 30.759 | 40.486 | 41.031 | 0.00 | 0.00 | H |
| ATOM | 3205 | H2 | WAT | 1743 | 30.157 | 41.339 | 42.128 | 0.00 | 0.00 | H |
| TER  | 3206 |    | WAT | 1743 |        |        |        |      |      |   |
| ATOM | 3207 | 0  | WAT | 1748 | 14.138 | 64.179 | 31.700 | 0.00 | 0.00 | 0 |
| ATOM | 3208 | H1 | WAT | 1748 | 13.795 | 64.179 | 30.807 | 0.00 | 0.00 | H |
| ATOM | 3209 | H2 | WAT | 1748 | 14.411 | 65.083 | 31.852 | 0.00 | 0.00 | H |
| ATOM | 3210 | 0  | WAT | 1749 | 6.706  | 52.020 | 16.905 | 0.00 | 0.00 | 0 |
| ATOM | 3211 | H1 | WAT | 1749 | 7.608  | 51.850 | 17.176 | 0.00 | 0.00 | H |
| ATOM | 3212 | H2 | WAT | 1749 | 6.502  | 51.313 | 16.293 | 0.00 | 0.00 | H |
| ATOM | 3213 | 0  | WAT | 1750 | 38.312 | 38.029 | 28.131 | 0.00 | 0.00 | 0 |
| ATOM | 3214 | H1 | WAT | 1750 | 38.440 | 38.642 | 28.854 | 0.00 | 0.00 | H |
| ATOM | 3215 | H2 | WAT | 1750 | 39.105 | 38.111 | 27.603 | 0.00 | 0.00 | H |
| TER  | 3216 |    | WAT | 1750 |        |        |        |      |      |   |
| ATOM | 3217 | 0  | WAT | 1769 | 22.090 | 23.253 | 5.117  | 0.00 | 0.00 | 0 |
| ATOM | 3218 | H1 | WAT | 1769 | 22.547 | 23.826 | 5.732  | 0.00 | 0.00 | H |
| ATOM | 3219 | H2 | WAT | 1769 | 22.664 | 22.491 | 5.028  | 0.00 | 0.00 | H |
| TER  | 3220 |    | WAT | 1769 |        |        |        |      |      |   |
| ATOM | 3221 | 0  | WAT | 1886 | 29.070 | 46.538 | 29.760 | 0.00 | 0.00 | 0 |
| ATOM | 3222 | H1 | WAT | 1886 | 29.566 | 47.300 | 30.060 | 0.00 | 0.00 | H |
| ATOM | 3223 | H2 | WAT | 1886 | 28.599 | 46.849 | 28.986 | 0.00 | 0.00 | H |
| TER  | 3224 |    | WAT | 1886 |        |        |        |      |      |   |
| ATOM | 3225 | 0  | WAT | 1941 | 24.890 | 30.427 | 25.582 | 0.00 | 0.00 | 0 |
| ATOM | 3226 | H1 | WAT | 1941 | 25.513 | 30.628 | 26.280 | 0.00 | 0.00 | H |
| ATOM | 3227 | H2 | WAT | 1941 | 24.249 | 31.137 | 25.622 | 0.00 | 0.00 | H |
| TER  | 3228 |    | WAT | 1941 |        |        |        |      |      |   |
| ATOM | 3229 | 0  | WAT | 1959 | 27.120 | 62.190 | 16.713 | 0.00 | 0.00 | 0 |
| ATOM | 3230 | H1 | WAT | 1959 | 27.798 | 61.573 | 16.987 | 0.00 | 0.00 | H |
| ATOM | 3231 | H2 | WAT | 1959 | 26.429 | 62.094 | 17.367 | 0.00 | 0.00 | H |
| TER  | 3232 |    | WAT | 1959 |        |        |        |      |      |   |
| ATOM | 3233 | 0  | WAT | 2049 | 14.140 | 32.161 | 8.623  | 0.00 | 0.00 | 0 |
| ATOM | 3234 | H1 | WAT | 2049 | 14.747 | 31.992 | 7.902  | 0.00 | 0.00 | H |
| ATOM | 3235 | H2 | WAT | 2049 | 14.676 | 32.078 | 9.411  | 0.00 | 0.00 | H |
| TER  | 3236 |    | WAT | 2049 |        |        |        |      |      |   |
| ATOM | 3237 | 0  | WAT | 2067 | 43.277 | 43.766 | 25.101 | 0.00 | 0.00 | 0 |
| ATOM | 3238 | H1 | WAT | 2067 | 43.053 | 42.982 | 25.603 | 0.00 | 0.00 | H |
| ATOM | 3239 | H2 | WAT | 2067 | 43.694 | 43.429 | 24.307 | 0.00 | 0.00 | H |
| TER  | 3240 |    | WAT | 2067 |        |        |        |      |      |   |
| ATOM | 3241 | 0  | WAT | 2122 | 25.618 | 60.993 | 14.600 | 0.00 | 0.00 | 0 |
| ATOM | 3242 | H1 | WAT | 2122 | 25.249 | 61.662 | 14.022 | 0.00 | 0.00 | H |
| ATOM | 3243 | H2 | WAT | 2122 | 26.542 | 60.947 | 14.354 | 0.00 | 0.00 | H |
| TER  | 3244 |    | WAT | 2122 |        |        |        |      |      |   |
| ATOM | 3245 | 0  | WAT | 2183 | 43.124 | 40.799 | 32.073 | 0.00 | 0.00 | 0 |
| ATOM | 3246 | H1 | WAT | 2183 | 42.981 | 41.507 | 32.702 | 0.00 | 0.00 | H |
| ATOM | 3247 | H2 | WAT | 2183 | 42.385 | 40.205 | 32.211 | 0.00 | 0.00 | H |
| TER  | 3248 |    | WAT | 2183 |        |        |        |      |      |   |
| ATOM | 3249 | 0  | WAT | 2209 | 11.838 | 41.242 | 12.011 | 0.00 | 0.00 | 0 |
| ATOM | 3250 | H1 | WAT | 2209 | 12.341 | 41.103 | 12.814 | 0.00 | 0.00 | H |
| ATOM | 3251 | H2 | WAT | 2209 | 12.119 | 40.536 | 11.427 | 0.00 | 0.00 | H |
| TER  | 3252 |    | WAT | 2209 |        |        |        |      |      |   |
| ATOM | 3253 | 0  | WAT | 2222 | 39.964 | 27.231 | 20.837 | 0.00 | 0.00 | 0 |
| ATOM | 3254 | H1 | WAT | 2222 | 39.172 | 27.323 | 21.366 | 0.00 | 0.00 | H |
| ATOM | 3255 | H2 | WAT | 2222 | 40.633 | 26.940 | 21.457 | 0.00 | 0.00 | H |
| TER  | 3256 |    | WAT | 2222 |        |        |        |      |      |   |
| ATOM | 3257 | 0  | WAT | 2228 | 36.240 | 38.622 | 26.474 | 0.00 | 0.00 | 0 |
| ATOM | 3258 | H1 | WAT | 2228 | 37.007 | 38.642 | 27.047 | 0.00 | 0.00 | H |
| ATOM | 3259 | H2 | WAT | 2228 | 36.049 | 39.544 | 26.299 | 0.00 | 0.00 | H |
| TER  | 3260 |    | WAT | 2228 |        |        |        |      |      |   |
| ATOM | 3261 | 0  | WAT | 2314 | 0.026  | 29.689 | 13.261 | 0.00 | 0.00 | 0 |
| ATOM | 3262 | H1 | WAT | 2314 | 0.547  | 29.059 | 13.758 | 0.00 | 0.00 | H |
| ATOM | 3263 | H2 | WAT | 2314 | 0.435  | 30.536 | 13.443 | 0.00 | 0.00 | H |
| TER  | 3264 |    | WAT | 2314 |        |        |        |      |      |   |
| ATOM | 3265 | 0  | WAT | 2458 | 22.417 | 38.518 | 33.300 | 0.00 | 0.00 | 0 |
| ATOM | 3266 | H1 | WAT | 2458 | 22.454 | 39.302 | 32.752 | 0.00 | 0.00 | H |
| ATOM | 3267 | H2 | WAT | 2458 | 21.503 | 38.461 | 33.578 | 0.00 | 0.00 | H |
| TER  | 3268 |    | WAT | 2458 |        |        |        |      |      |   |
| ATOM | 3269 | 0  | WAT | 2489 | 8.036  | 44.014 | 22.918 | 0.00 | 0.00 | 0 |
| ATOM | 3270 | H1 | WAT | 2489 | 8.235  | 44.893 | 23.240 | 0.00 | 0.00 | H |
| ATOM | 3271 | H2 | WAT | 2489 | 8.844  | 43.726 | 22.493 | 0.00 | 0.00 | H |
| TER  | 3272 |    | WAT | 2489 |        |        |        |      |      |   |

|      |      |    |     |      |        |        |        |      |      |   |
|------|------|----|-----|------|--------|--------|--------|------|------|---|
| ATOM | 3273 | O  | WAT | 2590 | 9.345  | 43.975 | 1.672  | 0.00 | 0.00 | O |
| ATOM | 3274 | H1 | WAT | 2590 | 10.138 | 43.482 | 1.462  | 0.00 | 0.00 | H |
| ATOM | 3275 | H2 | WAT | 2590 | 9.499  | 44.310 | 2.555  | 0.00 | 0.00 | H |
| TER  | 3276 |    | WAT | 2590 |        |        |        |      |      |   |
| ATOM | 3277 | O  | WAT | 2595 | 25.435 | 44.902 | 33.034 | 0.00 | 0.00 | O |
| ATOM | 3278 | H1 | WAT | 2595 | 24.698 | 45.495 | 32.891 | 0.00 | 0.00 | H |
| ATOM | 3279 | H2 | WAT | 2595 | 26.210 | 45.439 | 32.865 | 0.00 | 0.00 | H |
| TER  | 3280 |    | WAT | 2595 |        |        |        |      |      |   |
| ATOM | 3281 | O  | WAT | 2607 | 40.774 | 44.171 | 13.108 | 0.00 | 0.00 | O |
| ATOM | 3282 | H1 | WAT | 2607 | 41.562 | 43.902 | 13.581 | 0.00 | 0.00 | H |
| ATOM | 3283 | H2 | WAT | 2607 | 40.584 | 45.049 | 13.438 | 0.00 | 0.00 | H |
| TER  | 3284 |    | WAT | 2607 |        |        |        |      |      |   |
| ATOM | 3285 | O  | WAT | 2611 | 25.699 | 26.348 | 18.148 | 0.00 | 0.00 | O |
| ATOM | 3286 | H1 | WAT | 2611 | 25.392 | 26.521 | 19.038 | 0.00 | 0.00 | H |
| ATOM | 3287 | H2 | WAT | 2611 | 25.473 | 25.432 | 17.991 | 0.00 | 0.00 | H |
| TER  | 3288 |    | WAT | 2611 |        |        |        |      |      |   |
| ATOM | 3289 | O  | WAT | 2627 | 47.217 | 35.841 | 21.906 | 0.00 | 0.00 | O |
| ATOM | 3290 | H1 | WAT | 2627 | 47.175 | 35.562 | 20.991 | 0.00 | 0.00 | H |
| ATOM | 3291 | H2 | WAT | 2627 | 46.690 | 35.196 | 22.378 | 0.00 | 0.00 | H |
| TER  | 3292 |    | WAT | 2627 |        |        |        |      |      |   |
| ATOM | 3293 | O  | WAT | 2636 | 20.273 | 29.843 | 7.918  | 0.00 | 0.00 | O |
| ATOM | 3294 | H1 | WAT | 2636 | 19.639 | 29.176 | 7.654  | 0.00 | 0.00 | H |
| ATOM | 3295 | H2 | WAT | 2636 | 20.476 | 29.632 | 8.829  | 0.00 | 0.00 | H |
| ATOM | 3296 | O  | WAT | 2637 | 12.456 | 44.502 | 3.635  | 0.00 | 0.00 | O |
| ATOM | 3297 | H1 | WAT | 2637 | 11.770 | 44.928 | 4.149  | 0.00 | 0.00 | H |
| ATOM | 3298 | H2 | WAT | 2637 | 12.067 | 44.381 | 2.768  | 0.00 | 0.00 | H |
| TER  | 3299 |    | WAT | 2637 |        |        |        |      |      |   |
| ATOM | 3300 | O  | WAT | 2655 | 36.492 | 40.646 | 11.032 | 0.00 | 0.00 | O |
| ATOM | 3301 | H1 | WAT | 2655 | 36.401 | 39.718 | 10.819 | 0.00 | 0.00 | H |
| ATOM | 3302 | H2 | WAT | 2655 | 36.564 | 41.082 | 10.183 | 0.00 | 0.00 | H |
| TER  | 3303 |    | WAT | 2655 |        |        |        |      |      |   |
| ATOM | 3304 | O  | WAT | 2686 | 28.172 | 62.568 | 12.447 | 0.00 | 0.00 | O |
| ATOM | 3305 | H1 | WAT | 2686 | 28.810 | 62.926 | 11.830 | 0.00 | 0.00 | H |
| ATOM | 3306 | H2 | WAT | 2686 | 28.323 | 61.624 | 12.425 | 0.00 | 0.00 | H |
| TER  | 3307 |    | WAT | 2686 |        |        |        |      |      |   |
| ATOM | 3308 | O  | WAT | 2724 | 37.665 | 42.561 | 40.159 | 0.00 | 0.00 | O |
| ATOM | 3309 | H1 | WAT | 2724 | 37.654 | 41.693 | 39.755 | 0.00 | 0.00 | H |
| ATOM | 3310 | H2 | WAT | 2724 | 37.233 | 43.128 | 39.519 | 0.00 | 0.00 | H |
| TER  | 3311 |    | WAT | 2724 |        |        |        |      |      |   |
| ATOM | 3312 | O  | WAT | 2726 | 37.685 | 55.962 | 20.442 | 0.00 | 0.00 | O |
| ATOM | 3313 | H1 | WAT | 2726 | 37.493 | 55.089 | 20.101 | 0.00 | 0.00 | H |
| ATOM | 3314 | H2 | WAT | 2726 | 38.538 | 55.873 | 20.864 | 0.00 | 0.00 | H |
| TER  | 3315 |    | WAT | 2726 |        |        |        |      |      |   |
| ATOM | 3316 | O  | WAT | 2731 | 32.879 | 21.294 | 16.318 | 0.00 | 0.00 | O |
| ATOM | 3317 | H1 | WAT | 2731 | 32.435 | 21.759 | 17.027 | 0.00 | 0.00 | H |
| ATOM | 3318 | H2 | WAT | 2731 | 33.663 | 21.816 | 16.145 | 0.00 | 0.00 | H |
| TER  | 3319 |    | WAT | 2731 |        |        |        |      |      |   |
| ATOM | 3320 | O  | WAT | 2741 | 1.686  | 38.463 | 14.002 | 0.00 | 0.00 | O |
| ATOM | 3321 | H1 | WAT | 2741 | 0.887  | 38.436 | 13.476 | 0.00 | 0.00 | H |
| ATOM | 3322 | H2 | WAT | 2741 | 2.056  | 37.583 | 13.920 | 0.00 | 0.00 | H |
| TER  | 3323 |    | WAT | 2741 |        |        |        |      |      |   |
| ATOM | 3324 | O  | WAT | 2756 | 23.295 | 53.680 | -1.763 | 0.00 | 0.00 | O |
| ATOM | 3325 | H1 | WAT | 2756 | 23.383 | 52.941 | -1.161 | 0.00 | 0.00 | H |
| ATOM | 3326 | H2 | WAT | 2756 | 24.190 | 53.862 | -2.050 | 0.00 | 0.00 | H |
| TER  | 3327 |    | WAT | 2756 |        |        |        |      |      |   |
| ATOM | 3328 | O  | WAT | 2764 | 32.601 | 60.235 | 6.955  | 0.00 | 0.00 | O |
| ATOM | 3329 | H1 | WAT | 2764 | 32.578 | 60.522 | 7.867  | 0.00 | 0.00 | H |
| ATOM | 3330 | H2 | WAT | 2764 | 31.887 | 59.601 | 6.884  | 0.00 | 0.00 | H |
| TER  | 3331 |    | WAT | 2764 |        |        |        |      |      |   |
| ATOM | 3332 | O  | WAT | 2781 | 41.562 | 42.696 | 33.494 | 0.00 | 0.00 | O |
| ATOM | 3333 | H1 | WAT | 2781 | 41.636 | 42.749 | 34.446 | 0.00 | 0.00 | H |
| ATOM | 3334 | H2 | WAT | 2781 | 40.736 | 43.135 | 33.292 | 0.00 | 0.00 | H |
| TER  | 3335 |    | WAT | 2781 |        |        |        |      |      |   |
| ATOM | 3336 | O  | WAT | 2855 | 29.437 | 33.130 | 40.605 | 0.00 | 0.00 | O |
| ATOM | 3337 | H1 | WAT | 2855 | 29.642 | 33.902 | 40.080 | 0.00 | 0.00 | H |
| ATOM | 3338 | H2 | WAT | 2855 | 29.025 | 33.480 | 41.395 | 0.00 | 0.00 | H |
| TER  | 3339 |    | WAT | 2855 |        |        |        |      |      |   |
| ATOM | 3340 | O  | WAT | 2860 | 34.300 | 59.391 | 23.258 | 0.00 | 0.00 | O |
| ATOM | 3341 | H1 | WAT | 2860 | 35.155 | 59.312 | 22.834 | 0.00 | 0.00 | H |
| ATOM | 3342 | H2 | WAT | 2860 | 33.755 | 59.842 | 22.614 | 0.00 | 0.00 | H |
| TER  | 3343 |    | WAT | 2860 |        |        |        |      |      |   |
| ATOM | 3344 | O  | WAT | 2893 | 15.048 | 43.603 | 4.647  | 0.00 | 0.00 | O |
| ATOM | 3345 | H1 | WAT | 2893 | 14.745 | 44.096 | 3.885  | 0.00 | 0.00 | H |
| ATOM | 3346 | H2 | WAT | 2893 | 14.355 | 43.716 | 5.298  | 0.00 | 0.00 | H |
| TER  | 3347 |    | WAT | 2893 |        |        |        |      |      |   |
| ATOM | 3348 | O  | WAT | 2916 | 24.304 | 44.055 | 35.382 | 0.00 | 0.00 | O |
| ATOM | 3349 | H1 | WAT | 2916 | 24.826 | 43.413 | 35.862 | 0.00 | 0.00 | H |
| ATOM | 3350 | H2 | WAT | 2916 | 24.836 | 44.269 | 34.614 | 0.00 | 0.00 | H |
| TER  | 3351 |    | WAT | 2916 |        |        |        |      |      |   |
| ATOM | 3352 | O  | WAT | 2935 | 23.887 | 58.918 | 15.049 | 0.00 | 0.00 | O |
| ATOM | 3353 | H1 | WAT | 2935 | 24.467 | 59.591 | 14.692 | 0.00 | 0.00 | H |
| ATOM | 3354 | H2 | WAT | 2935 | 24.408 | 58.487 | 15.725 | 0.00 | 0.00 | H |
| TER  | 3355 |    | WAT | 2935 |        |        |        |      |      |   |
| ATOM | 3356 | O  | WAT | 2954 | 10.265 | 36.018 | 28.152 | 0.00 | 0.00 | O |
| ATOM | 3357 | H1 | WAT | 2954 | 10.415 | 36.958 | 28.056 | 0.00 | 0.00 | H |
| ATOM | 3358 | H2 | WAT | 2954 | 11.115 | 35.619 | 27.967 | 0.00 | 0.00 | H |
| TER  | 3359 |    | WAT | 2954 |        |        |        |      |      |   |
| ATOM | 3360 | O  | WAT | 3014 | 6.505  | 47.633 | 28.308 | 0.00 | 0.00 | O |
| ATOM | 3361 | H1 | WAT | 3014 | 6.350  | 46.700 | 28.457 | 0.00 | 0.00 | H |
| ATOM | 3362 | H2 | WAT | 3014 | 7.231  | 47.659 | 27.685 | 0.00 | 0.00 | H |
| TER  | 3363 |    | WAT | 3014 |        |        |        |      |      |   |
| ATOM | 3364 | O  | WAT | 3058 | 23.348 | 62.960 | 6.390  | 0.00 | 0.00 | O |
| ATOM | 3365 | H1 | WAT | 3058 | 23.150 | 62.246 | 6.996  | 0.00 | 0.00 | H |
| ATOM | 3366 | H2 | WAT | 3058 | 23.904 | 62.558 | 5.722  | 0.00 | 0.00 | H |
| TER  | 3367 |    | WAT | 3058 |        |        |        |      |      |   |
| ATOM | 3368 | O  | WAT | 3117 | 6.352  | 37.794 | 25.161 | 0.00 | 0.00 | O |
| ATOM | 3369 | H1 | WAT | 3117 | 5.944  | 38.052 | 24.334 | 0.00 | 0.00 | H |
| ATOM | 3370 | H2 | WAT | 3117 | 7.208  | 37.447 | 24.907 | 0.00 | 0.00 | H |
| TER  | 3371 |    | WAT | 3117 |        |        |        |      |      |   |
| ATOM | 3372 | O  | WAT | 3124 | 41.138 | 52.195 | 15.278 | 0.00 | 0.00 | O |
| ATOM | 3373 | H1 | WAT | 3124 | 41.319 | 52.834 | 14.588 | 0.00 | 0.00 | H |
| ATOM | 3374 | H2 | WAT | 3124 | 41.469 | 51.366 | 14.931 | 0.00 | 0.00 | H |
| TER  | 3375 |    | WAT | 3124 |        |        |        |      |      |   |
| ATOM | 3376 | O  | WAT | 3133 | 10.085 | 40.605 | 24.330 | 0.00 | 0.00 | O |
| ATOM | 3377 | H1 | WAT | 3133 | 10.631 | 39.894 | 24.664 | 0.00 | 0.00 | H |

|      |      |    |     |      |        |        |        |      |      |   |
|------|------|----|-----|------|--------|--------|--------|------|------|---|
| ATOM | 3378 | H2 | WAT | 3133 | 9.393  | 40.165 | 23.836 | 0.00 | 0.00 | H |
| TER  | 3379 |    | WAT | 3133 |        |        |        |      |      |   |
| ATOM | 3380 | O  | WAT | 3148 | 32.954 | 44.558 | 6.358  | 0.00 | 0.00 | O |
| ATOM | 3381 | H1 | WAT | 3148 | 32.605 | 45.005 | 7.129  | 0.00 | 0.00 | H |
| ATOM | 3382 | H2 | WAT | 3148 | 33.799 | 44.210 | 6.644  | 0.00 | 0.00 | H |
| TER  | 3383 |    | WAT | 3148 |        |        |        |      |      |   |
| ATOM | 3384 | O  | WAT | 3175 | 23.214 | 26.593 | 3.562  | 0.00 | 0.00 | O |
| ATOM | 3385 | H1 | WAT | 3175 | 23.256 | 26.352 | 4.487  | 0.00 | 0.00 | H |
| ATOM | 3386 | H2 | WAT | 3175 | 22.782 | 25.850 | 3.141  | 0.00 | 0.00 | H |
| TER  | 3387 |    | WAT | 3175 |        |        |        |      |      |   |
| ATOM | 3388 | O  | WAT | 3186 | 24.153 | 46.692 | 22.042 | 0.00 | 0.00 | O |
| ATOM | 3389 | H1 | WAT | 3186 | 23.206 | 46.562 | 22.097 | 0.00 | 0.00 | H |
| ATOM | 3390 | H2 | WAT | 3186 | 24.524 | 45.963 | 22.539 | 0.00 | 0.00 | H |
| TER  | 3391 |    | WAT | 3186 |        |        |        |      |      |   |
| ATOM | 3392 | O  | WAT | 3260 | 18.900 | 42.158 | 0.987  | 0.00 | 0.00 | O |
| ATOM | 3393 | H1 | WAT | 3260 | 18.534 | 42.754 | 0.333  | 0.00 | 0.00 | H |
| ATOM | 3394 | H2 | WAT | 3260 | 19.651 | 42.631 | 1.348  | 0.00 | 0.00 | H |
| TER  | 3395 |    | WAT | 3260 |        |        |        |      |      |   |
| ATOM | 3396 | O  | WAT | 3285 | 22.230 | 27.465 | 17.041 | 0.00 | 0.00 | O |
| ATOM | 3397 | H1 | WAT | 3285 | 21.875 | 26.601 | 17.247 | 0.00 | 0.00 | H |
| ATOM | 3398 | H2 | WAT | 3285 | 22.383 | 27.442 | 16.097 | 0.00 | 0.00 | H |
| TER  | 3399 |    | WAT | 3285 |        |        |        |      |      |   |
| ATOM | 3400 | O  | WAT | 3295 | 2.820  | 41.133 | 13.828 | 0.00 | 0.00 | O |
| ATOM | 3401 | H1 | WAT | 3295 | 2.630  | 40.198 | 13.745 | 0.00 | 0.00 | H |
| ATOM | 3402 | H2 | WAT | 3295 | 2.802  | 41.298 | 14.771 | 0.00 | 0.00 | H |
| TER  | 3403 |    | WAT | 3295 |        |        |        |      |      |   |
| ATOM | 3404 | O  | WAT | 3298 | 34.805 | 61.901 | 15.348 | 0.00 | 0.00 | O |
| ATOM | 3405 | H1 | WAT | 3298 | 35.461 | 61.698 | 14.682 | 0.00 | 0.00 | H |
| ATOM | 3406 | H2 | WAT | 3298 | 34.191 | 61.167 | 15.311 | 0.00 | 0.00 | H |
| TER  | 3407 |    | WAT | 3298 |        |        |        |      |      |   |
| ATOM | 3408 | O  | WAT | 3306 | 13.559 | 40.295 | 32.368 | 0.00 | 0.00 | O |
| ATOM | 3409 | H1 | WAT | 3306 | 13.173 | 41.077 | 32.760 | 0.00 | 0.00 | H |
| ATOM | 3410 | H2 | WAT | 3306 | 12.837 | 39.888 | 31.887 | 0.00 | 0.00 | H |
| TER  | 3411 |    | WAT | 3306 |        |        |        |      |      |   |
| ATOM | 3412 | O  | WAT | 3312 | 6.356  | 48.268 | 7.933  | 0.00 | 0.00 | O |
| ATOM | 3413 | H1 | WAT | 3312 | 5.761  | 47.842 | 7.316  | 0.00 | 0.00 | H |
| ATOM | 3414 | H2 | WAT | 3312 | 7.197  | 48.291 | 7.476  | 0.00 | 0.00 | H |
| TER  | 3415 |    | WAT | 3312 |        |        |        |      |      |   |
| ATOM | 3416 | O  | WAT | 3317 | 3.797  | 42.268 | 20.430 | 0.00 | 0.00 | O |
| ATOM | 3417 | H1 | WAT | 3317 | 4.029  | 41.340 | 20.375 | 0.00 | 0.00 | H |
| ATOM | 3418 | H2 | WAT | 3317 | 4.435  | 42.639 | 21.039 | 0.00 | 0.00 | H |
| TER  | 3419 |    | WAT | 3317 |        |        |        |      |      |   |
| ATOM | 3420 | O  | WAT | 3333 | 23.396 | 60.132 | 21.469 | 0.00 | 0.00 | O |
| ATOM | 3421 | H1 | WAT | 3333 | 24.115 | 60.529 | 20.978 | 0.00 | 0.00 | H |
| ATOM | 3422 | H2 | WAT | 3333 | 22.622 | 60.627 | 21.202 | 0.00 | 0.00 | H |
| TER  | 3423 |    | WAT | 3333 |        |        |        |      |      |   |
| ATOM | 3424 | O  | WAT | 3347 | 10.749 | 42.150 | 30.911 | 0.00 | 0.00 | O |
| ATOM | 3425 | H1 | WAT | 3347 | 10.084 | 41.476 | 30.777 | 0.00 | 0.00 | H |
| ATOM | 3426 | H2 | WAT | 3347 | 11.558 | 41.758 | 30.582 | 0.00 | 0.00 | H |
| TER  | 3427 |    | WAT | 3347 |        |        |        |      |      |   |
| ATOM | 3428 | O  | WAT | 3353 | 32.028 | 63.926 | 22.732 | 0.00 | 0.00 | O |
| ATOM | 3429 | H1 | WAT | 3353 | 31.963 | 64.625 | 22.080 | 0.00 | 0.00 | H |
| ATOM | 3430 | H2 | WAT | 3353 | 32.964 | 63.866 | 22.926 | 0.00 | 0.00 | H |
| TER  | 3431 |    | WAT | 3353 |        |        |        |      |      |   |
| ATOM | 3432 | O  | WAT | 3364 | 29.239 | 52.537 | -2.453 | 0.00 | 0.00 | O |
| ATOM | 3433 | H1 | WAT | 3364 | 29.305 | 51.592 | -2.590 | 0.00 | 0.00 | H |
| ATOM | 3434 | H2 | WAT | 3364 | 28.333 | 52.677 | -2.182 | 0.00 | 0.00 | H |
| TER  | 3435 |    | WAT | 3364 |        |        |        |      |      |   |
| ATOM | 3436 | O  | WAT | 3366 | 32.140 | 60.538 | 9.697  | 0.00 | 0.00 | O |
| ATOM | 3437 | H1 | WAT | 3366 | 31.889 | 59.747 | 10.174 | 0.00 | 0.00 | H |
| ATOM | 3438 | H2 | WAT | 3366 | 32.418 | 61.150 | 10.377 | 0.00 | 0.00 | H |
| TER  | 3439 |    | WAT | 3366 |        |        |        |      |      |   |
| ATOM | 3440 | O  | WAT | 3376 | 8.908  | 40.569 | 29.586 | 0.00 | 0.00 | O |
| ATOM | 3441 | H1 | WAT | 3376 | 8.908  | 41.191 | 28.859 | 0.00 | 0.00 | H |
| ATOM | 3442 | H2 | WAT | 3376 | 9.355  | 39.797 | 29.239 | 0.00 | 0.00 | H |
| TER  | 3443 |    | WAT | 3376 |        |        |        |      |      |   |
| ATOM | 3444 | O  | WAT | 3404 | 24.308 | 37.894 | 6.543  | 0.00 | 0.00 | O |
| ATOM | 3445 | H1 | WAT | 3404 | 24.047 | 37.257 | 7.208  | 0.00 | 0.00 | H |
| ATOM | 3446 | H2 | WAT | 3404 | 24.736 | 38.594 | 7.037  | 0.00 | 0.00 | H |
| ATOM | 3447 | O  | WAT | 3405 | 24.354 | 39.687 | 35.688 | 0.00 | 0.00 | O |
| ATOM | 3448 | H1 | WAT | 3405 | 24.194 | 39.356 | 34.804 | 0.00 | 0.00 | H |
| ATOM | 3449 | H2 | WAT | 3405 | 25.302 | 39.617 | 35.800 | 0.00 | 0.00 | H |
| TER  | 3450 |    | WAT | 3405 |        |        |        |      |      |   |
| ATOM | 3451 | O  | WAT | 3520 | 39.863 | 46.827 | 35.903 | 0.00 | 0.00 | O |
| ATOM | 3452 | H1 | WAT | 3520 | 40.652 | 46.505 | 35.467 | 0.00 | 0.00 | H |
| ATOM | 3453 | H2 | WAT | 3520 | 39.414 | 46.036 | 36.201 | 0.00 | 0.00 | H |
| TER  | 3454 |    | WAT | 3520 |        |        |        |      |      |   |
| ATOM | 3455 | O  | WAT | 3541 | 1.649  | 42.139 | 18.973 | 0.00 | 0.00 | O |
| ATOM | 3456 | H1 | WAT | 3541 | 1.955  | 42.539 | 18.159 | 0.00 | 0.00 | H |
| ATOM | 3457 | H2 | WAT | 3541 | 2.433  | 42.082 | 19.521 | 0.00 | 0.00 | H |
| TER  | 3458 |    | WAT | 3541 |        |        |        |      |      |   |
| ATOM | 3459 | O  | WAT | 3545 | 25.256 | 45.913 | -1.422 | 0.00 | 0.00 | O |
| ATOM | 3460 | H1 | WAT | 3545 | 24.387 | 45.616 | -1.686 | 0.00 | 0.00 | H |
| ATOM | 3461 | H2 | WAT | 3545 | 25.111 | 46.790 | -1.065 | 0.00 | 0.00 | H |
| TER  | 3462 |    | WAT | 3545 |        |        |        |      |      |   |
| ATOM | 3463 | O  | WAT | 3586 | 30.961 | 57.565 | 17.483 | 0.00 | 0.00 | O |
| ATOM | 3464 | H1 | WAT | 3586 | 31.415 | 57.541 | 18.325 | 0.00 | 0.00 | H |
| ATOM | 3465 | H2 | WAT | 3586 | 31.338 | 56.838 | 16.987 | 0.00 | 0.00 | H |
| TER  | 3466 |    | WAT | 3586 |        |        |        |      |      |   |
| ATOM | 3467 | O  | WAT | 3613 | 30.006 | 36.699 | 29.699 | 0.00 | 0.00 | O |
| ATOM | 3468 | H1 | WAT | 3613 | 29.317 | 37.324 | 29.476 | 0.00 | 0.00 | H |
| ATOM | 3469 | H2 | WAT | 3613 | 29.709 | 36.296 | 30.515 | 0.00 | 0.00 | H |
| TER  | 3470 |    | WAT | 3613 |        |        |        |      |      |   |
| ATOM | 3471 | O  | WAT | 3617 | 29.772 | 63.223 | 27.518 | 0.00 | 0.00 | O |
| ATOM | 3472 | H1 | WAT | 3617 | 29.655 | 62.926 | 26.616 | 0.00 | 0.00 | H |
| ATOM | 3473 | H2 | WAT | 3617 | 28.926 | 63.060 | 27.935 | 0.00 | 0.00 | H |
| TER  | 3474 |    | WAT | 3617 |        |        |        |      |      |   |
| ATOM | 3475 | O  | WAT | 3708 | 22.825 | 65.362 | 26.553 | 0.00 | 0.00 | O |
| ATOM | 3476 | H1 | WAT | 3708 | 22.497 | 64.651 | 27.103 | 0.00 | 0.00 | H |
| ATOM | 3477 | H2 | WAT | 3708 | 23.774 | 65.338 | 26.672 | 0.00 | 0.00 | H |
| TER  | 3478 |    | WAT | 3708 |        |        |        |      |      |   |
| ATOM | 3479 | O  | WAT | 3725 | 44.804 | 38.048 | 32.963 | 0.00 | 0.00 | O |
| ATOM | 3480 | H1 | WAT | 3725 | 43.929 | 38.108 | 33.345 | 0.00 | 0.00 | H |
| ATOM | 3481 | H2 | WAT | 3725 | 45.247 | 38.846 | 33.252 | 0.00 | 0.00 | H |
| TER  | 3482 |    | WAT | 3725 |        |        |        |      |      |   |

|      |      |    |     |      |        |        |        |      |      |   |
|------|------|----|-----|------|--------|--------|--------|------|------|---|
| ATOM | 3483 | 0  | WAT | 3745 | -1.604 | 37.383 | 15.063 | 0.00 | 0.00 | 0 |
| ATOM | 3484 | H1 | WAT | 3745 | -1.538 | 37.403 | 14.108 | 0.00 | 0.00 | H |
| ATOM | 3485 | H2 | WAT | 3745 | -1.947 | 36.512 | 15.261 | 0.00 | 0.00 | H |
| TER  | 3486 |    | WAT | 3745 |        |        |        |      |      |   |
| ATOM | 3487 | 0  | WAT | 3747 | 32.244 | 22.287 | 18.869 | 0.00 | 0.00 | 0 |
| ATOM | 3488 | H1 | WAT | 3747 | 31.351 | 22.496 | 19.142 | 0.00 | 0.00 | H |
| ATOM | 3489 | H2 | WAT | 3747 | 32.522 | 21.595 | 19.469 | 0.00 | 0.00 | H |
| TER  | 3490 |    | WAT | 3747 |        |        |        |      |      |   |
| ATOM | 3491 | 0  | WAT | 3755 | 7.920  | 29.311 | 25.999 | 0.00 | 0.00 | 0 |
| ATOM | 3492 | H1 | WAT | 3755 | 8.092  | 30.044 | 25.408 | 0.00 | 0.00 | H |
| ATOM | 3493 | H2 | WAT | 3755 | 7.107  | 28.925 | 25.671 | 0.00 | 0.00 | H |
| TER  | 3494 |    | WAT | 3755 |        |        |        |      |      |   |
| ATOM | 3495 | 0  | WAT | 3778 | 20.619 | 56.102 | 27.956 | 0.00 | 0.00 | 0 |
| ATOM | 3496 | H1 | WAT | 3778 | 21.066 | 56.679 | 28.575 | 0.00 | 0.00 | H |
| ATOM | 3497 | H2 | WAT | 3778 | 19.706 | 56.389 | 27.977 | 0.00 | 0.00 | H |
| TER  | 3498 |    | WAT | 3778 |        |        |        |      |      |   |
| ATOM | 3499 | 0  | WAT | 3840 | 30.037 | 33.937 | 7.839  | 0.00 | 0.00 | 0 |
| ATOM | 3500 | H1 | WAT | 3840 | 29.633 | 34.643 | 7.335  | 0.00 | 0.00 | H |
| ATOM | 3501 | H2 | WAT | 3840 | 30.206 | 34.322 | 8.699  | 0.00 | 0.00 | H |
| TER  | 3502 |    | WAT | 3840 |        |        |        |      |      |   |
| ATOM | 3503 | 0  | WAT | 3862 | 19.833 | 23.930 | 8.057  | 0.00 | 0.00 | 0 |
| ATOM | 3504 | H1 | WAT | 3862 | 19.845 | 23.209 | 8.687  | 0.00 | 0.00 | H |
| ATOM | 3505 | H2 | WAT | 3862 | 20.751 | 24.061 | 7.824  | 0.00 | 0.00 | H |
| TER  | 3506 |    | WAT | 3862 |        |        |        |      |      |   |
| ATOM | 3507 | 0  | WAT | 3904 | 32.110 | 30.971 | 27.527 | 0.00 | 0.00 | 0 |
| ATOM | 3508 | H1 | WAT | 3904 | 31.852 | 31.101 | 28.440 | 0.00 | 0.00 | H |
| ATOM | 3509 | H2 | WAT | 3904 | 31.584 | 30.227 | 27.233 | 0.00 | 0.00 | H |
| TER  | 3510 |    | WAT | 3904 |        |        |        |      |      |   |
| ATOM | 3511 | 0  | WAT | 3907 | 23.634 | 49.526 | 3.715  | 0.00 | 0.00 | 0 |
| ATOM | 3512 | H1 | WAT | 3907 | 23.937 | 49.996 | 2.938  | 0.00 | 0.00 | H |
| ATOM | 3513 | H2 | WAT | 3907 | 23.382 | 48.662 | 3.390  | 0.00 | 0.00 | H |
| TER  | 3514 |    | WAT | 3907 |        |        |        |      |      |   |
| ATOM | 3515 | 0  | WAT | 3930 | 6.302  | 42.215 | 8.518  | 0.00 | 0.00 | 0 |
| ATOM | 3516 | H1 | WAT | 3930 | 6.467  | 41.319 | 8.809  | 0.00 | 0.00 | H |
| ATOM | 3517 | H2 | WAT | 3930 | 7.001  | 42.395 | 7.889  | 0.00 | 0.00 | H |
| TER  | 3518 |    | WAT | 3930 |        |        |        |      |      |   |
| ATOM | 3519 | 0  | WAT | 3939 | 18.170 | 63.852 | 25.417 | 0.00 | 0.00 | 0 |
| ATOM | 3520 | H1 | WAT | 3939 | 17.498 | 63.170 | 25.423 | 0.00 | 0.00 | H |
| ATOM | 3521 | H2 | WAT | 3939 | 18.946 | 63.420 | 25.058 | 0.00 | 0.00 | H |
| TER  | 3522 |    | WAT | 3939 |        |        |        |      |      |   |
| ATOM | 3523 | 0  | WAT | 3986 | 7.210  | 48.867 | 24.569 | 0.00 | 0.00 | 0 |
| ATOM | 3524 | H1 | WAT | 3986 | 8.015  | 49.030 | 24.076 | 0.00 | 0.00 | H |
| ATOM | 3525 | H2 | WAT | 3986 | 7.496  | 48.811 | 25.481 | 0.00 | 0.00 | H |
| TER  | 3526 |    | WAT | 3986 |        |        |        |      |      |   |
| ATOM | 3527 | 0  | WAT | 4011 | 24.860 | 51.307 | 33.798 | 0.00 | 0.00 | 0 |
| ATOM | 3528 | H1 | WAT | 4011 | 25.377 | 50.536 | 33.568 | 0.00 | 0.00 | H |
| ATOM | 3529 | H2 | WAT | 4011 | 23.977 | 51.107 | 33.487 | 0.00 | 0.00 | H |
| TER  | 3530 |    | WAT | 4011 |        |        |        |      |      |   |
| ATOM | 3531 | 0  | WAT | 4028 | 15.819 | 28.678 | 13.180 | 0.00 | 0.00 | 0 |
| ATOM | 3532 | H1 | WAT | 4028 | 16.704 | 28.419 | 13.438 | 0.00 | 0.00 | H |
| ATOM | 3533 | H2 | WAT | 4028 | 15.613 | 28.119 | 12.431 | 0.00 | 0.00 | H |
| TER  | 3534 |    | WAT | 4028 |        |        |        |      |      |   |
| ATOM | 3535 | 0  | WAT | 4161 | 32.252 | 56.750 | 19.711 | 0.00 | 0.00 | 0 |
| ATOM | 3536 | H1 | WAT | 4161 | 33.164 | 56.512 | 19.546 | 0.00 | 0.00 | H |
| ATOM | 3537 | H2 | WAT | 4161 | 32.158 | 56.692 | 20.662 | 0.00 | 0.00 | H |
| TER  | 3538 |    | WAT | 4161 |        |        |        |      |      |   |
| ATOM | 3539 | 0  | WAT | 4175 | 3.869  | 39.203 | 21.257 | 0.00 | 0.00 | 0 |
| ATOM | 3540 | H1 | WAT | 4175 | 4.776  | 39.046 | 21.519 | 0.00 | 0.00 | H |
| ATOM | 3541 | H2 | WAT | 4175 | 3.378  | 39.195 | 22.079 | 0.00 | 0.00 | H |
| TER  | 3542 |    | WAT | 4175 |        |        |        |      |      |   |
| ATOM | 3543 | 0  | WAT | 4182 | 34.930 | 45.581 | 32.983 | 0.00 | 0.00 | 0 |
| ATOM | 3544 | H1 | WAT | 4182 | 34.097 | 45.537 | 33.452 | 0.00 | 0.00 | H |
| ATOM | 3545 | H2 | WAT | 4182 | 35.593 | 45.592 | 33.673 | 0.00 | 0.00 | H |
| TER  | 3546 |    | WAT | 4182 |        |        |        |      |      |   |
| ATOM | 3547 | 0  | WAT | 4187 | 30.052 | 40.995 | 3.001  | 0.00 | 0.00 | 0 |
| ATOM | 3548 | H1 | WAT | 4187 | 29.861 | 41.390 | 2.151  | 0.00 | 0.00 | H |
| ATOM | 3549 | H2 | WAT | 4187 | 29.361 | 40.345 | 3.124  | 0.00 | 0.00 | H |
| TER  | 3550 |    | WAT | 4187 |        |        |        |      |      |   |
| ATOM | 3551 | 0  | WAT | 4195 | 9.017  | 42.226 | 4.211  | 0.00 | 0.00 | 0 |
| ATOM | 3552 | H1 | WAT | 4195 | 9.066  | 43.128 | 4.527  | 0.00 | 0.00 | H |
| ATOM | 3553 | H2 | WAT | 4195 | 8.312  | 42.237 | 3.563  | 0.00 | 0.00 | H |
| TER  | 3554 |    | WAT | 4195 |        |        |        |      |      |   |
| ATOM | 3555 | 0  | WAT | 4216 | 3.436  | 29.214 | 12.493 | 0.00 | 0.00 | 0 |
| ATOM | 3556 | H1 | WAT | 4216 | 4.087  | 28.623 | 12.873 | 0.00 | 0.00 | H |
| ATOM | 3557 | H2 | WAT | 4216 | 3.863  | 30.071 | 12.491 | 0.00 | 0.00 | H |
| TER  | 3558 |    | WAT | 4216 |        |        |        |      |      |   |
| ATOM | 3559 | 0  | WAT | 4228 | 25.308 | 61.453 | 19.715 | 0.00 | 0.00 | 0 |
| ATOM | 3560 | H1 | WAT | 4228 | 26.224 | 61.179 | 19.774 | 0.00 | 0.00 | H |
| ATOM | 3561 | H2 | WAT | 4228 | 25.013 | 61.124 | 18.866 | 0.00 | 0.00 | H |
| TER  | 3562 |    | WAT | 4228 |        |        |        |      |      |   |
| ATOM | 3563 | 0  | WAT | 4259 | 20.890 | 39.698 | 2.968  | 0.00 | 0.00 | 0 |
| ATOM | 3564 | H1 | WAT | 4259 | 21.290 | 39.647 | 2.100  | 0.00 | 0.00 | H |
| ATOM | 3565 | H2 | WAT | 4259 | 21.632 | 39.739 | 3.571  | 0.00 | 0.00 | H |
| TER  | 3566 |    | WAT | 4259 |        |        |        |      |      |   |
| ATOM | 3567 | 0  | WAT | 4274 | 18.448 | 27.729 | 7.114  | 0.00 | 0.00 | 0 |
| ATOM | 3568 | H1 | WAT | 4274 | 17.819 | 27.534 | 7.808  | 0.00 | 0.00 | H |
| ATOM | 3569 | H2 | WAT | 4274 | 18.180 | 27.170 | 6.385  | 0.00 | 0.00 | H |
| TER  | 3570 |    | WAT | 4274 |        |        |        |      |      |   |
| ATOM | 3571 | 0  | WAT | 4296 | 20.083 | 58.906 | 0.303  | 0.00 | 0.00 | 0 |
| ATOM | 3572 | H1 | WAT | 4296 | 20.788 | 59.418 | -0.093 | 0.00 | 0.00 | H |
| ATOM | 3573 | H2 | WAT | 4296 | 19.460 | 58.765 | -0.410 | 0.00 | 0.00 | H |
| TER  | 3574 |    | WAT | 4296 |        |        |        |      |      |   |
| ATOM | 3575 | 0  | WAT | 4317 | 13.575 | 45.321 | 8.104  | 0.00 | 0.00 | 0 |
| ATOM | 3576 | H1 | WAT | 4317 | 13.639 | 45.696 | 7.226  | 0.00 | 0.00 | H |
| ATOM | 3577 | H2 | WAT | 4317 | 13.507 | 44.377 | 7.958  | 0.00 | 0.00 | H |
| TER  | 3578 |    | WAT | 4317 |        |        |        |      |      |   |
| ATOM | 3579 | 0  | WAT | 4320 | 22.551 | 54.776 | 30.921 | 0.00 | 0.00 | 0 |
| ATOM | 3580 | H1 | WAT | 4320 | 21.602 | 54.690 | 30.838 | 0.00 | 0.00 | H |
| ATOM | 3581 | H2 | WAT | 4320 | 22.894 | 53.928 | 30.640 | 0.00 | 0.00 | H |
| TER  | 3582 |    | WAT | 4320 |        |        |        |      |      |   |
| ATOM | 3583 | 0  | WAT | 4324 | 36.338 | 43.979 | 5.516  | 0.00 | 0.00 | 0 |
| ATOM | 3584 | H1 | WAT | 4324 | 35.774 | 44.138 | 4.759  | 0.00 | 0.00 | H |
| ATOM | 3585 | H2 | WAT | 4324 | 35.731 | 43.849 | 6.245  | 0.00 | 0.00 | H |
| TER  | 3586 |    | WAT | 4324 |        |        |        |      |      |   |
| ATOM | 3587 | 0  | WAT | 4364 | 29.783 | 22.539 | 24.684 | 0.00 | 0.00 | 0 |

|      |      |    |     |      |        |        |        |      |      |   |
|------|------|----|-----|------|--------|--------|--------|------|------|---|
| ATOM | 3588 | H1 | WAT | 4364 | 29.525 | 22.203 | 23.827 | 0.00 | 0.00 | H |
| ATOM | 3589 | H2 | WAT | 4364 | 29.282 | 23.349 | 24.785 | 0.00 | 0.00 | H |
| TER  | 3590 |    | WAT | 4364 |        |        |        |      |      |   |
| ATOM | 3591 | O  | WAT | 4391 | 12.289 | 49.477 | 30.006 | 0.00 | 0.00 | O |
| ATOM | 3592 | H1 | WAT | 4391 | 11.764 | 49.057 | 29.324 | 0.00 | 0.00 | H |
| ATOM | 3593 | H2 | WAT | 4391 | 12.961 | 49.960 | 29.528 | 0.00 | 0.00 | H |
| TER  | 3594 |    | WAT | 4391 |        |        |        |      |      |   |
| ATOM | 3595 | O  | WAT | 4405 | 26.272 | 49.868 | -1.346 | 0.00 | 0.00 | O |
| ATOM | 3596 | H1 | WAT | 4405 | 26.397 | 49.059 | -0.851 | 0.00 | 0.00 | H |
| ATOM | 3597 | H2 | WAT | 4405 | 27.104 | 50.003 | -1.800 | 0.00 | 0.00 | H |
| TER  | 3598 |    | WAT | 4405 |        |        |        |      |      |   |
| ATOM | 3599 | O  | WAT | 4423 | 43.787 | 37.660 | 19.617 | 0.00 | 0.00 | O |
| ATOM | 3600 | H1 | WAT | 4423 | 43.694 | 36.759 | 19.310 | 0.00 | 0.00 | H |
| ATOM | 3601 | H2 | WAT | 4423 | 42.911 | 38.036 | 19.527 | 0.00 | 0.00 | H |
| TER  | 3602 |    | WAT | 4423 |        |        |        |      |      |   |
| ATOM | 3603 | O  | WAT | 4433 | 37.817 | 51.122 | 1.353  | 0.00 | 0.00 | O |
| ATOM | 3604 | H1 | WAT | 4433 | 38.735 | 50.986 | 1.587  | 0.00 | 0.00 | H |
| ATOM | 3605 | H2 | WAT | 4433 | 37.338 | 50.483 | 1.881  | 0.00 | 0.00 | H |
| TER  | 3606 |    | WAT | 4433 |        |        |        |      |      |   |
| ATOM | 3607 | O  | WAT | 4467 | 20.134 | 36.029 | 27.941 | 0.00 | 0.00 | O |
| ATOM | 3608 | H1 | WAT | 4467 | 20.563 | 36.547 | 28.622 | 0.00 | 0.00 | H |
| ATOM | 3609 | H2 | WAT | 4467 | 19.200 | 36.202 | 28.060 | 0.00 | 0.00 | H |
| TER  | 3610 |    | WAT | 4467 |        |        |        |      |      |   |
| ATOM | 3611 | O  | WAT | 4474 | 22.108 | 35.445 | 30.874 | 0.00 | 0.00 | O |
| ATOM | 3612 | H1 | WAT | 4474 | 21.517 | 34.914 | 31.408 | 0.00 | 0.00 | H |
| ATOM | 3613 | H2 | WAT | 4474 | 21.534 | 36.056 | 30.415 | 0.00 | 0.00 | H |
| TER  | 3614 |    | WAT | 4474 |        |        |        |      |      |   |
| ATOM | 3615 | O  | WAT | 4489 | 25.760 | 48.048 | 36.028 | 0.00 | 0.00 | O |
| ATOM | 3616 | H1 | WAT | 4489 | 26.158 | 48.080 | 35.158 | 0.00 | 0.00 | H |
| ATOM | 3617 | H2 | WAT | 4489 | 26.302 | 48.631 | 36.562 | 0.00 | 0.00 | H |
| TER  | 3618 |    | WAT | 4489 |        |        |        |      |      |   |
| ATOM | 3619 | O  | WAT | 4492 | 30.572 | 35.374 | 41.703 | 0.00 | 0.00 | O |
| ATOM | 3620 | H1 | WAT | 4492 | 31.487 | 35.227 | 41.943 | 0.00 | 0.00 | H |
| ATOM | 3621 | H2 | WAT | 4492 | 30.513 | 35.085 | 40.792 | 0.00 | 0.00 | H |
| TER  | 3622 |    | WAT | 4492 |        |        |        |      |      |   |
| ATOM | 3623 | O  | WAT | 4579 | 18.404 | 21.700 | 20.115 | 0.00 | 0.00 | O |
| ATOM | 3624 | H1 | WAT | 4579 | 17.923 | 22.440 | 19.745 | 0.00 | 0.00 | H |
| ATOM | 3625 | H2 | WAT | 4579 | 18.295 | 20.999 | 19.472 | 0.00 | 0.00 | H |
| TER  | 3626 |    | WAT | 4579 |        |        |        |      |      |   |
| ATOM | 3627 | O  | WAT | 4611 | 15.690 | 27.625 | 6.266  | 0.00 | 0.00 | O |
| ATOM | 3628 | H1 | WAT | 4611 | 15.172 | 28.383 | 5.995  | 0.00 | 0.00 | H |
| ATOM | 3629 | H2 | WAT | 4611 | 15.794 | 27.731 | 7.211  | 0.00 | 0.00 | H |
| TER  | 3630 |    | WAT | 4611 |        |        |        |      |      |   |
| ATOM | 3631 | O  | WAT | 4620 | 41.172 | 49.991 | 13.528 | 0.00 | 0.00 | O |
| ATOM | 3632 | H1 | WAT | 4620 | 41.067 | 49.085 | 13.816 | 0.00 | 0.00 | H |
| ATOM | 3633 | H2 | WAT | 4620 | 40.361 | 50.186 | 13.056 | 0.00 | 0.00 | H |
| TER  | 3634 |    | WAT | 4620 |        |        |        |      |      |   |
| ATOM | 3635 | O  | WAT | 4622 | 35.922 | 53.110 | 6.893  | 0.00 | 0.00 | O |
| ATOM | 3636 | H1 | WAT | 4622 | 36.052 | 52.280 | 6.433  | 0.00 | 0.00 | H |
| ATOM | 3637 | H2 | WAT | 4622 | 35.460 | 52.869 | 7.695  | 0.00 | 0.00 | H |
| TER  | 3638 |    | WAT | 4622 |        |        |        |      |      |   |
| ATOM | 3639 | O  | WAT | 4646 | 8.863  | 36.992 | 24.731 | 0.00 | 0.00 | O |
| ATOM | 3640 | H1 | WAT | 4646 | 9.559  | 37.330 | 25.294 | 0.00 | 0.00 | H |
| ATOM | 3641 | H2 | WAT | 4646 | 8.824  | 37.609 | 24.000 | 0.00 | 0.00 | H |
| TER  | 3642 |    | WAT | 4646 |        |        |        |      |      |   |
| ATOM | 3643 | O  | WAT | 4658 | 31.715 | 46.651 | -0.705 | 0.00 | 0.00 | O |
| ATOM | 3644 | H1 | WAT | 4658 | 31.810 | 46.892 | 0.217  | 0.00 | 0.00 | H |
| ATOM | 3645 | H2 | WAT | 4658 | 31.399 | 47.449 | -1.129 | 0.00 | 0.00 | H |
| TER  | 3646 |    | WAT | 4658 |        |        |        |      |      |   |
| ATOM | 3647 | O  | WAT | 4676 | 19.676 | 59.422 | 6.480  | 0.00 | 0.00 | O |
| ATOM | 3648 | H1 | WAT | 4676 | 20.146 | 59.104 | 5.709  | 0.00 | 0.00 | H |
| ATOM | 3649 | H2 | WAT | 4676 | 20.019 | 58.898 | 7.203  | 0.00 | 0.00 | H |
| TER  | 3650 |    | WAT | 4676 |        |        |        |      |      |   |
| ATOM | 3651 | O  | WAT | 4704 | 14.010 | 18.633 | 16.211 | 0.00 | 0.00 | O |
| ATOM | 3652 | H1 | WAT | 4704 | 13.257 | 18.909 | 16.733 | 0.00 | 0.00 | H |
| ATOM | 3653 | H2 | WAT | 4704 | 13.748 | 18.801 | 15.307 | 0.00 | 0.00 | H |
| TER  | 3654 |    | WAT | 4704 |        |        |        |      |      |   |
| ATOM | 3655 | O  | WAT | 4747 | 47.874 | 32.878 | 21.198 | 0.00 | 0.00 | O |
| ATOM | 3656 | H1 | WAT | 4747 | 48.449 | 32.466 | 21.842 | 0.00 | 0.00 | H |
| ATOM | 3657 | H2 | WAT | 4747 | 47.050 | 32.396 | 21.268 | 0.00 | 0.00 | H |
| TER  | 3658 |    | WAT | 4747 |        |        |        |      |      |   |
| ATOM | 3659 | O  | WAT | 4801 | 38.799 | 33.379 | 14.884 | 0.00 | 0.00 | O |
| ATOM | 3660 | H1 | WAT | 4801 | 38.111 | 33.172 | 15.516 | 0.00 | 0.00 | H |
| ATOM | 3661 | H2 | WAT | 4801 | 39.543 | 33.652 | 15.420 | 0.00 | 0.00 | H |
| TER  | 3662 |    | WAT | 4801 |        |        |        |      |      |   |
| ATOM | 3663 | O  | WAT | 4810 | 23.426 | 48.803 | 34.178 | 0.00 | 0.00 | O |
| ATOM | 3664 | H1 | WAT | 4810 | 24.378 | 48.811 | 34.084 | 0.00 | 0.00 | H |
| ATOM | 3665 | H2 | WAT | 4810 | 23.101 | 49.169 | 33.355 | 0.00 | 0.00 | H |
| TER  | 3666 |    | WAT | 4810 |        |        |        |      |      |   |
| ATOM | 3667 | O  | WAT | 4853 | 14.884 | 26.966 | 26.698 | 0.00 | 0.00 | O |
| ATOM | 3668 | H1 | WAT | 4853 | 14.998 | 27.903 | 26.542 | 0.00 | 0.00 | H |
| ATOM | 3669 | H2 | WAT | 4853 | 14.741 | 26.894 | 27.642 | 0.00 | 0.00 | H |
| TER  | 3670 |    | WAT | 4853 |        |        |        |      |      |   |
| ATOM | 3671 | O  | WAT | 4872 | 17.623 | 28.303 | 25.125 | 0.00 | 0.00 | O |
| ATOM | 3672 | H1 | WAT | 4872 | 16.958 | 28.577 | 25.757 | 0.00 | 0.00 | H |
| ATOM | 3673 | H2 | WAT | 4872 | 17.295 | 28.614 | 24.282 | 0.00 | 0.00 | H |
| TER  | 3674 |    | WAT | 4872 |        |        |        |      |      |   |
| ATOM | 3675 | O  | WAT | 4880 | 29.977 | 57.560 | 23.519 | 0.00 | 0.00 | O |
| ATOM | 3676 | H1 | WAT | 4880 | 29.589 | 56.955 | 24.153 | 0.00 | 0.00 | H |
| ATOM | 3677 | H2 | WAT | 4880 | 30.811 | 57.155 | 23.282 | 0.00 | 0.00 | H |
| TER  | 3678 |    | WAT | 4880 |        |        |        |      |      |   |
| ATOM | 3679 | O  | WAT | 4929 | 28.094 | 50.475 | 34.588 | 0.00 | 0.00 | O |
| ATOM | 3680 | H1 | WAT | 4929 | 28.579 | 50.761 | 33.814 | 0.00 | 0.00 | H |
| ATOM | 3681 | H2 | WAT | 4929 | 27.415 | 49.895 | 34.246 | 0.00 | 0.00 | H |
| TER  | 3682 |    | WAT | 4929 |        |        |        |      |      |   |
| ATOM | 3683 | O  | WAT | 4962 | 37.167 | 27.675 | 27.608 | 0.00 | 0.00 | O |
| ATOM | 3684 | H1 | WAT | 4962 | 37.412 | 28.525 | 27.972 | 0.00 | 0.00 | H |
| ATOM | 3685 | H2 | WAT | 4962 | 37.339 | 27.758 | 26.670 | 0.00 | 0.00 | H |
| TER  | 3686 |    | WAT | 4962 |        |        |        |      |      |   |
| ATOM | 3687 | O  | WAT | 4965 | 36.259 | 32.711 | 13.207 | 0.00 | 0.00 | O |
| ATOM | 3688 | H1 | WAT | 4965 | 36.759 | 32.037 | 13.665 | 0.00 | 0.00 | H |
| ATOM | 3689 | H2 | WAT | 4965 | 36.626 | 32.722 | 12.322 | 0.00 | 0.00 | H |
| TER  | 3690 |    | WAT | 4965 |        |        |        |      |      |   |
| ATOM | 3691 | O  | WAT | 4987 | 20.589 | 46.423 | 32.587 | 0.00 | 0.00 | O |
| ATOM | 3692 | H1 | WAT | 4987 | 20.310 | 47.281 | 32.905 | 0.00 | 0.00 | H |



|      |      |    |     |      |        |        |        |      |      |   |
|------|------|----|-----|------|--------|--------|--------|------|------|---|
| ATOM | 3693 | H2 | WAT | 4987 | 21.504 | 46.353 | 32.857 | 0.00 | 0.00 | H |
| TER  | 3694 |    | WAT | 4987 |        |        |        |      |      |   |
| ATOM | 3695 | O  | WAT | 4992 | 40.026 | 43.408 | 38.652 | 0.00 | 0.00 | O |
| ATOM | 3696 | H1 | WAT | 4992 | 39.371 | 42.948 | 39.177 | 0.00 | 0.00 | H |
| ATOM | 3697 | H2 | WAT | 4992 | 39.994 | 44.311 | 38.966 | 0.00 | 0.00 | H |
| ATOM | 3698 | O  | WAT | 4993 | 44.048 | 55.423 | 19.379 | 0.00 | 0.00 | O |
| ATOM | 3699 | H1 | WAT | 4993 | 44.982 | 55.266 | 19.237 | 0.00 | 0.00 | H |
| ATOM | 3700 | H2 | WAT | 4993 | 43.899 | 56.303 | 19.033 | 0.00 | 0.00 | H |
| TER  | 3701 |    | WAT | 4993 |        |        |        |      |      |   |
| ATOM | 3702 | O  | WAT | 5022 | 36.065 | 56.220 | 25.378 | 0.00 | 0.00 | O |
| ATOM | 3703 | H1 | WAT | 5022 | 36.801 | 56.793 | 25.163 | 0.00 | 0.00 | H |
| ATOM | 3704 | H2 | WAT | 5022 | 35.582 | 56.693 | 26.055 | 0.00 | 0.00 | H |
| TER  | 3705 |    | WAT | 5022 |        |        |        |      |      |   |
| ATOM | 3706 | O  | WAT | 5049 | 26.470 | 36.642 | 31.452 | 0.00 | 0.00 | O |
| ATOM | 3707 | H1 | WAT | 5049 | 25.595 | 36.651 | 31.843 | 0.00 | 0.00 | H |
| ATOM | 3708 | H2 | WAT | 5049 | 26.664 | 37.562 | 31.277 | 0.00 | 0.00 | H |
| TER  | 3709 |    | WAT | 5049 |        |        |        |      |      |   |
| ATOM | 3710 | O  | WAT | 5055 | 19.587 | 24.883 | 20.502 | 0.00 | 0.00 | O |
| ATOM | 3711 | H1 | WAT | 5055 | 18.649 | 24.742 | 20.375 | 0.00 | 0.00 | H |
| ATOM | 3712 | H2 | WAT | 5055 | 20.006 | 24.227 | 19.946 | 0.00 | 0.00 | H |
| TER  | 3713 |    | WAT | 5055 |        |        |        |      |      |   |
| ATOM | 3714 | O  | WAT | 5081 | 20.497 | 61.012 | 23.078 | 0.00 | 0.00 | O |
| ATOM | 3715 | H1 | WAT | 5081 | 20.486 | 60.194 | 23.573 | 0.00 | 0.00 | H |
| ATOM | 3716 | H2 | WAT | 5081 | 19.687 | 60.996 | 22.569 | 0.00 | 0.00 | H |
| TER  | 3717 |    | WAT | 5081 |        |        |        |      |      |   |
| ATOM | 3718 | O  | WAT | 5129 | 22.645 | 62.516 | 10.289 | 0.00 | 0.00 | O |
| ATOM | 3719 | H1 | WAT | 5129 | 23.023 | 61.898 | 9.663  | 0.00 | 0.00 | H |
| ATOM | 3720 | H2 | WAT | 5129 | 22.517 | 63.320 | 9.785  | 0.00 | 0.00 | H |
| TER  | 3721 |    | WAT | 5129 |        |        |        |      |      |   |
| ATOM | 3722 | O  | WAT | 5132 | 13.024 | 58.428 | 16.349 | 0.00 | 0.00 | O |
| ATOM | 3723 | H1 | WAT | 5132 | 12.525 | 57.691 | 15.994 | 0.00 | 0.00 | H |
| ATOM | 3724 | H2 | WAT | 5132 | 13.762 | 58.020 | 16.801 | 0.00 | 0.00 | H |
| TER  | 3725 |    | WAT | 5132 |        |        |        |      |      |   |
| ATOM | 3726 | O  | WAT | 5188 | 13.146 | 59.306 | 20.302 | 0.00 | 0.00 | O |
| ATOM | 3727 | H1 | WAT | 5188 | 12.493 | 58.662 | 20.029 | 0.00 | 0.00 | H |
| ATOM | 3728 | H2 | WAT | 5188 | 13.528 | 58.937 | 21.099 | 0.00 | 0.00 | H |
| TER  | 3729 |    | WAT | 5188 |        |        |        |      |      |   |
| ATOM | 3730 | O  | WAT | 5192 | 23.103 | 40.794 | 25.372 | 0.00 | 0.00 | O |
| ATOM | 3731 | H1 | WAT | 5192 | 22.453 | 40.603 | 24.696 | 0.00 | 0.00 | H |
| ATOM | 3732 | H2 | WAT | 5192 | 22.589 | 41.096 | 26.121 | 0.00 | 0.00 | H |
| TER  | 3733 |    | WAT | 5192 |        |        |        |      |      |   |
| ATOM | 3734 | O  | WAT | 5215 | 27.666 | 34.330 | 37.718 | 0.00 | 0.00 | O |
| ATOM | 3735 | H1 | WAT | 5215 | 28.462 | 34.845 | 37.578 | 0.00 | 0.00 | H |
| ATOM | 3736 | H2 | WAT | 5215 | 26.961 | 34.885 | 37.381 | 0.00 | 0.00 | H |
| TER  | 3737 |    | WAT | 5215 |        |        |        |      |      |   |
| ATOM | 3738 | O  | WAT | 5240 | 14.427 | 27.067 | 15.303 | 0.00 | 0.00 | O |
| ATOM | 3739 | H1 | WAT | 5240 | 14.631 | 27.361 | 16.190 | 0.00 | 0.00 | H |
| ATOM | 3740 | H2 | WAT | 5240 | 14.885 | 27.686 | 14.734 | 0.00 | 0.00 | H |
| ATOM | 3741 | O  | WAT | 5241 | 9.255  | 54.576 | 21.642 | 0.00 | 0.00 | O |
| ATOM | 3742 | H1 | WAT | 5241 | 9.459  | 55.477 | 21.388 | 0.00 | 0.00 | H |
| ATOM | 3743 | H2 | WAT | 5241 | 10.058 | 54.256 | 22.052 | 0.00 | 0.00 | H |
| TER  | 3744 |    | WAT | 5241 |        |        |        |      |      |   |
| ATOM | 3745 | O  | WAT | 5248 | 11.297 | 52.780 | 27.951 | 0.00 | 0.00 | O |
| ATOM | 3746 | H1 | WAT | 5248 | 10.495 | 53.128 | 27.562 | 0.00 | 0.00 | H |
| ATOM | 3747 | H2 | WAT | 5248 | 11.825 | 52.502 | 27.203 | 0.00 | 0.00 | H |
| TER  | 3748 |    | WAT | 5248 |        |        |        |      |      |   |
| ATOM | 3749 | O  | WAT | 5254 | 22.149 | 23.152 | 9.928  | 0.00 | 0.00 | O |
| ATOM | 3750 | H1 | WAT | 5254 | 22.586 | 23.241 | 9.082  | 0.00 | 0.00 | H |
| ATOM | 3751 | H2 | WAT | 5254 | 22.148 | 22.210 | 10.098 | 0.00 | 0.00 | H |
| TER  | 3752 |    | WAT | 5254 |        |        |        |      |      |   |
| ATOM | 3753 | O  | WAT | 5276 | 12.048 | 34.754 | 31.869 | 0.00 | 0.00 | O |
| ATOM | 3754 | H1 | WAT | 5276 | 11.217 | 35.073 | 31.515 | 0.00 | 0.00 | H |
| ATOM | 3755 | H2 | WAT | 5276 | 12.713 | 35.285 | 31.432 | 0.00 | 0.00 | H |
| TER  | 3756 |    | WAT | 5276 |        |        |        |      |      |   |
| ATOM | 3757 | O  | WAT | 5307 | 6.087  | 28.225 | 10.859 | 0.00 | 0.00 | O |
| ATOM | 3758 | H1 | WAT | 5307 | 6.078  | 28.911 | 11.525 | 0.00 | 0.00 | H |
| ATOM | 3759 | H2 | WAT | 5307 | 5.462  | 27.574 | 11.177 | 0.00 | 0.00 | H |
| TER  | 3760 |    | WAT | 5307 |        |        |        |      |      |   |
| ATOM | 3761 | O  | WAT | 5342 | 19.338 | 59.733 | 10.339 | 0.00 | 0.00 | O |
| ATOM | 3762 | H1 | WAT | 5342 | 19.816 | 60.374 | 10.865 | 0.00 | 0.00 | H |
| ATOM | 3763 | H2 | WAT | 5342 | 18.522 | 60.174 | 10.106 | 0.00 | 0.00 | H |
| TER  | 3764 |    | WAT | 5342 |        |        |        |      |      |   |
| ATOM | 3765 | O  | WAT | 5351 | 10.291 | 40.310 | 5.948  | 0.00 | 0.00 | O |
| ATOM | 3766 | H1 | WAT | 5351 | 10.091 | 40.800 | 6.745  | 0.00 | 0.00 | H |
| ATOM | 3767 | H2 | WAT | 5351 | 9.754  | 40.724 | 5.272  | 0.00 | 0.00 | H |
| TER  | 3768 |    | WAT | 5351 |        |        |        |      |      |   |
| ATOM | 3769 | O  | WAT | 5519 | 26.114 | 39.138 | 33.334 | 0.00 | 0.00 | O |
| ATOM | 3770 | H1 | WAT | 5519 | 26.088 | 38.231 | 33.636 | 0.00 | 0.00 | H |
| ATOM | 3771 | H2 | WAT | 5519 | 26.312 | 39.074 | 32.399 | 0.00 | 0.00 | H |
| TER  | 3772 |    | WAT | 5519 |        |        |        |      |      |   |
| ATOM | 3773 | O  | WAT | 5555 | 39.554 | 47.983 | 11.347 | 0.00 | 0.00 | O |
| ATOM | 3774 | H1 | WAT | 5555 | 39.636 | 47.650 | 12.240 | 0.00 | 0.00 | H |
| ATOM | 3775 | H2 | WAT | 5555 | 39.043 | 48.787 | 11.438 | 0.00 | 0.00 | H |
| TER  | 3776 |    | WAT | 5555 |        |        |        |      |      |   |
| ATOM | 3777 | O  | WAT | 5558 | 23.687 | 43.077 | 28.722 | 0.00 | 0.00 | O |
| ATOM | 3778 | H1 | WAT | 5558 | 23.429 | 43.922 | 28.352 | 0.00 | 0.00 | H |
| ATOM | 3779 | H2 | WAT | 5558 | 22.904 | 42.533 | 28.645 | 0.00 | 0.00 | H |
| TER  | 3780 |    | WAT | 5558 |        |        |        |      |      |   |
| ATOM | 3781 | O  | WAT | 5583 | 14.079 | 60.626 | 36.372 | 0.00 | 0.00 | O |
| ATOM | 3782 | H1 | WAT | 5583 | 13.727 | 61.211 | 37.043 | 0.00 | 0.00 | H |
| ATOM | 3783 | H2 | WAT | 5583 | 13.368 | 60.010 | 36.194 | 0.00 | 0.00 | H |
| TER  | 3784 |    | WAT | 5583 |        |        |        |      |      |   |
| ATOM | 3785 | O  | WAT | 5653 | 36.337 | 56.443 | 8.331  | 0.00 | 0.00 | O |
| ATOM | 3786 | H1 | WAT | 5653 | 36.221 | 56.643 | 7.401  | 0.00 | 0.00 | H |
| ATOM | 3787 | H2 | WAT | 5653 | 37.252 | 56.657 | 8.508  | 0.00 | 0.00 | H |
| TER  | 3788 |    | WAT | 5653 |        |        |        |      |      |   |
| ATOM | 3789 | O  | WAT | 5671 | 46.143 | 44.652 | 13.233 | 0.00 | 0.00 | O |
| ATOM | 3790 | H1 | WAT | 5671 | 46.941 | 44.327 | 13.650 | 0.00 | 0.00 | H |
| ATOM | 3791 | H2 | WAT | 5671 | 45.969 | 45.488 | 13.666 | 0.00 | 0.00 | H |
| TER  | 3792 |    | WAT | 5671 |        |        |        |      |      |   |
| ATOM | 3793 | O  | WAT | 5795 | 39.900 | 45.236 | 17.464 | 0.00 | 0.00 | O |
| ATOM | 3794 | H1 | WAT | 5795 | 39.121 | 45.583 | 17.899 | 0.00 | 0.00 | H |
| ATOM | 3795 | H2 | WAT | 5795 | 39.715 | 45.332 | 16.529 | 0.00 | 0.00 | H |
| TER  | 3796 |    | WAT | 5795 |        |        |        |      |      |   |
| ATOM | 3797 | O  | WAT | 5803 | 40.340 | 43.742 | 36.023 | 0.00 | 0.00 | O |

|      |      |    |     |      |        |        |        |      |      |   |
|------|------|----|-----|------|--------|--------|--------|------|------|---|
| ATOM | 3798 | H1 | WAT | 5803 | 39.535 | 44.183 | 35.750 | 0.00 | 0.00 | H |
| ATOM | 3799 | H2 | WAT | 5803 | 40.165 | 43.460 | 36.921 | 0.00 | 0.00 | H |
| TER  | 3800 |    | WAT | 5803 |        |        |        |      |      |   |
| ATOM | 3801 | O  | WAT | 5831 | 24.846 | 22.860 | 8.229  | 0.00 | 0.00 | O |
| ATOM | 3802 | H1 | WAT | 5831 | 24.197 | 23.509 | 7.960  | 0.00 | 0.00 | H |
| ATOM | 3803 | H2 | WAT | 5831 | 25.619 | 23.061 | 7.699  | 0.00 | 0.00 | H |
| TER  | 3804 |    | WAT | 5831 |        |        |        |      |      |   |
| ATOM | 3805 | O  | WAT | 5835 | 32.644 | 53.799 | 10.342 | 0.00 | 0.00 | O |
| ATOM | 3806 | H1 | WAT | 5835 | 32.859 | 54.661 | 9.984  | 0.00 | 0.00 | H |
| ATOM | 3807 | H2 | WAT | 5835 | 33.310 | 53.216 | 9.979  | 0.00 | 0.00 | H |
| TER  | 3808 |    | WAT | 5835 |        |        |        |      |      |   |
| ATOM | 3809 | O  | WAT | 5853 | 22.486 | 29.910 | 28.010 | 0.00 | 0.00 | O |
| ATOM | 3810 | H1 | WAT | 5853 | 22.629 | 28.976 | 28.161 | 0.00 | 0.00 | H |
| ATOM | 3811 | H2 | WAT | 5853 | 21.537 | 29.996 | 27.918 | 0.00 | 0.00 | H |
| TER  | 3812 |    | WAT | 5853 |        |        |        |      |      |   |
| ATOM | 3813 | O  | WAT | 5856 | 9.833  | 42.890 | 12.951 | 0.00 | 0.00 | O |
| ATOM | 3814 | H1 | WAT | 5856 | 10.024 | 42.712 | 13.871 | 0.00 | 0.00 | H |
| ATOM | 3815 | H2 | WAT | 5856 | 10.605 | 42.576 | 12.480 | 0.00 | 0.00 | H |
| TER  | 3816 |    | WAT | 5856 |        |        |        |      |      |   |
| ATOM | 3817 | O  | WAT | 5934 | 38.138 | 40.621 | 7.821  | 0.00 | 0.00 | O |
| ATOM | 3818 | H1 | WAT | 5934 | 37.876 | 40.831 | 6.926  | 0.00 | 0.00 | H |
| ATOM | 3819 | H2 | WAT | 5934 | 37.605 | 41.199 | 8.369  | 0.00 | 0.00 | H |
| TER  | 3820 |    | WAT | 5934 |        |        |        |      |      |   |
| ATOM | 3821 | O  | WAT | 5950 | 20.220 | 51.403 | 34.054 | 0.00 | 0.00 | O |
| ATOM | 3822 | H1 | WAT | 5950 | 20.723 | 51.568 | 34.851 | 0.00 | 0.00 | H |
| ATOM | 3823 | H2 | WAT | 5950 | 20.878 | 51.340 | 33.363 | 0.00 | 0.00 | H |
| TER  | 3824 |    | WAT | 5950 |        |        |        |      |      |   |
| ATOM | 3825 | O  | WAT | 5952 | 10.832 | 31.458 | 21.816 | 0.00 | 0.00 | O |
| ATOM | 3826 | H1 | WAT | 5952 | 10.784 | 31.054 | 22.683 | 0.00 | 0.00 | H |
| ATOM | 3827 | H2 | WAT | 5952 | 11.727 | 31.792 | 21.758 | 0.00 | 0.00 | H |
| TER  | 3828 |    | WAT | 5952 |        |        |        |      |      |   |
| ATOM | 3829 | O  | WAT | 6017 | 14.172 | 25.159 | 10.223 | 0.00 | 0.00 | O |
| ATOM | 3830 | H1 | WAT | 6017 | 14.644 | 25.910 | 10.581 | 0.00 | 0.00 | H |
| ATOM | 3831 | H2 | WAT | 6017 | 13.522 | 25.543 | 9.634  | 0.00 | 0.00 | H |
| ATOM | 3832 | O  | WAT | 6018 | 38.202 | 27.098 | 18.484 | 0.00 | 0.00 | O |
| ATOM | 3833 | H1 | WAT | 6018 | 38.124 | 27.781 | 19.150 | 0.00 | 0.00 | H |
| ATOM | 3834 | H2 | WAT | 6018 | 38.266 | 26.283 | 18.983 | 0.00 | 0.00 | H |
| TER  | 3835 |    | WAT | 6018 |        |        |        |      |      |   |
| ATOM | 3836 | O  | WAT | 6055 | 26.958 | 58.974 | 4.415  | 0.00 | 0.00 | O |
| ATOM | 3837 | H1 | WAT | 6055 | 27.330 | 59.163 | 5.277  | 0.00 | 0.00 | H |
| ATOM | 3838 | H2 | WAT | 6055 | 27.719 | 58.805 | 3.858  | 0.00 | 0.00 | H |
| TER  | 3839 |    | WAT | 6055 |        |        |        |      |      |   |
| ATOM | 3840 | O  | WAT | 6057 | 41.197 | 53.263 | 25.725 | 0.00 | 0.00 | O |
| ATOM | 3841 | H1 | WAT | 6057 | 40.457 | 52.734 | 26.021 | 0.00 | 0.00 | H |
| ATOM | 3842 | H2 | WAT | 6057 | 41.891 | 52.628 | 25.551 | 0.00 | 0.00 | H |
| TER  | 3843 |    | WAT | 6057 |        |        |        |      |      |   |
| ATOM | 3844 | O  | WAT | 6070 | 39.023 | 34.493 | 33.006 | 0.00 | 0.00 | O |
| ATOM | 3845 | H1 | WAT | 6070 | 38.197 | 34.544 | 32.527 | 0.00 | 0.00 | H |
| ATOM | 3846 | H2 | WAT | 6070 | 39.638 | 34.104 | 32.384 | 0.00 | 0.00 | H |
| TER  | 3847 |    | WAT | 6070 |        |        |        |      |      |   |
| ATOM | 3848 | O  | WAT | 6077 | 6.116  | 35.796 | 22.007 | 0.00 | 0.00 | O |
| ATOM | 3849 | H1 | WAT | 6077 | 6.246  | 35.748 | 21.060 | 0.00 | 0.00 | H |
| ATOM | 3850 | H2 | WAT | 6077 | 6.041  | 36.732 | 22.192 | 0.00 | 0.00 | H |
| TER  | 3851 |    | WAT | 6077 |        |        |        |      |      |   |
| ATOM | 3852 | O  | WAT | 6137 | 21.074 | 58.371 | 8.578  | 0.00 | 0.00 | O |
| ATOM | 3853 | H1 | WAT | 6137 | 21.847 | 57.915 | 8.911  | 0.00 | 0.00 | H |
| ATOM | 3854 | H2 | WAT | 6137 | 20.736 | 58.850 | 9.335  | 0.00 | 0.00 | H |
| TER  | 3855 |    | WAT | 6137 |        |        |        |      |      |   |
| ATOM | 3856 | O  | WAT | 6141 | 23.544 | 52.586 | 27.880 | 0.00 | 0.00 | O |
| ATOM | 3857 | H1 | WAT | 6141 | 23.670 | 51.758 | 27.417 | 0.00 | 0.00 | H |
| ATOM | 3858 | H2 | WAT | 6141 | 23.474 | 52.336 | 28.802 | 0.00 | 0.00 | H |
| TER  | 3859 |    | WAT | 6141 |        |        |        |      |      |   |
| ATOM | 3860 | O  | WAT | 6166 | 6.586  | 44.580 | 5.988  | 0.00 | 0.00 | O |
| ATOM | 3861 | H1 | WAT | 6166 | 6.194  | 43.713 | 5.884  | 0.00 | 0.00 | H |
| ATOM | 3862 | H2 | WAT | 6166 | 7.511  | 44.406 | 6.159  | 0.00 | 0.00 | H |
| TER  | 3863 |    | WAT | 6166 |        |        |        |      |      |   |
| ATOM | 3864 | O  | WAT | 6170 | 15.619 | 57.251 | 32.320 | 0.00 | 0.00 | O |
| ATOM | 3865 | H1 | WAT | 6170 | 16.424 | 57.663 | 32.004 | 0.00 | 0.00 | H |
| ATOM | 3866 | H2 | WAT | 6170 | 15.918 | 56.475 | 32.792 | 0.00 | 0.00 | H |
| TER  | 3867 |    | WAT | 6170 |        |        |        |      |      |   |
| ATOM | 3868 | O  | WAT | 6192 | 7.840  | 38.948 | 27.130 | 0.00 | 0.00 | O |
| ATOM | 3869 | H1 | WAT | 6192 | 8.752  | 38.762 | 26.904 | 0.00 | 0.00 | H |
| ATOM | 3870 | H2 | WAT | 6192 | 7.338  | 38.627 | 26.381 | 0.00 | 0.00 | H |
| ATOM | 3871 | O  | WAT | 6193 | 32.751 | 49.908 | -3.676 | 0.00 | 0.00 | O |
| ATOM | 3872 | H1 | WAT | 6193 | 32.781 | 49.676 | -4.604 | 0.00 | 0.00 | H |
| ATOM | 3873 | H2 | WAT | 6193 | 31.832 | 49.808 | -3.434 | 0.00 | 0.00 | H |
| TER  | 3874 |    | WAT | 6193 |        |        |        |      |      |   |
| ATOM | 3875 | O  | WAT | 6207 | 19.299 | 55.186 | 5.769  | 0.00 | 0.00 | O |
| ATOM | 3876 | H1 | WAT | 6207 | 18.615 | 55.836 | 5.611  | 0.00 | 0.00 | H |
| ATOM | 3877 | H2 | WAT | 6207 | 18.835 | 54.431 | 6.130  | 0.00 | 0.00 | H |
| TER  | 3878 |    | WAT | 6207 |        |        |        |      |      |   |
| ATOM | 3879 | O  | WAT | 6221 | 38.743 | 46.419 | 9.167  | 0.00 | 0.00 | O |
| ATOM | 3880 | H1 | WAT | 6221 | 37.906 | 46.865 | 9.039  | 0.00 | 0.00 | H |
| ATOM | 3881 | H2 | WAT | 6221 | 39.128 | 46.847 | 9.932  | 0.00 | 0.00 | H |
| TER  | 3882 |    | WAT | 6221 |        |        |        |      |      |   |
| ATOM | 3883 | O  | WAT | 6274 | 18.870 | 58.059 | 2.937  | 0.00 | 0.00 | O |
| ATOM | 3884 | H1 | WAT | 6274 | 19.145 | 58.259 | 2.042  | 0.00 | 0.00 | H |
| ATOM | 3885 | H2 | WAT | 6274 | 19.673 | 58.121 | 3.454  | 0.00 | 0.00 | H |
| TER  | 3886 |    | WAT | 6274 |        |        |        |      |      |   |
| ATOM | 3887 | O  | WAT | 6299 | 4.774  | 46.813 | 15.688 | 0.00 | 0.00 | O |
| ATOM | 3888 | H1 | WAT | 6299 | 5.540  | 47.290 | 15.369 | 0.00 | 0.00 | H |
| ATOM | 3889 | H2 | WAT | 6299 | 4.084  | 47.475 | 15.742 | 0.00 | 0.00 | H |
| TER  | 3890 |    | WAT | 6299 |        |        |        |      |      |   |
| ATOM | 3891 | O  | WAT | 6312 | 43.006 | 33.202 | 31.019 | 0.00 | 0.00 | O |
| ATOM | 3892 | H1 | WAT | 6312 | 43.055 | 32.249 | 31.091 | 0.00 | 0.00 | H |
| ATOM | 3893 | H2 | WAT | 6312 | 42.068 | 33.391 | 30.976 | 0.00 | 0.00 | H |
| TER  | 3894 |    | WAT | 6312 |        |        |        |      |      |   |
| ATOM | 3895 | O  | WAT | 6321 | 32.737 | 46.715 | 2.171  | 0.00 | 0.00 | O |
| ATOM | 3896 | H1 | WAT | 6321 | 33.624 | 46.383 | 2.308  | 0.00 | 0.00 | H |
| ATOM | 3897 | H2 | WAT | 6321 | 32.753 | 47.600 | 2.536  | 0.00 | 0.00 | H |
| TER  | 3898 |    | WAT | 6321 |        |        |        |      |      |   |
| ATOM | 3899 | O  | WAT | 6323 | 31.892 | 56.592 | 26.968 | 0.00 | 0.00 | O |
| ATOM | 3900 | H1 | WAT | 6323 | 31.549 | 56.287 | 27.808 | 0.00 | 0.00 | H |
| ATOM | 3901 | H2 | WAT | 6323 | 31.635 | 57.514 | 26.925 | 0.00 | 0.00 | H |
| TER  | 3902 |    | WAT | 6323 |        |        |        |      |      |   |

|      |      |    |     |      |        |        |        |      |      |   |
|------|------|----|-----|------|--------|--------|--------|------|------|---|
| ATOM | 3903 | O  | WAT | 6340 | 21.071 | 63.326 | 24.427 | 0.00 | 0.00 | O |
| ATOM | 3904 | H1 | WAT | 6340 | 21.120 | 63.108 | 25.358 | 0.00 | 0.00 | H |
| ATOM | 3905 | H2 | WAT | 6340 | 20.960 | 62.482 | 23.990 | 0.00 | 0.00 | H |
| TER  | 3906 |    | WAT | 6340 |        |        |        |      |      |   |
| ATOM | 3907 | O  | WAT | 6385 | 35.153 | 49.425 | 30.080 | 0.00 | 0.00 | O |
| ATOM | 3908 | H1 | WAT | 6385 | 35.469 | 48.525 | 30.167 | 0.00 | 0.00 | H |
| ATOM | 3909 | H2 | WAT | 6385 | 34.590 | 49.555 | 30.843 | 0.00 | 0.00 | H |
| TER  | 3910 |    | WAT | 6385 |        |        |        |      |      |   |
| ATOM | 3911 | O  | WAT | 6395 | 44.393 | 36.082 | 35.980 | 0.00 | 0.00 | O |
| ATOM | 3912 | H1 | WAT | 6395 | 45.216 | 36.569 | 35.938 | 0.00 | 0.00 | H |
| ATOM | 3913 | H2 | WAT | 6395 | 43.791 | 36.583 | 35.431 | 0.00 | 0.00 | H |
| TER  | 3914 |    | WAT | 6395 |        |        |        |      |      |   |
| ATOM | 3915 | O  | WAT | 6404 | 36.812 | 47.839 | 36.335 | 0.00 | 0.00 | O |
| ATOM | 3916 | H1 | WAT | 6404 | 37.592 | 47.645 | 36.855 | 0.00 | 0.00 | H |
| ATOM | 3917 | H2 | WAT | 6404 | 36.577 | 47.003 | 35.934 | 0.00 | 0.00 | H |
| TER  | 3918 |    | WAT | 6404 |        |        |        |      |      |   |
| ATOM | 3919 | O  | WAT | 6506 | 20.824 | 19.439 | 20.746 | 0.00 | 0.00 | O |
| ATOM | 3920 | H1 | WAT | 6506 | 20.105 | 18.889 | 21.055 | 0.00 | 0.00 | H |
| ATOM | 3921 | H2 | WAT | 6506 | 20.394 | 20.166 | 20.296 | 0.00 | 0.00 | H |
| TER  | 3922 |    | WAT | 6506 |        |        |        |      |      |   |
| ATOM | 3923 | O  | WAT | 6522 | 41.187 | 36.112 | 36.628 | 0.00 | 0.00 | O |
| ATOM | 3924 | H1 | WAT | 6522 | 40.298 | 35.758 | 36.616 | 0.00 | 0.00 | H |
| ATOM | 3925 | H2 | WAT | 6522 | 41.127 | 36.891 | 37.181 | 0.00 | 0.00 | H |
| ATOM | 3926 | O  | WAT | 6523 | 11.439 | 53.699 | 14.294 | 0.00 | 0.00 | O |
| ATOM | 3927 | H1 | WAT | 6523 | 10.511 | 53.583 | 14.091 | 0.00 | 0.00 | H |
| ATOM | 3928 | H2 | WAT | 6523 | 11.865 | 52.930 | 13.914 | 0.00 | 0.00 | H |
| TER  | 3929 |    | WAT | 6523 |        |        |        |      |      |   |
| ATOM | 3930 | O  | WAT | 6698 | 26.281 | 36.704 | 4.099  | 0.00 | 0.00 | O |
| ATOM | 3931 | H1 | WAT | 6698 | 25.827 | 37.536 | 3.968  | 0.00 | 0.00 | H |
| ATOM | 3932 | H2 | WAT | 6698 | 25.581 | 36.052 | 4.140  | 0.00 | 0.00 | H |
| TER  | 3933 |    | WAT | 6698 |        |        |        |      |      |   |
| ATOM | 3934 | O  | WAT | 6708 | 44.353 | 39.000 | 16.967 | 0.00 | 0.00 | O |
| ATOM | 3935 | H1 | WAT | 6708 | 43.729 | 38.667 | 17.612 | 0.00 | 0.00 | H |
| ATOM | 3936 | H2 | WAT | 6708 | 44.402 | 38.313 | 16.303 | 0.00 | 0.00 | H |
| TER  | 3937 |    | WAT | 6708 |        |        |        |      |      |   |
| ATOM | 3938 | O  | WAT | 6715 | 14.622 | 50.756 | 28.941 | 0.00 | 0.00 | O |
| ATOM | 3939 | H1 | WAT | 6715 | 15.112 | 51.431 | 28.471 | 0.00 | 0.00 | H |
| ATOM | 3940 | H2 | WAT | 6715 | 14.874 | 50.872 | 29.857 | 0.00 | 0.00 | H |
| ATOM | 3941 | O  | WAT | 6716 | 19.695 | 35.093 | 5.674  | 0.00 | 0.00 | O |
| ATOM | 3942 | H1 | WAT | 6716 | 19.241 | 34.254 | 5.760  | 0.00 | 0.00 | H |
| ATOM | 3943 | H2 | WAT | 6716 | 19.565 | 35.522 | 6.521  | 0.00 | 0.00 | H |
| TER  | 3944 |    | WAT | 6716 |        |        |        |      |      |   |
| ATOM | 3945 | O  | WAT | 6755 | 23.489 | 58.184 | 0.189  | 0.00 | 0.00 | O |
| ATOM | 3946 | H1 | WAT | 6755 | 23.681 | 58.641 | -0.630 | 0.00 | 0.00 | H |
| ATOM | 3947 | H2 | WAT | 6755 | 24.348 | 57.935 | 0.531  | 0.00 | 0.00 | H |
| TER  | 3948 |    | WAT | 6755 |        |        |        |      |      |   |
| ATOM | 3949 | O  | WAT | 6770 | 15.741 | 25.396 | 24.843 | 0.00 | 0.00 | O |
| ATOM | 3950 | H1 | WAT | 6770 | 15.428 | 26.040 | 25.480 | 0.00 | 0.00 | H |
| ATOM | 3951 | H2 | WAT | 6770 | 15.144 | 25.486 | 24.100 | 0.00 | 0.00 | H |
| TER  | 3952 |    | WAT | 6770 |        |        |        |      |      |   |
| ATOM | 3953 | O  | WAT | 6781 | 7.278  | 44.408 | 27.034 | 0.00 | 0.00 | O |
| ATOM | 3954 | H1 | WAT | 6781 | 6.692  | 44.461 | 27.790 | 0.00 | 0.00 | H |
| ATOM | 3955 | H2 | WAT | 6781 | 7.162  | 43.517 | 26.704 | 0.00 | 0.00 | H |
| TER  | 3956 |    | WAT | 6781 |        |        |        |      |      |   |
| ATOM | 3957 | O  | WAT | 6818 | 28.059 | 39.468 | 39.379 | 0.00 | 0.00 | O |
| ATOM | 3958 | H1 | WAT | 6818 | 28.932 | 39.856 | 39.317 | 0.00 | 0.00 | H |
| ATOM | 3959 | H2 | WAT | 6818 | 28.220 | 38.554 | 39.613 | 0.00 | 0.00 | H |
| TER  | 3960 |    | WAT | 6818 |        |        |        |      |      |   |
| ATOM | 3961 | O  | WAT | 6865 | 37.962 | 50.544 | 8.854  | 0.00 | 0.00 | O |
| ATOM | 3962 | H1 | WAT | 6865 | 37.548 | 50.991 | 9.592  | 0.00 | 0.00 | H |
| ATOM | 3963 | H2 | WAT | 6865 | 38.736 | 50.124 | 9.231  | 0.00 | 0.00 | H |
| TER  | 3964 |    | WAT | 6865 |        |        |        |      |      |   |
| ATOM | 3965 | O  | WAT | 6910 | 34.048 | 48.806 | 34.253 | 0.00 | 0.00 | O |
| ATOM | 3966 | H1 | WAT | 6910 | 33.835 | 48.574 | 35.157 | 0.00 | 0.00 | H |
| ATOM | 3967 | H2 | WAT | 6910 | 33.336 | 48.432 | 33.735 | 0.00 | 0.00 | H |
| TER  | 3968 |    | WAT | 6910 |        |        |        |      |      |   |
| ATOM | 3969 | O  | WAT | 6917 | 28.421 | 36.944 | 39.991 | 0.00 | 0.00 | O |
| ATOM | 3970 | H1 | WAT | 6917 | 29.073 | 36.584 | 39.391 | 0.00 | 0.00 | H |
| ATOM | 3971 | H2 | WAT | 6917 | 28.741 | 36.708 | 40.862 | 0.00 | 0.00 | H |
| TER  | 3972 |    | WAT | 6917 |        |        |        |      |      |   |
| ATOM | 3973 | O  | WAT | 6959 | 25.159 | 48.103 | 0.752  | 0.00 | 0.00 | O |
| ATOM | 3974 | H1 | WAT | 6959 | 25.251 | 47.883 | 1.678  | 0.00 | 0.00 | H |
| ATOM | 3975 | H2 | WAT | 6959 | 24.917 | 49.029 | 0.748  | 0.00 | 0.00 | H |
| TER  | 3976 |    | WAT | 6959 |        |        |        |      |      |   |
| ATOM | 3977 | O  | WAT | 7039 | 14.751 | 46.922 | 34.845 | 0.00 | 0.00 | O |
| ATOM | 3978 | H1 | WAT | 7039 | 15.392 | 47.529 | 35.215 | 0.00 | 0.00 | H |
| ATOM | 3979 | H2 | WAT | 7039 | 14.882 | 46.984 | 33.899 | 0.00 | 0.00 | H |
| TER  | 3980 |    | WAT | 7039 |        |        |        |      |      |   |
| ATOM | 3981 | O  | WAT | 7071 | 19.970 | 60.476 | 31.271 | 0.00 | 0.00 | O |
| ATOM | 3982 | H1 | WAT | 7071 | 19.715 | 60.635 | 30.362 | 0.00 | 0.00 | H |
| ATOM | 3983 | H2 | WAT | 7071 | 20.610 | 59.766 | 31.219 | 0.00 | 0.00 | H |
| ATOM | 3984 | O  | WAT | 7072 | 43.185 | 28.461 | 24.680 | 0.00 | 0.00 | O |
| ATOM | 3985 | H1 | WAT | 7072 | 43.151 | 29.418 | 24.680 | 0.00 | 0.00 | H |
| ATOM | 3986 | H2 | WAT | 7072 | 42.953 | 28.212 | 23.786 | 0.00 | 0.00 | H |
| TER  | 3987 |    | WAT | 7072 |        |        |        |      |      |   |
| ATOM | 3988 | O  | WAT | 7137 | 22.714 | 46.730 | 0.501  | 0.00 | 0.00 | O |
| ATOM | 3989 | H1 | WAT | 7137 | 23.447 | 47.177 | 0.923  | 0.00 | 0.00 | H |
| ATOM | 3990 | H2 | WAT | 7137 | 22.013 | 46.751 | 1.153  | 0.00 | 0.00 | H |
| TER  | 3991 |    | WAT | 7137 |        |        |        |      |      |   |
| ATOM | 3992 | O  | WAT | 7140 | 12.563 | 24.610 | 23.027 | 0.00 | 0.00 | O |
| ATOM | 3993 | H1 | WAT | 7140 | 13.251 | 24.915 | 22.435 | 0.00 | 0.00 | H |
| ATOM | 3994 | H2 | WAT | 7140 | 12.574 | 23.657 | 22.936 | 0.00 | 0.00 | H |
| TER  | 3995 |    | WAT | 7140 |        |        |        |      |      |   |
| ATOM | 3996 | O  | WAT | 7211 | 46.389 | 41.916 | 18.914 | 0.00 | 0.00 | O |
| ATOM | 3997 | H1 | WAT | 7211 | 46.628 | 41.424 | 18.128 | 0.00 | 0.00 | H |
| ATOM | 3998 | H2 | WAT | 7211 | 45.553 | 42.327 | 18.694 | 0.00 | 0.00 | H |
| TER  | 3999 |    | WAT | 7211 |        |        |        |      |      |   |
| ATOM | 4000 | O  | WAT | 7229 | 8.474  | 46.737 | 10.278 | 0.00 | 0.00 | O |
| ATOM | 4001 | H1 | WAT | 7229 | 9.073  | 46.003 | 10.415 | 0.00 | 0.00 | H |
| ATOM | 4002 | H2 | WAT | 7229 | 7.667  | 46.332 | 9.960  | 0.00 | 0.00 | H |
| TER  | 4003 |    | WAT | 7229 |        |        |        |      |      |   |
| ATOM | 4004 | O  | WAT | 7235 | 26.350 | 56.252 | 26.475 | 0.00 | 0.00 | O |
| ATOM | 4005 | H1 | WAT | 7235 | 26.797 | 56.021 | 27.290 | 0.00 | 0.00 | H |
| ATOM | 4006 | H2 | WAT | 7235 | 25.548 | 55.728 | 26.485 | 0.00 | 0.00 | H |
| TER  | 4007 |    | WAT | 7235 |        |        |        |      |      |   |

|      |      |    |     |      |        |        |        |      |      |   |
|------|------|----|-----|------|--------|--------|--------|------|------|---|
| ATOM | 4008 | O  | WAT | 7259 | 19.819 | 59.958 | 17.251 | 0.00 | 0.00 | O |
| ATOM | 4009 | H1 | WAT | 7259 | 19.744 | 59.667 | 18.160 | 0.00 | 0.00 | H |
| ATOM | 4010 | H2 | WAT | 7259 | 18.917 | 60.125 | 16.977 | 0.00 | 0.00 | H |
| TER  | 4011 |    | WAT | 7259 |        |        |        |      |      |   |
| ATOM | 4012 | O  | WAT | 7293 | 42.438 | 36.215 | 25.704 | 0.00 | 0.00 | O |
| ATOM | 4013 | H1 | WAT | 7293 | 41.831 | 35.495 | 25.871 | 0.00 | 0.00 | H |
| ATOM | 4014 | H2 | WAT | 7293 | 43.101 | 36.135 | 26.391 | 0.00 | 0.00 | H |
| TER  | 4015 |    | WAT | 7293 |        |        |        |      |      |   |
| ATOM | 4016 | O  | WAT | 7401 | 18.146 | 25.216 | 9.692  | 0.00 | 0.00 | O |
| ATOM | 4017 | H1 | WAT | 7401 | 17.502 | 25.847 | 9.371  | 0.00 | 0.00 | H |
| ATOM | 4018 | H2 | WAT | 7401 | 18.662 | 24.986 | 8.920  | 0.00 | 0.00 | H |
| TER  | 4019 |    | WAT | 7401 |        |        |        |      |      |   |
| ATOM | 4020 | O  | WAT | 7411 | 16.527 | 38.284 | 4.638  | 0.00 | 0.00 | O |
| ATOM | 4021 | H1 | WAT | 7411 | 15.968 | 37.808 | 4.023  | 0.00 | 0.00 | H |
| ATOM | 4022 | H2 | WAT | 7411 | 15.990 | 38.381 | 5.424  | 0.00 | 0.00 | H |
| TER  | 4023 |    | WAT | 7411 |        |        |        |      |      |   |
| ATOM | 4024 | O  | WAT | 7418 | 31.637 | 38.908 | 43.623 | 0.00 | 0.00 | O |
| ATOM | 4025 | H1 | WAT | 7418 | 32.163 | 38.469 | 42.954 | 0.00 | 0.00 | H |
| ATOM | 4026 | H2 | WAT | 7418 | 30.947 | 39.352 | 43.131 | 0.00 | 0.00 | H |
| TER  | 4027 |    | WAT | 7418 |        |        |        |      |      |   |
| ATOM | 4028 | O  | WAT | 7483 | 6.699  | 40.249 | 12.623 | 0.00 | 0.00 | O |
| ATOM | 4029 | H1 | WAT | 7483 | 5.799  | 40.413 | 12.346 | 0.00 | 0.00 | H |
| ATOM | 4030 | H2 | WAT | 7483 | 6.617  | 39.886 | 13.506 | 0.00 | 0.00 | H |
| TER  | 4031 |    | WAT | 7483 |        |        |        |      |      |   |
| ATOM | 4032 | O  | WAT | 7491 | 38.799 | 50.946 | 11.984 | 0.00 | 0.00 | O |
| ATOM | 4033 | H1 | WAT | 7491 | 37.999 | 51.193 | 11.520 | 0.00 | 0.00 | H |
| ATOM | 4034 | H2 | WAT | 7491 | 39.486 | 51.468 | 11.570 | 0.00 | 0.00 | H |
| TER  | 4035 |    | WAT | 7491 |        |        |        |      |      |   |
| ATOM | 4036 | O  | WAT | 7533 | 26.118 | 24.713 | 6.111  | 0.00 | 0.00 | O |
| ATOM | 4037 | H1 | WAT | 7533 | 25.180 | 24.888 | 6.189  | 0.00 | 0.00 | H |
| ATOM | 4038 | H2 | WAT | 7533 | 26.453 | 25.436 | 5.583  | 0.00 | 0.00 | H |
| TER  | 4039 |    | WAT | 7533 |        |        |        |      |      |   |
| ATOM | 4040 | O  | WAT | 7538 | 34.391 | 62.551 | 20.532 | 0.00 | 0.00 | O |
| ATOM | 4041 | H1 | WAT | 7538 | 35.324 | 62.417 | 20.698 | 0.00 | 0.00 | H |
| ATOM | 4042 | H2 | WAT | 7538 | 33.954 | 61.892 | 21.073 | 0.00 | 0.00 | H |
| TER  | 4043 |    | WAT | 7538 |        |        |        |      |      |   |
| ATOM | 4044 | O  | WAT | 7621 | 27.579 | 41.691 | 35.396 | 0.00 | 0.00 | O |
| ATOM | 4045 | H1 | WAT | 7621 | 27.251 | 41.791 | 36.289 | 0.00 | 0.00 | H |
| ATOM | 4046 | H2 | WAT | 7621 | 27.897 | 40.788 | 35.358 | 0.00 | 0.00 | H |
| TER  | 4047 |    | WAT | 7621 |        |        |        |      |      |   |
| ATOM | 4048 | O  | WAT | 7702 | 41.957 | 49.993 | 26.428 | 0.00 | 0.00 | O |
| ATOM | 4049 | H1 | WAT | 7702 | 42.468 | 50.772 | 26.646 | 0.00 | 0.00 | H |
| ATOM | 4050 | H2 | WAT | 7702 | 42.350 | 49.667 | 25.618 | 0.00 | 0.00 | H |
| TER  | 4051 |    | WAT | 7702 |        |        |        |      |      |   |
| ATOM | 4052 | O  | WAT | 7719 | 21.813 | 41.068 | 27.771 | 0.00 | 0.00 | O |
| ATOM | 4053 | H1 | WAT | 7719 | 21.540 | 40.240 | 28.168 | 0.00 | 0.00 | H |
| ATOM | 4054 | H2 | WAT | 7719 | 21.180 | 41.709 | 28.096 | 0.00 | 0.00 | H |
| TER  | 4055 |    | WAT | 7719 |        |        |        |      |      |   |
| ATOM | 4056 | O  | WAT | 7727 | 45.855 | 52.155 | 19.469 | 0.00 | 0.00 | O |
| ATOM | 4057 | H1 | WAT | 7727 | 46.224 | 53.032 | 19.374 | 0.00 | 0.00 | H |
| ATOM | 4058 | H2 | WAT | 7727 | 45.078 | 52.280 | 20.015 | 0.00 | 0.00 | H |
| TER  | 4059 |    | WAT | 7727 |        |        |        |      |      |   |
| ATOM | 4060 | O  | WAT | 7767 | 33.755 | 46.598 | 36.166 | 0.00 | 0.00 | O |
| ATOM | 4061 | H1 | WAT | 7767 | 34.586 | 46.332 | 35.773 | 0.00 | 0.00 | H |
| ATOM | 4062 | H2 | WAT | 7767 | 34.004 | 47.053 | 36.971 | 0.00 | 0.00 | H |
| TER  | 4063 |    | WAT | 7767 |        |        |        |      |      |   |
| ATOM | 4064 | O  | WAT | 7772 | 36.470 | 56.910 | 5.586  | 0.00 | 0.00 | O |
| ATOM | 4065 | H1 | WAT | 7772 | 36.257 | 57.843 | 5.623  | 0.00 | 0.00 | H |
| ATOM | 4066 | H2 | WAT | 7772 | 35.746 | 56.518 | 5.100  | 0.00 | 0.00 | H |
| TER  | 4067 |    | WAT | 7772 |        |        |        |      |      |   |
| ATOM | 4068 | O  | WAT | 7791 | 27.927 | 50.032 | -4.941 | 0.00 | 0.00 | O |
| ATOM | 4069 | H1 | WAT | 7791 | 28.269 | 49.897 | -4.057 | 0.00 | 0.00 | H |
| ATOM | 4070 | H2 | WAT | 7791 | 28.038 | 49.185 | -5.372 | 0.00 | 0.00 | H |
| TER  | 4071 |    | WAT | 7791 |        |        |        |      |      |   |
| ATOM | 4072 | O  | WAT | 7796 | 35.128 | 26.363 | 24.561 | 0.00 | 0.00 | O |
| ATOM | 4073 | H1 | WAT | 7796 | 36.043 | 26.626 | 24.458 | 0.00 | 0.00 | H |
| ATOM | 4074 | H2 | WAT | 7796 | 34.866 | 26.063 | 23.690 | 0.00 | 0.00 | H |
| TER  | 4075 |    | WAT | 7796 |        |        |        |      |      |   |
| ATOM | 4076 | O  | WAT | 7851 | 35.898 | 32.586 | 30.190 | 0.00 | 0.00 | O |
| ATOM | 4077 | H1 | WAT | 7851 | 36.048 | 33.015 | 29.348 | 0.00 | 0.00 | H |
| ATOM | 4078 | H2 | WAT | 7851 | 36.775 | 32.419 | 30.533 | 0.00 | 0.00 | H |
| TER  | 4079 |    | WAT | 7851 |        |        |        |      |      |   |
| ATOM | 4080 | O  | WAT | 7862 | 24.372 | 56.899 | 19.056 | 0.00 | 0.00 | O |
| ATOM | 4081 | H1 | WAT | 7862 | 24.960 | 57.321 | 18.431 | 0.00 | 0.00 | H |
| ATOM | 4082 | H2 | WAT | 7862 | 23.740 | 56.430 | 18.512 | 0.00 | 0.00 | H |
| TER  | 4083 |    | WAT | 7862 |        |        |        |      |      |   |
| ATOM | 4084 | O  | WAT | 7876 | 38.026 | 24.631 | 26.045 | 0.00 | 0.00 | O |
| ATOM | 4085 | H1 | WAT | 7876 | 37.855 | 25.388 | 25.486 | 0.00 | 0.00 | H |
| ATOM | 4086 | H2 | WAT | 7876 | 37.884 | 24.953 | 26.936 | 0.00 | 0.00 | H |
| TER  | 4087 |    | WAT | 7876 |        |        |        |      |      |   |
| ATOM | 4088 | O  | WAT | 7916 | 30.337 | 47.820 | -4.686 | 0.00 | 0.00 | O |
| ATOM | 4089 | H1 | WAT | 7916 | 30.381 | 48.148 | -3.788 | 0.00 | 0.00 | H |
| ATOM | 4090 | H2 | WAT | 7916 | 31.014 | 48.310 | -5.154 | 0.00 | 0.00 | H |
| TER  | 4091 |    | WAT | 7916 |        |        |        |      |      |   |
| ATOM | 4092 | O  | WAT | 7929 | 16.783 | 57.697 | 20.801 | 0.00 | 0.00 | O |
| ATOM | 4093 | H1 | WAT | 7929 | 16.629 | 56.826 | 20.436 | 0.00 | 0.00 | H |
| ATOM | 4094 | H2 | WAT | 7929 | 16.349 | 57.678 | 21.655 | 0.00 | 0.00 | H |
| TER  | 4095 |    | WAT | 7929 |        |        |        |      |      |   |
| ATOM | 4096 | O  | WAT | 7961 | 40.116 | 47.711 | 1.733  | 0.00 | 0.00 | O |
| ATOM | 4097 | H1 | WAT | 7961 | 39.861 | 48.118 | 0.905  | 0.00 | 0.00 | H |
| ATOM | 4098 | H2 | WAT | 7961 | 40.452 | 48.434 | 2.262  | 0.00 | 0.00 | H |
| TER  | 4099 |    | WAT | 7961 |        |        |        |      |      |   |
| ATOM | 4100 | O  | WAT | 7972 | 23.048 | 39.302 | 4.613  | 0.00 | 0.00 | O |
| ATOM | 4101 | H1 | WAT | 7972 | 23.969 | 39.377 | 4.361  | 0.00 | 0.00 | H |
| ATOM | 4102 | H2 | WAT | 7972 | 23.059 | 38.762 | 5.402  | 0.00 | 0.00 | H |
| TER  | 4103 |    | WAT | 7972 |        |        |        |      |      |   |
| ATOM | 4104 | O  | WAT | 8016 | 36.450 | 25.376 | 22.160 | 0.00 | 0.00 | O |
| ATOM | 4105 | H1 | WAT | 8016 | 36.392 | 25.575 | 21.226 | 0.00 | 0.00 | H |
| ATOM | 4106 | H2 | WAT | 8016 | 37.175 | 25.913 | 22.476 | 0.00 | 0.00 | H |
| TER  | 4107 |    | WAT | 8016 |        |        |        |      |      |   |
| ATOM | 4108 | O  | WAT | 8051 | 13.483 | 56.139 | 11.390 | 0.00 | 0.00 | O |
| ATOM | 4109 | H1 | WAT | 8051 | 14.133 | 55.687 | 11.926 | 0.00 | 0.00 | H |
| ATOM | 4110 | H2 | WAT | 8051 | 13.786 | 57.047 | 11.360 | 0.00 | 0.00 | H |
| TER  | 4111 |    | WAT | 8051 |        |        |        |      |      |   |
| ATOM | 4112 | O  | WAT | 8083 | 12.627 | 50.996 | 6.130  | 0.00 | 0.00 | O |

|      |      |    |     |      |        |        |        |      |      |   |
|------|------|----|-----|------|--------|--------|--------|------|------|---|
| ATOM | 4113 | H1 | WAT | 8083 | 12.269 | 50.636 | 6.941  | 0.00 | 0.00 | H |
| ATOM | 4114 | H2 | WAT | 8083 | 13.569 | 51.059 | 6.291  | 0.00 | 0.00 | H |
| TER  | 4115 |    | WAT | 8083 |        |        |        |      |      |   |
| ATOM | 4116 | O  | WAT | 8149 | 17.452 | 52.243 | 33.769 | 0.00 | 0.00 | O |
| ATOM | 4117 | H1 | WAT | 8149 | 17.572 | 53.175 | 33.946 | 0.00 | 0.00 | H |
| ATOM | 4118 | H2 | WAT | 8149 | 18.331 | 51.869 | 33.839 | 0.00 | 0.00 | H |
| TER  | 4119 |    | WAT | 8149 |        |        |        |      |      |   |
| ATOM | 4120 | O  | WAT | 8157 | 11.710 | 39.145 | 30.676 | 0.00 | 0.00 | O |
| ATOM | 4121 | H1 | WAT | 8157 | 11.293 | 39.044 | 29.821 | 0.00 | 0.00 | H |
| ATOM | 4122 | H2 | WAT | 8157 | 11.045 | 38.858 | 31.302 | 0.00 | 0.00 | H |
| END  |      |    |     |      |        |        |        |      |      |   |

DATASET 57

HEADER APOPTOSIS 29-OCT-11 XXXX  
 TITLE 3D MODEL OF BAK IN COMPLEX WITH THE BH3 DOMAIN OF BIM  
 COMPND MOLECULE: APOPTOSIS REGULATOR BAK;  
 COMPND 2 SYNONYM: BCL-2 HOMOLOGOUS ANTAGONIST/KILLER, BCL-2- LIKE 7  
 COMPND 3 PROTEIN;  
 SOURCE MOLECULE 1 (RESIDUES 1-24): BIM;  
 SOURCE 2 NCBI ACCESSION: O43521;  
 SOURCE 3 ORGANISM\_SCIENTIFIC: HOMO SAPIENS;  
 SOURCE 4 ORGANISM\_COMMON: HUMAN;  
 SOURCE 5 MOLECULE 2 (RESIDUES 25-187): BAK;  
 SOURCE 6 NCBI ACCESSION: Q16611;  
 SOURCE 7 ORGANISM\_SCIENTIFIC: HOMO SAPIENS;  
 SOURCE 8 ORGANISM\_COMMON: HUMAN;  
 KEYWDS HETERODIMER, APOPTOSIS  
 EXPDTA THEORETICAL MODEL  
 JRNL AUTH Y-P PANG, H DAI, A SMITH, XW MENG, PA SCHNEIDER, SH KAUFMANN  
 JRNL TITL BAK CONFORMATIONAL CHANGES INDUCED BY LIGAND BINDING:  
 JRNL TITL 2 INSIGHT INTO BH3 DOMAIN BINDING AND BAK HOMO-OLIGOMERIZATION  
 JRNL REF SCIENTIFIC REPORTS, SUBMITTED  
 REMARK 220 THIS IS AN AVERAGE OF CLUSTER 2 CONTAINING 250 SIMILAR  
 REMARK 220 CONFORMERS IDENTIFIED BY CLUSTER ANALYSIS OF 80 10-NS MOLECULAR  
 REMARK 220 DYNAMICS SIMULATIONS OF BAK\*BIM USING PMEMD WITH THE  
 REMARK 220 FF99SB FORCE FIELD. NO ENERGY MINIMIZATION IS APPLIED  
 REMARK 220 TO THIS AVERAGE STRUCTURE.

MOL 1

|      |    |      |     |   |        |        |        |      |      |  |
|------|----|------|-----|---|--------|--------|--------|------|------|--|
| ATOM | 1  | N    | ARG | 1 | 6.143  | 27.394 | 13.378 | 0.00 | 0.00 |  |
| ATOM | 2  | H    | ARG | 1 | 6.581  | 27.345 | 14.044 | 0.00 | 0.00 |  |
| ATOM | 3  | CA   | ARG | 1 | 5.812  | 28.600 | 12.702 | 0.00 | 0.00 |  |
| ATOM | 4  | HA   | ARG | 1 | 4.981  | 28.407 | 12.076 | 0.00 | 0.00 |  |
| ATOM | 5  | CB   | ARG | 1 | 6.980  | 28.995 | 11.820 | 0.00 | 0.00 |  |
| ATOM | 6  | HB2  | ARG | 1 | 6.741  | 29.898 | 11.335 | 0.00 | 0.00 |  |
| ATOM | 7  | HB3  | ARG | 1 | 7.826  | 29.168 | 12.426 | 0.00 | 0.00 |  |
| ATOM | 8  | CG   | ARG | 1 | 7.325  | 27.985 | 10.757 | 0.00 | 0.00 |  |
| ATOM | 9  | HG2  | ARG | 1 | 7.564  | 27.056 | 11.192 | 0.00 | 0.00 |  |
| ATOM | 10 | HG3  | ARG | 1 | 6.473  | 27.860 | 10.144 | 0.00 | 0.00 |  |
| ATOM | 11 | CD   | ARG | 1 | 8.489  | 28.414 | 9.893  | 0.00 | 0.00 |  |
| ATOM | 12 | HD2  | ARG | 1 | 8.558  | 27.760 | 9.065  | 0.00 | 0.00 |  |
| ATOM | 13 | HD3  | ARG | 1 | 8.301  | 29.386 | 9.541  | 0.00 | 0.00 |  |
| ATOM | 14 | NE   | ARG | 1 | 9.741  | 28.385 | 10.593 | 0.00 | 0.00 |  |
| ATOM | 15 | HE   | ARG | 1 | 9.712  | 28.146 | 11.520 | 0.00 | 0.00 |  |
| ATOM | 16 | CZ   | ARG | 1 | 10.918 | 28.582 | 10.107 | 0.00 | 0.00 |  |
| ATOM | 17 | NH1  | ARG | 1 | 11.127 | 28.886 | 8.923  | 0.00 | 0.00 |  |
| ATOM | 18 | 1HH1 | ARG | 1 | 10.385 | 28.964 | 8.326  | 0.00 | 0.00 |  |
| ATOM | 19 | 2HH1 | ARG | 1 | 12.051 | 28.986 | 8.618  | 0.00 | 0.00 |  |
| ATOM | 20 | NH2  | ARG | 1 | 11.942 | 28.475 | 10.819 | 0.00 | 0.00 |  |
| ATOM | 21 | 1HH2 | ARG | 1 | 11.834 | 28.202 | 11.730 | 0.00 | 0.00 |  |
| ATOM | 22 | 2HH2 | ARG | 1 | 12.831 | 28.540 | 10.418 | 0.00 | 0.00 |  |
| ATOM | 23 | C    | ARG | 1 | 5.360  | 29.718 | 13.641 | 0.00 | 0.00 |  |
| ATOM | 24 | O    | ARG | 1 | 5.861  | 30.810 | 13.526 | 0.00 | 0.00 |  |
| ATOM | 25 | N    | PRO | 2 | 4.475  | 29.486 | 14.611 | 0.00 | 0.00 |  |
| ATOM | 26 | CD   | PRO | 2 | 3.661  | 28.325 | 14.750 | 0.00 | 0.00 |  |
| ATOM | 27 | HD2  | PRO | 2 | 4.197  | 27.589 | 15.262 | 0.00 | 0.00 |  |
| ATOM | 28 | HD3  | PRO | 2 | 3.344  | 27.961 | 13.817 | 0.00 | 0.00 |  |
| ATOM | 29 | CG   | PRO | 2 | 2.474  | 28.721 | 15.568 | 0.00 | 0.00 |  |
| ATOM | 30 | HG2  | PRO | 2 | 2.108  | 27.917 | 16.138 | 0.00 | 0.00 |  |
| ATOM | 31 | HG3  | PRO | 2 | 1.727  | 29.102 | 14.946 | 0.00 | 0.00 |  |
| ATOM | 32 | CB   | PRO | 2 | 3.014  | 29.807 | 16.434 | 0.00 | 0.00 |  |
| ATOM | 33 | HB2  | PRO | 2 | 2.247  | 30.455 | 16.764 | 0.00 | 0.00 |  |
| ATOM | 34 | HB3  | PRO | 2 | 3.502  | 29.382 | 17.265 | 0.00 | 0.00 |  |
| ATOM | 35 | CA   | PRO | 2 | 4.013  | 30.500 | 15.544 | 0.00 | 0.00 |  |
| ATOM | 36 | HA   | PRO | 2 | 3.505  | 31.243 | 14.979 | 0.00 | 0.00 |  |
| ATOM | 37 | C    | PRO | 2 | 5.091  | 31.186 | 16.350 | 0.00 | 0.00 |  |
| ATOM | 38 | O    | PRO | 2 | 4.901  | 32.293 | 16.793 | 0.00 | 0.00 |  |
| ATOM | 39 | N    | GLU | 3 | 6.246  | 30.580 | 16.513 | 0.00 | 0.00 |  |
| ATOM | 40 | H    | GLU | 3 | 6.330  | 29.657 | 16.181 | 0.00 | 0.00 |  |
| ATOM | 41 | CA   | GLU | 3 | 7.404  | 31.157 | 17.159 | 0.00 | 0.00 |  |
| ATOM | 42 | HA   | GLU | 3 | 7.088  | 31.526 | 18.109 | 0.00 | 0.00 |  |
| ATOM | 43 | CB   | GLU | 3 | 8.450  | 30.103 | 17.410 | 0.00 | 0.00 |  |
| ATOM | 44 | HB2  | GLU | 3 | 9.260  | 30.567 | 17.907 | 0.00 | 0.00 |  |
| ATOM | 45 | HB3  | GLU | 3 | 8.059  | 29.381 | 18.077 | 0.00 | 0.00 |  |
| ATOM | 46 | CG   | GLU | 3 | 9.003  | 29.395 | 16.198 | 0.00 | 0.00 |  |
| ATOM | 47 | HG2  | GLU | 3 | 8.838  | 29.874 | 15.399 | 0.00 | 0.00 |  |
| ATOM | 48 | HG3  | GLU | 3 | 9.943  | 29.348 | 16.284 | 0.00 | 0.00 |  |
| ATOM | 49 | CD   | GLU | 3 | 8.582  | 28.096 | 15.961 | 0.00 | 0.00 |  |
| ATOM | 50 | OE1  | GLU | 3 | 8.740  | 27.409 | 15.676 | 0.00 | 0.00 |  |
| ATOM | 51 | OE2  | GLU | 3 | 8.100  | 27.740 | 16.039 | 0.00 | 0.00 |  |
| ATOM | 52 | C    | GLU | 3 | 8.019  | 32.335 | 16.428 | 0.00 | 0.00 |  |
| ATOM | 53 | O    | GLU | 3 | 8.790  | 33.046 | 17.016 | 0.00 | 0.00 |  |
| ATOM | 54 | N    | ILE | 4 | 7.685  | 32.571 | 15.176 | 0.00 | 0.00 |  |
| ATOM | 55 | H    | ILE | 4 | 7.076  | 31.938 | 14.737 | 0.00 | 0.00 |  |
| ATOM | 56 | CA   | ILE | 4 | 8.115  | 33.730 | 14.411 | 0.00 | 0.00 |  |
| ATOM | 57 | HA   | ILE | 4 | 9.121  | 33.959 | 14.674 | 0.00 | 0.00 |  |
| ATOM | 58 | CB   | ILE | 4 | 8.103  | 33.389 | 12.930 | 0.00 | 0.00 |  |
| ATOM | 59 | HB   | ILE | 4 | 7.434  | 32.874 | 12.810 | 0.00 | 0.00 |  |
| ATOM | 60 | CG2  | ILE | 4 | 7.964  | 34.325 | 12.035 | 0.00 | 0.00 |  |
| ATOM | 61 | 1HG2 | ILE | 4 | 7.407  | 35.029 | 12.117 | 0.00 | 0.00 |  |
| ATOM | 62 | 2HG2 | ILE | 4 | 8.629  | 34.545 | 11.924 | 0.00 | 0.00 |  |
| ATOM | 63 | 3HG2 | ILE | 4 | 7.722  | 34.072 | 11.390 | 0.00 | 0.00 |  |
| ATOM | 64 | CG1  | ILE | 4 | 9.112  | 32.747 | 12.472 | 0.00 | 0.00 |  |
| ATOM | 65 | 2HG1 | ILE | 4 | 9.283  | 32.746 | 12.762 | 0.00 | 0.00 |  |
| ATOM | 66 | 3HG1 | ILE | 4 | 9.103  | 32.370 | 12.418 | 0.00 | 0.00 |  |
| ATOM | 67 | CD1  | ILE | 4 | 9.928  | 32.547 | 11.692 | 0.00 | 0.00 |  |

|      |     |      |     |    |        |        |        |      |      |
|------|-----|------|-----|----|--------|--------|--------|------|------|
| ATOM | 68  | 1HD1 | ILE | 4  | 10.202 | 32.545 | 11.580 | 0.00 | 0.00 |
| ATOM | 69  | 2HD1 | ILE | 4  | 10.091 | 32.363 | 11.541 | 0.00 | 0.00 |
| ATOM | 70  | 3HD1 | ILE | 4  | 10.086 | 32.591 | 11.385 | 0.00 | 0.00 |
| ATOM | 71  | C    | ILE | 4  | 7.307  | 34.966 | 14.748 | 0.00 | 0.00 |
| ATOM | 72  | O    | ILE | 4  | 7.787  | 36.065 | 14.591 | 0.00 | 0.00 |
| ATOM | 73  | N    | TRP | 5  | 6.107  | 34.820 | 15.283 | 0.00 | 0.00 |
| ATOM | 74  | H    | TRP | 5  | 5.784  | 33.900 | 15.438 | 0.00 | 0.00 |
| ATOM | 75  | CA   | TRP | 5  | 5.201  | 35.899 | 15.646 | 0.00 | 0.00 |
| ATOM | 76  | HA   | TRP | 5  | 5.303  | 36.671 | 14.918 | 0.00 | 0.00 |
| ATOM | 77  | CB   | TRP | 5  | 3.768  | 35.414 | 15.559 | 0.00 | 0.00 |
| ATOM | 78  | HB2  | TRP | 5  | 3.596  | 34.712 | 16.327 | 0.00 | 0.00 |
| ATOM | 79  | HB3  | TRP | 5  | 3.112  | 36.231 | 15.739 | 0.00 | 0.00 |
| ATOM | 80  | CG   | TRP | 5  | 3.347  | 34.790 | 14.300 | 0.00 | 0.00 |
| ATOM | 81  | CD1  | TRP | 5  | 3.740  | 35.066 | 13.145 | 0.00 | 0.00 |
| ATOM | 82  | HD1  | TRP | 5  | 4.408  | 35.779 | 12.977 | 0.00 | 0.00 |
| ATOM | 83  | NE1  | TRP | 5  | 3.171  | 34.292 | 12.218 | 0.00 | 0.00 |
| ATOM | 84  | HE1  | TRP | 5  | 3.341  | 34.327 | 11.304 | 0.00 | 0.00 |
| ATOM | 85  | CE2  | TRP | 5  | 2.368  | 33.469 | 12.729 | 0.00 | 0.00 |
| ATOM | 86  | CZ2  | TRP | 5  | 1.587  | 32.524 | 12.197 | 0.00 | 0.00 |
| ATOM | 87  | HZ2  | TRP | 5  | 1.568  | 32.319 | 11.200 | 0.00 | 0.00 |
| ATOM | 88  | CH2  | TRP | 5  | 0.845  | 31.856 | 12.984 | 0.00 | 0.00 |
| ATOM | 89  | HH2  | TRP | 5  | 0.242  | 31.128 | 12.591 | 0.00 | 0.00 |
| ATOM | 90  | CZ3  | TRP | 5  | 0.889  | 32.135 | 14.284 | 0.00 | 0.00 |
| ATOM | 91  | HZ3  | TRP | 5  | 0.317  | 31.628 | 14.887 | 0.00 | 0.00 |
| ATOM | 92  | CE3  | TRP | 5  | 1.678  | 33.086 | 14.813 | 0.00 | 0.00 |
| ATOM | 93  | HE3  | TRP | 5  | 1.708  | 33.295 | 15.813 | 0.00 | 0.00 |
| ATOM | 94  | CD2  | TRP | 5  | 2.447  | 33.776 | 14.051 | 0.00 | 0.00 |
| ATOM | 95  | C    | TRP | 5  | 5.537  | 36.554 | 16.984 | 0.00 | 0.00 |
| ATOM | 96  | O    | TRP | 5  | 4.697  | 36.757 | 17.819 | 0.00 | 0.00 |
| ATOM | 97  | N    | ILE | 6  | 6.789  | 36.859 | 17.193 | 0.00 | 0.00 |
| ATOM | 98  | H    | ILE | 6  | 7.403  | 36.601 | 16.472 | 0.00 | 0.00 |
| ATOM | 99  | CA   | ILE | 6  | 7.357  | 37.506 | 18.375 | 0.00 | 0.00 |
| ATOM | 100 | HA   | ILE | 6  | 6.552  | 37.761 | 19.039 | 0.00 | 0.00 |
| ATOM | 101 | CB   | ILE | 6  | 8.263  | 36.508 | 19.103 | 0.00 | 0.00 |
| ATOM | 102 | HB   | ILE | 6  | 7.750  | 35.571 | 19.115 | 0.00 | 0.00 |
| ATOM | 103 | CG2  | ILE | 6  | 9.565  | 36.286 | 18.363 | 0.00 | 0.00 |
| ATOM | 104 | 1HG2 | ILE | 6  | 9.832  | 36.502 | 17.981 | 0.00 | 0.00 |
| ATOM | 105 | 2HG2 | ILE | 6  | 10.067 | 36.262 | 18.482 | 0.00 | 0.00 |
| ATOM | 106 | 3HG2 | ILE | 6  | 9.752  | 35.905 | 18.097 | 0.00 | 0.00 |
| ATOM | 107 | CG1  | ILE | 6  | 8.528  | 36.886 | 20.551 | 0.00 | 0.00 |
| ATOM | 108 | 2HG1 | ILE | 6  | 9.189  | 37.243 | 20.718 | 0.00 | 0.00 |
| ATOM | 109 | 3HG1 | ILE | 6  | 8.033  | 37.368 | 20.850 | 0.00 | 0.00 |
| ATOM | 110 | CD1  | ILE | 6  | 8.566  | 36.127 | 21.420 | 0.00 | 0.00 |
| ATOM | 111 | 1HD1 | ILE | 6  | 8.703  | 35.926 | 21.530 | 0.00 | 0.00 |
| ATOM | 112 | 2HD1 | ILE | 6  | 8.632  | 36.084 | 21.714 | 0.00 | 0.00 |
| ATOM | 113 | 3HD1 | ILE | 6  | 8.386  | 35.834 | 21.654 | 0.00 | 0.00 |
| ATOM | 114 | C    | ILE | 6  | 8.056  | 38.827 | 18.052 | 0.00 | 0.00 |
| ATOM | 115 | O    | ILE | 6  | 8.405  | 39.574 | 18.941 | 0.00 | 0.00 |
| ATOM | 116 | N    | ALA | 7  | 8.249  | 39.161 | 16.784 | 0.00 | 0.00 |
| ATOM | 117 | H    | ALA | 7  | 7.887  | 38.568 | 16.085 | 0.00 | 0.00 |
| ATOM | 118 | CA   | ALA | 7  | 9.004  | 40.332 | 16.371 | 0.00 | 0.00 |
| ATOM | 119 | HA   | ALA | 7  | 9.970  | 40.275 | 16.831 | 0.00 | 0.00 |
| ATOM | 120 | CB   | ALA | 7  | 9.226  | 40.266 | 14.883 | 0.00 | 0.00 |
| ATOM | 121 | HB1  | ALA | 7  | 8.964  | 40.276 | 14.489 | 0.00 | 0.00 |
| ATOM | 122 | HB2  | ALA | 7  | 9.456  | 40.525 | 14.549 | 0.00 | 0.00 |
| ATOM | 123 | HB3  | ALA | 7  | 9.426  | 39.968 | 14.550 | 0.00 | 0.00 |
| ATOM | 124 | C    | ALA | 7  | 8.387  | 41.671 | 16.794 | 0.00 | 0.00 |
| ATOM | 125 | O    | ALA | 7  | 9.104  | 42.643 | 16.946 | 0.00 | 0.00 |
| ATOM | 126 | N    | GLN | 8  | 7.084  | 41.724 | 17.059 | 0.00 | 0.00 |
| ATOM | 127 | H    | GLN | 8  | 6.545  | 40.903 | 16.901 | 0.00 | 0.00 |
| ATOM | 128 | CA   | GLN | 8  | 6.416  | 42.893 | 17.621 | 0.00 | 0.00 |
| ATOM | 129 | HA   | GLN | 8  | 6.668  | 43.735 | 16.997 | 0.00 | 0.00 |
| ATOM | 130 | CB   | GLN | 8  | 4.893  | 42.738 | 17.553 | 0.00 | 0.00 |
| ATOM | 131 | HB2  | GLN | 8  | 4.472  | 43.697 | 17.761 | 0.00 | 0.00 |
| ATOM | 132 | HB3  | GLN | 8  | 4.604  | 42.484 | 16.552 | 0.00 | 0.00 |
| ATOM | 133 | CG   | GLN | 8  | 4.234  | 41.752 | 18.510 | 0.00 | 0.00 |
| ATOM | 134 | HG2  | GLN | 8  | 4.540  | 41.965 | 19.502 | 0.00 | 0.00 |
| ATOM | 135 | HG3  | GLN | 8  | 3.180  | 41.905 | 18.485 | 0.00 | 0.00 |
| ATOM | 136 | CD   | GLN | 8  | 4.477  | 40.310 | 18.224 | 0.00 | 0.00 |
| ATOM | 137 | OE1  | GLN | 8  | 5.006  | 39.917 | 17.495 | 0.00 | 0.00 |
| ATOM | 138 | NE2  | GLN | 8  | 4.105  | 39.460 | 18.786 | 0.00 | 0.00 |
| ATOM | 139 | 1HE2 | GLN | 8  | 4.245  | 38.510 | 18.593 | 0.00 | 0.00 |
| ATOM | 140 | 2HE2 | GLN | 8  | 3.653  | 39.746 | 19.385 | 0.00 | 0.00 |
| ATOM | 141 | C    | GLN | 8  | 6.911  | 43.246 | 19.027 | 0.00 | 0.00 |
| ATOM | 142 | O    | GLN | 8  | 6.983  | 44.413 | 19.361 | 0.00 | 0.00 |
| ATOM | 143 | N    | GLU | 9  | 7.327  | 42.274 | 19.831 | 0.00 | 0.00 |
| ATOM | 144 | H    | GLU | 9  | 7.284  | 41.338 | 19.505 | 0.00 | 0.00 |
| ATOM | 145 | CA   | GLU | 9  | 7.952  | 42.516 | 21.133 | 0.00 | 0.00 |
| ATOM | 146 | HA   | GLU | 9  | 7.397  | 43.289 | 21.642 | 0.00 | 0.00 |
| ATOM | 147 | CB   | GLU | 9  | 7.886  | 41.244 | 21.974 | 0.00 | 0.00 |
| ATOM | 148 | HB2  | GLU | 9  | 6.891  | 40.859 | 21.945 | 0.00 | 0.00 |
| ATOM | 149 | HB3  | GLU | 9  | 8.532  | 40.519 | 21.532 | 0.00 | 0.00 |
| ATOM | 150 | CG   | GLU | 9  | 8.304  | 41.411 | 23.424 | 0.00 | 0.00 |
| ATOM | 151 | HG2  | GLU | 9  | 8.377  | 40.448 | 23.869 | 0.00 | 0.00 |
| ATOM | 152 | HG3  | GLU | 9  | 9.263  | 41.841 | 23.470 | 0.00 | 0.00 |
| ATOM | 153 | CD   | GLU | 9  | 7.352  | 42.216 | 24.244 | 0.00 | 0.00 |
| ATOM | 154 | OE1  | GLU | 9  | 6.657  | 42.593 | 24.196 | 0.00 | 0.00 |
| ATOM | 155 | OE2  | GLU | 9  | 7.277  | 42.469 | 24.983 | 0.00 | 0.00 |
| ATOM | 156 | C    | GLU | 9  | 9.387  | 43.014 | 20.977 | 0.00 | 0.00 |
| ATOM | 157 | O    | GLU | 9  | 9.795  | 43.940 | 21.655 | 0.00 | 0.00 |
| ATOM | 158 | N    | LEU | 10 | 10.133 | 42.473 | 20.014 | 0.00 | 0.00 |
| ATOM | 159 | H    | LEU | 10 | 9.733  | 41.728 | 19.495 | 0.00 | 0.00 |
| ATOM | 160 | CA   | LEU | 10 | 11.493 | 42.911 | 19.684 | 0.00 | 0.00 |
| ATOM | 161 | HA   | LEU | 10 | 12.071 | 42.891 | 20.597 | 0.00 | 0.00 |
| ATOM | 162 | CB   | LEU | 10 | 12.092 | 41.897 | 18.700 | 0.00 | 0.00 |
| ATOM | 163 | HB2  | LEU | 10 | 11.939 | 40.910 | 19.086 | 0.00 | 0.00 |
| ATOM | 164 | HB3  | LEU | 10 | 11.550 | 41.961 | 17.781 | 0.00 | 0.00 |
| ATOM | 165 | CG   | LEU | 10 | 13.574 | 42.058 | 18.375 | 0.00 | 0.00 |
| ATOM | 166 | HG   | LEU | 10 | 13.726 | 43.020 | 17.954 | 0.00 | 0.00 |
| ATOM | 167 | CD1  | LEU | 10 | 14.469 | 41.929 | 19.566 | 0.00 | 0.00 |
| ATOM | 168 | 1HD1 | LEU | 10 | 14.797 | 42.197 | 19.799 | 0.00 | 0.00 |
| ATOM | 169 | 2HD1 | LEU | 10 | 14.440 | 41.857 | 20.032 | 0.00 | 0.00 |
| ATOM | 170 | 3HD1 | LEU | 10 | 14.848 | 41.661 | 19.722 | 0.00 | 0.00 |
| ATOM | 171 | CD2  | LEU | 10 | 13.999 | 41.018 | 17.362 | 0.00 | 0.00 |
| ATOM | 172 | 1HD2 | LEU | 10 | 14.473 | 40.881 | 17.159 | 0.00 | 0.00 |

|      |     |      |     |    |        |        |        |      |      |
|------|-----|------|-----|----|--------|--------|--------|------|------|
| ATOM | 173 | ZHD2 | LEU | 10 | 13.961 | 40.483 | 17.336 | 0.00 | 0.00 |
| ATOM | 174 | 3HD2 | LEU | 10 | 13.882 | 40.933 | 16.847 | 0.00 | 0.00 |
| ATOM | 175 | C    | LEU | 10 | 11.520 | 44.361 | 19.166 | 0.00 | 0.00 |
| ATOM | 176 | O    | LEU | 10 | 12.393 | 45.127 | 19.536 | 0.00 | 0.00 |
| ATOM | 177 | N    | ARG | 11 | 10.510 | 44.771 | 18.391 | 0.00 | 0.00 |
| ATOM | 178 | H    | ARG | 11 | 9.862  | 44.078 | 18.087 | 0.00 | 0.00 |
| ATOM | 179 | CA   | ARG | 11 | 10.269 | 46.179 | 18.039 | 0.00 | 0.00 |
| ATOM | 180 | HA   | ARG | 11 | 11.183 | 46.599 | 17.641 | 0.00 | 0.00 |
| ATOM | 181 | CB   | ARG | 11 | 9.167  | 46.315 | 16.983 | 0.00 | 0.00 |
| ATOM | 182 | HB2  | ARG | 11 | 8.296  | 45.772 | 17.302 | 0.00 | 0.00 |
| ATOM | 183 | HB3  | ARG | 11 | 8.898  | 47.354 | 16.907 | 0.00 | 0.00 |
| ATOM | 184 | CG   | ARG | 11 | 9.569  | 45.828 | 15.595 | 0.00 | 0.00 |
| ATOM | 185 | HG2  | ARG | 11 | 10.506 | 46.279 | 15.340 | 0.00 | 0.00 |
| ATOM | 186 | HG3  | ARG | 11 | 9.696  | 44.765 | 15.598 | 0.00 | 0.00 |
| ATOM | 187 | CD   | ARG | 11 | 8.581  | 46.206 | 14.502 | 0.00 | 0.00 |
| ATOM | 188 | HD2  | ARG | 11 | 8.498  | 47.273 | 14.473 | 0.00 | 0.00 |
| ATOM | 189 | HD3  | ARG | 11 | 8.965  | 45.897 | 13.546 | 0.00 | 0.00 |
| ATOM | 190 | NE   | ARG | 11 | 7.244  | 45.661 | 14.712 | 0.00 | 0.00 |
| ATOM | 191 | HE   | ARG | 11 | 6.635  | 46.199 | 15.262 | 0.00 | 0.00 |
| ATOM | 192 | CZ   | ARG | 11 | 6.692  | 44.628 | 14.159 | 0.00 | 0.00 |
| ATOM | 193 | NH1  | ARG | 11 | 7.324  | 43.825 | 13.408 | 0.00 | 0.00 |
| ATOM | 194 | 1HH1 | ARG | 11 | 8.274  | 43.981 | 13.201 | 0.00 | 0.00 |
| ATOM | 195 | 2HH1 | ARG | 11 | 6.831  | 43.099 | 12.971 | 0.00 | 0.00 |
| ATOM | 196 | NH2  | ARG | 11 | 5.457  | 44.371 | 14.358 | 0.00 | 0.00 |
| ATOM | 197 | 1HH2 | ARG | 11 | 4.908  | 45.002 | 14.864 | 0.00 | 0.00 |
| ATOM | 198 | 2HH2 | ARG | 11 | 5.040  | 43.604 | 13.926 | 0.00 | 0.00 |
| ATOM | 199 | C    | ARG | 11 | 9.926  | 47.026 | 19.259 | 0.00 | 0.00 |
| ATOM | 200 | O    | ARG | 11 | 10.512 | 48.079 | 19.423 | 0.00 | 0.00 |
| ATOM | 201 | N    | ARG | 12 | 9.037  | 46.562 | 20.132 | 0.00 | 0.00 |
| ATOM | 202 | H    | ARG | 12 | 8.621  | 45.686 | 19.923 | 0.00 | 0.00 |
| ATOM | 203 | CA   | ARG | 12 | 8.558  | 47.300 | 21.313 | 0.00 | 0.00 |
| ATOM | 204 | HA   | ARG | 12 | 8.159  | 48.246 | 20.976 | 0.00 | 0.00 |
| ATOM | 205 | CB   | ARG | 12 | 7.435  | 46.519 | 21.999 | 0.00 | 0.00 |
| ATOM | 206 | HB2  | ARG | 12 | 6.729  | 46.196 | 21.264 | 0.00 | 0.00 |
| ATOM | 207 | HB3  | ARG | 12 | 7.839  | 45.646 | 22.467 | 0.00 | 0.00 |
| ATOM | 208 | CG   | ARG | 12 | 6.696  | 47.356 | 23.025 | 0.00 | 0.00 |
| ATOM | 209 | HG2  | ARG | 12 | 7.391  | 47.838 | 23.665 | 0.00 | 0.00 |
| ATOM | 210 | HG3  | ARG | 12 | 6.148  | 48.106 | 22.517 | 0.00 | 0.00 |
| ATOM | 211 | CD   | ARG | 12 | 5.728  | 46.561 | 23.873 | 0.00 | 0.00 |
| ATOM | 212 | HD2  | ARG | 12 | 5.136  | 47.228 | 24.457 | 0.00 | 0.00 |
| ATOM | 213 | HD3  | ARG | 12 | 5.070  | 46.025 | 23.240 | 0.00 | 0.00 |
| ATOM | 214 | NE   | ARG | 12 | 6.399  | 45.624 | 24.736 | 0.00 | 0.00 |
| ATOM | 215 | HE   | ARG | 12 | 6.440  | 44.692 | 24.465 | 0.00 | 0.00 |
| ATOM | 216 | CZ   | ARG | 12 | 6.982  | 45.862 | 25.818 | 0.00 | 0.00 |
| ATOM | 217 | NH1  | ARG | 12 | 7.013  | 46.998 | 26.315 | 0.00 | 0.00 |
| ATOM | 218 | 1HH1 | ARG | 12 | 6.555  | 47.748 | 25.917 | 0.00 | 0.00 |
| ATOM | 219 | 2HH1 | ARG | 12 | 7.491  | 47.113 | 27.123 | 0.00 | 0.00 |
| ATOM | 220 | NH2  | ARG | 12 | 7.569  | 44.933 | 26.423 | 0.00 | 0.00 |
| ATOM | 221 | 1HH2 | ARG | 12 | 7.566  | 44.042 | 26.066 | 0.00 | 0.00 |
| ATOM | 222 | 2HH2 | ARG | 12 | 8.022  | 45.109 | 27.232 | 0.00 | 0.00 |
| ATOM | 223 | C    | ARG | 12 | 9.673  | 47.636 | 22.285 | 0.00 | 0.00 |
| ATOM | 224 | O    | ARG | 12 | 9.752  | 48.774 | 22.714 | 0.00 | 0.00 |
| ATOM | 225 | N    | ILE | 13 | 10.558 | 46.696 | 22.608 | 0.00 | 0.00 |
| ATOM | 226 | H    | ILE | 13 | 10.418 | 45.775 | 22.251 | 0.00 | 0.00 |
| ATOM | 227 | CA   | ILE | 13 | 11.692 | 46.953 | 23.506 | 0.00 | 0.00 |
| ATOM | 228 | HA   | ILE | 13 | 11.314 | 47.504 | 24.355 | 0.00 | 0.00 |
| ATOM | 229 | CB   | ILE | 13 | 12.298 | 45.660 | 24.080 | 0.00 | 0.00 |
| ATOM | 230 | HB   | ILE | 13 | 13.072 | 45.982 | 24.757 | 0.00 | 0.00 |
| ATOM | 231 | CG2  | ILE | 13 | 11.246 | 44.929 | 24.911 | 0.00 | 0.00 |
| ATOM | 232 | 1HG2 | ILE | 13 | 10.671 | 44.984 | 24.915 | 0.00 | 0.00 |
| ATOM | 233 | 2HG2 | ILE | 13 | 11.120 | 44.360 | 24.949 | 0.00 | 0.00 |
| ATOM | 234 | 3HG2 | ILE | 13 | 11.170 | 44.902 | 25.498 | 0.00 | 0.00 |
| ATOM | 235 | CG1  | ILE | 13 | 12.952 | 44.748 | 23.038 | 0.00 | 0.00 |
| ATOM | 236 | 2HG1 | ILE | 13 | 12.247 | 44.384 | 22.398 | 0.00 | 0.00 |
| ATOM | 237 | 3HG1 | ILE | 13 | 13.622 | 45.278 | 22.479 | 0.00 | 0.00 |
| ATOM | 238 | CD1  | ILE | 13 | 13.703 | 43.609 | 23.561 | 0.00 | 0.00 |
| ATOM | 239 | 1HD1 | ILE | 13 | 13.932 | 43.354 | 23.683 | 0.00 | 0.00 |
| ATOM | 240 | 2HD1 | ILE | 13 | 13.856 | 43.339 | 23.705 | 0.00 | 0.00 |
| ATOM | 241 | 3HD1 | ILE | 13 | 13.883 | 43.308 | 23.656 | 0.00 | 0.00 |
| ATOM | 242 | C    | ILE | 13 | 12.748 | 47.861 | 22.875 | 0.00 | 0.00 |
| ATOM | 243 | O    | ILE | 13 | 13.312 | 48.687 | 23.562 | 0.00 | 0.00 |
| ATOM | 244 | N    | GLY | 14 | 12.958 | 47.778 | 21.566 | 0.00 | 0.00 |
| ATOM | 245 | H    | GLY | 14 | 12.470 | 47.082 | 21.055 | 0.00 | 0.00 |
| ATOM | 246 | CA   | GLY | 14 | 13.801 | 48.711 | 20.833 | 0.00 | 0.00 |
| ATOM | 247 | HA2  | GLY | 14 | 14.781 | 48.720 | 21.272 | 0.00 | 0.00 |
| ATOM | 248 | HA3  | GLY | 14 | 13.886 | 48.377 | 19.817 | 0.00 | 0.00 |
| ATOM | 249 | C    | GLY | 14 | 13.251 | 50.131 | 20.815 | 0.00 | 0.00 |
| ATOM | 250 | O    | GLY | 14 | 13.968 | 51.072 | 21.090 | 0.00 | 0.00 |
| ATOM | 251 | N    | ASP | 15 | 11.957 | 50.295 | 20.579 | 0.00 | 0.00 |
| ATOM | 252 | H    | ASP | 15 | 11.424 | 49.489 | 20.341 | 0.00 | 0.00 |
| ATOM | 253 | CA   | ASP | 15 | 11.283 | 51.592 | 20.588 | 0.00 | 0.00 |
| ATOM | 254 | HA   | ASP | 15 | 11.865 | 52.282 | 19.992 | 0.00 | 0.00 |
| ATOM | 255 | CB   | ASP | 15 | 9.897  | 51.462 | 19.963 | 0.00 | 0.00 |
| ATOM | 256 | HB2  | ASP | 15 | 9.396  | 50.669 | 20.392 | 0.00 | 0.00 |
| ATOM | 257 | HB3  | ASP | 15 | 9.352  | 52.316 | 20.164 | 0.00 | 0.00 |
| ATOM | 258 | CG   | ASP | 15 | 9.877  | 51.294 | 18.495 | 0.00 | 0.00 |
| ATOM | 259 | OD1  | ASP | 15 | 10.707 | 51.611 | 17.781 | 0.00 | 0.00 |
| ATOM | 260 | OD2  | ASP | 15 | 8.987  | 50.894 | 18.011 | 0.00 | 0.00 |
| ATOM | 261 | C    | ASP | 15 | 11.176 | 52.195 | 21.995 | 0.00 | 0.00 |
| ATOM | 262 | O    | ASP | 15 | 11.237 | 53.400 | 22.145 | 0.00 | 0.00 |
| ATOM | 263 | N    | GLU | 16 | 11.063 | 51.386 | 23.042 | 0.00 | 0.00 |
| ATOM | 264 | H    | GLU | 16 | 10.988 | 50.414 | 22.861 | 0.00 | 0.00 |
| ATOM | 265 | CA   | GLU | 16 | 11.064 | 51.851 | 24.431 | 0.00 | 0.00 |
| ATOM | 266 | HA   | GLU | 16 | 10.414 | 52.713 | 24.489 | 0.00 | 0.00 |
| ATOM | 267 | CB   | GLU | 16 | 10.480 | 50.778 | 25.358 | 0.00 | 0.00 |
| ATOM | 268 | HB2  | GLU | 16 | 9.573  | 50.406 | 24.936 | 0.00 | 0.00 |
| ATOM | 269 | HB3  | GLU | 16 | 11.162 | 49.963 | 25.453 | 0.00 | 0.00 |
| ATOM | 270 | CG   | GLU | 16 | 10.160 | 51.334 | 26.730 | 0.00 | 0.00 |
| ATOM | 271 | HG2  | GLU | 16 | 11.051 | 51.678 | 27.185 | 0.00 | 0.00 |
| ATOM | 272 | HG3  | GLU | 16 | 9.515  | 52.163 | 26.611 | 0.00 | 0.00 |
| ATOM | 273 | CD   | GLU | 16 | 9.491  | 50.317 | 27.632 | 0.00 | 0.00 |
| ATOM | 274 | OE1  | GLU | 16 | 10.147 | 49.654 | 28.389 | 0.00 | 0.00 |
| ATOM | 275 | OE2  | GLU | 16 | 8.300  | 50.195 | 27.608 | 0.00 | 0.00 |
| ATOM | 276 | C    | GLU | 16 | 12.458 | 52.304 | 24.872 | 0.00 | 0.00 |
| ATOM | 277 | O    | GLU | 16 | 12.592 | 53.356 | 25.482 | 0.00 | 0.00 |

|      |     |      |     |    |        |        |        |      |      |
|------|-----|------|-----|----|--------|--------|--------|------|------|
| ATOM | 278 | N    | PHE | 17 | 13.509 | 51.585 | 24.495 | 0.00 | 0.00 |
| ATOM | 279 | H    | PHE | 17 | 13.358 | 50.726 | 24.014 | 0.00 | 0.00 |
| ATOM | 280 | CA   | PHE | 17 | 14.882 | 52.040 | 24.706 | 0.00 | 0.00 |
| ATOM | 281 | HA   | PHE | 17 | 14.994 | 52.297 | 25.750 | 0.00 | 0.00 |
| ATOM | 282 | CB   | PHE | 17 | 15.864 | 50.916 | 24.386 | 0.00 | 0.00 |
| ATOM | 283 | HB2  | PHE | 17 | 15.575 | 50.033 | 24.916 | 0.00 | 0.00 |
| ATOM | 284 | HB3  | PHE | 17 | 15.820 | 50.677 | 23.345 | 0.00 | 0.00 |
| ATOM | 285 | CG   | PHE | 17 | 17.283 | 51.240 | 24.753 | 0.00 | 0.00 |
| ATOM | 286 | CD1  | PHE | 17 | 17.731 | 51.051 | 26.035 | 0.00 | 0.00 |
| ATOM | 287 | HD1  | PHE | 17 | 17.081 | 50.659 | 26.756 | 0.00 | 0.00 |
| ATOM | 288 | CE1  | PHE | 17 | 19.030 | 51.371 | 26.386 | 0.00 | 0.00 |
| ATOM | 289 | HE1  | PHE | 17 | 19.371 | 51.208 | 27.364 | 0.00 | 0.00 |
| ATOM | 290 | CZ   | PHE | 17 | 19.889 | 51.884 | 25.461 | 0.00 | 0.00 |
| ATOM | 291 | HZ   | PHE | 17 | 20.879 | 52.127 | 25.727 | 0.00 | 0.00 |
| ATOM | 292 | CE2  | PHE | 17 | 19.449 | 52.083 | 24.182 | 0.00 | 0.00 |
| ATOM | 293 | HE2  | PHE | 17 | 20.106 | 52.487 | 23.478 | 0.00 | 0.00 |
| ATOM | 294 | CD2  | PHE | 17 | 18.149 | 51.758 | 23.828 | 0.00 | 0.00 |
| ATOM | 295 | HD2  | PHE | 17 | 17.809 | 51.917 | 22.853 | 0.00 | 0.00 |
| ATOM | 296 | C    | PHE | 17 | 15.192 | 53.305 | 23.910 | 0.00 | 0.00 |
| ATOM | 297 | O    | PHE | 17 | 15.879 | 54.181 | 24.410 | 0.00 | 0.00 |
| ATOM | 298 | N    | ASN | 18 | 14.644 | 53.463 | 22.709 | 0.00 | 0.00 |
| ATOM | 299 | H    | ASN | 18 | 14.124 | 52.704 | 22.329 | 0.00 | 0.00 |
| ATOM | 300 | CA   | ASN | 18 | 14.779 | 54.681 | 21.916 | 0.00 | 0.00 |
| ATOM | 301 | HA   | ASN | 18 | 15.829 | 54.904 | 21.829 | 0.00 | 0.00 |
| ATOM | 302 | CB   | ASN | 18 | 14.229 | 54.436 | 20.513 | 0.00 | 0.00 |
| ATOM | 303 | HB2  | ASN | 18 | 14.570 | 53.497 | 20.136 | 0.00 | 0.00 |
| ATOM | 304 | HB3  | ASN | 18 | 13.164 | 54.395 | 20.539 | 0.00 | 0.00 |
| ATOM | 305 | CG   | ASN | 18 | 14.665 | 55.490 | 19.537 | 0.00 | 0.00 |
| ATOM | 306 | OD1  | ASN | 18 | 15.789 | 55.626 | 19.221 | 0.00 | 0.00 |
| ATOM | 307 | ND2  | ASN | 18 | 13.814 | 56.268 | 19.058 | 0.00 | 0.00 |
| ATOM | 308 | 1HD2 | ASN | 18 | 14.086 | 56.971 | 18.427 | 0.00 | 0.00 |
| ATOM | 309 | 2HD2 | ASN | 18 | 12.895 | 56.146 | 19.303 | 0.00 | 0.00 |
| ATOM | 310 | C    | ASN | 18 | 14.109 | 55.882 | 22.582 | 0.00 | 0.00 |
| ATOM | 311 | O    | ASN | 18 | 14.649 | 56.964 | 22.565 | 0.00 | 0.00 |
| ATOM | 312 | N    | ALA | 19 | 12.985 | 55.697 | 23.243 | 0.00 | 0.00 |
| ATOM | 313 | H    | ALA | 19 | 12.586 | 54.797 | 23.221 | 0.00 | 0.00 |
| ATOM | 314 | CA   | ALA | 19 | 12.294 | 56.735 | 23.989 | 0.00 | 0.00 |
| ATOM | 315 | HA   | ALA | 19 | 12.199 | 57.598 | 23.367 | 0.00 | 0.00 |
| ATOM | 316 | CB   | ALA | 19 | 10.900 | 56.269 | 24.327 | 0.00 | 0.00 |
| ATOM | 317 | HB1  | ALA | 19 | 10.810 | 55.724 | 24.790 | 0.00 | 0.00 |
| ATOM | 318 | HB2  | ALA | 19 | 10.413 | 56.743 | 24.627 | 0.00 | 0.00 |
| ATOM | 319 | HB3  | ALA | 19 | 10.454 | 56.025 | 23.796 | 0.00 | 0.00 |
| ATOM | 320 | C    | ALA | 19 | 13.056 | 57.165 | 25.230 | 0.00 | 0.00 |
| ATOM | 321 | O    | ALA | 19 | 13.119 | 58.313 | 25.535 | 0.00 | 0.00 |
| ATOM | 322 | N    | TYR | 20 | 13.710 | 56.273 | 25.909 | 0.00 | 0.00 |
| ATOM | 323 | H    | TYR | 20 | 13.593 | 55.344 | 25.643 | 0.00 | 0.00 |
| ATOM | 324 | CA   | TYR | 20 | 14.588 | 56.576 | 27.026 | 0.00 | 0.00 |
| ATOM | 325 | HA   | TYR | 20 | 14.127 | 57.330 | 27.611 | 0.00 | 0.00 |
| ATOM | 326 | CB   | TYR | 20 | 14.727 | 55.363 | 27.900 | 0.00 | 0.00 |
| ATOM | 327 | HB2  | TYR | 20 | 14.880 | 54.508 | 27.309 | 0.00 | 0.00 |
| ATOM | 328 | HB3  | TYR | 20 | 15.590 | 55.500 | 28.487 | 0.00 | 0.00 |
| ATOM | 329 | CG   | TYR | 20 | 13.589 | 55.091 | 28.808 | 0.00 | 0.00 |
| ATOM | 330 | CD1  | TYR | 20 | 12.737 | 54.081 | 28.613 | 0.00 | 0.00 |
| ATOM | 331 | HD1  | TYR | 20 | 12.887 | 53.501 | 27.822 | 0.00 | 0.00 |
| ATOM | 332 | CE1  | TYR | 20 | 11.697 | 53.820 | 29.461 | 0.00 | 0.00 |
| ATOM | 333 | HE1  | TYR | 20 | 11.054 | 53.048 | 29.312 | 0.00 | 0.00 |
| ATOM | 334 | CZ   | TYR | 20 | 11.506 | 54.561 | 30.511 | 0.00 | 0.00 |
| ATOM | 335 | OH   | TYR | 20 | 10.513 | 54.305 | 31.334 | 0.00 | 0.00 |
| ATOM | 336 | HH   | TYR | 20 | 10.020 | 53.594 | 31.098 | 0.00 | 0.00 |
| ATOM | 337 | CE2  | TYR | 20 | 12.357 | 55.576 | 30.711 | 0.00 | 0.00 |
| ATOM | 338 | HE2  | TYR | 20 | 12.210 | 56.137 | 31.513 | 0.00 | 0.00 |
| ATOM | 339 | CD2  | TYR | 20 | 13.396 | 55.837 | 29.868 | 0.00 | 0.00 |
| ATOM | 340 | HD2  | TYR | 20 | 14.049 | 56.601 | 30.032 | 0.00 | 0.00 |
| ATOM | 341 | C    | TYR | 20 | 15.945 | 57.150 | 26.626 | 0.00 | 0.00 |
| ATOM | 342 | O    | TYR | 20 | 16.563 | 57.795 | 27.419 | 0.00 | 0.00 |
| ATOM | 343 | N    | TYR | 21 | 16.386 | 56.988 | 25.397 | 0.00 | 0.00 |
| ATOM | 344 | H    | TYR | 21 | 15.858 | 56.434 | 24.792 | 0.00 | 0.00 |
| ATOM | 345 | CA   | TYR | 21 | 17.600 | 57.565 | 24.892 | 0.00 | 0.00 |
| ATOM | 346 | HA   | TYR | 21 | 18.348 | 57.438 | 25.624 | 0.00 | 0.00 |
| ATOM | 347 | CB   | TYR | 21 | 18.045 | 56.837 | 23.645 | 0.00 | 0.00 |
| ATOM | 348 | HB2  | TYR | 21 | 17.981 | 55.844 | 23.766 | 0.00 | 0.00 |
| ATOM | 349 | HB3  | TYR | 21 | 17.445 | 57.050 | 22.882 | 0.00 | 0.00 |
| ATOM | 350 | CG   | TYR | 21 | 19.361 | 57.090 | 23.223 | 0.00 | 0.00 |
| ATOM | 351 | CD1  | TYR | 21 | 20.330 | 56.477 | 23.737 | 0.00 | 0.00 |
| ATOM | 352 | HD1  | TYR | 21 | 20.136 | 55.836 | 24.429 | 0.00 | 0.00 |
| ATOM | 353 | CE1  | TYR | 21 | 21.544 | 56.710 | 23.356 | 0.00 | 0.00 |
| ATOM | 354 | HE1  | TYR | 21 | 22.287 | 56.247 | 23.753 | 0.00 | 0.00 |
| ATOM | 355 | CZ   | TYR | 21 | 21.797 | 57.551 | 22.447 | 0.00 | 0.00 |
| ATOM | 356 | OH   | TYR | 21 | 22.962 | 57.753 | 22.066 | 0.00 | 0.00 |
| ATOM | 357 | HH   | TYR | 21 | 23.347 | 58.274 | 21.723 | 0.00 | 0.00 |
| ATOM | 358 | CE2  | TYR | 21 | 20.832 | 58.166 | 21.935 | 0.00 | 0.00 |
| ATOM | 359 | HE2  | TYR | 21 | 21.031 | 58.812 | 21.253 | 0.00 | 0.00 |
| ATOM | 360 | CD2  | TYR | 21 | 19.618 | 57.938 | 22.324 | 0.00 | 0.00 |
| ATOM | 361 | HD2  | TYR | 21 | 18.887 | 58.409 | 21.925 | 0.00 | 0.00 |
| ATOM | 362 | C    | TYR | 21 | 17.470 | 59.034 | 24.671 | 0.00 | 0.00 |
| ATOM | 363 | O    | TYR | 21 | 18.356 | 59.759 | 24.968 | 0.00 | 0.00 |
| ATOM | 364 | N    | ALA | 22 | 16.344 | 59.495 | 24.240 | 0.00 | 0.00 |
| ATOM | 365 | H    | ALA | 22 | 15.659 | 58.856 | 24.004 | 0.00 | 0.00 |
| ATOM | 366 | CA   | ALA | 22 | 16.056 | 60.877 | 24.079 | 0.00 | 0.00 |
| ATOM | 367 | HA   | ALA | 22 | 16.854 | 61.320 | 23.562 | 0.00 | 0.00 |
| ATOM | 368 | CB   | ALA | 22 | 14.865 | 61.010 | 23.225 | 0.00 | 0.00 |
| ATOM | 369 | HB1  | ALA | 22 | 14.822 | 61.016 | 22.612 | 0.00 | 0.00 |
| ATOM | 370 | HB2  | ALA | 22 | 14.415 | 60.653 | 23.213 | 0.00 | 0.00 |
| ATOM | 371 | HB3  | ALA | 22 | 14.492 | 61.466 | 23.216 | 0.00 | 0.00 |
| ATOM | 372 | C    | ALA | 22 | 15.893 | 61.608 | 25.386 | 0.00 | 0.00 |
| ATOM | 373 | O    | ALA | 22 | 16.064 | 62.764 | 25.447 | 0.00 | 0.00 |
| ATOM | 374 | N    | ARG | 23 | 15.601 | 60.936 | 26.455 | 0.00 | 0.00 |
| ATOM | 375 | H    | ARG | 23 | 15.423 | 60.005 | 26.311 | 0.00 | 0.00 |
| ATOM | 376 | CA   | ARG | 23 | 15.481 | 61.454 | 27.795 | 0.00 | 0.00 |
| ATOM | 377 | HA   | ARG | 23 | 15.147 | 62.443 | 27.743 | 0.00 | 0.00 |
| ATOM | 378 | CB   | ARG | 23 | 14.478 | 60.661 | 28.555 | 0.00 | 0.00 |
| ATOM | 379 | HB2  | ARG | 23 | 14.722 | 59.671 | 28.497 | 0.00 | 0.00 |
| ATOM | 380 | HB3  | ARG | 23 | 14.511 | 60.931 | 29.557 | 0.00 | 0.00 |
| ATOM | 381 | CG   | ARG | 23 | 13.110 | 60.848 | 28.083 | 0.00 | 0.00 |
| ATOM | 382 | HG2  | ARG | 23 | 12.807 | 61.702 | 28.177 | 0.00 | 0.00 |



|      |     |      |     |    |        |        |        |      |      |
|------|-----|------|-----|----|--------|--------|--------|------|------|
| ATOM | 383 | HG3  | ARG | 23 | 13.016 | 60.680 | 27.205 | 0.00 | 0.00 |
| ATOM | 384 | CD   | ARG | 23 | 12.267 | 60.103 | 28.676 | 0.00 | 0.00 |
| ATOM | 385 | HD2  | ARG | 23 | 11.958 | 59.857 | 28.509 | 0.00 | 0.00 |
| ATOM | 386 | HD3  | ARG | 23 | 12.479 | 59.761 | 28.841 | 0.00 | 0.00 |
| ATOM | 387 | NE   | ARG | 23 | 11.577 | 60.165 | 29.222 | 0.00 | 0.00 |
| ATOM | 388 | HE   | ARG | 23 | 11.669 | 60.592 | 29.204 | 0.00 | 0.00 |
| ATOM | 389 | CZ   | ARG | 23 | 10.824 | 59.716 | 29.733 | 0.00 | 0.00 |
| ATOM | 390 | NH1  | ARG | 23 | 10.580 | 59.145 | 29.836 | 0.00 | 0.00 |
| ATOM | 391 | 1HH1 | ARG | 23 | 10.949 | 59.037 | 29.532 | 0.00 | 0.00 |
| ATOM | 392 | 2HH1 | ARG | 23 | 10.010 | 58.827 | 30.237 | 0.00 | 0.00 |
| ATOM | 393 | NH2  | ARG | 23 | 10.285 | 59.835 | 30.168 | 0.00 | 0.00 |
| ATOM | 394 | 1HH2 | ARG | 23 | 10.442 | 60.265 | 30.113 | 0.00 | 0.00 |
| ATOM | 395 | 2HH2 | ARG | 23 | 9.725  | 59.498 | 30.556 | 0.00 | 0.00 |
| ATOM | 396 | C    | ARG | 23 | 16.767 | 61.526 | 28.536 | 0.00 | 0.00 |
| ATOM | 397 | O    | ARG | 23 | 16.813 | 61.934 | 29.582 | 0.00 | 0.00 |
| ATOM | 398 | N    | ARG | 24 | 17.812 | 61.133 | 28.010 | 0.00 | 0.00 |
| ATOM | 399 | H    | ARG | 24 | 17.689 | 60.832 | 27.147 | 0.00 | 0.00 |
| ATOM | 400 | CA   | ARG | 24 | 19.122 | 61.127 | 28.582 | 0.00 | 0.00 |
| ATOM | 401 | HA   | ARG | 24 | 19.059 | 61.344 | 29.547 | 0.00 | 0.00 |
| ATOM | 402 | CB   | ARG | 24 | 19.741 | 59.865 | 28.485 | 0.00 | 0.00 |
| ATOM | 403 | HB2  | ARG | 24 | 20.726 | 59.915 | 28.831 | 0.00 | 0.00 |
| ATOM | 404 | HB3  | ARG | 24 | 19.759 | 59.598 | 27.534 | 0.00 | 0.00 |
| ATOM | 405 | CG   | ARG | 24 | 19.041 | 58.897 | 29.231 | 0.00 | 0.00 |
| ATOM | 406 | HG2  | ARG | 24 | 18.060 | 58.798 | 28.903 | 0.00 | 0.00 |
| ATOM | 407 | HG3  | ARG | 24 | 19.020 | 59.181 | 30.163 | 0.00 | 0.00 |
| ATOM | 408 | CD   | ARG | 24 | 19.694 | 57.682 | 29.180 | 0.00 | 0.00 |
| ATOM | 409 | HD2  | ARG | 24 | 19.877 | 57.520 | 29.768 | 0.00 | 0.00 |
| ATOM | 410 | HD3  | ARG | 24 | 20.213 | 57.828 | 28.838 | 0.00 | 0.00 |
| ATOM | 411 | NE   | ARG | 24 | 19.376 | 56.555 | 28.807 | 0.00 | 0.00 |
| ATOM | 412 | HE   | ARG | 24 | 18.755 | 56.636 | 28.312 | 0.00 | 0.00 |
| ATOM | 413 | CZ   | ARG | 24 | 19.837 | 55.433 | 29.071 | 0.00 | 0.00 |
| ATOM | 414 | NH1  | ARG | 24 | 20.650 | 55.157 | 29.712 | 0.00 | 0.00 |
| ATOM | 415 | 1HH1 | ARG | 24 | 20.971 | 55.810 | 30.039 | 0.00 | 0.00 |
| ATOM | 416 | 2HH1 | ARG | 24 | 20.970 | 54.298 | 29.866 | 0.00 | 0.00 |
| ATOM | 417 | NH2  | ARG | 24 | 19.479 | 54.527 | 28.701 | 0.00 | 0.00 |
| ATOM | 418 | 1HH2 | ARG | 24 | 18.871 | 54.655 | 28.175 | 0.00 | 0.00 |
| ATOM | 419 | 2HH2 | ARG | 24 | 19.829 | 53.687 | 28.959 | 0.00 | 0.00 |
| ATOM | 420 | C    | ARG | 24 | 19.987 | 62.097 | 28.037 | 0.00 | 0.00 |
| ATOM | 421 | O    | ARG | 24 | 20.172 | 62.536 | 27.362 | 0.00 | 0.00 |
| TER  |     |      |     |    |        |        |        |      |      |
| MOL2 |     |      |     |    |        |        |        |      |      |
| ATOM | 422 | N    | SER | 25 | 32.304 | 56.891 | 7.008  | 0.00 | 0.00 |
| ATOM | 423 | H    | SER | 25 | 32.921 | 56.749 | 7.078  | 0.00 | 0.00 |
| ATOM | 424 | CA   | SER | 25 | 31.540 | 57.668 | 6.964  | 0.00 | 0.00 |
| ATOM | 425 | HA   | SER | 25 | 30.953 | 57.375 | 7.459  | 0.00 | 0.00 |
| ATOM | 426 | CB   | SER | 25 | 32.009 | 58.640 | 7.609  | 0.00 | 0.00 |
| ATOM | 427 | HB2  | SER | 25 | 31.842 | 59.186 | 7.340  | 0.00 | 0.00 |
| ATOM | 428 | HB3  | SER | 25 | 31.853 | 58.724 | 8.218  | 0.00 | 0.00 |
| ATOM | 429 | OG   | SER | 25 | 32.843 | 58.737 | 7.786  | 0.00 | 0.00 |
| ATOM | 430 | HG   | SER | 25 | 33.131 | 59.029 | 7.981  | 0.00 | 0.00 |
| ATOM | 431 | C    | SER | 25 | 31.024 | 57.924 | 5.659  | 0.00 | 0.00 |
| ATOM | 432 | O    | SER | 25 | 30.164 | 58.468 | 5.554  | 0.00 | 0.00 |
| ATOM | 433 | N    | ALA | 26 | 31.528 | 57.530 | 4.659  | 0.00 | 0.00 |
| ATOM | 434 | H    | ALA | 26 | 32.247 | 57.099 | 4.820  | 0.00 | 0.00 |
| ATOM | 435 | CA   | ALA | 26 | 31.165 | 57.786 | 3.359  | 0.00 | 0.00 |
| ATOM | 436 | HA   | ALA | 26 | 30.427 | 58.452 | 3.381  | 0.00 | 0.00 |
| ATOM | 437 | CB   | ALA | 26 | 32.259 | 58.419 | 2.750  | 0.00 | 0.00 |
| ATOM | 438 | HB1  | ALA | 26 | 32.443 | 58.578 | 2.556  | 0.00 | 0.00 |
| ATOM | 439 | HB2  | ALA | 26 | 32.555 | 58.642 | 2.668  | 0.00 | 0.00 |
| ATOM | 440 | HB3  | ALA | 26 | 32.556 | 58.504 | 2.586  | 0.00 | 0.00 |
| ATOM | 441 | C    | ALA | 26 | 30.673 | 56.604 | 2.551  | 0.00 | 0.00 |
| ATOM | 442 | O    | ALA | 26 | 29.973 | 56.739 | 1.679  | 0.00 | 0.00 |
| ATOM | 443 | N    | SER | 27 | 31.014 | 55.454 | 2.827  | 0.00 | 0.00 |
| ATOM | 444 | H    | SER | 27 | 31.600 | 55.410 | 3.548  | 0.00 | 0.00 |
| ATOM | 445 | CA   | SER | 27 | 30.588 | 54.261 | 2.150  | 0.00 | 0.00 |
| ATOM | 446 | HA   | SER | 27 | 29.794 | 54.506 | 1.484  | 0.00 | 0.00 |
| ATOM | 447 | CB   | SER | 27 | 31.705 | 53.719 | 1.324  | 0.00 | 0.00 |
| ATOM | 448 | HB2  | SER | 27 | 32.130 | 54.114 | 0.999  | 0.00 | 0.00 |
| ATOM | 449 | HB3  | SER | 27 | 32.229 | 53.330 | 1.551  | 0.00 | 0.00 |
| ATOM | 450 | OG   | SER | 27 | 31.551 | 53.216 | 0.686  | 0.00 | 0.00 |
| ATOM | 451 | HG   | SER | 27 | 31.793 | 53.130 | 0.170  | 0.00 | 0.00 |
| ATOM | 452 | C    | SER | 27 | 30.092 | 53.199 | 3.111  | 0.00 | 0.00 |
| ATOM | 453 | O    | SER | 27 | 30.796 | 52.803 | 4.010  | 0.00 | 0.00 |
| ATOM | 454 | N    | GLU | 28 | 28.888 | 52.694 | 2.898  | 0.00 | 0.00 |
| ATOM | 455 | H    | GLU | 28 | 28.363 | 53.067 | 2.151  | 0.00 | 0.00 |
| ATOM | 456 | CA   | GLU | 28 | 28.280 | 51.635 | 3.703  | 0.00 | 0.00 |
| ATOM | 457 | HA   | GLU | 28 | 28.246 | 51.973 | 4.727  | 0.00 | 0.00 |
| ATOM | 458 | CB   | GLU | 28 | 26.837 | 51.421 | 3.248  | 0.00 | 0.00 |
| ATOM | 459 | HB2  | GLU | 28 | 26.363 | 50.749 | 3.933  | 0.00 | 0.00 |
| ATOM | 460 | HB3  | GLU | 28 | 26.320 | 52.355 | 3.314  | 0.00 | 0.00 |
| ATOM | 461 | CG   | GLU | 28 | 26.666 | 50.877 | 1.840  | 0.00 | 0.00 |
| ATOM | 462 | HG2  | GLU | 28 | 27.278 | 51.431 | 1.173  | 0.00 | 0.00 |
| ATOM | 463 | HG3  | GLU | 28 | 27.007 | 49.874 | 1.813  | 0.00 | 0.00 |
| ATOM | 464 | CD   | GLU | 28 | 25.235 | 50.932 | 1.371  | 0.00 | 0.00 |
| ATOM | 465 | OE1  | GLU | 28 | 24.912 | 51.759 | 0.595  | 0.00 | 0.00 |
| ATOM | 466 | OE2  | GLU | 28 | 24.405 | 50.161 | 1.770  | 0.00 | 0.00 |
| ATOM | 467 | C    | GLU | 28 | 29.075 | 50.329 | 3.711  | 0.00 | 0.00 |
| ATOM | 468 | O    | GLU | 28 | 29.134 | 49.659 | 4.722  | 0.00 | 0.00 |
| ATOM | 469 | N    | GLU | 29 | 29.757 | 49.998 | 2.625  | 0.00 | 0.00 |
| ATOM | 470 | H    | GLU | 29 | 29.708 | 50.611 | 1.848  | 0.00 | 0.00 |
| ATOM | 471 | CA   | GLU | 29 | 30.594 | 48.806 | 2.519  | 0.00 | 0.00 |
| ATOM | 472 | HA   | GLU | 29 | 30.040 | 47.957 | 2.879  | 0.00 | 0.00 |
| ATOM | 473 | CB   | GLU | 29 | 30.969 | 48.557 | 1.069  | 0.00 | 0.00 |
| ATOM | 474 | HB2  | GLU | 29 | 31.224 | 49.307 | 0.660  | 0.00 | 0.00 |
| ATOM | 475 | HB3  | GLU | 29 | 31.673 | 47.995 | 0.982  | 0.00 | 0.00 |
| ATOM | 476 | CG   | GLU | 29 | 30.071 | 48.041 | 0.302  | 0.00 | 0.00 |
| ATOM | 477 | HG2  | GLU | 29 | 29.824 | 47.304 | 0.699  | 0.00 | 0.00 |
| ATOM | 478 | HG3  | GLU | 29 | 29.375 | 48.582 | 0.386  | 0.00 | 0.00 |
| ATOM | 479 | CD   | GLU | 29 | 30.442 | 47.787 | -1.107 | 0.00 | 0.00 |
| ATOM | 480 | OE1  | GLU | 29 | 30.579 | 47.585 | -1.664 | 0.00 | 0.00 |
| ATOM | 481 | OE2  | GLU | 29 | 30.590 | 47.782 | -1.680 | 0.00 | 0.00 |
| ATOM | 482 | C    | GLU | 29 | 31.855 | 48.898 | 3.381  | 0.00 | 0.00 |
| ATOM | 483 | O    | GLU | 29 | 32.306 | 47.915 | 3.893  | 0.00 | 0.00 |
| ATOM | 484 | N    | GLN | 30 | 32.387 | 50.082 | 3.596  | 0.00 | 0.00 |
| ATOM | 485 | H    | GLN | 30 | 31.942 | 50.849 | 3.183  | 0.00 | 0.00 |

|      |     |      |     |    |        |        |        |      |      |
|------|-----|------|-----|----|--------|--------|--------|------|------|
| ATOM | 486 | CA   | GLN | 30 | 33.520 | 50.331 | 4.484  | 0.00 | 0.00 |
| ATOM | 487 | HA   | GLN | 30 | 34.182 | 49.485 | 4.444  | 0.00 | 0.00 |
| ATOM | 488 | CB   | GLN | 30 | 34.294 | 51.558 | 4.023  | 0.00 | 0.00 |
| ATOM | 489 | HB2  | GLN | 30 | 33.649 | 52.397 | 4.039  | 0.00 | 0.00 |
| ATOM | 490 | HB3  | GLN | 30 | 35.086 | 51.744 | 4.712  | 0.00 | 0.00 |
| ATOM | 491 | CG   | GLN | 30 | 34.885 | 51.449 | 2.642  | 0.00 | 0.00 |
| ATOM | 492 | HG2  | GLN | 30 | 34.127 | 51.325 | 1.939  | 0.00 | 0.00 |
| ATOM | 493 | HG3  | GLN | 30 | 35.372 | 52.346 | 2.405  | 0.00 | 0.00 |
| ATOM | 494 | CD   | GLN | 30 | 35.848 | 50.372 | 2.494  | 0.00 | 0.00 |
| ATOM | 495 | OE1  | GLN | 30 | 36.078 | 49.708 | 2.644  | 0.00 | 0.00 |
| ATOM | 496 | NE2  | GLN | 30 | 36.442 | 50.146 | 2.194  | 0.00 | 0.00 |
| ATOM | 497 | 1HE2 | GLN | 30 | 37.070 | 49.443 | 2.100  | 0.00 | 0.00 |
| ATOM | 498 | 2HE2 | GLN | 30 | 36.272 | 50.671 | 2.061  | 0.00 | 0.00 |
| ATOM | 499 | C    | GLN | 30 | 33.090 | 50.450 | 5.941  | 0.00 | 0.00 |
| ATOM | 500 | O    | GLN | 30 | 33.792 | 49.989 | 6.819  | 0.00 | 0.00 |
| ATOM | 501 | N    | VAL | 31 | 31.899 | 50.981 | 6.211  | 0.00 | 0.00 |
| ATOM | 502 | H    | VAL | 31 | 31.391 | 51.374 | 5.455  | 0.00 | 0.00 |
| ATOM | 503 | CA   | VAL | 31 | 31.289 | 50.972 | 7.542  | 0.00 | 0.00 |
| ATOM | 504 | HA   | VAL | 31 | 32.011 | 51.358 | 8.245  | 0.00 | 0.00 |
| ATOM | 505 | CB   | VAL | 31 | 30.057 | 51.887 | 7.595  | 0.00 | 0.00 |
| ATOM | 506 | HB   | VAL | 31 | 29.391 | 51.636 | 6.794  | 0.00 | 0.00 |
| ATOM | 507 | CG1  | VAL | 31 | 29.290 | 51.780 | 8.889  | 0.00 | 0.00 |
| ATOM | 508 | 1HG1 | VAL | 31 | 29.133 | 51.384 | 9.205  | 0.00 | 0.00 |
| ATOM | 509 | 2HG1 | VAL | 31 | 29.349 | 51.975 | 9.384  | 0.00 | 0.00 |
| ATOM | 510 | 3HG1 | VAL | 31 | 28.800 | 51.915 | 9.016  | 0.00 | 0.00 |
| ATOM | 511 | CG2  | VAL | 31 | 30.463 | 53.335 | 7.443  | 0.00 | 0.00 |
| ATOM | 512 | 1HG2 | VAL | 31 | 30.573 | 53.665 | 7.208  | 0.00 | 0.00 |
| ATOM | 513 | 2HG2 | VAL | 31 | 30.374 | 53.754 | 7.480  | 0.00 | 0.00 |
| ATOM | 514 | 3HG2 | VAL | 31 | 30.723 | 53.654 | 7.534  | 0.00 | 0.00 |
| ATOM | 515 | C    | VAL | 31 | 30.976 | 49.554 | 8.000  | 0.00 | 0.00 |
| ATOM | 516 | O    | VAL | 31 | 31.158 | 49.253 | 9.163  | 0.00 | 0.00 |
| ATOM | 517 | N    | ALA | 32 | 30.589 | 48.643 | 7.116  | 0.00 | 0.00 |
| ATOM | 518 | H    | ALA | 32 | 30.383 | 48.937 | 6.192  | 0.00 | 0.00 |
| ATOM | 519 | CA   | ALA | 32 | 30.428 | 47.232 | 7.444  | 0.00 | 0.00 |
| ATOM | 520 | HA   | ALA | 32 | 29.758 | 47.153 | 8.283  | 0.00 | 0.00 |
| ATOM | 521 | CB   | ALA | 32 | 29.760 | 46.529 | 6.278  | 0.00 | 0.00 |
| ATOM | 522 | HB1  | ALA | 32 | 29.872 | 46.555 | 5.705  | 0.00 | 0.00 |
| ATOM | 523 | HB2  | ALA | 32 | 29.705 | 45.958 | 6.180  | 0.00 | 0.00 |
| ATOM | 524 | HB3  | ALA | 32 | 29.215 | 46.558 | 6.111  | 0.00 | 0.00 |
| ATOM | 525 | C    | ALA | 32 | 31.742 | 46.562 | 7.858  | 0.00 | 0.00 |
| ATOM | 526 | O    | ALA | 32 | 31.729 | 45.749 | 8.741  | 0.00 | 0.00 |
| ATOM | 527 | N    | GLN | 33 | 32.880 | 46.947 | 7.300  | 0.00 | 0.00 |
| ATOM | 528 | H    | GLN | 33 | 32.835 | 47.620 | 6.586  | 0.00 | 0.00 |
| ATOM | 529 | CA   | GLN | 33 | 34.196 | 46.465 | 7.724  | 0.00 | 0.00 |
| ATOM | 530 | HA   | GLN | 33 | 34.136 | 45.395 | 7.848  | 0.00 | 0.00 |
| ATOM | 531 | CB   | GLN | 33 | 35.255 | 46.766 | 6.663  | 0.00 | 0.00 |
| ATOM | 532 | HB2  | GLN | 33 | 35.340 | 47.811 | 6.530  | 0.00 | 0.00 |
| ATOM | 533 | HB3  | GLN | 33 | 36.192 | 46.423 | 7.015  | 0.00 | 0.00 |
| ATOM | 534 | CG   | GLN | 33 | 35.032 | 46.154 | 5.307  | 0.00 | 0.00 |
| ATOM | 535 | HG2  | GLN | 33 | 34.214 | 46.541 | 4.887  | 0.00 | 0.00 |
| ATOM | 536 | HG3  | GLN | 33 | 35.813 | 46.372 | 4.685  | 0.00 | 0.00 |
| ATOM | 537 | CD   | GLN | 33 | 34.892 | 44.739 | 5.317  | 0.00 | 0.00 |
| ATOM | 538 | OE1  | GLN | 33 | 34.256 | 43.995 | 5.511  | 0.00 | 0.00 |
| ATOM | 539 | NE2  | GLN | 33 | 35.461 | 44.322 | 5.115  | 0.00 | 0.00 |
| ATOM | 540 | 1HE2 | GLN | 33 | 35.980 | 44.919 | 4.971  | 0.00 | 0.00 |
| ATOM | 541 | 2HE2 | GLN | 33 | 35.366 | 43.406 | 5.135  | 0.00 | 0.00 |
| ATOM | 542 | C    | GLN | 33 | 34.620 | 47.028 | 9.080  | 0.00 | 0.00 |
| ATOM | 543 | O    | GLN | 33 | 35.170 | 46.311 | 9.885  | 0.00 | 0.00 |
| ATOM | 544 | N    | ASP | 34 | 34.326 | 48.285 | 9.376  | 0.00 | 0.00 |
| ATOM | 545 | H    | ASP | 34 | 33.927 | 48.845 | 8.666  | 0.00 | 0.00 |
| ATOM | 546 | CA   | ASP | 34 | 34.554 | 48.880 | 10.698 | 0.00 | 0.00 |
| ATOM | 547 | HA   | ASP | 34 | 35.569 | 48.708 | 11.008 | 0.00 | 0.00 |
| ATOM | 548 | CB   | ASP | 34 | 34.305 | 50.384 | 10.660 | 0.00 | 0.00 |
| ATOM | 549 | HB2  | ASP | 34 | 33.341 | 50.571 | 10.242 | 0.00 | 0.00 |
| ATOM | 550 | HB3  | ASP | 34 | 34.294 | 50.755 | 11.667 | 0.00 | 0.00 |
| ATOM | 551 | CG   | ASP | 34 | 35.331 | 51.178 | 9.900  | 0.00 | 0.00 |
| ATOM | 552 | OD1  | ASP | 34 | 36.455 | 50.779 | 9.758  | 0.00 | 0.00 |
| ATOM | 553 | OD2  | ASP | 34 | 35.013 | 52.238 | 9.458  | 0.00 | 0.00 |
| ATOM | 554 | C    | ASP | 34 | 33.662 | 48.253 | 11.765 | 0.00 | 0.00 |
| ATOM | 555 | O    | ASP | 34 | 34.097 | 48.020 | 12.878 | 0.00 | 0.00 |
| ATOM | 556 | N    | THR | 35 | 32.425 | 47.915 | 11.416 | 0.00 | 0.00 |
| ATOM | 557 | H    | THR | 35 | 32.137 | 48.137 | 10.489 | 0.00 | 0.00 |
| ATOM | 558 | CA   | THR | 35 | 31.463 | 47.282 | 12.318 | 0.00 | 0.00 |
| ATOM | 559 | HA   | THR | 35 | 31.380 | 47.903 | 13.198 | 0.00 | 0.00 |
| ATOM | 560 | CB   | THR | 35 | 30.069 | 47.183 | 11.691 | 0.00 | 0.00 |
| ATOM | 561 | HB   | THR | 35 | 30.086 | 46.466 | 10.886 | 0.00 | 0.00 |
| ATOM | 562 | CG2  | THR | 35 | 28.997 | 46.789 | 12.684 | 0.00 | 0.00 |
| ATOM | 563 | 1HG2 | THR | 35 | 28.824 | 46.551 | 12.967 | 0.00 | 0.00 |
| ATOM | 564 | 2HG2 | THR | 35 | 28.765 | 46.844 | 13.012 | 0.00 | 0.00 |
| ATOM | 565 | 3HG2 | THR | 35 | 28.610 | 46.684 | 12.800 | 0.00 | 0.00 |
| ATOM | 566 | OG1  | THR | 35 | 29.640 | 48.416 | 11.190 | 0.00 | 0.00 |
| ATOM | 567 | HG1  | THR | 35 | 30.190 | 48.656 | 10.473 | 0.00 | 0.00 |
| ATOM | 568 | C    | THR | 35 | 31.925 | 45.905 | 12.785 | 0.00 | 0.00 |
| ATOM | 569 | O    | THR | 35 | 31.596 | 45.509 | 13.885 | 0.00 | 0.00 |
| ATOM | 570 | N    | GLU | 36 | 32.741 | 45.188 | 12.019 | 0.00 | 0.00 |
| ATOM | 571 | H    | GLU | 36 | 32.999 | 45.551 | 11.131 | 0.00 | 0.00 |
| ATOM | 572 | CA   | GLU | 36 | 33.335 | 43.922 | 12.447 | 0.00 | 0.00 |
| ATOM | 573 | HA   | GLU | 36 | 32.547 | 43.277 | 12.802 | 0.00 | 0.00 |
| ATOM | 574 | CB   | GLU | 36 | 34.016 | 43.243 | 11.269 | 0.00 | 0.00 |
| ATOM | 575 | HB2  | GLU | 36 | 33.849 | 43.560 | 10.557 | 0.00 | 0.00 |
| ATOM | 576 | HB3  | GLU | 36 | 34.806 | 43.280 | 11.294 | 0.00 | 0.00 |
| ATOM | 577 | CG   | GLU | 36 | 33.866 | 42.081 | 11.011 | 0.00 | 0.00 |
| ATOM | 578 | HG2  | GLU | 36 | 33.936 | 41.801 | 11.754 | 0.00 | 0.00 |
| ATOM | 579 | HG3  | GLU | 36 | 33.115 | 42.034 | 10.865 | 0.00 | 0.00 |
| ATOM | 580 | CD   | GLU | 36 | 34.639 | 41.359 | 9.957  | 0.00 | 0.00 |
| ATOM | 581 | OE1  | GLU | 36 | 35.482 | 41.202 | 9.924  | 0.00 | 0.00 |
| ATOM | 582 | OE2  | GLU | 36 | 34.419 | 40.934 | 9.153  | 0.00 | 0.00 |
| ATOM | 583 | C    | GLU | 36 | 34.319 | 44.101 | 13.607 | 0.00 | 0.00 |
| ATOM | 584 | O    | GLU | 36 | 34.304 | 43.331 | 14.540 | 0.00 | 0.00 |
| ATOM | 585 | N    | GLU | 37 | 35.134 | 45.145 | 13.589 | 0.00 | 0.00 |
| ATOM | 586 | H    | GLU | 37 | 35.062 | 45.772 | 12.830 | 0.00 | 0.00 |
| ATOM | 587 | CA   | GLU | 37 | 36.062 | 45.467 | 14.671 | 0.00 | 0.00 |
| ATOM | 588 | HA   | GLU | 37 | 36.564 | 44.562 | 14.979 | 0.00 | 0.00 |
| ATOM | 589 | CB   | GLU | 37 | 37.123 | 46.445 | 14.176 | 0.00 | 0.00 |
| ATOM | 590 | HB2  | GLU | 37 | 37.013 | 46.799 | 13.635 | 0.00 | 0.00 |

|      |     |      |     |    |        |        |        |      |      |
|------|-----|------|-----|----|--------|--------|--------|------|------|
| ATOM | 591 | HB3  | GLU | 37 | 37.344 | 46.971 | 14.545 | 0.00 | 0.00 |
| ATOM | 592 | CG   | GLU | 37 | 38.064 | 46.226 | 13.919 | 0.00 | 0.00 |
| ATOM | 593 | HG2  | GLU | 37 | 38.202 | 45.945 | 14.332 | 0.00 | 0.00 |
| ATOM | 594 | HG3  | GLU | 37 | 37.754 | 45.811 | 13.626 | 0.00 | 0.00 |
| ATOM | 595 | CD   | GLU | 37 | 39.237 | 46.937 | 13.516 | 0.00 | 0.00 |
| ATOM | 596 | OE1  | GLU | 37 | 40.164 | 47.026 | 14.171 | 0.00 | 0.00 |
| ATOM | 597 | OE2  | GLU | 37 | 39.258 | 47.402 | 12.554 | 0.00 | 0.00 |
| ATOM | 598 | C    | GLU | 37 | 35.342 | 46.015 | 15.909 | 0.00 | 0.00 |
| ATOM | 599 | O    | GLU | 37 | 35.688 | 45.658 | 17.026 | 0.00 | 0.00 |
| ATOM | 600 | N    | VAL | 38 | 34.292 | 46.808 | 15.717 | 0.00 | 0.00 |
| ATOM | 601 | H    | VAL | 38 | 34.081 | 47.076 | 14.782 | 0.00 | 0.00 |
| ATOM | 602 | CA   | VAL | 38 | 33.404 | 47.258 | 16.797 | 0.00 | 0.00 |
| ATOM | 603 | HA   | VAL | 38 | 34.009 | 47.711 | 17.570 | 0.00 | 0.00 |
| ATOM | 604 | CB   | VAL | 38 | 32.388 | 48.304 | 16.303 | 0.00 | 0.00 |
| ATOM | 605 | HB   | VAL | 38 | 31.863 | 47.917 | 15.462 | 0.00 | 0.00 |
| ATOM | 606 | CG1  | VAL | 38 | 31.358 | 48.688 | 17.336 | 0.00 | 0.00 |
| ATOM | 607 | 1HG1 | VAL | 38 | 31.175 | 48.490 | 17.740 | 0.00 | 0.00 |
| ATOM | 608 | 2HG1 | VAL | 38 | 31.295 | 49.061 | 17.651 | 0.00 | 0.00 |
| ATOM | 609 | 3HG1 | VAL | 38 | 30.846 | 48.801 | 17.360 | 0.00 | 0.00 |
| ATOM | 610 | CG2  | VAL | 38 | 33.072 | 49.572 | 15.884 | 0.00 | 0.00 |
| ATOM | 611 | 1HG2 | VAL | 38 | 33.448 | 49.729 | 15.677 | 0.00 | 0.00 |
| ATOM | 612 | 2HG2 | VAL | 38 | 33.028 | 49.948 | 15.607 | 0.00 | 0.00 |
| ATOM | 613 | 3HG2 | VAL | 38 | 33.239 | 49.973 | 16.037 | 0.00 | 0.00 |
| ATOM | 614 | C    | VAL | 38 | 32.694 | 46.071 | 17.443 | 0.00 | 0.00 |
| ATOM | 615 | O    | VAL | 38 | 32.696 | 45.973 | 18.659 | 0.00 | 0.00 |
| ATOM | 616 | N    | PHE | 39 | 32.133 | 45.144 | 16.670 | 0.00 | 0.00 |
| ATOM | 617 | H    | PHE | 39 | 32.164 | 45.272 | 15.682 | 0.00 | 0.00 |
| ATOM | 618 | CA   | PHE | 39 | 31.376 | 44.004 | 17.188 | 0.00 | 0.00 |
| ATOM | 619 | HA   | PHE | 39 | 30.660 | 44.385 | 17.904 | 0.00 | 0.00 |
| ATOM | 620 | CB   | PHE | 39 | 30.577 | 43.331 | 16.077 | 0.00 | 0.00 |
| ATOM | 621 | HB2  | PHE | 39 | 30.012 | 44.088 | 15.565 | 0.00 | 0.00 |
| ATOM | 622 | HB3  | PHE | 39 | 31.251 | 42.903 | 15.361 | 0.00 | 0.00 |
| ATOM | 623 | CG   | PHE | 39 | 29.605 | 42.282 | 16.565 | 0.00 | 0.00 |
| ATOM | 624 | CD1  | PHE | 39 | 28.394 | 42.632 | 17.088 | 0.00 | 0.00 |
| ATOM | 625 | HD1  | PHE | 39 | 28.157 | 43.643 | 17.131 | 0.00 | 0.00 |
| ATOM | 626 | CE1  | PHE | 39 | 27.504 | 41.660 | 17.544 | 0.00 | 0.00 |
| ATOM | 627 | HE1  | PHE | 39 | 26.580 | 41.930 | 17.929 | 0.00 | 0.00 |
| ATOM | 628 | CZ   | PHE | 39 | 27.827 | 40.336 | 17.486 | 0.00 | 0.00 |
| ATOM | 629 | HZ   | PHE | 39 | 27.146 | 39.591 | 17.827 | 0.00 | 0.00 |
| ATOM | 630 | CE2  | PHE | 39 | 29.029 | 39.985 | 16.970 | 0.00 | 0.00 |
| ATOM | 631 | HE2  | PHE | 39 | 29.271 | 38.974 | 16.921 | 0.00 | 0.00 |
| ATOM | 632 | CD2  | PHE | 39 | 29.917 | 40.958 | 16.519 | 0.00 | 0.00 |
| ATOM | 633 | HD2  | PHE | 39 | 30.838 | 40.683 | 16.129 | 0.00 | 0.00 |
| ATOM | 634 | C    | PHE | 39 | 32.257 | 43.002 | 17.941 | 0.00 | 0.00 |
| ATOM | 635 | O    | PHE | 39 | 31.895 | 42.598 | 19.036 | 0.00 | 0.00 |
| ATOM | 636 | N    | ARG | 40 | 33.442 | 42.657 | 17.424 | 0.00 | 0.00 |
| ATOM | 637 | H    | ARG | 40 | 33.684 | 43.008 | 16.525 | 0.00 | 0.00 |
| ATOM | 638 | CA   | ARG | 40 | 34.406 | 41.794 | 18.134 | 0.00 | 0.00 |
| ATOM | 639 | HA   | ARG | 40 | 33.927 | 40.858 | 18.373 | 0.00 | 0.00 |
| ATOM | 640 | CB   | ARG | 40 | 35.624 | 41.516 | 17.262 | 0.00 | 0.00 |
| ATOM | 641 | HB2  | ARG | 40 | 35.980 | 42.429 | 16.848 | 0.00 | 0.00 |
| ATOM | 642 | HB3  | ARG | 40 | 36.399 | 41.110 | 17.876 | 0.00 | 0.00 |
| ATOM | 643 | CG   | ARG | 40 | 35.356 | 40.535 | 16.146 | 0.00 | 0.00 |
| ATOM | 644 | HG2  | ARG | 40 | 35.076 | 39.617 | 16.558 | 0.00 | 0.00 |
| ATOM | 645 | HG3  | ARG | 40 | 34.564 | 40.872 | 15.535 | 0.00 | 0.00 |
| ATOM | 646 | CD   | ARG | 40 | 36.566 | 40.321 | 15.310 | 0.00 | 0.00 |
| ATOM | 647 | HD2  | ARG | 40 | 36.997 | 40.804 | 15.368 | 0.00 | 0.00 |
| ATOM | 648 | HD3  | ARG | 40 | 36.935 | 39.786 | 15.472 | 0.00 | 0.00 |
| ATOM | 649 | NE   | ARG | 40 | 36.661 | 40.154 | 14.222 | 0.00 | 0.00 |
| ATOM | 650 | HE   | ARG | 40 | 36.218 | 39.646 | 13.950 | 0.00 | 0.00 |
| ATOM | 651 | CZ   | ARG | 40 | 37.297 | 40.565 | 13.541 | 0.00 | 0.00 |
| ATOM | 652 | NH1  | ARG | 40 | 37.952 | 41.219 | 13.769 | 0.00 | 0.00 |
| ATOM | 653 | 1HH1 | ARG | 40 | 38.018 | 41.435 | 14.494 | 0.00 | 0.00 |
| ATOM | 654 | 2HH1 | ARG | 40 | 38.425 | 41.473 | 13.212 | 0.00 | 0.00 |
| ATOM | 655 | NH2  | ARG | 40 | 37.298 | 40.311 | 12.598 | 0.00 | 0.00 |
| ATOM | 656 | 1HH2 | ARG | 40 | 36.842 | 39.796 | 12.364 | 0.00 | 0.00 |
| ATOM | 657 | 2HH2 | ARG | 40 | 37.792 | 40.609 | 12.089 | 0.00 | 0.00 |
| ATOM | 658 | C    | ARG | 40 | 34.840 | 42.399 | 19.464 | 0.00 | 0.00 |
| ATOM | 659 | O    | ARG | 40 | 34.847 | 41.717 | 20.472 | 0.00 | 0.00 |
| ATOM | 660 | N    | SER | 41 | 35.125 | 43.692 | 19.485 | 0.00 | 0.00 |
| ATOM | 661 | H    | SER | 41 | 35.105 | 44.174 | 18.616 | 0.00 | 0.00 |
| ATOM | 662 | CA   | SER | 41 | 35.487 | 44.435 | 20.691 | 0.00 | 0.00 |
| ATOM | 663 | HA   | SER | 41 | 36.293 | 43.918 | 21.189 | 0.00 | 0.00 |
| ATOM | 664 | CB   | SER | 41 | 35.991 | 45.820 | 20.319 | 0.00 | 0.00 |
| ATOM | 665 | HB2  | SER | 41 | 35.196 | 46.395 | 19.890 | 0.00 | 0.00 |
| ATOM | 666 | HB3  | SER | 41 | 36.335 | 46.315 | 21.205 | 0.00 | 0.00 |
| ATOM | 667 | OG   | SER | 41 | 37.042 | 45.737 | 19.397 | 0.00 | 0.00 |
| ATOM | 668 | HG   | SER | 41 | 36.679 | 45.696 | 18.555 | 0.00 | 0.00 |
| ATOM | 669 | C    | SER | 41 | 34.327 | 44.537 | 21.683 | 0.00 | 0.00 |
| ATOM | 670 | O    | SER | 41 | 34.515 | 44.360 | 22.866 | 0.00 | 0.00 |
| ATOM | 671 | N    | TYR | 42 | 33.107 | 44.757 | 21.207 | 0.00 | 0.00 |
| ATOM | 672 | H    | TYR | 42 | 33.015 | 44.920 | 20.230 | 0.00 | 0.00 |
| ATOM | 673 | CA   | TYR | 42 | 31.876 | 44.776 | 21.998 | 0.00 | 0.00 |
| ATOM | 674 | HA   | TYR | 42 | 31.978 | 45.504 | 22.790 | 0.00 | 0.00 |
| ATOM | 675 | CB   | TYR | 42 | 30.731 | 45.226 | 21.091 | 0.00 | 0.00 |
| ATOM | 676 | HB2  | TYR | 42 | 30.841 | 46.275 | 20.908 | 0.00 | 0.00 |
| ATOM | 677 | HB3  | TYR | 42 | 30.839 | 44.747 | 20.139 | 0.00 | 0.00 |
| ATOM | 678 | CG   | TYR | 42 | 29.323 | 44.966 | 21.553 | 0.00 | 0.00 |
| ATOM | 679 | CD1  | TYR | 42 | 28.763 | 45.720 | 22.558 | 0.00 | 0.00 |
| ATOM | 680 | HD1  | TYR | 42 | 29.353 | 46.459 | 23.028 | 0.00 | 0.00 |
| ATOM | 681 | CE1  | TYR | 42 | 27.432 | 45.525 | 22.933 | 0.00 | 0.00 |
| ATOM | 682 | HE1  | TYR | 42 | 26.995 | 46.106 | 23.696 | 0.00 | 0.00 |
| ATOM | 683 | CZ   | TYR | 42 | 26.656 | 44.573 | 22.296 | 0.00 | 0.00 |
| ATOM | 684 | OH   | TYR | 42 | 25.374 | 44.385 | 22.651 | 0.00 | 0.00 |
| ATOM | 685 | HH   | TYR | 42 | 24.958 | 43.762 | 22.115 | 0.00 | 0.00 |
| ATOM | 686 | CE2  | TYR | 42 | 27.215 | 43.821 | 21.281 | 0.00 | 0.00 |
| ATOM | 687 | HE2  | TYR | 42 | 26.629 | 43.096 | 20.781 | 0.00 | 0.00 |
| ATOM | 688 | CD2  | TYR | 42 | 28.549 | 44.016 | 20.918 | 0.00 | 0.00 |
| ATOM | 689 | HD2  | TYR | 42 | 28.977 | 43.444 | 20.144 | 0.00 | 0.00 |
| ATOM | 690 | C    | TYR | 42 | 31.593 | 43.429 | 22.668 | 0.00 | 0.00 |
| ATOM | 691 | O    | TYR | 42 | 31.349 | 43.402 | 23.864 | 0.00 | 0.00 |
| ATOM | 692 | N    | VAL | 43 | 31.709 | 42.307 | 21.956 | 0.00 | 0.00 |
| ATOM | 693 | H    | VAL | 43 | 31.908 | 42.394 | 20.983 | 0.00 | 0.00 |
| ATOM | 694 | CA   | VAL | 43 | 31.550 | 40.960 | 22.528 | 0.00 | 0.00 |
| ATOM | 695 | HA   | VAL | 43 | 30.590 | 40.914 | 23.025 | 0.00 | 0.00 |

|      |     |      |     |    |        |        |        |      |      |
|------|-----|------|-----|----|--------|--------|--------|------|------|
| ATOM | 696 | CB   | VAL | 43 | 31.569 | 39.880 | 21.430 | 0.00 | 0.00 |
| ATOM | 697 | HB   | VAL | 43 | 32.460 | 40.005 | 20.838 | 0.00 | 0.00 |
| ATOM | 698 | CG1  | VAL | 43 | 31.581 | 38.459 | 21.976 | 0.00 | 0.00 |
| ATOM | 699 | 1HG1 | VAL | 43 | 31.638 | 37.803 | 21.296 | 0.00 | 0.00 |
| ATOM | 700 | 2HG1 | VAL | 43 | 32.320 | 38.269 | 22.540 | 0.00 | 0.00 |
| ATOM | 701 | 3HG1 | VAL | 43 | 30.811 | 38.242 | 22.475 | 0.00 | 0.00 |
| ATOM | 702 | CG2  | VAL | 43 | 30.361 | 39.989 | 20.505 | 0.00 | 0.00 |
| ATOM | 703 | 1HG2 | VAL | 43 | 30.120 | 39.911 | 20.201 | 0.00 | 0.00 |
| ATOM | 704 | 2HG2 | VAL | 43 | 29.979 | 39.998 | 20.373 | 0.00 | 0.00 |
| ATOM | 705 | 3HG2 | VAL | 43 | 30.106 | 40.146 | 20.241 | 0.00 | 0.00 |
| ATOM | 706 | C    | VAL | 43 | 32.601 | 40.691 | 23.607 | 0.00 | 0.00 |
| ATOM | 707 | O    | VAL | 43 | 32.267 | 40.168 | 24.661 | 0.00 | 0.00 |
| ATOM | 708 | N    | PHE | 44 | 33.850 | 41.103 | 23.387 | 0.00 | 0.00 |
| ATOM | 709 | H    | PHE | 44 | 34.071 | 41.506 | 22.505 | 0.00 | 0.00 |
| ATOM | 710 | CA   | PHE | 44 | 34.916 | 40.989 | 24.378 | 0.00 | 0.00 |
| ATOM | 711 | HA   | PHE | 44 | 34.980 | 39.955 | 24.687 | 0.00 | 0.00 |
| ATOM | 712 | CB   | PHE | 44 | 36.260 | 41.369 | 23.761 | 0.00 | 0.00 |
| ATOM | 713 | HB2  | PHE | 44 | 36.453 | 40.748 | 22.915 | 0.00 | 0.00 |
| ATOM | 714 | HB3  | PHE | 44 | 36.224 | 42.374 | 23.401 | 0.00 | 0.00 |
| ATOM | 715 | CG   | PHE | 44 | 37.420 | 41.252 | 24.704 | 0.00 | 0.00 |
| ATOM | 716 | CD1  | PHE | 44 | 38.086 | 40.079 | 24.839 | 0.00 | 0.00 |
| ATOM | 717 | HD1  | PHE | 44 | 37.795 | 39.268 | 24.258 | 0.00 | 0.00 |
| ATOM | 718 | CE1  | PHE | 44 | 39.133 | 39.964 | 25.729 | 0.00 | 0.00 |
| ATOM | 719 | HE1  | PHE | 44 | 39.638 | 39.067 | 25.820 | 0.00 | 0.00 |
| ATOM | 720 | CZ   | PHE | 44 | 39.522 | 41.019 | 26.492 | 0.00 | 0.00 |
| ATOM | 721 | HZ   | PHE | 44 | 40.325 | 40.940 | 27.171 | 0.00 | 0.00 |
| ATOM | 722 | CE2  | PHE | 44 | 38.867 | 42.193 | 26.359 | 0.00 | 0.00 |
| ATOM | 723 | HE2  | PHE | 44 | 39.169 | 43.007 | 26.933 | 0.00 | 0.00 |
| ATOM | 724 | CD2  | PHE | 44 | 37.821 | 42.315 | 25.466 | 0.00 | 0.00 |
| ATOM | 725 | HD2  | PHE | 44 | 37.335 | 43.225 | 25.357 | 0.00 | 0.00 |
| ATOM | 726 | C    | PHE | 44 | 34.628 | 41.815 | 25.638 | 0.00 | 0.00 |
| ATOM | 727 | O    | PHE | 44 | 34.643 | 41.271 | 26.730 | 0.00 | 0.00 |
| ATOM | 728 | N    | TYR | 45 | 34.321 | 43.101 | 25.504 | 0.00 | 0.00 |
| ATOM | 729 | H    | TYR | 45 | 34.330 | 43.497 | 24.589 | 0.00 | 0.00 |
| ATOM | 730 | CA   | TYR | 45 | 34.110 | 43.987 | 26.645 | 0.00 | 0.00 |
| ATOM | 731 | HA   | TYR | 45 | 34.900 | 43.790 | 27.356 | 0.00 | 0.00 |
| ATOM | 732 | CB   | TYR | 45 | 34.238 | 45.456 | 26.239 | 0.00 | 0.00 |
| ATOM | 733 | HB2  | TYR | 45 | 33.651 | 45.632 | 25.358 | 0.00 | 0.00 |
| ATOM | 734 | HB3  | TYR | 45 | 33.830 | 46.063 | 27.023 | 0.00 | 0.00 |
| ATOM | 735 | CG   | TYR | 45 | 35.654 | 45.911 | 26.008 | 0.00 | 0.00 |
| ATOM | 736 | CD1  | TYR | 45 | 36.569 | 45.869 | 27.038 | 0.00 | 0.00 |
| ATOM | 737 | HD1  | TYR | 45 | 36.266 | 45.543 | 27.997 | 0.00 | 0.00 |
| ATOM | 738 | CE1  | TYR | 45 | 37.883 | 46.259 | 26.826 | 0.00 | 0.00 |
| ATOM | 739 | HE1  | TYR | 45 | 38.576 | 46.214 | 27.615 | 0.00 | 0.00 |
| ATOM | 740 | CZ   | TYR | 45 | 38.296 | 46.708 | 25.587 | 0.00 | 0.00 |
| ATOM | 741 | OH   | TYR | 45 | 39.558 | 47.094 | 25.382 | 0.00 | 0.00 |
| ATOM | 742 | HH   | TYR | 45 | 40.081 | 46.976 | 26.134 | 0.00 | 0.00 |
| ATOM | 743 | CE2  | TYR | 45 | 37.379 | 46.778 | 24.560 | 0.00 | 0.00 |
| ATOM | 744 | HE2  | TYR | 45 | 37.688 | 47.135 | 23.616 | 0.00 | 0.00 |
| ATOM | 745 | CD2  | TYR | 45 | 36.063 | 46.385 | 24.771 | 0.00 | 0.00 |
| ATOM | 746 | HD2  | TYR | 45 | 35.367 | 46.446 | 23.983 | 0.00 | 0.00 |
| ATOM | 747 | C    | TYR | 45 | 32.819 | 43.691 | 27.406 | 0.00 | 0.00 |
| ATOM | 748 | O    | TYR | 45 | 32.829 | 43.750 | 28.622 | 0.00 | 0.00 |
| ATOM | 749 | N    | ARG | 46 | 31.736 | 43.265 | 26.748 | 0.00 | 0.00 |
| ATOM | 750 | H    | ARG | 46 | 31.772 | 43.238 | 25.753 | 0.00 | 0.00 |
| ATOM | 751 | CA   | ARG | 46 | 30.534 | 42.766 | 27.429 | 0.00 | 0.00 |
| ATOM | 752 | HA   | ARG | 46 | 30.201 | 43.512 | 28.141 | 0.00 | 0.00 |
| ATOM | 753 | CB   | ARG | 46 | 29.412 | 42.468 | 26.428 | 0.00 | 0.00 |
| ATOM | 754 | HB2  | ARG | 46 | 29.809 | 41.863 | 25.625 | 0.00 | 0.00 |
| ATOM | 755 | HB3  | ARG | 46 | 28.665 | 41.879 | 26.941 | 0.00 | 0.00 |
| ATOM | 756 | CG   | ARG | 46 | 28.705 | 43.677 | 25.825 | 0.00 | 0.00 |
| ATOM | 757 | HG2  | ARG | 46 | 29.421 | 44.291 | 25.308 | 0.00 | 0.00 |
| ATOM | 758 | HG3  | ARG | 46 | 27.995 | 43.326 | 25.098 | 0.00 | 0.00 |
| ATOM | 759 | CD   | ARG | 46 | 27.969 | 44.559 | 26.825 | 0.00 | 0.00 |
| ATOM | 760 | HD2  | ARG | 46 | 28.695 | 45.025 | 27.472 | 0.00 | 0.00 |
| ATOM | 761 | HD3  | ARG | 46 | 27.485 | 45.350 | 26.276 | 0.00 | 0.00 |
| ATOM | 762 | NE   | ARG | 46 | 26.942 | 43.841 | 27.585 | 0.00 | 0.00 |
| ATOM | 763 | HE   | ARG | 46 | 26.175 | 43.471 | 27.070 | 0.00 | 0.00 |
| ATOM | 764 | CZ   | ARG | 46 | 26.914 | 43.639 | 28.881 | 0.00 | 0.00 |
| ATOM | 765 | NH1  | ARG | 46 | 27.803 | 44.093 | 29.690 | 0.00 | 0.00 |
| ATOM | 766 | 1HH1 | ARG | 46 | 28.510 | 44.711 | 29.373 | 0.00 | 0.00 |
| ATOM | 767 | 2HH1 | ARG | 46 | 27.690 | 43.927 | 30.664 | 0.00 | 0.00 |
| ATOM | 768 | NH2  | ARG | 46 | 25.968 | 42.965 | 29.426 | 0.00 | 0.00 |
| ATOM | 769 | 1HH2 | ARG | 46 | 25.191 | 42.672 | 28.885 | 0.00 | 0.00 |
| ATOM | 770 | 2HH2 | ARG | 46 | 25.966 | 42.860 | 30.410 | 0.00 | 0.00 |
| ATOM | 771 | C    | ARG | 46 | 30.833 | 41.525 | 28.264 | 0.00 | 0.00 |
| ATOM | 772 | O    | ARG | 46 | 30.471 | 41.486 | 29.427 | 0.00 | 0.00 |
| ATOM | 773 | N    | HIP | 47 | 31.568 | 40.558 | 27.720 | 0.00 | 0.00 |
| ATOM | 774 | H    | HIP | 47 | 31.826 | 40.648 | 26.764 | 0.00 | 0.00 |
| ATOM | 775 | CA   | HIP | 47 | 31.977 | 39.363 | 28.460 | 0.00 | 0.00 |
| ATOM | 776 | HA   | HIP | 47 | 31.087 | 38.943 | 28.903 | 0.00 | 0.00 |
| ATOM | 777 | CB   | HIP | 47 | 32.550 | 38.324 | 27.493 | 0.00 | 0.00 |
| ATOM | 778 | HB2  | HIP | 47 | 31.844 | 38.158 | 26.701 | 0.00 | 0.00 |
| ATOM | 779 | HB3  | HIP | 47 | 33.445 | 38.712 | 27.045 | 0.00 | 0.00 |
| ATOM | 780 | CG   | HIP | 47 | 32.861 | 36.996 | 28.116 | 0.00 | 0.00 |
| ATOM | 781 | ND1  | HIP | 47 | 32.040 | 36.258 | 28.916 | 0.00 | 0.00 |
| ATOM | 782 | HD1  | HIP | 47 | 31.123 | 36.512 | 29.202 | 0.00 | 0.00 |
| ATOM | 783 | CE1  | HIP | 47 | 32.676 | 35.150 | 29.276 | 0.00 | 0.00 |
| ATOM | 784 | HE1  | HIP | 47 | 32.292 | 34.385 | 29.901 | 0.00 | 0.00 |
| ATOM | 785 | NE2  | HIP | 47 | 33.883 | 35.165 | 28.728 | 0.00 | 0.00 |
| ATOM | 786 | HE2  | HIP | 47 | 34.574 | 34.472 | 28.848 | 0.00 | 0.00 |
| ATOM | 787 | CD2  | HIP | 47 | 34.013 | 36.312 | 28.002 | 0.00 | 0.00 |
| ATOM | 788 | HD2  | HIP | 47 | 34.867 | 36.620 | 27.459 | 0.00 | 0.00 |
| ATOM | 789 | C    | HIP | 47 | 32.922 | 39.680 | 29.620 | 0.00 | 0.00 |
| ATOM | 790 | O    | HIP | 47 | 32.833 | 39.054 | 30.651 | 0.00 | 0.00 |
| ATOM | 791 | N    | GLN | 48 | 33.773 | 40.685 | 29.503 | 0.00 | 0.00 |
| ATOM | 792 | H    | GLN | 48 | 33.839 | 41.133 | 28.626 | 0.00 | 0.00 |
| ATOM | 793 | CA   | GLN | 48 | 34.619 | 41.154 | 30.597 | 0.00 | 0.00 |
| ATOM | 794 | HA   | GLN | 48 | 35.052 | 40.286 | 31.051 | 0.00 | 0.00 |
| ATOM | 795 | CB   | GLN | 48 | 35.743 | 42.007 | 30.042 | 0.00 | 0.00 |
| ATOM | 796 | HB2  | GLN | 48 | 36.164 | 41.525 | 29.205 | 0.00 | 0.00 |
| ATOM | 797 | HB3  | GLN | 48 | 35.351 | 42.922 | 29.710 | 0.00 | 0.00 |
| ATOM | 798 | CG   | GLN | 48 | 36.845 | 42.310 | 31.021 | 0.00 | 0.00 |
| ATOM | 799 | HG2  | GLN | 48 | 37.526 | 42.938 | 30.600 | 0.00 | 0.00 |
| ATOM | 800 | HG3  | GLN | 48 | 36.487 | 42.786 | 31.833 | 0.00 | 0.00 |

|      |     |      |     |    |        |        |        |      |      |
|------|-----|------|-----|----|--------|--------|--------|------|------|
| ATOM | 801 | CD   | GLN | 48 | 37.540 | 41.179 | 31.464 | 0.00 | 0.00 |
| ATOM | 802 | OE1  | GLN | 48 | 37.686 | 40.227 | 31.039 | 0.00 | 0.00 |
| ATOM | 803 | NE2  | GLN | 48 | 37.991 | 41.223 | 32.324 | 0.00 | 0.00 |
| ATOM | 804 | 1HE2 | GLN | 48 | 38.424 | 40.486 | 32.616 | 0.00 | 0.00 |
| ATOM | 805 | 2HE2 | GLN | 48 | 37.890 | 41.988 | 32.688 | 0.00 | 0.00 |
| ATOM | 806 | C    | GLN | 48 | 33.827 | 41.865 | 31.696 | 0.00 | 0.00 |
| ATOM | 807 | O    | GLN | 48 | 34.087 | 41.635 | 32.858 | 0.00 | 0.00 |
| ATOM | 808 | N    | GLN | 49 | 32.826 | 42.667 | 31.357 | 0.00 | 0.00 |
| ATOM | 809 | H    | GLN | 49 | 32.677 | 42.843 | 30.392 | 0.00 | 0.00 |
| ATOM | 810 | CA   | GLN | 49 | 31.942 | 43.329 | 32.318 | 0.00 | 0.00 |
| ATOM | 811 | HA   | GLN | 49 | 32.542 | 43.893 | 33.020 | 0.00 | 0.00 |
| ATOM | 812 | CB   | GLN | 49 | 31.014 | 44.290 | 31.574 | 0.00 | 0.00 |
| ATOM | 813 | HB2  | GLN | 49 | 30.641 | 43.820 | 30.740 | 0.00 | 0.00 |
| ATOM | 814 | HB3  | GLN | 49 | 30.212 | 44.531 | 32.168 | 0.00 | 0.00 |
| ATOM | 815 | CG   | GLN | 49 | 31.629 | 45.561 | 31.162 | 0.00 | 0.00 |
| ATOM | 816 | HG2  | GLN | 49 | 31.759 | 46.140 | 32.000 | 0.00 | 0.00 |
| ATOM | 817 | HG3  | GLN | 49 | 32.568 | 45.374 | 30.772 | 0.00 | 0.00 |
| ATOM | 818 | CD   | GLN | 49 | 30.828 | 46.332 | 30.150 | 0.00 | 0.00 |
| ATOM | 819 | OE1  | GLN | 49 | 29.991 | 45.901 | 29.479 | 0.00 | 0.00 |
| ATOM | 820 | NE2  | GLN | 49 | 31.049 | 47.493 | 29.983 | 0.00 | 0.00 |
| ATOM | 821 | 1HE2 | GLN | 49 | 30.501 | 47.986 | 29.335 | 0.00 | 0.00 |
| ATOM | 822 | 2HE2 | GLN | 49 | 31.714 | 47.860 | 30.533 | 0.00 | 0.00 |
| ATOM | 823 | C    | GLN | 49 | 31.108 | 42.340 | 33.134 | 0.00 | 0.00 |
| ATOM | 824 | O    | GLN | 49 | 30.963 | 42.511 | 34.331 | 0.00 | 0.00 |
| ATOM | 825 | N    | GLU | 50 | 30.600 | 41.276 | 32.523 | 0.00 | 0.00 |
| ATOM | 826 | H    | GLU | 50 | 30.680 | 41.220 | 31.534 | 0.00 | 0.00 |
| ATOM | 827 | CA   | GLU | 50 | 29.835 | 40.235 | 33.219 | 0.00 | 0.00 |
| ATOM | 828 | HA   | GLU | 50 | 29.130 | 40.714 | 33.882 | 0.00 | 0.00 |
| ATOM | 829 | CB   | GLU | 50 | 29.042 | 39.401 | 32.213 | 0.00 | 0.00 |
| ATOM | 830 | HB2  | GLU | 50 | 29.709 | 39.043 | 31.458 | 0.00 | 0.00 |
| ATOM | 831 | HB3  | GLU | 50 | 28.621 | 38.560 | 32.724 | 0.00 | 0.00 |
| ATOM | 832 | CG   | GLU | 50 | 27.913 | 40.172 | 31.559 | 0.00 | 0.00 |
| ATOM | 833 | HG2  | GLU | 50 | 27.342 | 40.645 | 32.323 | 0.00 | 0.00 |
| ATOM | 834 | HG3  | GLU | 50 | 28.312 | 40.936 | 30.934 | 0.00 | 0.00 |
| ATOM | 835 | CD   | GLU | 50 | 26.995 | 39.289 | 30.746 | 0.00 | 0.00 |
| ATOM | 836 | OE1  | GLU | 50 | 27.418 | 38.679 | 29.773 | 0.00 | 0.00 |
| ATOM | 837 | OE2  | GLU | 50 | 25.834 | 39.175 | 31.076 | 0.00 | 0.00 |
| ATOM | 838 | C    | GLU | 50 | 30.711 | 39.344 | 34.108 | 0.00 | 0.00 |
| ATOM | 839 | O    | GLU | 50 | 30.234 | 38.810 | 35.072 | 0.00 | 0.00 |
| ATOM | 840 | N    | GLN | 51 | 31.992 | 39.213 | 33.831 | 0.00 | 0.00 |
| ATOM | 841 | H    | GLN | 51 | 32.311 | 39.643 | 33.008 | 0.00 | 0.00 |
| ATOM | 842 | CA   | GLN | 51 | 32.964 | 38.545 | 34.696 | 0.00 | 0.00 |
| ATOM | 843 | HA   | GLN | 51 | 32.504 | 37.683 | 35.146 | 0.00 | 0.00 |
| ATOM | 844 | CB   | GLN | 51 | 34.148 | 38.076 | 33.870 | 0.00 | 0.00 |
| ATOM | 845 | HB2  | GLN | 51 | 34.498 | 38.877 | 33.261 | 0.00 | 0.00 |
| ATOM | 846 | HB3  | GLN | 51 | 34.941 | 37.796 | 34.529 | 0.00 | 0.00 |
| ATOM | 847 | CG   | GLN | 51 | 33.824 | 36.894 | 32.988 | 0.00 | 0.00 |
| ATOM | 848 | HG2  | GLN | 51 | 33.362 | 36.362 | 33.330 | 0.00 | 0.00 |
| ATOM | 849 | HG3  | GLN | 51 | 33.424 | 37.044 | 32.306 | 0.00 | 0.00 |
| ATOM | 850 | CD   | GLN | 51 | 34.662 | 36.218 | 32.553 | 0.00 | 0.00 |
| ATOM | 851 | OE1  | GLN | 51 | 34.916 | 35.468 | 32.901 | 0.00 | 0.00 |
| ATOM | 852 | NE2  | GLN | 51 | 35.129 | 36.466 | 31.788 | 0.00 | 0.00 |
| ATOM | 853 | 1HE2 | GLN | 51 | 35.695 | 36.048 | 31.515 | 0.00 | 0.00 |
| ATOM | 854 | 2HE2 | GLN | 51 | 34.927 | 37.081 | 31.494 | 0.00 | 0.00 |
| ATOM | 855 | C    | GLN | 51 | 33.432 | 39.427 | 35.848 | 0.00 | 0.00 |
| ATOM | 856 | O    | GLN | 51 | 33.585 | 38.954 | 36.951 | 0.00 | 0.00 |
| ATOM | 857 | N    | GLU | 52 | 33.581 | 40.721 | 35.634 | 0.00 | 0.00 |
| ATOM | 858 | H    | GLU | 52 | 33.489 | 41.043 | 34.706 | 0.00 | 0.00 |
| ATOM | 859 | CA   | GLU | 52 | 33.928 | 41.679 | 36.671 | 0.00 | 0.00 |
| ATOM | 860 | HA   | GLU | 52 | 34.803 | 41.328 | 37.175 | 0.00 | 0.00 |
| ATOM | 861 | CB   | GLU | 52 | 34.249 | 43.016 | 36.034 | 0.00 | 0.00 |
| ATOM | 862 | HB2  | GLU | 52 | 34.862 | 42.882 | 35.250 | 0.00 | 0.00 |
| ATOM | 863 | HB3  | GLU | 52 | 33.426 | 43.451 | 35.676 | 0.00 | 0.00 |
| ATOM | 864 | CG   | GLU | 52 | 34.894 | 43.953 | 36.891 | 0.00 | 0.00 |
| ATOM | 865 | HG2  | GLU | 52 | 34.325 | 44.207 | 37.558 | 0.00 | 0.00 |
| ATOM | 866 | HG3  | GLU | 52 | 35.582 | 43.532 | 37.294 | 0.00 | 0.00 |
| ATOM | 867 | CD   | GLU | 52 | 35.375 | 45.112 | 36.292 | 0.00 | 0.00 |
| ATOM | 868 | OE1  | GLU | 52 | 35.130 | 45.782 | 36.230 | 0.00 | 0.00 |
| ATOM | 869 | OE2  | GLU | 52 | 36.014 | 45.366 | 35.891 | 0.00 | 0.00 |
| ATOM | 870 | C    | GLU | 52 | 32.839 | 41.815 | 37.716 | 0.00 | 0.00 |
| ATOM | 871 | O    | GLU | 52 | 33.124 | 41.981 | 38.874 | 0.00 | 0.00 |
| ATOM | 872 | N    | ALA | 53 | 31.597 | 41.661 | 37.334 | 0.00 | 0.00 |
| ATOM | 873 | H    | ALA | 53 | 31.428 | 41.546 | 36.374 | 0.00 | 0.00 |
| ATOM | 874 | CA   | ALA | 53 | 30.476 | 41.614 | 38.233 | 0.00 | 0.00 |
| ATOM | 875 | HA   | ALA | 53 | 30.537 | 42.451 | 38.882 | 0.00 | 0.00 |
| ATOM | 876 | CB   | ALA | 53 | 29.228 | 41.747 | 37.430 | 0.00 | 0.00 |
| ATOM | 877 | HB1  | ALA | 53 | 28.938 | 41.835 | 37.217 | 0.00 | 0.00 |
| ATOM | 878 | HB2  | ALA | 53 | 28.927 | 41.734 | 37.213 | 0.00 | 0.00 |
| ATOM | 879 | HB3  | ALA | 53 | 28.904 | 41.769 | 37.298 | 0.00 | 0.00 |
| ATOM | 880 | C    | ALA | 53 | 30.439 | 40.378 | 39.110 | 0.00 | 0.00 |
| ATOM | 881 | O    | ALA | 53 | 29.839 | 40.388 | 40.138 | 0.00 | 0.00 |
| ATOM | 882 | N    | GLU | 54 | 31.105 | 39.333 | 38.737 | 0.00 | 0.00 |
| ATOM | 883 | H    | GLU | 54 | 31.537 | 39.379 | 37.865 | 0.00 | 0.00 |
| ATOM | 884 | CA   | GLU | 54 | 31.275 | 38.129 | 39.518 | 0.00 | 0.00 |
| ATOM | 885 | HA   | GLU | 54 | 30.558 | 38.115 | 40.287 | 0.00 | 0.00 |
| ATOM | 886 | CB   | GLU | 54 | 31.039 | 36.934 | 38.658 | 0.00 | 0.00 |
| ATOM | 887 | HB2  | GLU | 54 | 31.170 | 37.015 | 37.829 | 0.00 | 0.00 |
| ATOM | 888 | HB3  | GLU | 54 | 31.533 | 36.344 | 38.866 | 0.00 | 0.00 |
| ATOM | 889 | CG   | GLU | 54 | 29.973 | 36.391 | 38.614 | 0.00 | 0.00 |
| ATOM | 890 | HG2  | GLU | 54 | 29.833 | 36.504 | 38.784 | 0.00 | 0.00 |
| ATOM | 891 | HG3  | GLU | 54 | 29.866 | 36.452 | 38.408 | 0.00 | 0.00 |
| ATOM | 892 | CD   | GLU | 54 | 29.246 | 35.615 | 38.592 | 0.00 | 0.00 |
| ATOM | 893 | OE1  | GLU | 54 | 28.928 | 35.288 | 38.365 | 0.00 | 0.00 |
| ATOM | 894 | OE2  | GLU | 54 | 28.967 | 35.322 | 38.803 | 0.00 | 0.00 |
| ATOM | 895 | C    | GLU | 54 | 32.608 | 38.047 | 40.199 | 0.00 | 0.00 |
| ATOM | 896 | O    | GLU | 54 | 32.827 | 37.181 | 40.958 | 0.00 | 0.00 |
| ATOM | 897 | N    | GLY | 55 | 33.498 | 38.942 | 39.945 | 0.00 | 0.00 |
| ATOM | 898 | H    | GLY | 55 | 33.251 | 39.612 | 39.311 | 0.00 | 0.00 |
| ATOM | 899 | CA   | GLY | 55 | 34.816 | 38.977 | 40.484 | 0.00 | 0.00 |
| ATOM | 900 | HA2  | GLY | 55 | 35.201 | 39.931 | 40.346 | 0.00 | 0.00 |
| ATOM | 901 | HA3  | GLY | 55 | 34.797 | 38.801 | 41.512 | 0.00 | 0.00 |
| ATOM | 902 | C    | GLY | 55 | 35.750 | 38.019 | 39.865 | 0.00 | 0.00 |
| ATOM | 903 | O    | GLY | 55 | 36.709 | 37.715 | 40.420 | 0.00 | 0.00 |
| ATOM | 904 | N    | VAL | 56 | 35.468 | 37.515 | 38.733 | 0.00 | 0.00 |
| ATOM | 905 | H    | VAL | 56 | 34.690 | 37.850 | 38.319 | 0.00 | 0.00 |

|      |      |      |     |    |        |        |        |      |      |
|------|------|------|-----|----|--------|--------|--------|------|------|
| ATOM | 906  | CA   | VAL | 56 | 36.222 | 36.542 | 38.021 | 0.00 | 0.00 |
| ATOM | 907  | HA   | VAL | 56 | 36.863 | 36.088 | 38.644 | 0.00 | 0.00 |
| ATOM | 908  | CB   | VAL | 56 | 35.382 | 35.543 | 37.478 | 0.00 | 0.00 |
| ATOM | 909  | HB   | VAL | 56 | 34.734 | 35.986 | 36.870 | 0.00 | 0.00 |
| ATOM | 910  | CG1  | VAL | 56 | 36.103 | 34.507 | 36.737 | 0.00 | 0.00 |
| ATOM | 911  | 1HG1 | VAL | 56 | 36.716 | 34.446 | 36.648 | 0.00 | 0.00 |
| ATOM | 912  | 2HG1 | VAL | 56 | 36.115 | 33.863 | 36.813 | 0.00 | 0.00 |
| ATOM | 913  | 3HG1 | VAL | 56 | 35.983 | 34.454 | 36.186 | 0.00 | 0.00 |
| ATOM | 914  | CG2  | VAL | 56 | 34.629 | 34.926 | 38.486 | 0.00 | 0.00 |
| ATOM | 915  | 1HG2 | VAL | 56 | 34.556 | 34.595 | 38.767 | 0.00 | 0.00 |
| ATOM | 916  | 2HG2 | VAL | 56 | 34.458 | 34.904 | 38.873 | 0.00 | 0.00 |
| ATOM | 917  | 3HG2 | VAL | 56 | 34.313 | 34.827 | 38.546 | 0.00 | 0.00 |
| ATOM | 918  | C    | VAL | 56 | 37.012 | 37.117 | 37.010 | 0.00 | 0.00 |
| ATOM | 919  | O    | VAL | 56 | 36.560 | 37.884 | 36.373 | 0.00 | 0.00 |
| ATOM | 920  | N    | ALA | 57 | 38.188 | 36.741 | 36.847 | 0.00 | 0.00 |
| ATOM | 921  | H    | ALA | 57 | 38.501 | 36.103 | 37.388 | 0.00 | 0.00 |
| ATOM | 922  | CA   | ALA | 57 | 39.055 | 37.156 | 35.893 | 0.00 | 0.00 |
| ATOM | 923  | HA   | ALA | 57 | 38.732 | 37.916 | 35.657 | 0.00 | 0.00 |
| ATOM | 924  | CB   | ALA | 57 | 40.214 | 37.351 | 36.356 | 0.00 | 0.00 |
| ATOM | 925  | HB1  | ALA | 57 | 40.585 | 37.485 | 36.575 | 0.00 | 0.00 |
| ATOM | 926  | HB2  | ALA | 57 | 40.487 | 37.287 | 36.434 | 0.00 | 0.00 |
| ATOM | 927  | HB3  | ALA | 57 | 40.419 | 37.431 | 36.388 | 0.00 | 0.00 |
| ATOM | 928  | C    | ALA | 57 | 39.254 | 36.416 | 34.775 | 0.00 | 0.00 |
| ATOM | 929  | O    | ALA | 57 | 39.132 | 35.460 | 34.837 | 0.00 | 0.00 |
| ATOM | 930  | N    | ALA | 58 | 39.574 | 36.869 | 33.742 | 0.00 | 0.00 |
| ATOM | 931  | H    | ALA | 58 | 39.655 | 37.649 | 33.755 | 0.00 | 0.00 |
| ATOM | 932  | CA   | ALA | 58 | 39.816 | 36.301 | 32.594 | 0.00 | 0.00 |
| ATOM | 933  | HA   | ALA | 58 | 39.204 | 35.736 | 32.647 | 0.00 | 0.00 |
| ATOM | 934  | CB   | ALA | 58 | 39.651 | 37.010 | 31.664 | 0.00 | 0.00 |
| ATOM | 935  | HB1  | ALA | 58 | 39.533 | 37.190 | 31.362 | 0.00 | 0.00 |
| ATOM | 936  | HB2  | ALA | 58 | 39.647 | 37.216 | 31.377 | 0.00 | 0.00 |
| ATOM | 937  | HB3  | ALA | 58 | 39.643 | 37.128 | 31.571 | 0.00 | 0.00 |
| ATOM | 938  | C    | ALA | 58 | 40.987 | 35.787 | 32.245 | 0.00 | 0.00 |
| ATOM | 939  | O    | ALA | 58 | 41.738 | 36.209 | 32.532 | 0.00 | 0.00 |
| ATOM | 940  | N    | PRO | 59 | 41.180 | 34.900 | 31.616 | 0.00 | 0.00 |
| ATOM | 941  | CD   | PRO | 59 | 40.366 | 34.286 | 31.295 | 0.00 | 0.00 |
| ATOM | 942  | HD2  | PRO | 59 | 39.948 | 34.650 | 30.756 | 0.00 | 0.00 |
| ATOM | 943  | HD3  | PRO | 59 | 39.784 | 34.079 | 32.056 | 0.00 | 0.00 |
| ATOM | 944  | CG   | PRO | 59 | 40.988 | 33.371 | 30.638 | 0.00 | 0.00 |
| ATOM | 945  | HG2  | PRO | 59 | 41.056 | 33.383 | 29.814 | 0.00 | 0.00 |
| ATOM | 946  | HG3  | PRO | 59 | 40.629 | 32.802 | 30.926 | 0.00 | 0.00 |
| ATOM | 947  | CB   | PRO | 59 | 42.068 | 33.333 | 30.797 | 0.00 | 0.00 |
| ATOM | 948  | HB2  | PRO | 59 | 42.102 | 32.869 | 31.424 | 0.00 | 0.00 |
| ATOM | 949  | HB3  | PRO | 59 | 42.587 | 33.064 | 30.029 | 0.00 | 0.00 |
| ATOM | 950  | CA   | PRO | 59 | 42.275 | 34.386 | 31.213 | 0.00 | 0.00 |
| ATOM | 951  | HA   | PRO | 59 | 42.649 | 34.337 | 31.956 | 0.00 | 0.00 |
| ATOM | 952  | C    | PRO | 59 | 43.055 | 34.927 | 30.231 | 0.00 | 0.00 |
| ATOM | 953  | O    | PRO | 59 | 42.718 | 35.424 | 29.556 | 0.00 | 0.00 |
| ATOM | 954  | N    | ALA | 60 | 44.106 | 34.819 | 30.135 | 0.00 | 0.00 |
| ATOM | 955  | H    | ALA | 60 | 44.326 | 34.407 | 30.725 | 0.00 | 0.00 |
| ATOM | 956  | CA   | ALA | 60 | 44.979 | 35.218 | 29.225 | 0.00 | 0.00 |
| ATOM | 957  | HA   | ALA | 60 | 44.570 | 35.853 | 28.717 | 0.00 | 0.00 |
| ATOM | 958  | CB   | ALA | 60 | 45.897 | 35.789 | 29.914 | 0.00 | 0.00 |
| ATOM | 959  | HB1  | ALA | 60 | 46.068 | 35.834 | 30.090 | 0.00 | 0.00 |
| ATOM | 960  | HB2  | ALA | 60 | 46.169 | 35.947 | 29.981 | 0.00 | 0.00 |
| ATOM | 961  | HB3  | ALA | 60 | 46.127 | 36.008 | 30.164 | 0.00 | 0.00 |
| ATOM | 962  | C    | ALA | 60 | 45.506 | 34.245 | 28.275 | 0.00 | 0.00 |
| ATOM | 963  | O    | ALA | 60 | 45.626 | 33.229 | 28.577 | 0.00 | 0.00 |
| ATOM | 964  | N    | ASP | 61 | 45.850 | 34.554 | 27.129 | 0.00 | 0.00 |
| ATOM | 965  | H    | ASP | 61 | 45.740 | 35.402 | 26.945 | 0.00 | 0.00 |
| ATOM | 966  | CA   | ASP | 61 | 46.413 | 33.767 | 26.100 | 0.00 | 0.00 |
| ATOM | 967  | HA   | ASP | 61 | 46.740 | 32.912 | 26.530 | 0.00 | 0.00 |
| ATOM | 968  | CB   | ASP | 61 | 45.402 | 33.445 | 25.132 | 0.00 | 0.00 |
| ATOM | 969  | HB2  | ASP | 61 | 44.606 | 33.097 | 25.660 | 0.00 | 0.00 |
| ATOM | 970  | HB3  | ASP | 61 | 45.111 | 34.268 | 24.636 | 0.00 | 0.00 |
| ATOM | 971  | CG   | ASP | 61 | 45.827 | 32.489 | 24.131 | 0.00 | 0.00 |
| ATOM | 972  | OD1  | ASP | 61 | 45.840 | 32.012 | 23.911 | 0.00 | 0.00 |
| ATOM | 973  | OD2  | ASP | 61 | 46.138 | 32.216 | 23.545 | 0.00 | 0.00 |
| ATOM | 974  | C    | ASP | 61 | 47.533 | 34.422 | 25.416 | 0.00 | 0.00 |
| ATOM | 975  | O    | ASP | 61 | 47.456 | 35.549 | 25.207 | 0.00 | 0.00 |
| ATOM | 976  | N    | PRO | 62 | 48.560 | 33.766 | 25.037 | 0.00 | 0.00 |
| ATOM | 977  | CD   | PRO | 62 | 48.855 | 32.487 | 25.350 | 0.00 | 0.00 |
| ATOM | 978  | HD2  | PRO | 62 | 48.292 | 31.864 | 24.862 | 0.00 | 0.00 |
| ATOM | 979  | HD3  | PRO | 62 | 48.769 | 32.305 | 26.350 | 0.00 | 0.00 |
| ATOM | 980  | CG   | PRO | 62 | 50.165 | 32.303 | 24.949 | 0.00 | 0.00 |
| ATOM | 981  | HG2  | PRO | 62 | 50.249 | 31.671 | 24.405 | 0.00 | 0.00 |
| ATOM | 982  | HG3  | PRO | 62 | 50.615 | 32.170 | 25.643 | 0.00 | 0.00 |
| ATOM | 983  | CB   | PRO | 62 | 50.634 | 33.315 | 24.321 | 0.00 | 0.00 |
| ATOM | 984  | HB2  | PRO | 62 | 51.378 | 33.544 | 24.716 | 0.00 | 0.00 |
| ATOM | 985  | HB3  | PRO | 62 | 50.840 | 33.068 | 23.462 | 0.00 | 0.00 |
| ATOM | 986  | CA   | PRO | 62 | 49.645 | 34.333 | 24.392 | 0.00 | 0.00 |
| ATOM | 987  | HA   | PRO | 62 | 49.984 | 35.066 | 24.997 | 0.00 | 0.00 |
| ATOM | 988  | C    | PRO | 62 | 49.413 | 34.891 | 23.051 | 0.00 | 0.00 |
| ATOM | 989  | O    | PRO | 62 | 50.093 | 35.707 | 22.647 | 0.00 | 0.00 |
| ATOM | 990  | N    | GLU | 63 | 48.465 | 34.479 | 22.360 | 0.00 | 0.00 |
| ATOM | 991  | H    | GLU | 63 | 47.938 | 33.816 | 22.750 | 0.00 | 0.00 |
| ATOM | 992  | CA   | GLU | 63 | 48.141 | 34.939 | 21.066 | 0.00 | 0.00 |
| ATOM | 993  | HA   | GLU | 63 | 48.801 | 35.644 | 20.767 | 0.00 | 0.00 |
| ATOM | 994  | CB   | GLU | 63 | 48.231 | 33.876 | 20.079 | 0.00 | 0.00 |
| ATOM | 995  | HB2  | GLU | 63 | 47.628 | 33.152 | 20.387 | 0.00 | 0.00 |
| ATOM | 996  | HB3  | GLU | 63 | 47.898 | 34.195 | 19.164 | 0.00 | 0.00 |
| ATOM | 997  | CG   | GLU | 63 | 49.527 | 33.330 | 19.874 | 0.00 | 0.00 |
| ATOM | 998  | HG2  | GLU | 63 | 49.876 | 33.190 | 20.585 | 0.00 | 0.00 |
| ATOM | 999  | HG3  | GLU | 63 | 49.520 | 32.621 | 19.489 | 0.00 | 0.00 |
| ATOM | 1000 | CD   | GLU | 63 | 50.362 | 33.877 | 19.221 | 0.00 | 0.00 |
| ATOM | 1001 | OE1  | GLU | 63 | 50.664 | 33.848 | 18.976 | 0.00 | 0.00 |
| ATOM | 1002 | OE2  | GLU | 63 | 50.735 | 34.325 | 18.933 | 0.00 | 0.00 |
| ATOM | 1003 | C    | GLU | 63 | 46.838 | 35.568 | 21.019 | 0.00 | 0.00 |
| ATOM | 1004 | O    | GLU | 63 | 46.680 | 36.445 | 20.292 | 0.00 | 0.00 |
| ATOM | 1005 | N    | MET | 64 | 45.929 | 35.143 | 21.800 | 0.00 | 0.00 |
| ATOM | 1006 | H    | MET | 64 | 46.158 | 34.414 | 22.349 | 0.00 | 0.00 |
| ATOM | 1007 | CA   | MET | 64 | 44.636 | 35.634 | 21.932 | 0.00 | 0.00 |
| ATOM | 1008 | HA   | MET | 64 | 44.135 | 34.943 | 22.491 | 0.00 | 0.00 |
| ATOM | 1009 | CB   | MET | 64 | 44.639 | 36.837 | 22.752 | 0.00 | 0.00 |
| ATOM | 1010 | HB2  | MET | 64 | 45.313 | 36.725 | 23.506 | 0.00 | 0.00 |

|      |      |      |     |    |        |        |        |      |      |
|------|------|------|-----|----|--------|--------|--------|------|------|
| ATOM | 1011 | HB3  | MET | 64 | 44.937 | 37.604 | 22.162 | 0.00 | 0.00 |
| ATOM | 1012 | CG   | MET | 64 | 43.384 | 37.193 | 23.376 | 0.00 | 0.00 |
| ATOM | 1013 | HG2  | MET | 64 | 43.426 | 38.039 | 23.789 | 0.00 | 0.00 |
| ATOM | 1014 | HG3  | MET | 64 | 42.741 | 37.266 | 22.709 | 0.00 | 0.00 |
| ATOM | 1015 | SD   | MET | 64 | 42.834 | 36.260 | 24.543 | 0.00 | 0.00 |
| ATOM | 1016 | CE   | MET | 64 | 42.441 | 36.774 | 25.413 | 0.00 | 0.00 |
| ATOM | 1017 | HE1  | MET | 64 | 42.276 | 36.946 | 25.569 | 0.00 | 0.00 |
| ATOM | 1018 | HE2  | MET | 64 | 42.353 | 36.813 | 25.654 | 0.00 | 0.00 |
| ATOM | 1019 | HE3  | MET | 64 | 42.443 | 36.877 | 25.543 | 0.00 | 0.00 |
| ATOM | 1020 | C    | MET | 64 | 43.916 | 35.741 | 20.643 | 0.00 | 0.00 |
| ATOM | 1021 | O    | MET | 64 | 43.280 | 36.631 | 20.408 | 0.00 | 0.00 |
| ATOM | 1022 | N    | VAL | 65 | 44.008 | 34.829 | 19.795 | 0.00 | 0.00 |
| ATOM | 1023 | H    | VAL | 65 | 44.532 | 34.123 | 20.050 | 0.00 | 0.00 |
| ATOM | 1024 | CA   | VAL | 65 | 43.436 | 34.834 | 18.485 | 0.00 | 0.00 |
| ATOM | 1025 | HA   | VAL | 65 | 43.322 | 35.818 | 18.215 | 0.00 | 0.00 |
| ATOM | 1026 | CB   | VAL | 65 | 44.339 | 34.218 | 17.490 | 0.00 | 0.00 |
| ATOM | 1027 | HB   | VAL | 65 | 43.880 | 34.267 | 16.562 | 0.00 | 0.00 |
| ATOM | 1028 | CG1  | VAL | 65 | 45.586 | 34.939 | 17.393 | 0.00 | 0.00 |
| ATOM | 1029 | 1HG1 | VAL | 65 | 45.881 | 35.097 | 17.119 | 0.00 | 0.00 |
| ATOM | 1030 | 2HG1 | VAL | 65 | 46.057 | 34.979 | 17.486 | 0.00 | 0.00 |
| ATOM | 1031 | 3HG1 | VAL | 65 | 45.727 | 35.258 | 17.484 | 0.00 | 0.00 |
| ATOM | 1032 | CG2  | VAL | 65 | 44.634 | 32.836 | 17.740 | 0.00 | 0.00 |
| ATOM | 1033 | 1HG2 | VAL | 65 | 44.913 | 32.555 | 17.982 | 0.00 | 0.00 |
| ATOM | 1034 | 2HG2 | VAL | 65 | 44.463 | 32.399 | 17.904 | 0.00 | 0.00 |
| ATOM | 1035 | 3HG2 | VAL | 65 | 44.741 | 32.541 | 17.498 | 0.00 | 0.00 |
| ATOM | 1036 | C    | VAL | 65 | 42.079 | 34.257 | 18.369 | 0.00 | 0.00 |
| ATOM | 1037 | O    | VAL | 65 | 41.495 | 34.327 | 17.344 | 0.00 | 0.00 |
| ATOM | 1038 | N    | THR | 66 | 41.548 | 33.711 | 19.394 | 0.00 | 0.00 |
| ATOM | 1039 | H    | THR | 66 | 42.064 | 33.689 | 20.205 | 0.00 | 0.00 |
| ATOM | 1040 | CA   | THR | 66 | 40.220 | 33.189 | 19.418 | 0.00 | 0.00 |
| ATOM | 1041 | HA   | THR | 66 | 40.094 | 32.613 | 18.573 | 0.00 | 0.00 |
| ATOM | 1042 | CB   | THR | 66 | 40.014 | 32.330 | 20.576 | 0.00 | 0.00 |
| ATOM | 1043 | HB   | THR | 66 | 39.002 | 32.114 | 20.656 | 0.00 | 0.00 |
| ATOM | 1044 | CG2  | THR | 66 | 40.766 | 31.084 | 20.483 | 0.00 | 0.00 |
| ATOM | 1045 | 1HG2 | THR | 66 | 40.831 | 30.738 | 20.500 | 0.00 | 0.00 |
| ATOM | 1046 | 2HG2 | THR | 66 | 40.972 | 30.786 | 20.342 | 0.00 | 0.00 |
| ATOM | 1047 | 3HG2 | THR | 66 | 41.035 | 30.812 | 20.541 | 0.00 | 0.00 |
| ATOM | 1048 | OG1  | THR | 66 | 40.398 | 32.934 | 21.688 | 0.00 | 0.00 |
| ATOM | 1049 | HG1  | THR | 66 | 40.600 | 32.572 | 22.210 | 0.00 | 0.00 |
| ATOM | 1050 | C    | THR | 66 | 39.149 | 34.218 | 19.393 | 0.00 | 0.00 |
| ATOM | 1051 | O    | THR | 66 | 38.131 | 34.007 | 18.812 | 0.00 | 0.00 |
| ATOM | 1052 | N    | LEU | 67 | 39.395 | 35.351 | 19.946 | 0.00 | 0.00 |
| ATOM | 1053 | H    | LEU | 67 | 40.242 | 35.433 | 20.417 | 0.00 | 0.00 |
| ATOM | 1054 | CA   | LEU | 67 | 38.629 | 36.540 | 19.800 | 0.00 | 0.00 |
| ATOM | 1055 | HA   | LEU | 67 | 38.102 | 36.492 | 18.894 | 0.00 | 0.00 |
| ATOM | 1056 | CB   | LEU | 67 | 37.603 | 36.618 | 20.904 | 0.00 | 0.00 |
| ATOM | 1057 | HB2  | LEU | 67 | 37.004 | 35.747 | 20.870 | 0.00 | 0.00 |
| ATOM | 1058 | HB3  | LEU | 67 | 38.114 | 36.623 | 21.814 | 0.00 | 0.00 |
| ATOM | 1059 | CG   | LEU | 67 | 36.679 | 37.791 | 20.873 | 0.00 | 0.00 |
| ATOM | 1060 | HG   | LEU | 67 | 37.233 | 38.665 | 20.957 | 0.00 | 0.00 |
| ATOM | 1061 | CD1  | LEU | 67 | 35.883 | 37.861 | 19.658 | 0.00 | 0.00 |
| ATOM | 1062 | 1HD1 | LEU | 67 | 35.761 | 37.929 | 19.329 | 0.00 | 0.00 |
| ATOM | 1063 | 2HD1 | LEU | 67 | 35.662 | 37.803 | 19.344 | 0.00 | 0.00 |
| ATOM | 1064 | 3HD1 | LEU | 67 | 35.655 | 37.928 | 19.419 | 0.00 | 0.00 |
| ATOM | 1065 | CD2  | LEU | 67 | 35.735 | 37.739 | 22.001 | 0.00 | 0.00 |
| ATOM | 1066 | 1HD2 | LEU | 67 | 35.368 | 37.181 | 22.122 | 0.00 | 0.00 |
| ATOM | 1067 | 2HD2 | LEU | 67 | 35.964 | 37.823 | 22.630 | 0.00 | 0.00 |
| ATOM | 1068 | 3HD2 | LEU | 67 | 35.185 | 38.187 | 22.083 | 0.00 | 0.00 |
| ATOM | 1069 | C    | LEU | 67 | 39.591 | 37.718 | 19.767 | 0.00 | 0.00 |
| ATOM | 1070 | O    | LEU | 67 | 39.976 | 38.198 | 20.779 | 0.00 | 0.00 |
| ATOM | 1071 | N    | PRO | 68 | 40.034 | 38.165 | 18.635 | 0.00 | 0.00 |
| ATOM | 1072 | CD   | PRO | 68 | 39.748 | 37.618 | 17.375 | 0.00 | 0.00 |
| ATOM | 1073 | HD2  | PRO | 68 | 38.799 | 37.875 | 17.069 | 0.00 | 0.00 |
| ATOM | 1074 | HD3  | PRO | 68 | 39.822 | 36.582 | 17.376 | 0.00 | 0.00 |
| ATOM | 1075 | CG   | PRO | 68 | 40.737 | 38.190 | 16.455 | 0.00 | 0.00 |
| ATOM | 1076 | HG2  | PRO | 68 | 40.314 | 38.587 | 15.734 | 0.00 | 0.00 |
| ATOM | 1077 | HG3  | PRO | 68 | 41.353 | 37.547 | 16.152 | 0.00 | 0.00 |
| ATOM | 1078 | CB   | PRO | 68 | 41.436 | 39.157 | 17.143 | 0.00 | 0.00 |
| ATOM | 1079 | HB2  | PRO | 68 | 42.299 | 38.962 | 17.022 | 0.00 | 0.00 |
| ATOM | 1080 | HB3  | PRO | 68 | 41.257 | 39.960 | 16.807 | 0.00 | 0.00 |
| ATOM | 1081 | CA   | PRO | 68 | 41.063 | 39.158 | 18.526 | 0.00 | 0.00 |
| ATOM | 1082 | HA   | PRO | 68 | 41.865 | 38.846 | 19.068 | 0.00 | 0.00 |
| ATOM | 1083 | C    | PRO | 68 | 40.721 | 40.513 | 18.995 | 0.00 | 0.00 |
| ATOM | 1084 | O    | PRO | 68 | 39.724 | 41.027 | 18.660 | 0.00 | 0.00 |
| ATOM | 1085 | N    | LEU | 69 | 41.574 | 41.093 | 19.753 | 0.00 | 0.00 |
| ATOM | 1086 | H    | LEU | 69 | 42.359 | 40.605 | 19.972 | 0.00 | 0.00 |
| ATOM | 1087 | CA   | LEU | 69 | 41.456 | 42.358 | 20.318 | 0.00 | 0.00 |
| ATOM | 1088 | HA   | LEU | 69 | 40.858 | 42.922 | 19.723 | 0.00 | 0.00 |
| ATOM | 1089 | CB   | LEU | 69 | 40.796 | 42.206 | 21.583 | 0.00 | 0.00 |
| ATOM | 1090 | HB2  | LEU | 69 | 39.973 | 41.626 | 21.420 | 0.00 | 0.00 |
| ATOM | 1091 | HB3  | LEU | 69 | 41.402 | 41.710 | 22.195 | 0.00 | 0.00 |
| ATOM | 1092 | CG   | LEU | 69 | 40.375 | 43.365 | 22.288 | 0.00 | 0.00 |
| ATOM | 1093 | HG   | LEU | 69 | 40.470 | 43.215 | 22.810 | 0.00 | 0.00 |
| ATOM | 1094 | CD1  | LEU | 69 | 40.692 | 44.178 | 22.268 | 0.00 | 0.00 |
| ATOM | 1095 | 1HD1 | LEU | 69 | 40.745 | 44.085 | 22.323 | 0.00 | 0.00 |
| ATOM | 1096 | 2HD1 | LEU | 69 | 40.780 | 44.412 | 22.282 | 0.00 | 0.00 |
| ATOM | 1097 | 3HD1 | LEU | 69 | 40.771 | 44.642 | 22.207 | 0.00 | 0.00 |
| ATOM | 1098 | CD2  | LEU | 69 | 39.433 | 43.905 | 22.406 | 0.00 | 0.00 |
| ATOM | 1099 | 1HD2 | LEU | 69 | 39.462 | 43.953 | 22.639 | 0.00 | 0.00 |
| ATOM | 1100 | 2HD2 | LEU | 69 | 39.229 | 44.324 | 22.297 | 0.00 | 0.00 |
| ATOM | 1101 | 3HD2 | LEU | 69 | 38.916 | 43.829 | 22.374 | 0.00 | 0.00 |
| ATOM | 1102 | C    | LEU | 69 | 42.794 | 43.016 | 20.427 | 0.00 | 0.00 |
| ATOM | 1103 | O    | LEU | 69 | 43.668 | 42.512 | 20.955 | 0.00 | 0.00 |
| ATOM | 1104 | N    | GLN | 70 | 42.953 | 44.143 | 19.951 | 0.00 | 0.00 |
| ATOM | 1105 | H    | GLN | 70 | 42.208 | 44.488 | 19.514 | 0.00 | 0.00 |
| ATOM | 1106 | CA   | GLN | 70 | 44.135 | 44.940 | 20.026 | 0.00 | 0.00 |
| ATOM | 1107 | HA   | GLN | 70 | 44.895 | 44.349 | 20.416 | 0.00 | 0.00 |
| ATOM | 1108 | CB   | GLN | 70 | 44.544 | 45.331 | 18.665 | 0.00 | 0.00 |
| ATOM | 1109 | HB2  | GLN | 70 | 44.281 | 45.032 | 18.124 | 0.00 | 0.00 |
| ATOM | 1110 | HB3  | GLN | 70 | 44.432 | 45.950 | 18.490 | 0.00 | 0.00 |
| ATOM | 1111 | CG   | GLN | 70 | 45.454 | 45.286 | 18.253 | 0.00 | 0.00 |
| ATOM | 1112 | HG2  | GLN | 70 | 45.718 | 45.581 | 18.771 | 0.00 | 0.00 |
| ATOM | 1113 | HG3  | GLN | 70 | 45.572 | 44.680 | 18.400 | 0.00 | 0.00 |
| ATOM | 1114 | CD   | GLN | 70 | 45.844 | 45.666 | 16.946 | 0.00 | 0.00 |
| ATOM | 1115 | OE1  | GLN | 70 | 45.619 | 45.990 | 16.401 | 0.00 | 0.00 |

|      |      |      |     |    |        |        |        |      |      |
|------|------|------|-----|----|--------|--------|--------|------|------|
| ATOM | 1116 | NE2  | GLN | 70 | 46.451 | 45.648 | 16.393 | 0.00 | 0.00 |
| ATOM | 1117 | 1HE2 | GLN | 70 | 46.649 | 45.383 | 16.816 | 0.00 | 0.00 |
| ATOM | 1118 | 2HE2 | GLN | 70 | 46.703 | 45.896 | 15.542 | 0.00 | 0.00 |
| ATOM | 1119 | C    | GLN | 70 | 43.952 | 46.138 | 20.899 | 0.00 | 0.00 |
| ATOM | 1120 | O    | GLN | 70 | 43.159 | 46.938 | 20.626 | 0.00 | 0.00 |
| ATOM | 1121 | N    | PRO | 71 | 44.676 | 46.315 | 21.927 | 0.00 | 0.00 |
| ATOM | 1122 | CD   | PRO | 71 | 45.552 | 45.406 | 22.410 | 0.00 | 0.00 |
| ATOM | 1123 | HD2  | PRO | 71 | 46.377 | 45.401 | 21.897 | 0.00 | 0.00 |
| ATOM | 1124 | HD3  | PRO | 71 | 45.200 | 44.449 | 22.408 | 0.00 | 0.00 |
| ATOM | 1125 | CG   | PRO | 71 | 45.800 | 45.866 | 23.702 | 0.00 | 0.00 |
| ATOM | 1126 | HG2  | PRO | 71 | 46.603 | 45.819 | 23.926 | 0.00 | 0.00 |
| ATOM | 1127 | HG3  | PRO | 71 | 45.347 | 45.405 | 24.207 | 0.00 | 0.00 |
| ATOM | 1128 | CB   | PRO | 71 | 45.475 | 47.112 | 23.880 | 0.00 | 0.00 |
| ATOM | 1129 | HB2  | PRO | 71 | 45.117 | 47.215 | 24.695 | 0.00 | 0.00 |
| ATOM | 1130 | HB3  | PRO | 71 | 46.252 | 47.630 | 23.861 | 0.00 | 0.00 |
| ATOM | 1131 | CA   | PRO | 71 | 44.528 | 47.383 | 22.833 | 0.00 | 0.00 |
| ATOM | 1132 | HA   | PRO | 71 | 43.586 | 47.325 | 23.217 | 0.00 | 0.00 |
| ATOM | 1133 | C    | PRO | 71 | 44.712 | 48.751 | 22.314 | 0.00 | 0.00 |
| ATOM | 1134 | O    | PRO | 71 | 44.247 | 49.658 | 22.834 | 0.00 | 0.00 |
| ATOM | 1135 | N    | SER | 72 | 45.359 | 48.917 | 21.278 | 0.00 | 0.00 |
| ATOM | 1136 | H    | SER | 72 | 45.751 | 48.148 | 20.926 | 0.00 | 0.00 |
| ATOM | 1137 | CA   | SER | 72 | 45.585 | 50.151 | 20.625 | 0.00 | 0.00 |
| ATOM | 1138 | HA   | SER | 72 | 45.557 | 50.896 | 21.316 | 0.00 | 0.00 |
| ATOM | 1139 | CB   | SER | 72 | 46.908 | 50.123 | 20.082 | 0.00 | 0.00 |
| ATOM | 1140 | HB2  | SER | 72 | 47.078 | 50.796 | 19.575 | 0.00 | 0.00 |
| ATOM | 1141 | HB3  | SER | 72 | 47.543 | 50.127 | 20.667 | 0.00 | 0.00 |
| ATOM | 1142 | OG   | SER | 72 | 47.126 | 49.240 | 19.497 | 0.00 | 0.00 |
| ATOM | 1143 | HG   | SER | 72 | 47.615 | 49.091 | 19.387 | 0.00 | 0.00 |
| ATOM | 1144 | C    | SER | 72 | 44.599 | 50.551 | 19.591 | 0.00 | 0.00 |
| ATOM | 1145 | O    | SER | 72 | 44.714 | 51.552 | 19.020 | 0.00 | 0.00 |
| ATOM | 1146 | N    | SER | 73 | 43.622 | 49.801 | 19.334 | 0.00 | 0.00 |
| ATOM | 1147 | H    | SER | 73 | 43.553 | 49.012 | 19.850 | 0.00 | 0.00 |
| ATOM | 1148 | CA   | SER | 73 | 42.636 | 50.067 | 18.343 | 0.00 | 0.00 |
| ATOM | 1149 | HA   | SER | 73 | 43.130 | 50.380 | 17.478 | 0.00 | 0.00 |
| ATOM | 1150 | CB   | SER | 73 | 41.916 | 48.813 | 18.004 | 0.00 | 0.00 |
| ATOM | 1151 | HB2  | SER | 73 | 42.401 | 48.240 | 17.569 | 0.00 | 0.00 |
| ATOM | 1152 | HB3  | SER | 73 | 41.649 | 48.375 | 18.684 | 0.00 | 0.00 |
| ATOM | 1153 | OG   | SER | 73 | 40.979 | 48.940 | 17.361 | 0.00 | 0.00 |
| ATOM | 1154 | HG   | SER | 73 | 40.774 | 48.207 | 16.945 | 0.00 | 0.00 |
| ATOM | 1155 | C    | SER | 73 | 41.679 | 51.151 | 18.743 | 0.00 | 0.00 |
| ATOM | 1156 | O    | SER | 73 | 41.121 | 51.118 | 19.775 | 0.00 | 0.00 |
| ATOM | 1157 | N    | THR | 74 | 41.435 | 52.099 | 17.900 | 0.00 | 0.00 |
| ATOM | 1158 | H    | THR | 74 | 41.923 | 52.076 | 17.079 | 0.00 | 0.00 |
| ATOM | 1159 | CA   | THR | 74 | 40.451 | 53.148 | 18.085 | 0.00 | 0.00 |
| ATOM | 1160 | HA   | THR | 74 | 40.550 | 53.546 | 19.056 | 0.00 | 0.00 |
| ATOM | 1161 | CB   | THR | 74 | 40.647 | 54.256 | 17.118 | 0.00 | 0.00 |
| ATOM | 1162 | HB   | THR | 74 | 40.244 | 54.358 | 16.624 | 0.00 | 0.00 |
| ATOM | 1163 | CG2  | THR | 74 | 40.679 | 55.210 | 17.310 | 0.00 | 0.00 |
| ATOM | 1164 | 1HG2 | THR | 74 | 40.601 | 55.447 | 17.322 | 0.00 | 0.00 |
| ATOM | 1165 | 2HG2 | THR | 74 | 40.760 | 55.561 | 17.309 | 0.00 | 0.00 |
| ATOM | 1166 | 3HG2 | THR | 74 | 40.688 | 55.333 | 17.428 | 0.00 | 0.00 |
| ATOM | 1167 | OG1  | THR | 74 | 41.348 | 54.321 | 16.640 | 0.00 | 0.00 |
| ATOM | 1168 | HG1  | THR | 74 | 41.539 | 54.521 | 16.351 | 0.00 | 0.00 |
| ATOM | 1169 | C    | THR | 74 | 39.058 | 52.626 | 17.972 | 0.00 | 0.00 |
| ATOM | 1170 | O    | THR | 74 | 38.209 | 53.023 | 18.726 | 0.00 | 0.00 |
| ATOM | 1171 | N    | MET | 75 | 38.812 | 51.677 | 17.100 | 0.00 | 0.00 |
| ATOM | 1172 | H    | MET | 75 | 39.539 | 51.402 | 16.508 | 0.00 | 0.00 |
| ATOM | 1173 | CA   | MET | 75 | 37.540 | 50.999 | 16.988 | 0.00 | 0.00 |
| ATOM | 1174 | HA   | MET | 75 | 36.767 | 51.742 | 17.008 | 0.00 | 0.00 |
| ATOM | 1175 | CB   | MET | 75 | 37.476 | 50.271 | 15.661 | 0.00 | 0.00 |
| ATOM | 1176 | HB2  | MET | 75 | 38.178 | 50.181 | 15.341 | 0.00 | 0.00 |
| ATOM | 1177 | HB3  | MET | 75 | 37.209 | 49.529 | 15.715 | 0.00 | 0.00 |
| ATOM | 1178 | CG   | MET | 75 | 36.835 | 50.641 | 14.676 | 0.00 | 0.00 |
| ATOM | 1179 | HG2  | MET | 75 | 37.369 | 50.712 | 14.144 | 0.00 | 0.00 |
| ATOM | 1180 | HG3  | MET | 75 | 36.516 | 49.989 | 14.518 | 0.00 | 0.00 |
| ATOM | 1181 | SD   | MET | 75 | 35.732 | 51.941 | 14.550 | 0.00 | 0.00 |
| ATOM | 1182 | CE   | MET | 75 | 36.291 | 52.829 | 13.306 | 0.00 | 0.00 |
| ATOM | 1183 | HE1  | MET | 75 | 36.429 | 52.945 | 13.108 | 0.00 | 0.00 |
| ATOM | 1184 | HE2  | MET | 75 | 36.387 | 53.007 | 12.987 | 0.00 | 0.00 |
| ATOM | 1185 | HE3  | MET | 75 | 36.391 | 53.070 | 13.063 | 0.00 | 0.00 |
| ATOM | 1186 | C    | MET | 75 | 37.268 | 50.067 | 18.151 | 0.00 | 0.00 |
| ATOM | 1187 | O    | MET | 75 | 36.132 | 49.859 | 18.526 | 0.00 | 0.00 |
| ATOM | 1188 | N    | GLY | 76 | 38.296 | 49.591 | 18.806 | 0.00 | 0.00 |
| ATOM | 1189 | H    | GLY | 76 | 39.201 | 49.761 | 18.442 | 0.00 | 0.00 |
| ATOM | 1190 | CA   | GLY | 76 | 38.181 | 48.909 | 20.069 | 0.00 | 0.00 |
| ATOM | 1191 | HA2  | GLY | 76 | 37.570 | 48.056 | 19.955 | 0.00 | 0.00 |
| ATOM | 1192 | HA3  | GLY | 76 | 39.154 | 48.595 | 20.350 | 0.00 | 0.00 |
| ATOM | 1193 | C    | GLY | 76 | 37.600 | 49.754 | 21.179 | 0.00 | 0.00 |
| ATOM | 1194 | O    | GLY | 76 | 36.753 | 49.297 | 21.924 | 0.00 | 0.00 |
| ATOM | 1195 | N    | GLN | 77 | 37.970 | 51.021 | 21.239 | 0.00 | 0.00 |
| ATOM | 1196 | H    | GLN | 77 | 38.658 | 51.336 | 20.600 | 0.00 | 0.00 |
| ATOM | 1197 | CA   | GLN | 77 | 37.423 | 51.983 | 22.180 | 0.00 | 0.00 |
| ATOM | 1198 | HA   | GLN | 77 | 37.454 | 51.553 | 23.160 | 0.00 | 0.00 |
| ATOM | 1199 | CB   | GLN | 77 | 38.286 | 53.236 | 22.179 | 0.00 | 0.00 |
| ATOM | 1200 | HB2  | GLN | 77 | 38.823 | 53.238 | 21.717 | 0.00 | 0.00 |
| ATOM | 1201 | HB3  | GLN | 77 | 37.982 | 53.894 | 22.000 | 0.00 | 0.00 |
| ATOM | 1202 | CG   | GLN | 77 | 38.833 | 53.650 | 23.044 | 0.00 | 0.00 |
| ATOM | 1203 | HG2  | GLN | 77 | 38.834 | 53.907 | 23.010 | 0.00 | 0.00 |
| ATOM | 1204 | HG3  | GLN | 77 | 38.834 | 53.691 | 23.422 | 0.00 | 0.00 |
| ATOM | 1205 | CD   | GLN | 77 | 39.412 | 53.696 | 23.450 | 0.00 | 0.00 |
| ATOM | 1206 | OE1  | GLN | 77 | 39.428 | 53.601 | 23.653 | 0.00 | 0.00 |
| ATOM | 1207 | NE2  | GLN | 77 | 39.909 | 53.849 | 23.583 | 0.00 | 0.00 |
| ATOM | 1208 | 1HE2 | GLN | 77 | 40.295 | 53.871 | 23.841 | 0.00 | 0.00 |
| ATOM | 1209 | 2HE2 | GLN | 77 | 39.921 | 53.940 | 23.436 | 0.00 | 0.00 |
| ATOM | 1210 | C    | GLN | 77 | 35.960 | 52.309 | 21.900 | 0.00 | 0.00 |
| ATOM | 1211 | O    | GLN | 77 | 35.186 | 52.445 | 22.824 | 0.00 | 0.00 |
| ATOM | 1212 | N    | VAL | 78 | 35.546 | 52.346 | 20.645 | 0.00 | 0.00 |
| ATOM | 1213 | H    | VAL | 78 | 36.231 | 52.257 | 19.933 | 0.00 | 0.00 |
| ATOM | 1214 | CA   | VAL | 78 | 34.133 | 52.453 | 20.258 | 0.00 | 0.00 |
| ATOM | 1215 | HA   | VAL | 78 | 33.706 | 53.295 | 20.775 | 0.00 | 0.00 |
| ATOM | 1216 | CB   | VAL | 78 | 33.979 | 52.701 | 18.758 | 0.00 | 0.00 |
| ATOM | 1217 | HB   | VAL | 78 | 34.387 | 51.873 | 18.230 | 0.00 | 0.00 |
| ATOM | 1218 | CG1  | VAL | 78 | 32.539 | 52.847 | 18.345 | 0.00 | 0.00 |
| ATOM | 1219 | 1HG1 | VAL | 78 | 32.136 | 52.418 | 18.207 | 0.00 | 0.00 |
| ATOM | 1220 | 2HG1 | VAL | 78 | 32.113 | 53.102 | 18.642 | 0.00 | 0.00 |



|      |      |      |     |    |        |        |        |      |      |
|------|------|------|-----|----|--------|--------|--------|------|------|
| ATOM | 1221 | 3HG1 | VAL | 78 | 32.315 | 53.131 | 17.855 | 0.00 | 0.00 |
| ATOM | 1222 | CG2  | VAL | 78 | 34.699 | 53.953 | 18.309 | 0.00 | 0.00 |
| ATOM | 1223 | 1HG2 | VAL | 78 | 34.793 | 54.399 | 18.429 | 0.00 | 0.00 |
| ATOM | 1224 | 2HG2 | VAL | 78 | 35.128 | 54.118 | 18.186 | 0.00 | 0.00 |
| ATOM | 1225 | 3HG2 | VAL | 78 | 34.706 | 54.257 | 17.961 | 0.00 | 0.00 |
| ATOM | 1226 | C    | VAL | 78 | 33.357 | 51.211 | 20.699 | 0.00 | 0.00 |
| ATOM | 1227 | O    | VAL | 78 | 32.278 | 51.325 | 21.256 | 0.00 | 0.00 |
| ATOM | 1228 | N    | GLY | 79 | 33.933 | 50.025 | 20.559 | 0.00 | 0.00 |
| ATOM | 1229 | H    | GLY | 79 | 34.805 | 49.990 | 20.078 | 0.00 | 0.00 |
| ATOM | 1230 | CA   | GLY | 79 | 33.381 | 48.778 | 21.085 | 0.00 | 0.00 |
| ATOM | 1231 | HA2  | GLY | 79 | 32.419 | 48.598 | 20.648 | 0.00 | 0.00 |
| ATOM | 1232 | HA3  | GLY | 79 | 34.036 | 47.976 | 20.809 | 0.00 | 0.00 |
| ATOM | 1233 | C    | GLY | 79 | 33.224 | 48.757 | 22.600 | 0.00 | 0.00 |
| ATOM | 1234 | O    | GLY | 79 | 32.233 | 48.250 | 23.090 | 0.00 | 0.00 |
| ATOM | 1235 | N    | ARG | 80 | 34.133 | 49.366 | 23.349 | 0.00 | 0.00 |
| ATOM | 1236 | H    | ARG | 80 | 34.936 | 49.710 | 22.886 | 0.00 | 0.00 |
| ATOM | 1237 | CA   | ARG | 80 | 34.034 | 49.551 | 24.799 | 0.00 | 0.00 |
| ATOM | 1238 | HA   | ARG | 80 | 33.742 | 48.606 | 25.231 | 0.00 | 0.00 |
| ATOM | 1239 | CB   | ARG | 80 | 35.409 | 49.940 | 25.350 | 0.00 | 0.00 |
| ATOM | 1240 | HB2  | ARG | 80 | 36.159 | 49.335 | 24.896 | 0.00 | 0.00 |
| ATOM | 1241 | HB3  | ARG | 80 | 35.632 | 50.954 | 25.107 | 0.00 | 0.00 |
| ATOM | 1242 | CG   | ARG | 80 | 35.510 | 49.762 | 26.843 | 0.00 | 0.00 |
| ATOM | 1243 | HG2  | ARG | 80 | 34.824 | 50.399 | 27.332 | 0.00 | 0.00 |
| ATOM | 1244 | HG3  | ARG | 80 | 35.264 | 48.765 | 27.094 | 0.00 | 0.00 |
| ATOM | 1245 | CD   | ARG | 80 | 36.893 | 50.065 | 27.334 | 0.00 | 0.00 |
| ATOM | 1246 | HD2  | ARG | 80 | 37.578 | 49.500 | 26.801 | 0.00 | 0.00 |
| ATOM | 1247 | HD3  | ARG | 80 | 37.105 | 51.062 | 27.155 | 0.00 | 0.00 |
| ATOM | 1248 | NE   | ARG | 80 | 37.031 | 49.787 | 28.718 | 0.00 | 0.00 |
| ATOM | 1249 | HE   | ARG | 80 | 36.577 | 49.420 | 29.166 | 0.00 | 0.00 |
| ATOM | 1250 | CZ   | ARG | 80 | 37.695 | 49.951 | 29.427 | 0.00 | 0.00 |
| ATOM | 1251 | NH1  | ARG | 80 | 37.722 | 49.630 | 30.613 | 0.00 | 0.00 |
| ATOM | 1252 | 1HH1 | ARG | 80 | 37.238 | 49.262 | 30.978 | 0.00 | 0.00 |
| ATOM | 1253 | 2HH1 | ARG | 80 | 38.218 | 49.737 | 31.140 | 0.00 | 0.00 |
| ATOM | 1254 | NH2  | ARG | 80 | 38.339 | 50.420 | 29.005 | 0.00 | 0.00 |
| ATOM | 1255 | 1HH2 | ARG | 80 | 38.338 | 50.704 | 28.110 | 0.00 | 0.00 |
| ATOM | 1256 | 2HH2 | ARG | 80 | 38.809 | 50.524 | 29.599 | 0.00 | 0.00 |
| ATOM | 1257 | C    | ARG | 80 | 32.961 | 50.555 | 25.195 | 0.00 | 0.00 |
| ATOM | 1258 | O    | ARG | 80 | 32.210 | 50.303 | 26.112 | 0.00 | 0.00 |
| ATOM | 1259 | N    | GLN | 81 | 32.821 | 51.645 | 24.461 | 0.00 | 0.00 |
| ATOM | 1260 | H    | GLN | 81 | 33.491 | 51.798 | 23.746 | 0.00 | 0.00 |
| ATOM | 1261 | CA   | GLN | 81 | 31.758 | 52.631 | 24.631 | 0.00 | 0.00 |
| ATOM | 1262 | HA   | GLN | 81 | 31.728 | 52.909 | 25.672 | 0.00 | 0.00 |
| ATOM | 1263 | CB   | GLN | 81 | 32.113 | 53.872 | 23.817 | 0.00 | 0.00 |
| ATOM | 1264 | HB2  | GLN | 81 | 33.013 | 54.068 | 23.867 | 0.00 | 0.00 |
| ATOM | 1265 | HB3  | GLN | 81 | 31.949 | 53.764 | 22.917 | 0.00 | 0.00 |
| ATOM | 1266 | CG   | GLN | 81 | 31.522 | 55.020 | 24.142 | 0.00 | 0.00 |
| ATOM | 1267 | HG2  | GLN | 81 | 30.617 | 54.879 | 24.060 | 0.00 | 0.00 |
| ATOM | 1268 | HG3  | GLN | 81 | 31.676 | 55.117 | 25.045 | 0.00 | 0.00 |
| ATOM | 1269 | CD   | GLN | 81 | 31.932 | 56.234 | 23.388 | 0.00 | 0.00 |
| ATOM | 1270 | OE1  | GLN | 81 | 32.482 | 56.344 | 22.581 | 0.00 | 0.00 |
| ATOM | 1271 | NE2  | GLN | 81 | 31.681 | 57.199 | 23.605 | 0.00 | 0.00 |
| ATOM | 1272 | 1HE2 | GLN | 81 | 31.962 | 57.985 | 23.103 | 0.00 | 0.00 |
| ATOM | 1273 | 2HE2 | GLN | 81 | 31.226 | 57.142 | 24.254 | 0.00 | 0.00 |
| ATOM | 1274 | C    | GLN | 81 | 30.375 | 52.069 | 24.266 | 0.00 | 0.00 |
| ATOM | 1275 | O    | GLN | 81 | 29.395 | 52.435 | 24.860 | 0.00 | 0.00 |
| ATOM | 1276 | N    | LEU | 82 | 30.285 | 51.135 | 23.338 | 0.00 | 0.00 |
| ATOM | 1277 | H    | LEU | 82 | 31.096 | 50.960 | 22.801 | 0.00 | 0.00 |
| ATOM | 1278 | CA   | LEU | 82 | 29.070 | 50.388 | 23.022 | 0.00 | 0.00 |
| ATOM | 1279 | HA   | LEU | 82 | 28.246 | 51.088 | 23.013 | 0.00 | 0.00 |
| ATOM | 1280 | CB   | LEU | 82 | 29.222 | 49.790 | 21.617 | 0.00 | 0.00 |
| ATOM | 1281 | HB2  | LEU | 82 | 29.507 | 50.570 | 20.941 | 0.00 | 0.00 |
| ATOM | 1282 | HB3  | LEU | 82 | 30.021 | 49.077 | 21.633 | 0.00 | 0.00 |
| ATOM | 1283 | CG   | LEU | 82 | 27.990 | 49.095 | 21.050 | 0.00 | 0.00 |
| ATOM | 1284 | HG   | LEU | 82 | 27.677 | 48.328 | 21.718 | 0.00 | 0.00 |
| ATOM | 1285 | CD1  | LEU | 82 | 26.839 | 50.041 | 20.854 | 0.00 | 0.00 |
| ATOM | 1286 | 1HD1 | LEU | 82 | 26.529 | 50.250 | 21.007 | 0.00 | 0.00 |
| ATOM | 1287 | 2HD1 | LEU | 82 | 26.680 | 50.401 | 20.742 | 0.00 | 0.00 |
| ATOM | 1288 | 3HD1 | LEU | 82 | 26.454 | 50.153 | 20.680 | 0.00 | 0.00 |
| ATOM | 1289 | CD2  | LEU | 82 | 28.320 | 48.471 | 19.718 | 0.00 | 0.00 |
| ATOM | 1290 | 1HD2 | LEU | 82 | 28.514 | 48.282 | 19.436 | 0.00 | 0.00 |
| ATOM | 1291 | 2HD2 | LEU | 82 | 28.387 | 48.427 | 19.347 | 0.00 | 0.00 |
| ATOM | 1292 | 3HD2 | LEU | 82 | 28.309 | 48.231 | 19.403 | 0.00 | 0.00 |
| ATOM | 1293 | C    | LEU | 82 | 28.751 | 49.329 | 24.088 | 0.00 | 0.00 |
| ATOM | 1294 | O    | LEU | 82 | 27.595 | 49.076 | 24.369 | 0.00 | 0.00 |
| ATOM | 1295 | N    | ALA | 83 | 29.750 | 48.738 | 24.728 | 0.00 | 0.00 |
| ATOM | 1296 | H    | ALA | 83 | 30.680 | 48.946 | 24.439 | 0.00 | 0.00 |
| ATOM | 1297 | CA   | ALA | 83 | 29.569 | 47.762 | 25.789 | 0.00 | 0.00 |
| ATOM | 1298 | HA   | ALA | 83 | 28.922 | 46.986 | 25.412 | 0.00 | 0.00 |
| ATOM | 1299 | CB   | ALA | 83 | 30.911 | 47.113 | 26.119 | 0.00 | 0.00 |
| ATOM | 1300 | HB1  | ALA | 83 | 31.024 | 46.652 | 26.430 | 0.00 | 0.00 |
| ATOM | 1301 | HB2  | ALA | 83 | 31.283 | 46.884 | 25.780 | 0.00 | 0.00 |
| ATOM | 1302 | HB3  | ALA | 83 | 31.375 | 47.309 | 26.384 | 0.00 | 0.00 |
| ATOM | 1303 | C    | ALA | 83 | 28.873 | 48.342 | 27.023 | 0.00 | 0.00 |
| ATOM | 1304 | O    | ALA | 83 | 28.016 | 47.683 | 27.583 | 0.00 | 0.00 |
| ATOM | 1305 | N    | ILE | 84 | 29.132 | 49.590 | 27.398 | 0.00 | 0.00 |
| ATOM | 1306 | H    | ILE | 84 | 29.845 | 50.088 | 26.918 | 0.00 | 0.00 |
| ATOM | 1307 | CA   | ILE | 84 | 28.402 | 50.259 | 28.488 | 0.00 | 0.00 |
| ATOM | 1308 | HA   | ILE | 84 | 28.322 | 49.542 | 29.292 | 0.00 | 0.00 |
| ATOM | 1309 | CB   | ILE | 84 | 29.152 | 51.460 | 29.070 | 0.00 | 0.00 |
| ATOM | 1310 | HB   | ILE | 84 | 28.551 | 51.866 | 29.858 | 0.00 | 0.00 |
| ATOM | 1311 | CG2  | ILE | 84 | 30.447 | 51.004 | 29.702 | 0.00 | 0.00 |
| ATOM | 1312 | 1HG2 | ILE | 84 | 30.711 | 51.170 | 30.158 | 0.00 | 0.00 |
| ATOM | 1313 | 2HG2 | ILE | 84 | 30.612 | 50.526 | 29.908 | 0.00 | 0.00 |
| ATOM | 1314 | 3HG2 | ILE | 84 | 30.965 | 50.991 | 29.531 | 0.00 | 0.00 |
| ATOM | 1315 | CG1  | ILE | 84 | 29.388 | 52.568 | 28.067 | 0.00 | 0.00 |
| ATOM | 1316 | ZHG1 | ILE | 84 | 30.073 | 52.290 | 27.429 | 0.00 | 0.00 |
| ATOM | 1317 | 3HG1 | ILE | 84 | 28.569 | 52.760 | 27.557 | 0.00 | 0.00 |
| ATOM | 1318 | CD1  | ILE | 84 | 29.809 | 53.827 | 28.576 | 0.00 | 0.00 |
| ATOM | 1319 | 1HD1 | ILE | 84 | 29.934 | 54.173 | 28.600 | 0.00 | 0.00 |
| ATOM | 1320 | 2HD1 | ILE | 84 | 29.816 | 54.159 | 28.716 | 0.00 | 0.00 |
| ATOM | 1321 | 3HD1 | ILE | 84 | 29.961 | 54.070 | 28.758 | 0.00 | 0.00 |
| ATOM | 1322 | C    | ILE | 84 | 26.943 | 50.602 | 28.139 | 0.00 | 0.00 |
| ATOM | 1323 | O    | ILE | 84 | 26.150 | 50.797 | 29.030 | 0.00 | 0.00 |
| ATOM | 1324 | N    | ILE | 85 | 26.560 | 50.602 | 26.872 | 0.00 | 0.00 |
| ATOM | 1325 | H    | ILE | 85 | 27.253 | 50.467 | 26.183 | 0.00 | 0.00 |

|      |      |      |     |    |        |        |        |      |      |
|------|------|------|-----|----|--------|--------|--------|------|------|
| ATOM | 1326 | CA   | ILE | 85 | 25.163 | 50.664 | 26.424 | 0.00 | 0.00 |
| ATOM | 1327 | HA   | ILE | 85 | 24.597 | 51.275 | 27.112 | 0.00 | 0.00 |
| ATOM | 1328 | CB   | ILE | 85 | 25.061 | 51.321 | 25.036 | 0.00 | 0.00 |
| ATOM | 1329 | HB   | ILE | 85 | 25.583 | 50.714 | 24.348 | 0.00 | 0.00 |
| ATOM | 1330 | CG2  | ILE | 85 | 23.636 | 51.398 | 24.567 | 0.00 | 0.00 |
| ATOM | 1331 | 1HG2 | ILE | 85 | 23.220 | 51.403 | 24.656 | 0.00 | 0.00 |
| ATOM | 1332 | 2HG2 | ILE | 85 | 23.294 | 51.223 | 24.328 | 0.00 | 0.00 |
| ATOM | 1333 | 3HG2 | ILE | 85 | 23.348 | 51.604 | 24.350 | 0.00 | 0.00 |
| ATOM | 1334 | CG1  | ILE | 85 | 25.688 | 52.691 | 24.979 | 0.00 | 0.00 |
| ATOM | 1335 | 2HG1 | ILE | 85 | 25.962 | 52.879 | 25.364 | 0.00 | 0.00 |
| ATOM | 1336 | 3HG1 | ILE | 85 | 26.090 | 52.881 | 24.635 | 0.00 | 0.00 |
| ATOM | 1337 | CD1  | ILE | 85 | 25.479 | 53.590 | 24.840 | 0.00 | 0.00 |
| ATOM | 1338 | 1HD1 | ILE | 85 | 25.405 | 53.947 | 24.930 | 0.00 | 0.00 |
| ATOM | 1339 | 2HD1 | ILE | 85 | 25.630 | 53.849 | 24.753 | 0.00 | 0.00 |
| ATOM | 1340 | 3HD1 | ILE | 85 | 25.272 | 53.640 | 24.724 | 0.00 | 0.00 |
| ATOM | 1341 | C    | ILE | 85 | 24.525 | 49.272 | 26.463 | 0.00 | 0.00 |
| ATOM | 1342 | O    | ILE | 85 | 23.396 | 49.129 | 26.903 | 0.00 | 0.00 |
| ATOM | 1343 | N    | GLY | 86 | 25.260 | 48.228 | 26.094 | 0.00 | 0.00 |
| ATOM | 1344 | H    | GLY | 86 | 26.159 | 48.404 | 25.705 | 0.00 | 0.00 |
| ATOM | 1345 | CA   | GLY | 86 | 24.853 | 46.832 | 26.277 | 0.00 | 0.00 |
| ATOM | 1346 | HA2  | GLY | 86 | 23.933 | 46.648 | 25.749 | 0.00 | 0.00 |
| ATOM | 1347 | HA3  | GLY | 86 | 25.610 | 46.202 | 25.840 | 0.00 | 0.00 |
| ATOM | 1348 | C    | GLY | 86 | 24.673 | 46.426 | 27.743 | 0.00 | 0.00 |
| ATOM | 1349 | O    | GLY | 86 | 23.812 | 45.631 | 28.063 | 0.00 | 0.00 |
| ATOM | 1350 | N    | ASP | 87 | 25.419 | 47.021 | 28.658 | 0.00 | 0.00 |
| ATOM | 1351 | H    | ASP | 87 | 26.181 | 47.574 | 28.341 | 0.00 | 0.00 |
| ATOM | 1352 | CA   | ASP | 87 | 25.230 | 46.907 | 30.107 | 0.00 | 0.00 |
| ATOM | 1353 | HA   | ASP | 87 | 25.126 | 45.861 | 30.355 | 0.00 | 0.00 |
| ATOM | 1354 | CB   | ASP | 87 | 26.475 | 47.435 | 30.808 | 0.00 | 0.00 |
| ATOM | 1355 | HB2  | ASP | 87 | 27.333 | 46.912 | 30.443 | 0.00 | 0.00 |
| ATOM | 1356 | HB3  | ASP | 87 | 26.600 | 48.465 | 30.566 | 0.00 | 0.00 |
| ATOM | 1357 | CG   | ASP | 87 | 26.418 | 47.287 | 32.301 | 0.00 | 0.00 |
| ATOM | 1358 | OD1  | ASP | 87 | 26.427 | 46.195 | 32.796 | 0.00 | 0.00 |
| ATOM | 1359 | OD2  | ASP | 87 | 26.388 | 48.263 | 32.989 | 0.00 | 0.00 |
| ATOM | 1360 | C    | ASP | 87 | 23.972 | 47.637 | 30.598 | 0.00 | 0.00 |
| ATOM | 1361 | O    | ASP | 87 | 23.387 | 47.249 | 31.582 | 0.00 | 0.00 |
| ATOM | 1362 | N    | ASP | 88 | 23.507 | 48.660 | 29.906 | 0.00 | 0.00 |
| ATOM | 1363 | H    | ASP | 88 | 24.002 | 48.939 | 29.098 | 0.00 | 0.00 |
| ATOM | 1364 | CA   | ASP | 88 | 22.295 | 49.401 | 30.261 | 0.00 | 0.00 |
| ATOM | 1365 | HA   | ASP | 88 | 22.275 | 49.488 | 31.338 | 0.00 | 0.00 |
| ATOM | 1366 | CB   | ASP | 88 | 22.373 | 50.811 | 29.692 | 0.00 | 0.00 |
| ATOM | 1367 | HB2  | ASP | 88 | 23.348 | 51.209 | 29.864 | 0.00 | 0.00 |
| ATOM | 1368 | HB3  | ASP | 88 | 22.216 | 50.789 | 28.638 | 0.00 | 0.00 |
| ATOM | 1369 | CG   | ASP | 88 | 21.380 | 51.754 | 30.335 | 0.00 | 0.00 |
| ATOM | 1370 | OD1  | ASP | 88 | 21.140 | 52.049 | 31.025 | 0.00 | 0.00 |
| ATOM | 1371 | OD2  | ASP | 88 | 20.853 | 52.242 | 30.156 | 0.00 | 0.00 |
| ATOM | 1372 | C    | ASP | 88 | 21.006 | 48.679 | 29.846 | 0.00 | 0.00 |
| ATOM | 1373 | O    | ASP | 88 | 20.012 | 48.782 | 30.527 | 0.00 | 0.00 |
| ATOM | 1374 | N    | ILE | 89 | 21.024 | 47.880 | 28.789 | 0.00 | 0.00 |
| ATOM | 1375 | H    | ILE | 89 | 21.849 | 47.875 | 28.240 | 0.00 | 0.00 |
| ATOM | 1376 | CA   | ILE | 89 | 19.927 | 46.962 | 28.434 | 0.00 | 0.00 |
| ATOM | 1377 | HA   | ILE | 89 | 19.000 | 47.437 | 28.723 | 0.00 | 0.00 |
| ATOM | 1378 | CB   | ILE | 89 | 19.815 | 46.697 | 26.923 | 0.00 | 0.00 |
| ATOM | 1379 | HB   | ILE | 89 | 18.968 | 46.052 | 26.780 | 0.00 | 0.00 |
| ATOM | 1380 | CG2  | ILE | 89 | 19.503 | 47.982 | 26.178 | 0.00 | 0.00 |
| ATOM | 1381 | 1HG2 | ILE | 89 | 19.786 | 48.298 | 25.753 | 0.00 | 0.00 |
| ATOM | 1382 | 2HG2 | ILE | 89 | 19.051 | 48.086 | 25.848 | 0.00 | 0.00 |
| ATOM | 1383 | 3HG2 | ILE | 89 | 19.417 | 48.493 | 26.383 | 0.00 | 0.00 |
| ATOM | 1384 | CG1  | ILE | 89 | 21.026 | 45.995 | 26.330 | 0.00 | 0.00 |
| ATOM | 1385 | 2HG1 | ILE | 89 | 21.737 | 46.621 | 26.222 | 0.00 | 0.00 |
| ATOM | 1386 | 3HG1 | ILE | 89 | 21.341 | 45.313 | 26.924 | 0.00 | 0.00 |
| ATOM | 1387 | CD1  | ILE | 89 | 20.897 | 45.353 | 25.088 | 0.00 | 0.00 |
| ATOM | 1388 | 1HD1 | ILE | 89 | 21.050 | 45.213 | 24.785 | 0.00 | 0.00 |
| ATOM | 1389 | 2HD1 | ILE | 89 | 20.774 | 45.053 | 24.868 | 0.00 | 0.00 |
| ATOM | 1390 | 3HD1 | ILE | 89 | 20.792 | 45.310 | 24.719 | 0.00 | 0.00 |
| ATOM | 1391 | C    | ILE | 89 | 19.948 | 45.654 | 29.232 | 0.00 | 0.00 |
| ATOM | 1392 | O    | ILE | 89 | 19.018 | 44.868 | 29.131 | 0.00 | 0.00 |
| ATOM | 1393 | N    | ASN | 90 | 20.972 | 45.408 | 30.051 | 0.00 | 0.00 |
| ATOM | 1394 | H    | ASN | 90 | 21.708 | 46.074 | 30.090 | 0.00 | 0.00 |
| ATOM | 1395 | CA   | ASN | 90 | 21.103 | 44.193 | 30.854 | 0.00 | 0.00 |
| ATOM | 1396 | HA   | ASN | 90 | 20.968 | 43.352 | 30.200 | 0.00 | 0.00 |
| ATOM | 1397 | CB   | ASN | 90 | 22.521 | 44.100 | 31.408 | 0.00 | 0.00 |
| ATOM | 1398 | HB2  | ASN | 90 | 23.217 | 44.371 | 30.645 | 0.00 | 0.00 |
| ATOM | 1399 | HB3  | ASN | 90 | 22.637 | 44.785 | 32.213 | 0.00 | 0.00 |
| ATOM | 1400 | CG   | ASN | 90 | 22.887 | 42.729 | 31.882 | 0.00 | 0.00 |
| ATOM | 1401 | OD1  | ASN | 90 | 22.628 | 41.763 | 31.340 | 0.00 | 0.00 |
| ATOM | 1402 | ND2  | ASN | 90 | 23.528 | 42.596 | 32.885 | 0.00 | 0.00 |
| ATOM | 1403 | 1HD2 | ASN | 90 | 23.805 | 41.704 | 33.183 | 0.00 | 0.00 |
| ATOM | 1404 | 2HD2 | ASN | 90 | 23.738 | 43.378 | 33.347 | 0.00 | 0.00 |
| ATOM | 1405 | C    | ASN | 90 | 20.030 | 44.065 | 31.943 | 0.00 | 0.00 |
| ATOM | 1406 | O    | ASN | 90 | 19.804 | 43.021 | 32.431 | 0.00 | 0.00 |
| ATOM | 1407 | N    | ARG | 91 | 19.317 | 45.107 | 32.282 | 0.00 | 0.00 |
| ATOM | 1408 | H    | ARG | 91 | 19.570 | 45.914 | 31.842 | 0.00 | 0.00 |
| ATOM | 1409 | CA   | ARG | 91 | 18.069 | 45.111 | 33.049 | 0.00 | 0.00 |
| ATOM | 1410 | HA   | ARG | 91 | 17.942 | 44.130 | 33.481 | 0.00 | 0.00 |
| ATOM | 1411 | CB   | ARG | 91 | 18.155 | 46.099 | 34.214 | 0.00 | 0.00 |
| ATOM | 1412 | HB2  | ARG | 91 | 17.309 | 45.942 | 34.853 | 0.00 | 0.00 |
| ATOM | 1413 | HB3  | ARG | 91 | 19.039 | 45.884 | 34.780 | 0.00 | 0.00 |
| ATOM | 1414 | CG   | ARG | 91 | 18.167 | 47.564 | 33.805 | 0.00 | 0.00 |
| ATOM | 1415 | HG2  | ARG | 91 | 18.859 | 47.706 | 33.016 | 0.00 | 0.00 |
| ATOM | 1416 | HG3  | ARG | 91 | 17.204 | 47.834 | 33.476 | 0.00 | 0.00 |
| ATOM | 1417 | CD   | ARG | 91 | 18.557 | 48.464 | 34.942 | 0.00 | 0.00 |
| ATOM | 1418 | HD2  | ARG | 91 | 17.894 | 48.278 | 35.743 | 0.00 | 0.00 |
| ATOM | 1419 | HD3  | ARG | 91 | 19.530 | 48.228 | 35.262 | 0.00 | 0.00 |
| ATOM | 1420 | NE   | ARG | 91 | 18.493 | 49.874 | 34.586 | 0.00 | 0.00 |
| ATOM | 1421 | HE   | ARG | 91 | 17.730 | 50.380 | 34.909 | 0.00 | 0.00 |
| ATOM | 1422 | CZ   | ARG | 91 | 19.323 | 50.557 | 33.869 | 0.00 | 0.00 |
| ATOM | 1423 | NH1  | ARG | 91 | 20.391 | 50.081 | 33.411 | 0.00 | 0.00 |
| ATOM | 1424 | 1HH1 | ARG | 91 | 20.638 | 49.149 | 33.578 | 0.00 | 0.00 |
| ATOM | 1425 | 2HH1 | ARG | 91 | 20.928 | 50.650 | 32.834 | 0.00 | 0.00 |
| ATOM | 1426 | NH2  | ARG | 91 | 19.084 | 51.765 | 33.577 | 0.00 | 0.00 |
| ATOM | 1427 | 1HH2 | ARG | 91 | 18.279 | 52.179 | 33.900 | 0.00 | 0.00 |
| ATOM | 1428 | 2HH2 | ARG | 91 | 19.699 | 52.234 | 32.984 | 0.00 | 0.00 |
| ATOM | 1429 | C    | ARG | 91 | 16.862 | 45.344 | 32.143 | 0.00 | 0.00 |
| ATOM | 1430 | O    | ARG | 91 | 16.938 | 46.103 | 31.194 | 0.00 | 0.00 |

|      |      |      |     |    |        |        |        |      |      |
|------|------|------|-----|----|--------|--------|--------|------|------|
| ATOM | 1431 | N    | ARG | 92 | 15.751 | 44.703 | 32.460 | 0.00 | 0.00 |
| ATOM | 1432 | H    | ARG | 92 | 15.821 | 44.125 | 33.262 | 0.00 | 0.00 |
| ATOM | 1433 | CA   | ARG | 92 | 14.461 | 44.667 | 31.747 | 0.00 | 0.00 |
| ATOM | 1434 | HA   | ARG | 92 | 13.838 | 43.992 | 32.299 | 0.00 | 0.00 |
| ATOM | 1435 | CB   | ARG | 92 | 13.766 | 46.016 | 31.783 | 0.00 | 0.00 |
| ATOM | 1436 | HB2  | ARG | 92 | 14.290 | 46.699 | 31.164 | 0.00 | 0.00 |
| ATOM | 1437 | HB3  | ARG | 92 | 12.785 | 45.898 | 31.380 | 0.00 | 0.00 |
| ATOM | 1438 | CG   | ARG | 92 | 13.644 | 46.616 | 33.160 | 0.00 | 0.00 |
| ATOM | 1439 | HG2  | ARG | 92 | 13.245 | 45.897 | 33.804 | 0.00 | 0.00 |
| ATOM | 1440 | HG3  | ARG | 92 | 14.597 | 46.895 | 33.517 | 0.00 | 0.00 |
| ATOM | 1441 | CD   | ARG | 92 | 12.756 | 47.814 | 33.209 | 0.00 | 0.00 |
| ATOM | 1442 | HD2  | ARG | 92 | 11.814 | 47.515 | 32.931 | 0.00 | 0.00 |
| ATOM | 1443 | HD3  | ARG | 92 | 12.699 | 48.180 | 34.189 | 0.00 | 0.00 |
| ATOM | 1444 | NE   | ARG | 92 | 13.168 | 48.852 | 32.379 | 0.00 | 0.00 |
| ATOM | 1445 | HE   | ARG | 92 | 12.965 | 48.858 | 31.715 | 0.00 | 0.00 |
| ATOM | 1446 | CZ   | ARG | 92 | 13.740 | 49.820 | 32.430 | 0.00 | 0.00 |
| ATOM | 1447 | NH1  | ARG | 92 | 14.034 | 49.995 | 33.259 | 0.00 | 0.00 |
| ATOM | 1448 | 1HH1 | ARG | 92 | 13.808 | 49.415 | 33.925 | 0.00 | 0.00 |
| ATOM | 1449 | 2HH1 | ARG | 92 | 14.444 | 50.759 | 33.256 | 0.00 | 0.00 |
| ATOM | 1450 | NH2  | ARG | 92 | 14.036 | 50.655 | 31.633 | 0.00 | 0.00 |
| ATOM | 1451 | 1HH2 | ARG | 92 | 13.848 | 50.549 | 30.966 | 0.00 | 0.00 |
| ATOM | 1452 | 2HH2 | ARG | 92 | 14.474 | 51.371 | 31.666 | 0.00 | 0.00 |
| ATOM | 1453 | C    | ARG | 92 | 14.453 | 44.095 | 30.335 | 0.00 | 0.00 |
| ATOM | 1454 | O    | ARG | 92 | 13.521 | 43.469 | 29.989 | 0.00 | 0.00 |
| ATOM | 1455 | N    | TYR | 93 | 15.431 | 44.291 | 29.518 | 0.00 | 0.00 |
| ATOM | 1456 | H    | TYR | 93 | 16.156 | 44.828 | 29.857 | 0.00 | 0.00 |
| ATOM | 1457 | CA   | TYR | 93 | 15.383 | 43.999 | 28.081 | 0.00 | 0.00 |
| ATOM | 1458 | HA   | TYR | 93 | 14.365 | 43.762 | 27.803 | 0.00 | 0.00 |
| ATOM | 1459 | CB   | TYR | 93 | 15.779 | 45.252 | 27.305 | 0.00 | 0.00 |
| ATOM | 1460 | HB2  | TYR | 93 | 16.819 | 45.455 | 27.489 | 0.00 | 0.00 |
| ATOM | 1461 | HB3  | TYR | 93 | 15.675 | 45.044 | 26.256 | 0.00 | 0.00 |
| ATOM | 1462 | CG   | TYR | 93 | 14.974 | 46.497 | 27.627 | 0.00 | 0.00 |
| ATOM | 1463 | CD1  | TYR | 93 | 15.607 | 47.642 | 28.062 | 0.00 | 0.00 |
| ATOM | 1464 | HD1  | TYR | 93 | 16.655 | 47.641 | 28.165 | 0.00 | 0.00 |
| ATOM | 1465 | CE1  | TYR | 93 | 14.867 | 48.781 | 28.393 | 0.00 | 0.00 |
| ATOM | 1466 | HE1  | TYR | 93 | 15.344 | 49.651 | 28.744 | 0.00 | 0.00 |
| ATOM | 1467 | CZ   | TYR | 93 | 13.490 | 48.784 | 28.280 | 0.00 | 0.00 |
| ATOM | 1468 | OH   | TYR | 93 | 12.788 | 49.877 | 28.629 | 0.00 | 0.00 |
| ATOM | 1469 | HH   | TYR | 93 | 11.868 | 49.752 | 28.503 | 0.00 | 0.00 |
| ATOM | 1470 | CE2  | TYR | 93 | 12.854 | 47.644 | 27.835 | 0.00 | 0.00 |
| ATOM | 1471 | HE2  | TYR | 93 | 11.805 | 47.636 | 27.749 | 0.00 | 0.00 |
| ATOM | 1472 | CD2  | TYR | 93 | 13.596 | 46.504 | 27.514 | 0.00 | 0.00 |
| ATOM | 1473 | HD2  | TYR | 93 | 13.105 | 45.621 | 27.203 | 0.00 | 0.00 |
| ATOM | 1474 | C    | TYR | 93 | 16.211 | 42.786 | 27.647 | 0.00 | 0.00 |
| ATOM | 1475 | O    | TYR | 93 | 15.751 | 42.011 | 26.831 | 0.00 | 0.00 |
| ATOM | 1476 | N    | ASP | 94 | 17.384 | 42.561 | 28.212 | 0.00 | 0.00 |
| ATOM | 1477 | H    | ASP | 94 | 17.738 | 43.248 | 28.838 | 0.00 | 0.00 |
| ATOM | 1478 | CA   | ASP | 94 | 18.243 | 41.426 | 27.868 | 0.00 | 0.00 |
| ATOM | 1479 | HA   | ASP | 94 | 18.399 | 41.434 | 26.802 | 0.00 | 0.00 |
| ATOM | 1480 | CB   | ASP | 94 | 19.591 | 41.619 | 28.543 | 0.00 | 0.00 |
| ATOM | 1481 | HB2  | ASP | 94 | 19.995 | 42.559 | 28.222 | 0.00 | 0.00 |
| ATOM | 1482 | HB3  | ASP | 94 | 19.448 | 41.656 | 29.604 | 0.00 | 0.00 |
| ATOM | 1483 | CG   | ASP | 94 | 20.603 | 40.539 | 28.222 | 0.00 | 0.00 |
| ATOM | 1484 | OD1  | ASP | 94 | 21.358 | 40.687 | 27.282 | 0.00 | 0.00 |
| ATOM | 1485 | OD2  | ASP | 94 | 20.702 | 39.566 | 28.942 | 0.00 | 0.00 |
| ATOM | 1486 | C    | ASP | 94 | 17.616 | 40.072 | 28.220 | 0.00 | 0.00 |
| ATOM | 1487 | O    | ASP | 94 | 17.777 | 39.106 | 27.496 | 0.00 | 0.00 |
| ATOM | 1488 | N    | SER | 95 | 16.829 | 40.009 | 29.278 | 0.00 | 0.00 |
| ATOM | 1489 | H    | SER | 95 | 16.735 | 40.834 | 29.821 | 0.00 | 0.00 |
| ATOM | 1490 | CA   | SER | 95 | 16.044 | 38.839 | 29.660 | 0.00 | 0.00 |
| ATOM | 1491 | HA   | SER | 95 | 16.699 | 37.995 | 29.708 | 0.00 | 0.00 |
| ATOM | 1492 | CB   | SER | 95 | 15.446 | 39.025 | 31.031 | 0.00 | 0.00 |
| ATOM | 1493 | HB2  | SER | 95 | 14.897 | 39.400 | 31.165 | 0.00 | 0.00 |
| ATOM | 1494 | HB3  | SER | 95 | 15.218 | 38.505 | 31.372 | 0.00 | 0.00 |
| ATOM | 1495 | OG   | SER | 95 | 15.886 | 39.369 | 31.723 | 0.00 | 0.00 |
| ATOM | 1496 | HG   | SER | 95 | 16.009 | 39.324 | 31.904 | 0.00 | 0.00 |
| ATOM | 1497 | C    | SER | 95 | 14.948 | 38.483 | 28.670 | 0.00 | 0.00 |
| ATOM | 1498 | O    | SER | 95 | 14.486 | 37.371 | 28.670 | 0.00 | 0.00 |
| ATOM | 1499 | N    | GLU | 96 | 14.547 | 39.381 | 27.789 | 0.00 | 0.00 |
| ATOM | 1500 | H    | GLU | 96 | 14.976 | 40.269 | 27.797 | 0.00 | 0.00 |
| ATOM | 1501 | CA   | GLU | 96 | 13.556 | 39.107 | 26.753 | 0.00 | 0.00 |
| ATOM | 1502 | HA   | GLU | 96 | 12.754 | 38.542 | 27.203 | 0.00 | 0.00 |
| ATOM | 1503 | CB   | GLU | 96 | 12.981 | 40.424 | 26.237 | 0.00 | 0.00 |
| ATOM | 1504 | HB2  | GLU | 96 | 13.009 | 41.162 | 27.012 | 0.00 | 0.00 |
| ATOM | 1505 | HB3  | GLU | 96 | 13.588 | 40.784 | 25.433 | 0.00 | 0.00 |
| ATOM | 1506 | CG   | GLU | 96 | 11.547 | 40.307 | 25.745 | 0.00 | 0.00 |
| ATOM | 1507 | HG2  | GLU | 96 | 11.271 | 41.227 | 25.277 | 0.00 | 0.00 |
| ATOM | 1508 | HG3  | GLU | 96 | 11.488 | 39.546 | 25.002 | 0.00 | 0.00 |
| ATOM | 1509 | CD   | GLU | 96 | 10.575 | 40.021 | 26.863 | 0.00 | 0.00 |
| ATOM | 1510 | OE1  | GLU | 96 | 10.259 | 39.977 | 27.442 | 0.00 | 0.00 |
| ATOM | 1511 | OE2  | GLU | 96 | 10.108 | 39.848 | 27.186 | 0.00 | 0.00 |
| ATOM | 1512 | C    | GLU | 96 | 14.123 | 38.258 | 25.619 | 0.00 | 0.00 |
| ATOM | 1513 | O    | GLU | 96 | 13.418 | 37.421 | 25.082 | 0.00 | 0.00 |
| ATOM | 1514 | N    | PHE | 97 | 15.412 | 38.381 | 25.298 | 0.00 | 0.00 |
| ATOM | 1515 | H    | PHE | 97 | 15.958 | 39.053 | 25.785 | 0.00 | 0.00 |
| ATOM | 1516 | CA   | PHE | 97 | 16.064 | 37.579 | 24.263 | 0.00 | 0.00 |
| ATOM | 1517 | HA   | PHE | 97 | 15.518 | 37.706 | 23.344 | 0.00 | 0.00 |
| ATOM | 1518 | CB   | PHE | 97 | 17.493 | 38.069 | 24.032 | 0.00 | 0.00 |
| ATOM | 1519 | HB2  | PHE | 97 | 18.071 | 37.806 | 24.894 | 0.00 | 0.00 |
| ATOM | 1520 | HB3  | PHE | 97 | 17.907 | 37.522 | 23.209 | 0.00 | 0.00 |
| ATOM | 1521 | CG   | PHE | 97 | 17.685 | 39.541 | 23.746 | 0.00 | 0.00 |
| ATOM | 1522 | CD1  | PHE | 97 | 16.882 | 40.207 | 22.834 | 0.00 | 0.00 |
| ATOM | 1523 | HD1  | PHE | 97 | 16.111 | 39.687 | 22.322 | 0.00 | 0.00 |
| ATOM | 1524 | CE1  | PHE | 97 | 17.071 | 41.568 | 22.592 | 0.00 | 0.00 |
| ATOM | 1525 | HE1  | PHE | 97 | 16.456 | 42.080 | 21.899 | 0.00 | 0.00 |
| ATOM | 1526 | CZ   | PHE | 97 | 18.052 | 42.270 | 23.270 | 0.00 | 0.00 |
| ATOM | 1527 | HZ   | PHE | 97 | 18.183 | 43.314 | 23.092 | 0.00 | 0.00 |
| ATOM | 1528 | CE2  | PHE | 97 | 18.877 | 41.605 | 24.158 | 0.00 | 0.00 |
| ATOM | 1529 | HE2  | PHE | 97 | 19.638 | 42.133 | 24.676 | 0.00 | 0.00 |
| ATOM | 1530 | CD2  | PHE | 97 | 18.699 | 40.243 | 24.389 | 0.00 | 0.00 |
| ATOM | 1531 | HD2  | PHE | 97 | 19.331 | 39.742 | 25.078 | 0.00 | 0.00 |
| ATOM | 1532 | C    | PHE | 97 | 16.054 | 36.082 | 24.573 | 0.00 | 0.00 |
| ATOM | 1533 | O    | PHE | 97 | 16.031 | 35.273 | 23.668 | 0.00 | 0.00 |
| ATOM | 1534 | N    | GLN | 98 | 15.972 | 35.696 | 25.835 | 0.00 | 0.00 |
| ATOM | 1535 | H    | GLN | 98 | 15.971 | 36.402 | 26.526 | 0.00 | 0.00 |

|      |      |      |     |     |        |        |        |      |      |
|------|------|------|-----|-----|--------|--------|--------|------|------|
| ATOM | 1536 | CA   | GLN | 98  | 15.848 | 34.303 | 26.268 | 0.00 | 0.00 |
| ATOM | 1537 | HA   | GLN | 98  | 16.643 | 33.745 | 25.818 | 0.00 | 0.00 |
| ATOM | 1538 | CB   | GLN | 98  | 16.000 | 34.214 | 27.773 | 0.00 | 0.00 |
| ATOM | 1539 | HB2  | GLN | 98  | 15.570 | 34.560 | 28.160 | 0.00 | 0.00 |
| ATOM | 1540 | HB3  | GLN | 98  | 15.919 | 33.605 | 28.073 | 0.00 | 0.00 |
| ATOM | 1541 | CG   | GLN | 98  | 16.827 | 34.455 | 28.361 | 0.00 | 0.00 |
| ATOM | 1542 | HG2  | GLN | 98  | 17.340 | 34.192 | 28.149 | 0.00 | 0.00 |
| ATOM | 1543 | HG3  | GLN | 98  | 16.726 | 35.025 | 28.098 | 0.00 | 0.00 |
| ATOM | 1544 | CD   | GLN | 98  | 17.135 | 34.300 | 29.609 | 0.00 | 0.00 |
| ATOM | 1545 | OE1  | GLN | 98  | 16.935 | 34.039 | 30.152 | 0.00 | 0.00 |
| ATOM | 1546 | NE2  | GLN | 98  | 17.628 | 34.457 | 30.127 | 0.00 | 0.00 |
| ATOM | 1547 | 1HE2 | GLN | 98  | 17.845 | 34.343 | 30.946 | 0.00 | 0.00 |
| ATOM | 1548 | 2HE2 | GLN | 98  | 17.794 | 34.684 | 29.714 | 0.00 | 0.00 |
| ATOM | 1549 | C    | GLN | 98  | 14.539 | 33.651 | 25.818 | 0.00 | 0.00 |
| ATOM | 1550 | O    | GLN | 98  | 14.442 | 32.465 | 25.807 | 0.00 | 0.00 |
| ATOM | 1551 | N    | THR | 99  | 13.548 | 34.406 | 25.404 | 0.00 | 0.00 |
| ATOM | 1552 | H    | THR | 99  | 13.676 | 35.379 | 25.459 | 0.00 | 0.00 |
| ATOM | 1553 | CA   | THR | 99  | 12.298 | 33.913 | 24.818 | 0.00 | 0.00 |
| ATOM | 1554 | HA   | THR | 99  | 12.087 | 32.956 | 25.255 | 0.00 | 0.00 |
| ATOM | 1555 | CB   | THR | 99  | 11.120 | 34.815 | 25.135 | 0.00 | 0.00 |
| ATOM | 1556 | HB   | THR | 99  | 10.236 | 34.328 | 24.796 | 0.00 | 0.00 |
| ATOM | 1557 | CG2  | THR | 99  | 10.970 | 35.101 | 26.590 | 0.00 | 0.00 |
| ATOM | 1558 | 1HG2 | THR | 99  | 10.896 | 35.254 | 26.948 | 0.00 | 0.00 |
| ATOM | 1559 | 2HG2 | THR | 99  | 10.858 | 35.106 | 26.958 | 0.00 | 0.00 |
| ATOM | 1560 | 3HG2 | THR | 99  | 11.011 | 35.140 | 26.925 | 0.00 | 0.00 |
| ATOM | 1561 | OG1  | THR | 99  | 11.207 | 36.031 | 24.494 | 0.00 | 0.00 |
| ATOM | 1562 | HG1  | THR | 99  | 11.904 | 36.507 | 24.778 | 0.00 | 0.00 |
| ATOM | 1563 | C    | THR | 99  | 12.381 | 33.663 | 23.320 | 0.00 | 0.00 |
| ATOM | 1564 | O    | THR | 99  | 11.440 | 33.166 | 22.742 | 0.00 | 0.00 |
| ATOM | 1565 | N    | MET | 100 | 13.496 | 33.998 | 22.694 | 0.00 | 0.00 |
| ATOM | 1566 | H    | MET | 100 | 14.202 | 34.407 | 23.252 | 0.00 | 0.00 |
| ATOM | 1567 | CA   | MET | 100 | 13.750 | 33.899 | 21.259 | 0.00 | 0.00 |
| ATOM | 1568 | HA   | MET | 100 | 12.904 | 33.455 | 20.786 | 0.00 | 0.00 |
| ATOM | 1569 | CB   | MET | 100 | 13.915 | 35.283 | 20.691 | 0.00 | 0.00 |
| ATOM | 1570 | HB2  | MET | 100 | 14.655 | 35.567 | 20.856 | 0.00 | 0.00 |
| ATOM | 1571 | HB3  | MET | 100 | 13.856 | 35.294 | 19.872 | 0.00 | 0.00 |
| ATOM | 1572 | CG   | MET | 100 | 13.172 | 36.294 | 20.978 | 0.00 | 0.00 |
| ATOM | 1573 | HG2  | MET | 100 | 12.504 | 36.083 | 20.738 | 0.00 | 0.00 |
| ATOM | 1574 | HG3  | MET | 100 | 13.153 | 36.224 | 21.731 | 0.00 | 0.00 |
| ATOM | 1575 | SD   | MET | 100 | 13.356 | 37.955 | 20.545 | 0.00 | 0.00 |
| ATOM | 1576 | CE   | MET | 100 | 12.226 | 38.735 | 21.557 | 0.00 | 0.00 |
| ATOM | 1577 | HE1  | MET | 100 | 11.923 | 38.882 | 21.716 | 0.00 | 0.00 |
| ATOM | 1578 | HE2  | MET | 100 | 12.008 | 38.838 | 21.826 | 0.00 | 0.00 |
| ATOM | 1579 | HE3  | MET | 100 | 12.060 | 38.961 | 21.740 | 0.00 | 0.00 |
| ATOM | 1580 | C    | MET | 100 | 14.947 | 33.026 | 20.908 | 0.00 | 0.00 |
| ATOM | 1581 | O    | MET | 100 | 14.936 | 32.356 | 19.904 | 0.00 | 0.00 |
| ATOM | 1582 | N    | LEU | 101 | 15.980 | 33.004 | 21.725 | 0.00 | 0.00 |
| ATOM | 1583 | H    | LEU | 101 | 15.931 | 33.580 | 22.521 | 0.00 | 0.00 |
| ATOM | 1584 | CA   | LEU | 101 | 17.243 | 32.324 | 21.452 | 0.00 | 0.00 |
| ATOM | 1585 | HA   | LEU | 101 | 17.536 | 32.571 | 20.453 | 0.00 | 0.00 |
| ATOM | 1586 | CB   | LEU | 101 | 18.295 | 32.839 | 22.427 | 0.00 | 0.00 |
| ATOM | 1587 | HB2  | LEU | 101 | 17.935 | 33.082 | 23.205 | 0.00 | 0.00 |
| ATOM | 1588 | HB3  | LEU | 101 | 18.883 | 32.212 | 22.658 | 0.00 | 0.00 |
| ATOM | 1589 | CG   | LEU | 101 | 19.035 | 33.852 | 22.101 | 0.00 | 0.00 |
| ATOM | 1590 | HG   | LEU | 101 | 18.423 | 34.181 | 21.885 | 0.00 | 0.00 |
| ATOM | 1591 | CD1  | LEU | 101 | 19.728 | 34.429 | 22.796 | 0.00 | 0.00 |
| ATOM | 1592 | 1HD1 | LEU | 101 | 19.850 | 34.486 | 23.149 | 0.00 | 0.00 |
| ATOM | 1593 | 2HD1 | LEU | 101 | 19.730 | 34.802 | 22.896 | 0.00 | 0.00 |
| ATOM | 1594 | 3HD1 | LEU | 101 | 20.095 | 34.428 | 22.849 | 0.00 | 0.00 |
| ATOM | 1595 | CD2  | LEU | 101 | 19.971 | 33.897 | 21.408 | 0.00 | 0.00 |
| ATOM | 1596 | 1HD2 | LEU | 101 | 19.775 | 33.628 | 20.815 | 0.00 | 0.00 |
| ATOM | 1597 | 2HD2 | LEU | 101 | 20.374 | 34.658 | 21.241 | 0.00 | 0.00 |
| ATOM | 1598 | 3HD2 | LEU | 101 | 20.444 | 33.443 | 21.651 | 0.00 | 0.00 |
| ATOM | 1599 | C    | LEU | 101 | 17.171 | 30.801 | 21.490 | 0.00 | 0.00 |
| ATOM | 1600 | O    | LEU | 101 | 18.015 | 30.152 | 20.938 | 0.00 | 0.00 |
| ATOM | 1601 | N    | GLN | 102 | 16.158 | 30.215 | 22.075 | 0.00 | 0.00 |
| ATOM | 1602 | H    | GLN | 102 | 15.478 | 30.799 | 22.482 | 0.00 | 0.00 |
| ATOM | 1603 | CA   | GLN | 102 | 15.935 | 28.777 | 22.111 | 0.00 | 0.00 |
| ATOM | 1604 | HA   | GLN | 102 | 16.894 | 28.316 | 22.250 | 0.00 | 0.00 |
| ATOM | 1605 | CB   | GLN | 102 | 15.107 | 28.387 | 23.334 | 0.00 | 0.00 |
| ATOM | 1606 | HB2  | GLN | 102 | 15.290 | 27.350 | 23.512 | 0.00 | 0.00 |
| ATOM | 1607 | HB3  | GLN | 102 | 15.480 | 28.918 | 24.181 | 0.00 | 0.00 |
| ATOM | 1608 | CG   | GLN | 102 | 13.599 | 28.556 | 23.282 | 0.00 | 0.00 |
| ATOM | 1609 | HG2  | GLN | 102 | 13.213 | 28.064 | 22.448 | 0.00 | 0.00 |
| ATOM | 1610 | HG3  | GLN | 102 | 13.191 | 28.078 | 24.124 | 0.00 | 0.00 |
| ATOM | 1611 | CD   | GLN | 102 | 13.099 | 29.947 | 23.283 | 0.00 | 0.00 |
| ATOM | 1612 | OE1  | GLN | 102 | 13.645 | 30.830 | 22.847 | 0.00 | 0.00 |
| ATOM | 1613 | NE2  | GLN | 102 | 12.038 | 30.190 | 23.751 | 0.00 | 0.00 |
| ATOM | 1614 | 1HE2 | GLN | 102 | 11.734 | 31.097 | 23.722 | 0.00 | 0.00 |
| ATOM | 1615 | 2HE2 | GLN | 102 | 11.567 | 29.484 | 24.124 | 0.00 | 0.00 |
| ATOM | 1616 | C    | GLN | 102 | 15.385 | 28.202 | 20.812 | 0.00 | 0.00 |
| ATOM | 1617 | O    | GLN | 102 | 15.407 | 27.022 | 20.625 | 0.00 | 0.00 |
| ATOM | 1618 | N    | HIP | 103 | 14.923 | 29.016 | 19.891 | 0.00 | 0.00 |
| ATOM | 1619 | H    | HIP | 103 | 14.921 | 29.973 | 20.108 | 0.00 | 0.00 |
| ATOM | 1620 | CA   | HIP | 103 | 14.367 | 28.598 | 18.603 | 0.00 | 0.00 |
| ATOM | 1621 | HA   | HIP | 103 | 13.928 | 27.623 | 18.733 | 0.00 | 0.00 |
| ATOM | 1622 | CB   | HIP | 103 | 13.256 | 29.554 | 18.187 | 0.00 | 0.00 |
| ATOM | 1623 | HB2  | HIP | 103 | 13.670 | 30.534 | 18.077 | 0.00 | 0.00 |
| ATOM | 1624 | HB3  | HIP | 103 | 12.866 | 29.263 | 17.235 | 0.00 | 0.00 |
| ATOM | 1625 | CG   | HIP | 103 | 12.114 | 29.618 | 19.146 | 0.00 | 0.00 |
| ATOM | 1626 | ND1  | HIP | 103 | 11.315 | 28.609 | 19.509 | 0.00 | 0.00 |
| ATOM | 1627 | HD1  | HIP | 103 | 11.376 | 27.705 | 19.165 | 0.00 | 0.00 |
| ATOM | 1628 | CE1  | HIP | 103 | 10.406 | 29.055 | 20.353 | 0.00 | 0.00 |
| ATOM | 1629 | HE1  | HIP | 103 | 9.637  | 28.499 | 20.791 | 0.00 | 0.00 |
| ATOM | 1630 | NE2  | HIP | 103 | 10.603 | 30.321 | 20.538 | 0.00 | 0.00 |
| ATOM | 1631 | HE2  | HIP | 103 | 10.057 | 30.899 | 21.101 | 0.00 | 0.00 |
| ATOM | 1632 | CD2  | HIP | 103 | 11.671 | 30.691 | 19.791 | 0.00 | 0.00 |
| ATOM | 1633 | HD2  | HIP | 103 | 12.077 | 31.643 | 19.717 | 0.00 | 0.00 |
| ATOM | 1634 | C    | HIP | 103 | 15.412 | 28.408 | 17.497 | 0.00 | 0.00 |
| ATOM | 1635 | O    | HIP | 103 | 15.070 | 28.249 | 16.372 | 0.00 | 0.00 |
| ATOM | 1636 | N    | LEU | 104 | 16.674 | 28.409 | 17.803 | 0.00 | 0.00 |
| ATOM | 1637 | H    | LEU | 104 | 16.874 | 28.508 | 18.740 | 0.00 | 0.00 |
| ATOM | 1638 | CA   | LEU | 104 | 17.794 | 28.148 | 16.903 | 0.00 | 0.00 |
| ATOM | 1639 | HA   | LEU | 104 | 17.416 | 27.629 | 16.043 | 0.00 | 0.00 |
| ATOM | 1640 | CB   | LEU | 104 | 18.373 | 29.466 | 16.389 | 0.00 | 0.00 |

|      |      |      |     |     |        |        |        |      |      |
|------|------|------|-----|-----|--------|--------|--------|------|------|
| ATOM | 1641 | HB2  | LEU | 104 | 19.085 | 29.247 | 15.627 | 0.00 | 0.00 |
| ATOM | 1642 | HB3  | LEU | 104 | 17.581 | 29.990 | 15.913 | 0.00 | 0.00 |
| ATOM | 1643 | CG   | LEU | 104 | 19.010 | 30.396 | 17.400 | 0.00 | 0.00 |
| ATOM | 1644 | HG   | LEU | 104 | 18.654 | 30.268 | 18.249 | 0.00 | 0.00 |
| ATOM | 1645 | CD1  | LEU | 104 | 20.332 | 30.287 | 17.524 | 0.00 | 0.00 |
| ATOM | 1646 | 1HD1 | LEU | 104 | 20.613 | 30.062 | 17.624 | 0.00 | 0.00 |
| ATOM | 1647 | 2HD1 | LEU | 104 | 20.649 | 30.282 | 17.345 | 0.00 | 0.00 |
| ATOM | 1648 | 3HD1 | LEU | 104 | 20.697 | 30.447 | 17.716 | 0.00 | 0.00 |
| ATOM | 1649 | CD2  | LEU | 104 | 18.838 | 31.705 | 17.145 | 0.00 | 0.00 |
| ATOM | 1650 | 1HD2 | LEU | 104 | 18.944 | 32.232 | 17.622 | 0.00 | 0.00 |
| ATOM | 1651 | 2HD2 | LEU | 104 | 19.158 | 32.022 | 16.696 | 0.00 | 0.00 |
| ATOM | 1652 | 3HD2 | LEU | 104 | 18.272 | 31.810 | 16.939 | 0.00 | 0.00 |
| ATOM | 1653 | C    | LEU | 104 | 18.842 | 27.234 | 17.526 | 0.00 | 0.00 |
| ATOM | 1654 | O    | LEU | 104 | 18.924 | 27.119 | 18.723 | 0.00 | 0.00 |
| ATOM | 1655 | N    | GLN | 105 | 19.654 | 26.601 | 16.708 | 0.00 | 0.00 |
| ATOM | 1656 | H    | GLN | 105 | 19.502 | 26.720 | 15.747 | 0.00 | 0.00 |
| ATOM | 1657 | CA   | GLN | 105 | 20.805 | 25.797 | 17.084 | 0.00 | 0.00 |
| ATOM | 1658 | HA   | GLN | 105 | 20.986 | 25.952 | 18.116 | 0.00 | 0.00 |
| ATOM | 1659 | CB   | GLN | 105 | 20.498 | 24.341 | 16.905 | 0.00 | 0.00 |
| ATOM | 1660 | HB2  | GLN | 105 | 20.634 | 24.041 | 16.891 | 0.00 | 0.00 |
| ATOM | 1661 | HB3  | GLN | 105 | 20.339 | 24.046 | 17.033 | 0.00 | 0.00 |
| ATOM | 1662 | CG   | GLN | 105 | 20.228 | 23.653 | 16.596 | 0.00 | 0.00 |
| ATOM | 1663 | HG2  | GLN | 105 | 20.109 | 23.904 | 16.619 | 0.00 | 0.00 |
| ATOM | 1664 | HG3  | GLN | 105 | 20.349 | 23.921 | 16.481 | 0.00 | 0.00 |
| ATOM | 1665 | CD   | GLN | 105 | 19.946 | 22.260 | 16.409 | 0.00 | 0.00 |
| ATOM | 1666 | OE1  | GLN | 105 | 19.896 | 21.666 | 16.491 | 0.00 | 0.00 |
| ATOM | 1667 | NE2  | GLN | 105 | 19.743 | 21.683 | 16.146 | 0.00 | 0.00 |
| ATOM | 1668 | 1HE2 | GLN | 105 | 19.550 | 20.783 | 16.015 | 0.00 | 0.00 |
| ATOM | 1669 | ZHE2 | GLN | 105 | 19.779 | 22.151 | 16.086 | 0.00 | 0.00 |
| ATOM | 1670 | C    | GLN | 105 | 22.040 | 26.209 | 16.305 | 0.00 | 0.00 |
| ATOM | 1671 | O    | GLN | 105 | 21.903 | 26.655 | 15.204 | 0.00 | 0.00 |
| ATOM | 1672 | N    | PRO | 106 | 23.241 | 26.065 | 16.819 | 0.00 | 0.00 |
| ATOM | 1673 | CD   | PRO | 106 | 23.533 | 25.674 | 18.131 | 0.00 | 0.00 |
| ATOM | 1674 | HD2  | PRO | 106 | 23.362 | 24.699 | 18.283 | 0.00 | 0.00 |
| ATOM | 1675 | HD3  | PRO | 106 | 23.000 | 26.205 | 18.811 | 0.00 | 0.00 |
| ATOM | 1676 | CG   | PRO | 106 | 24.925 | 25.940 | 18.305 | 0.00 | 0.00 |
| ATOM | 1677 | HG2  | PRO | 106 | 25.371 | 25.194 | 18.329 | 0.00 | 0.00 |
| ATOM | 1678 | HG3  | PRO | 106 | 25.043 | 26.378 | 19.041 | 0.00 | 0.00 |
| ATOM | 1679 | CB   | PRO | 106 | 25.435 | 26.673 | 17.280 | 0.00 | 0.00 |
| ATOM | 1680 | HB2  | PRO | 106 | 25.484 | 27.586 | 17.555 | 0.00 | 0.00 |
| ATOM | 1681 | HB3  | PRO | 106 | 26.335 | 26.371 | 17.094 | 0.00 | 0.00 |
| ATOM | 1682 | CA   | PRO | 106 | 24.452 | 26.502 | 16.179 | 0.00 | 0.00 |
| ATOM | 1683 | HA   | PRO | 106 | 24.273 | 27.452 | 15.751 | 0.00 | 0.00 |
| ATOM | 1684 | C    | PRO | 106 | 24.937 | 25.602 | 15.072 | 0.00 | 0.00 |
| ATOM | 1685 | O    | PRO | 106 | 26.006 | 25.188 | 15.063 | 0.00 | 0.00 |
| ATOM | 1686 | N    | THR | 107 | 24.160 | 25.306 | 14.122 | 0.00 | 0.00 |
| ATOM | 1687 | H    | THR | 107 | 23.279 | 25.666 | 14.181 | 0.00 | 0.00 |
| ATOM | 1688 | CA   | THR | 107 | 24.488 | 24.585 | 12.913 | 0.00 | 0.00 |
| ATOM | 1689 | HA   | THR | 107 | 25.527 | 24.361 | 12.915 | 0.00 | 0.00 |
| ATOM | 1690 | CB   | THR | 107 | 23.750 | 23.272 | 12.814 | 0.00 | 0.00 |
| ATOM | 1691 | HB   | THR | 107 | 23.989 | 22.812 | 11.912 | 0.00 | 0.00 |
| ATOM | 1692 | CG2  | THR | 107 | 24.077 | 22.339 | 13.895 | 0.00 | 0.00 |
| ATOM | 1693 | 1HG2 | THR | 107 | 24.090 | 22.086 | 14.164 | 0.00 | 0.00 |
| ATOM | 1694 | 2HG2 | THR | 107 | 24.202 | 22.071 | 14.113 | 0.00 | 0.00 |
| ATOM | 1695 | 3HG2 | THR | 107 | 24.182 | 22.165 | 14.187 | 0.00 | 0.00 |
| ATOM | 1696 | OG1  | THR | 107 | 22.418 | 23.451 | 12.856 | 0.00 | 0.00 |
| ATOM | 1697 | HG1  | THR | 107 | 22.008 | 22.936 | 12.540 | 0.00 | 0.00 |
| ATOM | 1698 | C    | THR | 107 | 24.218 | 25.422 | 11.697 | 0.00 | 0.00 |
| ATOM | 1699 | O    | THR | 107 | 23.341 | 26.239 | 11.698 | 0.00 | 0.00 |
| ATOM | 1700 | N    | ALA | 108 | 24.954 | 25.242 | 10.646 | 0.00 | 0.00 |
| ATOM | 1701 | H    | ALA | 108 | 25.629 | 24.543 | 10.689 | 0.00 | 0.00 |
| ATOM | 1702 | CA   | ALA | 108 | 24.942 | 26.097 | 9.490  | 0.00 | 0.00 |
| ATOM | 1703 | HA   | ALA | 108 | 25.198 | 27.063 | 9.808  | 0.00 | 0.00 |
| ATOM | 1704 | CB   | ALA | 108 | 25.998 | 25.647 | 8.563  | 0.00 | 0.00 |
| ATOM | 1705 | HB1  | ALA | 108 | 26.341 | 25.550 | 8.435  | 0.00 | 0.00 |
| ATOM | 1706 | HB2  | ALA | 108 | 26.201 | 25.434 | 8.309  | 0.00 | 0.00 |
| ATOM | 1707 | HB3  | ALA | 108 | 26.225 | 25.649 | 8.274  | 0.00 | 0.00 |
| ATOM | 1708 | C    | ALA | 108 | 23.610 | 26.200 | 8.789  | 0.00 | 0.00 |
| ATOM | 1709 | O    | ALA | 108 | 23.338 | 27.170 | 8.196  | 0.00 | 0.00 |
| ATOM | 1710 | N    | GLU | 109 | 22.763 | 25.231 | 8.878  | 0.00 | 0.00 |
| ATOM | 1711 | H    | GLU | 109 | 23.058 | 24.455 | 9.348  | 0.00 | 0.00 |
| ATOM | 1712 | CA   | GLU | 109 | 21.436 | 25.207 | 8.306  | 0.00 | 0.00 |
| ATOM | 1713 | HA   | GLU | 109 | 21.427 | 25.834 | 7.472  | 0.00 | 0.00 |
| ATOM | 1714 | CB   | GLU | 109 | 21.103 | 23.844 | 7.841  | 0.00 | 0.00 |
| ATOM | 1715 | HB2  | GLU | 109 | 21.174 | 23.197 | 8.627  | 0.00 | 0.00 |
| ATOM | 1716 | HB3  | GLU | 109 | 20.111 | 23.827 | 7.513  | 0.00 | 0.00 |
| ATOM | 1717 | CG   | GLU | 109 | 21.967 | 23.354 | 6.774  | 0.00 | 0.00 |
| ATOM | 1718 | HG2  | GLU | 109 | 22.556 | 23.660 | 6.745  | 0.00 | 0.00 |
| ATOM | 1719 | HG3  | GLU | 109 | 22.158 | 22.699 | 6.828  | 0.00 | 0.00 |
| ATOM | 1720 | CD   | GLU | 109 | 21.759 | 23.306 | 5.683  | 0.00 | 0.00 |
| ATOM | 1721 | OE1  | GLU | 109 | 21.600 | 23.271 | 5.286  | 0.00 | 0.00 |
| ATOM | 1722 | OE2  | GLU | 109 | 21.760 | 23.300 | 5.202  | 0.00 | 0.00 |
| ATOM | 1723 | C    | GLU | 109 | 20.358 | 25.736 | 9.203  | 0.00 | 0.00 |
| ATOM | 1724 | O    | GLU | 109 | 19.270 | 25.869 | 8.772  | 0.00 | 0.00 |
| ATOM | 1725 | N    | ASN | 110 | 20.629 | 26.058 | 10.435 | 0.00 | 0.00 |
| ATOM | 1726 | H    | ASN | 110 | 21.530 | 25.915 | 10.741 | 0.00 | 0.00 |
| ATOM | 1727 | CA   | ASN | 110 | 19.654 | 26.512 | 11.394 | 0.00 | 0.00 |
| ATOM | 1728 | HA   | ASN | 110 | 18.760 | 26.752 | 10.883 | 0.00 | 0.00 |
| ATOM | 1729 | CB   | ASN | 110 | 19.368 | 25.368 | 12.320 | 0.00 | 0.00 |
| ATOM | 1730 | HB2  | ASN | 110 | 19.251 | 24.484 | 11.758 | 0.00 | 0.00 |
| ATOM | 1731 | HB3  | ASN | 110 | 20.181 | 25.234 | 12.963 | 0.00 | 0.00 |
| ATOM | 1732 | CG   | ASN | 110 | 18.154 | 25.561 | 13.134 | 0.00 | 0.00 |
| ATOM | 1733 | OD1  | ASN | 110 | 18.019 | 26.071 | 14.009 | 0.00 | 0.00 |
| ATOM | 1734 | ND2  | ASN | 110 | 17.234 | 25.147 | 12.883 | 0.00 | 0.00 |
| ATOM | 1735 | 1HD2 | ASN | 110 | 16.444 | 25.278 | 13.413 | 0.00 | 0.00 |
| ATOM | 1736 | 2HD2 | ASN | 110 | 17.316 | 24.698 | 12.169 | 0.00 | 0.00 |
| ATOM | 1737 | C    | ASN | 110 | 20.035 | 27.771 | 12.146 | 0.00 | 0.00 |
| ATOM | 1738 | O    | ASN | 110 | 19.181 | 28.446 | 12.601 | 0.00 | 0.00 |
| ATOM | 1739 | N    | ALA | 111 | 21.284 | 28.123 | 12.248 | 0.00 | 0.00 |
| ATOM | 1740 | H    | ALA | 111 | 21.938 | 27.526 | 11.865 | 0.00 | 0.00 |
| ATOM | 1741 | CA   | ALA | 111 | 21.774 | 29.225 | 13.044 | 0.00 | 0.00 |
| ATOM | 1742 | HA   | ALA | 111 | 21.444 | 29.082 | 14.043 | 0.00 | 0.00 |
| ATOM | 1743 | CB   | ALA | 111 | 23.271 | 29.196 | 13.045 | 0.00 | 0.00 |
| ATOM | 1744 | HB1  | ALA | 111 | 23.583 | 28.994 | 12.722 | 0.00 | 0.00 |
| ATOM | 1745 | HB2  | ALA | 111 | 23.655 | 29.568 | 13.035 | 0.00 | 0.00 |

|      |      |      |     |     |        |        |        |      |      |
|------|------|------|-----|-----|--------|--------|--------|------|------|
| ATOM | 1746 | HB3  | ALA | 111 | 23.656 | 29.005 | 13.382 | 0.00 | 0.00 |
| ATOM | 1747 | C    | ALA | 111 | 21.278 | 30.589 | 12.609 | 0.00 | 0.00 |
| ATOM | 1748 | O    | ALA | 111 | 21.114 | 31.451 | 13.443 | 0.00 | 0.00 |
| ATOM | 1749 | N    | TYR | 112 | 20.992 | 30.780 | 11.337 | 0.00 | 0.00 |
| ATOM | 1750 | H    | TYR | 112 | 21.124 | 30.025 | 10.718 | 0.00 | 0.00 |
| ATOM | 1751 | CA   | TYR | 112 | 20.648 | 32.066 | 10.757 | 0.00 | 0.00 |
| ATOM | 1752 | HA   | TYR | 112 | 20.794 | 32.814 | 11.500 | 0.00 | 0.00 |
| ATOM | 1753 | CB   | TYR | 112 | 21.602 | 32.365 | 9.628  | 0.00 | 0.00 |
| ATOM | 1754 | HB2  | TYR | 112 | 21.318 | 31.779 | 8.795  | 0.00 | 0.00 |
| ATOM | 1755 | HB3  | TYR | 112 | 21.471 | 33.372 | 9.336  | 0.00 | 0.00 |
| ATOM | 1756 | CG   | TYR | 112 | 23.058 | 32.132 | 9.931  | 0.00 | 0.00 |
| ATOM | 1757 | CD1  | TYR | 112 | 23.716 | 32.884 | 10.865 | 0.00 | 0.00 |
| ATOM | 1758 | HD1  | TYR | 112 | 23.194 | 33.637 | 11.364 | 0.00 | 0.00 |
| ATOM | 1759 | CE1  | TYR | 112 | 25.054 | 32.651 | 11.156 | 0.00 | 0.00 |
| ATOM | 1760 | HE1  | TYR | 112 | 25.562 | 33.223 | 11.866 | 0.00 | 0.00 |
| ATOM | 1761 | CZ   | TYR | 112 | 25.735 | 31.654 | 10.517 | 0.00 | 0.00 |
| ATOM | 1762 | OH   | TYR | 112 | 27.021 | 31.429 | 10.790 | 0.00 | 0.00 |
| ATOM | 1763 | HH   | TYR | 112 | 27.355 | 30.732 | 10.295 | 0.00 | 0.00 |
| ATOM | 1764 | CE2  | TYR | 112 | 25.078 | 30.902 | 9.584  | 0.00 | 0.00 |
| ATOM | 1765 | HE2  | TYR | 112 | 25.595 | 30.143 | 9.101  | 0.00 | 0.00 |
| ATOM | 1766 | CD2  | TYR | 112 | 23.743 | 31.142 | 9.293  | 0.00 | 0.00 |
| ATOM | 1767 | HD2  | TYR | 112 | 23.243 | 30.565 | 8.581  | 0.00 | 0.00 |
| ATOM | 1768 | C    | TYR | 112 | 19.209 | 32.185 | 10.285 | 0.00 | 0.00 |
| ATOM | 1769 | O    | TYR | 112 | 18.722 | 33.276 | 10.141 | 0.00 | 0.00 |
| ATOM | 1770 | N    | GLU | 113 | 18.516 | 31.091 | 10.052 | 0.00 | 0.00 |
| ATOM | 1771 | H    | GLU | 113 | 18.977 | 30.235 | 10.187 | 0.00 | 0.00 |
| ATOM | 1772 | CA   | GLU | 113 | 17.217 | 31.065 | 9.398  | 0.00 | 0.00 |
| ATOM | 1773 | HA   | GLU | 113 | 17.314 | 31.597 | 8.476  | 0.00 | 0.00 |
| ATOM | 1774 | CB   | GLU | 113 | 16.887 | 29.632 | 9.070  | 0.00 | 0.00 |
| ATOM | 1775 | HB2  | GLU | 113 | 17.715 | 29.234 | 8.537  | 0.00 | 0.00 |
| ATOM | 1776 | HB3  | GLU | 113 | 16.771 | 29.073 | 9.960  | 0.00 | 0.00 |
| ATOM | 1777 | CG   | GLU | 113 | 15.676 | 29.453 | 8.218  | 0.00 | 0.00 |
| ATOM | 1778 | HG2  | GLU | 113 | 15.404 | 30.030 | 7.916  | 0.00 | 0.00 |
| ATOM | 1779 | HG3  | GLU | 113 | 15.832 | 29.061 | 7.682  | 0.00 | 0.00 |
| ATOM | 1780 | CD   | GLU | 113 | 14.643 | 28.970 | 8.475  | 0.00 | 0.00 |
| ATOM | 1781 | OE1  | GLU | 113 | 13.865 | 29.129 | 8.251  | 0.00 | 0.00 |
| ATOM | 1782 | OE2  | GLU | 113 | 14.559 | 28.401 | 8.870  | 0.00 | 0.00 |
| ATOM | 1783 | C    | GLU | 113 | 16.102 | 31.748 | 10.193 | 0.00 | 0.00 |
| ATOM | 1784 | O    | GLU | 113 | 15.412 | 32.572 | 9.671  | 0.00 | 0.00 |
| ATOM | 1785 | N    | TYR | 114 | 15.952 | 31.454 | 11.458 | 0.00 | 0.00 |
| ATOM | 1786 | H    | TYR | 114 | 16.566 | 30.792 | 11.834 | 0.00 | 0.00 |
| ATOM | 1787 | CA   | TYR | 114 | 14.981 | 32.096 | 12.346 | 0.00 | 0.00 |
| ATOM | 1788 | HA   | TYR | 114 | 14.026 | 32.136 | 11.844 | 0.00 | 0.00 |
| ATOM | 1789 | CB   | TYR | 114 | 14.821 | 31.242 | 13.597 | 0.00 | 0.00 |
| ATOM | 1790 | HB2  | TYR | 114 | 14.443 | 30.280 | 13.317 | 0.00 | 0.00 |
| ATOM | 1791 | HB3  | TYR | 114 | 15.784 | 31.073 | 14.035 | 0.00 | 0.00 |
| ATOM | 1792 | CG   | TYR | 114 | 13.921 | 31.805 | 14.663 | 0.00 | 0.00 |
| ATOM | 1793 | CD1  | TYR | 114 | 12.565 | 31.625 | 14.596 | 0.00 | 0.00 |
| ATOM | 1794 | HD1  | TYR | 114 | 12.167 | 31.084 | 13.785 | 0.00 | 0.00 |
| ATOM | 1795 | CE1  | TYR | 114 | 11.739 | 32.154 | 15.587 | 0.00 | 0.00 |
| ATOM | 1796 | HE1  | TYR | 114 | 10.701 | 32.024 | 15.528 | 0.00 | 0.00 |
| ATOM | 1797 | CZ   | TYR | 114 | 12.260 | 32.859 | 16.655 | 0.00 | 0.00 |
| ATOM | 1798 | OH   | TYR | 114 | 11.462 | 33.366 | 17.611 | 0.00 | 0.00 |
| ATOM | 1799 | HH   | TYR | 114 | 10.561 | 33.242 | 17.421 | 0.00 | 0.00 |
| ATOM | 1800 | CE2  | TYR | 114 | 13.624 | 33.031 | 16.727 | 0.00 | 0.00 |
| ATOM | 1801 | HE2  | TYR | 114 | 14.019 | 33.563 | 17.547 | 0.00 | 0.00 |
| ATOM | 1802 | CD2  | TYR | 114 | 14.449 | 32.502 | 15.734 | 0.00 | 0.00 |
| ATOM | 1803 | HD2  | TYR | 114 | 15.489 | 32.635 | 15.791 | 0.00 | 0.00 |
| ATOM | 1804 | C    | TYR | 114 | 15.383 | 33.535 | 12.683 | 0.00 | 0.00 |
| ATOM | 1805 | O    | TYR | 114 | 14.569 | 34.443 | 12.593 | 0.00 | 0.00 |
| ATOM | 1806 | N    | PHE | 115 | 16.657 | 33.761 | 12.990 | 0.00 | 0.00 |
| ATOM | 1807 | H    | PHE | 115 | 17.255 | 32.964 | 13.037 | 0.00 | 0.00 |
| ATOM | 1808 | CA   | PHE | 115 | 17.222 | 35.072 | 13.298 | 0.00 | 0.00 |
| ATOM | 1809 | HA   | PHE | 115 | 16.720 | 35.463 | 14.171 | 0.00 | 0.00 |
| ATOM | 1810 | CB   | PHE | 115 | 18.705 | 34.909 | 13.642 | 0.00 | 0.00 |
| ATOM | 1811 | HB2  | PHE | 115 | 18.789 | 34.218 | 14.448 | 0.00 | 0.00 |
| ATOM | 1812 | HB3  | PHE | 115 | 19.207 | 34.475 | 12.808 | 0.00 | 0.00 |
| ATOM | 1813 | CG   | PHE | 115 | 19.458 | 36.148 | 14.039 | 0.00 | 0.00 |
| ATOM | 1814 | CD1  | PHE | 115 | 20.304 | 36.658 | 13.468 | 0.00 | 0.00 |
| ATOM | 1815 | HD1  | PHE | 115 | 20.395 | 36.197 | 12.737 | 0.00 | 0.00 |
| ATOM | 1816 | CE1  | PHE | 115 | 21.034 | 37.768 | 13.841 | 0.00 | 0.00 |
| ATOM | 1817 | HE1  | PHE | 115 | 21.673 | 38.150 | 13.399 | 0.00 | 0.00 |
| ATOM | 1818 | CZ   | PHE | 115 | 20.931 | 38.378 | 14.795 | 0.00 | 0.00 |
| ATOM | 1819 | HZ   | PHE | 115 | 21.496 | 39.221 | 15.089 | 0.00 | 0.00 |
| ATOM | 1820 | CE2  | PHE | 115 | 20.089 | 37.878 | 15.365 | 0.00 | 0.00 |
| ATOM | 1821 | HE2  | PHE | 115 | 20.002 | 38.347 | 16.100 | 0.00 | 0.00 |
| ATOM | 1822 | CD2  | PHE | 115 | 19.359 | 36.766 | 14.995 | 0.00 | 0.00 |
| ATOM | 1823 | HD2  | PHE | 115 | 18.723 | 36.391 | 15.451 | 0.00 | 0.00 |
| ATOM | 1824 | C    | PHE | 115 | 17.004 | 36.065 | 12.156 | 0.00 | 0.00 |
| ATOM | 1825 | O    | PHE | 115 | 16.519 | 37.157 | 12.397 | 0.00 | 0.00 |
| ATOM | 1826 | N    | THR | 116 | 17.270 | 35.677 | 10.910 | 0.00 | 0.00 |
| ATOM | 1827 | H    | THR | 116 | 17.645 | 34.765 | 10.773 | 0.00 | 0.00 |
| ATOM | 1828 | CA   | THR | 116 | 17.090 | 36.535 | 9.729  | 0.00 | 0.00 |
| ATOM | 1829 | HA   | THR | 116 | 17.703 | 37.412 | 9.851  | 0.00 | 0.00 |
| ATOM | 1830 | CB   | THR | 116 | 17.515 | 35.823 | 8.446  | 0.00 | 0.00 |
| ATOM | 1831 | HB   | THR | 116 | 16.908 | 34.969 | 8.300  | 0.00 | 0.00 |
| ATOM | 1832 | CG2  | THR | 116 | 17.450 | 36.679 | 7.223  | 0.00 | 0.00 |
| ATOM | 1833 | 1HG2 | THR | 116 | 17.286 | 37.056 | 7.075  | 0.00 | 0.00 |
| ATOM | 1834 | 2HG2 | THR | 116 | 17.700 | 36.900 | 6.918  | 0.00 | 0.00 |
| ATOM | 1835 | 3HG2 | THR | 116 | 17.309 | 36.685 | 6.770  | 0.00 | 0.00 |
| ATOM | 1836 | OG1  | THR | 116 | 18.830 | 35.416 | 8.531  | 0.00 | 0.00 |
| ATOM | 1837 | HG1  | THR | 116 | 18.865 | 34.682 | 9.044  | 0.00 | 0.00 |
| ATOM | 1838 | C    | THR | 116 | 15.647 | 37.001 | 9.584  | 0.00 | 0.00 |
| ATOM | 1839 | O    | THR | 116 | 15.419 | 38.157 | 9.267  | 0.00 | 0.00 |
| ATOM | 1840 | N    | LYS | 117 | 14.674 | 36.140 | 9.859  | 0.00 | 0.00 |
| ATOM | 1841 | H    | LYS | 117 | 14.936 | 35.227 | 10.146 | 0.00 | 0.00 |
| ATOM | 1842 | CA   | LYS | 117 | 13.248 | 36.451 | 9.746  | 0.00 | 0.00 |
| ATOM | 1843 | HA   | LYS | 117 | 13.080 | 36.942 | 8.799  | 0.00 | 0.00 |
| ATOM | 1844 | CB   | LYS | 117 | 12.430 | 35.158 | 9.756  | 0.00 | 0.00 |
| ATOM | 1845 | HB2  | LYS | 117 | 12.685 | 34.564 | 10.608 | 0.00 | 0.00 |
| ATOM | 1846 | HB3  | LYS | 117 | 11.392 | 35.411 | 9.824  | 0.00 | 0.00 |
| ATOM | 1847 | CG   | LYS | 117 | 12.646 | 34.358 | 8.483  | 0.00 | 0.00 |
| ATOM | 1848 | HG2  | LYS | 117 | 12.374 | 34.941 | 7.674  | 0.00 | 0.00 |
| ATOM | 1849 | HG3  | LYS | 117 | 13.649 | 34.133 | 8.386  | 0.00 | 0.00 |
| ATOM | 1850 | CD   | LYS | 117 | 11.884 | 33.084 | 8.420  | 0.00 | 0.00 |

|      |      |      |     |     |        |        |        |      |      |
|------|------|------|-----|-----|--------|--------|--------|------|------|
| ATOM | 1851 | HD2  | LYS | 117 | 12.178 | 32.477 | 9.198  | 0.00 | 0.00 |
| ATOM | 1852 | HD3  | LYS | 117 | 10.884 | 33.289 | 8.541  | 0.00 | 0.00 |
| ATOM | 1853 | CE   | LYS | 117 | 12.072 | 32.355 | 7.127  | 0.00 | 0.00 |
| ATOM | 1854 | HE2  | LYS | 117 | 12.008 | 31.969 | 6.957  | 0.00 | 0.00 |
| ATOM | 1855 | HE3  | LYS | 117 | 11.931 | 32.356 | 6.712  | 0.00 | 0.00 |
| ATOM | 1856 | NZ   | LYS | 117 | 12.505 | 32.147 | 6.646  | 0.00 | 0.00 |
| ATOM | 1857 | HZ1  | LYS | 117 | 12.696 | 32.096 | 6.541  | 0.00 | 0.00 |
| ATOM | 1858 | HZ2  | LYS | 117 | 12.560 | 32.056 | 6.458  | 0.00 | 0.00 |
| ATOM | 1859 | HZ3  | LYS | 117 | 12.589 | 32.132 | 6.579  | 0.00 | 0.00 |
| ATOM | 1860 | C    | LYS | 117 | 12.797 | 37.443 | 10.810 | 0.00 | 0.00 |
| ATOM | 1861 | O    | LYS | 117 | 12.238 | 38.461 | 10.457 | 0.00 | 0.00 |
| ATOM | 1862 | N    | ILE | 118 | 13.097 | 37.225 | 12.081 | 0.00 | 0.00 |
| ATOM | 1863 | H    | ILE | 118 | 13.588 | 36.398 | 12.317 | 0.00 | 0.00 |
| ATOM | 1864 | CA   | ILE | 118 | 12.699 | 38.167 | 13.138 | 0.00 | 0.00 |
| ATOM | 1865 | HA   | ILE | 118 | 11.683 | 38.463 | 12.927 | 0.00 | 0.00 |
| ATOM | 1866 | CB   | ILE | 118 | 12.661 | 37.523 | 14.527 | 0.00 | 0.00 |
| ATOM | 1867 | HB   | ILE | 118 | 12.285 | 38.278 | 15.183 | 0.00 | 0.00 |
| ATOM | 1868 | CG2  | ILE | 118 | 11.669 | 36.373 | 14.552 | 0.00 | 0.00 |
| ATOM | 1869 | 1HG2 | ILE | 118 | 11.243 | 36.230 | 14.859 | 0.00 | 0.00 |
| ATOM | 1870 | 2HG2 | ILE | 118 | 11.303 | 36.187 | 14.221 | 0.00 | 0.00 |
| ATOM | 1871 | 3HG2 | ILE | 118 | 11.713 | 35.867 | 14.603 | 0.00 | 0.00 |
| ATOM | 1872 | CG1  | ILE | 118 | 14.013 | 37.087 | 15.060 | 0.00 | 0.00 |
| ATOM | 1873 | ZHG1 | ILE | 118 | 14.334 | 36.253 | 14.564 | 0.00 | 0.00 |
| ATOM | 1874 | 3HG1 | ILE | 118 | 14.695 | 37.830 | 14.904 | 0.00 | 0.00 |
| ATOM | 1875 | CD1  | ILE | 118 | 14.061 | 36.793 | 16.491 | 0.00 | 0.00 |
| ATOM | 1876 | 1HD1 | ILE | 118 | 14.150 | 36.766 | 16.835 | 0.00 | 0.00 |
| ATOM | 1877 | 2HD1 | ILE | 118 | 14.002 | 36.745 | 16.846 | 0.00 | 0.00 |
| ATOM | 1878 | 3HD1 | ILE | 118 | 14.087 | 36.648 | 16.825 | 0.00 | 0.00 |
| ATOM | 1879 | C    | ILE | 118 | 13.496 | 39.475 | 13.108 | 0.00 | 0.00 |
| ATOM | 1880 | O    | ILE | 118 | 12.946 | 40.520 | 13.393 | 0.00 | 0.00 |
| ATOM | 1881 | N    | ALA | 119 | 14.749 | 39.455 | 12.677 | 0.00 | 0.00 |
| ATOM | 1882 | H    | ALA | 119 | 15.177 | 38.576 | 12.496 | 0.00 | 0.00 |
| ATOM | 1883 | CA   | ALA | 119 | 15.553 | 40.653 | 12.482 | 0.00 | 0.00 |
| ATOM | 1884 | HA   | ALA | 119 | 15.430 | 41.288 | 13.343 | 0.00 | 0.00 |
| ATOM | 1885 | CB   | ALA | 119 | 17.019 | 40.265 | 12.416 | 0.00 | 0.00 |
| ATOM | 1886 | HB1  | ALA | 119 | 17.247 | 39.878 | 11.688 | 0.00 | 0.00 |
| ATOM | 1887 | HB2  | ALA | 119 | 17.575 | 40.927 | 12.488 | 0.00 | 0.00 |
| ATOM | 1888 | HB3  | ALA | 119 | 17.294 | 39.719 | 13.036 | 0.00 | 0.00 |
| ATOM | 1889 | C    | ALA | 119 | 15.118 | 41.473 | 11.262 | 0.00 | 0.00 |
| ATOM | 1890 | O    | ALA | 119 | 15.217 | 42.678 | 11.282 | 0.00 | 0.00 |
| ATOM | 1891 | N    | THR | 120 | 14.576 | 40.859 | 10.218 | 0.00 | 0.00 |
| ATOM | 1892 | H    | THR | 120 | 14.555 | 39.869 | 10.215 | 0.00 | 0.00 |
| ATOM | 1893 | CA   | THR | 120 | 13.960 | 41.587 | 9.098  | 0.00 | 0.00 |
| ATOM | 1894 | HA   | THR | 120 | 14.628 | 42.368 | 8.772  | 0.00 | 0.00 |
| ATOM | 1895 | CB   | THR | 120 | 13.715 | 40.664 | 7.902  | 0.00 | 0.00 |
| ATOM | 1896 | HB   | THR | 120 | 13.055 | 39.864 | 8.183  | 0.00 | 0.00 |
| ATOM | 1897 | CG2  | THR | 120 | 13.140 | 41.373 | 6.700  | 0.00 | 0.00 |
| ATOM | 1898 | 1HG2 | THR | 120 | 13.257 | 41.632 | 6.330  | 0.00 | 0.00 |
| ATOM | 1899 | 2HG2 | THR | 120 | 12.885 | 41.293 | 6.310  | 0.00 | 0.00 |
| ATOM | 1900 | 3HG2 | THR | 120 | 12.842 | 41.705 | 6.583  | 0.00 | 0.00 |
| ATOM | 1901 | OG1  | THR | 120 | 14.922 | 40.116 | 7.478  | 0.00 | 0.00 |
| ATOM | 1902 | HG1  | THR | 120 | 15.133 | 39.433 | 8.037  | 0.00 | 0.00 |
| ATOM | 1903 | C    | THR | 120 | 12.672 | 42.269 | 9.548  | 0.00 | 0.00 |
| ATOM | 1904 | O    | THR | 120 | 12.465 | 43.439 | 9.271  | 0.00 | 0.00 |
| ATOM | 1905 | N    | SER | 121 | 11.862 | 41.590 | 10.347 | 0.00 | 0.00 |
| ATOM | 1906 | H    | SER | 121 | 12.053 | 40.625 | 10.501 | 0.00 | 0.00 |
| ATOM | 1907 | CA   | SER | 121 | 10.650 | 42.135 | 10.954 | 0.00 | 0.00 |
| ATOM | 1908 | HA   | SER | 121 | 10.097 | 42.644 | 10.187 | 0.00 | 0.00 |
| ATOM | 1909 | CB   | SER | 121 | 9.776  | 41.012 | 11.464 | 0.00 | 0.00 |
| ATOM | 1910 | HB2  | SER | 121 | 10.311 | 40.416 | 12.146 | 0.00 | 0.00 |
| ATOM | 1911 | HB3  | SER | 121 | 8.925  | 41.414 | 11.963 | 0.00 | 0.00 |
| ATOM | 1912 | OG   | SER | 121 | 9.343  | 40.236 | 10.418 | 0.00 | 0.00 |
| ATOM | 1913 | HG   | SER | 121 | 8.974  | 40.459 | 10.190 | 0.00 | 0.00 |
| ATOM | 1914 | C    | SER | 121 | 10.888 | 43.165 | 12.055 | 0.00 | 0.00 |
| ATOM | 1915 | O    | SER | 121 | 9.969  | 43.826 | 12.464 | 0.00 | 0.00 |
| ATOM | 1916 | N    | LEU | 122 | 12.107 | 43.360 | 12.519 | 0.00 | 0.00 |
| ATOM | 1917 | H    | LEU | 122 | 12.799 | 42.732 | 12.229 | 0.00 | 0.00 |
| ATOM | 1918 | CA   | LEU | 122 | 12.492 | 44.464 | 13.406 | 0.00 | 0.00 |
| ATOM | 1919 | HA   | LEU | 122 | 11.745 | 44.555 | 14.183 | 0.00 | 0.00 |
| ATOM | 1920 | CB   | LEU | 122 | 13.828 | 44.084 | 14.064 | 0.00 | 0.00 |
| ATOM | 1921 | HB2  | LEU | 122 | 13.678 | 43.161 | 14.586 | 0.00 | 0.00 |
| ATOM | 1922 | HB3  | LEU | 122 | 14.545 | 43.910 | 13.291 | 0.00 | 0.00 |
| ATOM | 1923 | CG   | LEU | 122 | 14.459 | 45.086 | 15.027 | 0.00 | 0.00 |
| ATOM | 1924 | HG   | LEU | 122 | 14.751 | 45.967 | 14.488 | 0.00 | 0.00 |
| ATOM | 1925 | CD1  | LEU | 122 | 13.537 | 45.492 | 16.149 | 0.00 | 0.00 |
| ATOM | 1926 | 1HD1 | LEU | 122 | 13.403 | 45.284 | 16.622 | 0.00 | 0.00 |
| ATOM | 1927 | 2HD1 | LEU | 122 | 13.019 | 45.590 | 16.175 | 0.00 | 0.00 |
| ATOM | 1928 | 3HD1 | LEU | 122 | 13.510 | 45.926 | 16.471 | 0.00 | 0.00 |
| ATOM | 1929 | CD2  | LEU | 122 | 15.710 | 44.455 | 15.623 | 0.00 | 0.00 |
| ATOM | 1930 | 1HD2 | LEU | 122 | 16.080 | 44.352 | 15.676 | 0.00 | 0.00 |
| ATOM | 1931 | 2HD2 | LEU | 122 | 15.990 | 44.372 | 15.860 | 0.00 | 0.00 |
| ATOM | 1932 | 3HD2 | LEU | 122 | 15.983 | 44.202 | 15.768 | 0.00 | 0.00 |
| ATOM | 1933 | C    | LEU | 122 | 12.544 | 45.811 | 12.669 | 0.00 | 0.00 |
| ATOM | 1934 | O    | LEU | 122 | 12.254 | 46.832 | 13.259 | 0.00 | 0.00 |
| ATOM | 1935 | N    | PHE | 123 | 12.860 | 45.824 | 11.381 | 0.00 | 0.00 |
| ATOM | 1936 | H    | PHE | 123 | 13.080 | 44.952 | 10.958 | 0.00 | 0.00 |
| ATOM | 1937 | CA   | PHE | 123 | 13.061 | 47.036 | 10.589 | 0.00 | 0.00 |
| ATOM | 1938 | HA   | PHE | 123 | 12.975 | 47.895 | 11.239 | 0.00 | 0.00 |
| ATOM | 1939 | CB   | PHE | 123 | 14.488 | 47.057 | 10.053 | 0.00 | 0.00 |
| ATOM | 1940 | HB2  | PHE | 123 | 14.614 | 46.236 | 9.377  | 0.00 | 0.00 |
| ATOM | 1941 | HB3  | PHE | 123 | 14.644 | 47.956 | 9.493  | 0.00 | 0.00 |
| ATOM | 1942 | CG   | PHE | 123 | 15.545 | 46.995 | 11.126 | 0.00 | 0.00 |
| ATOM | 1943 | CD1  | PHE | 123 | 15.810 | 48.105 | 11.918 | 0.00 | 0.00 |
| ATOM | 1944 | HD1  | PHE | 123 | 15.273 | 49.002 | 11.757 | 0.00 | 0.00 |
| ATOM | 1945 | CE1  | PHE | 123 | 16.759 | 48.036 | 12.936 | 0.00 | 0.00 |
| ATOM | 1946 | HE1  | PHE | 123 | 16.968 | 48.881 | 13.541 | 0.00 | 0.00 |
| ATOM | 1947 | CZ   | PHE | 123 | 17.428 | 46.852 | 13.177 | 0.00 | 0.00 |
| ATOM | 1948 | HZ   | PHE | 123 | 18.135 | 46.784 | 13.968 | 0.00 | 0.00 |
| ATOM | 1949 | CE2  | PHE | 123 | 17.162 | 45.742 | 12.388 | 0.00 | 0.00 |
| ATOM | 1950 | HE2  | PHE | 123 | 17.661 | 44.830 | 12.578 | 0.00 | 0.00 |
| ATOM | 1951 | CD2  | PHE | 123 | 16.239 | 45.823 | 11.356 | 0.00 | 0.00 |
| ATOM | 1952 | HD2  | PHE | 123 | 16.046 | 44.971 | 10.755 | 0.00 | 0.00 |
| ATOM | 1953 | C    | PHE | 123 | 12.025 | 47.273 | 9.490  | 0.00 | 0.00 |
| ATOM | 1954 | O    | PHE | 123 | 12.062 | 48.300 | 8.847  | 0.00 | 0.00 |
| ATOM | 1955 | N    | GLU | 124 | 11.075 | 46.375 | 9.292  | 0.00 | 0.00 |

|      |      |      |     |     |        |        |        |      |      |
|------|------|------|-----|-----|--------|--------|--------|------|------|
| ATOM | 1956 | H    | GLU | 124 | 11.125 | 45.536 | 9.808  | 0.00 | 0.00 |
| ATOM | 1957 | CA   | GLU | 124 | 10.055 | 46.492 | 8.247  | 0.00 | 0.00 |
| ATOM | 1958 | HA   | GLU | 124 | 10.576 | 46.654 | 7.325  | 0.00 | 0.00 |
| ATOM | 1959 | CB   | GLU | 124 | 9.297  | 45.183 | 8.092  | 0.00 | 0.00 |
| ATOM | 1960 | HB2  | GLU | 124 | 8.750  | 45.227 | 7.190  | 0.00 | 0.00 |
| ATOM | 1961 | HB3  | GLU | 124 | 9.996  | 44.394 | 7.997  | 0.00 | 0.00 |
| ATOM | 1962 | CG   | GLU | 124 | 8.349  | 44.846 | 9.196  | 0.00 | 0.00 |
| ATOM | 1963 | HG2  | GLU | 124 | 7.680  | 45.636 | 9.310  | 0.00 | 0.00 |
| ATOM | 1964 | HG3  | GLU | 124 | 8.884  | 44.757 | 10.080 | 0.00 | 0.00 |
| ATOM | 1965 | CD   | GLU | 124 | 7.566  | 43.591 | 8.951  | 0.00 | 0.00 |
| ATOM | 1966 | OE1  | GLU | 124 | 6.903  | 43.380 | 8.734  | 0.00 | 0.00 |
| ATOM | 1967 | OE2  | GLU | 124 | 7.605  | 42.809 | 8.979  | 0.00 | 0.00 |
| ATOM | 1968 | C    | GLU | 124 | 9.099  | 47.682 | 8.400  | 0.00 | 0.00 |
| ATOM | 1969 | O    | GLU | 124 | 8.478  | 48.085 | 7.461  | 0.00 | 0.00 |
| ATOM | 1970 | N    | SER | 125 | 9.004  | 48.261 | 9.565  | 0.00 | 0.00 |
| ATOM | 1971 | H    | SER | 125 | 9.501  | 47.846 | 10.297 | 0.00 | 0.00 |
| ATOM | 1972 | CA   | SER | 125 | 8.206  | 49.442 | 9.881  | 0.00 | 0.00 |
| ATOM | 1973 | HA   | SER | 125 | 7.601  | 49.698 | 9.031  | 0.00 | 0.00 |
| ATOM | 1974 | CB   | SER | 125 | 7.253  | 49.115 | 11.006 | 0.00 | 0.00 |
| ATOM | 1975 | HB2  | SER | 125 | 6.658  | 49.969 | 11.224 | 0.00 | 0.00 |
| ATOM | 1976 | HB3  | SER | 125 | 6.612  | 48.334 | 10.692 | 0.00 | 0.00 |
| ATOM | 1977 | OG   | SER | 125 | 7.923  | 48.712 | 12.153 | 0.00 | 0.00 |
| ATOM | 1978 | HG   | SER | 125 | 7.335  | 48.526 | 12.729 | 0.00 | 0.00 |
| ATOM | 1979 | C    | SER | 125 | 9.034  | 50.678 | 10.186 | 0.00 | 0.00 |
| ATOM | 1980 | O    | SER | 125 | 8.534  | 51.643 | 10.556 | 0.00 | 0.00 |
| ATOM | 1981 | N    | GLY | 126 | 10.293 | 50.656 | 10.048 | 0.00 | 0.00 |
| ATOM | 1982 | H    | GLY | 126 | 10.645 | 49.844 | 9.724  | 0.00 | 0.00 |
| ATOM | 1983 | CA   | GLY | 126 | 11.203 | 51.750 | 10.300 | 0.00 | 0.00 |
| ATOM | 1984 | HA2  | GLY | 126 | 11.516 | 52.122 | 9.378  | 0.00 | 0.00 |
| ATOM | 1985 | HA3  | GLY | 126 | 10.708 | 52.519 | 10.798 | 0.00 | 0.00 |
| ATOM | 1986 | C    | GLY | 126 | 12.433 | 51.412 | 11.098 | 0.00 | 0.00 |
| ATOM | 1987 | O    | GLY | 126 | 12.527 | 50.360 | 11.691 | 0.00 | 0.00 |
| ATOM | 1988 | N    | ILE | 127 | 13.377 | 52.326 | 11.123 | 0.00 | 0.00 |
| ATOM | 1989 | H    | ILE | 127 | 13.207 | 53.169 | 10.644 | 0.00 | 0.00 |
| ATOM | 1990 | CA   | ILE | 127 | 14.664 | 52.218 | 11.811 | 0.00 | 0.00 |
| ATOM | 1991 | HA   | ILE | 127 | 14.636 | 51.331 | 12.427 | 0.00 | 0.00 |
| ATOM | 1992 | CB   | ILE | 127 | 15.801 | 52.010 | 10.800 | 0.00 | 0.00 |
| ATOM | 1993 | HB   | ILE | 127 | 15.559 | 51.124 | 10.243 | 0.00 | 0.00 |
| ATOM | 1994 | CG2  | ILE | 127 | 15.920 | 53.142 | 9.796  | 0.00 | 0.00 |
| ATOM | 1995 | 1HG2 | ILE | 127 | 16.042 | 53.389 | 9.505  | 0.00 | 0.00 |
| ATOM | 1996 | 2HG2 | ILE | 127 | 15.864 | 53.376 | 9.501  | 0.00 | 0.00 |
| ATOM | 1997 | 3HG2 | ILE | 127 | 15.945 | 53.485 | 9.620  | 0.00 | 0.00 |
| ATOM | 1998 | CG1  | ILE | 127 | 17.135 | 51.759 | 11.510 | 0.00 | 0.00 |
| ATOM | 1999 | 2HG1 | ILE | 127 | 17.509 | 52.651 | 11.909 | 0.00 | 0.00 |
| ATOM | 2000 | 3HG1 | ILE | 127 | 16.989 | 51.093 | 12.303 | 0.00 | 0.00 |
| ATOM | 2001 | CD1  | ILE | 127 | 18.194 | 51.169 | 10.644 | 0.00 | 0.00 |
| ATOM | 2002 | 1HD1 | ILE | 127 | 18.399 | 50.872 | 10.508 | 0.00 | 0.00 |
| ATOM | 2003 | 2HD1 | ILE | 127 | 18.383 | 51.093 | 10.283 | 0.00 | 0.00 |
| ATOM | 2004 | 3HD1 | ILE | 127 | 18.574 | 51.118 | 10.532 | 0.00 | 0.00 |
| ATOM | 2005 | C    | ILE | 127 | 14.898 | 53.394 | 12.752 | 0.00 | 0.00 |
| ATOM | 2006 | O    | ILE | 127 | 14.662 | 54.533 | 12.417 | 0.00 | 0.00 |
| ATOM | 2007 | N    | ASN | 128 | 15.390 | 53.100 | 13.941 | 0.00 | 0.00 |
| ATOM | 2008 | H    | ASN | 128 | 15.563 | 52.148 | 14.144 | 0.00 | 0.00 |
| ATOM | 2009 | CA   | ASN | 128 | 15.874 | 54.045 | 14.939 | 0.00 | 0.00 |
| ATOM | 2010 | HA   | ASN | 128 | 16.285 | 54.912 | 14.437 | 0.00 | 0.00 |
| ATOM | 2011 | CB   | ASN | 128 | 14.703 | 54.504 | 15.818 | 0.00 | 0.00 |
| ATOM | 2012 | HB2  | ASN | 128 | 15.037 | 55.278 | 16.489 | 0.00 | 0.00 |
| ATOM | 2013 | HB3  | ASN | 128 | 13.951 | 54.953 | 15.190 | 0.00 | 0.00 |
| ATOM | 2014 | CG   | ASN | 128 | 14.071 | 53.416 | 16.662 | 0.00 | 0.00 |
| ATOM | 2015 | OD1  | ASN | 128 | 14.679 | 52.744 | 17.420 | 0.00 | 0.00 |
| ATOM | 2016 | ND2  | ASN | 128 | 12.839 | 53.208 | 16.546 | 0.00 | 0.00 |
| ATOM | 2017 | 1HD2 | ASN | 128 | 12.370 | 52.544 | 17.116 | 0.00 | 0.00 |
| ATOM | 2018 | 2HD2 | ASN | 128 | 12.338 | 53.754 | 15.923 | 0.00 | 0.00 |
| ATOM | 2019 | C    | ASN | 128 | 17.019 | 53.406 | 15.744 | 0.00 | 0.00 |
| ATOM | 2020 | O    | ASN | 128 | 17.254 | 52.205 | 15.647 | 0.00 | 0.00 |
| ATOM | 2021 | N    | TRP | 129 | 17.719 | 54.197 | 16.547 | 0.00 | 0.00 |
| ATOM | 2022 | H    | TRP | 129 | 17.476 | 55.161 | 16.582 | 0.00 | 0.00 |
| ATOM | 2023 | CA   | TRP | 129 | 18.879 | 53.751 | 17.315 | 0.00 | 0.00 |
| ATOM | 2024 | HA   | TRP | 129 | 19.608 | 53.355 | 16.624 | 0.00 | 0.00 |
| ATOM | 2025 | CB   | TRP | 129 | 19.496 | 54.947 | 18.030 | 0.00 | 0.00 |
| ATOM | 2026 | HB2  | TRP | 129 | 19.798 | 55.679 | 17.307 | 0.00 | 0.00 |
| ATOM | 2027 | HB3  | TRP | 129 | 18.740 | 55.406 | 18.628 | 0.00 | 0.00 |
| ATOM | 2028 | CG   | TRP | 129 | 20.663 | 54.668 | 18.897 | 0.00 | 0.00 |
| ATOM | 2029 | CD1  | TRP | 129 | 20.786 | 55.070 | 20.146 | 0.00 | 0.00 |
| ATOM | 2030 | HD1  | TRP | 129 | 20.061 | 55.638 | 20.651 | 0.00 | 0.00 |
| ATOM | 2031 | HE1  | TRP | 129 | 21.970 | 54.657 | 20.663 | 0.00 | 0.00 |
| ATOM | 2032 | HE1  | TRP | 129 | 22.272 | 54.885 | 21.568 | 0.00 | 0.00 |
| ATOM | 2033 | CE2  | TRP | 129 | 22.679 | 53.949 | 19.773 | 0.00 | 0.00 |
| ATOM | 2034 | CZ2  | TRP | 129 | 23.911 | 53.346 | 19.832 | 0.00 | 0.00 |
| ATOM | 2035 | HZ2  | TRP | 129 | 24.472 | 53.365 | 20.722 | 0.00 | 0.00 |
| ATOM | 2036 | CH2  | TRP | 129 | 24.385 | 52.697 | 18.724 | 0.00 | 0.00 |
| ATOM | 2037 | HH2  | TRP | 129 | 25.318 | 52.215 | 18.754 | 0.00 | 0.00 |
| ATOM | 2038 | CZ3  | TRP | 129 | 23.631 | 52.674 | 17.578 | 0.00 | 0.00 |
| ATOM | 2039 | HZ3  | TRP | 129 | 24.004 | 52.186 | 16.734 | 0.00 | 0.00 |
| ATOM | 2040 | CE3  | TRP | 129 | 22.391 | 53.286 | 17.529 | 0.00 | 0.00 |
| ATOM | 2041 | HE3  | TRP | 129 | 21.825 | 53.254 | 16.640 | 0.00 | 0.00 |
| ATOM | 2042 | CD2  | TRP | 129 | 21.878 | 53.943 | 18.626 | 0.00 | 0.00 |
| ATOM | 2043 | C    | TRP | 129 | 18.555 | 52.624 | 18.302 | 0.00 | 0.00 |
| ATOM | 2044 | O    | TRP | 129 | 19.281 | 51.643 | 18.370 | 0.00 | 0.00 |
| ATOM | 2045 | N    | GLY | 130 | 17.427 | 52.693 | 19.002 | 0.00 | 0.00 |
| ATOM | 2046 | H    | GLY | 130 | 16.840 | 53.483 | 18.866 | 0.00 | 0.00 |
| ATOM | 2047 | CA   | GLY | 130 | 17.024 | 51.655 | 19.950 | 0.00 | 0.00 |
| ATOM | 2048 | HA2  | GLY | 130 | 17.805 | 51.531 | 20.677 | 0.00 | 0.00 |
| ATOM | 2049 | HA3  | GLY | 130 | 16.135 | 51.974 | 20.464 | 0.00 | 0.00 |
| ATOM | 2050 | C    | GLY | 130 | 16.749 | 50.296 | 19.307 | 0.00 | 0.00 |
| ATOM | 2051 | O    | GLY | 130 | 17.132 | 49.280 | 19.869 | 0.00 | 0.00 |
| ATOM | 2052 | N    | ARG | 131 | 16.198 | 50.255 | 18.093 | 0.00 | 0.00 |
| ATOM | 2053 | H    | ARG | 131 | 15.885 | 51.120 | 17.709 | 0.00 | 0.00 |
| ATOM | 2054 | CA   | ARG | 131 | 16.058 | 49.023 | 17.299 | 0.00 | 0.00 |
| ATOM | 2055 | HA   | ARG | 131 | 15.616 | 48.257 | 17.924 | 0.00 | 0.00 |
| ATOM | 2056 | CB   | ARG | 131 | 15.136 | 49.258 | 16.097 | 0.00 | 0.00 |
| ATOM | 2057 | HB2  | ARG | 131 | 15.489 | 50.107 | 15.538 | 0.00 | 0.00 |
| ATOM | 2058 | HB3  | ARG | 131 | 15.179 | 48.391 | 15.460 | 0.00 | 0.00 |
| ATOM | 2059 | CG   | ARG | 131 | 13.671 | 49.473 | 16.485 | 0.00 | 0.00 |
| ATOM | 2060 | HG2  | ARG | 131 | 13.311 | 48.617 | 17.013 | 0.00 | 0.00 |



|      |      |      |     |     |        |        |        |      |      |
|------|------|------|-----|-----|--------|--------|--------|------|------|
| ATOM | 2061 | HG3  | ARG | 131 | 13.579 | 50.320 | 17.132 | 0.00 | 0.00 |
| ATOM | 2062 | CD   | ARG | 131 | 12.809 | 49.696 | 15.257 | 0.00 | 0.00 |
| ATOM | 2063 | HD2  | ARG | 131 | 13.186 | 50.528 | 14.717 | 0.00 | 0.00 |
| ATOM | 2064 | HD3  | ARG | 131 | 12.874 | 48.834 | 14.641 | 0.00 | 0.00 |
| ATOM | 2065 | NE   | ARG | 131 | 11.421 | 49.952 | 15.609 | 0.00 | 0.00 |
| ATOM | 2066 | HE   | ARG | 131 | 11.249 | 50.342 | 16.505 | 0.00 | 0.00 |
| ATOM | 2067 | CZ   | ARG | 131 | 10.373 | 49.862 | 14.845 | 0.00 | 0.00 |
| ATOM | 2068 | NH1  | ARG | 131 | 10.416 | 49.486 | 13.624 | 0.00 | 0.00 |
| ATOM | 2069 | 1HH1 | ARG | 131 | 11.284 | 49.288 | 13.216 | 0.00 | 0.00 |
| ATOM | 2070 | 2HH1 | ARG | 131 | 9.586  | 49.435 | 13.094 | 0.00 | 0.00 |
| ATOM | 2071 | NH2  | ARG | 131 | 9.224  | 50.157 | 15.317 | 0.00 | 0.00 |
| ATOM | 2072 | 1HH2 | ARG | 131 | 9.164  | 50.457 | 16.259 | 0.00 | 0.00 |
| ATOM | 2073 | 2HH2 | ARG | 131 | 8.431  | 50.181 | 14.752 | 0.00 | 0.00 |
| ATOM | 2074 | C    | ARG | 131 | 17.413 | 48.446 | 16.865 | 0.00 | 0.00 |
| ATOM | 2075 | O    | ARG | 131 | 17.569 | 47.239 | 16.854 | 0.00 | 0.00 |
| ATOM | 2076 | N    | VAL | 132 | 18.410 | 49.278 | 16.576 | 0.00 | 0.00 |
| ATOM | 2077 | H    | VAL | 132 | 18.219 | 50.253 | 16.610 | 0.00 | 0.00 |
| ATOM | 2078 | CA   | VAL | 132 | 19.785 | 48.823 | 16.293 | 0.00 | 0.00 |
| ATOM | 2079 | HA   | VAL | 132 | 19.723 | 47.994 | 15.601 | 0.00 | 0.00 |
| ATOM | 2080 | CB   | VAL | 132 | 20.619 | 49.922 | 15.618 | 0.00 | 0.00 |
| ATOM | 2081 | HB   | VAL | 132 | 20.675 | 50.773 | 16.250 | 0.00 | 0.00 |
| ATOM | 2082 | CG1  | VAL | 132 | 22.030 | 49.479 | 15.324 | 0.00 | 0.00 |
| ATOM | 2083 | 1HG1 | VAL | 132 | 22.366 | 49.519 | 15.009 | 0.00 | 0.00 |
| ATOM | 2084 | 2HG1 | VAL | 132 | 22.478 | 49.505 | 15.491 | 0.00 | 0.00 |
| ATOM | 2085 | 3HG1 | VAL | 132 | 22.296 | 49.095 | 15.265 | 0.00 | 0.00 |
| ATOM | 2086 | CG2  | VAL | 132 | 20.008 | 50.361 | 14.305 | 0.00 | 0.00 |
| ATOM | 2087 | 1HG2 | VAL | 132 | 19.938 | 50.254 | 13.875 | 0.00 | 0.00 |
| ATOM | 2088 | 2HG2 | VAL | 132 | 19.624 | 50.490 | 14.090 | 0.00 | 0.00 |
| ATOM | 2089 | 3HG2 | VAL | 132 | 20.019 | 50.687 | 13.987 | 0.00 | 0.00 |
| ATOM | 2090 | C    | VAL | 132 | 20.460 | 48.274 | 17.551 | 0.00 | 0.00 |
| ATOM | 2091 | O    | VAL | 132 | 21.096 | 47.235 | 17.491 | 0.00 | 0.00 |
| ATOM | 2092 | N    | VAL | 133 | 20.261 | 48.892 | 18.714 | 0.00 | 0.00 |
| ATOM | 2093 | H    | VAL | 133 | 19.762 | 49.753 | 18.703 | 0.00 | 0.00 |
| ATOM | 2094 | CA   | VAL | 133 | 20.751 | 48.383 | 20.001 | 0.00 | 0.00 |
| ATOM | 2095 | HA   | VAL | 133 | 21.806 | 48.170 | 19.899 | 0.00 | 0.00 |
| ATOM | 2096 | CB   | VAL | 133 | 20.613 | 49.438 | 21.113 | 0.00 | 0.00 |
| ATOM | 2097 | HB   | VAL | 133 | 19.604 | 49.787 | 21.154 | 0.00 | 0.00 |
| ATOM | 2098 | CG1  | VAL | 133 | 20.976 | 48.913 | 22.478 | 0.00 | 0.00 |
| ATOM | 2099 | 1HG1 | VAL | 133 | 21.085 | 48.338 | 22.596 | 0.00 | 0.00 |
| ATOM | 2100 | 2HG1 | VAL | 133 | 21.461 | 49.078 | 22.854 | 0.00 | 0.00 |
| ATOM | 2101 | 3HG1 | VAL | 133 | 20.620 | 48.944 | 23.005 | 0.00 | 0.00 |
| ATOM | 2102 | CG2  | VAL | 133 | 21.526 | 50.622 | 20.853 | 0.00 | 0.00 |
| ATOM | 2103 | 1HG2 | VAL | 133 | 21.726 | 50.917 | 20.757 | 0.00 | 0.00 |
| ATOM | 2104 | 2HG2 | VAL | 133 | 21.728 | 50.931 | 20.823 | 0.00 | 0.00 |
| ATOM | 2105 | 3HG2 | VAL | 133 | 21.785 | 50.887 | 20.796 | 0.00 | 0.00 |
| ATOM | 2106 | C    | VAL | 133 | 20.082 | 47.055 | 20.381 | 0.00 | 0.00 |
| ATOM | 2107 | O    | VAL | 133 | 20.758 | 46.164 | 20.864 | 0.00 | 0.00 |
| ATOM | 2108 | N    | ALA | 134 | 18.798 | 46.858 | 20.084 | 0.00 | 0.00 |
| ATOM | 2109 | H    | ALA | 134 | 18.264 | 47.628 | 19.740 | 0.00 | 0.00 |
| ATOM | 2110 | CA   | ALA | 134 | 18.116 | 45.582 | 20.296 | 0.00 | 0.00 |
| ATOM | 2111 | HA   | ALA | 134 | 18.268 | 45.293 | 21.323 | 0.00 | 0.00 |
| ATOM | 2112 | CB   | ALA | 134 | 16.622 | 45.772 | 20.084 | 0.00 | 0.00 |
| ATOM | 2113 | HB1  | ALA | 134 | 16.235 | 45.968 | 20.338 | 0.00 | 0.00 |
| ATOM | 2114 | HB2  | ALA | 134 | 16.324 | 45.991 | 19.762 | 0.00 | 0.00 |
| ATOM | 2115 | HB3  | ALA | 134 | 16.222 | 45.479 | 20.016 | 0.00 | 0.00 |
| ATOM | 2116 | C    | ALA | 134 | 18.697 | 44.448 | 19.429 | 0.00 | 0.00 |
| ATOM | 2117 | O    | ALA | 134 | 18.886 | 43.346 | 19.921 | 0.00 | 0.00 |
| ATOM | 2118 | N    | LEU | 135 | 19.059 | 44.725 | 18.176 | 0.00 | 0.00 |
| ATOM | 2119 | H    | LEU | 135 | 18.861 | 45.634 | 17.823 | 0.00 | 0.00 |
| ATOM | 2120 | CA   | LEU | 135 | 19.753 | 43.778 | 17.297 | 0.00 | 0.00 |
| ATOM | 2121 | HA   | LEU | 135 | 19.171 | 42.869 | 17.268 | 0.00 | 0.00 |
| ATOM | 2122 | CB   | LEU | 135 | 19.827 | 44.356 | 15.875 | 0.00 | 0.00 |
| ATOM | 2123 | HB2  | LEU | 135 | 18.838 | 44.564 | 15.535 | 0.00 | 0.00 |
| ATOM | 2124 | HB3  | LEU | 135 | 20.337 | 45.290 | 15.913 | 0.00 | 0.00 |
| ATOM | 2125 | CG   | LEU | 135 | 20.524 | 43.471 | 14.851 | 0.00 | 0.00 |
| ATOM | 2126 | HG   | LEU | 135 | 21.484 | 43.211 | 15.207 | 0.00 | 0.00 |
| ATOM | 2127 | CD1  | LEU | 135 | 19.768 | 42.219 | 14.586 | 0.00 | 0.00 |
| ATOM | 2128 | 1HD1 | LEU | 135 | 19.509 | 42.015 | 14.256 | 0.00 | 0.00 |
| ATOM | 2129 | 2HD1 | LEU | 135 | 19.836 | 41.753 | 14.550 | 0.00 | 0.00 |
| ATOM | 2130 | 3HD1 | LEU | 135 | 19.432 | 41.959 | 14.756 | 0.00 | 0.00 |
| ATOM | 2131 | CD2  | LEU | 135 | 20.705 | 44.195 | 13.553 | 0.00 | 0.00 |
| ATOM | 2132 | 1HD2 | LEU | 135 | 20.766 | 44.428 | 13.286 | 0.00 | 0.00 |
| ATOM | 2133 | 2HD2 | LEU | 135 | 20.821 | 44.325 | 13.223 | 0.00 | 0.00 |
| ATOM | 2134 | 3HD2 | LEU | 135 | 20.694 | 44.356 | 13.203 | 0.00 | 0.00 |
| ATOM | 2135 | C    | LEU | 135 | 21.145 | 43.418 | 17.831 | 0.00 | 0.00 |
| ATOM | 2136 | O    | LEU | 135 | 21.516 | 42.254 | 17.836 | 0.00 | 0.00 |
| ATOM | 2137 | N    | LEU | 136 | 21.903 | 44.392 | 18.318 | 0.00 | 0.00 |
| ATOM | 2138 | H    | LEU | 136 | 21.540 | 45.319 | 18.283 | 0.00 | 0.00 |
| ATOM | 2139 | CA   | LEU | 136 | 23.224 | 44.181 | 18.916 | 0.00 | 0.00 |
| ATOM | 2140 | HA   | LEU | 136 | 23.792 | 43.529 | 18.270 | 0.00 | 0.00 |
| ATOM | 2141 | CB   | LEU | 136 | 23.951 | 45.520 | 19.023 | 0.00 | 0.00 |
| ATOM | 2142 | HB2  | LEU | 136 | 23.308 | 46.220 | 19.510 | 0.00 | 0.00 |
| ATOM | 2143 | HB3  | LEU | 136 | 24.811 | 45.399 | 19.647 | 0.00 | 0.00 |
| ATOM | 2144 | CG   | LEU | 136 | 24.393 | 46.106 | 17.688 | 0.00 | 0.00 |
| ATOM | 2145 | HG   | LEU | 136 | 23.589 | 46.079 | 17.003 | 0.00 | 0.00 |
| ATOM | 2146 | CD1  | LEU | 136 | 24.804 | 47.532 | 17.837 | 0.00 | 0.00 |
| ATOM | 2147 | 1HD1 | LEU | 136 | 25.241 | 47.765 | 17.991 | 0.00 | 0.00 |
| ATOM | 2148 | 2HD1 | LEU | 136 | 24.624 | 47.926 | 18.122 | 0.00 | 0.00 |
| ATOM | 2149 | 3HD1 | LEU | 136 | 24.844 | 47.935 | 17.503 | 0.00 | 0.00 |
| ATOM | 2150 | CD2  | LEU | 136 | 25.530 | 45.351 | 17.096 | 0.00 | 0.00 |
| ATOM | 2151 | 1HD2 | LEU | 136 | 25.715 | 44.982 | 17.007 | 0.00 | 0.00 |
| ATOM | 2152 | 2HD2 | LEU | 136 | 25.767 | 45.241 | 16.744 | 0.00 | 0.00 |
| ATOM | 2153 | 3HD2 | LEU | 136 | 25.933 | 45.284 | 17.085 | 0.00 | 0.00 |
| ATOM | 2154 | C    | LEU | 136 | 23.148 | 43.464 | 20.267 | 0.00 | 0.00 |
| ATOM | 2155 | O    | LEU | 136 | 24.055 | 42.716 | 20.596 | 0.00 | 0.00 |
| ATOM | 2156 | N    | GLY | 137 | 22.074 | 43.633 | 21.028 | 0.00 | 0.00 |
| ATOM | 2157 | H    | GLY | 137 | 21.418 | 44.323 | 20.742 | 0.00 | 0.00 |
| ATOM | 2158 | CA   | GLY | 137 | 21.806 | 42.902 | 22.260 | 0.00 | 0.00 |
| ATOM | 2159 | HA2  | GLY | 137 | 22.657 | 42.982 | 22.911 | 0.00 | 0.00 |
| ATOM | 2160 | HA3  | GLY | 137 | 20.958 | 43.351 | 22.745 | 0.00 | 0.00 |
| ATOM | 2161 | C    | GLY | 137 | 21.504 | 41.433 | 22.018 | 0.00 | 0.00 |
| ATOM | 2162 | O    | GLY | 137 | 22.109 | 40.577 | 22.642 | 0.00 | 0.00 |
| ATOM | 2163 | N    | PHE | 138 | 20.640 | 41.127 | 21.056 | 0.00 | 0.00 |
| ATOM | 2164 | H    | PHE | 138 | 20.141 | 41.870 | 20.622 | 0.00 | 0.00 |
| ATOM | 2165 | CA   | PHE | 138 | 20.381 | 39.769 | 20.594 | 0.00 | 0.00 |

|      |      |      |     |     |        |        |        |      |      |
|------|------|------|-----|-----|--------|--------|--------|------|------|
| ATOM | 2166 | HA   | PHE | 138 | 20.076 | 39.170 | 21.440 | 0.00 | 0.00 |
| ATOM | 2167 | CB   | PHE | 138 | 19.231 | 39.805 | 19.587 | 0.00 | 0.00 |
| ATOM | 2168 | HB2  | PHE | 138 | 18.415 | 40.339 | 20.022 | 0.00 | 0.00 |
| ATOM | 2169 | HB3  | PHE | 138 | 19.547 | 40.359 | 18.730 | 0.00 | 0.00 |
| ATOM | 2170 | CG   | PHE | 138 | 18.695 | 38.485 | 19.116 | 0.00 | 0.00 |
| ATOM | 2171 | CD1  | PHE | 138 | 17.961 | 37.772 | 19.592 | 0.00 | 0.00 |
| ATOM | 2172 | HD1  | PHE | 138 | 17.784 | 38.148 | 20.296 | 0.00 | 0.00 |
| ATOM | 2173 | CE1  | PHE | 138 | 17.442 | 36.576 | 19.137 | 0.00 | 0.00 |
| ATOM | 2174 | HE1  | PHE | 138 | 16.877 | 36.039 | 19.492 | 0.00 | 0.00 |
| ATOM | 2175 | CZ   | PHE | 138 | 17.658 | 36.080 | 18.222 | 0.00 | 0.00 |
| ATOM | 2176 | HZ   | PHE | 138 | 17.267 | 35.165 | 17.873 | 0.00 | 0.00 |
| ATOM | 2177 | CE2  | PHE | 138 | 18.388 | 36.786 | 17.754 | 0.00 | 0.00 |
| ATOM | 2178 | HE2  | PHE | 138 | 18.552 | 36.411 | 17.053 | 0.00 | 0.00 |
| ATOM | 2179 | CD2  | PHE | 138 | 18.900 | 37.988 | 18.195 | 0.00 | 0.00 |
| ATOM | 2180 | HD2  | PHE | 138 | 19.446 | 38.527 | 17.819 | 0.00 | 0.00 |
| ATOM | 2181 | C    | PHE | 138 | 21.640 | 39.133 | 19.997 | 0.00 | 0.00 |
| ATOM | 2182 | O    | PHE | 138 | 21.974 | 38.005 | 20.312 | 0.00 | 0.00 |
| ATOM | 2183 | N    | GLY | 139 | 22.394 | 39.887 | 19.206 | 0.00 | 0.00 |
| ATOM | 2184 | H    | GLY | 139 | 22.036 | 40.781 | 18.957 | 0.00 | 0.00 |
| ATOM | 2185 | CA   | GLY | 139 | 23.655 | 39.478 | 18.603 | 0.00 | 0.00 |
| ATOM | 2186 | HA2  | GLY | 139 | 23.481 | 38.640 | 17.957 | 0.00 | 0.00 |
| ATOM | 2187 | HA3  | GLY | 139 | 24.020 | 40.282 | 17.995 | 0.00 | 0.00 |
| ATOM | 2188 | C    | GLY | 139 | 24.742 | 39.109 | 19.602 | 0.00 | 0.00 |
| ATOM | 2189 | O    | GLY | 139 | 25.416 | 38.116 | 19.404 | 0.00 | 0.00 |
| ATOM | 2190 | N    | TYR | 140 | 24.873 | 39.841 | 20.714 | 0.00 | 0.00 |
| ATOM | 2191 | H    | TYR | 140 | 24.309 | 40.654 | 20.815 | 0.00 | 0.00 |
| ATOM | 2192 | CA   | TYR | 140 | 25.791 | 39.479 | 21.797 | 0.00 | 0.00 |
| ATOM | 2193 | HA   | TYR | 140 | 26.782 | 39.374 | 21.379 | 0.00 | 0.00 |
| ATOM | 2194 | CB   | TYR | 140 | 25.848 | 40.565 | 22.875 | 0.00 | 0.00 |
| ATOM | 2195 | HB2  | TYR | 140 | 26.316 | 41.435 | 22.450 | 0.00 | 0.00 |
| ATOM | 2196 | HB3  | TYR | 140 | 24.845 | 40.828 | 23.161 | 0.00 | 0.00 |
| ATOM | 2197 | CG   | TYR | 140 | 26.634 | 40.172 | 24.115 | 0.00 | 0.00 |
| ATOM | 2198 | CD1  | TYR | 140 | 27.954 | 39.727 | 24.004 | 0.00 | 0.00 |
| ATOM | 2199 | HD1  | TYR | 140 | 28.421 | 39.693 | 23.046 | 0.00 | 0.00 |
| ATOM | 2200 | CE1  | TYR | 140 | 28.656 | 39.289 | 25.133 | 0.00 | 0.00 |
| ATOM | 2201 | HE1  | TYR | 140 | 29.658 | 38.934 | 25.046 | 0.00 | 0.00 |
| ATOM | 2202 | CZ   | TYR | 140 | 28.047 | 39.309 | 26.388 | 0.00 | 0.00 |
| ATOM | 2203 | OH   | TYR | 140 | 28.737 | 38.901 | 27.471 | 0.00 | 0.00 |
| ATOM | 2204 | HH   | TYR | 140 | 28.219 | 38.900 | 28.261 | 0.00 | 0.00 |
| ATOM | 2205 | CE2  | TYR | 140 | 26.738 | 39.780 | 26.511 | 0.00 | 0.00 |
| ATOM | 2206 | HE2  | TYR | 140 | 26.292 | 39.828 | 27.478 | 0.00 | 0.00 |
| ATOM | 2207 | CD2  | TYR | 140 | 26.032 | 40.198 | 25.375 | 0.00 | 0.00 |
| ATOM | 2208 | HD2  | TYR | 140 | 25.027 | 40.541 | 25.472 | 0.00 | 0.00 |
| ATOM | 2209 | C    | TYR | 140 | 25.435 | 38.135 | 22.422 | 0.00 | 0.00 |
| ATOM | 2210 | O    | TYR | 140 | 26.303 | 37.296 | 22.578 | 0.00 | 0.00 |
| ATOM | 2211 | N    | ARG | 141 | 24.169 | 37.885 | 22.744 | 0.00 | 0.00 |
| ATOM | 2212 | H    | ARG | 141 | 23.495 | 38.591 | 22.557 | 0.00 | 0.00 |
| ATOM | 2213 | CA   | ARG | 141 | 23.742 | 36.634 | 23.377 | 0.00 | 0.00 |
| ATOM | 2214 | HA   | ARG | 141 | 24.441 | 36.407 | 24.172 | 0.00 | 0.00 |
| ATOM | 2215 | CB   | ARG | 141 | 22.355 | 36.801 | 24.003 | 0.00 | 0.00 |
| ATOM | 2216 | HB2  | ARG | 141 | 21.667 | 37.130 | 23.241 | 0.00 | 0.00 |
| ATOM | 2217 | HB3  | ARG | 141 | 22.020 | 35.842 | 24.362 | 0.00 | 0.00 |
| ATOM | 2218 | CG   | ARG | 141 | 22.295 | 37.792 | 25.167 | 0.00 | 0.00 |
| ATOM | 2219 | HG2  | ARG | 141 | 22.630 | 38.744 | 24.841 | 0.00 | 0.00 |
| ATOM | 2220 | HG3  | ARG | 141 | 21.280 | 37.904 | 25.472 | 0.00 | 0.00 |
| ATOM | 2221 | CD   | ARG | 141 | 23.105 | 37.369 | 26.372 | 0.00 | 0.00 |
| ATOM | 2222 | HD2  | ARG | 141 | 22.764 | 36.430 | 26.691 | 0.00 | 0.00 |
| ATOM | 2223 | HD3  | ARG | 141 | 24.117 | 37.283 | 26.094 | 0.00 | 0.00 |
| ATOM | 2224 | NE   | ARG | 141 | 23.009 | 38.314 | 27.473 | 0.00 | 0.00 |
| ATOM | 2225 | HE   | ARG | 141 | 22.241 | 38.948 | 27.472 | 0.00 | 0.00 |
| ATOM | 2226 | CZ   | ARG | 141 | 23.846 | 38.470 | 28.460 | 0.00 | 0.00 |
| ATOM | 2227 | NH1  | ARG | 141 | 24.866 | 37.729 | 28.646 | 0.00 | 0.00 |
| ATOM | 2228 | 1HH1 | ARG | 141 | 24.971 | 36.928 | 28.119 | 0.00 | 0.00 |
| ATOM | 2229 | 2HH1 | ARG | 141 | 25.531 | 37.994 | 29.337 | 0.00 | 0.00 |
| ATOM | 2230 | NH2  | ARG | 141 | 23.688 | 39.394 | 29.312 | 0.00 | 0.00 |
| ATOM | 2231 | 1HH2 | ARG | 141 | 22.875 | 39.936 | 29.259 | 0.00 | 0.00 |
| ATOM | 2232 | 2HH2 | ARG | 141 | 24.344 | 39.478 | 30.052 | 0.00 | 0.00 |
| ATOM | 2233 | C    | ARG | 141 | 23.845 | 35.430 | 22.444 | 0.00 | 0.00 |
| ATOM | 2234 | O    | ARG | 141 | 24.205 | 34.361 | 22.896 | 0.00 | 0.00 |
| ATOM | 2235 | N    | LEU | 142 | 23.649 | 35.599 | 21.144 | 0.00 | 0.00 |
| ATOM | 2236 | H    | LEU | 142 | 23.306 | 36.483 | 20.847 | 0.00 | 0.00 |
| ATOM | 2237 | CA   | LEU | 142 | 23.954 | 34.581 | 20.133 | 0.00 | 0.00 |
| ATOM | 2238 | HA   | LEU | 142 | 23.452 | 33.670 | 20.422 | 0.00 | 0.00 |
| ATOM | 2239 | CB   | LEU | 142 | 23.392 | 35.036 | 18.782 | 0.00 | 0.00 |
| ATOM | 2240 | HB2  | LEU | 142 | 22.338 | 35.189 | 18.887 | 0.00 | 0.00 |
| ATOM | 2241 | HB3  | LEU | 142 | 23.818 | 35.983 | 18.534 | 0.00 | 0.00 |
| ATOM | 2242 | CG   | LEU | 142 | 23.636 | 34.091 | 17.610 | 0.00 | 0.00 |
| ATOM | 2243 | HG   | LEU | 142 | 24.678 | 33.948 | 17.481 | 0.00 | 0.00 |
| ATOM | 2244 | CD1  | LEU | 142 | 23.011 | 32.759 | 17.809 | 0.00 | 0.00 |
| ATOM | 2245 | 1HD1 | LEU | 142 | 22.760 | 32.466 | 17.804 | 0.00 | 0.00 |
| ATOM | 2246 | 2HD1 | LEU | 142 | 22.947 | 32.379 | 17.786 | 0.00 | 0.00 |
| ATOM | 2247 | 3HD1 | LEU | 142 | 22.887 | 32.448 | 17.964 | 0.00 | 0.00 |
| ATOM | 2248 | CD2  | LEU | 142 | 23.102 | 34.675 | 16.342 | 0.00 | 0.00 |
| ATOM | 2249 | 1HD2 | LEU | 142 | 22.810 | 34.768 | 16.071 | 0.00 | 0.00 |
| ATOM | 2250 | 2HD2 | LEU | 142 | 23.037 | 34.984 | 16.066 | 0.00 | 0.00 |
| ATOM | 2251 | 3HD2 | LEU | 142 | 23.088 | 34.689 | 15.946 | 0.00 | 0.00 |
| ATOM | 2252 | C    | LEU | 142 | 25.461 | 34.286 | 20.060 | 0.00 | 0.00 |
| ATOM | 2253 | O    | LEU | 142 | 25.864 | 33.138 | 20.123 | 0.00 | 0.00 |
| ATOM | 2254 | N    | ALA | 143 | 26.299 | 35.311 | 19.986 | 0.00 | 0.00 |
| ATOM | 2255 | H    | ALA | 143 | 25.918 | 36.230 | 19.941 | 0.00 | 0.00 |
| ATOM | 2256 | CA   | ALA | 143 | 27.751 | 35.170 | 19.939 | 0.00 | 0.00 |
| ATOM | 2257 | HA   | ALA | 143 | 28.007 | 34.515 | 19.118 | 0.00 | 0.00 |
| ATOM | 2258 | CB   | ALA | 143 | 28.356 | 36.539 | 19.660 | 0.00 | 0.00 |
| ATOM | 2259 | HB1  | ALA | 143 | 28.454 | 36.987 | 19.993 | 0.00 | 0.00 |
| ATOM | 2260 | HB2  | ALA | 143 | 28.859 | 36.673 | 19.474 | 0.00 | 0.00 |
| ATOM | 2261 | HB3  | ALA | 143 | 28.203 | 36.945 | 19.311 | 0.00 | 0.00 |
| ATOM | 2262 | C    | ALA | 143 | 28.326 | 34.537 | 21.214 | 0.00 | 0.00 |
| ATOM | 2263 | O    | ALA | 143 | 29.183 | 33.671 | 21.138 | 0.00 | 0.00 |
| ATOM | 2264 | N    | LEU | 144 | 27.814 | 34.905 | 22.382 | 0.00 | 0.00 |
| ATOM | 2265 | H    | LEU | 144 | 27.159 | 35.654 | 22.382 | 0.00 | 0.00 |
| ATOM | 2266 | CA   | LEU | 144 | 28.225 | 34.371 | 23.667 | 0.00 | 0.00 |
| ATOM | 2267 | HA   | LEU | 144 | 29.293 | 34.487 | 23.740 | 0.00 | 0.00 |
| ATOM | 2268 | CB   | LEU | 144 | 27.580 | 35.184 | 24.789 | 0.00 | 0.00 |
| ATOM | 2269 | HB2  | LEU | 144 | 27.792 | 36.223 | 24.636 | 0.00 | 0.00 |
| ATOM | 2270 | HB3  | LEU | 144 | 26.520 | 35.063 | 24.726 | 0.00 | 0.00 |

|      |      |      |     |     |        |        |        |      |      |
|------|------|------|-----|-----|--------|--------|--------|------|------|
| ATOM | 2271 | CG   | LEU | 144 | 28.023 | 34.812 | 26.196 | 0.00 | 0.00 |
| ATOM | 2272 | HG   | LEU | 144 | 27.857 | 33.768 | 26.353 | 0.00 | 0.00 |
| ATOM | 2273 | CD1  | LEU | 144 | 29.474 | 35.108 | 26.452 | 0.00 | 0.00 |
| ATOM | 2274 | 1HD1 | LEU | 144 | 29.855 | 34.902 | 26.716 | 0.00 | 0.00 |
| ATOM | 2275 | 2HD1 | LEU | 144 | 29.860 | 35.142 | 26.195 | 0.00 | 0.00 |
| ATOM | 2276 | 3HD1 | LEU | 144 | 29.763 | 35.472 | 26.651 | 0.00 | 0.00 |
| ATOM | 2277 | CD2  | LEU | 144 | 27.194 | 35.561 | 27.208 | 0.00 | 0.00 |
| ATOM | 2278 | 1HD2 | LEU | 144 | 26.758 | 35.519 | 27.402 | 0.00 | 0.00 |
| ATOM | 2279 | 2HD2 | LEU | 144 | 27.019 | 36.007 | 27.275 | 0.00 | 0.00 |
| ATOM | 2280 | 3HD2 | LEU | 144 | 27.209 | 35.685 | 27.691 | 0.00 | 0.00 |
| ATOM | 2281 | C    | LEU | 144 | 27.921 | 32.880 | 23.792 | 0.00 | 0.00 |
| ATOM | 2282 | O    | LEU | 144 | 28.745 | 32.138 | 24.288 | 0.00 | 0.00 |
| ATOM | 2283 | N    | HIP | 145 | 26.783 | 32.411 | 23.292 | 0.00 | 0.00 |
| ATOM | 2284 | H    | HIP | 145 | 26.146 | 33.064 | 22.905 | 0.00 | 0.00 |
| ATOM | 2285 | CA   | HIP | 145 | 26.420 | 30.997 | 23.314 | 0.00 | 0.00 |
| ATOM | 2286 | HA   | HIP | 145 | 26.438 | 30.658 | 24.334 | 0.00 | 0.00 |
| ATOM | 2287 | CB   | HIP | 145 | 25.010 | 30.807 | 22.786 | 0.00 | 0.00 |
| ATOM | 2288 | HB2  | HIP | 145 | 24.795 | 31.393 | 22.220 | 0.00 | 0.00 |
| ATOM | 2289 | HB3  | HIP | 145 | 24.923 | 30.075 | 22.360 | 0.00 | 0.00 |
| ATOM | 2290 | CG   | HIP | 145 | 23.973 | 30.765 | 23.529 | 0.00 | 0.00 |
| ATOM | 2291 | ND1  | HIP | 145 | 23.605 | 31.088 | 24.383 | 0.00 | 0.00 |
| ATOM | 2292 | HD1  | HIP | 145 | 23.986 | 31.396 | 24.637 | 0.00 | 0.00 |
| ATOM | 2293 | CE1  | HIP | 145 | 22.645 | 30.876 | 24.864 | 0.00 | 0.00 |
| ATOM | 2294 | HE1  | HIP | 145 | 22.165 | 31.018 | 25.568 | 0.00 | 0.00 |
| ATOM | 2295 | NE2  | HIP | 145 | 22.388 | 30.439 | 24.335 | 0.00 | 0.00 |
| ATOM | 2296 | HE2  | HIP | 145 | 21.711 | 30.177 | 24.537 | 0.00 | 0.00 |
| ATOM | 2297 | CD2  | HIP | 145 | 23.211 | 30.362 | 23.497 | 0.00 | 0.00 |
| ATOM | 2298 | HD2  | HIP | 145 | 23.246 | 30.027 | 22.943 | 0.00 | 0.00 |
| ATOM | 2299 | C    | HIP | 145 | 27.410 | 30.115 | 22.573 | 0.00 | 0.00 |
| ATOM | 2300 | O    | HIP | 145 | 27.743 | 29.074 | 23.055 | 0.00 | 0.00 |
| ATOM | 2301 | N    | VAL | 146 | 27.932 | 30.531 | 21.441 | 0.00 | 0.00 |
| ATOM | 2302 | H    | VAL | 146 | 27.618 | 31.389 | 21.096 | 0.00 | 0.00 |
| ATOM | 2303 | CA   | VAL | 146 | 28.940 | 29.765 | 20.701 | 0.00 | 0.00 |
| ATOM | 2304 | HA   | VAL | 146 | 28.713 | 28.723 | 20.840 | 0.00 | 0.00 |
| ATOM | 2305 | CB   | VAL | 146 | 28.881 | 30.007 | 19.184 | 0.00 | 0.00 |
| ATOM | 2306 | HB   | VAL | 146 | 29.607 | 29.387 | 18.719 | 0.00 | 0.00 |
| ATOM | 2307 | CG1  | VAL | 146 | 27.547 | 29.600 | 18.639 | 0.00 | 0.00 |
| ATOM | 2308 | 1HG1 | VAL | 146 | 27.141 | 29.725 | 18.486 | 0.00 | 0.00 |
| ATOM | 2309 | 2HG1 | VAL | 146 | 27.342 | 29.397 | 18.311 | 0.00 | 0.00 |
| ATOM | 2310 | 3HG1 | VAL | 146 | 27.186 | 29.365 | 18.708 | 0.00 | 0.00 |
| ATOM | 2311 | CG2  | VAL | 146 | 29.161 | 31.407 | 18.743 | 0.00 | 0.00 |
| ATOM | 2312 | 1HG2 | VAL | 146 | 29.729 | 31.667 | 18.576 | 0.00 | 0.00 |
| ATOM | 2313 | 2HG2 | VAL | 146 | 28.934 | 31.690 | 18.227 | 0.00 | 0.00 |
| ATOM | 2314 | 3HG2 | VAL | 146 | 29.039 | 31.871 | 19.084 | 0.00 | 0.00 |
| ATOM | 2315 | C    | VAL | 146 | 30.336 | 29.943 | 21.277 | 0.00 | 0.00 |
| ATOM | 2316 | O    | VAL | 146 | 31.086 | 28.999 | 21.342 | 0.00 | 0.00 |
| ATOM | 2317 | N    | TYR | 147 | 30.659 | 31.110 | 21.802 | 0.00 | 0.00 |
| ATOM | 2318 | H    | TYR | 147 | 30.015 | 31.855 | 21.703 | 0.00 | 0.00 |
| ATOM | 2319 | CA   | TYR | 147 | 31.906 | 31.386 | 22.508 | 0.00 | 0.00 |
| ATOM | 2320 | HA   | TYR | 147 | 32.719 | 31.127 | 21.852 | 0.00 | 0.00 |
| ATOM | 2321 | CB   | TYR | 147 | 31.981 | 32.875 | 22.791 | 0.00 | 0.00 |
| ATOM | 2322 | HB2  | TYR | 147 | 31.864 | 33.377 | 21.877 | 0.00 | 0.00 |
| ATOM | 2323 | HB3  | TYR | 147 | 31.160 | 33.148 | 23.397 | 0.00 | 0.00 |
| ATOM | 2324 | CG   | TYR | 147 | 33.197 | 33.407 | 23.437 | 0.00 | 0.00 |
| ATOM | 2325 | CD1  | TYR | 147 | 33.286 | 34.085 | 24.005 | 0.00 | 0.00 |
| ATOM | 2326 | HD1  | TYR | 147 | 32.510 | 34.203 | 23.980 | 0.00 | 0.00 |
| ATOM | 2327 | CE1  | TYR | 147 | 34.388 | 34.608 | 24.585 | 0.00 | 0.00 |
| ATOM | 2328 | HE1  | TYR | 147 | 34.459 | 35.127 | 25.017 | 0.00 | 0.00 |
| ATOM | 2329 | CZ   | TYR | 147 | 35.410 | 34.458 | 24.619 | 0.00 | 0.00 |
| ATOM | 2330 | OH   | TYR | 147 | 36.469 | 34.955 | 25.197 | 0.00 | 0.00 |
| ATOM | 2331 | HH   | TYR | 147 | 37.091 | 34.775 | 25.156 | 0.00 | 0.00 |
| ATOM | 2332 | CE2  | TYR | 147 | 35.326 | 33.782 | 24.050 | 0.00 | 0.00 |
| ATOM | 2333 | HE2  | TYR | 147 | 36.106 | 33.650 | 24.065 | 0.00 | 0.00 |
| ATOM | 2334 | CD2  | TYR | 147 | 34.224 | 33.261 | 23.455 | 0.00 | 0.00 |
| ATOM | 2335 | HD2  | TYR | 147 | 34.179 | 32.755 | 23.023 | 0.00 | 0.00 |
| ATOM | 2336 | C    | TYR | 147 | 32.055 | 30.558 | 23.788 | 0.00 | 0.00 |
| ATOM | 2337 | O    | TYR | 147 | 33.090 | 29.979 | 24.008 | 0.00 | 0.00 |
| ATOM | 2338 | N    | GLN | 148 | 31.002 | 30.410 | 24.578 | 0.00 | 0.00 |
| ATOM | 2339 | H    | GLN | 148 | 30.188 | 30.923 | 24.349 | 0.00 | 0.00 |
| ATOM | 2340 | CA   | GLN | 148 | 30.953 | 29.583 | 25.781 | 0.00 | 0.00 |
| ATOM | 2341 | HA   | GLN | 148 | 31.761 | 29.860 | 26.415 | 0.00 | 0.00 |
| ATOM | 2342 | CB   | GLN | 148 | 29.661 | 29.836 | 26.512 | 0.00 | 0.00 |
| ATOM | 2343 | HB2  | GLN | 148 | 29.100 | 30.225 | 26.105 | 0.00 | 0.00 |
| ATOM | 2344 | HB3  | GLN | 148 | 29.282 | 29.195 | 26.730 | 0.00 | 0.00 |
| ATOM | 2345 | CG   | GLN | 148 | 29.621 | 30.429 | 27.525 | 0.00 | 0.00 |
| ATOM | 2346 | HG2  | GLN | 148 | 30.108 | 30.000 | 27.980 | 0.00 | 0.00 |
| ATOM | 2347 | HG3  | GLN | 148 | 30.050 | 31.068 | 27.337 | 0.00 | 0.00 |
| ATOM | 2348 | CD   | GLN | 148 | 28.363 | 30.754 | 28.196 | 0.00 | 0.00 |
| ATOM | 2349 | OE1  | GLN | 148 | 27.371 | 30.653 | 27.822 | 0.00 | 0.00 |
| ATOM | 2350 | NE2  | GLN | 148 | 28.352 | 31.163 | 29.218 | 0.00 | 0.00 |
| ATOM | 2351 | 1HE2 | GLN | 148 | 27.533 | 31.363 | 29.663 | 0.00 | 0.00 |
| ATOM | 2352 | 2HE2 | GLN | 148 | 29.153 | 31.239 | 29.563 | 0.00 | 0.00 |
| ATOM | 2353 | C    | GLN | 148 | 31.129 | 28.105 | 25.501 | 0.00 | 0.00 |
| ATOM | 2354 | O    | GLN | 148 | 31.576 | 27.392 | 26.335 | 0.00 | 0.00 |
| ATOM | 2355 | N    | HIP | 149 | 30.829 | 27.642 | 24.322 | 0.00 | 0.00 |
| ATOM | 2356 | H    | HIP | 149 | 30.455 | 28.276 | 23.700 | 0.00 | 0.00 |
| ATOM | 2357 | CA   | HIP | 149 | 31.046 | 26.272 | 23.880 | 0.00 | 0.00 |
| ATOM | 2358 | HA   | HIP | 149 | 31.197 | 25.659 | 24.741 | 0.00 | 0.00 |
| ATOM | 2359 | CB   | HIP | 149 | 29.797 | 25.769 | 23.200 | 0.00 | 0.00 |
| ATOM | 2360 | HB2  | HIP | 149 | 29.558 | 26.390 | 22.381 | 0.00 | 0.00 |
| ATOM | 2361 | HB3  | HIP | 149 | 29.991 | 24.803 | 22.824 | 0.00 | 0.00 |
| ATOM | 2362 | CG   | HIP | 149 | 28.626 | 25.677 | 24.097 | 0.00 | 0.00 |
| ATOM | 2363 | ND1  | HIP | 149 | 27.600 | 26.257 | 24.136 | 0.00 | 0.00 |
| ATOM | 2364 | HD1  | HIP | 149 | 27.480 | 26.807 | 23.555 | 0.00 | 0.00 |
| ATOM | 2365 | CE1  | HIP | 149 | 26.780 | 25.951 | 25.079 | 0.00 | 0.00 |
| ATOM | 2366 | HE1  | HIP | 149 | 25.889 | 26.260 | 25.341 | 0.00 | 0.00 |
| ATOM | 2367 | NE2  | HIP | 149 | 27.248 | 25.199 | 25.638 | 0.00 | 0.00 |
| ATOM | 2368 | HE2  | HIP | 149 | 26.838 | 24.828 | 26.368 | 0.00 | 0.00 |
| ATOM | 2369 | CD2  | HIP | 149 | 28.400 | 25.015 | 25.029 | 0.00 | 0.00 |
| ATOM | 2370 | HD2  | HIP | 149 | 29.017 | 24.453 | 25.250 | 0.00 | 0.00 |
| ATOM | 2371 | C    | HIP | 149 | 32.308 | 26.076 | 23.053 | 0.00 | 0.00 |
| ATOM | 2372 | O    | HIP | 149 | 32.472 | 25.064 | 22.442 | 0.00 | 0.00 |
| ATOM | 2373 | N    | GLY | 150 | 33.201 | 27.029 | 23.017 | 0.00 | 0.00 |
| ATOM | 2374 | H    | GLY | 150 | 33.016 | 27.835 | 23.534 | 0.00 | 0.00 |
| ATOM | 2375 | CA   | GLY | 150 | 34.491 | 26.931 | 22.360 | 0.00 | 0.00 |

|      |      |      |     |     |        |        |        |      |      |
|------|------|------|-----|-----|--------|--------|--------|------|------|
| ATOM | 2376 | HA2  | GLY | 150 | 35.081 | 27.729 | 22.696 | 0.00 | 0.00 |
| ATOM | 2377 | HA3  | GLY | 150 | 34.955 | 26.037 | 22.660 | 0.00 | 0.00 |
| ATOM | 2378 | C    | GLY | 150 | 34.493 | 26.972 | 20.853 | 0.00 | 0.00 |
| ATOM | 2379 | O    | GLY | 150 | 35.477 | 26.627 | 20.253 | 0.00 | 0.00 |
| ATOM | 2380 | N    | LEU | 151 | 33.408 | 27.370 | 20.231 | 0.00 | 0.00 |
| ATOM | 2381 | H    | LEU | 151 | 32.656 | 27.675 | 20.780 | 0.00 | 0.00 |
| ATOM | 2382 | CA   | LEU | 151 | 33.238 | 27.368 | 18.795 | 0.00 | 0.00 |
| ATOM | 2383 | HA   | LEU | 151 | 33.841 | 26.581 | 18.388 | 0.00 | 0.00 |
| ATOM | 2384 | CB   | LEU | 151 | 31.790 | 27.063 | 18.440 | 0.00 | 0.00 |
| ATOM | 2385 | HB2  | LEU | 151 | 31.212 | 27.758 | 18.850 | 0.00 | 0.00 |
| ATOM | 2386 | HB3  | LEU | 151 | 31.672 | 27.129 | 17.454 | 0.00 | 0.00 |
| ATOM | 2387 | CG   | LEU | 151 | 31.221 | 25.790 | 18.819 | 0.00 | 0.00 |
| ATOM | 2388 | HG   | LEU | 151 | 31.321 | 25.771 | 19.684 | 0.00 | 0.00 |
| ATOM | 2389 | CD1  | LEU | 151 | 29.953 | 25.607 | 18.549 | 0.00 | 0.00 |
| ATOM | 2390 | 1HD1 | LEU | 151 | 29.595 | 25.377 | 18.710 | 0.00 | 0.00 |
| ATOM | 2391 | 2HD1 | LEU | 151 | 29.638 | 25.823 | 18.478 | 0.00 | 0.00 |
| ATOM | 2392 | 3HD1 | LEU | 151 | 29.699 | 25.478 | 18.277 | 0.00 | 0.00 |
| ATOM | 2393 | CD2  | LEU | 151 | 31.709 | 24.707 | 18.303 | 0.00 | 0.00 |
| ATOM | 2394 | 1HD2 | LEU | 151 | 31.744 | 24.509 | 18.087 | 0.00 | 0.00 |
| ATOM | 2395 | 2HD2 | LEU | 151 | 31.937 | 24.480 | 18.123 | 0.00 | 0.00 |
| ATOM | 2396 | 3HD2 | LEU | 151 | 31.803 | 24.335 | 18.341 | 0.00 | 0.00 |
| ATOM | 2397 | C    | LEU | 151 | 33.761 | 28.654 | 18.182 | 0.00 | 0.00 |
| ATOM | 2398 | O    | LEU | 151 | 33.033 | 29.437 | 17.623 | 0.00 | 0.00 |
| ATOM | 2399 | N    | THR | 152 | 35.040 | 28.901 | 18.322 | 0.00 | 0.00 |
| ATOM | 2400 | H    | THR | 152 | 35.585 | 28.217 | 18.774 | 0.00 | 0.00 |
| ATOM | 2401 | CA   | THR | 152 | 35.698 | 30.139 | 17.932 | 0.00 | 0.00 |
| ATOM | 2402 | HA   | THR | 152 | 35.127 | 30.954 | 18.299 | 0.00 | 0.00 |
| ATOM | 2403 | CB   | THR | 152 | 37.050 | 30.242 | 18.558 | 0.00 | 0.00 |
| ATOM | 2404 | HB   | THR | 152 | 37.565 | 31.030 | 18.130 | 0.00 | 0.00 |
| ATOM | 2405 | CG2  | THR | 152 | 36.980 | 30.469 | 19.975 | 0.00 | 0.00 |
| ATOM | 2406 | 1HG2 | THR | 152 | 36.988 | 30.497 | 20.289 | 0.00 | 0.00 |
| ATOM | 2407 | 2HG2 | THR | 152 | 36.996 | 30.571 | 20.340 | 0.00 | 0.00 |
| ATOM | 2408 | 3HG2 | THR | 152 | 36.927 | 30.532 | 20.321 | 0.00 | 0.00 |
| ATOM | 2409 | OG1  | THR | 152 | 37.756 | 29.131 | 18.397 | 0.00 | 0.00 |
| ATOM | 2410 | HG1  | THR | 152 | 38.298 | 29.132 | 18.186 | 0.00 | 0.00 |
| ATOM | 2411 | C    | THR | 152 | 35.794 | 30.346 | 16.451 | 0.00 | 0.00 |
| ATOM | 2412 | O    | THR | 152 | 35.812 | 31.467 | 16.015 | 0.00 | 0.00 |
| ATOM | 2413 | N    | GLY | 153 | 35.772 | 29.298 | 15.658 | 0.00 | 0.00 |
| ATOM | 2414 | H    | GLY | 153 | 35.776 | 28.408 | 16.067 | 0.00 | 0.00 |
| ATOM | 2415 | CA   | GLY | 153 | 35.617 | 29.378 | 14.224 | 0.00 | 0.00 |
| ATOM | 2416 | HA2  | GLY | 153 | 36.322 | 30.064 | 13.820 | 0.00 | 0.00 |
| ATOM | 2417 | HA3  | GLY | 153 | 35.808 | 28.415 | 13.811 | 0.00 | 0.00 |
| ATOM | 2418 | C    | GLY | 153 | 34.230 | 29.802 | 13.809 | 0.00 | 0.00 |
| ATOM | 2419 | O    | GLY | 153 | 34.074 | 30.664 | 13.002 | 0.00 | 0.00 |
| ATOM | 2420 | N    | PHE | 154 | 33.214 | 29.274 | 14.417 | 0.00 | 0.00 |
| ATOM | 2421 | H    | PHE | 154 | 33.410 | 28.581 | 15.070 | 0.00 | 0.00 |
| ATOM | 2422 | CA   | PHE | 154 | 31.830 | 29.634 | 14.173 | 0.00 | 0.00 |
| ATOM | 2423 | HA   | PHE | 154 | 31.672 | 29.645 | 13.113 | 0.00 | 0.00 |
| ATOM | 2424 | CB   | PHE | 154 | 30.929 | 28.562 | 14.760 | 0.00 | 0.00 |
| ATOM | 2425 | HB2  | PHE | 154 | 31.385 | 27.630 | 14.612 | 0.00 | 0.00 |
| ATOM | 2426 | HB3  | PHE | 154 | 30.846 | 28.715 | 15.795 | 0.00 | 0.00 |
| ATOM | 2427 | CG   | PHE | 154 | 29.566 | 28.486 | 14.186 | 0.00 | 0.00 |
| ATOM | 2428 | CD1  | PHE | 154 | 29.333 | 27.882 | 13.124 | 0.00 | 0.00 |
| ATOM | 2429 | HD1  | PHE | 154 | 30.118 | 27.471 | 12.723 | 0.00 | 0.00 |
| ATOM | 2430 | CE1  | PHE | 154 | 28.084 | 27.817 | 12.583 | 0.00 | 0.00 |
| ATOM | 2431 | HE1  | PHE | 154 | 27.918 | 27.366 | 11.765 | 0.00 | 0.00 |
| ATOM | 2432 | CZ   | PHE | 154 | 27.057 | 28.343 | 13.101 | 0.00 | 0.00 |
| ATOM | 2433 | HZ   | PHE | 154 | 26.105 | 28.294 | 12.674 | 0.00 | 0.00 |
| ATOM | 2434 | CE2  | PHE | 154 | 27.278 | 28.938 | 14.161 | 0.00 | 0.00 |
| ATOM | 2435 | HE2  | PHE | 154 | 26.494 | 29.347 | 14.552 | 0.00 | 0.00 |
| ATOM | 2436 | CD2  | PHE | 154 | 28.530 | 29.009 | 14.707 | 0.00 | 0.00 |
| ATOM | 2437 | HD2  | PHE | 154 | 28.699 | 29.469 | 15.517 | 0.00 | 0.00 |
| ATOM | 2438 | C    | PHE | 154 | 31.480 | 31.028 | 14.685 | 0.00 | 0.00 |
| ATOM | 2439 | O    | PHE | 154 | 30.707 | 31.725 | 14.062 | 0.00 | 0.00 |
| ATOM | 2440 | N    | LEU | 155 | 32.117 | 31.489 | 15.752 | 0.00 | 0.00 |
| ATOM | 2441 | H    | LEU | 155 | 32.691 | 30.849 | 16.242 | 0.00 | 0.00 |
| ATOM | 2442 | CA   | LEU | 155 | 32.024 | 32.864 | 16.231 | 0.00 | 0.00 |
| ATOM | 2443 | HA   | LEU | 155 | 30.996 | 33.058 | 16.483 | 0.00 | 0.00 |
| ATOM | 2444 | CB   | LEU | 155 | 32.876 | 32.997 | 17.494 | 0.00 | 0.00 |
| ATOM | 2445 | HB2  | LEU | 155 | 32.509 | 32.302 | 18.221 | 0.00 | 0.00 |
| ATOM | 2446 | HB3  | LEU | 155 | 33.876 | 32.717 | 17.247 | 0.00 | 0.00 |
| ATOM | 2447 | CG   | LEU | 155 | 32.948 | 34.381 | 18.131 | 0.00 | 0.00 |
| ATOM | 2448 | HG   | LEU | 155 | 33.364 | 35.073 | 17.437 | 0.00 | 0.00 |
| ATOM | 2449 | CD1  | LEU | 155 | 31.610 | 34.891 | 18.561 | 0.00 | 0.00 |
| ATOM | 2450 | 1HD1 | LEU | 155 | 31.290 | 34.736 | 18.999 | 0.00 | 0.00 |
| ATOM | 2451 | 2HD1 | LEU | 155 | 31.454 | 35.430 | 18.718 | 0.00 | 0.00 |
| ATOM | 2452 | 3HD1 | LEU | 155 | 31.125 | 34.904 | 18.284 | 0.00 | 0.00 |
| ATOM | 2453 | CD2  | LEU | 155 | 33.843 | 34.326 | 19.338 | 0.00 | 0.00 |
| ATOM | 2454 | 1HD2 | LEU | 155 | 34.065 | 34.589 | 19.650 | 0.00 | 0.00 |
| ATOM | 2455 | 2HD2 | LEU | 155 | 33.884 | 34.163 | 19.778 | 0.00 | 0.00 |
| ATOM | 2456 | 3HD2 | LEU | 155 | 34.246 | 34.194 | 19.461 | 0.00 | 0.00 |
| ATOM | 2457 | C    | LEU | 155 | 32.428 | 33.887 | 15.166 | 0.00 | 0.00 |
| ATOM | 2458 | O    | LEU | 155 | 31.785 | 34.917 | 15.034 | 0.00 | 0.00 |
| ATOM | 2459 | N    | GLY | 156 | 33.436 | 33.589 | 14.355 | 0.00 | 0.00 |
| ATOM | 2460 | H    | GLY | 156 | 33.931 | 32.743 | 14.518 | 0.00 | 0.00 |
| ATOM | 2461 | CA   | GLY | 156 | 33.816 | 34.405 | 13.211 | 0.00 | 0.00 |
| ATOM | 2462 | HA2  | GLY | 156 | 34.018 | 35.408 | 13.532 | 0.00 | 0.00 |
| ATOM | 2463 | HA3  | GLY | 156 | 34.713 | 34.006 | 12.782 | 0.00 | 0.00 |
| ATOM | 2464 | C    | GLY | 156 | 32.756 | 34.458 | 12.120 | 0.00 | 0.00 |
| ATOM | 2465 | O    | GLY | 156 | 32.493 | 35.507 | 11.584 | 0.00 | 0.00 |
| ATOM | 2466 | N    | GLN | 157 | 32.076 | 33.359 | 11.852 | 0.00 | 0.00 |
| ATOM | 2467 | H    | GLN | 157 | 32.322 | 32.543 | 12.346 | 0.00 | 0.00 |
| ATOM | 2468 | CA   | GLN | 157 | 30.977 | 33.276 | 10.892 | 0.00 | 0.00 |
| ATOM | 2469 | HA   | GLN | 157 | 31.284 | 33.779 | 9.989  | 0.00 | 0.00 |
| ATOM | 2470 | CB   | GLN | 157 | 30.683 | 31.822 | 10.538 | 0.00 | 0.00 |
| ATOM | 2471 | HB2  | GLN | 157 | 30.427 | 31.273 | 11.414 | 0.00 | 0.00 |
| ATOM | 2472 | HB3  | GLN | 157 | 29.844 | 31.803 | 9.882  | 0.00 | 0.00 |
| ATOM | 2473 | CG   | GLN | 157 | 31.844 | 31.138 | 9.860  | 0.00 | 0.00 |
| ATOM | 2474 | HG2  | GLN | 157 | 32.043 | 31.605 | 9.004  | 0.00 | 0.00 |
| ATOM | 2475 | HG3  | GLN | 157 | 32.662 | 31.206 | 10.432 | 0.00 | 0.00 |
| ATOM | 2476 | CD   | GLN | 157 | 31.657 | 29.743 | 9.555  | 0.00 | 0.00 |
| ATOM | 2477 | OE1  | GLN | 157 | 31.020 | 29.125 | 9.606  | 0.00 | 0.00 |
| ATOM | 2478 | NE2  | GLN | 157 | 32.205 | 29.188 | 9.227  | 0.00 | 0.00 |
| ATOM | 2479 | 1HE2 | GLN | 157 | 32.082 | 28.285 | 9.013  | 0.00 | 0.00 |
| ATOM | 2480 | 2HE2 | GLN | 157 | 32.750 | 29.668 | 9.166  | 0.00 | 0.00 |

|      |      |      |     |     |        |        |        |      |      |
|------|------|------|-----|-----|--------|--------|--------|------|------|
| ATOM | 2481 | C    | GLN | 157 | 29.715 | 33.993 | 11.380 | 0.00 | 0.00 |
| ATOM | 2482 | O    | GLN | 157 | 29.075 | 34.684 | 10.606 | 0.00 | 0.00 |
| ATOM | 2483 | N    | VAL | 158 | 29.394 | 33.912 | 12.667 | 0.00 | 0.00 |
| ATOM | 2484 | H    | VAL | 158 | 29.919 | 33.272 | 13.215 | 0.00 | 0.00 |
| ATOM | 2485 | CA   | VAL | 158 | 28.326 | 34.687 | 13.301 | 0.00 | 0.00 |
| ATOM | 2486 | HA   | VAL | 158 | 27.418 | 34.556 | 12.734 | 0.00 | 0.00 |
| ATOM | 2487 | CB   | VAL | 158 | 28.062 | 34.200 | 14.733 | 0.00 | 0.00 |
| ATOM | 2488 | HB   | VAL | 158 | 28.986 | 34.159 | 15.262 | 0.00 | 0.00 |
| ATOM | 2489 | CG1  | VAL | 158 | 27.120 | 35.085 | 15.504 | 0.00 | 0.00 |
| ATOM | 2490 | 1HG1 | VAL | 158 | 27.227 | 35.833 | 15.521 | 0.00 | 0.00 |
| ATOM | 2491 | 2HG1 | VAL | 158 | 26.392 | 35.101 | 15.330 | 0.00 | 0.00 |
| ATOM | 2492 | 3HG1 | VAL | 158 | 27.066 | 34.971 | 16.245 | 0.00 | 0.00 |
| ATOM | 2493 | CG2  | VAL | 158 | 27.460 | 32.821 | 14.737 | 0.00 | 0.00 |
| ATOM | 2494 | 1HG2 | VAL | 158 | 27.322 | 32.476 | 14.442 | 0.00 | 0.00 |
| ATOM | 2495 | 2HG2 | VAL | 158 | 27.554 | 32.387 | 14.896 | 0.00 | 0.00 |
| ATOM | 2496 | 3HG2 | VAL | 158 | 27.076 | 32.580 | 14.876 | 0.00 | 0.00 |
| ATOM | 2497 | C    | VAL | 158 | 28.645 | 36.175 | 13.270 | 0.00 | 0.00 |
| ATOM | 2498 | O    | VAL | 158 | 27.785 | 36.966 | 12.946 | 0.00 | 0.00 |
| ATOM | 2499 | N    | THR | 159 | 29.887 | 36.566 | 13.527 | 0.00 | 0.00 |
| ATOM | 2500 | H    | THR | 159 | 30.543 | 35.877 | 13.799 | 0.00 | 0.00 |
| ATOM | 2501 | CA   | THR | 159 | 30.344 | 37.955 | 13.447 | 0.00 | 0.00 |
| ATOM | 2502 | HA   | THR | 159 | 29.729 | 38.566 | 14.087 | 0.00 | 0.00 |
| ATOM | 2503 | CB   | THR | 159 | 31.787 | 38.081 | 13.921 | 0.00 | 0.00 |
| ATOM | 2504 | HB   | THR | 159 | 32.414 | 37.442 | 13.335 | 0.00 | 0.00 |
| ATOM | 2505 | CG2  | THR | 159 | 32.332 | 39.486 | 13.847 | 0.00 | 0.00 |
| ATOM | 2506 | 1HG2 | THR | 159 | 32.493 | 39.809 | 13.872 | 0.00 | 0.00 |
| ATOM | 2507 | 2HG2 | THR | 159 | 32.490 | 39.794 | 13.783 | 0.00 | 0.00 |
| ATOM | 2508 | 3HG2 | THR | 159 | 32.432 | 39.853 | 13.819 | 0.00 | 0.00 |
| ATOM | 2509 | OG1  | THR | 159 | 31.879 | 37.687 | 15.255 | 0.00 | 0.00 |
| ATOM | 2510 | HG1  | THR | 159 | 31.874 | 36.790 | 15.295 | 0.00 | 0.00 |
| ATOM | 2511 | C    | THR | 159 | 30.199 | 38.499 | 12.034 | 0.00 | 0.00 |
| ATOM | 2512 | O    | THR | 159 | 29.691 | 39.592 | 11.859 | 0.00 | 0.00 |
| ATOM | 2513 | N    | ARG | 160 | 30.564 | 37.726 | 11.019 | 0.00 | 0.00 |
| ATOM | 2514 | H    | ARG | 160 | 30.996 | 36.857 | 11.225 | 0.00 | 0.00 |
| ATOM | 2515 | CA   | ARG | 160 | 30.422 | 38.127 | 9.620  | 0.00 | 0.00 |
| ATOM | 2516 | HA   | ARG | 160 | 30.791 | 39.137 | 9.547  | 0.00 | 0.00 |
| ATOM | 2517 | CB   | ARG | 160 | 31.271 | 37.225 | 8.724  | 0.00 | 0.00 |
| ATOM | 2518 | HB2  | ARG | 160 | 32.241 | 37.112 | 9.164  | 0.00 | 0.00 |
| ATOM | 2519 | HB3  | ARG | 160 | 30.823 | 36.258 | 8.679  | 0.00 | 0.00 |
| ATOM | 2520 | CG   | ARG | 160 | 31.448 | 37.756 | 7.313  | 0.00 | 0.00 |
| ATOM | 2521 | HG2  | ARG | 160 | 31.923 | 37.019 | 6.713  | 0.00 | 0.00 |
| ATOM | 2522 | HG3  | ARG | 160 | 30.502 | 37.960 | 6.890  | 0.00 | 0.00 |
| ATOM | 2523 | CD   | ARG | 160 | 32.292 | 38.991 | 7.255  | 0.00 | 0.00 |
| ATOM | 2524 | HD2  | ARG | 160 | 32.025 | 39.626 | 8.009  | 0.00 | 0.00 |
| ATOM | 2525 | HD3  | ARG | 160 | 33.263 | 38.729 | 7.388  | 0.00 | 0.00 |
| ATOM | 2526 | NE   | ARG | 160 | 32.187 | 39.694 | 6.040  | 0.00 | 0.00 |
| ATOM | 2527 | HE   | ARG | 160 | 31.730 | 39.245 | 5.330  | 0.00 | 0.00 |
| ATOM | 2528 | CZ   | ARG | 160 | 32.640 | 40.872 | 5.780  | 0.00 | 0.00 |
| ATOM | 2529 | NH1  | ARG | 160 | 32.432 | 41.392 | 4.672  | 0.00 | 0.00 |
| ATOM | 2530 | 1HH1 | ARG | 160 | 31.928 | 40.900 | 4.029  | 0.00 | 0.00 |
| ATOM | 2531 | 2HH1 | ARG | 160 | 32.772 | 42.275 | 4.469  | 0.00 | 0.00 |
| ATOM | 2532 | NH2  | ARG | 160 | 33.294 | 41.561 | 6.586  | 0.00 | 0.00 |
| ATOM | 2533 | 1HH2 | ARG | 160 | 33.532 | 41.184 | 7.445  | 0.00 | 0.00 |
| ATOM | 2534 | 2HH2 | ARG | 160 | 33.611 | 42.449 | 6.328  | 0.00 | 0.00 |
| ATOM | 2535 | C    | ARG | 160 | 28.963 | 38.193 | 9.174  | 0.00 | 0.00 |
| ATOM | 2536 | O    | ARG | 160 | 28.605 | 39.106 | 8.456  | 0.00 | 0.00 |
| ATOM | 2537 | N    | PHE | 161 | 28.103 | 37.304 | 9.655  | 0.00 | 0.00 |
| ATOM | 2538 | H    | PHE | 161 | 28.459 | 36.565 | 10.214 | 0.00 | 0.00 |
| ATOM | 2539 | CA   | PHE | 161 | 26.669 | 37.338 | 9.381  | 0.00 | 0.00 |
| ATOM | 2540 | HA   | PHE | 161 | 26.530 | 37.320 | 8.311  | 0.00 | 0.00 |
| ATOM | 2541 | CB   | PHE | 161 | 25.991 | 36.102 | 9.962  | 0.00 | 0.00 |
| ATOM | 2542 | HB2  | PHE | 161 | 26.343 | 35.246 | 9.462  | 0.00 | 0.00 |
| ATOM | 2543 | HB3  | PHE | 161 | 26.266 | 36.003 | 10.968 | 0.00 | 0.00 |
| ATOM | 2544 | CG   | PHE | 161 | 24.520 | 36.121 | 9.881  | 0.00 | 0.00 |
| ATOM | 2545 | CD1  | PHE | 161 | 23.790 | 36.479 | 10.926 | 0.00 | 0.00 |
| ATOM | 2546 | HD1  | PHE | 161 | 24.267 | 36.719 | 11.793 | 0.00 | 0.00 |
| ATOM | 2547 | CE1  | PHE | 161 | 22.441 | 36.554 | 10.833 | 0.00 | 0.00 |
| ATOM | 2548 | HE1  | PHE | 161 | 21.890 | 36.851 | 11.624 | 0.00 | 0.00 |
| ATOM | 2549 | CZ   | PHE | 161 | 21.817 | 36.264 | 9.700  | 0.00 | 0.00 |
| ATOM | 2550 | HZ   | PHE | 161 | 20.787 | 36.325 | 9.627  | 0.00 | 0.00 |
| ATOM | 2551 | CE2  | PHE | 161 | 22.536 | 35.893 | 8.666  | 0.00 | 0.00 |
| ATOM | 2552 | HE2  | PHE | 161 | 22.052 | 35.661 | 7.807  | 0.00 | 0.00 |
| ATOM | 2553 | CD2  | PHE | 161 | 23.886 | 35.822 | 8.754  | 0.00 | 0.00 |
| ATOM | 2554 | HD2  | PHE | 161 | 24.436 | 35.548 | 7.954  | 0.00 | 0.00 |
| ATOM | 2555 | C    | PHE | 161 | 26.009 | 38.619 | 9.893  | 0.00 | 0.00 |
| ATOM | 2556 | O    | PHE | 161 | 25.212 | 39.201 | 9.179  | 0.00 | 0.00 |
| ATOM | 2557 | N    | VAL | 162 | 26.354 | 39.096 | 11.087 | 0.00 | 0.00 |
| ATOM | 2558 | H    | VAL | 162 | 26.994 | 38.565 | 11.633 | 0.00 | 0.00 |
| ATOM | 2559 | CA   | VAL | 162 | 25.783 | 40.327 | 11.653 | 0.00 | 0.00 |
| ATOM | 2560 | HA   | VAL | 162 | 24.711 | 40.234 | 11.609 | 0.00 | 0.00 |
| ATOM | 2561 | CB   | VAL | 162 | 26.163 | 40.511 | 13.123 | 0.00 | 0.00 |
| ATOM | 2562 | HB   | VAL | 162 | 27.158 | 40.396 | 13.225 | 0.00 | 0.00 |
| ATOM | 2563 | CG1  | VAL | 162 | 25.824 | 41.793 | 13.683 | 0.00 | 0.00 |
| ATOM | 2564 | 1HG1 | VAL | 162 | 26.124 | 42.286 | 13.566 | 0.00 | 0.00 |
| ATOM | 2565 | 2HG1 | VAL | 162 | 25.311 | 42.094 | 13.591 | 0.00 | 0.00 |
| ATOM | 2566 | 3HG1 | VAL | 162 | 25.811 | 41.933 | 14.314 | 0.00 | 0.00 |
| ATOM | 2567 | CG2  | VAL | 162 | 25.532 | 39.543 | 13.982 | 0.00 | 0.00 |
| ATOM | 2568 | 1HG2 | VAL | 162 | 25.409 | 39.325 | 14.250 | 0.00 | 0.00 |
| ATOM | 2569 | 2HG2 | VAL | 162 | 25.344 | 39.314 | 14.165 | 0.00 | 0.00 |
| ATOM | 2570 | 3HG2 | VAL | 162 | 25.383 | 39.270 | 14.165 | 0.00 | 0.00 |
| ATOM | 2571 | C    | VAL | 162 | 26.125 | 41.550 | 10.807 | 0.00 | 0.00 |
| ATOM | 2572 | O    | VAL | 162 | 25.242 | 42.342 | 10.519 | 0.00 | 0.00 |
| ATOM | 2573 | N    | VAL | 163 | 27.359 | 41.690 | 10.335 | 0.00 | 0.00 |
| ATOM | 2574 | H    | VAL | 163 | 28.038 | 41.006 | 10.576 | 0.00 | 0.00 |
| ATOM | 2575 | CA   | VAL | 163 | 27.745 | 42.840 | 9.495  | 0.00 | 0.00 |
| ATOM | 2576 | HA   | VAL | 163 | 27.248 | 43.707 | 9.902  | 0.00 | 0.00 |
| ATOM | 2577 | CB   | VAL | 163 | 29.238 | 43.164 | 9.556  | 0.00 | 0.00 |
| ATOM | 2578 | HB   | VAL | 163 | 29.381 | 44.091 | 9.038  | 0.00 | 0.00 |
| ATOM | 2579 | CG1  | VAL | 163 | 29.680 | 43.380 | 10.977 | 0.00 | 0.00 |
| ATOM | 2580 | 1HG1 | VAL | 163 | 29.563 | 42.890 | 11.475 | 0.00 | 0.00 |
| ATOM | 2581 | 2HG1 | VAL | 163 | 30.374 | 43.486 | 11.122 | 0.00 | 0.00 |
| ATOM | 2582 | 3HG1 | VAL | 163 | 29.433 | 43.939 | 11.355 | 0.00 | 0.00 |
| ATOM | 2583 | CG2  | VAL | 163 | 30.138 | 42.148 | 8.916  | 0.00 | 0.00 |
| ATOM | 2584 | 1HG2 | VAL | 163 | 30.237 | 41.873 | 8.571  | 0.00 | 0.00 |
| ATOM | 2585 | 2HG2 | VAL | 163 | 30.524 | 42.077 | 8.768  | 0.00 | 0.00 |

|      |      |      |     |     |        |        |        |      |      |
|------|------|------|-----|-----|--------|--------|--------|------|------|
| ATOM | 2586 | 3HG2 | VAL | 163 | 30.331 | 41.769 | 8.942  | 0.00 | 0.00 |
| ATOM | 2587 | C    | VAL | 163 | 27.246 | 42.735 | 8.060  | 0.00 | 0.00 |
| ATOM | 2588 | O    | VAL | 163 | 26.898 | 43.742 | 7.467  | 0.00 | 0.00 |
| ATOM | 2589 | N    | ASP | 164 | 27.114 | 41.531 | 7.524  | 0.00 | 0.00 |
| ATOM | 2590 | H    | ASP | 164 | 27.457 | 40.752 | 8.042  | 0.00 | 0.00 |
| ATOM | 2591 | CA   | ASP | 164 | 26.496 | 41.277 | 6.224  | 0.00 | 0.00 |
| ATOM | 2592 | HA   | ASP | 164 | 26.946 | 41.936 | 5.498  | 0.00 | 0.00 |
| ATOM | 2593 | CB   | ASP | 164 | 26.773 | 39.838 | 5.815  | 0.00 | 0.00 |
| ATOM | 2594 | HB2  | ASP | 164 | 27.828 | 39.657 | 5.849  | 0.00 | 0.00 |
| ATOM | 2595 | HB3  | ASP | 164 | 26.309 | 39.166 | 6.503  | 0.00 | 0.00 |
| ATOM | 2596 | CG   | ASP | 164 | 26.277 | 39.543 | 4.425  | 0.00 | 0.00 |
| ATOM | 2597 | OD1  | ASP | 164 | 26.871 | 39.653 | 3.575  | 0.00 | 0.00 |
| ATOM | 2598 | OD2  | ASP | 164 | 25.281 | 39.236 | 4.170  | 0.00 | 0.00 |
| ATOM | 2599 | C    | ASP | 164 | 24.993 | 41.567 | 6.245  | 0.00 | 0.00 |
| ATOM | 2600 | O    | ASP | 164 | 24.469 | 42.152 | 5.307  | 0.00 | 0.00 |
| ATOM | 2601 | N    | PHE | 165 | 24.304 | 41.233 | 7.332  | 0.00 | 0.00 |
| ATOM | 2602 | H    | PHE | 165 | 24.768 | 40.720 | 8.049  | 0.00 | 0.00 |
| ATOM | 2603 | CA   | PHE | 165 | 22.905 | 41.596 | 7.545  | 0.00 | 0.00 |
| ATOM | 2604 | HA   | PHE | 165 | 22.335 | 41.267 | 6.687  | 0.00 | 0.00 |
| ATOM | 2605 | CB   | PHE | 165 | 22.348 | 40.886 | 8.784  | 0.00 | 0.00 |
| ATOM | 2606 | HB2  | PHE | 165 | 22.485 | 39.828 | 8.666  | 0.00 | 0.00 |
| ATOM | 2607 | HB3  | PHE | 165 | 22.906 | 41.185 | 9.650  | 0.00 | 0.00 |
| ATOM | 2608 | CG   | PHE | 165 | 20.886 | 41.146 | 9.029  | 0.00 | 0.00 |
| ATOM | 2609 | CD1  | PHE | 165 | 19.930 | 40.314 | 8.495  | 0.00 | 0.00 |
| ATOM | 2610 | HD1  | PHE | 165 | 20.230 | 39.469 | 7.949  | 0.00 | 0.00 |
| ATOM | 2611 | CE1  | PHE | 165 | 18.581 | 40.603 | 8.649  | 0.00 | 0.00 |
| ATOM | 2612 | HE1  | PHE | 165 | 17.848 | 39.979 | 8.226  | 0.00 | 0.00 |
| ATOM | 2613 | CZ   | PHE | 165 | 18.185 | 41.726 | 9.333  | 0.00 | 0.00 |
| ATOM | 2614 | HZ   | PHE | 165 | 17.158 | 41.966 | 9.417  | 0.00 | 0.00 |
| ATOM | 2615 | CE2  | PHE | 165 | 19.136 | 42.537 | 9.900  | 0.00 | 0.00 |
| ATOM | 2616 | HE2  | PHE | 165 | 18.829 | 43.385 | 10.439 | 0.00 | 0.00 |
| ATOM | 2617 | CD2  | PHE | 165 | 20.482 | 42.242 | 9.756  | 0.00 | 0.00 |
| ATOM | 2618 | HD2  | PHE | 165 | 21.204 | 42.877 | 10.181 | 0.00 | 0.00 |
| ATOM | 2619 | C    | PHE | 165 | 22.749 | 43.114 | 7.645  | 0.00 | 0.00 |
| ATOM | 2620 | O    | PHE | 165 | 21.890 | 43.684 | 6.994  | 0.00 | 0.00 |
| ATOM | 2621 | N    | MET | 166 | 23.610 | 43.787 | 8.408  | 0.00 | 0.00 |
| ATOM | 2622 | H    | MET | 166 | 24.280 | 43.268 | 8.927  | 0.00 | 0.00 |
| ATOM | 2623 | CA   | MET | 166 | 23.603 | 45.247 | 8.509  | 0.00 | 0.00 |
| ATOM | 2624 | HA   | MET | 166 | 22.617 | 45.549 | 8.825  | 0.00 | 0.00 |
| ATOM | 2625 | CB   | MET | 166 | 24.617 | 45.740 | 9.539  | 0.00 | 0.00 |
| ATOM | 2626 | HB2  | MET | 166 | 25.563 | 45.278 | 9.350  | 0.00 | 0.00 |
| ATOM | 2627 | HB3  | MET | 166 | 24.741 | 46.802 | 9.425  | 0.00 | 0.00 |
| ATOM | 2628 | CG   | MET | 166 | 24.199 | 45.457 | 10.961 | 0.00 | 0.00 |
| ATOM | 2629 | HG2  | MET | 166 | 23.329 | 45.566 | 11.075 | 0.00 | 0.00 |
| ATOM | 2630 | HG3  | MET | 166 | 24.351 | 44.614 | 11.170 | 0.00 | 0.00 |
| ATOM | 2631 | SD   | MET | 166 | 24.821 | 46.248 | 12.169 | 0.00 | 0.00 |
| ATOM | 2632 | CE   | MET | 166 | 24.662 | 46.205 | 13.247 | 0.00 | 0.00 |
| ATOM | 2633 | HE1  | MET | 166 | 24.582 | 46.266 | 13.463 | 0.00 | 0.00 |
| ATOM | 2634 | HE2  | MET | 166 | 24.610 | 46.127 | 13.445 | 0.00 | 0.00 |
| ATOM | 2635 | HE3  | MET | 166 | 24.708 | 46.211 | 13.497 | 0.00 | 0.00 |
| ATOM | 2636 | C    | MET | 166 | 23.840 | 45.927 | 7.162  | 0.00 | 0.00 |
| ATOM | 2637 | O    | MET | 166 | 23.173 | 46.903 | 6.857  | 0.00 | 0.00 |
| ATOM | 2638 | N    | LEU | 167 | 24.727 | 45.393 | 6.330  | 0.00 | 0.00 |
| ATOM | 2639 | H    | LEU | 167 | 25.264 | 44.623 | 6.656  | 0.00 | 0.00 |
| ATOM | 2640 | CA   | LEU | 167 | 24.969 | 45.877 | 4.977  | 0.00 | 0.00 |
| ATOM | 2641 | HA   | LEU | 167 | 25.161 | 46.939 | 5.031  | 0.00 | 0.00 |
| ATOM | 2642 | CB   | LEU | 167 | 26.222 | 45.193 | 4.423  | 0.00 | 0.00 |
| ATOM | 2643 | HB2  | LEU | 167 | 27.039 | 45.406 | 5.081  | 0.00 | 0.00 |
| ATOM | 2644 | HB3  | LEU | 167 | 26.068 | 44.133 | 4.437  | 0.00 | 0.00 |
| ATOM | 2645 | CG   | LEU | 167 | 26.623 | 45.584 | 3.006  | 0.00 | 0.00 |
| ATOM | 2646 | HG   | LEU | 167 | 25.840 | 45.312 | 2.338  | 0.00 | 0.00 |
| ATOM | 2647 | CD1  | LEU | 167 | 26.894 | 47.052 | 2.860  | 0.00 | 0.00 |
| ATOM | 2648 | 1HD1 | LEU | 167 | 27.076 | 47.411 | 2.979  | 0.00 | 0.00 |
| ATOM | 2649 | 2HD1 | LEU | 167 | 27.029 | 47.361 | 2.625  | 0.00 | 0.00 |
| ATOM | 2650 | 3HD1 | LEU | 167 | 26.758 | 47.468 | 2.835  | 0.00 | 0.00 |
| ATOM | 2651 | CD2  | LEU | 167 | 27.870 | 44.838 | 2.607  | 0.00 | 0.00 |
| ATOM | 2652 | 1HD2 | LEU | 167 | 28.028 | 44.338 | 2.684  | 0.00 | 0.00 |
| ATOM | 2653 | 2HD2 | LEU | 167 | 28.099 | 44.714 | 2.128  | 0.00 | 0.00 |
| ATOM | 2654 | 3HD2 | LEU | 167 | 28.383 | 44.911 | 2.706  | 0.00 | 0.00 |
| ATOM | 2655 | C    | LEU | 167 | 23.741 | 45.689 | 4.084  | 0.00 | 0.00 |
| ATOM | 2656 | O    | LEU | 167 | 23.289 | 46.630 | 3.478  | 0.00 | 0.00 |
| ATOM | 2657 | N    | HIP | 168 | 23.164 | 44.498 | 4.045  | 0.00 | 0.00 |
| ATOM | 2658 | H    | HIP | 168 | 23.579 | 43.785 | 4.592  | 0.00 | 0.00 |
| ATOM | 2659 | CA   | HIP | 168 | 22.071 | 44.135 | 3.135  | 0.00 | 0.00 |
| ATOM | 2660 | HA   | HIP | 168 | 22.220 | 44.674 | 2.217  | 0.00 | 0.00 |
| ATOM | 2661 | CB   | HIP | 168 | 22.176 | 42.651 | 2.806  | 0.00 | 0.00 |
| ATOM | 2662 | HB2  | HIP | 168 | 22.152 | 42.072 | 3.708  | 0.00 | 0.00 |
| ATOM | 2663 | HB3  | HIP | 168 | 21.334 | 42.368 | 2.210  | 0.00 | 0.00 |
| ATOM | 2664 | CG   | HIP | 168 | 23.401 | 42.317 | 2.034  | 0.00 | 0.00 |
| ATOM | 2665 | ND1  | HIP | 168 | 24.427 | 41.511 | 2.406  | 0.00 | 0.00 |
| ATOM | 2666 | HD1  | HIP | 168 | 24.506 | 41.033 | 3.243  | 0.00 | 0.00 |
| ATOM | 2667 | CE1  | HIP | 168 | 25.318 | 41.473 | 1.449  | 0.00 | 0.00 |
| ATOM | 2668 | HE1  | HIP | 168 | 26.218 | 40.920 | 1.461  | 0.00 | 0.00 |
| ATOM | 2669 | NE2  | HIP | 168 | 24.888 | 42.228 | 0.489  | 0.00 | 0.00 |
| ATOM | 2670 | HE2  | HIP | 168 | 25.355 | 42.368 | -0.335 | 0.00 | 0.00 |
| ATOM | 2671 | CD2  | HIP | 168 | 23.692 | 42.761 | 0.837  | 0.00 | 0.00 |
| ATOM | 2672 | HD2  | HIP | 168 | 23.091 | 43.404 | 0.276  | 0.00 | 0.00 |
| ATOM | 2673 | C    | HIP | 168 | 20.674 | 44.556 | 3.582  | 0.00 | 0.00 |
| ATOM | 2674 | O    | HIP | 168 | 19.768 | 44.341 | 2.877  | 0.00 | 0.00 |
| ATOM | 2675 | N    | HIP | 169 | 20.497 | 45.170 | 4.721  | 0.00 | 0.00 |
| ATOM | 2676 | H    | HIP | 169 | 21.282 | 45.214 | 5.275  | 0.00 | 0.00 |
| ATOM | 2677 | CA   | HIP | 169 | 19.250 | 45.762 | 5.217  | 0.00 | 0.00 |
| ATOM | 2678 | HA   | HIP | 169 | 18.524 | 45.725 | 4.422  | 0.00 | 0.00 |
| ATOM | 2679 | CB   | HIP | 169 | 18.680 | 44.923 | 6.366  | 0.00 | 0.00 |
| ATOM | 2680 | HB2  | HIP | 169 | 19.411 | 44.809 | 7.141  | 0.00 | 0.00 |
| ATOM | 2681 | HB3  | HIP | 169 | 17.839 | 45.435 | 6.794  | 0.00 | 0.00 |
| ATOM | 2682 | CG   | HIP | 169 | 18.204 | 43.575 | 5.930  | 0.00 | 0.00 |
| ATOM | 2683 | ND1  | HIP | 169 | 16.986 | 43.281 | 5.468  | 0.00 | 0.00 |
| ATOM | 2684 | HD1  | HIP | 169 | 16.262 | 43.918 | 5.388  | 0.00 | 0.00 |
| ATOM | 2685 | CE1  | HIP | 169 | 16.961 | 41.999 | 5.113  | 0.00 | 0.00 |
| ATOM | 2686 | HE1  | HIP | 169 | 16.160 | 41.489 | 4.685  | 0.00 | 0.00 |
| ATOM | 2687 | NE2  | HIP | 169 | 18.119 | 41.473 | 5.344  | 0.00 | 0.00 |
| ATOM | 2688 | HE2  | HIP | 169 | 18.380 | 40.544 | 5.139  | 0.00 | 0.00 |
| ATOM | 2689 | CD2  | HIP | 169 | 18.912 | 42.446 | 5.857  | 0.00 | 0.00 |
| ATOM | 2690 | HD2  | HIP | 169 | 19.900 | 42.345 | 6.138  | 0.00 | 0.00 |

|      |      |      |     |     |        |        |        |      |      |
|------|------|------|-----|-----|--------|--------|--------|------|------|
| ATOM | 2691 | C    | HIP | 169 | 19.370 | 47.258 | 5.540  | 0.00 | 0.00 |
| ATOM | 2692 | O    | HIP | 169 | 18.726 | 47.748 | 6.441  | 0.00 | 0.00 |
| ATOM | 2693 | N    | CYS | 170 | 20.218 | 47.982 | 4.823  | 0.00 | 0.00 |
| ATOM | 2694 | H    | CYS | 170 | 20.665 | 47.516 | 4.073  | 0.00 | 0.00 |
| ATOM | 2695 | CA   | CYS | 170 | 20.436 | 49.431 | 4.916  | 0.00 | 0.00 |
| ATOM | 2696 | HA   | CYS | 170 | 21.251 | 49.653 | 4.251  | 0.00 | 0.00 |
| ATOM | 2697 | CB   | CYS | 170 | 19.240 | 50.173 | 4.339  | 0.00 | 0.00 |
| ATOM | 2698 | HB2  | CYS | 170 | 18.421 | 49.933 | 4.759  | 0.00 | 0.00 |
| ATOM | 2699 | HB3  | CYS | 170 | 19.322 | 51.114 | 4.450  | 0.00 | 0.00 |
| ATOM | 2700 | SG   | CYS | 170 | 19.018 | 49.930 | 2.771  | 0.00 | 0.00 |
| ATOM | 2701 | HG   | CYS | 170 | 18.799 | 50.045 | 2.652  | 0.00 | 0.00 |
| ATOM | 2702 | C    | CYS | 170 | 20.897 | 49.981 | 6.272  | 0.00 | 0.00 |
| ATOM | 2703 | O    | CYS | 170 | 20.905 | 51.178 | 6.461  | 0.00 | 0.00 |
| ATOM | 2704 | N    | ILE | 171 | 21.311 | 49.156 | 7.222  | 0.00 | 0.00 |
| ATOM | 2705 | H    | ILE | 171 | 21.347 | 48.197 | 7.010  | 0.00 | 0.00 |
| ATOM | 2706 | CA   | ILE | 171 | 21.725 | 49.590 | 8.561  | 0.00 | 0.00 |
| ATOM | 2707 | HA   | ILE | 171 | 21.057 | 50.382 | 8.870  | 0.00 | 0.00 |
| ATOM | 2708 | CB   | ILE | 171 | 21.600 | 48.454 | 9.600  | 0.00 | 0.00 |
| ATOM | 2709 | HB   | ILE | 171 | 22.347 | 47.726 | 9.376  | 0.00 | 0.00 |
| ATOM | 2710 | CG2  | ILE | 171 | 21.881 | 48.971 | 10.998 | 0.00 | 0.00 |
| ATOM | 2711 | 1HG2 | ILE | 171 | 22.222 | 49.267 | 11.231 | 0.00 | 0.00 |
| ATOM | 2712 | 2HG2 | ILE | 171 | 21.650 | 49.248 | 11.337 | 0.00 | 0.00 |
| ATOM | 2713 | 3HG2 | ILE | 171 | 21.993 | 48.785 | 11.467 | 0.00 | 0.00 |
| ATOM | 2714 | CG1  | ILE | 171 | 20.244 | 47.765 | 9.540  | 0.00 | 0.00 |
| ATOM | 2715 | 2HG1 | ILE | 171 | 19.520 | 48.402 | 9.778  | 0.00 | 0.00 |
| ATOM | 2716 | 3HG1 | ILE | 171 | 20.080 | 47.478 | 8.609  | 0.00 | 0.00 |
| ATOM | 2717 | CD1  | ILE | 171 | 20.017 | 46.568 | 10.348 | 0.00 | 0.00 |
| ATOM | 2718 | 1HD1 | ILE | 171 | 20.063 | 46.308 | 10.601 | 0.00 | 0.00 |
| ATOM | 2719 | 2HD1 | ILE | 171 | 19.847 | 46.340 | 10.577 | 0.00 | 0.00 |
| ATOM | 2720 | 3HD1 | ILE | 171 | 19.957 | 46.195 | 10.438 | 0.00 | 0.00 |
| ATOM | 2721 | C    | ILE | 171 | 23.137 | 50.181 | 8.528  | 0.00 | 0.00 |
| ATOM | 2722 | O    | ILE | 171 | 23.385 | 51.182 | 9.170  | 0.00 | 0.00 |
| ATOM | 2723 | N    | ALA | 172 | 24.053 | 49.628 | 7.740  | 0.00 | 0.00 |
| ATOM | 2724 | H    | ALA | 172 | 23.797 | 48.832 | 7.204  | 0.00 | 0.00 |
| ATOM | 2725 | CA   | ALA | 172 | 25.384 | 50.207 | 7.548  | 0.00 | 0.00 |
| ATOM | 2726 | HA   | ALA | 172 | 25.812 | 50.379 | 8.523  | 0.00 | 0.00 |
| ATOM | 2727 | CB   | ALA | 172 | 26.273 | 49.205 | 6.833  | 0.00 | 0.00 |
| ATOM | 2728 | HB1  | ALA | 172 | 26.365 | 48.954 | 6.503  | 0.00 | 0.00 |
| ATOM | 2729 | HB2  | ALA | 172 | 26.646 | 49.110 | 6.657  | 0.00 | 0.00 |
| ATOM | 2730 | HB3  | ALA | 172 | 26.473 | 48.839 | 6.828  | 0.00 | 0.00 |
| ATOM | 2731 | C    | ALA | 172 | 25.327 | 51.571 | 6.843  | 0.00 | 0.00 |
| ATOM | 2732 | O    | ALA | 172 | 26.071 | 52.472 | 7.199  | 0.00 | 0.00 |
| ATOM | 2733 | N    | ARG | 173 | 24.381 | 51.774 | 5.925  | 0.00 | 0.00 |
| ATOM | 2734 | H    | ARG | 173 | 23.879 | 50.974 | 5.616  | 0.00 | 0.00 |
| ATOM | 2735 | CA   | ARG | 173 | 24.044 | 53.077 | 5.337  | 0.00 | 0.00 |
| ATOM | 2736 | HA   | ARG | 173 | 24.956 | 53.528 | 4.971  | 0.00 | 0.00 |
| ATOM | 2737 | CB   | ARG | 173 | 23.089 | 52.865 | 4.162  | 0.00 | 0.00 |
| ATOM | 2738 | HB2  | ARG | 173 | 23.485 | 52.093 | 3.545  | 0.00 | 0.00 |
| ATOM | 2739 | HB3  | ARG | 173 | 22.140 | 52.543 | 4.519  | 0.00 | 0.00 |
| ATOM | 2740 | CG   | ARG | 173 | 22.894 | 54.095 | 3.315  | 0.00 | 0.00 |
| ATOM | 2741 | HG2  | ARG | 173 | 22.525 | 54.879 | 3.922  | 0.00 | 0.00 |
| ATOM | 2742 | HG3  | ARG | 173 | 23.826 | 54.394 | 2.923  | 0.00 | 0.00 |
| ATOM | 2743 | CD   | ARG | 173 | 21.923 | 53.878 | 2.171  | 0.00 | 0.00 |
| ATOM | 2744 | HD2  | ARG | 173 | 20.999 | 53.602 | 2.572  | 0.00 | 0.00 |
| ATOM | 2745 | HD3  | ARG | 173 | 21.798 | 54.781 | 1.653  | 0.00 | 0.00 |
| ATOM | 2746 | NE   | ARG | 173 | 22.372 | 52.878 | 1.258  | 0.00 | 0.00 |
| ATOM | 2747 | HE   | ARG | 173 | 23.240 | 52.496 | 1.324  | 0.00 | 0.00 |
| ATOM | 2748 | CZ   | ARG | 173 | 21.779 | 52.387 | 0.374  | 0.00 | 0.00 |
| ATOM | 2749 | NH1  | ARG | 173 | 20.650 | 52.770 | 0.100  | 0.00 | 0.00 |
| ATOM | 2750 | 1HH1 | ARG | 173 | 20.187 | 53.472 | 0.552  | 0.00 | 0.00 |
| ATOM | 2751 | 2HH1 | ARG | 173 | 20.253 | 52.365 | -0.588 | 0.00 | 0.00 |
| ATOM | 2752 | NH2  | ARG | 173 | 22.337 | 51.470 | -0.250 | 0.00 | 0.00 |
| ATOM | 2753 | 1HH2 | ARG | 173 | 23.203 | 51.159 | -0.005 | 0.00 | 0.00 |
| ATOM | 2754 | 2HH2 | ARG | 173 | 21.916 | 51.096 | -0.922 | 0.00 | 0.00 |
| ATOM | 2755 | C    | ARG | 173 | 23.468 | 54.047 | 6.360  | 0.00 | 0.00 |
| ATOM | 2756 | O    | ARG | 173 | 23.867 | 55.198 | 6.387  | 0.00 | 0.00 |
| ATOM | 2757 | N    | TRP | 174 | 22.600 | 53.597 | 7.257  | 0.00 | 0.00 |
| ATOM | 2758 | H    | TRP | 174 | 22.285 | 52.659 | 7.169  | 0.00 | 0.00 |
| ATOM | 2759 | CA   | TRP | 174 | 22.083 | 54.406 | 8.358  | 0.00 | 0.00 |
| ATOM | 2760 | HA   | TRP | 174 | 21.637 | 55.302 | 7.946  | 0.00 | 0.00 |
| ATOM | 2761 | CB   | TRP | 174 | 20.974 | 53.650 | 9.086  | 0.00 | 0.00 |
| ATOM | 2762 | HB2  | TRP | 174 | 20.246 | 53.337 | 8.363  | 0.00 | 0.00 |
| ATOM | 2763 | HB3  | TRP | 174 | 21.375 | 52.764 | 9.538  | 0.00 | 0.00 |
| ATOM | 2764 | CG   | TRP | 174 | 20.266 | 54.417 | 10.148 | 0.00 | 0.00 |
| ATOM | 2765 | CD1  | TRP | 174 | 19.188 | 55.174 | 9.972  | 0.00 | 0.00 |
| ATOM | 2766 | HD1  | TRP | 174 | 18.708 | 55.314 | 9.040  | 0.00 | 0.00 |
| ATOM | 2767 | NE1  | TRP | 174 | 18.807 | 55.732 | 11.156 | 0.00 | 0.00 |
| ATOM | 2768 | HE1  | TRP | 174 | 18.037 | 56.340 | 11.255 | 0.00 | 0.00 |
| ATOM | 2769 | CE2  | TRP | 174 | 19.630 | 55.365 | 12.161 | 0.00 | 0.00 |
| ATOM | 2770 | CZ2  | TRP | 174 | 19.669 | 55.682 | 13.505 | 0.00 | 0.00 |
| ATOM | 2771 | HZ2  | TRP | 174 | 18.947 | 56.335 | 13.923 | 0.00 | 0.00 |
| ATOM | 2772 | CH2  | TRP | 174 | 20.666 | 55.141 | 14.283 | 0.00 | 0.00 |
| ATOM | 2773 | HH2  | TRP | 174 | 20.717 | 55.388 | 15.310 | 0.00 | 0.00 |
| ATOM | 2774 | CZ3  | TRP | 174 | 21.598 | 54.287 | 13.716 | 0.00 | 0.00 |
| ATOM | 2775 | HZ3  | TRP | 174 | 22.356 | 53.872 | 14.317 | 0.00 | 0.00 |
| ATOM | 2776 | CE3  | TRP | 174 | 21.543 | 53.966 | 12.369 | 0.00 | 0.00 |
| ATOM | 2777 | HE3  | TRP | 174 | 22.251 | 53.300 | 11.944 | 0.00 | 0.00 |
| ATOM | 2778 | CD2  | TRP | 174 | 20.570 | 54.511 | 11.551 | 0.00 | 0.00 |
| ATOM | 2779 | C    | TRP | 174 | 23.195 | 54.863 | 9.310  | 0.00 | 0.00 |
| ATOM | 2780 | O    | TRP | 174 | 23.218 | 56.020 | 9.691  | 0.00 | 0.00 |
| ATOM | 2781 | N    | ILE | 175 | 24.164 | 54.005 | 9.631  | 0.00 | 0.00 |
| ATOM | 2782 | H    | ILE | 175 | 24.070 | 53.065 | 9.315  | 0.00 | 0.00 |
| ATOM | 2783 | CA   | ILE | 175 | 25.335 | 54.364 | 10.438 | 0.00 | 0.00 |
| ATOM | 2784 | HA   | ILE | 175 | 24.983 | 54.900 | 11.309 | 0.00 | 0.00 |
| ATOM | 2785 | CB   | ILE | 175 | 26.069 | 53.107 | 10.940 | 0.00 | 0.00 |
| ATOM | 2786 | HB   | ILE | 175 | 26.314 | 52.500 | 10.089 | 0.00 | 0.00 |
| ATOM | 2787 | CG2  | ILE | 175 | 27.367 | 53.467 | 11.661 | 0.00 | 0.00 |
| ATOM | 2788 | 1HG2 | ILE | 175 | 27.821 | 53.550 | 11.616 | 0.00 | 0.00 |
| ATOM | 2789 | 2HG2 | ILE | 175 | 27.576 | 53.754 | 11.917 | 0.00 | 0.00 |
| ATOM | 2790 | 3HG2 | ILE | 175 | 27.694 | 53.340 | 11.977 | 0.00 | 0.00 |
| ATOM | 2791 | CG1  | ILE | 175 | 25.186 | 52.279 | 11.884 | 0.00 | 0.00 |
| ATOM | 2792 | 2HG1 | ILE | 175 | 25.072 | 52.780 | 12.799 | 0.00 | 0.00 |
| ATOM | 2793 | 3HG1 | ILE | 175 | 24.218 | 52.168 | 11.463 | 0.00 | 0.00 |
| ATOM | 2794 | CD1  | ILE | 175 | 25.681 | 50.893 | 12.159 | 0.00 | 0.00 |
| ATOM | 2795 | 1HD1 | ILE | 175 | 25.799 | 50.550 | 12.147 | 0.00 | 0.00 |

|      |      |      |     |     |        |        |        |      |      |
|------|------|------|-----|-----|--------|--------|--------|------|------|
| ATOM | 2796 | ZHD1 | ILE | 175 | 25.860 | 50.580 | 12.268 | 0.00 | 0.00 |
| ATOM | 2797 | 3HD1 | ILE | 175 | 25.717 | 50.548 | 12.268 | 0.00 | 0.00 |
| ATOM | 2798 | C    | ILE | 175 | 26.257 | 55.335 | 9.689  | 0.00 | 0.00 |
| ATOM | 2799 | O    | ILE | 175 | 26.733 | 56.292 | 10.280 | 0.00 | 0.00 |
| ATOM | 2800 | N    | ALA | 176 | 26.461 | 55.168 | 8.383  | 0.00 | 0.00 |
| ATOM | 2801 | H    | ALA | 176 | 26.075 | 54.361 | 7.941  | 0.00 | 0.00 |
| ATOM | 2802 | CA   | ALA | 176 | 27.221 | 56.105 | 7.558  | 0.00 | 0.00 |
| ATOM | 2803 | HA   | ALA | 176 | 28.212 | 56.213 | 7.974  | 0.00 | 0.00 |
| ATOM | 2804 | CB   | ALA | 176 | 27.366 | 55.530 | 6.150  | 0.00 | 0.00 |
| ATOM | 2805 | HB1  | ALA | 176 | 27.344 | 55.194 | 5.887  | 0.00 | 0.00 |
| ATOM | 2806 | HB2  | ALA | 176 | 27.256 | 55.536 | 5.729  | 0.00 | 0.00 |
| ATOM | 2807 | HB3  | ALA | 176 | 27.623 | 55.444 | 5.797  | 0.00 | 0.00 |
| ATOM | 2808 | C    | ALA | 176 | 26.583 | 57.502 | 7.534  | 0.00 | 0.00 |
| ATOM | 2809 | O    | ALA | 176 | 27.264 | 58.491 | 7.739  | 0.00 | 0.00 |
| ATOM | 2810 | N    | GLN | 177 | 25.267 | 57.584 | 7.401  | 0.00 | 0.00 |
| ATOM | 2811 | H    | GLN | 177 | 24.771 | 56.741 | 7.212  | 0.00 | 0.00 |
| ATOM | 2812 | CA   | GLN | 177 | 24.495 | 58.826 | 7.473  | 0.00 | 0.00 |
| ATOM | 2813 | HA   | GLN | 177 | 24.953 | 59.562 | 6.834  | 0.00 | 0.00 |
| ATOM | 2814 | CB   | GLN | 177 | 23.084 | 58.568 | 6.955  | 0.00 | 0.00 |
| ATOM | 2815 | HB2  | GLN | 177 | 22.683 | 57.709 | 7.453  | 0.00 | 0.00 |
| ATOM | 2816 | HB3  | GLN | 177 | 22.463 | 59.408 | 7.191  | 0.00 | 0.00 |
| ATOM | 2817 | CG   | GLN | 177 | 23.045 | 58.349 | 5.452  | 0.00 | 0.00 |
| ATOM | 2818 | HG2  | GLN | 177 | 23.355 | 59.228 | 4.972  | 0.00 | 0.00 |
| ATOM | 2819 | HG3  | GLN | 177 | 23.714 | 57.586 | 5.175  | 0.00 | 0.00 |
| ATOM | 2820 | CD   | GLN | 177 | 21.710 | 57.990 | 4.920  | 0.00 | 0.00 |
| ATOM | 2821 | OE1  | GLN | 177 | 20.801 | 57.767 | 5.517  | 0.00 | 0.00 |
| ATOM | 2822 | NE2  | GLN | 177 | 21.544 | 57.908 | 3.762  | 0.00 | 0.00 |
| ATOM | 2823 | 1HE2 | GLN | 177 | 20.672 | 57.688 | 3.411  | 0.00 | 0.00 |
| ATOM | 2824 | ZHE2 | GLN | 177 | 22.278 | 58.098 | 3.258  | 0.00 | 0.00 |
| ATOM | 2825 | C    | GLN | 177 | 24.462 | 59.440 | 8.875  | 0.00 | 0.00 |
| ATOM | 2826 | O    | GLN | 177 | 24.336 | 60.627 | 9.006  | 0.00 | 0.00 |
| ATOM | 2827 | N    | ARG | 178 | 24.655 | 58.659 | 9.921  | 0.00 | 0.00 |
| ATOM | 2828 | H    | ARG | 178 | 24.678 | 57.693 | 9.738  | 0.00 | 0.00 |
| ATOM | 2829 | CA   | ARG | 178 | 24.835 | 59.090 | 11.318 | 0.00 | 0.00 |
| ATOM | 2830 | HA   | ARG | 178 | 24.212 | 59.952 | 11.485 | 0.00 | 0.00 |
| ATOM | 2831 | CB   | ARG | 178 | 24.345 | 57.964 | 12.236 | 0.00 | 0.00 |
| ATOM | 2832 | HB2  | ARG | 178 | 23.467 | 57.533 | 11.803 | 0.00 | 0.00 |
| ATOM | 2833 | HB3  | ARG | 178 | 25.089 | 57.203 | 12.274 | 0.00 | 0.00 |
| ATOM | 2834 | CG   | ARG | 178 | 23.982 | 58.371 | 13.656 | 0.00 | 0.00 |
| ATOM | 2835 | HG2  | ARG | 178 | 24.591 | 58.285 | 14.187 | 0.00 | 0.00 |
| ATOM | 2836 | HG3  | ARG | 178 | 23.753 | 59.153 | 13.762 | 0.00 | 0.00 |
| ATOM | 2837 | CD   | ARG | 178 | 23.085 | 57.793 | 14.217 | 0.00 | 0.00 |
| ATOM | 2838 | HD2  | ARG | 178 | 22.470 | 57.930 | 13.753 | 0.00 | 0.00 |
| ATOM | 2839 | HD3  | ARG | 178 | 23.299 | 57.021 | 14.017 | 0.00 | 0.00 |
| ATOM | 2840 | NE   | ARG | 178 | 22.745 | 58.025 | 15.599 | 0.00 | 0.00 |
| ATOM | 2841 | HE   | ARG | 178 | 23.380 | 57.721 | 16.255 | 0.00 | 0.00 |
| ATOM | 2842 | CZ   | ARG | 178 | 21.673 | 58.526 | 16.082 | 0.00 | 0.00 |
| ATOM | 2843 | NH1  | ARG | 178 | 21.500 | 58.571 | 17.330 | 0.00 | 0.00 |
| ATOM | 2844 | 1HH1 | ARG | 178 | 22.177 | 58.222 | 17.922 | 0.00 | 0.00 |
| ATOM | 2845 | ZHH1 | ARG | 178 | 20.683 | 58.956 | 17.688 | 0.00 | 0.00 |
| ATOM | 2846 | NH2  | ARG | 178 | 20.757 | 58.984 | 15.366 | 0.00 | 0.00 |
| ATOM | 2847 | 1HH2 | ARG | 178 | 20.849 | 59.004 | 14.397 | 0.00 | 0.00 |
| ATOM | 2848 | ZHH2 | ARG | 178 | 19.976 | 59.362 | 15.786 | 0.00 | 0.00 |
| ATOM | 2849 | C    | ARG | 178 | 26.268 | 59.543 | 11.627 | 0.00 | 0.00 |
| ATOM | 2850 | O    | ARG | 178 | 26.548 | 59.982 | 12.696 | 0.00 | 0.00 |
| ATOM | 2851 | N    | GLY | 179 | 27.170 | 59.471 | 10.688 | 0.00 | 0.00 |
| ATOM | 2852 | H    | GLY | 179 | 26.862 | 59.093 | 9.846  | 0.00 | 0.00 |
| ATOM | 2853 | CA   | GLY | 179 | 28.548 | 59.949 | 10.736 | 0.00 | 0.00 |
| ATOM | 2854 | HA2  | GLY | 179 | 28.719 | 60.549 | 9.882  | 0.00 | 0.00 |
| ATOM | 2855 | HA3  | GLY | 179 | 28.686 | 60.561 | 11.594 | 0.00 | 0.00 |
| ATOM | 2856 | C    | GLY | 179 | 29.627 | 58.895 | 10.764 | 0.00 | 0.00 |
| ATOM | 2857 | O    | GLY | 179 | 30.776 | 59.242 | 10.905 | 0.00 | 0.00 |
| ATOM | 2858 | N    | GLY | 180 | 29.289 | 57.622 | 10.638 | 0.00 | 0.00 |
| ATOM | 2859 | H    | GLY | 180 | 28.330 | 57.410 | 10.514 | 0.00 | 0.00 |
| ATOM | 2860 | CA   | GLY | 180 | 30.207 | 56.503 | 10.833 | 0.00 | 0.00 |
| ATOM | 2861 | HA2  | GLY | 180 | 29.786 | 55.618 | 10.403 | 0.00 | 0.00 |
| ATOM | 2862 | HA3  | GLY | 180 | 31.135 | 56.691 | 10.334 | 0.00 | 0.00 |
| ATOM | 2863 | C    | GLY | 180 | 30.511 | 56.240 | 12.296 | 0.00 | 0.00 |
| ATOM | 2864 | O    | GLY | 180 | 30.159 | 57.019 | 13.156 | 0.00 | 0.00 |
| ATOM | 2865 | N    | TRP | 181 | 31.192 | 55.154 | 12.606 | 0.00 | 0.00 |
| ATOM | 2866 | H    | TRP | 181 | 31.528 | 54.577 | 11.876 | 0.00 | 0.00 |
| ATOM | 2867 | CA   | TRP | 181 | 31.466 | 54.754 | 13.982 | 0.00 | 0.00 |
| ATOM | 2868 | HA   | TRP | 181 | 30.532 | 54.741 | 14.508 | 0.00 | 0.00 |
| ATOM | 2869 | CB   | TRP | 181 | 32.015 | 53.332 | 14.012 | 0.00 | 0.00 |
| ATOM | 2870 | HB2  | TRP | 181 | 32.758 | 53.212 | 13.245 | 0.00 | 0.00 |
| ATOM | 2871 | HB3  | TRP | 181 | 32.506 | 53.172 | 14.956 | 0.00 | 0.00 |
| ATOM | 2872 | CG   | TRP | 181 | 30.984 | 52.272 | 13.877 | 0.00 | 0.00 |
| ATOM | 2873 | CD1  | TRP | 181 | 30.876 | 51.422 | 12.852 | 0.00 | 0.00 |
| ATOM | 2874 | HD1  | TRP | 181 | 31.515 | 51.416 | 12.002 | 0.00 | 0.00 |
| ATOM | 2875 | NE1  | TRP | 181 | 29.831 | 50.565 | 13.067 | 0.00 | 0.00 |
| ATOM | 2876 | HE1  | TRP | 181 | 29.581 | 49.844 | 12.426 | 0.00 | 0.00 |
| ATOM | 2877 | CE2  | TRP | 181 | 29.214 | 50.811 | 14.257 | 0.00 | 0.00 |
| ATOM | 2878 | CZ2  | TRP | 181 | 28.136 | 50.219 | 14.906 | 0.00 | 0.00 |
| ATOM | 2879 | HZ2  | TRP | 181 | 27.631 | 49.392 | 14.469 | 0.00 | 0.00 |
| ATOM | 2880 | CH2  | TRP | 181 | 27.717 | 50.730 | 16.128 | 0.00 | 0.00 |
| ATOM | 2881 | HH2  | TRP | 181 | 26.889 | 50.292 | 16.632 | 0.00 | 0.00 |
| ATOM | 2882 | CZ3  | TRP | 181 | 28.389 | 51.815 | 16.684 | 0.00 | 0.00 |
| ATOM | 2883 | HZ3  | TRP | 181 | 28.070 | 52.195 | 17.623 | 0.00 | 0.00 |
| ATOM | 2884 | CE3  | TRP | 181 | 29.473 | 52.399 | 16.027 | 0.00 | 0.00 |
| ATOM | 2885 | HE3  | TRP | 181 | 29.976 | 53.225 | 16.473 | 0.00 | 0.00 |
| ATOM | 2886 | CD2  | TRP | 181 | 29.913 | 51.918 | 14.792 | 0.00 | 0.00 |
| ATOM | 2887 | C    | TRP | 181 | 32.345 | 55.717 | 14.758 | 0.00 | 0.00 |
| ATOM | 2888 | O    | TRP | 181 | 32.294 | 55.725 | 15.941 | 0.00 | 0.00 |
| ATOM | 2889 | N    | VAL | 182 | 33.062 | 56.595 | 14.126 | 0.00 | 0.00 |
| ATOM | 2890 | H    | VAL | 182 | 33.067 | 56.530 | 13.163 | 0.00 | 0.00 |
| ATOM | 2891 | CA   | VAL | 182 | 33.787 | 57.686 | 14.766 | 0.00 | 0.00 |
| ATOM | 2892 | HA   | VAL | 182 | 34.276 | 57.287 | 15.607 | 0.00 | 0.00 |
| ATOM | 2893 | CB   | VAL | 182 | 34.848 | 58.230 | 13.869 | 0.00 | 0.00 |
| ATOM | 2894 | HB   | VAL | 182 | 35.308 | 59.001 | 14.367 | 0.00 | 0.00 |
| ATOM | 2895 | CG1  | VAL | 182 | 35.852 | 57.238 | 13.576 | 0.00 | 0.00 |
| ATOM | 2896 | 1HG1 | VAL | 182 | 36.459 | 57.491 | 13.080 | 0.00 | 0.00 |
| ATOM | 2897 | ZHG1 | VAL | 182 | 35.614 | 56.551 | 13.228 | 0.00 | 0.00 |
| ATOM | 2898 | 3HG1 | VAL | 182 | 36.242 | 56.970 | 14.225 | 0.00 | 0.00 |
| ATOM | 2899 | CG2  | VAL | 182 | 34.361 | 58.766 | 12.623 | 0.00 | 0.00 |
| ATOM | 2900 | 1HG2 | VAL | 182 | 34.177 | 58.642 | 12.196 | 0.00 | 0.00 |



|      |      |      |     |     |        |        |        |      |      |
|------|------|------|-----|-----|--------|--------|--------|------|------|
| ATOM | 2901 | ZHG2 | VAL | 182 | 34.517 | 58.988 | 12.296 | 0.00 | 0.00 |
| ATOM | 2902 | 3HG2 | VAL | 182 | 34.053 | 59.079 | 12.463 | 0.00 | 0.00 |
| ATOM | 2903 | C    | VAL | 182 | 32.924 | 58.812 | 15.308 | 0.00 | 0.00 |
| ATOM | 2904 | O    | VAL | 182 | 33.431 | 59.625 | 16.045 | 0.00 | 0.00 |
| ATOM | 2905 | N    | ALA | 183 | 31.650 | 58.874 | 14.979 | 0.00 | 0.00 |
| ATOM | 2906 | H    | ALA | 183 | 31.322 | 58.203 | 14.337 | 0.00 | 0.00 |
| ATOM | 2907 | CA   | ALA | 183 | 30.723 | 59.889 | 15.455 | 0.00 | 0.00 |
| ATOM | 2908 | HA   | ALA | 183 | 31.133 | 60.350 | 16.327 | 0.00 | 0.00 |
| ATOM | 2909 | CB   | ALA | 183 | 30.604 | 60.939 | 14.386 | 0.00 | 0.00 |
| ATOM | 2910 | HB1  | ALA | 183 | 30.635 | 61.157 | 14.080 | 0.00 | 0.00 |
| ATOM | 2911 | HB2  | ALA | 183 | 30.494 | 61.176 | 14.118 | 0.00 | 0.00 |
| ATOM | 2912 | HB3  | ALA | 183 | 30.598 | 61.255 | 14.189 | 0.00 | 0.00 |
| ATOM | 2913 | C    | ALA | 183 | 29.340 | 59.379 | 15.867 | 0.00 | 0.00 |
| ATOM | 2914 | O    | ALA | 183 | 28.668 | 60.034 | 16.635 | 0.00 | 0.00 |
| ATOM | 2915 | N    | ALA | 184 | 28.884 | 58.241 | 15.385 | 0.00 | 0.00 |
| ATOM | 2916 | H    | ALA | 184 | 29.454 | 57.772 | 14.735 | 0.00 | 0.00 |
| ATOM | 2917 | CA   | ALA | 184 | 27.528 | 57.749 | 15.559 | 0.00 | 0.00 |
| ATOM | 2918 | HA   | ALA | 184 | 26.857 | 58.507 | 15.227 | 0.00 | 0.00 |
| ATOM | 2919 | CB   | ALA | 184 | 27.347 | 56.549 | 14.675 | 0.00 | 0.00 |
| ATOM | 2920 | HB1  | ALA | 184 | 28.026 | 55.789 | 14.936 | 0.00 | 0.00 |
| ATOM | 2921 | HB2  | ALA | 184 | 26.362 | 56.170 | 14.783 | 0.00 | 0.00 |
| ATOM | 2922 | HB3  | ALA | 184 | 27.498 | 56.809 | 13.663 | 0.00 | 0.00 |
| ATOM | 2923 | C    | ALA | 184 | 27.125 | 57.426 | 16.987 | 0.00 | 0.00 |
| ATOM | 2924 | O    | ALA | 184 | 25.962 | 57.481 | 17.300 | 0.00 | 0.00 |
| ATOM | 2925 | N    | LEU | 185 | 28.052 | 57.109 | 17.855 | 0.00 | 0.00 |
| ATOM | 2926 | H    | LEU | 185 | 28.986 | 57.097 | 17.541 | 0.00 | 0.00 |
| ATOM | 2927 | CA   | LEU | 185 | 27.805 | 56.820 | 19.252 | 0.00 | 0.00 |
| ATOM | 2928 | HA   | LEU | 185 | 26.798 | 56.489 | 19.337 | 0.00 | 0.00 |
| ATOM | 2929 | CB   | LEU | 185 | 28.711 | 55.689 | 19.687 | 0.00 | 0.00 |
| ATOM | 2930 | HB2  | LEU | 185 | 28.871 | 55.230 | 19.186 | 0.00 | 0.00 |
| ATOM | 2931 | HB3  | LEU | 185 | 29.331 | 55.898 | 19.891 | 0.00 | 0.00 |
| ATOM | 2932 | CG   | LEU | 185 | 28.606 | 54.871 | 20.503 | 0.00 | 0.00 |
| ATOM | 2933 | HG   | LEU | 185 | 28.742 | 55.376 | 20.783 | 0.00 | 0.00 |
| ATOM | 2934 | CD1  | LEU | 185 | 27.906 | 54.305 | 20.756 | 0.00 | 0.00 |
| ATOM | 2935 | 1HD1 | LEU | 185 | 27.669 | 54.225 | 20.750 | 0.00 | 0.00 |
| ATOM | 2936 | 2HD1 | LEU | 185 | 27.714 | 54.098 | 20.990 | 0.00 | 0.00 |
| ATOM | 2937 | 3HD1 | LEU | 185 | 27.836 | 54.186 | 20.731 | 0.00 | 0.00 |
| ATOM | 2938 | CD2  | LEU | 185 | 29.057 | 53.875 | 20.720 | 0.00 | 0.00 |
| ATOM | 2939 | 1HD2 | LEU | 185 | 28.975 | 53.254 | 20.319 | 0.00 | 0.00 |
| ATOM | 2940 | 2HD2 | LEU | 185 | 28.944 | 53.465 | 21.277 | 0.00 | 0.00 |
| ATOM | 2941 | 3HD2 | LEU | 185 | 29.588 | 54.178 | 20.738 | 0.00 | 0.00 |
| ATOM | 2942 | C    | LEU | 185 | 27.929 | 58.038 | 20.137 | 0.00 | 0.00 |
| ATOM | 2943 | O    | LEU | 185 | 27.371 | 58.075 | 21.182 | 0.00 | 0.00 |
| ATOM | 2944 | N    | ASN | 186 | 28.596 | 59.060 | 19.708 | 0.00 | 0.00 |
| ATOM | 2945 | H    | ASN | 186 | 29.009 | 58.970 | 18.840 | 0.00 | 0.00 |
| ATOM | 2946 | CA   | ASN | 186 | 28.723 | 60.320 | 20.401 | 0.00 | 0.00 |
| ATOM | 2947 | HA   | ASN | 186 | 28.773 | 60.130 | 21.423 | 0.00 | 0.00 |
| ATOM | 2948 | CB   | ASN | 186 | 29.994 | 60.950 | 19.992 | 0.00 | 0.00 |
| ATOM | 2949 | HB2  | ASN | 186 | 30.398 | 60.521 | 19.651 | 0.00 | 0.00 |
| ATOM | 2950 | HB3  | ASN | 186 | 30.033 | 61.521 | 19.539 | 0.00 | 0.00 |
| ATOM | 2951 | CG   | ASN | 186 | 30.710 | 61.395 | 20.640 | 0.00 | 0.00 |
| ATOM | 2952 | OD1  | ASN | 186 | 30.642 | 61.152 | 21.578 | 0.00 | 0.00 |
| ATOM | 2953 | ND2  | ASN | 186 | 31.414 | 62.054 | 20.160 | 0.00 | 0.00 |
| ATOM | 2954 | 1HD2 | ASN | 186 | 31.879 | 62.345 | 20.578 | 0.00 | 0.00 |
| ATOM | 2955 | 2HD2 | ASN | 186 | 31.495 | 62.258 | 19.395 | 0.00 | 0.00 |
| ATOM | 2956 | C    | ASN | 186 | 27.551 | 61.242 | 20.210 | 0.00 | 0.00 |
| ATOM | 2957 | O    | ASN | 186 | 27.462 | 62.170 | 20.768 | 0.00 | 0.00 |
| ATOM | 2958 | N    | LEU | 187 | 26.642 | 60.977 | 19.441 | 0.00 | 0.00 |
| ATOM | 2959 | H    | LEU | 187 | 26.791 | 60.225 | 19.017 | 0.00 | 0.00 |
| ATOM | 2960 | CA   | LEU | 187 | 25.448 | 61.691 | 19.167 | 0.00 | 0.00 |
| ATOM | 2961 | HA   | LEU | 187 | 25.589 | 62.656 | 19.367 | 0.00 | 0.00 |
| ATOM | 2962 | CB   | LEU | 187 | 25.106 | 61.566 | 17.796 | 0.00 | 0.00 |
| ATOM | 2963 | HB2  | LEU | 187 | 25.809 | 61.643 | 17.312 | 0.00 | 0.00 |
| ATOM | 2964 | HB3  | LEU | 187 | 24.821 | 60.804 | 17.623 | 0.00 | 0.00 |
| ATOM | 2965 | CG   | LEU | 187 | 24.230 | 62.331 | 17.263 | 0.00 | 0.00 |
| ATOM | 2966 | HG   | LEU | 187 | 23.855 | 62.265 | 17.621 | 0.00 | 0.00 |
| ATOM | 2967 | CD1  | LEU | 187 | 24.291 | 63.179 | 17.025 | 0.00 | 0.00 |
| ATOM | 2968 | 1HD1 | LEU | 187 | 24.420 | 63.440 | 17.042 | 0.00 | 0.00 |
| ATOM | 2969 | 2HD1 | LEU | 187 | 24.093 | 63.428 | 17.013 | 0.00 | 0.00 |
| ATOM | 2970 | 3HD1 | LEU | 187 | 24.395 | 63.290 | 16.849 | 0.00 | 0.00 |
| ATOM | 2971 | CD2  | LEU | 187 | 23.770 | 62.348 | 16.416 | 0.00 | 0.00 |
| ATOM | 2972 | 1HD2 | LEU | 187 | 23.634 | 62.588 | 16.116 | 0.00 | 0.00 |
| ATOM | 2973 | 2HD2 | LEU | 187 | 23.628 | 62.209 | 16.434 | 0.00 | 0.00 |
| ATOM | 2974 | 3HD2 | LEU | 187 | 23.699 | 62.270 | 16.088 | 0.00 | 0.00 |
| ATOM | 2975 | C    | LEU | 187 | 24.392 | 61.276 | 19.980 | 0.00 | 0.00 |
| ATOM | 2976 | O    | LEU | 187 | 24.073 | 60.286 | 20.089 | 0.00 | 0.00 |

END

DATASET 58

HEADER APOPTOSIS 29-OCT-11 XXXX  
 TITLE 3D MODEL OF BAK IN COMPLEX WITH THE BH3 DOMAIN OF BIM  
 COMPND MOLECULE: APOPTOSIS REGULATOR BAK;  
 COMPND 2 SYNONYM: BCL-2 HOMOLOGOUS ANTAGONIST/KILLER, BCL-2- LIKE 7  
 COMPND 3 PROTEIN;  
 SOURCE MOLECULE 1 (RESIDUES 1-24): BIM;  
 SOURCE 2 NCBI ACCESSION: Q43521;  
 SOURCE 3 ORGANISM\_SCIENTIFIC: HOMO SAPIENS;  
 SOURCE 4 ORGANISM\_COMMON: HUMAN;  
 SOURCE 5 MOLECULE 2 (RESIDUES 25-187): BAK;  
 SOURCE 6 NCBI ACCESSION: Q16611;  
 SOURCE 7 ORGANISM\_SCIENTIFIC: HOMO SAPIENS;  
 SOURCE 8 ORGANISM\_COMMON: HUMAN;  
 KEYWDS HETERODIMER, APOPTOSIS  
 EXPDTA THEORETICAL MODEL  
 JRNL AUTH Y-P PANG, H DAI, A SMITH, XW MENG, PA SCHNEIDER, SH KAUFMANN  
 JRNL TITL BAK CONFORMATIONAL CHANGES INDUCED BY LIGAND BINDING:  
 JRNL TITL 2 INSIGHT INTO BH3 DOMAIN BINDING AND BAK HOMO-OLIGOMERIZATION  
 JRNL REF SCIENTIFIC REPORTS, SUBMITTED  
 REMARK 220 THIS IS AN AVERAGE OF CLUSTER 3 CONTAINING 250 SIMILAR  
 REMARK 220 CONFORMERS IDENTIFIED BY CLUSTER ANALYSIS OF 80 10-NS MOLECULAR  
 REMARK 220 DYNAMICS SIMULATIONS OF BAK\*BIM USING PMEMD WITH THE  
 REMARK 220 FF99SB FORCE FIELD. NO ENERGY MINIMIZATION IS APPLIED  
 REMARK 220 TO THIS AVERAGE STRUCTURE.  
 MOL 1  
 ATOM 1 N ARG 1 3.606 28.046 20.651 0.00 0.00

|      |     |      |     |   |        |        |        |      |      |
|------|-----|------|-----|---|--------|--------|--------|------|------|
| ATOM | 2   | H    | ARG | 1 | 4.039  | 28.188 | 20.297 | 0.00 | 0.00 |
| ATOM | 3   | CA   | ARG | 1 | 3.373  | 28.591 | 21.654 | 0.00 | 0.00 |
| ATOM | 4   | HA   | ARG | 1 | 3.803  | 28.184 | 22.287 | 0.00 | 0.00 |
| ATOM | 5   | CB   | ARG | 1 | 2.081  | 28.344 | 21.899 | 0.00 | 0.00 |
| ATOM | 6   | HB2  | ARG | 1 | 1.806  | 27.434 | 21.944 | 0.00 | 0.00 |
| ATOM | 7   | HB3  | ARG | 1 | 1.924  | 28.666 | 22.668 | 0.00 | 0.00 |
| ATOM | 8   | CG   | ARG | 1 | 1.343  | 28.842 | 21.093 | 0.00 | 0.00 |
| ATOM | 9   | HG2  | ARG | 1 | 1.584  | 29.721 | 21.070 | 0.00 | 0.00 |
| ATOM | 10  | HG3  | ARG | 1 | 1.463  | 28.532 | 20.337 | 0.00 | 0.00 |
| ATOM | 11  | CD   | ARG | 1 | 0.093  | 28.571 | 21.354 | 0.00 | 0.00 |
| ATOM | 12  | HD2  | ARG | 1 | -0.149 | 27.785 | 21.386 | 0.00 | 0.00 |
| ATOM | 13  | HD3  | ARG | 1 | 0.003  | 28.831 | 22.036 | 0.00 | 0.00 |
| ATOM | 14  | NE   | ARG | 1 | -0.652 | 28.991 | 20.686 | 0.00 | 0.00 |
| ATOM | 15  | HE   | ARG | 1 | -0.780 | 29.033 | 20.306 | 0.00 | 0.00 |
| ATOM | 16  | CZ   | ARG | 1 | -1.189 | 29.324 | 20.526 | 0.00 | 0.00 |
| ATOM | 17  | NH1  | ARG | 1 | -1.118 | 29.322 | 20.952 | 0.00 | 0.00 |
| ATOM | 18  | 1HH1 | ARG | 1 | -0.649 | 29.064 | 21.429 | 0.00 | 0.00 |
| ATOM | 19  | 2HH1 | ARG | 1 | -1.548 | 29.585 | 20.815 | 0.00 | 0.00 |
| ATOM | 20  | NH2  | ARG | 1 | -1.824 | 29.680 | 19.922 | 0.00 | 0.00 |
| ATOM | 21  | 1HH2 | ARG | 1 | -1.897 | 29.701 | 19.574 | 0.00 | 0.00 |
| ATOM | 22  | 2HH2 | ARG | 1 | -2.222 | 29.936 | 19.802 | 0.00 | 0.00 |
| ATOM | 23  | C    | ARG | 1 | 3.858  | 29.895 | 21.648 | 0.00 | 0.00 |
| ATOM | 24  | O    | ARG | 1 | 3.880  | 30.451 | 20.783 | 0.00 | 0.00 |
| ATOM | 25  | N    | PRO | 2 | 4.220  | 30.425 | 22.586 | 0.00 | 0.00 |
| ATOM | 26  | CD   | PRO | 2 | 4.231  | 29.874 | 23.665 | 0.00 | 0.00 |
| ATOM | 27  | HD2  | PRO | 2 | 4.881  | 29.351 | 23.703 | 0.00 | 0.00 |
| ATOM | 28  | HD3  | PRO | 2 | 3.436  | 29.379 | 23.885 | 0.00 | 0.00 |
| ATOM | 29  | CG   | PRO | 2 | 4.459  | 30.807 | 24.443 | 0.00 | 0.00 |
| ATOM | 30  | HG2  | PRO | 2 | 5.027  | 30.680 | 24.888 | 0.00 | 0.00 |
| ATOM | 31  | HG3  | PRO | 2 | 3.803  | 30.842 | 24.837 | 0.00 | 0.00 |
| ATOM | 32  | CB   | PRO | 2 | 4.790  | 31.895 | 23.902 | 0.00 | 0.00 |
| ATOM | 33  | HB2  | PRO | 2 | 4.341  | 32.483 | 24.199 | 0.00 | 0.00 |
| ATOM | 34  | HB3  | PRO | 2 | 5.616  | 32.152 | 24.065 | 0.00 | 0.00 |
| ATOM | 35  | CA   | PRO | 2 | 4.553  | 31.692 | 22.673 | 0.00 | 0.00 |
| ATOM | 36  | HA   | PRO | 2 | 3.812  | 32.130 | 22.442 | 0.00 | 0.00 |
| ATOM | 37  | C    | PRO | 2 | 5.600  | 32.209 | 21.945 | 0.00 | 0.00 |
| ATOM | 38  | O    | PRO | 2 | 5.726  | 33.247 | 21.718 | 0.00 | 0.00 |
| ATOM | 39  | N    | GLU | 3 | 6.341  | 31.508 | 21.551 | 0.00 | 0.00 |
| ATOM | 40  | H    | GLU | 3 | 6.221  | 30.667 | 21.782 | 0.00 | 0.00 |
| ATOM | 41  | CA   | GLU | 3 | 7.392  | 31.878 | 20.836 | 0.00 | 0.00 |
| ATOM | 42  | HA   | GLU | 3 | 7.630  | 32.846 | 21.076 | 0.00 | 0.00 |
| ATOM | 43  | CB   | GLU | 3 | 8.496  | 31.122 | 21.226 | 0.00 | 0.00 |
| ATOM | 44  | HB2  | GLU | 3 | 9.279  | 31.560 | 20.826 | 0.00 | 0.00 |
| ATOM | 45  | HB3  | GLU | 3 | 8.635  | 31.198 | 22.219 | 0.00 | 0.00 |
| ATOM | 46  | CG   | GLU | 3 | 8.459  | 29.735 | 20.843 | 0.00 | 0.00 |
| ATOM | 47  | HG2  | GLU | 3 | 8.229  | 29.644 | 19.888 | 0.00 | 0.00 |
| ATOM | 48  | HG3  | GLU | 3 | 9.337  | 29.386 | 20.966 | 0.00 | 0.00 |
| ATOM | 49  | CD   | GLU | 3 | 7.610  | 28.917 | 21.548 | 0.00 | 0.00 |
| ATOM | 50  | OE1  | GLU | 3 | 7.009  | 28.308 | 21.186 | 0.00 | 0.00 |
| ATOM | 51  | OE2  | GLU | 3 | 7.546  | 28.862 | 22.449 | 0.00 | 0.00 |
| ATOM | 52  | C    | GLU | 3 | 7.157  | 31.861 | 19.420 | 0.00 | 0.00 |
| ATOM | 53  | O    | GLU | 3 | 7.962  | 32.265 | 18.741 | 0.00 | 0.00 |
| ATOM | 54  | N    | ILE | 4 | 6.061  | 31.437 | 18.950 | 0.00 | 0.00 |
| ATOM | 55  | H    | ILE | 4 | 5.436  | 31.120 | 19.548 | 0.00 | 0.00 |
| ATOM | 56  | CA   | ILE | 4 | 5.736  | 31.384 | 17.589 | 0.00 | 0.00 |
| ATOM | 57  | HA   | ILE | 4 | 6.548  | 31.003 | 17.141 | 0.00 | 0.00 |
| ATOM | 58  | CB   | ILE | 4 | 4.684  | 30.441 | 17.388 | 0.00 | 0.00 |
| ATOM | 59  | HB   | ILE | 4 | 4.881  | 29.594 | 17.940 | 0.00 | 0.00 |
| ATOM | 60  | CG2  | ILE | 4 | 3.469  | 30.916 | 17.814 | 0.00 | 0.00 |
| ATOM | 61  | 1HG2 | ILE | 4 | 3.157  | 31.344 | 17.863 | 0.00 | 0.00 |
| ATOM | 62  | 2HG2 | ILE | 4 | 3.024  | 30.861 | 17.745 | 0.00 | 0.00 |
| ATOM | 63  | 3HG2 | ILE | 4 | 3.330  | 30.883 | 18.149 | 0.00 | 0.00 |
| ATOM | 64  | CG1  | ILE | 4 | 4.571  | 30.058 | 16.064 | 0.00 | 0.00 |
| ATOM | 65  | 2HG1 | ILE | 4 | 3.981  | 30.087 | 15.830 | 0.00 | 0.00 |
| ATOM | 66  | 3HG1 | ILE | 4 | 4.905  | 30.448 | 15.698 | 0.00 | 0.00 |
| ATOM | 67  | CD1  | ILE | 4 | 4.773  | 29.072 | 15.519 | 0.00 | 0.00 |
| ATOM | 68  | 1HD1 | ILE | 4 | 4.828  | 28.908 | 15.238 | 0.00 | 0.00 |
| ATOM | 69  | 2HD1 | ILE | 4 | 4.952  | 28.780 | 15.460 | 0.00 | 0.00 |
| ATOM | 70  | 3HD1 | ILE | 4 | 4.687  | 28.802 | 15.440 | 0.00 | 0.00 |
| ATOM | 71  | C    | ILE | 4 | 5.476  | 32.689 | 16.918 | 0.00 | 0.00 |
| ATOM | 72  | O    | ILE | 4 | 5.692  | 32.828 | 15.788 | 0.00 | 0.00 |
| ATOM | 73  | N    | TRP | 5 | 5.108  | 33.669 | 17.618 | 0.00 | 0.00 |
| ATOM | 74  | H    | TRP | 5 | 4.960  | 33.484 | 18.535 | 0.00 | 0.00 |
| ATOM | 75  | CA   | TRP | 5 | 4.883  | 35.006 | 17.165 | 0.00 | 0.00 |
| ATOM | 76  | HA   | TRP | 5 | 4.944  | 35.019 | 16.124 | 0.00 | 0.00 |
| ATOM | 77  | CB   | TRP | 5 | 3.518  | 35.417 | 17.516 | 0.00 | 0.00 |
| ATOM | 78  | HB2  | TRP | 5 | 3.445  | 35.432 | 18.535 | 0.00 | 0.00 |
| ATOM | 79  | HB3  | TRP | 5 | 3.360  | 36.394 | 17.195 | 0.00 | 0.00 |
| ATOM | 80  | CG   | TRP | 5 | 2.445  | 34.617 | 16.978 | 0.00 | 0.00 |
| ATOM | 81  | CD1  | TRP | 5 | 1.718  | 33.935 | 17.528 | 0.00 | 0.00 |
| ATOM | 82  | HD1  | TRP | 5 | 1.829  | 33.875 | 18.420 | 0.00 | 0.00 |
| ATOM | 83  | NE1  | TRP | 5 | 0.831  | 33.316 | 16.781 | 0.00 | 0.00 |
| ATOM | 84  | HE1  | TRP | 5 | 0.209  | 32.743 | 17.010 | 0.00 | 0.00 |
| ATOM | 85  | CE2  | TRP | 5 | 0.929  | 33.585 | 15.699 | 0.00 | 0.00 |
| ATOM | 86  | CZ2  | TRP | 5 | 0.255  | 33.215 | 14.669 | 0.00 | 0.00 |
| ATOM | 87  | HZ2  | TRP | 5 | -0.514 | 32.593 | 14.635 | 0.00 | 0.00 |
| ATOM | 88  | CH2  | TRP | 5 | 0.594  | 33.664 | 13.685 | 0.00 | 0.00 |
| ATOM | 89  | HH2  | TRP | 5 | 0.081  | 33.394 | 12.893 | 0.00 | 0.00 |
| ATOM | 90  | CZ3  | TRP | 5 | 1.592  | 34.493 | 13.744 | 0.00 | 0.00 |
| ATOM | 91  | HZ3  | TRP | 5 | 1.840  | 34.842 | 12.994 | 0.00 | 0.00 |
| ATOM | 92  | CE3  | TRP | 5 | 2.259  | 34.865 | 14.785 | 0.00 | 0.00 |
| ATOM | 93  | HE3  | TRP | 5 | 3.018  | 35.500 | 14.813 | 0.00 | 0.00 |
| ATOM | 94  | CD2  | TRP | 5 | 1.950  | 34.420 | 15.795 | 0.00 | 0.00 |
| ATOM | 95  | C    | TRP | 5 | 5.920  | 35.995 | 17.643 | 0.00 | 0.00 |
| ATOM | 96  | O    | TRP | 5 | 5.678  | 37.170 | 17.669 | 0.00 | 0.00 |
| ATOM | 97  | N    | ILE | 6 | 7.084  | 35.539 | 18.033 | 0.00 | 0.00 |
| ATOM | 98  | H    | ILE | 6 | 7.233  | 34.575 | 17.968 | 0.00 | 0.00 |
| ATOM | 99  | CA   | ILE | 6 | 8.109  | 36.342 | 18.685 | 0.00 | 0.00 |
| ATOM | 100 | HA   | ILE | 6 | 7.626  | 36.834 | 19.503 | 0.00 | 0.00 |
| ATOM | 101 | CB   | ILE | 6 | 9.179  | 35.423 | 19.275 | 0.00 | 0.00 |
| ATOM | 102 | HB   | ILE | 6 | 8.676  | 34.596 | 19.731 | 0.00 | 0.00 |
| ATOM | 103 | CG2  | ILE | 6 | 10.090 | 34.854 | 18.220 | 0.00 | 0.00 |
| ATOM | 104 | 1HG2 | ILE | 6 | 10.494 | 35.129 | 17.894 | 0.00 | 0.00 |
| ATOM | 105 | 2HG2 | ILE | 6 | 10.483 | 34.428 | 18.297 | 0.00 | 0.00 |
| ATOM | 106 | 3HG2 | ILE | 6 | 9.958  | 34.558 | 17.711 | 0.00 | 0.00 |

|      |     |      |     |    |        |        |        |      |      |
|------|-----|------|-----|----|--------|--------|--------|------|------|
| ATOM | 107 | CG1  | ILE | 6  | 9.997  | 36.062 | 20.368 | 0.00 | 0.00 |
| ATOM | 108 | ZHG1 | ILE | 6  | 10.728 | 35.829 | 20.412 | 0.00 | 0.00 |
| ATOM | 109 | 3HG1 | ILE | 6  | 10.057 | 36.810 | 20.293 | 0.00 | 0.00 |
| ATOM | 110 | CD1  | ILE | 6  | 9.785  | 35.996 | 21.540 | 0.00 | 0.00 |
| ATOM | 111 | 1HD1 | ILE | 6  | 9.650  | 36.112 | 21.821 | 0.00 | 0.00 |
| ATOM | 112 | 2HD1 | ILE | 6  | 9.661  | 35.784 | 21.890 | 0.00 | 0.00 |
| ATOM | 113 | 3HD1 | ILE | 6  | 9.909  | 36.057 | 21.770 | 0.00 | 0.00 |
| ATOM | 114 | C    | ILE | 6  | 8.678  | 37.464 | 17.812 | 0.00 | 0.00 |
| ATOM | 115 | O    | ILE | 6  | 9.167  | 38.451 | 18.326 | 0.00 | 0.00 |
| ATOM | 116 | N    | ALA | 7  | 8.553  | 37.384 | 16.495 | 0.00 | 0.00 |
| ATOM | 117 | H    | ALA | 7  | 8.155  | 36.563 | 16.110 | 0.00 | 0.00 |
| ATOM | 118 | CA   | ALA | 7  | 8.915  | 38.468 | 15.599 | 0.00 | 0.00 |
| ATOM | 119 | HA   | ALA | 7  | 9.934  | 38.736 | 15.776 | 0.00 | 0.00 |
| ATOM | 120 | CB   | ALA | 7  | 8.801  | 37.975 | 14.185 | 0.00 | 0.00 |
| ATOM | 121 | HB1  | ALA | 7  | 8.800  | 37.880 | 13.862 | 0.00 | 0.00 |
| ATOM | 122 | HB2  | ALA | 7  | 8.773  | 37.825 | 13.836 | 0.00 | 0.00 |
| ATOM | 123 | HB3  | ALA | 7  | 8.754  | 37.868 | 13.832 | 0.00 | 0.00 |
| ATOM | 124 | C    | ALA | 7  | 8.083  | 39.728 | 15.810 | 0.00 | 0.00 |
| ATOM | 125 | O    | ALA | 7  | 8.558  | 40.812 | 15.562 | 0.00 | 0.00 |
| ATOM | 126 | N    | GLN | 8  | 6.871  | 39.609 | 16.332 | 0.00 | 0.00 |
| ATOM | 127 | H    | GLN | 8  | 6.540  | 38.700 | 16.537 | 0.00 | 0.00 |
| ATOM | 128 | CA   | GLN | 8  | 6.037  | 40.739 | 16.712 | 0.00 | 0.00 |
| ATOM | 129 | HA   | GLN | 8  | 6.050  | 41.444 | 15.911 | 0.00 | 0.00 |
| ATOM | 130 | CB   | GLN | 8  | 4.609  | 40.288 | 16.921 | 0.00 | 0.00 |
| ATOM | 131 | HB2  | GLN | 8  | 4.574  | 39.569 | 17.612 | 0.00 | 0.00 |
| ATOM | 132 | HB3  | GLN | 8  | 4.056  | 41.059 | 17.266 | 0.00 | 0.00 |
| ATOM | 133 | CG   | GLN | 8  | 3.965  | 39.793 | 15.745 | 0.00 | 0.00 |
| ATOM | 134 | HG2  | GLN | 8  | 4.028  | 40.489 | 15.056 | 0.00 | 0.00 |
| ATOM | 135 | HG3  | GLN | 8  | 4.470  | 39.004 | 15.404 | 0.00 | 0.00 |
| ATOM | 136 | CD   | GLN | 8  | 2.556  | 39.401 | 15.915 | 0.00 | 0.00 |
| ATOM | 137 | OE1  | GLN | 8  | 1.955  | 39.534 | 16.822 | 0.00 | 0.00 |
| ATOM | 138 | NE2  | GLN | 8  | 1.972  | 38.894 | 15.038 | 0.00 | 0.00 |
| ATOM | 139 | 1HE2 | GLN | 8  | 1.054  | 38.644 | 15.143 | 0.00 | 0.00 |
| ATOM | 140 | 2HE2 | GLN | 8  | 2.439  | 38.783 | 14.280 | 0.00 | 0.00 |
| ATOM | 141 | C    | GLN | 8  | 6.558  | 41.475 | 17.941 | 0.00 | 0.00 |
| ATOM | 142 | O    | GLN | 8  | 6.300  | 42.645 | 18.092 | 0.00 | 0.00 |
| ATOM | 143 | N    | GLU | 9  | 7.334  | 40.831 | 18.792 | 0.00 | 0.00 |
| ATOM | 144 | H    | GLU | 9  | 7.509  | 39.876 | 18.632 | 0.00 | 0.00 |
| ATOM | 145 | CA   | GLU | 9  | 8.056  | 41.493 | 19.875 | 0.00 | 0.00 |
| ATOM | 146 | HA   | GLU | 9  | 7.428  | 42.269 | 20.287 | 0.00 | 0.00 |
| ATOM | 147 | CB   | GLU | 9  | 8.395  | 40.517 | 20.997 | 0.00 | 0.00 |
| ATOM | 148 | HB2  | GLU | 9  | 9.063  | 39.766 | 20.625 | 0.00 | 0.00 |
| ATOM | 149 | HB3  | GLU | 9  | 8.920  | 41.044 | 21.766 | 0.00 | 0.00 |
| ATOM | 150 | CG   | GLU | 9  | 7.200  | 39.829 | 21.630 | 0.00 | 0.00 |
| ATOM | 151 | HG2  | GLU | 9  | 6.668  | 39.295 | 20.888 | 0.00 | 0.00 |
| ATOM | 152 | HG3  | GLU | 9  | 7.557  | 39.114 | 22.330 | 0.00 | 0.00 |
| ATOM | 153 | CD   | GLU | 9  | 6.280  | 40.766 | 22.333 | 0.00 | 0.00 |
| ATOM | 154 | OE1  | GLU | 9  | 5.910  | 41.407 | 22.429 | 0.00 | 0.00 |
| ATOM | 155 | OE2  | GLU | 9  | 5.911  | 40.888 | 22.814 | 0.00 | 0.00 |
| ATOM | 156 | C    | GLU | 9  | 9.308  | 42.184 | 19.359 | 0.00 | 0.00 |
| ATOM | 157 | O    | GLU | 9  | 9.528  | 43.344 | 19.660 | 0.00 | 0.00 |
| ATOM | 158 | N    | LEU | 10 | 10.081 | 41.533 | 18.485 | 0.00 | 0.00 |
| ATOM | 159 | H    | LEU | 10 | 9.841  | 40.591 | 18.267 | 0.00 | 0.00 |
| ATOM | 160 | CA   | LEU | 10 | 11.268 | 42.120 | 17.851 | 0.00 | 0.00 |
| ATOM | 161 | HA   | LEU | 10 | 11.944 | 42.403 | 18.643 | 0.00 | 0.00 |
| ATOM | 162 | CB   | LEU | 10 | 11.946 | 41.048 | 16.994 | 0.00 | 0.00 |
| ATOM | 163 | HB2  | LEU | 10 | 12.054 | 40.157 | 17.585 | 0.00 | 0.00 |
| ATOM | 164 | HB3  | LEU | 10 | 11.299 | 40.813 | 16.172 | 0.00 | 0.00 |
| ATOM | 165 | CG   | LEU | 10 | 13.316 | 41.429 | 16.430 | 0.00 | 0.00 |
| ATOM | 166 | HG   | LEU | 10 | 13.199 | 42.272 | 15.786 | 0.00 | 0.00 |
| ATOM | 167 | CD1  | LEU | 10 | 14.338 | 41.774 | 17.478 | 0.00 | 0.00 |
| ATOM | 168 | 1HD1 | LEU | 10 | 14.627 | 41.843 | 17.732 | 0.00 | 0.00 |
| ATOM | 169 | 2HD1 | LEU | 10 | 14.575 | 41.883 | 17.704 | 0.00 | 0.00 |
| ATOM | 170 | 3HD1 | LEU | 10 | 14.573 | 41.845 | 17.752 | 0.00 | 0.00 |
| ATOM | 171 | CD2  | LEU | 10 | 13.875 | 40.288 | 15.621 | 0.00 | 0.00 |
| ATOM | 172 | 1HD2 | LEU | 10 | 13.801 | 40.073 | 15.196 | 0.00 | 0.00 |
| ATOM | 173 | 2HD2 | LEU | 10 | 14.284 | 40.159 | 15.420 | 0.00 | 0.00 |
| ATOM | 174 | 3HD2 | LEU | 10 | 13.939 | 39.814 | 15.656 | 0.00 | 0.00 |
| ATOM | 175 | C    | LEU | 10 | 10.940 | 43.398 | 17.061 | 0.00 | 0.00 |
| ATOM | 176 | O    | LEU | 10 | 11.715 | 44.336 | 17.052 | 0.00 | 0.00 |
| ATOM | 177 | N    | ARG | 11 | 9.738  | 43.482 | 16.497 | 0.00 | 0.00 |
| ATOM | 178 | H    | ARG | 11 | 9.202  | 42.649 | 16.488 | 0.00 | 0.00 |
| ATOM | 179 | CA   | ARG | 11 | 9.175  | 44.666 | 15.842 | 0.00 | 0.00 |
| ATOM | 180 | HA   | ARG | 11 | 9.854  | 44.963 | 15.059 | 0.00 | 0.00 |
| ATOM | 181 | CB   | ARG | 11 | 7.850  | 44.272 | 15.193 | 0.00 | 0.00 |
| ATOM | 182 | HB2  | ARG | 11 | 7.992  | 43.365 | 14.655 | 0.00 | 0.00 |
| ATOM | 183 | HB3  | ARG | 11 | 7.130  | 44.073 | 15.946 | 0.00 | 0.00 |
| ATOM | 184 | CG   | ARG | 11 | 7.281  | 45.291 | 14.240 | 0.00 | 0.00 |
| ATOM | 185 | HG2  | ARG | 11 | 7.023  | 46.166 | 14.760 | 0.00 | 0.00 |
| ATOM | 186 | HG3  | ARG | 11 | 8.019  | 45.522 | 13.533 | 0.00 | 0.00 |
| ATOM | 187 | CD   | ARG | 11 | 6.068  | 44.792 | 13.504 | 0.00 | 0.00 |
| ATOM | 188 | HD2  | ARG | 11 | 5.784  | 45.497 | 12.773 | 0.00 | 0.00 |
| ATOM | 189 | HD3  | ARG | 11 | 6.320  | 43.905 | 13.020 | 0.00 | 0.00 |
| ATOM | 190 | NE   | ARG | 11 | 4.957  | 44.573 | 14.351 | 0.00 | 0.00 |
| ATOM | 191 | HE   | ARG | 11 | 4.955  | 44.964 | 15.202 | 0.00 | 0.00 |
| ATOM | 192 | CZ   | ARG | 11 | 3.910  | 43.959 | 14.091 | 0.00 | 0.00 |
| ATOM | 193 | NH1  | ARG | 11 | 3.729  | 43.440 | 13.019 | 0.00 | 0.00 |
| ATOM | 194 | 1HH1 | ARG | 11 | 4.371  | 43.541 | 12.325 | 0.00 | 0.00 |
| ATOM | 195 | 2HH1 | ARG | 11 | 2.914  | 42.988 | 12.867 | 0.00 | 0.00 |
| ATOM | 196 | NH2  | ARG | 11 | 3.010  | 43.837 | 14.937 | 0.00 | 0.00 |
| ATOM | 197 | 1HH2 | ARG | 11 | 3.098  | 44.228 | 15.772 | 0.00 | 0.00 |
| ATOM | 198 | 2HH2 | ARG | 11 | 2.218  | 43.384 | 14.728 | 0.00 | 0.00 |
| ATOM | 199 | C    | ARG | 11 | 9.022  | 45.879 | 16.752 | 0.00 | 0.00 |
| ATOM | 200 | O    | ARG | 11 | 9.120  | 46.980 | 16.256 | 0.00 | 0.00 |
| ATOM | 201 | N    | ARG | 12 | 8.837  | 45.717 | 18.060 | 0.00 | 0.00 |
| ATOM | 202 | H    | ARG | 12 | 8.805  | 44.786 | 18.391 | 0.00 | 0.00 |
| ATOM | 203 | CA   | ARG | 12 | 8.630  | 46.814 | 19.022 | 0.00 | 0.00 |
| ATOM | 204 | HA   | ARG | 12 | 8.575  | 47.738 | 18.466 | 0.00 | 0.00 |
| ATOM | 205 | CB   | ARG | 12 | 7.272  | 46.680 | 19.709 | 0.00 | 0.00 |
| ATOM | 206 | HB2  | ARG | 12 | 7.088  | 47.572 | 20.268 | 0.00 | 0.00 |
| ATOM | 207 | HB3  | ARG | 12 | 6.525  | 46.634 | 18.955 | 0.00 | 0.00 |
| ATOM | 208 | CG   | ARG | 12 | 7.095  | 45.500 | 20.634 | 0.00 | 0.00 |
| ATOM | 209 | HG2  | ARG | 12 | 7.103  | 44.682 | 20.116 | 0.00 | 0.00 |
| ATOM | 210 | HG3  | ARG | 12 | 7.810  | 45.451 | 21.279 | 0.00 | 0.00 |
| ATOM | 211 | CD   | ARG | 12 | 5.908  | 45.492 | 21.384 | 0.00 | 0.00 |

|      |     |      |     |    |        |        |        |      |      |
|------|-----|------|-----|----|--------|--------|--------|------|------|
| ATOM | 212 | HD2  | ARG | 12 | 5.884  | 46.307 | 21.872 | 0.00 | 0.00 |
| ATOM | 213 | HD3  | ARG | 12 | 5.207  | 45.530 | 20.750 | 0.00 | 0.00 |
| ATOM | 214 | NE   | ARG | 12 | 5.720  | 44.376 | 22.255 | 0.00 | 0.00 |
| ATOM | 215 | HE   | ARG | 12 | 5.823  | 43.505 | 22.041 | 0.00 | 0.00 |
| ATOM | 216 | CZ   | ARG | 12 | 5.340  | 44.381 | 23.326 | 0.00 | 0.00 |
| ATOM | 217 | NH1  | ARG | 12 | 5.156  | 45.419 | 23.782 | 0.00 | 0.00 |
| ATOM | 218 | 1HH1 | ARG | 12 | 5.366  | 46.262 | 23.333 | 0.00 | 0.00 |
| ATOM | 219 | 2HH1 | ARG | 12 | 4.842  | 45.362 | 24.593 | 0.00 | 0.00 |
| ATOM | 220 | NH2  | ARG | 12 | 5.154  | 43.311 | 23.982 | 0.00 | 0.00 |
| ATOM | 221 | 1HH2 | ARG | 12 | 5.361  | 42.481 | 23.658 | 0.00 | 0.00 |
| ATOM | 222 | 2HH2 | ARG | 12 | 4.881  | 43.313 | 24.788 | 0.00 | 0.00 |
| ATOM | 223 | C    | ARG | 12 | 9.752  | 47.063 | 20.018 | 0.00 | 0.00 |
| ATOM | 224 | O    | ARG | 12 | 9.960  | 48.204 | 20.383 | 0.00 | 0.00 |
| ATOM | 225 | N    | ILE | 13 | 10.478 | 46.048 | 20.470 | 0.00 | 0.00 |
| ATOM | 226 | H    | ILE | 13 | 10.254 | 45.137 | 20.139 | 0.00 | 0.00 |
| ATOM | 227 | CA   | ILE | 13 | 11.379 | 46.186 | 21.623 | 0.00 | 0.00 |
| ATOM | 228 | HA   | ILE | 13 | 10.822 | 46.680 | 22.401 | 0.00 | 0.00 |
| ATOM | 229 | CB   | ILE | 13 | 11.796 | 44.830 | 22.200 | 0.00 | 0.00 |
| ATOM | 230 | HB   | ILE | 13 | 12.454 | 45.054 | 23.016 | 0.00 | 0.00 |
| ATOM | 231 | CG2  | ILE | 13 | 10.595 | 44.125 | 22.810 | 0.00 | 0.00 |
| ATOM | 232 | 1HG2 | ILE | 13 | 10.399 | 43.862 | 23.043 | 0.00 | 0.00 |
| ATOM | 233 | 2HG2 | ILE | 13 | 10.275 | 44.100 | 23.036 | 0.00 | 0.00 |
| ATOM | 234 | 3HG2 | ILE | 13 | 10.227 | 43.921 | 22.841 | 0.00 | 0.00 |
| ATOM | 235 | CG1  | ILE | 13 | 12.574 | 43.957 | 21.220 | 0.00 | 0.00 |
| ATOM | 236 | 2HG1 | ILE | 13 | 12.016 | 43.670 | 20.475 | 0.00 | 0.00 |
| ATOM | 237 | 3HG1 | ILE | 13 | 13.307 | 44.462 | 20.831 | 0.00 | 0.00 |
| ATOM | 238 | CD1  | ILE | 13 | 13.148 | 42.785 | 21.714 | 0.00 | 0.00 |
| ATOM | 239 | 1HD1 | ILE | 13 | 13.280 | 42.569 | 21.978 | 0.00 | 0.00 |
| ATOM | 240 | 2HD1 | ILE | 13 | 13.190 | 42.374 | 21.782 | 0.00 | 0.00 |
| ATOM | 241 | 3HD1 | ILE | 13 | 13.402 | 42.550 | 21.712 | 0.00 | 0.00 |
| ATOM | 242 | C    | ILE | 13 | 12.589 | 47.086 | 21.404 | 0.00 | 0.00 |
| ATOM | 243 | O    | ILE | 13 | 13.047 | 47.698 | 22.346 | 0.00 | 0.00 |
| ATOM | 244 | N    | GLY | 14 | 13.084 | 47.230 | 20.186 | 0.00 | 0.00 |
| ATOM | 245 | H    | GLY | 14 | 12.622 | 46.773 | 19.432 | 0.00 | 0.00 |
| ATOM | 246 | CA   | GLY | 14 | 14.160 | 48.169 | 19.871 | 0.00 | 0.00 |
| ATOM | 247 | HA2  | GLY | 14 | 14.970 | 48.042 | 20.559 | 0.00 | 0.00 |
| ATOM | 248 | HA3  | GLY | 14 | 14.511 | 47.952 | 18.884 | 0.00 | 0.00 |
| ATOM | 249 | C    | GLY | 14 | 13.725 | 49.624 | 19.914 | 0.00 | 0.00 |
| ATOM | 250 | O    | GLY | 14 | 14.483 | 50.485 | 20.304 | 0.00 | 0.00 |
| ATOM | 251 | N    | ASP | 15 | 12.486 | 49.893 | 19.575 | 0.00 | 0.00 |
| ATOM | 252 | H    | ASP | 15 | 11.924 | 49.138 | 19.274 | 0.00 | 0.00 |
| ATOM | 253 | CA   | ASP | 15 | 11.878 | 51.212 | 19.680 | 0.00 | 0.00 |
| ATOM | 254 | HA   | ASP | 15 | 12.604 | 51.947 | 19.367 | 0.00 | 0.00 |
| ATOM | 255 | CB   | ASP | 15 | 10.691 | 51.279 | 18.736 | 0.00 | 0.00 |
| ATOM | 256 | HB2  | ASP | 15 | 10.937 | 50.839 | 17.818 | 0.00 | 0.00 |
| ATOM | 257 | HB3  | ASP | 15 | 9.888  | 50.732 | 19.127 | 0.00 | 0.00 |
| ATOM | 258 | CG   | ASP | 15 | 10.277 | 52.668 | 18.491 | 0.00 | 0.00 |
| ATOM | 259 | OD1  | ASP | 15 | 10.949 | 53.346 | 17.822 | 0.00 | 0.00 |
| ATOM | 260 | OD2  | ASP | 15 | 9.273  | 53.076 | 18.940 | 0.00 | 0.00 |
| ATOM | 261 | C    | ASP | 15 | 11.486 | 51.563 | 21.118 | 0.00 | 0.00 |
| ATOM | 262 | O    | ASP | 15 | 11.625 | 52.704 | 21.529 | 0.00 | 0.00 |
| ATOM | 263 | N    | GLU | 16 | 11.069 | 50.588 | 21.914 | 0.00 | 0.00 |
| ATOM | 264 | H    | GLU | 16 | 10.912 | 49.694 | 21.512 | 0.00 | 0.00 |
| ATOM | 265 | CA   | GLU | 16 | 10.852 | 50.758 | 23.349 | 0.00 | 0.00 |
| ATOM | 266 | HA   | GLU | 16 | 10.250 | 51.639 | 23.506 | 0.00 | 0.00 |
| ATOM | 267 | CB   | GLU | 16 | 10.100 | 49.564 | 23.936 | 0.00 | 0.00 |
| ATOM | 268 | HB2  | GLU | 16 | 10.476 | 48.727 | 23.618 | 0.00 | 0.00 |
| ATOM | 269 | HB3  | GLU | 16 | 10.179 | 49.547 | 24.912 | 0.00 | 0.00 |
| ATOM | 270 | CG   | GLU | 16 | 8.731  | 49.535 | 23.671 | 0.00 | 0.00 |
| ATOM | 271 | HG2  | GLU | 16 | 8.390  | 50.367 | 23.917 | 0.00 | 0.00 |
| ATOM | 272 | HG3  | GLU | 16 | 8.645  | 49.489 | 22.738 | 0.00 | 0.00 |
| ATOM | 273 | CD   | GLU | 16 | 7.933  | 48.465 | 24.311 | 0.00 | 0.00 |
| ATOM | 274 | OE1  | GLU | 16 | 7.567  | 47.986 | 24.420 | 0.00 | 0.00 |
| ATOM | 275 | OE2  | GLU | 16 | 7.643  | 48.100 | 24.736 | 0.00 | 0.00 |
| ATOM | 276 | C    | GLU | 16 | 12.163 | 51.000 | 24.105 | 0.00 | 0.00 |
| ATOM | 277 | O    | GLU | 16 | 12.200 | 51.837 | 24.990 | 0.00 | 0.00 |
| ATOM | 278 | N    | PHE | 17 | 13.260 | 50.362 | 23.705 | 0.00 | 0.00 |
| ATOM | 279 | H    | PHE | 17 | 13.175 | 49.647 | 23.021 | 0.00 | 0.00 |
| ATOM | 280 | CA   | PHE | 17 | 14.583 | 50.689 | 24.222 | 0.00 | 0.00 |
| ATOM | 281 | HA   | PHE | 17 | 14.515 | 50.712 | 25.301 | 0.00 | 0.00 |
| ATOM | 282 | CB   | PHE | 17 | 15.592 | 49.600 | 23.855 | 0.00 | 0.00 |
| ATOM | 283 | HB2  | PHE | 17 | 15.230 | 48.653 | 24.205 | 0.00 | 0.00 |
| ATOM | 284 | HB3  | PHE | 17 | 15.678 | 49.544 | 22.786 | 0.00 | 0.00 |
| ATOM | 285 | CG   | PHE | 17 | 16.952 | 49.841 | 24.458 | 0.00 | 0.00 |
| ATOM | 286 | CD1  | PHE | 17 | 17.159 | 49.710 | 25.809 | 0.00 | 0.00 |
| ATOM | 287 | HD1  | PHE | 17 | 16.367 | 49.384 | 26.417 | 0.00 | 0.00 |
| ATOM | 288 | CE1  | PHE | 17 | 18.381 | 50.038 | 26.373 | 0.00 | 0.00 |
| ATOM | 289 | HE1  | PHE | 17 | 18.527 | 49.929 | 27.404 | 0.00 | 0.00 |
| ATOM | 290 | CZ   | PHE | 17 | 19.408 | 50.496 | 25.588 | 0.00 | 0.00 |
| ATOM | 291 | HZ   | PHE | 17 | 20.339 | 50.747 | 26.023 | 0.00 | 0.00 |
| ATOM | 292 | CE2  | PHE | 17 | 19.216 | 50.611 | 24.241 | 0.00 | 0.00 |
| ATOM | 293 | HE2  | PHE | 17 | 20.001 | 50.972 | 23.644 | 0.00 | 0.00 |
| ATOM | 294 | CD2  | PHE | 17 | 17.991 | 50.278 | 23.677 | 0.00 | 0.00 |
| ATOM | 295 | HD2  | PHE | 17 | 17.843 | 50.375 | 22.645 | 0.00 | 0.00 |
| ATOM | 296 | C    | PHE | 17 | 15.062 | 52.076 | 23.773 | 0.00 | 0.00 |
| ATOM | 297 | O    | PHE | 17 | 15.653 | 52.787 | 24.560 | 0.00 | 0.00 |
| ATOM | 298 | N    | ASN | 18 | 14.737 | 52.527 | 22.567 | 0.00 | 0.00 |
| ATOM | 299 | H    | ASN | 18 | 14.265 | 51.915 | 21.944 | 0.00 | 0.00 |
| ATOM | 300 | CA   | ASN | 18 | 15.039 | 53.886 | 22.118 | 0.00 | 0.00 |
| ATOM | 301 | HA   | ASN | 18 | 16.099 | 54.037 | 22.243 | 0.00 | 0.00 |
| ATOM | 302 | CB   | ASN | 18 | 14.724 | 54.036 | 20.633 | 0.00 | 0.00 |
| ATOM | 303 | HB2  | ASN | 18 | 15.099 | 53.194 | 20.082 | 0.00 | 0.00 |
| ATOM | 304 | HB3  | ASN | 18 | 13.662 | 54.064 | 20.494 | 0.00 | 0.00 |
| ATOM | 305 | CG   | ASN | 18 | 15.335 | 55.286 | 20.065 | 0.00 | 0.00 |
| ATOM | 306 | OD1  | ASN | 18 | 16.512 | 55.381 | 19.869 | 0.00 | 0.00 |
| ATOM | 307 | ND2  | ASN | 18 | 14.574 | 56.277 | 19.802 | 0.00 | 0.00 |
| ATOM | 308 | 1HD2 | ASN | 18 | 14.967 | 57.093 | 19.418 | 0.00 | 0.00 |
| ATOM | 309 | 2HD2 | ASN | 18 | 13.606 | 56.198 | 19.958 | 0.00 | 0.00 |
| ATOM | 310 | C    | ASN | 18 | 14.337 | 54.955 | 22.957 | 0.00 | 0.00 |
| ATOM | 311 | O    | ASN | 18 | 14.937 | 55.962 | 23.272 | 0.00 | 0.00 |
| ATOM | 312 | N    | ALA | 19 | 13.109 | 54.713 | 23.388 | 0.00 | 0.00 |
| ATOM | 313 | H    | ALA | 19 | 12.665 | 53.886 | 23.069 | 0.00 | 0.00 |
| ATOM | 314 | CA   | ALA | 19 | 12.387 | 55.573 | 24.308 | 0.00 | 0.00 |
| ATOM | 315 | HA   | ALA | 19 | 12.466 | 56.583 | 23.956 | 0.00 | 0.00 |
| ATOM | 316 | CB   | ALA | 19 | 10.927 | 55.190 | 24.290 | 0.00 | 0.00 |

|      |     |      |     |    |        |        |        |      |      |
|------|-----|------|-----|----|--------|--------|--------|------|------|
| ATOM | 317 | HB1  | ALA | 19 | 10.536 | 55.209 | 24.102 | 0.00 | 0.00 |
| ATOM | 318 | HB2  | ALA | 19 | 10.624 | 54.906 | 24.287 | 0.00 | 0.00 |
| ATOM | 319 | HB3  | ALA | 19 | 10.557 | 55.202 | 24.472 | 0.00 | 0.00 |
| ATOM | 320 | C    | ALA | 19 | 12.959 | 55.552 | 25.718 | 0.00 | 0.00 |
| ATOM | 321 | O    | ALA | 19 | 12.965 | 56.554 | 26.382 | 0.00 | 0.00 |
| ATOM | 322 | N    | TYR | 20 | 13.499 | 54.441 | 26.165 | 0.00 | 0.00 |
| ATOM | 323 | H    | TYR | 20 | 13.433 | 53.647 | 25.594 | 0.00 | 0.00 |
| ATOM | 324 | CA   | TYR | 20 | 14.193 | 54.325 | 27.431 | 0.00 | 0.00 |
| ATOM | 325 | HA   | TYR | 20 | 13.614 | 54.834 | 28.184 | 0.00 | 0.00 |
| ATOM | 326 | CB   | TYR | 20 | 14.279 | 52.865 | 27.828 | 0.00 | 0.00 |
| ATOM | 327 | HB2  | TYR | 20 | 13.296 | 52.469 | 27.845 | 0.00 | 0.00 |
| ATOM | 328 | HB3  | TYR | 20 | 14.823 | 52.327 | 27.086 | 0.00 | 0.00 |
| ATOM | 329 | CG   | TYR | 20 | 14.896 | 52.603 | 29.151 | 0.00 | 0.00 |
| ATOM | 330 | CD1  | TYR | 20 | 14.262 | 52.992 | 30.303 | 0.00 | 0.00 |
| ATOM | 331 | HD1  | TYR | 20 | 13.339 | 53.469 | 30.256 | 0.00 | 0.00 |
| ATOM | 332 | CE1  | TYR | 20 | 14.833 | 52.746 | 31.527 | 0.00 | 0.00 |
| ATOM | 333 | HE1  | TYR | 20 | 14.346 | 53.040 | 32.402 | 0.00 | 0.00 |
| ATOM | 334 | CZ   | TYR | 20 | 16.039 | 52.114 | 31.600 | 0.00 | 0.00 |
| ATOM | 335 | OH   | TYR | 20 | 16.593 | 51.888 | 32.774 | 0.00 | 0.00 |
| ATOM | 336 | HH   | TYR | 20 | 16.087 | 52.213 | 33.460 | 0.00 | 0.00 |
| ATOM | 337 | CE2  | TYR | 20 | 16.666 | 51.720 | 30.452 | 0.00 | 0.00 |
| ATOM | 338 | HE2  | TYR | 20 | 17.585 | 51.238 | 30.516 | 0.00 | 0.00 |
| ATOM | 339 | CD2  | TYR | 20 | 16.096 | 51.966 | 29.232 | 0.00 | 0.00 |
| ATOM | 340 | HD2  | TYR | 20 | 16.588 | 51.679 | 28.355 | 0.00 | 0.00 |
| ATOM | 341 | C    | TYR | 20 | 15.568 | 54.977 | 27.414 | 0.00 | 0.00 |
| ATOM | 342 | O    | TYR | 20 | 15.950 | 55.606 | 28.370 | 0.00 | 0.00 |
| ATOM | 343 | N    | TYR | 21 | 16.294 | 54.913 | 26.315 | 0.00 | 0.00 |
| ATOM | 344 | H    | TYR | 21 | 15.963 | 54.333 | 25.590 | 0.00 | 0.00 |
| ATOM | 345 | CA   | TYR | 21 | 17.549 | 55.623 | 26.091 | 0.00 | 0.00 |
| ATOM | 346 | HA   | TYR | 21 | 18.230 | 55.388 | 26.878 | 0.00 | 0.00 |
| ATOM | 347 | CB   | TYR | 21 | 18.157 | 55.138 | 24.790 | 0.00 | 0.00 |
| ATOM | 348 | HB2  | TYR | 21 | 18.421 | 54.127 | 24.895 | 0.00 | 0.00 |
| ATOM | 349 | HB3  | TYR | 21 | 17.420 | 55.170 | 24.042 | 0.00 | 0.00 |
| ATOM | 350 | CG   | TYR | 21 | 19.345 | 55.898 | 24.321 | 0.00 | 0.00 |
| ATOM | 351 | CD1  | TYR | 21 | 20.552 | 55.709 | 24.898 | 0.00 | 0.00 |
| ATOM | 352 | HD1  | TYR | 21 | 20.633 | 55.030 | 25.667 | 0.00 | 0.00 |
| ATOM | 353 | CE1  | TYR | 21 | 21.650 | 56.413 | 24.470 | 0.00 | 0.00 |
| ATOM | 354 | HE1  | TYR | 21 | 22.567 | 56.271 | 24.920 | 0.00 | 0.00 |
| ATOM | 355 | CZ   | TYR | 21 | 21.539 | 57.308 | 23.466 | 0.00 | 0.00 |
| ATOM | 356 | OH   | TYR | 21 | 22.585 | 57.975 | 23.040 | 0.00 | 0.00 |
| ATOM | 357 | HH   | TYR | 21 | 23.346 | 57.746 | 23.468 | 0.00 | 0.00 |
| ATOM | 358 | CE2  | TYR | 21 | 20.329 | 57.497 | 22.894 | 0.00 | 0.00 |
| ATOM | 359 | HE2  | TYR | 21 | 20.248 | 58.180 | 22.130 | 0.00 | 0.00 |
| ATOM | 360 | CD2  | TYR | 21 | 19.236 | 56.795 | 23.317 | 0.00 | 0.00 |
| ATOM | 361 | HD2  | TYR | 21 | 18.319 | 56.948 | 22.877 | 0.00 | 0.00 |
| ATOM | 362 | C    | TYR | 21 | 17.372 | 57.129 | 26.106 | 0.00 | 0.00 |
| ATOM | 363 | O    | TYR | 21 | 18.215 | 57.832 | 26.599 | 0.00 | 0.00 |
| ATOM | 364 | N    | ALA | 22 | 16.252 | 57.623 | 25.642 | 0.00 | 0.00 |
| ATOM | 365 | H    | ALA | 22 | 15.612 | 56.998 | 25.238 | 0.00 | 0.00 |
| ATOM | 366 | CA   | ALA | 22 | 15.926 | 59.024 | 25.598 | 0.00 | 0.00 |
| ATOM | 367 | HA   | ALA | 22 | 16.797 | 59.561 | 25.339 | 0.00 | 0.00 |
| ATOM | 368 | CB   | ALA | 22 | 14.950 | 59.239 | 24.512 | 0.00 | 0.00 |
| ATOM | 369 | HB1  | ALA | 22 | 14.802 | 59.388 | 24.195 | 0.00 | 0.00 |
| ATOM | 370 | HB2  | ALA | 22 | 14.721 | 59.158 | 24.197 | 0.00 | 0.00 |
| ATOM | 371 | HB3  | ALA | 22 | 14.613 | 59.329 | 24.349 | 0.00 | 0.00 |
| ATOM | 372 | C    | ALA | 22 | 15.453 | 59.606 | 26.899 | 0.00 | 0.00 |
| ATOM | 373 | O    | ALA | 22 | 15.007 | 60.684 | 26.911 | 0.00 | 0.00 |
| ATOM | 374 | N    | ARG | 23 | 15.542 | 58.920 | 27.997 | 0.00 | 0.00 |
| ATOM | 375 | H    | ARG | 23 | 15.916 | 58.055 | 27.916 | 0.00 | 0.00 |
| ATOM | 376 | CA   | ARG | 23 | 15.137 | 59.376 | 29.294 | 0.00 | 0.00 |
| ATOM | 377 | HA   | ARG | 23 | 14.185 | 59.794 | 29.195 | 0.00 | 0.00 |
| ATOM | 378 | CB   | ARG | 23 | 15.007 | 58.232 | 30.256 | 0.00 | 0.00 |
| ATOM | 379 | HB2  | ARG | 23 | 14.479 | 58.556 | 31.111 | 0.00 | 0.00 |
| ATOM | 380 | HB3  | ARG | 23 | 14.427 | 57.485 | 29.804 | 0.00 | 0.00 |
| ATOM | 381 | CG   | ARG | 23 | 16.298 | 57.640 | 30.714 | 0.00 | 0.00 |
| ATOM | 382 | HG2  | ARG | 23 | 16.919 | 57.428 | 29.889 | 0.00 | 0.00 |
| ATOM | 383 | HG3  | ARG | 23 | 16.790 | 58.319 | 31.330 | 0.00 | 0.00 |
| ATOM | 384 | CD   | ARG | 23 | 16.060 | 56.386 | 31.476 | 0.00 | 0.00 |
| ATOM | 385 | HD2  | ARG | 23 | 15.460 | 56.617 | 32.304 | 0.00 | 0.00 |
| ATOM | 386 | HD3  | ARG | 23 | 15.541 | 55.697 | 30.895 | 0.00 | 0.00 |
| ATOM | 387 | NE   | ARG | 23 | 17.269 | 55.793 | 31.934 | 0.00 | 0.00 |
| ATOM | 388 | HE   | ARG | 23 | 17.493 | 55.945 | 32.843 | 0.00 | 0.00 |
| ATOM | 389 | CZ   | ARG | 23 | 18.071 | 55.027 | 31.308 | 0.00 | 0.00 |
| ATOM | 390 | NH1  | ARG | 23 | 17.943 | 54.740 | 30.121 | 0.00 | 0.00 |
| ATOM | 391 | 1HH1 | ARG | 23 | 17.193 | 55.089 | 29.631 | 0.00 | 0.00 |
| ATOM | 392 | 2HH1 | ARG | 23 | 18.557 | 54.109 | 29.715 | 0.00 | 0.00 |
| ATOM | 393 | NH2  | ARG | 23 | 19.041 | 54.514 | 31.881 | 0.00 | 0.00 |
| ATOM | 394 | 1HH2 | ARG | 23 | 19.168 | 54.693 | 32.792 | 0.00 | 0.00 |
| ATOM | 395 | 2HH2 | ARG | 23 | 19.614 | 53.902 | 31.413 | 0.00 | 0.00 |
| ATOM | 396 | C    | ARG | 23 | 16.008 | 60.450 | 29.802 | 0.00 | 0.00 |
| ATOM | 397 | O    | ARG | 23 | 17.146 | 60.502 | 29.515 | 0.00 | 0.00 |
| ATOM | 398 | N    | ARG | 24 | 15.480 | 61.287 | 30.580 | 0.00 | 0.00 |
| ATOM | 399 | H    | ARG | 24 | 14.547 | 61.168 | 30.756 | 0.00 | 0.00 |
| ATOM | 400 | CA   | ARG | 24 | 16.140 | 62.358 | 31.181 | 0.00 | 0.00 |
| ATOM | 401 | HA   | ARG | 24 | 17.053 | 62.390 | 30.939 | 0.00 | 0.00 |
| ATOM | 402 | CB   | ARG | 24 | 15.659 | 63.548 | 30.817 | 0.00 | 0.00 |
| ATOM | 403 | HB2  | ARG | 24 | 15.637 | 63.942 | 31.265 | 0.00 | 0.00 |
| ATOM | 404 | HB3  | ARG | 24 | 15.072 | 63.505 | 30.609 | 0.00 | 0.00 |
| ATOM | 405 | CG   | ARG | 24 | 15.993 | 64.282 | 30.128 | 0.00 | 0.00 |
| ATOM | 406 | HG2  | ARG | 24 | 15.929 | 63.952 | 29.879 | 0.00 | 0.00 |
| ATOM | 407 | HG3  | ARG | 24 | 16.387 | 64.351 | 30.194 | 0.00 | 0.00 |
| ATOM | 408 | CD   | ARG | 24 | 15.886 | 65.377 | 29.671 | 0.00 | 0.00 |
| ATOM | 409 | HD2  | ARG | 24 | 15.857 | 65.599 | 29.569 | 0.00 | 0.00 |
| ATOM | 410 | HD3  | ARG | 24 | 15.853 | 65.402 | 29.667 | 0.00 | 0.00 |
| ATOM | 411 | NE   | ARG | 24 | 15.869 | 66.094 | 29.360 | 0.00 | 0.00 |
| ATOM | 412 | HE   | ARG | 24 | 15.940 | 65.983 | 29.511 | 0.00 | 0.00 |
| ATOM | 413 | CZ   | ARG | 24 | 15.777 | 66.878 | 28.894 | 0.00 | 0.00 |
| ATOM | 414 | NH1  | ARG | 24 | 15.685 | 67.135 | 28.632 | 0.00 | 0.00 |
| ATOM | 415 | 1HH1 | ARG | 24 | 15.681 | 66.743 | 28.788 | 0.00 | 0.00 |
| ATOM | 416 | 2HH1 | ARG | 24 | 15.626 | 67.734 | 28.278 | 0.00 | 0.00 |
| ATOM | 417 | NH2  | ARG | 24 | 15.775 | 67.439 | 28.667 | 0.00 | 0.00 |
| ATOM | 418 | 1HH2 | ARG | 24 | 15.845 | 67.289 | 28.844 | 0.00 | 0.00 |
| ATOM | 419 | 2HH2 | ARG | 24 | 15.700 | 68.025 | 28.317 | 0.00 | 0.00 |
| ATOM | 420 | C    | ARG | 24 | 16.122 | 62.251 | 32.489 | 0.00 | 0.00 |
| ATOM | 421 | O    | ARG | 24 | 15.579 | 61.933 | 32.965 | 0.00 | 0.00 |

```

TER
MOL 2
ATOM 422 N SER 25 26.492 58.450 2.589 0.00 0.00
ATOM 423 H SER 25 26.197 58.509 2.470 0.00 0.00
ATOM 424 CA SER 25 27.188 58.240 2.327 0.00 0.00
ATOM 425 HA SER 25 27.255 58.753 2.191 0.00 0.00
ATOM 426 CB SER 25 27.410 58.446 3.060 0.00 0.00
ATOM 427 HB2 SER 25 27.198 58.917 3.176 0.00 0.00
ATOM 428 HB3 SER 25 27.330 57.915 3.404 0.00 0.00
ATOM 429 OG SER 25 27.991 58.715 3.143 0.00 0.00
ATOM 430 HG SER 25 28.306 59.201 3.413 0.00 0.00
ATOM 431 C SER 25 27.609 57.150 1.536 0.00 0.00
ATOM 432 O SER 25 27.214 56.134 1.762 0.00 0.00
ATOM 433 N ALA 26 28.453 57.340 0.635 0.00 0.00
ATOM 434 H ALA 26 28.743 58.193 0.511 0.00 0.00
ATOM 435 CA ALA 26 28.983 56.390 -0.187 0.00 0.00
ATOM 436 HA ALA 26 28.248 55.770 -0.443 0.00 0.00
ATOM 437 CB ALA 26 29.444 57.079 -1.367 0.00 0.00
ATOM 438 HB1 ALA 26 29.539 56.996 -1.801 0.00 0.00
ATOM 439 HB2 ALA 26 29.321 57.431 -1.632 0.00 0.00
ATOM 440 HB3 ALA 26 29.810 57.306 -1.532 0.00 0.00
ATOM 441 C ALA 26 30.013 55.535 0.419 0.00 0.00
ATOM 442 O ALA 26 30.352 54.579 -0.084 0.00 0.00
ATOM 443 N SER 27 30.485 55.844 1.515 0.00 0.00
ATOM 444 H SER 27 30.177 56.648 1.862 0.00 0.00
ATOM 445 CA SER 27 31.458 55.134 2.242 0.00 0.00
ATOM 446 HA SER 27 32.126 54.747 1.580 0.00 0.00
ATOM 447 CB SER 27 32.206 56.066 3.052 0.00 0.00
ATOM 448 HB2 SER 27 31.852 56.278 3.725 0.00 0.00
ATOM 449 HB3 SER 27 32.910 55.784 3.329 0.00 0.00
ATOM 450 OG SER 27 32.478 57.010 2.583 0.00 0.00
ATOM 451 HG SER 27 32.812 57.307 2.767 0.00 0.00
ATOM 452 C SER 27 30.942 53.974 3.066 0.00 0.00
ATOM 453 O SER 27 31.630 53.489 3.931 0.00 0.00
ATOM 454 N GLU 28 29.733 53.513 2.831 0.00 0.00
ATOM 455 H GLU 28 29.217 53.940 2.109 0.00 0.00
ATOM 456 CA GLU 28 29.075 52.489 3.630 0.00 0.00
ATOM 457 HA GLU 28 29.014 52.845 4.637 0.00 0.00
ATOM 458 CB GLU 28 27.653 52.280 3.135 0.00 0.00
ATOM 459 HB2 GLU 28 27.259 51.689 3.618 0.00 0.00
ATOM 460 HB3 GLU 28 27.174 52.998 3.229 0.00 0.00
ATOM 461 CG GLU 28 27.364 51.915 1.923 0.00 0.00
ATOM 462 HG2 GLU 28 27.792 52.460 1.443 0.00 0.00
ATOM 463 HG3 GLU 28 27.766 51.178 1.849 0.00 0.00
ATOM 464 CD GLU 28 25.951 51.798 1.451 0.00 0.00
ATOM 465 OE1 GLU 28 25.627 52.244 0.477 0.00 0.00
ATOM 466 OE2 GLU 28 25.142 51.254 2.022 0.00 0.00
ATOM 467 C GLU 28 29.834 51.168 3.708 0.00 0.00
ATOM 468 O GLU 28 29.829 50.532 4.738 0.00 0.00
ATOM 469 N GLU 29 30.551 50.774 2.675 0.00 0.00
ATOM 470 H GLU 29 30.530 51.334 1.860 0.00 0.00
ATOM 471 CA GLU 29 31.358 49.559 2.670 0.00 0.00
ATOM 472 HA GLU 29 30.780 48.763 3.091 0.00 0.00
ATOM 473 CB GLU 29 31.690 49.186 1.246 0.00 0.00
ATOM 474 HB2 GLU 29 31.308 49.542 0.771 0.00 0.00
ATOM 475 HB3 GLU 29 32.386 49.293 0.962 0.00 0.00
ATOM 476 CG GLU 29 31.598 48.182 0.839 0.00 0.00
ATOM 477 HG2 GLU 29 31.966 47.839 1.284 0.00 0.00
ATOM 478 HG3 GLU 29 30.938 48.086 1.117 0.00 0.00
ATOM 479 CD GLU 29 31.896 47.776 -0.539 0.00 0.00
ATOM 480 OE1 GLU 29 32.038 47.789 -1.110 0.00 0.00
ATOM 481 OE2 GLU 29 31.997 47.439 -1.057 0.00 0.00
ATOM 482 C GLU 29 32.624 49.679 3.523 0.00 0.00
ATOM 483 O GLU 29 33.056 48.720 4.126 0.00 0.00
ATOM 484 N GLN 30 33.184 50.865 3.634 0.00 0.00
ATOM 485 H GLN 30 32.764 51.607 3.140 0.00 0.00
ATOM 486 CA GLN 30 34.303 51.166 4.513 0.00 0.00
ATOM 487 HA GLN 30 35.015 50.364 4.472 0.00 0.00
ATOM 488 CB GLN 30 35.006 52.428 4.053 0.00 0.00
ATOM 489 HB2 GLN 30 34.315 53.231 3.989 0.00 0.00
ATOM 490 HB3 GLN 30 35.730 52.683 4.791 0.00 0.00
ATOM 491 CG GLN 30 35.725 52.295 2.745 0.00 0.00
ATOM 492 HG2 GLN 30 36.389 52.764 2.663 0.00 0.00
ATOM 493 HG3 GLN 30 36.034 51.571 2.623 0.00 0.00
ATOM 494 CD GLN 30 35.219 52.523 1.703 0.00 0.00
ATOM 495 OE1 GLN 30 34.706 52.976 1.618 0.00 0.00
ATOM 496 NE2 GLN 30 35.334 52.226 0.858 0.00 0.00
ATOM 497 1HE2 GLN 30 35.014 52.375 0.162 0.00 0.00
ATOM 498 2HE2 GLN 30 35.758 51.857 0.897 0.00 0.00
ATOM 499 C GLN 30 33.854 51.279 5.955 0.00 0.00
ATOM 500 O GLN 30 34.530 50.799 6.842 0.00 0.00
ATOM 501 N VAL 31 32.671 51.818 6.199 0.00 0.00
ATOM 502 H VAL 31 32.180 52.216 5.437 0.00 0.00
ATOM 503 CA VAL 31 32.044 51.830 7.519 0.00 0.00
ATOM 504 HA VAL 31 32.771 52.160 8.243 0.00 0.00
ATOM 505 CB VAL 31 30.882 52.823 7.558 0.00 0.00
ATOM 506 HB VAL 31 30.194 52.592 6.777 0.00 0.00
ATOM 507 CG1 VAL 31 30.131 52.812 8.861 0.00 0.00
ATOM 508 1HG1 VAL 31 30.681 52.841 9.577 0.00 0.00
ATOM 509 2HG1 VAL 31 29.548 53.519 8.962 0.00 0.00
ATOM 510 3HG1 VAL 31 29.609 52.080 8.984 0.00 0.00
ATOM 511 CG2 VAL 31 31.380 54.226 7.353 0.00 0.00
ATOM 512 1HG2 VAL 31 31.586 54.576 7.301 0.00 0.00
ATOM 513 2HG2 VAL 31 31.458 54.567 7.236 0.00 0.00
ATOM 514 3HG2 VAL 31 31.465 54.582 7.377 0.00 0.00
ATOM 515 C VAL 31 31.632 50.432 7.952 0.00 0.00
ATOM 516 O VAL 31 31.737 50.113 9.119 0.00 0.00
ATOM 517 N ALA 32 31.257 49.546 7.047 0.00 0.00
ATOM 518 H ALA 32 31.104 49.849 6.113 0.00 0.00
ATOM 519 CA ALA 32 31.050 48.135 7.349 0.00 0.00
ATOM 520 HA ALA 32 30.360 48.062 8.169 0.00 0.00
ATOM 521 CB ALA 32 30.395 47.465 6.160 0.00 0.00
ATOM 522 HB1 ALA 32 30.479 47.517 5.637 0.00 0.00
ATOM 523 HB2 ALA 32 30.344 46.937 6.008 0.00 0.00
ATOM 524 HB3 ALA 32 29.878 47.457 5.993 0.00 0.00

```

|      |     |      |     |    |        |        |        |      |      |
|------|-----|------|-----|----|--------|--------|--------|------|------|
| ATOM | 525 | C    | ALA | 32 | 32.341 | 47.432 | 7.788  | 0.00 | 0.00 |
| ATOM | 526 | O    | ALA | 32 | 32.313 | 46.637 | 8.707  | 0.00 | 0.00 |
| ATOM | 527 | N    | GLN | 33 | 33.489 | 47.771 | 7.221  | 0.00 | 0.00 |
| ATOM | 528 | H    | GLN | 33 | 33.459 | 48.414 | 6.472  | 0.00 | 0.00 |
| ATOM | 529 | CA   | GLN | 33 | 34.782 | 47.250 | 7.650  | 0.00 | 0.00 |
| ATOM | 530 | HA   | GLN | 33 | 34.666 | 46.185 | 7.764  | 0.00 | 0.00 |
| ATOM | 531 | CB   | GLN | 33 | 35.811 | 47.515 | 6.559  | 0.00 | 0.00 |
| ATOM | 532 | HB2  | GLN | 33 | 35.408 | 47.237 | 5.616  | 0.00 | 0.00 |
| ATOM | 533 | HB3  | GLN | 33 | 36.023 | 48.553 | 6.513  | 0.00 | 0.00 |
| ATOM | 534 | CG   | GLN | 33 | 37.116 | 46.781 | 6.736  | 0.00 | 0.00 |
| ATOM | 535 | HG2  | GLN | 33 | 37.784 | 47.061 | 5.993  | 0.00 | 0.00 |
| ATOM | 536 | HG3  | GLN | 33 | 37.554 | 47.043 | 7.627  | 0.00 | 0.00 |
| ATOM | 537 | CD   | GLN | 33 | 37.000 | 45.342 | 6.693  | 0.00 | 0.00 |
| ATOM | 538 | OE1  | GLN | 33 | 36.363 | 44.722 | 6.168  | 0.00 | 0.00 |
| ATOM | 539 | NE2  | GLN | 33 | 37.603 | 44.747 | 7.248  | 0.00 | 0.00 |
| ATOM | 540 | 1HE2 | GLN | 33 | 38.130 | 45.231 | 7.699  | 0.00 | 0.00 |
| ATOM | 541 | 2HE2 | GLN | 33 | 37.509 | 43.818 | 7.247  | 0.00 | 0.00 |
| ATOM | 542 | C    | GLN | 33 | 35.221 | 47.784 | 9.015  | 0.00 | 0.00 |
| ATOM | 543 | O    | GLN | 33 | 35.794 | 47.054 | 9.796  | 0.00 | 0.00 |
| ATOM | 544 | N    | ASP | 34 | 34.881 | 49.018 | 9.362  | 0.00 | 0.00 |
| ATOM | 545 | H    | ASP | 34 | 34.478 | 49.603 | 8.673  | 0.00 | 0.00 |
| ATOM | 546 | CA   | ASP | 34 | 35.033 | 49.532 | 10.721 | 0.00 | 0.00 |
| ATOM | 547 | HA   | ASP | 34 | 36.015 | 49.295 | 11.086 | 0.00 | 0.00 |
| ATOM | 548 | CB   | ASP | 34 | 34.863 | 51.037 | 10.745 | 0.00 | 0.00 |
| ATOM | 549 | HB2  | ASP | 34 | 33.954 | 51.297 | 10.260 | 0.00 | 0.00 |
| ATOM | 550 | HB3  | ASP | 34 | 34.790 | 51.355 | 11.763 | 0.00 | 0.00 |
| ATOM | 551 | CG   | ASP | 34 | 35.981 | 51.811 | 10.116 | 0.00 | 0.00 |
| ATOM | 552 | OD1  | ASP | 34 | 37.093 | 51.365 | 10.084 | 0.00 | 0.00 |
| ATOM | 553 | OD2  | ASP | 34 | 35.758 | 52.903 | 9.686  | 0.00 | 0.00 |
| ATOM | 554 | C    | ASP | 34 | 34.047 | 48.881 | 11.690 | 0.00 | 0.00 |
| ATOM | 555 | O    | ASP | 34 | 34.402 | 48.596 | 12.815 | 0.00 | 0.00 |
| ATOM | 556 | N    | THR | 35 | 32.834 | 48.566 | 11.244 | 0.00 | 0.00 |
| ATOM | 557 | H    | THR | 35 | 32.612 | 48.829 | 10.313 | 0.00 | 0.00 |
| ATOM | 558 | CA   | THR | 35 | 31.829 | 47.861 | 12.044 | 0.00 | 0.00 |
| ATOM | 559 | HA   | THR | 35 | 31.713 | 48.402 | 12.970 | 0.00 | 0.00 |
| ATOM | 560 | CB   | THR | 35 | 30.474 | 47.816 | 11.336 | 0.00 | 0.00 |
| ATOM | 561 | HB   | THR | 35 | 30.549 | 47.206 | 10.454 | 0.00 | 0.00 |
| ATOM | 562 | CG2  | THR | 35 | 29.363 | 47.267 | 12.201 | 0.00 | 0.00 |
| ATOM | 563 | 1HG2 | THR | 35 | 29.014 | 47.227 | 12.359 | 0.00 | 0.00 |
| ATOM | 564 | 2HG2 | THR | 35 | 29.088 | 47.002 | 12.351 | 0.00 | 0.00 |
| ATOM | 565 | 3HG2 | THR | 35 | 29.172 | 47.148 | 12.515 | 0.00 | 0.00 |
| ATOM | 566 | OG1  | THR | 35 | 30.065 | 49.098 | 10.959 | 0.00 | 0.00 |
| ATOM | 567 | HG1  | THR | 35 | 30.666 | 49.417 | 10.315 | 0.00 | 0.00 |
| ATOM | 568 | C    | THR | 35 | 32.277 | 46.452 | 12.401 | 0.00 | 0.00 |
| ATOM | 569 | O    | THR | 35 | 31.982 | 45.995 | 13.485 | 0.00 | 0.00 |
| ATOM | 570 | N    | GLU | 36 | 33.036 | 45.777 | 11.552 | 0.00 | 0.00 |
| ATOM | 571 | H    | GLU | 36 | 33.213 | 46.176 | 10.662 | 0.00 | 0.00 |
| ATOM | 572 | CA   | GLU | 36 | 33.650 | 44.489 | 11.868 | 0.00 | 0.00 |
| ATOM | 573 | HA   | GLU | 36 | 32.878 | 43.807 | 12.181 | 0.00 | 0.00 |
| ATOM | 574 | CB   | GLU | 36 | 34.313 | 43.931 | 10.612 | 0.00 | 0.00 |
| ATOM | 575 | HB2  | GLU | 36 | 33.650 | 44.059 | 9.783  | 0.00 | 0.00 |
| ATOM | 576 | HB3  | GLU | 36 | 35.197 | 44.488 | 10.405 | 0.00 | 0.00 |
| ATOM | 577 | CG   | GLU | 36 | 34.649 | 42.467 | 10.702 | 0.00 | 0.00 |
| ATOM | 578 | HG2  | GLU | 36 | 34.644 | 42.143 | 11.513 | 0.00 | 0.00 |
| ATOM | 579 | HG3  | GLU | 36 | 34.055 | 42.021 | 10.268 | 0.00 | 0.00 |
| ATOM | 580 | CD   | GLU | 36 | 35.795 | 42.018 | 10.247 | 0.00 | 0.00 |
| ATOM | 581 | OE1  | GLU | 36 | 35.739 | 41.474 | 9.627  | 0.00 | 0.00 |
| ATOM | 582 | OE2  | GLU | 36 | 36.780 | 42.197 | 10.494 | 0.00 | 0.00 |
| ATOM | 583 | C    | GLU | 36 | 34.655 | 44.592 | 13.024 | 0.00 | 0.00 |
| ATOM | 584 | O    | GLU | 36 | 34.687 | 43.745 | 13.891 | 0.00 | 0.00 |
| ATOM | 585 | N    | GLU | 37 | 35.428 | 45.657 | 13.090 | 0.00 | 0.00 |
| ATOM | 586 | H    | GLU | 37 | 35.321 | 46.336 | 12.383 | 0.00 | 0.00 |
| ATOM | 587 | CA   | GLU | 37 | 36.382 | 45.912 | 14.168 | 0.00 | 0.00 |
| ATOM | 588 | HA   | GLU | 37 | 36.921 | 44.996 | 14.374 | 0.00 | 0.00 |
| ATOM | 589 | CB   | GLU | 37 | 37.382 | 46.975 | 13.701 | 0.00 | 0.00 |
| ATOM | 590 | HB2  | GLU | 37 | 37.644 | 46.773 | 12.681 | 0.00 | 0.00 |
| ATOM | 591 | HB3  | GLU | 37 | 36.911 | 47.940 | 13.726 | 0.00 | 0.00 |
| ATOM | 592 | CG   | GLU | 37 | 38.655 | 47.046 | 14.523 | 0.00 | 0.00 |
| ATOM | 593 | HG2  | GLU | 37 | 39.234 | 47.882 | 14.180 | 0.00 | 0.00 |
| ATOM | 594 | HG3  | GLU | 37 | 38.398 | 47.224 | 15.546 | 0.00 | 0.00 |
| ATOM | 595 | CD   | GLU | 37 | 39.488 | 45.789 | 14.403 | 0.00 | 0.00 |
| ATOM | 596 | OE1  | GLU | 37 | 39.723 | 45.108 | 15.397 | 0.00 | 0.00 |
| ATOM | 597 | OE2  | GLU | 37 | 39.881 | 45.429 | 13.307 | 0.00 | 0.00 |
| ATOM | 598 | C    | GLU | 37 | 35.686 | 46.317 | 15.469 | 0.00 | 0.00 |
| ATOM | 599 | O    | GLU | 37 | 36.045 | 45.831 | 16.532 | 0.00 | 0.00 |
| ATOM | 600 | N    | VAL | 38 | 34.653 | 47.147 | 15.397 | 0.00 | 0.00 |
| ATOM | 601 | H    | VAL | 38 | 34.430 | 47.536 | 14.508 | 0.00 | 0.00 |
| ATOM | 602 | CA   | VAL | 38 | 33.814 | 47.517 | 16.537 | 0.00 | 0.00 |
| ATOM | 603 | HA   | VAL | 38 | 34.455 | 47.880 | 17.327 | 0.00 | 0.00 |
| ATOM | 604 | CB   | VAL | 38 | 32.829 | 48.643 | 16.174 | 0.00 | 0.00 |
| ATOM | 605 | HB   | VAL | 38 | 32.316 | 48.375 | 15.295 | 0.00 | 0.00 |
| ATOM | 606 | CG1  | VAL | 38 | 31.807 | 48.919 | 17.222 | 0.00 | 0.00 |
| ATOM | 607 | 1HG1 | VAL | 38 | 31.906 | 48.763 | 17.864 | 0.00 | 0.00 |
| ATOM | 608 | 2HG1 | VAL | 38 | 31.561 | 49.561 | 17.358 | 0.00 | 0.00 |
| ATOM | 609 | 3HG1 | VAL | 38 | 31.182 | 48.645 | 17.201 | 0.00 | 0.00 |
| ATOM | 610 | CG2  | VAL | 38 | 33.525 | 49.930 | 15.917 | 0.00 | 0.00 |
| ATOM | 611 | 1HG2 | VAL | 38 | 33.858 | 50.078 | 15.479 | 0.00 | 0.00 |
| ATOM | 612 | 2HG2 | VAL | 38 | 33.294 | 50.427 | 15.836 | 0.00 | 0.00 |
| ATOM | 613 | 3HG2 | VAL | 38 | 33.938 | 50.232 | 16.235 | 0.00 | 0.00 |
| ATOM | 614 | C    | VAL | 38 | 33.076 | 46.305 | 17.090 | 0.00 | 0.00 |
| ATOM | 615 | O    | VAL | 38 | 33.083 | 46.116 | 18.292 | 0.00 | 0.00 |
| ATOM | 616 | N    | PHE | 39 | 32.475 | 45.466 | 16.251 | 0.00 | 0.00 |
| ATOM | 617 | H    | PHE | 39 | 32.508 | 45.673 | 15.278 | 0.00 | 0.00 |
| ATOM | 618 | CA   | PHE | 39 | 31.691 | 44.317 | 16.685 | 0.00 | 0.00 |
| ATOM | 619 | HA   | PHE | 39 | 30.995 | 44.661 | 17.436 | 0.00 | 0.00 |
| ATOM | 620 | CB   | PHE | 39 | 30.855 | 43.778 | 15.530 | 0.00 | 0.00 |
| ATOM | 621 | HB2  | PHE | 39 | 30.356 | 44.598 | 15.059 | 0.00 | 0.00 |
| ATOM | 622 | HB3  | PHE | 39 | 31.503 | 43.351 | 14.793 | 0.00 | 0.00 |
| ATOM | 623 | CG   | PHE | 39 | 29.813 | 42.771 | 15.921 | 0.00 | 0.00 |
| ATOM | 624 | CD1  | PHE | 39 | 29.237 | 42.457 | 15.973 | 0.00 | 0.00 |
| ATOM | 625 | HD1  | PHE | 39 | 29.532 | 42.923 | 15.748 | 0.00 | 0.00 |
| ATOM | 626 | CE1  | PHE | 39 | 28.280 | 41.529 | 16.326 | 0.00 | 0.00 |
| ATOM | 627 | HE1  | PHE | 39 | 27.854 | 41.292 | 16.372 | 0.00 | 0.00 |
| ATOM | 628 | CZ   | PHE | 39 | 27.890 | 40.912 | 16.632 | 0.00 | 0.00 |
| ATOM | 629 | HZ   | PHE | 39 | 27.167 | 40.197 | 16.900 | 0.00 | 0.00 |

|      |     |      |     |    |        |        |        |      |      |
|------|-----|------|-----|----|--------|--------|--------|------|------|
| ATOM | 630 | CE2  | PHE | 39 | 28.456 | 41.221 | 16.589 | 0.00 | 0.00 |
| ATOM | 631 | HE2  | PHE | 39 | 28.160 | 40.751 | 16.827 | 0.00 | 0.00 |
| ATOM | 632 | CD2  | PHE | 39 | 29.416 | 42.147 | 16.235 | 0.00 | 0.00 |
| ATOM | 633 | HD2  | PHE | 39 | 29.854 | 42.374 | 16.205 | 0.00 | 0.00 |
| ATOM | 634 | C    | PHE | 39 | 32.546 | 43.234 | 17.341 | 0.00 | 0.00 |
| ATOM | 635 | O    | PHE | 39 | 32.185 | 42.762 | 18.407 | 0.00 | 0.00 |
| ATOM | 636 | N    | ARG | 40 | 33.716 | 42.895 | 16.787 | 0.00 | 0.00 |
| ATOM | 637 | H    | ARG | 40 | 33.967 | 43.312 | 15.918 | 0.00 | 0.00 |
| ATOM | 638 | CA   | ARG | 40 | 34.664 | 41.974 | 17.435 | 0.00 | 0.00 |
| ATOM | 639 | HA   | ARG | 40 | 34.161 | 41.036 | 17.631 | 0.00 | 0.00 |
| ATOM | 640 | CB   | ARG | 40 | 35.882 | 41.713 | 16.540 | 0.00 | 0.00 |
| ATOM | 641 | HB2  | ARG | 40 | 36.271 | 42.647 | 16.171 | 0.00 | 0.00 |
| ATOM | 642 | HB3  | ARG | 40 | 36.645 | 41.255 | 17.145 | 0.00 | 0.00 |
| ATOM | 643 | CG   | ARG | 40 | 35.577 | 40.783 | 15.369 | 0.00 | 0.00 |
| ATOM | 644 | HG2  | ARG | 40 | 35.071 | 39.913 | 15.746 | 0.00 | 0.00 |
| ATOM | 645 | HG3  | ARG | 40 | 34.922 | 41.285 | 14.682 | 0.00 | 0.00 |
| ATOM | 646 | CD   | ARG | 40 | 36.825 | 40.311 | 14.630 | 0.00 | 0.00 |
| ATOM | 647 | HD2  | ARG | 40 | 37.599 | 40.068 | 15.334 | 0.00 | 0.00 |
| ATOM | 648 | HD3  | ARG | 40 | 36.568 | 39.404 | 14.116 | 0.00 | 0.00 |
| ATOM | 649 | NE   | ARG | 40 | 37.302 | 41.283 | 13.649 | 0.00 | 0.00 |
| ATOM | 650 | HE   | ARG | 40 | 36.932 | 41.201 | 12.734 | 0.00 | 0.00 |
| ATOM | 651 | CZ   | ARG | 40 | 38.131 | 42.281 | 13.805 | 0.00 | 0.00 |
| ATOM | 652 | NH1  | ARG | 40 | 38.745 | 42.531 | 14.907 | 0.00 | 0.00 |
| ATOM | 653 | 1HH1 | ARG | 40 | 38.709 | 41.895 | 15.667 | 0.00 | 0.00 |
| ATOM | 654 | 2HH1 | ARG | 40 | 39.270 | 43.370 | 14.994 | 0.00 | 0.00 |
| ATOM | 655 | NH2  | ARG | 40 | 38.351 | 43.080 | 12.824 | 0.00 | 0.00 |
| ATOM | 656 | 1HH2 | ARG | 40 | 37.905 | 42.914 | 11.957 | 0.00 | 0.00 |
| ATOM | 657 | 2HH2 | ARG | 40 | 38.970 | 43.848 | 12.933 | 0.00 | 0.00 |
| ATOM | 658 | C    | ARG | 40 | 35.115 | 42.486 | 18.800 | 0.00 | 0.00 |
| ATOM | 659 | O    | ARG | 40 | 35.139 | 41.733 | 19.759 | 0.00 | 0.00 |
| ATOM | 660 | N    | SER | 41 | 35.392 | 43.777 | 18.903 | 0.00 | 0.00 |
| ATOM | 661 | H    | SER | 41 | 35.350 | 44.320 | 18.073 | 0.00 | 0.00 |
| ATOM | 662 | CA   | SER | 41 | 35.772 | 44.427 | 20.151 | 0.00 | 0.00 |
| ATOM | 663 | HA   | SER | 41 | 36.586 | 43.868 | 20.593 | 0.00 | 0.00 |
| ATOM | 664 | CB   | SER | 41 | 36.278 | 45.840 | 19.883 | 0.00 | 0.00 |
| ATOM | 665 | HB2  | SER | 41 | 35.474 | 46.461 | 19.536 | 0.00 | 0.00 |
| ATOM | 666 | HB3  | SER | 41 | 36.656 | 46.252 | 20.801 | 0.00 | 0.00 |
| ATOM | 667 | OG   | SER | 41 | 37.288 | 45.848 | 18.910 | 0.00 | 0.00 |
| ATOM | 668 | HG   | SER | 41 | 36.877 | 45.864 | 18.077 | 0.00 | 0.00 |
| ATOM | 669 | C    | SER | 41 | 34.624 | 44.446 | 21.161 | 0.00 | 0.00 |
| ATOM | 670 | O    | SER | 41 | 34.822 | 44.128 | 22.320 | 0.00 | 0.00 |
| ATOM | 671 | N    | TYR | 42 | 33.404 | 44.755 | 20.726 | 0.00 | 0.00 |
| ATOM | 672 | H    | TYR | 42 | 33.302 | 45.018 | 19.770 | 0.00 | 0.00 |
| ATOM | 673 | CA   | TYR | 42 | 32.191 | 44.737 | 21.538 | 0.00 | 0.00 |
| ATOM | 674 | HA   | TYR | 42 | 32.322 | 45.405 | 22.379 | 0.00 | 0.00 |
| ATOM | 675 | CB   | TYR | 42 | 31.021 | 45.255 | 20.704 | 0.00 | 0.00 |
| ATOM | 676 | HB2  | TYR | 42 | 31.155 | 46.303 | 20.554 | 0.00 | 0.00 |
| ATOM | 677 | HB3  | TYR | 42 | 31.053 | 44.795 | 19.740 | 0.00 | 0.00 |
| ATOM | 678 | CG   | TYR | 42 | 29.643 | 45.013 | 21.266 | 0.00 | 0.00 |
| ATOM | 679 | CD1  | TYR | 42 | 29.177 | 45.751 | 22.278 | 0.00 | 0.00 |
| ATOM | 680 | HD1  | TYR | 42 | 29.806 | 46.485 | 22.665 | 0.00 | 0.00 |
| ATOM | 681 | CE1  | TYR | 42 | 27.900 | 45.529 | 22.776 | 0.00 | 0.00 |
| ATOM | 682 | HE1  | TYR | 42 | 27.547 | 46.101 | 23.535 | 0.00 | 0.00 |
| ATOM | 683 | CZ   | TYR | 42 | 27.087 | 44.556 | 22.273 | 0.00 | 0.00 |
| ATOM | 684 | OH   | TYR | 42 | 25.857 | 44.340 | 22.742 | 0.00 | 0.00 |
| ATOM | 685 | HH   | TYR | 42 | 25.646 | 44.896 | 23.377 | 0.00 | 0.00 |
| ATOM | 686 | CE2  | TYR | 42 | 27.550 | 43.817 | 21.262 | 0.00 | 0.00 |
| ATOM | 687 | HE2  | TYR | 42 | 26.919 | 43.082 | 20.873 | 0.00 | 0.00 |
| ATOM | 688 | CD2  | TYR | 42 | 28.824 | 44.042 | 20.752 | 0.00 | 0.00 |
| ATOM | 689 | HD2  | TYR | 42 | 29.172 | 43.474 | 19.971 | 0.00 | 0.00 |
| ATOM | 690 | C    | TYR | 42 | 31.905 | 43.352 | 22.114 | 0.00 | 0.00 |
| ATOM | 691 | O    | TYR | 42 | 31.702 | 43.240 | 23.310 | 0.00 | 0.00 |
| ATOM | 692 | N    | VAL | 43 | 31.961 | 42.292 | 21.313 | 0.00 | 0.00 |
| ATOM | 693 | H    | VAL | 43 | 32.141 | 42.444 | 20.345 | 0.00 | 0.00 |
| ATOM | 694 | CA   | VAL | 43 | 31.734 | 40.907 | 21.768 | 0.00 | 0.00 |
| ATOM | 695 | HA   | VAL | 43 | 30.770 | 40.869 | 22.258 | 0.00 | 0.00 |
| ATOM | 696 | CB   | VAL | 43 | 31.702 | 39.929 | 20.577 | 0.00 | 0.00 |
| ATOM | 697 | HB   | VAL | 43 | 32.579 | 40.086 | 19.973 | 0.00 | 0.00 |
| ATOM | 698 | CG1  | VAL | 43 | 31.669 | 38.464 | 20.994 | 0.00 | 0.00 |
| ATOM | 699 | 1HG1 | VAL | 43 | 31.283 | 38.156 | 21.285 | 0.00 | 0.00 |
| ATOM | 700 | 2HG1 | VAL | 43 | 31.680 | 37.980 | 20.675 | 0.00 | 0.00 |
| ATOM | 701 | 3HG1 | VAL | 43 | 32.029 | 38.157 | 21.314 | 0.00 | 0.00 |
| ATOM | 702 | CG2  | VAL | 43 | 30.483 | 40.162 | 19.697 | 0.00 | 0.00 |
| ATOM | 703 | 1HG2 | VAL | 43 | 30.153 | 40.172 | 19.496 | 0.00 | 0.00 |
| ATOM | 704 | 2HG2 | VAL | 43 | 30.190 | 40.274 | 19.503 | 0.00 | 0.00 |
| ATOM | 705 | 3HG2 | VAL | 43 | 30.215 | 40.212 | 19.416 | 0.00 | 0.00 |
| ATOM | 706 | C    | VAL | 43 | 32.768 | 40.497 | 22.817 | 0.00 | 0.00 |
| ATOM | 707 | O    | VAL | 43 | 32.397 | 39.937 | 23.835 | 0.00 | 0.00 |
| ATOM | 708 | N    | PHE | 44 | 34.042 | 40.832 | 22.628 | 0.00 | 0.00 |
| ATOM | 709 | H    | PHE | 44 | 34.291 | 41.299 | 21.782 | 0.00 | 0.00 |
| ATOM | 710 | CA   | PHE | 44 | 35.084 | 40.559 | 23.611 | 0.00 | 0.00 |
| ATOM | 711 | HA   | PHE | 44 | 35.036 | 39.510 | 23.864 | 0.00 | 0.00 |
| ATOM | 712 | CB   | PHE | 44 | 36.464 | 40.818 | 23.017 | 0.00 | 0.00 |
| ATOM | 713 | HB2  | PHE | 44 | 36.574 | 40.240 | 22.119 | 0.00 | 0.00 |
| ATOM | 714 | HB3  | PHE | 44 | 36.547 | 41.852 | 22.748 | 0.00 | 0.00 |
| ATOM | 715 | CG   | PHE | 44 | 37.585 | 40.464 | 23.958 | 0.00 | 0.00 |
| ATOM | 716 | CD1  | PHE | 44 | 38.006 | 39.163 | 24.072 | 0.00 | 0.00 |
| ATOM | 717 | HD1  | PHE | 44 | 37.561 | 38.424 | 23.470 | 0.00 | 0.00 |
| ATOM | 718 | CE1  | PHE | 44 | 39.008 | 38.831 | 24.971 | 0.00 | 0.00 |
| ATOM | 719 | HE1  | PHE | 44 | 39.323 | 37.839 | 25.050 | 0.00 | 0.00 |
| ATOM | 720 | CZ   | PHE | 44 | 39.591 | 39.794 | 25.764 | 0.00 | 0.00 |
| ATOM | 721 | HZ   | PHE | 44 | 40.351 | 39.536 | 26.457 | 0.00 | 0.00 |
| ATOM | 722 | CE2  | PHE | 44 | 39.179 | 41.089 | 25.646 | 0.00 | 0.00 |
| ATOM | 723 | HE2  | PHE | 44 | 39.630 | 41.828 | 26.245 | 0.00 | 0.00 |
| ATOM | 724 | CD2  | PHE | 44 | 38.176 | 41.425 | 24.753 | 0.00 | 0.00 |
| ATOM | 725 | HD2  | PHE | 44 | 37.868 | 42.425 | 24.675 | 0.00 | 0.00 |
| ATOM | 726 | C    | PHE | 44 | 34.876 | 41.335 | 24.918 | 0.00 | 0.00 |
| ATOM | 727 | O    | PHE | 44 | 34.867 | 40.734 | 25.984 | 0.00 | 0.00 |
| ATOM | 728 | N    | TYR | 45 | 34.662 | 42.643 | 24.867 | 0.00 | 0.00 |
| ATOM | 729 | H    | TYR | 45 | 34.673 | 43.096 | 23.980 | 0.00 | 0.00 |
| ATOM | 730 | CA   | TYR | 45 | 34.528 | 43.465 | 26.074 | 0.00 | 0.00 |
| ATOM | 731 | HA   | TYR | 45 | 35.301 | 43.148 | 26.763 | 0.00 | 0.00 |
| ATOM | 732 | CB   | TYR | 45 | 34.778 | 44.942 | 25.759 | 0.00 | 0.00 |
| ATOM | 733 | HB2  | TYR | 45 | 34.135 | 45.248 | 24.951 | 0.00 | 0.00 |
| ATOM | 734 | HB3  | TYR | 45 | 34.507 | 45.519 | 26.625 | 0.00 | 0.00 |



|      |     |      |     |    |        |        |        |      |      |
|------|-----|------|-----|----|--------|--------|--------|------|------|
| ATOM | 735 | CG   | TYR | 45 | 36.216 | 45.269 | 25.420 | 0.00 | 0.00 |
| ATOM | 736 | CD1  | TYR | 45 | 37.237 | 44.933 | 26.306 | 0.00 | 0.00 |
| ATOM | 737 | HD1  | TYR | 45 | 37.013 | 44.445 | 27.227 | 0.00 | 0.00 |
| ATOM | 738 | CE1  | TYR | 45 | 38.562 | 45.235 | 26.003 | 0.00 | 0.00 |
| ATOM | 739 | HE1  | TYR | 45 | 39.331 | 44.967 | 26.684 | 0.00 | 0.00 |
| ATOM | 740 | CZ   | TYR | 45 | 38.875 | 45.897 | 24.815 | 0.00 | 0.00 |
| ATOM | 741 | OH   | TYR | 45 | 40.146 | 46.220 | 24.526 | 0.00 | 0.00 |
| ATOM | 742 | HH   | TYR | 45 | 40.733 | 45.916 | 25.180 | 0.00 | 0.00 |
| ATOM | 743 | CE2  | TYR | 45 | 37.858 | 46.244 | 23.933 | 0.00 | 0.00 |
| ATOM | 744 | HE2  | TYR | 45 | 38.109 | 46.758 | 23.036 | 0.00 | 0.00 |
| ATOM | 745 | CD2  | TYR | 45 | 36.535 | 45.931 | 24.235 | 0.00 | 0.00 |
| ATOM | 746 | HD2  | TYR | 45 | 35.769 | 46.195 | 23.548 | 0.00 | 0.00 |
| ATOM | 747 | C    | TYR | 45 | 33.209 | 43.239 | 26.819 | 0.00 | 0.00 |
| ATOM | 748 | O    | TYR | 45 | 33.221 | 43.227 | 28.042 | 0.00 | 0.00 |
| ATOM | 749 | N    | ARG | 46 | 32.109 | 42.938 | 26.121 | 0.00 | 0.00 |
| ATOM | 750 | H    | ARG | 46 | 32.155 | 42.988 | 25.125 | 0.00 | 0.00 |
| ATOM | 751 | CA   | ARG | 46 | 30.841 | 42.515 | 26.731 | 0.00 | 0.00 |
| ATOM | 752 | HA   | ARG | 46 | 30.570 | 43.251 | 27.476 | 0.00 | 0.00 |
| ATOM | 753 | CB   | ARG | 46 | 29.746 | 42.498 | 25.655 | 0.00 | 0.00 |
| ATOM | 754 | HB2  | ARG | 46 | 29.639 | 43.491 | 25.255 | 0.00 | 0.00 |
| ATOM | 755 | HB3  | ARG | 46 | 30.062 | 41.855 | 24.851 | 0.00 | 0.00 |
| ATOM | 756 | CG   | ARG | 46 | 28.366 | 42.017 | 26.099 | 0.00 | 0.00 |
| ATOM | 757 | HG2  | ARG | 46 | 27.705 | 42.075 | 25.255 | 0.00 | 0.00 |
| ATOM | 758 | HG3  | ARG | 46 | 28.444 | 40.978 | 26.368 | 0.00 | 0.00 |
| ATOM | 759 | CD   | ARG | 46 | 27.736 | 42.767 | 27.258 | 0.00 | 0.00 |
| ATOM | 760 | HD2  | ARG | 46 | 28.431 | 42.848 | 28.071 | 0.00 | 0.00 |
| ATOM | 761 | HD3  | ARG | 46 | 27.488 | 43.759 | 26.944 | 0.00 | 0.00 |
| ATOM | 762 | NE   | ARG | 46 | 26.531 | 42.086 | 27.726 | 0.00 | 0.00 |
| ATOM | 763 | HE   | ARG | 46 | 25.665 | 42.412 | 27.386 | 0.00 | 0.00 |
| ATOM | 764 | CZ   | ARG | 46 | 26.466 | 41.056 | 28.528 | 0.00 | 0.00 |
| ATOM | 765 | NH1  | ARG | 46 | 27.496 | 40.529 | 29.081 | 0.00 | 0.00 |
| ATOM | 766 | 1HH1 | ARG | 46 | 28.393 | 40.903 | 28.918 | 0.00 | 0.00 |
| ATOM | 767 | 2HH1 | ARG | 46 | 27.390 | 39.780 | 29.716 | 0.00 | 0.00 |
| ATOM | 768 | NH2  | ARG | 46 | 25.335 | 40.517 | 28.780 | 0.00 | 0.00 |
| ATOM | 769 | 1HH2 | ARG | 46 | 24.527 | 40.860 | 28.332 | 0.00 | 0.00 |
| ATOM | 770 | 2HH2 | ARG | 46 | 25.275 | 39.753 | 29.392 | 0.00 | 0.00 |
| ATOM | 771 | C    | ARG | 46 | 30.971 | 41.187 | 27.479 | 0.00 | 0.00 |
| ATOM | 772 | O    | ARG | 46 | 30.309 | 41.005 | 28.482 | 0.00 | 0.00 |
| ATOM | 773 | N    | HIP | 47 | 31.870 | 40.307 | 27.055 | 0.00 | 0.00 |
| ATOM | 774 | H    | HIP | 47 | 32.332 | 40.512 | 26.200 | 0.00 | 0.00 |
| ATOM | 775 | CA   | HIP | 47 | 32.239 | 39.084 | 27.772 | 0.00 | 0.00 |
| ATOM | 776 | HA   | HIP | 47 | 31.352 | 38.680 | 28.245 | 0.00 | 0.00 |
| ATOM | 777 | CB   | HIP | 47 | 32.732 | 38.053 | 26.752 | 0.00 | 0.00 |
| ATOM | 778 | HB2  | HIP | 47 | 32.009 | 37.976 | 25.959 | 0.00 | 0.00 |
| ATOM | 779 | HB3  | HIP | 47 | 33.655 | 38.386 | 26.309 | 0.00 | 0.00 |
| ATOM | 780 | CG   | HIP | 47 | 32.941 | 36.681 | 27.309 | 0.00 | 0.00 |
| ATOM | 781 | ND1  | HIP | 47 | 34.139 | 36.099 | 27.584 | 0.00 | 0.00 |
| ATOM | 782 | HD1  | HIP | 47 | 35.017 | 36.540 | 27.494 | 0.00 | 0.00 |
| ATOM | 783 | CE1  | HIP | 47 | 33.912 | 34.860 | 28.012 | 0.00 | 0.00 |
| ATOM | 784 | HE1  | HIP | 47 | 34.648 | 34.169 | 28.326 | 0.00 | 0.00 |
| ATOM | 785 | NE2  | HIP | 47 | 32.610 | 34.635 | 28.008 | 0.00 | 0.00 |
| ATOM | 786 | HE2  | HIP | 47 | 32.170 | 33.804 | 28.309 | 0.00 | 0.00 |
| ATOM | 787 | CD2  | HIP | 47 | 31.985 | 35.767 | 27.566 | 0.00 | 0.00 |
| ATOM | 788 | HD2  | HIP | 47 | 30.946 | 35.903 | 27.451 | 0.00 | 0.00 |
| ATOM | 789 | C    | HIP | 47 | 33.247 | 39.339 | 28.902 | 0.00 | 0.00 |
| ATOM | 790 | O    | HIP | 47 | 33.081 | 38.807 | 29.975 | 0.00 | 0.00 |
| ATOM | 791 | N    | GLN | 48 | 34.237 | 40.199 | 28.706 | 0.00 | 0.00 |
| ATOM | 792 | H    | GLN | 48 | 34.341 | 40.573 | 27.796 | 0.00 | 0.00 |
| ATOM | 793 | CA   | GLN | 48 | 35.277 | 40.513 | 29.691 | 0.00 | 0.00 |
| ATOM | 794 | HA   | GLN | 48 | 35.692 | 39.584 | 30.059 | 0.00 | 0.00 |
| ATOM | 795 | CB   | GLN | 48 | 36.419 | 41.289 | 29.024 | 0.00 | 0.00 |
| ATOM | 796 | HB2  | GLN | 48 | 36.783 | 40.728 | 28.190 | 0.00 | 0.00 |
| ATOM | 797 | HB3  | GLN | 48 | 36.050 | 42.223 | 28.659 | 0.00 | 0.00 |
| ATOM | 798 | CG   | GLN | 48 | 37.579 | 41.557 | 29.972 | 0.00 | 0.00 |
| ATOM | 799 | HG2  | GLN | 48 | 37.258 | 42.192 | 30.751 | 0.00 | 0.00 |
| ATOM | 800 | HG3  | GLN | 48 | 37.883 | 40.647 | 30.410 | 0.00 | 0.00 |
| ATOM | 801 | CD   | GLN | 48 | 38.767 | 42.212 | 29.325 | 0.00 | 0.00 |
| ATOM | 802 | OE1  | GLN | 48 | 38.757 | 43.339 | 28.962 | 0.00 | 0.00 |
| ATOM | 803 | NE2  | GLN | 48 | 39.839 | 41.544 | 29.178 | 0.00 | 0.00 |
| ATOM | 804 | 1HE2 | GLN | 48 | 40.600 | 41.970 | 28.726 | 0.00 | 0.00 |
| ATOM | 805 | 2HE2 | GLN | 48 | 39.892 | 40.619 | 29.490 | 0.00 | 0.00 |
| ATOM | 806 | C    | GLN | 48 | 34.737 | 41.273 | 30.910 | 0.00 | 0.00 |
| ATOM | 807 | O    | GLN | 48 | 35.119 | 40.970 | 32.027 | 0.00 | 0.00 |
| ATOM | 808 | N    | GLN | 49 | 33.823 | 42.219 | 30.736 | 0.00 | 0.00 |
| ATOM | 809 | H    | GLN | 49 | 33.556 | 42.454 | 29.805 | 0.00 | 0.00 |
| ATOM | 810 | CA   | GLN | 49 | 33.332 | 43.055 | 31.833 | 0.00 | 0.00 |
| ATOM | 811 | HA   | GLN | 49 | 34.199 | 43.444 | 32.347 | 0.00 | 0.00 |
| ATOM | 812 | CB   | GLN | 49 | 32.577 | 44.264 | 31.273 | 0.00 | 0.00 |
| ATOM | 813 | HB2  | GLN | 49 | 32.433 | 44.982 | 32.059 | 0.00 | 0.00 |
| ATOM | 814 | HB3  | GLN | 49 | 33.189 | 44.725 | 30.519 | 0.00 | 0.00 |
| ATOM | 815 | CG   | GLN | 49 | 31.207 | 43.937 | 30.696 | 0.00 | 0.00 |
| ATOM | 816 | HG2  | GLN | 49 | 31.281 | 43.100 | 30.038 | 0.00 | 0.00 |
| ATOM | 817 | HG3  | GLN | 49 | 30.550 | 43.664 | 31.492 | 0.00 | 0.00 |
| ATOM | 818 | CD   | GLN | 49 | 30.567 | 45.067 | 29.926 | 0.00 | 0.00 |
| ATOM | 819 | OE1  | GLN | 49 | 31.156 | 46.034 | 29.543 | 0.00 | 0.00 |
| ATOM | 820 | NE2  | GLN | 49 | 29.315 | 44.974 | 29.657 | 0.00 | 0.00 |
| ATOM | 821 | 1HE2 | GLN | 49 | 28.888 | 45.688 | 29.116 | 0.00 | 0.00 |
| ATOM | 822 | 2HE2 | GLN | 49 | 28.800 | 44.231 | 30.050 | 0.00 | 0.00 |
| ATOM | 823 | C    | GLN | 49 | 32.532 | 42.283 | 32.889 | 0.00 | 0.00 |
| ATOM | 824 | O    | GLN | 49 | 32.493 | 42.685 | 34.033 | 0.00 | 0.00 |
| ATOM | 825 | N    | GLU | 50 | 31.963 | 41.137 | 32.542 | 0.00 | 0.00 |
| ATOM | 826 | H    | GLU | 50 | 32.015 | 40.865 | 31.592 | 0.00 | 0.00 |
| ATOM | 827 | CA   | GLU | 50 | 31.346 | 40.212 | 33.484 | 0.00 | 0.00 |
| ATOM | 828 | HA   | GLU | 50 | 30.763 | 40.777 | 34.183 | 0.00 | 0.00 |
| ATOM | 829 | CB   | GLU | 50 | 30.394 | 39.295 | 32.746 | 0.00 | 0.00 |
| ATOM | 830 | HB2  | GLU | 50 | 30.452 | 39.035 | 32.391 | 0.00 | 0.00 |
| ATOM | 831 | HB3  | GLU | 50 | 30.194 | 38.934 | 32.891 | 0.00 | 0.00 |
| ATOM | 832 | CG   | GLU | 50 | 29.621 | 39.190 | 32.302 | 0.00 | 0.00 |
| ATOM | 833 | HG2  | GLU | 50 | 29.596 | 39.468 | 32.459 | 0.00 | 0.00 |
| ATOM | 834 | HG3  | GLU | 50 | 29.854 | 39.354 | 32.149 | 0.00 | 0.00 |
| ATOM | 835 | CD   | GLU | 50 | 28.582 | 38.480 | 31.848 | 0.00 | 0.00 |
| ATOM | 836 | OE1  | GLU | 50 | 28.300 | 38.011 | 31.684 | 0.00 | 0.00 |
| ATOM | 837 | OE2  | GLU | 50 | 28.016 | 38.388 | 31.642 | 0.00 | 0.00 |
| ATOM | 838 | C    | GLU | 50 | 32.361 | 39.413 | 34.309 | 0.00 | 0.00 |
| ATOM | 839 | O    | GLU | 50 | 32.050 | 38.944 | 35.375 | 0.00 | 0.00 |

|      |     |      |     |    |        |        |        |      |      |
|------|-----|------|-----|----|--------|--------|--------|------|------|
| ATOM | 840 | N    | GLN | 51 | 33.592 | 39.299 | 33.851 | 0.00 | 0.00 |
| ATOM | 841 | H    | GLN | 51 | 33.780 | 39.726 | 32.981 | 0.00 | 0.00 |
| ATOM | 842 | CA   | GLN | 51 | 34.723 | 38.718 | 34.578 | 0.00 | 0.00 |
| ATOM | 843 | HA   | GLN | 51 | 34.353 | 37.966 | 35.259 | 0.00 | 0.00 |
| ATOM | 844 | CB   | GLN | 51 | 35.687 | 38.042 | 33.596 | 0.00 | 0.00 |
| ATOM | 845 | HB2  | GLN | 51 | 36.098 | 38.776 | 32.943 | 0.00 | 0.00 |
| ATOM | 846 | HB3  | GLN | 51 | 36.492 | 37.609 | 34.146 | 0.00 | 0.00 |
| ATOM | 847 | CG   | GLN | 51 | 35.037 | 36.950 | 32.768 | 0.00 | 0.00 |
| ATOM | 848 | HG2  | GLN | 51 | 34.663 | 36.217 | 33.417 | 0.00 | 0.00 |
| ATOM | 849 | HG3  | GLN | 51 | 34.223 | 37.347 | 32.232 | 0.00 | 0.00 |
| ATOM | 850 | CD   | GLN | 51 | 35.957 | 36.290 | 31.776 | 0.00 | 0.00 |
| ATOM | 851 | OE1  | GLN | 51 | 37.044 | 36.602 | 31.594 | 0.00 | 0.00 |
| ATOM | 852 | NE2  | GLN | 51 | 35.546 | 35.359 | 31.085 | 0.00 | 0.00 |
| ATOM | 853 | 1HE2 | GLN | 51 | 36.136 | 34.882 | 30.453 | 0.00 | 0.00 |
| ATOM | 854 | 2HE2 | GLN | 51 | 34.660 | 35.090 | 31.241 | 0.00 | 0.00 |
| ATOM | 855 | C    | GLN | 51 | 35.442 | 39.773 | 35.428 | 0.00 | 0.00 |
| ATOM | 856 | O    | GLN | 51 | 35.903 | 39.474 | 36.511 | 0.00 | 0.00 |
| ATOM | 857 | N    | GLU | 52 | 35.473 | 41.029 | 35.000 | 0.00 | 0.00 |
| ATOM | 858 | H    | GLU | 52 | 35.125 | 41.204 | 34.089 | 0.00 | 0.00 |
| ATOM | 859 | CA   | GLU | 52 | 35.958 | 42.170 | 35.790 | 0.00 | 0.00 |
| ATOM | 860 | HA   | GLU | 52 | 36.948 | 41.946 | 36.155 | 0.00 | 0.00 |
| ATOM | 861 | CB   | GLU | 52 | 36.029 | 43.438 | 34.939 | 0.00 | 0.00 |
| ATOM | 862 | HB2  | GLU | 52 | 35.067 | 43.617 | 34.493 | 0.00 | 0.00 |
| ATOM | 863 | HB3  | GLU | 52 | 36.255 | 44.272 | 35.579 | 0.00 | 0.00 |
| ATOM | 864 | CG   | GLU | 52 | 37.089 | 43.371 | 33.853 | 0.00 | 0.00 |
| ATOM | 865 | HG2  | GLU | 52 | 38.030 | 43.155 | 34.307 | 0.00 | 0.00 |
| ATOM | 866 | HG3  | GLU | 52 | 36.856 | 42.580 | 33.176 | 0.00 | 0.00 |
| ATOM | 867 | CD   | GLU | 52 | 37.206 | 44.664 | 33.078 | 0.00 | 0.00 |
| ATOM | 868 | OE1  | GLU | 52 | 36.267 | 45.113 | 32.463 | 0.00 | 0.00 |
| ATOM | 869 | OE2  | GLU | 52 | 38.252 | 45.255 | 33.055 | 0.00 | 0.00 |
| ATOM | 870 | C    | GLU | 52 | 35.095 | 42.445 | 37.018 | 0.00 | 0.00 |
| ATOM | 871 | O    | GLU | 52 | 35.581 | 42.948 | 38.003 | 0.00 | 0.00 |
| ATOM | 872 | N    | ALA | 53 | 33.834 | 42.052 | 36.995 | 0.00 | 0.00 |
| ATOM | 873 | H    | ALA | 53 | 33.489 | 41.690 | 36.145 | 0.00 | 0.00 |
| ATOM | 874 | CA   | ALA | 53 | 32.918 | 42.140 | 38.118 | 0.00 | 0.00 |
| ATOM | 875 | HA   | ALA | 53 | 32.873 | 43.154 | 38.439 | 0.00 | 0.00 |
| ATOM | 876 | CB   | ALA | 53 | 31.547 | 41.760 | 37.644 | 0.00 | 0.00 |
| ATOM | 877 | HB1  | ALA | 53 | 31.206 | 41.904 | 37.345 | 0.00 | 0.00 |
| ATOM | 878 | HB2  | ALA | 53 | 31.348 | 41.423 | 37.440 | 0.00 | 0.00 |
| ATOM | 879 | HB3  | ALA | 53 | 31.096 | 41.686 | 37.812 | 0.00 | 0.00 |
| ATOM | 880 | C    | ALA | 53 | 33.333 | 41.327 | 39.335 | 0.00 | 0.00 |
| ATOM | 881 | O    | ALA | 53 | 32.829 | 41.548 | 40.398 | 0.00 | 0.00 |
| ATOM | 882 | N    | GLU | 54 | 34.288 | 40.431 | 39.216 | 0.00 | 0.00 |
| ATOM | 883 | H    | GLU | 54 | 34.653 | 40.283 | 38.323 | 0.00 | 0.00 |
| ATOM | 884 | CA   | GLU | 54 | 34.882 | 39.689 | 40.316 | 0.00 | 0.00 |
| ATOM | 885 | HA   | GLU | 54 | 34.136 | 39.511 | 41.055 | 0.00 | 0.00 |
| ATOM | 886 | CB   | GLU | 54 | 35.343 | 38.343 | 39.831 | 0.00 | 0.00 |
| ATOM | 887 | HB2  | GLU | 54 | 35.811 | 38.381 | 39.111 | 0.00 | 0.00 |
| ATOM | 888 | HB3  | GLU | 54 | 35.852 | 37.941 | 40.387 | 0.00 | 0.00 |
| ATOM | 889 | CG   | GLU | 54 | 34.502 | 37.471 | 39.576 | 0.00 | 0.00 |
| ATOM | 890 | HG2  | GLU | 54 | 34.023 | 37.482 | 40.250 | 0.00 | 0.00 |
| ATOM | 891 | HG3  | GLU | 54 | 34.048 | 37.832 | 38.984 | 0.00 | 0.00 |
| ATOM | 892 | CD   | GLU | 54 | 34.902 | 36.105 | 39.226 | 0.00 | 0.00 |
| ATOM | 893 | OE1  | GLU | 54 | 35.174 | 35.572 | 38.979 | 0.00 | 0.00 |
| ATOM | 894 | OE2  | GLU | 54 | 34.940 | 35.543 | 39.193 | 0.00 | 0.00 |
| ATOM | 895 | C    | GLU | 54 | 35.992 | 40.447 | 41.032 | 0.00 | 0.00 |
| ATOM | 896 | O    | GLU | 54 | 36.629 | 39.912 | 41.854 | 0.00 | 0.00 |
| ATOM | 897 | N    | GLY | 55 | 36.222 | 41.690 | 40.737 | 0.00 | 0.00 |
| ATOM | 898 | H    | GLY | 55 | 35.674 | 42.070 | 40.045 | 0.00 | 0.00 |
| ATOM | 899 | CA   | GLY | 55 | 37.190 | 42.550 | 41.387 | 0.00 | 0.00 |
| ATOM | 900 | HA2  | GLY | 55 | 36.822 | 43.537 | 41.374 | 0.00 | 0.00 |
| ATOM | 901 | HA3  | GLY | 55 | 37.309 | 42.263 | 42.396 | 0.00 | 0.00 |
| ATOM | 902 | C    | GLY | 55 | 38.559 | 42.583 | 40.754 | 0.00 | 0.00 |
| ATOM | 903 | O    | GLY | 55 | 39.497 | 42.849 | 41.405 | 0.00 | 0.00 |
| ATOM | 904 | N    | VAL | 56 | 38.677 | 42.299 | 39.505 | 0.00 | 0.00 |
| ATOM | 905 | H    | VAL | 56 | 37.861 | 42.142 | 39.037 | 0.00 | 0.00 |
| ATOM | 906 | CA   | VAL | 56 | 39.917 | 42.248 | 38.734 | 0.00 | 0.00 |
| ATOM | 907 | HA   | VAL | 56 | 40.716 | 42.616 | 39.349 | 0.00 | 0.00 |
| ATOM | 908 | CB   | VAL | 56 | 40.276 | 40.821 | 38.338 | 0.00 | 0.00 |
| ATOM | 909 | HB   | VAL | 56 | 41.162 | 40.858 | 37.753 | 0.00 | 0.00 |
| ATOM | 910 | CG1  | VAL | 56 | 40.584 | 39.967 | 39.531 | 0.00 | 0.00 |
| ATOM | 911 | 1HG1 | VAL | 56 | 40.746 | 39.238 | 39.434 | 0.00 | 0.00 |
| ATOM | 912 | 2HG1 | VAL | 56 | 41.174 | 40.158 | 39.942 | 0.00 | 0.00 |
| ATOM | 913 | 3HG1 | VAL | 56 | 40.078 | 39.888 | 40.081 | 0.00 | 0.00 |
| ATOM | 914 | CG2  | VAL | 56 | 39.218 | 40.133 | 37.528 | 0.00 | 0.00 |
| ATOM | 915 | 1HG2 | VAL | 56 | 39.054 | 39.753 | 37.348 | 0.00 | 0.00 |
| ATOM | 916 | 2HG2 | VAL | 56 | 38.813 | 40.037 | 37.468 | 0.00 | 0.00 |
| ATOM | 917 | 3HG2 | VAL | 56 | 39.032 | 40.090 | 37.155 | 0.00 | 0.00 |
| ATOM | 918 | C    | VAL | 56 | 39.862 | 43.150 | 37.519 | 0.00 | 0.00 |
| ATOM | 919 | O    | VAL | 56 | 38.807 | 43.472 | 37.048 | 0.00 | 0.00 |
| ATOM | 920 | N    | ALA | 57 | 40.994 | 43.546 | 36.995 | 0.00 | 0.00 |
| ATOM | 921 | H    | ALA | 57 | 41.821 | 43.265 | 37.430 | 0.00 | 0.00 |
| ATOM | 922 | CA   | ALA | 57 | 41.121 | 44.374 | 35.821 | 0.00 | 0.00 |
| ATOM | 923 | HA   | ALA | 57 | 40.172 | 44.775 | 35.567 | 0.00 | 0.00 |
| ATOM | 924 | CB   | ALA | 57 | 42.012 | 45.528 | 36.143 | 0.00 | 0.00 |
| ATOM | 925 | HB1  | ALA | 57 | 42.227 | 45.709 | 36.640 | 0.00 | 0.00 |
| ATOM | 926 | HB2  | ALA | 57 | 42.528 | 45.653 | 35.955 | 0.00 | 0.00 |
| ATOM | 927 | HB3  | ALA | 57 | 41.933 | 46.071 | 36.070 | 0.00 | 0.00 |
| ATOM | 928 | C    | ALA | 57 | 41.618 | 43.597 | 34.620 | 0.00 | 0.00 |
| ATOM | 929 | O    | ALA | 57 | 42.558 | 42.849 | 34.725 | 0.00 | 0.00 |
| ATOM | 930 | N    | ALA | 58 | 41.005 | 43.795 | 33.476 | 0.00 | 0.00 |
| ATOM | 931 | H    | ALA | 58 | 40.250 | 44.415 | 33.479 | 0.00 | 0.00 |
| ATOM | 932 | CA   | ALA | 58 | 41.359 | 43.242 | 32.188 | 0.00 | 0.00 |
| ATOM | 933 | HA   | ALA | 58 | 40.483 | 43.281 | 31.596 | 0.00 | 0.00 |
| ATOM | 934 | CB   | ALA | 58 | 42.342 | 44.171 | 31.560 | 0.00 | 0.00 |
| ATOM | 935 | HB1  | ALA | 58 | 42.297 | 44.623 | 31.441 | 0.00 | 0.00 |
| ATOM | 936 | HB2  | ALA | 58 | 42.611 | 44.204 | 31.103 | 0.00 | 0.00 |
| ATOM | 937 | HB3  | ALA | 58 | 42.809 | 44.372 | 31.665 | 0.00 | 0.00 |
| ATOM | 938 | C    | ALA | 58 | 41.781 | 41.771 | 32.152 | 0.00 | 0.00 |
| ATOM | 939 | O    | ALA | 58 | 42.835 | 41.470 | 31.642 | 0.00 | 0.00 |
| ATOM | 940 | N    | PRO | 59 | 41.011 | 40.830 | 32.680 | 0.00 | 0.00 |
| ATOM | 941 | CD   | PRO | 59 | 39.727 | 41.005 | 33.280 | 0.00 | 0.00 |
| ATOM | 942 | HD2  | PRO | 59 | 39.084 | 41.570 | 32.654 | 0.00 | 0.00 |
| ATOM | 943 | HD3  | PRO | 59 | 39.835 | 41.482 | 34.234 | 0.00 | 0.00 |
| ATOM | 944 | CG   | PRO | 59 | 39.162 | 39.633 | 33.488 | 0.00 | 0.00 |

|      |      |      |     |    |        |        |        |      |      |
|------|------|------|-----|----|--------|--------|--------|------|------|
| ATOM | 945  | HG2  | PRO | 59 | 38.617 | 39.325 | 32.621 | 0.00 | 0.00 |
| ATOM | 946  | HG3  | PRO | 59 | 38.555 | 39.590 | 34.363 | 0.00 | 0.00 |
| ATOM | 947  | CB   | PRO | 59 | 40.386 | 38.793 | 33.636 | 0.00 | 0.00 |
| ATOM | 948  | HB2  | PRO | 59 | 40.735 | 38.868 | 34.640 | 0.00 | 0.00 |
| ATOM | 949  | HB3  | PRO | 59 | 40.197 | 37.781 | 33.375 | 0.00 | 0.00 |
| ATOM | 950  | CA   | PRO | 59 | 41.375 | 39.437 | 32.709 | 0.00 | 0.00 |
| ATOM | 951  | HA   | PRO | 59 | 42.354 | 39.330 | 33.119 | 0.00 | 0.00 |
| ATOM | 952  | C    | PRO | 59 | 41.348 | 38.795 | 31.325 | 0.00 | 0.00 |
| ATOM | 953  | O    | PRO | 59 | 40.464 | 39.033 | 30.538 | 0.00 | 0.00 |
| ATOM | 954  | N    | ALA | 60 | 42.294 | 37.945 | 31.037 | 0.00 | 0.00 |
| ATOM | 955  | H    | ALA | 60 | 42.972 | 37.789 | 31.719 | 0.00 | 0.00 |
| ATOM | 956  | CA   | ALA | 60 | 42.346 | 37.141 | 29.835 | 0.00 | 0.00 |
| ATOM | 957  | HA   | ALA | 60 | 41.979 | 37.710 | 29.023 | 0.00 | 0.00 |
| ATOM | 958  | CB   | ALA | 60 | 43.769 | 36.820 | 29.557 | 0.00 | 0.00 |
| ATOM | 959  | HB1  | ALA | 60 | 44.098 | 36.791 | 29.348 | 0.00 | 0.00 |
| ATOM | 960  | HB2  | ALA | 60 | 44.179 | 36.832 | 29.588 | 0.00 | 0.00 |
| ATOM | 961  | HB3  | ALA | 60 | 44.064 | 36.601 | 29.524 | 0.00 | 0.00 |
| ATOM | 962  | C    | ALA | 60 | 41.493 | 35.895 | 29.930 | 0.00 | 0.00 |
| ATOM | 963  | O    | ALA | 60 | 41.374 | 35.341 | 30.928 | 0.00 | 0.00 |
| ATOM | 964  | N    | ASP | 61 | 40.912 | 35.432 | 28.891 | 0.00 | 0.00 |
| ATOM | 965  | H    | ASP | 61 | 41.063 | 35.915 | 28.097 | 0.00 | 0.00 |
| ATOM | 966  | CA   | ASP | 61 | 40.093 | 34.231 | 28.821 | 0.00 | 0.00 |
| ATOM | 967  | HA   | ASP | 61 | 39.887 | 33.919 | 29.818 | 0.00 | 0.00 |
| ATOM | 968  | CB   | ASP | 61 | 38.762 | 34.568 | 28.192 | 0.00 | 0.00 |
| ATOM | 969  | HB2  | ASP | 61 | 38.376 | 35.428 | 28.673 | 0.00 | 0.00 |
| ATOM | 970  | HB3  | ASP | 61 | 38.897 | 34.789 | 27.168 | 0.00 | 0.00 |
| ATOM | 971  | CG   | ASP | 61 | 37.768 | 33.450 | 28.330 | 0.00 | 0.00 |
| ATOM | 972  | OD1  | ASP | 61 | 36.902 | 33.547 | 29.152 | 0.00 | 0.00 |
| ATOM | 973  | OD2  | ASP | 61 | 37.864 | 32.463 | 27.639 | 0.00 | 0.00 |
| ATOM | 974  | C    | ASP | 61 | 40.797 | 33.110 | 28.066 | 0.00 | 0.00 |
| ATOM | 975  | O    | ASP | 61 | 41.273 | 33.337 | 26.997 | 0.00 | 0.00 |
| ATOM | 976  | N    | PRO | 62 | 40.869 | 31.905 | 28.572 | 0.00 | 0.00 |
| ATOM | 977  | CD   | PRO | 62 | 40.450 | 31.536 | 29.855 | 0.00 | 0.00 |
| ATOM | 978  | HD2  | PRO | 62 | 39.448 | 31.572 | 29.951 | 0.00 | 0.00 |
| ATOM | 979  | HD3  | PRO | 62 | 40.853 | 32.132 | 30.595 | 0.00 | 0.00 |
| ATOM | 980  | CG   | PRO | 62 | 40.912 | 30.203 | 30.009 | 0.00 | 0.00 |
| ATOM | 981  | HG2  | PRO | 62 | 40.247 | 29.655 | 29.975 | 0.00 | 0.00 |
| ATOM | 982  | HG3  | PRO | 62 | 41.313 | 30.141 | 30.773 | 0.00 | 0.00 |
| ATOM | 983  | CB   | PRO | 62 | 41.756 | 29.815 | 29.012 | 0.00 | 0.00 |
| ATOM | 984  | HB2  | PRO | 62 | 42.635 | 29.821 | 29.359 | 0.00 | 0.00 |
| ATOM | 985  | HB3  | PRO | 62 | 41.555 | 28.914 | 28.735 | 0.00 | 0.00 |
| ATOM | 986  | CA   | PRO | 62 | 41.584 | 30.816 | 27.943 | 0.00 | 0.00 |
| ATOM | 987  | HA   | PRO | 62 | 42.529 | 31.164 | 27.651 | 0.00 | 0.00 |
| ATOM | 988  | C    | PRO | 62 | 40.937 | 30.197 | 26.729 | 0.00 | 0.00 |
| ATOM | 989  | O    | PRO | 62 | 41.573 | 29.449 | 26.039 | 0.00 | 0.00 |
| ATOM | 990  | N    | GLU | 63 | 39.694 | 30.474 | 26.451 | 0.00 | 0.00 |
| ATOM | 991  | H    | GLU | 63 | 39.221 | 31.102 | 27.045 | 0.00 | 0.00 |
| ATOM | 992  | CA   | GLU | 63 | 38.940 | 29.886 | 25.357 | 0.00 | 0.00 |
| ATOM | 993  | HA   | GLU | 63 | 39.554 | 29.178 | 24.837 | 0.00 | 0.00 |
| ATOM | 994  | CB   | GLU | 63 | 37.755 | 29.123 | 25.908 | 0.00 | 0.00 |
| ATOM | 995  | HB2  | GLU | 63 | 37.465 | 29.321 | 26.598 | 0.00 | 0.00 |
| ATOM | 996  | HB3  | GLU | 63 | 37.143 | 29.176 | 25.508 | 0.00 | 0.00 |
| ATOM | 997  | CG   | GLU | 63 | 37.750 | 28.029 | 26.096 | 0.00 | 0.00 |
| ATOM | 998  | HG2  | GLU | 63 | 37.863 | 27.791 | 26.076 | 0.00 | 0.00 |
| ATOM | 999  | HG3  | GLU | 63 | 37.787 | 28.211 | 26.290 | 0.00 | 0.00 |
| ATOM | 1000 | CD   | GLU | 63 | 37.508 | 26.992 | 26.053 | 0.00 | 0.00 |
| ATOM | 1001 | OE1  | GLU | 63 | 37.493 | 26.676 | 25.843 | 0.00 | 0.00 |
| ATOM | 1002 | OE2  | GLU | 63 | 37.331 | 26.473 | 26.231 | 0.00 | 0.00 |
| ATOM | 1003 | C    | GLU | 63 | 38.504 | 30.899 | 24.306 | 0.00 | 0.00 |
| ATOM | 1004 | O    | GLU | 63 | 38.472 | 30.571 | 23.135 | 0.00 | 0.00 |
| ATOM | 1005 | N    | MET | 64 | 38.265 | 32.152 | 24.671 | 0.00 | 0.00 |
| ATOM | 1006 | H    | MET | 64 | 38.278 | 32.353 | 25.639 | 0.00 | 0.00 |
| ATOM | 1007 | CA   | MET | 64 | 37.906 | 33.230 | 23.746 | 0.00 | 0.00 |
| ATOM | 1008 | HA   | MET | 64 | 37.278 | 32.787 | 22.996 | 0.00 | 0.00 |
| ATOM | 1009 | CB   | MET | 64 | 37.070 | 34.286 | 24.459 | 0.00 | 0.00 |
| ATOM | 1010 | HB2  | MET | 64 | 36.438 | 33.830 | 25.150 | 0.00 | 0.00 |
| ATOM | 1011 | HB3  | MET | 64 | 37.680 | 34.939 | 24.986 | 0.00 | 0.00 |
| ATOM | 1012 | CG   | MET | 64 | 36.215 | 35.076 | 23.549 | 0.00 | 0.00 |
| ATOM | 1013 | HG2  | MET | 64 | 36.627 | 35.642 | 23.117 | 0.00 | 0.00 |
| ATOM | 1014 | HG3  | MET | 64 | 35.918 | 34.566 | 23.013 | 0.00 | 0.00 |
| ATOM | 1015 | SD   | MET | 64 | 35.024 | 35.954 | 23.964 | 0.00 | 0.00 |
| ATOM | 1016 | CE   | MET | 64 | 33.706 | 35.381 | 23.799 | 0.00 | 0.00 |
| ATOM | 1017 | HE1  | MET | 64 | 33.522 | 35.150 | 23.784 | 0.00 | 0.00 |
| ATOM | 1018 | HE2  | MET | 64 | 33.390 | 35.325 | 23.886 | 0.00 | 0.00 |
| ATOM | 1019 | HE3  | MET | 64 | 33.403 | 35.326 | 23.632 | 0.00 | 0.00 |
| ATOM | 1020 | C    | MET | 64 | 39.111 | 33.790 | 22.986 | 0.00 | 0.00 |
| ATOM | 1021 | O    | MET | 64 | 39.132 | 34.852 | 22.575 | 0.00 | 0.00 |
| ATOM | 1022 | N    | VAL | 65 | 40.124 | 33.055 | 22.767 | 0.00 | 0.00 |
| ATOM | 1023 | H    | VAL | 65 | 40.042 | 32.201 | 23.149 | 0.00 | 0.00 |
| ATOM | 1024 | CA   | VAL | 65 | 41.338 | 33.341 | 21.996 | 0.00 | 0.00 |
| ATOM | 1025 | HA   | VAL | 65 | 41.663 | 34.331 | 22.243 | 0.00 | 0.00 |
| ATOM | 1026 | CB   | VAL | 65 | 42.464 | 32.389 | 22.377 | 0.00 | 0.00 |
| ATOM | 1027 | HB   | VAL | 65 | 43.317 | 32.626 | 21.786 | 0.00 | 0.00 |
| ATOM | 1028 | CG1  | VAL | 65 | 42.855 | 32.560 | 23.815 | 0.00 | 0.00 |
| ATOM | 1029 | 1HG1 | VAL | 65 | 42.670 | 32.623 | 24.252 | 0.00 | 0.00 |
| ATOM | 1030 | 2HG1 | VAL | 65 | 43.097 | 32.849 | 24.068 | 0.00 | 0.00 |
| ATOM | 1031 | 3HG1 | VAL | 65 | 43.089 | 32.351 | 24.165 | 0.00 | 0.00 |
| ATOM | 1032 | CG2  | VAL | 65 | 42.150 | 30.942 | 22.138 | 0.00 | 0.00 |
| ATOM | 1033 | 1HG2 | VAL | 65 | 41.959 | 30.680 | 21.772 | 0.00 | 0.00 |
| ATOM | 1034 | 2HG2 | VAL | 65 | 42.427 | 30.515 | 22.106 | 0.00 | 0.00 |
| ATOM | 1035 | 3HG2 | VAL | 65 | 41.869 | 30.558 | 22.357 | 0.00 | 0.00 |
| ATOM | 1036 | C    | VAL | 65 | 41.126 | 33.328 | 20.493 | 0.00 | 0.00 |
| ATOM | 1037 | O    | VAL | 65 | 41.968 | 33.695 | 19.749 | 0.00 | 0.00 |
| ATOM | 1038 | N    | THR | 66 | 39.992 | 32.924 | 20.030 | 0.00 | 0.00 |
| ATOM | 1039 | H    | THR | 66 | 39.344 | 32.637 | 20.691 | 0.00 | 0.00 |
| ATOM | 1040 | CA   | THR | 66 | 39.575 | 32.823 | 18.637 | 0.00 | 0.00 |
| ATOM | 1041 | HA   | THR | 66 | 40.418 | 32.516 | 18.045 | 0.00 | 0.00 |
| ATOM | 1042 | CB   | THR | 66 | 38.489 | 31.764 | 18.502 | 0.00 | 0.00 |
| ATOM | 1043 | HB   | THR | 66 | 38.123 | 31.749 | 17.499 | 0.00 | 0.00 |
| ATOM | 1044 | CG2  | THR | 66 | 38.975 | 30.382 | 18.836 | 0.00 | 0.00 |
| ATOM | 1045 | 1HG2 | THR | 66 | 39.063 | 30.031 | 18.980 | 0.00 | 0.00 |
| ATOM | 1046 | 2HG2 | THR | 66 | 39.052 | 30.014 | 18.845 | 0.00 | 0.00 |
| ATOM | 1047 | 3HG2 | THR | 66 | 39.160 | 30.076 | 18.900 | 0.00 | 0.00 |
| ATOM | 1048 | OG1  | THR | 66 | 37.453 | 32.056 | 19.365 | 0.00 | 0.00 |
| ATOM | 1049 | HG1  | THR | 66 | 36.717 | 31.582 | 19.092 | 0.00 | 0.00 |

|      |      |      |     |    |        |        |        |      |      |
|------|------|------|-----|----|--------|--------|--------|------|------|
| ATOM | 1050 | C    | THR | 66 | 39.075 | 34.129 | 18.034 | 0.00 | 0.00 |
| ATOM | 1051 | O    | THR | 66 | 38.783 | 34.173 | 16.880 | 0.00 | 0.00 |
| ATOM | 1052 | N    | LEU | 67 | 38.964 | 35.189 | 18.793 | 0.00 | 0.00 |
| ATOM | 1053 | H    | LEU | 67 | 39.231 | 35.071 | 19.713 | 0.00 | 0.00 |
| ATOM | 1054 | CA   | LEU | 67 | 38.397 | 36.469 | 18.415 | 0.00 | 0.00 |
| ATOM | 1055 | HA   | LEU | 67 | 38.001 | 36.389 | 17.422 | 0.00 | 0.00 |
| ATOM | 1056 | CB   | LEU | 67 | 37.230 | 36.740 | 19.342 | 0.00 | 0.00 |
| ATOM | 1057 | HB2  | LEU | 67 | 36.584 | 35.886 | 19.341 | 0.00 | 0.00 |
| ATOM | 1058 | HB3  | LEU | 67 | 37.596 | 36.847 | 20.329 | 0.00 | 0.00 |
| ATOM | 1059 | CG   | LEU | 67 | 36.404 | 37.951 | 19.001 | 0.00 | 0.00 |
| ATOM | 1060 | HG   | LEU | 67 | 37.024 | 38.814 | 19.022 | 0.00 | 0.00 |
| ATOM | 1061 | CD1  | LEU | 67 | 35.770 | 37.855 | 17.662 | 0.00 | 0.00 |
| ATOM | 1062 | 1HD1 | LEU | 67 | 35.685 | 37.906 | 17.326 | 0.00 | 0.00 |
| ATOM | 1063 | 2HD1 | LEU | 67 | 35.630 | 37.744 | 17.315 | 0.00 | 0.00 |
| ATOM | 1064 | 3HD1 | LEU | 67 | 35.536 | 37.856 | 17.374 | 0.00 | 0.00 |
| ATOM | 1065 | CD2  | LEU | 67 | 35.306 | 38.113 | 20.010 | 0.00 | 0.00 |
| ATOM | 1066 | 1HD2 | LEU | 67 | 35.327 | 38.113 | 20.547 | 0.00 | 0.00 |
| ATOM | 1067 | 2HD2 | LEU | 67 | 34.948 | 38.526 | 20.121 | 0.00 | 0.00 |
| ATOM | 1068 | 3HD2 | LEU | 67 | 34.861 | 37.837 | 20.104 | 0.00 | 0.00 |
| ATOM | 1069 | C    | LEU | 67 | 39.452 | 37.587 | 18.446 | 0.00 | 0.00 |
| ATOM | 1070 | O    | LEU | 67 | 39.838 | 37.997 | 19.517 | 0.00 | 0.00 |
| ATOM | 1071 | N    | PRO | 68 | 39.941 | 38.079 | 17.315 | 0.00 | 0.00 |
| ATOM | 1072 | CD   | PRO | 68 | 39.704 | 37.562 | 15.998 | 0.00 | 0.00 |
| ATOM | 1073 | HD2  | PRO | 68 | 38.707 | 37.706 | 15.705 | 0.00 | 0.00 |
| ATOM | 1074 | HD3  | PRO | 68 | 39.955 | 36.542 | 15.951 | 0.00 | 0.00 |
| ATOM | 1075 | CG   | PRO | 68 | 40.599 | 38.319 | 15.086 | 0.00 | 0.00 |
| ATOM | 1076 | HG2  | PRO | 68 | 40.070 | 38.966 | 14.575 | 0.00 | 0.00 |
| ATOM | 1077 | HG3  | PRO | 68 | 41.071 | 37.709 | 14.478 | 0.00 | 0.00 |
| ATOM | 1078 | CB   | PRO | 68 | 41.557 | 39.032 | 15.892 | 0.00 | 0.00 |
| ATOM | 1079 | HB2  | PRO | 68 | 42.408 | 38.501 | 15.906 | 0.00 | 0.00 |
| ATOM | 1080 | HB3  | PRO | 68 | 41.742 | 39.939 | 15.506 | 0.00 | 0.00 |
| ATOM | 1081 | CA   | PRO | 68 | 40.955 | 39.119 | 17.267 | 0.00 | 0.00 |
| ATOM | 1082 | HA   | PRO | 68 | 41.721 | 38.901 | 17.983 | 0.00 | 0.00 |
| ATOM | 1083 | C    | PRO | 68 | 40.406 | 40.512 | 17.542 | 0.00 | 0.00 |
| ATOM | 1084 | O    | PRO | 68 | 39.325 | 40.859 | 17.111 | 0.00 | 0.00 |
| ATOM | 1085 | N    | LEU | 69 | 41.198 | 41.339 | 18.207 | 0.00 | 0.00 |
| ATOM | 1086 | H    | LEU | 69 | 42.065 | 40.980 | 18.508 | 0.00 | 0.00 |
| ATOM | 1087 | CA   | LEU | 69 | 40.993 | 42.768 | 18.412 | 0.00 | 0.00 |
| ATOM | 1088 | HA   | LEU | 69 | 40.530 | 43.172 | 17.534 | 0.00 | 0.00 |
| ATOM | 1089 | CB   | LEU | 69 | 40.034 | 43.034 | 19.567 | 0.00 | 0.00 |
| ATOM | 1090 | HB2  | LEU | 69 | 39.785 | 44.062 | 19.536 | 0.00 | 0.00 |
| ATOM | 1091 | HB3  | LEU | 69 | 39.125 | 42.514 | 19.397 | 0.00 | 0.00 |
| ATOM | 1092 | CG   | LEU | 69 | 40.508 | 42.722 | 20.962 | 0.00 | 0.00 |
| ATOM | 1093 | HG   | LEU | 69 | 41.338 | 42.828 | 21.048 | 0.00 | 0.00 |
| ATOM | 1094 | CD1  | LEU | 69 | 40.034 | 43.424 | 21.874 | 0.00 | 0.00 |
| ATOM | 1095 | 1HD1 | LEU | 69 | 39.977 | 43.912 | 21.739 | 0.00 | 0.00 |
| ATOM | 1096 | 2HD1 | LEU | 69 | 40.241 | 43.473 | 22.494 | 0.00 | 0.00 |
| ATOM | 1097 | 3HD1 | LEU | 69 | 39.561 | 43.399 | 22.073 | 0.00 | 0.00 |
| ATOM | 1098 | CD2  | LEU | 69 | 40.290 | 41.601 | 21.411 | 0.00 | 0.00 |
| ATOM | 1099 | 1HD2 | LEU | 69 | 40.193 | 41.377 | 21.128 | 0.00 | 0.00 |
| ATOM | 1100 | 2HD2 | LEU | 69 | 40.499 | 41.234 | 21.626 | 0.00 | 0.00 |
| ATOM | 1101 | 3HD2 | LEU | 69 | 40.033 | 41.364 | 21.827 | 0.00 | 0.00 |
| ATOM | 1102 | C    | LEU | 69 | 42.320 | 43.495 | 18.577 | 0.00 | 0.00 |
| ATOM | 1103 | O    | LEU | 69 | 43.324 | 42.882 | 18.841 | 0.00 | 0.00 |
| ATOM | 1104 | N    | GLN | 70 | 42.322 | 44.803 | 18.453 | 0.00 | 0.00 |
| ATOM | 1105 | H    | GLN | 70 | 41.475 | 45.242 | 18.210 | 0.00 | 0.00 |
| ATOM | 1106 | CA   | GLN | 70 | 43.474 | 45.658 | 18.619 | 0.00 | 0.00 |
| ATOM | 1107 | HA   | GLN | 70 | 44.288 | 45.062 | 18.961 | 0.00 | 0.00 |
| ATOM | 1108 | CB   | GLN | 70 | 43.881 | 46.207 | 17.279 | 0.00 | 0.00 |
| ATOM | 1109 | HB2  | GLN | 70 | 44.124 | 45.382 | 16.670 | 0.00 | 0.00 |
| ATOM | 1110 | HB3  | GLN | 70 | 43.072 | 46.694 | 16.832 | 0.00 | 0.00 |
| ATOM | 1111 | CG   | GLN | 70 | 45.033 | 47.161 | 17.268 | 0.00 | 0.00 |
| ATOM | 1112 | HG2  | GLN | 70 | 45.308 | 47.299 | 16.330 | 0.00 | 0.00 |
| ATOM | 1113 | HG3  | GLN | 70 | 44.758 | 48.059 | 17.619 | 0.00 | 0.00 |
| ATOM | 1114 | CD   | GLN | 70 | 46.182 | 46.754 | 18.012 | 0.00 | 0.00 |
| ATOM | 1115 | OE1  | GLN | 70 | 46.331 | 46.993 | 19.073 | 0.00 | 0.00 |
| ATOM | 1116 | NE2  | GLN | 70 | 47.017 | 46.121 | 17.511 | 0.00 | 0.00 |
| ATOM | 1117 | 1HE2 | GLN | 70 | 46.902 | 45.899 | 16.647 | 0.00 | 0.00 |
| ATOM | 1118 | 2HE2 | GLN | 70 | 47.759 | 45.868 | 18.007 | 0.00 | 0.00 |
| ATOM | 1119 | C    | GLN | 70 | 43.200 | 46.757 | 19.632 | 0.00 | 0.00 |
| ATOM | 1120 | O    | GLN | 70 | 42.587 | 47.741 | 19.306 | 0.00 | 0.00 |
| ATOM | 1121 | N    | PRO | 71 | 43.654 | 46.638 | 20.850 | 0.00 | 0.00 |
| ATOM | 1122 | CD   | PRO | 71 | 44.262 | 45.477 | 21.402 | 0.00 | 0.00 |
| ATOM | 1123 | HD2  | PRO | 71 | 45.250 | 45.428 | 21.140 | 0.00 | 0.00 |
| ATOM | 1124 | HD3  | PRO | 71 | 43.780 | 44.597 | 21.116 | 0.00 | 0.00 |
| ATOM | 1125 | CG   | PRO | 71 | 44.157 | 45.625 | 22.836 | 0.00 | 0.00 |
| ATOM | 1126 | HG2  | PRO | 71 | 44.932 | 45.311 | 23.268 | 0.00 | 0.00 |
| ATOM | 1127 | HG3  | PRO | 71 | 43.406 | 45.159 | 23.151 | 0.00 | 0.00 |
| ATOM | 1128 | CB   | PRO | 71 | 43.976 | 46.999 | 23.098 | 0.00 | 0.00 |
| ATOM | 1129 | HB2  | PRO | 71 | 43.407 | 47.105 | 23.854 | 0.00 | 0.00 |
| ATOM | 1130 | HB3  | PRO | 71 | 44.823 | 47.383 | 23.300 | 0.00 | 0.00 |
| ATOM | 1131 | CA   | PRO | 71 | 43.404 | 47.607 | 21.883 | 0.00 | 0.00 |
| ATOM | 1132 | HA   | PRO | 71 | 42.372 | 47.696 | 21.999 | 0.00 | 0.00 |
| ATOM | 1133 | C    | PRO | 71 | 43.955 | 48.991 | 21.676 | 0.00 | 0.00 |
| ATOM | 1134 | O    | PRO | 71 | 43.467 | 49.931 | 22.222 | 0.00 | 0.00 |
| ATOM | 1135 | N    | SER | 72 | 44.954 | 49.133 | 20.890 | 0.00 | 0.00 |
| ATOM | 1136 | H    | SER | 72 | 45.336 | 48.331 | 20.496 | 0.00 | 0.00 |
| ATOM | 1137 | CA   | SER | 72 | 45.577 | 50.392 | 20.609 | 0.00 | 0.00 |
| ATOM | 1138 | HA   | SER | 72 | 45.559 | 50.989 | 21.470 | 0.00 | 0.00 |
| ATOM | 1139 | CB   | SER | 72 | 46.983 | 50.174 | 20.265 | 0.00 | 0.00 |
| ATOM | 1140 | HB2  | SER | 72 | 47.058 | 49.646 | 19.392 | 0.00 | 0.00 |
| ATOM | 1141 | HB3  | SER | 72 | 47.443 | 51.097 | 20.151 | 0.00 | 0.00 |
| ATOM | 1142 | OG   | SER | 72 | 47.608 | 49.475 | 21.217 | 0.00 | 0.00 |
| ATOM | 1143 | HG   | SER | 72 | 48.064 | 49.385 | 21.203 | 0.00 | 0.00 |
| ATOM | 1144 | C    | SER | 72 | 44.907 | 51.203 | 19.560 | 0.00 | 0.00 |
| ATOM | 1145 | O    | SER | 72 | 45.376 | 52.154 | 19.171 | 0.00 | 0.00 |
| ATOM | 1146 | N    | SER | 73 | 43.816 | 50.839 | 19.084 | 0.00 | 0.00 |
| ATOM | 1147 | H    | SER | 73 | 43.467 | 50.073 | 19.469 | 0.00 | 0.00 |
| ATOM | 1148 | CA   | SER | 73 | 43.063 | 51.505 | 18.071 | 0.00 | 0.00 |
| ATOM | 1149 | HA   | SER | 73 | 43.550 | 52.337 | 17.754 | 0.00 | 0.00 |
| ATOM | 1150 | CB   | SER | 73 | 42.942 | 50.617 | 16.979 | 0.00 | 0.00 |
| ATOM | 1151 | HB2  | SER | 73 | 43.144 | 49.919 | 16.834 | 0.00 | 0.00 |
| ATOM | 1152 | HB3  | SER | 73 | 42.456 | 50.487 | 16.820 | 0.00 | 0.00 |
| ATOM | 1153 | OG   | SER | 73 | 43.200 | 50.834 | 16.338 | 0.00 | 0.00 |
| ATOM | 1154 | HG   | SER | 73 | 43.387 | 50.678 | 15.797 | 0.00 | 0.00 |

|      |      |      |     |    |        |        |        |      |      |
|------|------|------|-----|----|--------|--------|--------|------|------|
| ATOM | 1155 | C    | SER | 73 | 41.755 | 52.005 | 18.492 | 0.00 | 0.00 |
| ATOM | 1156 | O    | SER | 73 | 41.170 | 51.457 | 19.380 | 0.00 | 0.00 |
| ATOM | 1157 | N    | THR | 74 | 41.261 | 53.043 | 17.849 | 0.00 | 0.00 |
| ATOM | 1158 | H    | THR | 74 | 41.783 | 53.442 | 17.131 | 0.00 | 0.00 |
| ATOM | 1159 | CA   | THR | 74 | 40.037 | 53.729 | 18.207 | 0.00 | 0.00 |
| ATOM | 1160 | HA   | THR | 74 | 40.141 | 54.098 | 19.194 | 0.00 | 0.00 |
| ATOM | 1161 | CB   | THR | 74 | 39.812 | 54.912 | 17.308 | 0.00 | 0.00 |
| ATOM | 1162 | HB   | THR | 74 | 39.187 | 54.929 | 16.920 | 0.00 | 0.00 |
| ATOM | 1163 | CG2  | THR | 74 | 39.767 | 55.924 | 17.681 | 0.00 | 0.00 |
| ATOM | 1164 | 1HG2 | THR | 74 | 39.714 | 56.134 | 17.809 | 0.00 | 0.00 |
| ATOM | 1165 | 2HG2 | THR | 74 | 39.723 | 56.266 | 17.725 | 0.00 | 0.00 |
| ATOM | 1166 | 3HG2 | THR | 74 | 39.826 | 56.124 | 17.780 | 0.00 | 0.00 |
| ATOM | 1167 | OG1  | THR | 74 | 40.453 | 55.113 | 16.587 | 0.00 | 0.00 |
| ATOM | 1168 | HG1  | THR | 74 | 40.504 | 55.499 | 16.167 | 0.00 | 0.00 |
| ATOM | 1169 | C    | THR | 74 | 38.802 | 52.850 | 18.202 | 0.00 | 0.00 |
| ATOM | 1170 | O    | THR | 74 | 37.989 | 52.984 | 19.089 | 0.00 | 0.00 |
| ATOM | 1171 | N    | MET | 75 | 38.675 | 51.907 | 17.286 | 0.00 | 0.00 |
| ATOM | 1172 | H    | MET | 75 | 39.380 | 51.821 | 16.594 | 0.00 | 0.00 |
| ATOM | 1173 | CA   | MET | 75 | 37.517 | 51.004 | 17.227 | 0.00 | 0.00 |
| ATOM | 1174 | HA   | MET | 75 | 36.628 | 51.604 | 17.324 | 0.00 | 0.00 |
| ATOM | 1175 | CB   | MET | 75 | 37.449 | 50.315 | 15.879 | 0.00 | 0.00 |
| ATOM | 1176 | HB2  | MET | 75 | 38.341 | 49.746 | 15.730 | 0.00 | 0.00 |
| ATOM | 1177 | HB3  | MET | 75 | 36.619 | 49.632 | 15.879 | 0.00 | 0.00 |
| ATOM | 1178 | CG   | MET | 75 | 37.293 | 51.280 | 14.723 | 0.00 | 0.00 |
| ATOM | 1179 | HG2  | MET | 75 | 38.167 | 51.820 | 14.615 | 0.00 | 0.00 |
| ATOM | 1180 | HG3  | MET | 75 | 37.161 | 50.729 | 13.864 | 0.00 | 0.00 |
| ATOM | 1181 | SD   | MET | 75 | 35.997 | 52.431 | 14.809 | 0.00 | 0.00 |
| ATOM | 1182 | CE   | MET | 75 | 36.357 | 53.589 | 13.756 | 0.00 | 0.00 |
| ATOM | 1183 | HE1  | MET | 75 | 36.483 | 53.785 | 13.507 | 0.00 | 0.00 |
| ATOM | 1184 | HE2  | MET | 75 | 36.335 | 53.816 | 13.523 | 0.00 | 0.00 |
| ATOM | 1185 | HE3  | MET | 75 | 36.474 | 53.871 | 13.600 | 0.00 | 0.00 |
| ATOM | 1186 | C    | MET | 75 | 37.466 | 50.004 | 18.386 | 0.00 | 0.00 |
| ATOM | 1187 | O    | MET | 75 | 36.391 | 49.628 | 18.818 | 0.00 | 0.00 |
| ATOM | 1188 | N    | GLY | 76 | 38.608 | 49.670 | 18.969 | 0.00 | 0.00 |
| ATOM | 1189 | H    | GLY | 76 | 39.445 | 49.992 | 18.548 | 0.00 | 0.00 |
| ATOM | 1190 | CA   | GLY | 76 | 38.703 | 48.959 | 20.231 | 0.00 | 0.00 |
| ATOM | 1191 | HA2  | GLY | 76 | 38.161 | 48.036 | 20.174 | 0.00 | 0.00 |
| ATOM | 1192 | HA3  | GLY | 76 | 39.736 | 48.735 | 20.409 | 0.00 | 0.00 |
| ATOM | 1193 | C    | GLY | 76 | 38.176 | 49.756 | 21.407 | 0.00 | 0.00 |
| ATOM | 1194 | O    | GLY | 76 | 37.427 | 49.238 | 22.212 | 0.00 | 0.00 |
| ATOM | 1195 | N    | GLN | 77 | 38.489 | 51.042 | 21.465 | 0.00 | 0.00 |
| ATOM | 1196 | H    | GLN | 77 | 39.087 | 51.394 | 20.760 | 0.00 | 0.00 |
| ATOM | 1197 | CA   | GLN | 77 | 38.019 | 51.959 | 22.500 | 0.00 | 0.00 |
| ATOM | 1198 | HA   | GLN | 77 | 38.159 | 51.491 | 23.461 | 0.00 | 0.00 |
| ATOM | 1199 | CB   | GLN | 77 | 38.856 | 53.227 | 22.461 | 0.00 | 0.00 |
| ATOM | 1200 | HB2  | GLN | 77 | 38.889 | 53.601 | 21.589 | 0.00 | 0.00 |
| ATOM | 1201 | HB3  | GLN | 77 | 38.480 | 53.905 | 23.010 | 0.00 | 0.00 |
| ATOM | 1202 | CG   | GLN | 77 | 40.142 | 53.105 | 22.870 | 0.00 | 0.00 |
| ATOM | 1203 | HG2  | GLN | 77 | 40.136 | 52.902 | 23.764 | 0.00 | 0.00 |
| ATOM | 1204 | HG3  | GLN | 77 | 40.483 | 52.348 | 22.449 | 0.00 | 0.00 |
| ATOM | 1205 | CD   | GLN | 77 | 41.012 | 54.260 | 22.657 | 0.00 | 0.00 |
| ATOM | 1206 | OE1  | GLN | 77 | 40.874 | 55.155 | 22.344 | 0.00 | 0.00 |
| ATOM | 1207 | NE2  | GLN | 77 | 41.933 | 54.289 | 22.812 | 0.00 | 0.00 |
| ATOM | 1208 | 1HE2 | GLN | 77 | 42.496 | 55.039 | 22.677 | 0.00 | 0.00 |
| ATOM | 1209 | 2HE2 | GLN | 77 | 42.069 | 53.566 | 23.060 | 0.00 | 0.00 |
| ATOM | 1210 | C    | GLN | 77 | 36.530 | 52.265 | 22.376 | 0.00 | 0.00 |
| ATOM | 1211 | O    | GLN | 77 | 35.841 | 52.325 | 23.375 | 0.00 | 0.00 |
| ATOM | 1212 | N    | VAL | 78 | 36.000 | 52.358 | 21.158 | 0.00 | 0.00 |
| ATOM | 1213 | H    | VAL | 78 | 36.621 | 52.356 | 20.384 | 0.00 | 0.00 |
| ATOM | 1214 | CA   | VAL | 78 | 34.555 | 52.402 | 20.898 | 0.00 | 0.00 |
| ATOM | 1215 | HA   | VAL | 78 | 34.126 | 53.206 | 21.476 | 0.00 | 0.00 |
| ATOM | 1216 | CB   | VAL | 78 | 34.254 | 52.655 | 19.414 | 0.00 | 0.00 |
| ATOM | 1217 | HB   | VAL | 78 | 34.798 | 51.946 | 18.827 | 0.00 | 0.00 |
| ATOM | 1218 | CG1  | VAL | 78 | 32.789 | 52.523 | 19.050 | 0.00 | 0.00 |
| ATOM | 1219 | 1HG1 | VAL | 78 | 32.375 | 52.432 | 19.242 | 0.00 | 0.00 |
| ATOM | 1220 | 2HG1 | VAL | 78 | 32.412 | 52.772 | 18.840 | 0.00 | 0.00 |
| ATOM | 1221 | 3HG1 | VAL | 78 | 32.505 | 52.265 | 18.767 | 0.00 | 0.00 |
| ATOM | 1222 | CG2  | VAL | 78 | 34.687 | 54.039 | 19.000 | 0.00 | 0.00 |
| ATOM | 1223 | 1HG2 | VAL | 78 | 34.740 | 54.396 | 18.964 | 0.00 | 0.00 |
| ATOM | 1224 | 2HG2 | VAL | 78 | 34.886 | 54.378 | 18.909 | 0.00 | 0.00 |
| ATOM | 1225 | 3HG2 | VAL | 78 | 34.770 | 54.349 | 18.814 | 0.00 | 0.00 |
| ATOM | 1226 | C    | VAL | 78 | 33.896 | 51.117 | 21.379 | 0.00 | 0.00 |
| ATOM | 1227 | O    | VAL | 78 | 32.930 | 51.187 | 22.113 | 0.00 | 0.00 |
| ATOM | 1228 | N    | GLY | 79 | 34.440 | 49.948 | 21.055 | 0.00 | 0.00 |
| ATOM | 1229 | H    | GLY | 79 | 35.226 | 49.949 | 20.447 | 0.00 | 0.00 |
| ATOM | 1230 | CA   | GLY | 79 | 33.937 | 48.656 | 21.505 | 0.00 | 0.00 |
| ATOM | 1231 | HA2  | GLY | 79 | 32.960 | 48.490 | 21.096 | 0.00 | 0.00 |
| ATOM | 1232 | HA3  | GLY | 79 | 34.591 | 47.892 | 21.135 | 0.00 | 0.00 |
| ATOM | 1233 | C    | GLY | 79 | 33.864 | 48.501 | 23.023 | 0.00 | 0.00 |
| ATOM | 1234 | O    | GLY | 79 | 32.880 | 47.997 | 23.534 | 0.00 | 0.00 |
| ATOM | 1235 | N    | ARG | 80 | 34.864 | 48.995 | 23.753 | 0.00 | 0.00 |
| ATOM | 1236 | H    | ARG | 80 | 35.647 | 49.362 | 23.262 | 0.00 | 0.00 |
| ATOM | 1237 | CA   | ARG | 80 | 34.919 | 49.007 | 25.222 | 0.00 | 0.00 |
| ATOM | 1238 | HA   | ARG | 80 | 34.780 | 47.996 | 25.575 | 0.00 | 0.00 |
| ATOM | 1239 | CB   | ARG | 80 | 36.305 | 49.500 | 25.662 | 0.00 | 0.00 |
| ATOM | 1240 | HB2  | ARG | 80 | 37.036 | 48.955 | 25.156 | 0.00 | 0.00 |
| ATOM | 1241 | HB3  | ARG | 80 | 36.424 | 50.498 | 25.380 | 0.00 | 0.00 |
| ATOM | 1242 | CG   | ARG | 80 | 36.625 | 49.423 | 27.117 | 0.00 | 0.00 |
| ATOM | 1243 | HG2  | ARG | 80 | 37.510 | 49.746 | 27.254 | 0.00 | 0.00 |
| ATOM | 1244 | HG3  | ARG | 80 | 36.055 | 49.994 | 27.594 | 0.00 | 0.00 |
| ATOM | 1245 | CD   | ARG | 80 | 36.573 | 48.168 | 27.752 | 0.00 | 0.00 |
| ATOM | 1246 | HD2  | ARG | 80 | 35.727 | 47.991 | 27.925 | 0.00 | 0.00 |
| ATOM | 1247 | HD3  | ARG | 80 | 36.828 | 47.607 | 27.132 | 0.00 | 0.00 |
| ATOM | 1248 | NE   | ARG | 80 | 37.307 | 47.939 | 28.912 | 0.00 | 0.00 |
| ATOM | 1249 | HE   | ARG | 80 | 38.124 | 48.400 | 28.945 | 0.00 | 0.00 |
| ATOM | 1250 | CZ   | ARG | 80 | 37.088 | 47.126 | 29.901 | 0.00 | 0.00 |
| ATOM | 1251 | NH1  | ARG | 80 | 37.934 | 46.943 | 30.786 | 0.00 | 0.00 |
| ATOM | 1252 | 1HH1 | ARG | 80 | 38.740 | 47.398 | 30.705 | 0.00 | 0.00 |
| ATOM | 1253 | 2HH1 | ARG | 80 | 37.784 | 46.306 | 31.522 | 0.00 | 0.00 |
| ATOM | 1254 | NH2  | ARG | 80 | 36.056 | 46.483 | 30.060 | 0.00 | 0.00 |
| ATOM | 1255 | 1HH2 | ARG | 80 | 35.310 | 46.674 | 29.483 | 0.00 | 0.00 |
| ATOM | 1256 | 2HH2 | ARG | 80 | 35.976 | 45.896 | 30.854 | 0.00 | 0.00 |
| ATOM | 1257 | C    | ARG | 80 | 33.799 | 49.831 | 25.843 | 0.00 | 0.00 |
| ATOM | 1258 | O    | ARG | 80 | 33.218 | 49.410 | 26.812 | 0.00 | 0.00 |
| ATOM | 1259 | N    | GLN | 81 | 33.471 | 50.966 | 25.258 | 0.00 | 0.00 |

|      |      |      |     |    |        |        |        |      |      |
|------|------|------|-----|----|--------|--------|--------|------|------|
| ATOM | 1260 | H    | GLN | 81 | 34.003 | 51.231 | 24.465 | 0.00 | 0.00 |
| ATOM | 1261 | CA   | GLN | 81 | 32.412 | 51.861 | 25.714 | 0.00 | 0.00 |
| ATOM | 1262 | HA   | GLN | 81 | 32.395 | 51.875 | 26.792 | 0.00 | 0.00 |
| ATOM | 1263 | CB   | GLN | 81 | 32.724 | 53.272 | 25.233 | 0.00 | 0.00 |
| ATOM | 1264 | HB2  | GLN | 81 | 32.909 | 53.255 | 24.181 | 0.00 | 0.00 |
| ATOM | 1265 | HB3  | GLN | 81 | 31.876 | 53.899 | 25.419 | 0.00 | 0.00 |
| ATOM | 1266 | CG   | GLN | 81 | 33.925 | 53.875 | 25.936 | 0.00 | 0.00 |
| ATOM | 1267 | HG2  | GLN | 81 | 33.677 | 54.053 | 26.943 | 0.00 | 0.00 |
| ATOM | 1268 | HG3  | GLN | 81 | 34.743 | 53.211 | 25.921 | 0.00 | 0.00 |
| ATOM | 1269 | CD   | GLN | 81 | 34.375 | 55.152 | 25.325 | 0.00 | 0.00 |
| ATOM | 1270 | OE1  | GLN | 81 | 33.990 | 56.027 | 25.287 | 0.00 | 0.00 |
| ATOM | 1271 | NE2  | GLN | 81 | 35.192 | 55.312 | 24.825 | 0.00 | 0.00 |
| ATOM | 1272 | 1HE2 | GLN | 81 | 35.479 | 56.141 | 24.412 | 0.00 | 0.00 |
| ATOM | 1273 | 2HE2 | GLN | 81 | 35.524 | 54.607 | 24.853 | 0.00 | 0.00 |
| ATOM | 1274 | C    | GLN | 81 | 31.022 | 51.424 | 25.256 | 0.00 | 0.00 |
| ATOM | 1275 | O    | GLN | 81 | 30.070 | 51.531 | 26.001 | 0.00 | 0.00 |
| ATOM | 1276 | N    | LEU | 82 | 30.900 | 50.867 | 24.064 | 0.00 | 0.00 |
| ATOM | 1277 | H    | LEU | 82 | 31.701 | 50.862 | 23.475 | 0.00 | 0.00 |
| ATOM | 1278 | CA   | LEU | 82 | 29.668 | 50.308 | 23.512 | 0.00 | 0.00 |
| ATOM | 1279 | HA   | LEU | 82 | 28.895 | 51.054 | 23.607 | 0.00 | 0.00 |
| ATOM | 1280 | CB   | LEU | 82 | 29.906 | 50.030 | 22.023 | 0.00 | 0.00 |
| ATOM | 1281 | HB2  | LEU | 82 | 30.332 | 50.905 | 21.577 | 0.00 | 0.00 |
| ATOM | 1282 | HB3  | LEU | 82 | 30.639 | 49.254 | 21.940 | 0.00 | 0.00 |
| ATOM | 1283 | CG   | LEU | 82 | 28.692 | 49.632 | 21.195 | 0.00 | 0.00 |
| ATOM | 1284 | HG   | LEU | 82 | 28.248 | 48.768 | 21.622 | 0.00 | 0.00 |
| ATOM | 1285 | CD1  | LEU | 82 | 27.659 | 50.711 | 21.126 | 0.00 | 0.00 |
| ATOM | 1286 | 1HD1 | LEU | 82 | 27.439 | 51.020 | 20.978 | 0.00 | 0.00 |
| ATOM | 1287 | 2HD1 | LEU | 82 | 27.306 | 50.872 | 21.122 | 0.00 | 0.00 |
| ATOM | 1288 | 3HD1 | LEU | 82 | 27.455 | 51.023 | 21.226 | 0.00 | 0.00 |
| ATOM | 1289 | CD2  | LEU | 82 | 29.123 | 49.303 | 19.791 | 0.00 | 0.00 |
| ATOM | 1290 | 1HD2 | LEU | 82 | 29.197 | 49.339 | 19.419 | 0.00 | 0.00 |
| ATOM | 1291 | 2HD2 | LEU | 82 | 29.136 | 49.133 | 19.459 | 0.00 | 0.00 |
| ATOM | 1292 | 3HD2 | LEU | 82 | 29.341 | 49.193 | 19.476 | 0.00 | 0.00 |
| ATOM | 1293 | C    | LEU | 82 | 29.199 | 49.067 | 24.282 | 0.00 | 0.00 |
| ATOM | 1294 | O    | LEU | 82 | 28.012 | 48.824 | 24.399 | 0.00 | 0.00 |
| ATOM | 1295 | N    | ALA | 83 | 30.114 | 48.313 | 24.878 | 0.00 | 0.00 |
| ATOM | 1296 | H    | ALA | 83 | 31.073 | 48.515 | 24.709 | 0.00 | 0.00 |
| ATOM | 1297 | CA   | ALA | 83 | 29.797 | 47.191 | 25.756 | 0.00 | 0.00 |
| ATOM | 1298 | HA   | ALA | 83 | 29.145 | 46.517 | 25.229 | 0.00 | 0.00 |
| ATOM | 1299 | CB   | ALA | 83 | 31.082 | 46.446 | 26.059 | 0.00 | 0.00 |
| ATOM | 1300 | HB1  | ALA | 83 | 31.595 | 46.371 | 25.552 | 0.00 | 0.00 |
| ATOM | 1301 | HB2  | ALA | 83 | 31.517 | 46.666 | 26.597 | 0.00 | 0.00 |
| ATOM | 1302 | HB3  | ALA | 83 | 31.052 | 45.745 | 26.259 | 0.00 | 0.00 |
| ATOM | 1303 | C    | ALA | 83 | 29.050 | 47.594 | 27.038 | 0.00 | 0.00 |
| ATOM | 1304 | O    | ALA | 83 | 28.353 | 46.775 | 27.603 | 0.00 | 0.00 |
| ATOM | 1305 | N    | ILE | 84 | 29.126 | 48.839 | 27.478 | 0.00 | 0.00 |
| ATOM | 1306 | H    | ILE | 84 | 29.707 | 49.467 | 26.980 | 0.00 | 0.00 |
| ATOM | 1307 | CA   | ILE | 84 | 28.440 | 49.330 | 28.680 | 0.00 | 0.00 |
| ATOM | 1308 | HA   | ILE | 84 | 28.498 | 48.567 | 29.440 | 0.00 | 0.00 |
| ATOM | 1309 | CB   | ILE | 84 | 29.135 | 50.583 | 29.232 | 0.00 | 0.00 |
| ATOM | 1310 | HB   | ILE | 84 | 29.057 | 51.353 | 28.502 | 0.00 | 0.00 |
| ATOM | 1311 | CG2  | ILE | 84 | 28.448 | 51.072 | 30.485 | 0.00 | 0.00 |
| ATOM | 1312 | 1HG2 | ILE | 84 | 28.119 | 51.069 | 30.726 | 0.00 | 0.00 |
| ATOM | 1313 | 2HG2 | ILE | 84 | 28.425 | 51.125 | 30.913 | 0.00 | 0.00 |
| ATOM | 1314 | 3HG2 | ILE | 84 | 28.288 | 51.402 | 30.737 | 0.00 | 0.00 |
| ATOM | 1315 | CG1  | ILE | 84 | 30.607 | 50.342 | 29.509 | 0.00 | 0.00 |
| ATOM | 1316 | 2HG1 | ILE | 84 | 30.706 | 49.657 | 30.276 | 0.00 | 0.00 |
| ATOM | 1317 | 3HG1 | ILE | 84 | 31.046 | 49.932 | 28.667 | 0.00 | 0.00 |
| ATOM | 1318 | CD1  | ILE | 84 | 31.416 | 51.541 | 29.857 | 0.00 | 0.00 |
| ATOM | 1319 | 1HD1 | ILE | 84 | 31.653 | 51.783 | 30.040 | 0.00 | 0.00 |
| ATOM | 1320 | 2HD1 | ILE | 84 | 31.684 | 51.806 | 29.850 | 0.00 | 0.00 |
| ATOM | 1321 | 3HD1 | ILE | 84 | 31.517 | 51.886 | 29.928 | 0.00 | 0.00 |
| ATOM | 1322 | C    | ILE | 84 | 26.950 | 49.549 | 28.407 | 0.00 | 0.00 |
| ATOM | 1323 | O    | ILE | 84 | 26.126 | 49.065 | 29.153 | 0.00 | 0.00 |
| ATOM | 1324 | N    | ILE | 85 | 26.576 | 50.194 | 27.309 | 0.00 | 0.00 |
| ATOM | 1325 | H    | ILE | 85 | 27.277 | 50.599 | 26.746 | 0.00 | 0.00 |
| ATOM | 1326 | CA   | ILE | 85 | 25.178 | 50.270 | 26.868 | 0.00 | 0.00 |
| ATOM | 1327 | HA   | ILE | 85 | 24.586 | 50.513 | 27.737 | 0.00 | 0.00 |
| ATOM | 1328 | CB   | ILE | 85 | 24.968 | 51.424 | 25.875 | 0.00 | 0.00 |
| ATOM | 1329 | HB   | ILE | 85 | 25.358 | 52.307 | 26.334 | 0.00 | 0.00 |
| ATOM | 1330 | CG2  | ILE | 85 | 25.726 | 51.249 | 24.575 | 0.00 | 0.00 |
| ATOM | 1331 | 1HG2 | ILE | 85 | 25.989 | 51.058 | 24.323 | 0.00 | 0.00 |
| ATOM | 1332 | 2HG2 | ILE | 85 | 26.017 | 51.377 | 24.275 | 0.00 | 0.00 |
| ATOM | 1333 | 3HG2 | ILE | 85 | 25.749 | 51.217 | 24.182 | 0.00 | 0.00 |
| ATOM | 1334 | CG1  | ILE | 85 | 23.496 | 51.690 | 25.594 | 0.00 | 0.00 |
| ATOM | 1335 | 2HG1 | ILE | 85 | 23.279 | 51.611 | 24.965 | 0.00 | 0.00 |
| ATOM | 1336 | 3HG1 | ILE | 85 | 23.010 | 51.311 | 25.900 | 0.00 | 0.00 |
| ATOM | 1337 | CD1  | ILE | 85 | 22.925 | 52.592 | 25.739 | 0.00 | 0.00 |
| ATOM | 1338 | 1HD1 | ILE | 85 | 22.528 | 52.796 | 25.450 | 0.00 | 0.00 |
| ATOM | 1339 | 2HD1 | ILE | 85 | 22.672 | 52.577 | 26.010 | 0.00 | 0.00 |
| ATOM | 1340 | 3HD1 | ILE | 85 | 23.144 | 53.063 | 25.856 | 0.00 | 0.00 |
| ATOM | 1341 | C    | ILE | 85 | 24.663 | 48.917 | 26.375 | 0.00 | 0.00 |
| ATOM | 1342 | O    | ILE | 85 | 23.513 | 48.579 | 26.586 | 0.00 | 0.00 |
| ATOM | 1343 | N    | GLY | 86 | 25.544 | 48.077 | 25.847 | 0.00 | 0.00 |
| ATOM | 1344 | H    | GLY | 86 | 26.457 | 48.424 | 25.668 | 0.00 | 0.00 |
| ATOM | 1345 | CA   | GLY | 86 | 25.294 | 46.675 | 25.557 | 0.00 | 0.00 |
| ATOM | 1346 | HA2  | GLY | 86 | 24.436 | 46.599 | 24.926 | 0.00 | 0.00 |
| ATOM | 1347 | HA3  | GLY | 86 | 26.139 | 46.293 | 25.039 | 0.00 | 0.00 |
| ATOM | 1348 | C    | GLY | 86 | 25.045 | 45.790 | 26.763 | 0.00 | 0.00 |
| ATOM | 1349 | O    | GLY | 86 | 24.724 | 44.656 | 26.586 | 0.00 | 0.00 |
| ATOM | 1350 | N    | ASP | 87 | 25.170 | 46.290 | 27.971 | 0.00 | 0.00 |
| ATOM | 1351 | H    | ASP | 87 | 25.523 | 47.197 | 28.037 | 0.00 | 0.00 |
| ATOM | 1352 | CA   | ASP | 87 | 24.768 | 45.657 | 29.218 | 0.00 | 0.00 |
| ATOM | 1353 | HA   | ASP | 87 | 24.583 | 44.621 | 29.036 | 0.00 | 0.00 |
| ATOM | 1354 | CB   | ASP | 87 | 25.905 | 45.746 | 30.197 | 0.00 | 0.00 |
| ATOM | 1355 | HB2  | ASP | 87 | 26.764 | 45.325 | 29.748 | 0.00 | 0.00 |
| ATOM | 1356 | HB3  | ASP | 87 | 26.122 | 46.760 | 30.395 | 0.00 | 0.00 |
| ATOM | 1357 | CG   | ASP | 87 | 25.646 | 45.043 | 31.498 | 0.00 | 0.00 |
| ATOM | 1358 | OD1  | ASP | 87 | 25.554 | 45.163 | 32.266 | 0.00 | 0.00 |
| ATOM | 1359 | OD2  | ASP | 87 | 25.586 | 44.371 | 31.769 | 0.00 | 0.00 |
| ATOM | 1360 | C    | ASP | 87 | 23.483 | 46.225 | 29.801 | 0.00 | 0.00 |
| ATOM | 1361 | O    | ASP | 87 | 22.823 | 45.581 | 30.581 | 0.00 | 0.00 |
| ATOM | 1362 | N    | ASP | 88 | 23.054 | 47.397 | 29.393 | 0.00 | 0.00 |
| ATOM | 1363 | H    | ASP | 88 | 23.601 | 47.898 | 28.743 | 0.00 | 0.00 |
| ATOM | 1364 | CA   | ASP | 88 | 21.783 | 47.971 | 29.826 | 0.00 | 0.00 |

|      |      |      |     |    |        |        |        |      |      |
|------|------|------|-----|----|--------|--------|--------|------|------|
| ATOM | 1365 | HA   | ASP | 88 | 21.732 | 47.881 | 30.894 | 0.00 | 0.00 |
| ATOM | 1366 | CB   | ASP | 88 | 21.752 | 49.452 | 29.483 | 0.00 | 0.00 |
| ATOM | 1367 | HB2  | ASP | 88 | 22.704 | 49.875 | 29.686 | 0.00 | 0.00 |
| ATOM | 1368 | HB3  | ASP | 88 | 21.541 | 49.568 | 28.449 | 0.00 | 0.00 |
| ATOM | 1369 | CG   | ASP | 88 | 20.741 | 50.222 | 30.284 | 0.00 | 0.00 |
| ATOM | 1370 | OD1  | ASP | 88 | 20.545 | 50.646 | 30.695 | 0.00 | 0.00 |
| ATOM | 1371 | OD2  | ASP | 88 | 20.171 | 50.446 | 30.534 | 0.00 | 0.00 |
| ATOM | 1372 | C    | ASP | 88 | 20.578 | 47.209 | 29.263 | 0.00 | 0.00 |
| ATOM | 1373 | O    | ASP | 88 | 19.560 | 47.108 | 29.890 | 0.00 | 0.00 |
| ATOM | 1374 | N    | ILE | 89 | 20.736 | 46.584 | 28.121 | 0.00 | 0.00 |
| ATOM | 1375 | H    | ILE | 89 | 21.582 | 46.764 | 27.651 | 0.00 | 0.00 |
| ATOM | 1376 | CA   | ILE | 89 | 19.783 | 45.651 | 27.511 | 0.00 | 0.00 |
| ATOM | 1377 | HA   | ILE | 89 | 18.797 | 46.044 | 27.666 | 0.00 | 0.00 |
| ATOM | 1378 | CB   | ILE | 89 | 20.007 | 45.556 | 26.006 | 0.00 | 0.00 |
| ATOM | 1379 | HB   | ILE | 89 | 19.323 | 44.831 | 25.626 | 0.00 | 0.00 |
| ATOM | 1380 | CG2  | ILE | 89 | 19.669 | 46.851 | 25.327 | 0.00 | 0.00 |
| ATOM | 1381 | 1HG2 | ILE | 89 | 19.536 | 46.871 | 24.664 | 0.00 | 0.00 |
| ATOM | 1382 | 2HG2 | ILE | 89 | 19.118 | 47.217 | 25.500 | 0.00 | 0.00 |
| ATOM | 1383 | 3HG2 | ILE | 89 | 20.076 | 47.414 | 25.322 | 0.00 | 0.00 |
| ATOM | 1384 | CG1  | ILE | 89 | 21.398 | 45.106 | 25.648 | 0.00 | 0.00 |
| ATOM | 1385 | 2HG1 | ILE | 89 | 21.935 | 45.615 | 25.856 | 0.00 | 0.00 |
| ATOM | 1386 | 3HG1 | ILE | 89 | 21.600 | 44.462 | 26.008 | 0.00 | 0.00 |
| ATOM | 1387 | CD1  | ILE | 89 | 21.843 | 44.802 | 24.528 | 0.00 | 0.00 |
| ATOM | 1388 | 1HD1 | ILE | 89 | 21.930 | 44.944 | 24.237 | 0.00 | 0.00 |
| ATOM | 1389 | 2HD1 | ILE | 89 | 22.211 | 44.588 | 24.259 | 0.00 | 0.00 |
| ATOM | 1390 | 3HD1 | ILE | 89 | 21.739 | 44.636 | 24.290 | 0.00 | 0.00 |
| ATOM | 1391 | C    | ILE | 89 | 19.764 | 44.261 | 28.145 | 0.00 | 0.00 |
| ATOM | 1392 | O    | ILE | 89 | 18.950 | 43.438 | 27.780 | 0.00 | 0.00 |
| ATOM | 1393 | N    | ASN | 90 | 20.632 | 43.975 | 29.114 | 0.00 | 0.00 |
| ATOM | 1394 | H    | ASN | 90 | 21.277 | 44.678 | 29.386 | 0.00 | 0.00 |
| ATOM | 1395 | CA   | ASN | 90 | 20.682 | 42.707 | 29.829 | 0.00 | 0.00 |
| ATOM | 1396 | HA   | ASN | 90 | 20.671 | 41.922 | 29.106 | 0.00 | 0.00 |
| ATOM | 1397 | CB   | ASN | 90 | 21.997 | 42.627 | 30.585 | 0.00 | 0.00 |
| ATOM | 1398 | HB2  | ASN | 90 | 22.779 | 42.927 | 29.939 | 0.00 | 0.00 |
| ATOM | 1399 | HB3  | ASN | 90 | 21.988 | 43.288 | 31.414 | 0.00 | 0.00 |
| ATOM | 1400 | CG   | ASN | 90 | 22.345 | 41.284 | 31.098 | 0.00 | 0.00 |
| ATOM | 1401 | OD1  | ASN | 90 | 21.812 | 40.387 | 30.962 | 0.00 | 0.00 |
| ATOM | 1402 | ND2  | ASN | 90 | 23.274 | 41.116 | 31.688 | 0.00 | 0.00 |
| ATOM | 1403 | 1HD2 | ASN | 90 | 23.531 | 40.246 | 32.024 | 0.00 | 0.00 |
| ATOM | 1404 | 2HD2 | ASN | 90 | 23.721 | 41.855 | 31.786 | 0.00 | 0.00 |
| ATOM | 1405 | C    | ASN | 90 | 19.471 | 42.490 | 30.722 | 0.00 | 0.00 |
| ATOM | 1406 | O    | ASN | 90 | 19.127 | 41.423 | 30.990 | 0.00 | 0.00 |
| ATOM | 1407 | N    | ARG | 91 | 18.785 | 43.504 | 31.132 | 0.00 | 0.00 |
| ATOM | 1408 | H    | ARG | 91 | 19.128 | 44.335 | 30.852 | 0.00 | 0.00 |
| ATOM | 1409 | CA   | ARG | 91 | 17.461 | 43.464 | 31.733 | 0.00 | 0.00 |
| ATOM | 1410 | HA   | ARG | 91 | 17.329 | 42.527 | 32.222 | 0.00 | 0.00 |
| ATOM | 1411 | CB   | ARG | 91 | 17.322 | 44.556 | 32.762 | 0.00 | 0.00 |
| ATOM | 1412 | HB2  | ARG | 91 | 17.442 | 45.483 | 32.300 | 0.00 | 0.00 |
| ATOM | 1413 | HB3  | ARG | 91 | 16.343 | 44.527 | 33.152 | 0.00 | 0.00 |
| ATOM | 1414 | CG   | ARG | 91 | 18.301 | 44.449 | 33.877 | 0.00 | 0.00 |
| ATOM | 1415 | HG2  | ARG | 91 | 18.179 | 43.522 | 34.313 | 0.00 | 0.00 |
| ATOM | 1416 | HG3  | ARG | 91 | 19.265 | 44.504 | 33.499 | 0.00 | 0.00 |
| ATOM | 1417 | CD   | ARG | 91 | 18.133 | 45.492 | 34.935 | 0.00 | 0.00 |
| ATOM | 1418 | HD2  | ARG | 91 | 17.251 | 45.426 | 35.347 | 0.00 | 0.00 |
| ATOM | 1419 | HD3  | ARG | 91 | 18.778 | 45.359 | 35.659 | 0.00 | 0.00 |
| ATOM | 1420 | NE   | ARG | 91 | 18.274 | 46.730 | 34.501 | 0.00 | 0.00 |
| ATOM | 1421 | HE   | ARG | 91 | 17.953 | 47.059 | 34.142 | 0.00 | 0.00 |
| ATOM | 1422 | CZ   | ARG | 91 | 18.769 | 47.447 | 34.516 | 0.00 | 0.00 |
| ATOM | 1423 | NH1  | ARG | 91 | 19.241 | 47.171 | 34.968 | 0.00 | 0.00 |
| ATOM | 1424 | 1HH1 | ARG | 91 | 19.249 | 46.399 | 35.337 | 0.00 | 0.00 |
| ATOM | 1425 | 2HH1 | ARG | 91 | 19.593 | 47.752 | 34.941 | 0.00 | 0.00 |
| ATOM | 1426 | NH2  | ARG | 91 | 18.805 | 48.477 | 34.056 | 0.00 | 0.00 |
| ATOM | 1427 | 1HH2 | ARG | 91 | 18.458 | 48.737 | 33.684 | 0.00 | 0.00 |
| ATOM | 1428 | 2HH2 | ARG | 91 | 19.185 | 48.977 | 34.027 | 0.00 | 0.00 |
| ATOM | 1429 | C    | ARG | 91 | 16.387 | 43.575 | 30.666 | 0.00 | 0.00 |
| ATOM | 1430 | O    | ARG | 91 | 16.521 | 44.375 | 29.761 | 0.00 | 0.00 |
| ATOM | 1431 | N    | ARG | 92 | 15.320 | 42.801 | 30.783 | 0.00 | 0.00 |
| ATOM | 1432 | H    | ARG | 92 | 15.305 | 42.224 | 31.582 | 0.00 | 0.00 |
| ATOM | 1433 | CA   | ARG | 92 | 14.218 | 42.617 | 29.832 | 0.00 | 0.00 |
| ATOM | 1434 | HA   | ARG | 92 | 13.590 | 41.847 | 30.244 | 0.00 | 0.00 |
| ATOM | 1435 | CB   | ARG | 92 | 13.355 | 43.877 | 29.762 | 0.00 | 0.00 |
| ATOM | 1436 | HB2  | ARG | 92 | 13.024 | 44.123 | 30.739 | 0.00 | 0.00 |
| ATOM | 1437 | HB3  | ARG | 92 | 13.935 | 44.690 | 29.394 | 0.00 | 0.00 |
| ATOM | 1438 | CG   | ARG | 92 | 12.139 | 43.731 | 28.874 | 0.00 | 0.00 |
| ATOM | 1439 | HG2  | ARG | 92 | 12.433 | 43.482 | 27.924 | 0.00 | 0.00 |
| ATOM | 1440 | HG3  | ARG | 92 | 11.532 | 42.982 | 29.239 | 0.00 | 0.00 |
| ATOM | 1441 | CD   | ARG | 92 | 11.331 | 44.964 | 28.759 | 0.00 | 0.00 |
| ATOM | 1442 | HD2  | ARG | 92 | 10.919 | 45.164 | 29.681 | 0.00 | 0.00 |
| ATOM | 1443 | HD3  | ARG | 92 | 11.962 | 45.743 | 28.515 | 0.00 | 0.00 |
| ATOM | 1444 | NE   | ARG | 92 | 10.289 | 44.838 | 27.762 | 0.00 | 0.00 |
| ATOM | 1445 | HE   | ARG | 92 | 10.006 | 43.954 | 27.543 | 0.00 | 0.00 |
| ATOM | 1446 | CZ   | ARG | 92 | 9.703  | 45.755 | 27.077 | 0.00 | 0.00 |
| ATOM | 1447 | NH1  | ARG | 92 | 9.901  | 46.961 | 27.242 | 0.00 | 0.00 |
| ATOM | 1448 | 1HH1 | ARG | 92 | 10.501 | 47.246 | 27.936 | 0.00 | 0.00 |
| ATOM | 1449 | 2HH1 | ARG | 92 | 9.409  | 47.587 | 26.676 | 0.00 | 0.00 |
| ATOM | 1450 | NH2  | ARG | 92 | 8.870  | 45.483 | 26.172 | 0.00 | 0.00 |
| ATOM | 1451 | 1HH2 | ARG | 92 | 8.669  | 44.573 | 25.994 | 0.00 | 0.00 |
| ATOM | 1452 | 2HH2 | ARG | 92 | 8.450  | 46.208 | 25.663 | 0.00 | 0.00 |
| ATOM | 1453 | C    | ARG | 92 | 14.605 | 42.089 | 28.457 | 0.00 | 0.00 |
| ATOM | 1454 | O    | ARG | 92 | 14.080 | 41.091 | 28.049 | 0.00 | 0.00 |
| ATOM | 1455 | N    | TYR | 93 | 15.449 | 42.760 | 27.718 | 0.00 | 0.00 |
| ATOM | 1456 | H    | TYR | 93 | 15.876 | 43.542 | 28.132 | 0.00 | 0.00 |
| ATOM | 1457 | CA   | TYR | 93 | 15.578 | 42.587 | 26.277 | 0.00 | 0.00 |
| ATOM | 1458 | HA   | TYR | 93 | 14.594 | 42.409 | 25.871 | 0.00 | 0.00 |
| ATOM | 1459 | CB   | TYR | 93 | 16.092 | 43.875 | 25.650 | 0.00 | 0.00 |
| ATOM | 1460 | HB2  | TYR | 93 | 17.105 | 44.030 | 25.970 | 0.00 | 0.00 |
| ATOM | 1461 | HB3  | TYR | 93 | 16.110 | 43.754 | 24.583 | 0.00 | 0.00 |
| ATOM | 1462 | CG   | TYR | 93 | 15.256 | 45.094 | 25.983 | 0.00 | 0.00 |
| ATOM | 1463 | CD1  | TYR | 93 | 14.067 | 45.330 | 25.331 | 0.00 | 0.00 |
| ATOM | 1464 | HD1  | TYR | 93 | 13.766 | 44.664 | 24.586 | 0.00 | 0.00 |
| ATOM | 1465 | CE1  | TYR | 93 | 13.272 | 46.434 | 25.643 | 0.00 | 0.00 |
| ATOM | 1466 | HE1  | TYR | 93 | 12.371 | 46.629 | 25.136 | 0.00 | 0.00 |
| ATOM | 1467 | CZ   | TYR | 93 | 13.659 | 47.310 | 26.626 | 0.00 | 0.00 |
| ATOM | 1468 | OH   | TYR | 93 | 12.879 | 48.355 | 26.940 | 0.00 | 0.00 |
| ATOM | 1469 | HH   | TYR | 93 | 13.202 | 48.837 | 27.647 | 0.00 | 0.00 |

|      |      |      |     |     |        |        |        |      |      |
|------|------|------|-----|-----|--------|--------|--------|------|------|
| ATOM | 1470 | CE2  | TYR | 93  | 14.852 | 47.076 | 27.284 | 0.00 | 0.00 |
| ATOM | 1471 | HE2  | TYR | 93  | 15.158 | 47.742 | 28.035 | 0.00 | 0.00 |
| ATOM | 1472 | CD2  | TYR | 93  | 15.650 | 45.978 | 26.958 | 0.00 | 0.00 |
| ATOM | 1473 | HD2  | TYR | 93  | 16.559 | 45.810 | 27.464 | 0.00 | 0.00 |
| ATOM | 1474 | C    | TYR | 93  | 16.408 | 41.363 | 25.884 | 0.00 | 0.00 |
| ATOM | 1475 | O    | TYR | 93  | 15.999 | 40.608 | 25.022 | 0.00 | 0.00 |
| ATOM | 1476 | N    | ASP | 94  | 17.507 | 41.095 | 26.570 | 0.00 | 0.00 |
| ATOM | 1477 | H    | ASP | 94  | 17.820 | 41.764 | 27.239 | 0.00 | 0.00 |
| ATOM | 1478 | CA   | ASP | 94  | 18.306 | 39.886 | 26.364 | 0.00 | 0.00 |
| ATOM | 1479 | HA   | ASP | 94  | 18.527 | 39.809 | 25.313 | 0.00 | 0.00 |
| ATOM | 1480 | CB   | ASP | 94  | 19.632 | 40.021 | 27.089 | 0.00 | 0.00 |
| ATOM | 1481 | HB2  | ASP | 94  | 20.147 | 40.880 | 26.710 | 0.00 | 0.00 |
| ATOM | 1482 | HB3  | ASP | 94  | 19.441 | 40.179 | 28.132 | 0.00 | 0.00 |
| ATOM | 1483 | CG   | ASP | 94  | 20.518 | 38.806 | 26.921 | 0.00 | 0.00 |
| ATOM | 1484 | OD1  | ASP | 94  | 21.124 | 38.610 | 25.884 | 0.00 | 0.00 |
| ATOM | 1485 | OD2  | ASP | 94  | 20.659 | 38.064 | 27.850 | 0.00 | 0.00 |
| ATOM | 1486 | C    | ASP | 94  | 17.561 | 38.605 | 26.742 | 0.00 | 0.00 |
| ATOM | 1487 | O    | ASP | 94  | 17.763 | 37.584 | 26.119 | 0.00 | 0.00 |
| ATOM | 1488 | N    | SER | 95  | 16.635 | 38.657 | 27.687 | 0.00 | 0.00 |
| ATOM | 1489 | H    | SER | 95  | 16.527 | 39.502 | 28.187 | 0.00 | 0.00 |
| ATOM | 1490 | CA   | SER | 95  | 15.731 | 37.548 | 27.996 | 0.00 | 0.00 |
| ATOM | 1491 | HA   | SER | 95  | 16.318 | 36.664 | 28.163 | 0.00 | 0.00 |
| ATOM | 1492 | CB   | SER | 95  | 14.941 | 37.821 | 29.258 | 0.00 | 0.00 |
| ATOM | 1493 | HB2  | SER | 95  | 14.351 | 38.615 | 29.142 | 0.00 | 0.00 |
| ATOM | 1494 | HB3  | SER | 95  | 14.338 | 37.047 | 29.485 | 0.00 | 0.00 |
| ATOM | 1495 | DG   | SER | 95  | 15.706 | 38.034 | 30.285 | 0.00 | 0.00 |
| ATOM | 1496 | HG   | SER | 95  | 15.882 | 38.044 | 30.572 | 0.00 | 0.00 |
| ATOM | 1497 | C    | SER | 95  | 14.777 | 37.230 | 26.854 | 0.00 | 0.00 |
| ATOM | 1498 | O    | SER | 95  | 14.385 | 36.110 | 26.701 | 0.00 | 0.00 |
| ATOM | 1499 | N    | GLU | 96  | 14.448 | 38.179 | 26.006 | 0.00 | 0.00 |
| ATOM | 1500 | H    | GLU | 96  | 14.813 | 39.078 | 26.173 | 0.00 | 0.00 |
| ATOM | 1501 | CA   | GLU | 96  | 13.681 | 37.969 | 24.785 | 0.00 | 0.00 |
| ATOM | 1502 | HA   | GLU | 96  | 12.947 | 37.210 | 24.987 | 0.00 | 0.00 |
| ATOM | 1503 | CB   | GLU | 96  | 12.957 | 39.256 | 24.399 | 0.00 | 0.00 |
| ATOM | 1504 | HB2  | GLU | 96  | 12.889 | 39.893 | 25.231 | 0.00 | 0.00 |
| ATOM | 1505 | HB3  | GLU | 96  | 13.509 | 39.761 | 23.659 | 0.00 | 0.00 |
| ATOM | 1506 | CG   | GLU | 96  | 11.575 | 39.040 | 23.865 | 0.00 | 0.00 |
| ATOM | 1507 | HG2  | GLU | 96  | 11.238 | 39.942 | 23.410 | 0.00 | 0.00 |
| ATOM | 1508 | HG3  | GLU | 96  | 11.606 | 38.299 | 23.116 | 0.00 | 0.00 |
| ATOM | 1509 | CD   | GLU | 96  | 10.625 | 38.644 | 24.940 | 0.00 | 0.00 |
| ATOM | 1510 | OE1  | GLU | 96  | 10.227 | 38.401 | 25.351 | 0.00 | 0.00 |
| ATOM | 1511 | OE2  | GLU | 96  | 10.279 | 38.587 | 25.407 | 0.00 | 0.00 |
| ATOM | 1512 | C    | GLU | 96  | 14.553 | 37.444 | 23.642 | 0.00 | 0.00 |
| ATOM | 1513 | O    | GLU | 96  | 14.140 | 36.538 | 22.938 | 0.00 | 0.00 |
| ATOM | 1514 | N    | PHE | 97  | 15.794 | 37.913 | 23.498 | 0.00 | 0.00 |
| ATOM | 1515 | H    | PHE | 97  | 16.078 | 38.679 | 24.066 | 0.00 | 0.00 |
| ATOM | 1516 | CA   | PHE | 97  | 16.765 | 37.352 | 22.555 | 0.00 | 0.00 |
| ATOM | 1517 | HA   | PHE | 97  | 16.335 | 37.369 | 21.564 | 0.00 | 0.00 |
| ATOM | 1518 | CB   | PHE | 97  | 18.046 | 38.194 | 22.534 | 0.00 | 0.00 |
| ATOM | 1519 | HB2  | PHE | 97  | 18.532 | 38.079 | 23.486 | 0.00 | 0.00 |
| ATOM | 1520 | HB3  | PHE | 97  | 18.712 | 37.769 | 21.804 | 0.00 | 0.00 |
| ATOM | 1521 | CG   | PHE | 97  | 17.927 | 39.667 | 22.223 | 0.00 | 0.00 |
| ATOM | 1522 | CD1  | PHE | 97  | 16.949 | 40.163 | 21.377 | 0.00 | 0.00 |
| ATOM | 1523 | HD1  | PHE | 97  | 16.276 | 39.497 | 20.911 | 0.00 | 0.00 |
| ATOM | 1524 | CE1  | PHE | 97  | 16.854 | 41.526 | 21.128 | 0.00 | 0.00 |
| ATOM | 1525 | HE1  | PHE | 97  | 16.115 | 41.893 | 20.471 | 0.00 | 0.00 |
| ATOM | 1526 | CZ   | PHE | 97  | 17.723 | 42.411 | 21.733 | 0.00 | 0.00 |
| ATOM | 1527 | HZ   | PHE | 97  | 17.628 | 43.458 | 21.559 | 0.00 | 0.00 |
| ATOM | 1528 | CE2  | PHE | 97  | 18.709 | 41.927 | 22.568 | 0.00 | 0.00 |
| ATOM | 1529 | HE2  | PHE | 97  | 19.370 | 42.604 | 23.034 | 0.00 | 0.00 |
| ATOM | 1530 | CD2  | PHE | 97  | 18.822 | 40.561 | 22.795 | 0.00 | 0.00 |
| ATOM | 1531 | HD2  | PHE | 97  | 19.595 | 40.198 | 23.420 | 0.00 | 0.00 |
| ATOM | 1532 | C    | PHE | 97  | 17.097 | 35.883 | 22.864 | 0.00 | 0.00 |
| ATOM | 1533 | O    | PHE | 97  | 17.339 | 35.112 | 21.960 | 0.00 | 0.00 |
| ATOM | 1534 | N    | GLN | 98  | 17.055 | 35.466 | 24.124 | 0.00 | 0.00 |
| ATOM | 1535 | H    | GLN | 98  | 16.933 | 36.154 | 24.828 | 0.00 | 0.00 |
| ATOM | 1536 | CA   | GLN | 98  | 17.147 | 34.060 | 24.522 | 0.00 | 0.00 |
| ATOM | 1537 | HA   | GLN | 98  | 18.005 | 33.613 | 24.043 | 0.00 | 0.00 |
| ATOM | 1538 | CB   | GLN | 98  | 17.340 | 33.961 | 26.032 | 0.00 | 0.00 |
| ATOM | 1539 | HB2  | GLN | 98  | 16.613 | 34.575 | 26.523 | 0.00 | 0.00 |
| ATOM | 1540 | HB3  | GLN | 98  | 17.178 | 32.945 | 26.337 | 0.00 | 0.00 |
| ATOM | 1541 | CG   | GLN | 98  | 18.723 | 34.378 | 26.489 | 0.00 | 0.00 |
| ATOM | 1542 | HG2  | GLN | 98  | 19.427 | 33.655 | 26.150 | 0.00 | 0.00 |
| ATOM | 1543 | HG3  | GLN | 98  | 18.988 | 35.324 | 26.063 | 0.00 | 0.00 |
| ATOM | 1544 | CD   | GLN | 98  | 18.832 | 34.465 | 27.984 | 0.00 | 0.00 |
| ATOM | 1545 | OE1  | GLN | 98  | 18.630 | 33.567 | 28.668 | 0.00 | 0.00 |
| ATOM | 1546 | NE2  | GLN | 98  | 19.142 | 35.533 | 28.547 | 0.00 | 0.00 |
| ATOM | 1547 | 1HE2 | GLN | 98  | 19.194 | 35.583 | 29.516 | 0.00 | 0.00 |
| ATOM | 1548 | 2HE2 | GLN | 98  | 19.321 | 36.302 | 28.004 | 0.00 | 0.00 |
| ATOM | 1549 | C    | GLN | 98  | 15.927 | 33.252 | 24.064 | 0.00 | 0.00 |
| ATOM | 1550 | O    | GLN | 98  | 16.087 | 32.160 | 23.547 | 0.00 | 0.00 |
| ATOM | 1551 | N    | THR | 99  | 14.721 | 33.800 | 24.159 | 0.00 | 0.00 |
| ATOM | 1552 | H    | THR | 99  | 14.645 | 34.683 | 24.601 | 0.00 | 0.00 |
| ATOM | 1553 | CA   | THR | 99  | 13.485 | 33.173 | 23.670 | 0.00 | 0.00 |
| ATOM | 1554 | HA   | THR | 99  | 13.409 | 32.192 | 24.111 | 0.00 | 0.00 |
| ATOM | 1555 | CB   | THR | 99  | 12.252 | 33.970 | 24.089 | 0.00 | 0.00 |
| ATOM | 1556 | HB   | THR | 99  | 12.230 | 34.897 | 23.572 | 0.00 | 0.00 |
| ATOM | 1557 | CG2  | THR | 99  | 10.947 | 33.258 | 23.842 | 0.00 | 0.00 |
| ATOM | 1558 | 1HG2 | THR | 99  | 10.599 | 33.123 | 23.843 | 0.00 | 0.00 |
| ATOM | 1559 | 2HG2 | THR | 99  | 10.636 | 33.130 | 23.715 | 0.00 | 0.00 |
| ATOM | 1560 | 3HG2 | THR | 99  | 10.647 | 33.012 | 23.780 | 0.00 | 0.00 |
| ATOM | 1561 | OG1  | THR | 99  | 12.282 | 34.234 | 25.438 | 0.00 | 0.00 |
| ATOM | 1562 | HG1  | THR | 99  | 11.982 | 34.780 | 25.596 | 0.00 | 0.00 |
| ATOM | 1563 | C    | THR | 99  | 13.493 | 32.988 | 22.153 | 0.00 | 0.00 |
| ATOM | 1564 | O    | THR | 99  | 12.991 | 31.999 | 21.655 | 0.00 | 0.00 |
| ATOM | 1565 | N    | MET | 100 | 14.127 | 33.880 | 21.410 | 0.00 | 0.00 |
| ATOM | 1566 | H    | MET | 100 | 14.487 | 34.684 | 21.872 | 0.00 | 0.00 |
| ATOM | 1567 | CA   | MET | 100 | 14.286 | 33.779 | 19.957 | 0.00 | 0.00 |
| ATOM | 1568 | HA   | MET | 100 | 13.322 | 33.562 | 19.524 | 0.00 | 0.00 |
| ATOM | 1569 | CB   | MET | 100 | 14.757 | 35.119 | 19.390 | 0.00 | 0.00 |
| ATOM | 1570 | HB2  | MET | 100 | 15.655 | 35.415 | 19.886 | 0.00 | 0.00 |
| ATOM | 1571 | HB3  | MET | 100 | 14.975 | 35.015 | 18.350 | 0.00 | 0.00 |
| ATOM | 1572 | CG   | MET | 100 | 13.727 | 36.212 | 19.545 | 0.00 | 0.00 |
| ATOM | 1573 | HG2  | MET | 100 | 12.917 | 35.996 | 18.907 | 0.00 | 0.00 |
| ATOM | 1574 | HG3  | MET | 100 | 13.375 | 36.209 | 20.544 | 0.00 | 0.00 |



|      |      |      |     |     |        |        |        |      |      |
|------|------|------|-----|-----|--------|--------|--------|------|------|
| ATOM | 1575 | SD   | MET | 100 | 14.288 | 37.860 | 19.183 | 0.00 | 0.00 |
| ATOM | 1576 | CE   | MET | 100 | 13.098 | 38.811 | 20.045 | 0.00 | 0.00 |
| ATOM | 1577 | HE1  | MET | 100 | 12.866 | 39.008 | 20.224 | 0.00 | 0.00 |
| ATOM | 1578 | HE2  | MET | 100 | 12.863 | 39.009 | 20.214 | 0.00 | 0.00 |
| ATOM | 1579 | HE3  | MET | 100 | 12.844 | 39.007 | 20.216 | 0.00 | 0.00 |
| ATOM | 1580 | C    | MET | 100 | 15.223 | 32.648 | 19.518 | 0.00 | 0.00 |
| ATOM | 1581 | O    | MET | 100 | 15.130 | 32.208 | 18.410 | 0.00 | 0.00 |
| ATOM | 1582 | N    | LEU | 101 | 16.103 | 32.158 | 20.365 | 0.00 | 0.00 |
| ATOM | 1583 | H    | LEU | 101 | 16.132 | 32.574 | 21.252 | 0.00 | 0.00 |
| ATOM | 1584 | CA   | LEU | 101 | 17.118 | 31.159 | 20.030 | 0.00 | 0.00 |
| ATOM | 1585 | HA   | LEU | 101 | 17.043 | 30.922 | 18.980 | 0.00 | 0.00 |
| ATOM | 1586 | CB   | LEU | 101 | 18.503 | 31.755 | 20.261 | 0.00 | 0.00 |
| ATOM | 1587 | HB2  | LEU | 101 | 18.583 | 31.982 | 21.301 | 0.00 | 0.00 |
| ATOM | 1588 | HB3  | LEU | 101 | 19.232 | 31.003 | 20.034 | 0.00 | 0.00 |
| ATOM | 1589 | CG   | LEU | 101 | 18.858 | 33.010 | 19.469 | 0.00 | 0.00 |
| ATOM | 1590 | HG   | LEU | 101 | 18.152 | 33.772 | 19.681 | 0.00 | 0.00 |
| ATOM | 1591 | CD1  | LEU | 101 | 20.201 | 33.503 | 19.890 | 0.00 | 0.00 |
| ATOM | 1592 | 1HD1 | LEU | 101 | 20.501 | 34.117 | 19.599 | 0.00 | 0.00 |
| ATOM | 1593 | 2HD1 | LEU | 101 | 20.786 | 33.080 | 19.822 | 0.00 | 0.00 |
| ATOM | 1594 | 3HD1 | LEU | 101 | 20.279 | 33.682 | 20.566 | 0.00 | 0.00 |
| ATOM | 1595 | CD2  | LEU | 101 | 18.903 | 32.799 | 17.995 | 0.00 | 0.00 |
| ATOM | 1596 | 1HD2 | LEU | 101 | 18.124 | 32.656 | 17.619 | 0.00 | 0.00 |
| ATOM | 1597 | 2HD2 | LEU | 101 | 19.217 | 33.483 | 17.548 | 0.00 | 0.00 |
| ATOM | 1598 | 3HD2 | LEU | 101 | 19.382 | 32.126 | 17.746 | 0.00 | 0.00 |
| ATOM | 1599 | C    | LEU | 101 | 16.955 | 29.807 | 20.740 | 0.00 | 0.00 |
| ATOM | 1600 | O    | LEU | 101 | 17.690 | 28.891 | 20.473 | 0.00 | 0.00 |
| ATOM | 1601 | N    | GLN | 102 | 16.002 | 29.651 | 21.617 | 0.00 | 0.00 |
| ATOM | 1602 | H    | GLN | 102 | 15.436 | 30.428 | 21.796 | 0.00 | 0.00 |
| ATOM | 1603 | CA   | GLN | 102 | 15.874 | 28.471 | 22.464 | 0.00 | 0.00 |
| ATOM | 1604 | HA   | GLN | 102 | 16.855 | 28.253 | 22.835 | 0.00 | 0.00 |
| ATOM | 1605 | CB   | GLN | 102 | 15.013 | 28.784 | 23.677 | 0.00 | 0.00 |
| ATOM | 1606 | HB2  | GLN | 102 | 15.116 | 27.989 | 24.372 | 0.00 | 0.00 |
| ATOM | 1607 | HB3  | GLN | 102 | 15.382 | 29.664 | 24.139 | 0.00 | 0.00 |
| ATOM | 1608 | CG   | GLN | 102 | 13.545 | 28.956 | 23.402 | 0.00 | 0.00 |
| ATOM | 1609 | HG2  | GLN | 102 | 13.421 | 29.688 | 22.669 | 0.00 | 0.00 |
| ATOM | 1610 | HG3  | GLN | 102 | 13.153 | 28.062 | 23.036 | 0.00 | 0.00 |
| ATOM | 1611 | CD   | GLN | 102 | 12.731 | 29.335 | 24.590 | 0.00 | 0.00 |
| ATOM | 1612 | OE1  | GLN | 102 | 13.131 | 29.715 | 25.561 | 0.00 | 0.00 |
| ATOM | 1613 | NE2  | GLN | 102 | 11.558 | 29.246 | 24.555 | 0.00 | 0.00 |
| ATOM | 1614 | 1HE2 | GLN | 102 | 11.031 | 29.481 | 25.333 | 0.00 | 0.00 |
| ATOM | 1615 | 2HE2 | GLN | 102 | 11.205 | 28.897 | 23.779 | 0.00 | 0.00 |
| ATOM | 1616 | C    | GLN | 102 | 15.404 | 27.194 | 21.768 | 0.00 | 0.00 |
| ATOM | 1617 | O    | GLN | 102 | 15.602 | 26.143 | 22.266 | 0.00 | 0.00 |
| ATOM | 1618 | N    | HIP | 103 | 14.798 | 27.253 | 20.623 | 0.00 | 0.00 |
| ATOM | 1619 | H    | HIP | 103 | 14.673 | 28.142 | 20.260 | 0.00 | 0.00 |
| ATOM | 1620 | CA   | HIP | 103 | 14.232 | 26.117 | 19.899 | 0.00 | 0.00 |
| ATOM | 1621 | HA   | HIP | 103 | 14.334 | 25.252 | 20.498 | 0.00 | 0.00 |
| ATOM | 1622 | CB   | HIP | 103 | 12.759 | 26.354 | 19.716 | 0.00 | 0.00 |
| ATOM | 1623 | HB2  | HIP | 103 | 12.371 | 26.747 | 20.614 | 0.00 | 0.00 |
| ATOM | 1624 | HB3  | HIP | 103 | 12.622 | 27.077 | 18.973 | 0.00 | 0.00 |
| ATOM | 1625 | CG   | HIP | 103 | 11.969 | 25.167 | 19.358 | 0.00 | 0.00 |
| ATOM | 1626 | ND1  | HIP | 103 | 11.676 | 24.197 | 20.044 | 0.00 | 0.00 |
| ATOM | 1627 | HD1  | HIP | 103 | 11.932 | 24.169 | 20.867 | 0.00 | 0.00 |
| ATOM | 1628 | CE1  | HIP | 103 | 10.960 | 23.325 | 19.425 | 0.00 | 0.00 |
| ATOM | 1629 | HE1  | HIP | 103 | 10.579 | 22.469 | 19.720 | 0.00 | 0.00 |
| ATOM | 1630 | NE2  | HIP | 103 | 10.787 | 23.706 | 18.368 | 0.00 | 0.00 |
| ATOM | 1631 | HE2  | HIP | 103 | 10.287 | 23.237 | 17.730 | 0.00 | 0.00 |
| ATOM | 1632 | CD2  | HIP | 103 | 11.414 | 24.860 | 18.308 | 0.00 | 0.00 |
| ATOM | 1633 | HD2  | HIP | 103 | 11.453 | 25.418 | 17.581 | 0.00 | 0.00 |
| ATOM | 1634 | C    | HIP | 103 | 14.967 | 25.789 | 18.618 | 0.00 | 0.00 |
| ATOM | 1635 | O    | HIP | 103 | 14.440 | 25.392 | 17.725 | 0.00 | 0.00 |
| ATOM | 1636 | N    | LEU | 104 | 16.185 | 25.985 | 18.515 | 0.00 | 0.00 |
| ATOM | 1637 | H    | LEU | 104 | 16.544 | 26.295 | 19.292 | 0.00 | 0.00 |
| ATOM | 1638 | CA   | LEU | 104 | 17.054 | 25.744 | 17.371 | 0.00 | 0.00 |
| ATOM | 1639 | HA   | LEU | 104 | 16.456 | 25.614 | 16.491 | 0.00 | 0.00 |
| ATOM | 1640 | CB   | LEU | 104 | 17.961 | 26.949 | 17.163 | 0.00 | 0.00 |
| ATOM | 1641 | HB2  | LEU | 104 | 18.538 | 27.080 | 18.048 | 0.00 | 0.00 |
| ATOM | 1642 | HB3  | LEU | 104 | 18.641 | 26.732 | 16.365 | 0.00 | 0.00 |
| ATOM | 1643 | CG   | LEU | 104 | 17.266 | 28.270 | 16.857 | 0.00 | 0.00 |
| ATOM | 1644 | HG   | LEU | 104 | 16.608 | 28.534 | 17.651 | 0.00 | 0.00 |
| ATOM | 1645 | CD1  | LEU | 104 | 18.290 | 29.350 | 16.749 | 0.00 | 0.00 |
| ATOM | 1646 | 1HD1 | LEU | 104 | 18.721 | 29.395 | 17.185 | 0.00 | 0.00 |
| ATOM | 1647 | 2HD1 | LEU | 104 | 18.707 | 29.401 | 16.256 | 0.00 | 0.00 |
| ATOM | 1648 | 3HD1 | LEU | 104 | 18.181 | 30.018 | 16.736 | 0.00 | 0.00 |
| ATOM | 1649 | CD2  | LEU | 104 | 16.500 | 28.246 | 15.586 | 0.00 | 0.00 |
| ATOM | 1650 | 1HD2 | LEU | 104 | 16.432 | 27.816 | 15.179 | 0.00 | 0.00 |
| ATOM | 1651 | 2HD2 | LEU | 104 | 15.932 | 28.312 | 15.539 | 0.00 | 0.00 |
| ATOM | 1652 | 3HD2 | LEU | 104 | 16.551 | 28.594 | 15.127 | 0.00 | 0.00 |
| ATOM | 1653 | C    | LEU | 104 | 17.882 | 24.472 | 17.527 | 0.00 | 0.00 |
| ATOM | 1654 | O    | LEU | 104 | 18.127 | 24.019 | 18.624 | 0.00 | 0.00 |
| ATOM | 1655 | N    | GLN | 105 | 18.380 | 23.934 | 16.433 | 0.00 | 0.00 |
| ATOM | 1656 | H    | GLN | 105 | 18.176 | 24.385 | 15.576 | 0.00 | 0.00 |
| ATOM | 1657 | CA   | GLN | 105 | 19.405 | 22.892 | 16.419 | 0.00 | 0.00 |
| ATOM | 1658 | HA   | GLN | 105 | 19.111 | 22.120 | 17.106 | 0.00 | 0.00 |
| ATOM | 1659 | CB   | GLN | 105 | 19.505 | 22.292 | 15.027 | 0.00 | 0.00 |
| ATOM | 1660 | HB2  | GLN | 105 | 19.767 | 23.063 | 14.344 | 0.00 | 0.00 |
| ATOM | 1661 | HB3  | GLN | 105 | 20.297 | 21.575 | 15.001 | 0.00 | 0.00 |
| ATOM | 1662 | CG   | GLN | 105 | 18.248 | 21.627 | 14.528 | 0.00 | 0.00 |
| ATOM | 1663 | HG2  | GLN | 105 | 17.485 | 22.211 | 14.594 | 0.00 | 0.00 |
| ATOM | 1664 | HG3  | GLN | 105 | 18.332 | 21.414 | 13.592 | 0.00 | 0.00 |
| ATOM | 1665 | CD   | GLN | 105 | 17.905 | 20.454 | 15.127 | 0.00 | 0.00 |
| ATOM | 1666 | OE1  | GLN | 105 | 18.470 | 19.943 | 15.728 | 0.00 | 0.00 |
| ATOM | 1667 | NE2  | GLN | 105 | 16.980 | 19.972 | 14.995 | 0.00 | 0.00 |
| ATOM | 1668 | 1HE2 | GLN | 105 | 16.761 | 19.206 | 15.390 | 0.00 | 0.00 |
| ATOM | 1669 | 2HE2 | GLN | 105 | 16.495 | 20.370 | 14.514 | 0.00 | 0.00 |
| ATOM | 1670 | C    | GLN | 105 | 20.761 | 23.441 | 16.872 | 0.00 | 0.00 |
| ATOM | 1671 | O    | GLN | 105 | 20.956 | 24.640 | 16.824 | 0.00 | 0.00 |
| ATOM | 1672 | N    | PRO | 106 | 21.730 | 22.622 | 17.295 | 0.00 | 0.00 |
| ATOM | 1673 | CD   | PRO | 106 | 21.617 | 21.204 | 17.493 | 0.00 | 0.00 |
| ATOM | 1674 | HD2  | PRO | 106 | 21.664 | 20.699 | 16.596 | 0.00 | 0.00 |
| ATOM | 1675 | HD3  | PRO | 106 | 20.743 | 20.952 | 17.984 | 0.00 | 0.00 |
| ATOM | 1676 | CG   | PRO | 106 | 22.757 | 20.805 | 18.314 | 0.00 | 0.00 |
| ATOM | 1677 | HG2  | PRO | 106 | 23.175 | 20.090 | 17.946 | 0.00 | 0.00 |
| ATOM | 1678 | HG3  | PRO | 106 | 22.478 | 20.605 | 19.152 | 0.00 | 0.00 |
| ATOM | 1679 | CB   | PRO | 106 | 23.655 | 21.857 | 18.417 | 0.00 | 0.00 |

|      |      |      |     |     |        |        |        |      |      |
|------|------|------|-----|-----|--------|--------|--------|------|------|
| ATOM | 1680 | HB2  | PRO | 106 | 23.865 | 21.972 | 19.335 | 0.00 | 0.00 |
| ATOM | 1681 | HB3  | PRO | 106 | 24.445 | 21.618 | 17.946 | 0.00 | 0.00 |
| ATOM | 1682 | CA   | PRO | 106 | 23.007 | 23.083 | 17.831 | 0.00 | 0.00 |
| ATOM | 1683 | HA   | PRO | 106 | 22.800 | 23.773 | 18.617 | 0.00 | 0.00 |
| ATOM | 1684 | C    | PRO | 106 | 23.949 | 23.784 | 16.855 | 0.00 | 0.00 |
| ATOM | 1685 | O    | PRO | 106 | 24.939 | 24.339 | 17.274 | 0.00 | 0.00 |
| ATOM | 1686 | N    | THR | 107 | 23.676 | 23.768 | 15.567 | 0.00 | 0.00 |
| ATOM | 1687 | H    | THR | 107 | 22.828 | 23.361 | 15.285 | 0.00 | 0.00 |
| ATOM | 1688 | CA   | THR | 107 | 24.513 | 24.307 | 14.498 | 0.00 | 0.00 |
| ATOM | 1689 | HA   | THR | 107 | 25.546 | 24.139 | 14.749 | 0.00 | 0.00 |
| ATOM | 1690 | CB   | THR | 107 | 24.243 | 23.574 | 13.191 | 0.00 | 0.00 |
| ATOM | 1691 | HB   | THR | 107 | 24.751 | 24.038 | 12.418 | 0.00 | 0.00 |
| ATOM | 1692 | CG2  | THR | 107 | 24.658 | 22.175 | 13.214 | 0.00 | 0.00 |
| ATOM | 1693 | 1HG2 | THR | 107 | 24.854 | 21.892 | 13.205 | 0.00 | 0.00 |
| ATOM | 1694 | 2HG2 | THR | 107 | 24.742 | 21.820 | 13.314 | 0.00 | 0.00 |
| ATOM | 1695 | 3HG2 | THR | 107 | 24.709 | 21.794 | 13.123 | 0.00 | 0.00 |
| ATOM | 1696 | OG1  | THR | 107 | 22.933 | 23.577 | 12.891 | 0.00 | 0.00 |
| ATOM | 1697 | HG1  | THR | 107 | 22.768 | 23.146 | 12.164 | 0.00 | 0.00 |
| ATOM | 1698 | C    | THR | 107 | 24.337 | 25.804 | 14.300 | 0.00 | 0.00 |
| ATOM | 1699 | O    | THR | 107 | 23.307 | 26.360 | 14.591 | 0.00 | 0.00 |
| ATOM | 1700 | N    | ALA | 108 | 25.336 | 26.476 | 13.767 | 0.00 | 0.00 |
| ATOM | 1701 | H    | ALA | 108 | 26.153 | 25.979 | 13.526 | 0.00 | 0.00 |
| ATOM | 1702 | CA   | ALA | 108 | 25.260 | 27.892 | 13.434 | 0.00 | 0.00 |
| ATOM | 1703 | HA   | ALA | 108 | 24.824 | 28.412 | 14.268 | 0.00 | 0.00 |
| ATOM | 1704 | CB   | ALA | 108 | 26.665 | 28.429 | 13.227 | 0.00 | 0.00 |
| ATOM | 1705 | HB1  | ALA | 108 | 27.129 | 28.340 | 13.387 | 0.00 | 0.00 |
| ATOM | 1706 | HB2  | ALA | 108 | 26.973 | 28.498 | 12.850 | 0.00 | 0.00 |
| ATOM | 1707 | HB3  | ALA | 108 | 26.907 | 28.858 | 13.287 | 0.00 | 0.00 |
| ATOM | 1708 | C    | ALA | 108 | 24.366 | 28.157 | 12.222 | 0.00 | 0.00 |
| ATOM | 1709 | O    | ALA | 108 | 23.588 | 29.089 | 12.226 | 0.00 | 0.00 |
| ATOM | 1710 | N    | GLU | 109 | 24.392 | 27.291 | 11.216 | 0.00 | 0.00 |
| ATOM | 1711 | H    | GLU | 109 | 25.067 | 26.564 | 11.247 | 0.00 | 0.00 |
| ATOM | 1712 | CA   | GLU | 109 | 23.590 | 27.443 | 10.003 | 0.00 | 0.00 |
| ATOM | 1713 | HA   | GLU | 109 | 23.777 | 28.425 | 9.610  | 0.00 | 0.00 |
| ATOM | 1714 | CB   | GLU | 109 | 24.044 | 26.461 | 8.934  | 0.00 | 0.00 |
| ATOM | 1715 | HB2  | GLU | 109 | 23.510 | 26.661 | 8.035  | 0.00 | 0.00 |
| ATOM | 1716 | HB3  | GLU | 109 | 25.066 | 26.657 | 8.741  | 0.00 | 0.00 |
| ATOM | 1717 | CG   | GLU | 109 | 23.908 | 25.008 | 9.263  | 0.00 | 0.00 |
| ATOM | 1718 | HG2  | GLU | 109 | 24.413 | 24.691 | 9.606  | 0.00 | 0.00 |
| ATOM | 1719 | HG3  | GLU | 109 | 23.406 | 24.862 | 9.657  | 0.00 | 0.00 |
| ATOM | 1720 | CD   | GLU | 109 | 23.778 | 24.156 | 8.575  | 0.00 | 0.00 |
| ATOM | 1721 | OE1  | GLU | 109 | 23.714 | 23.664 | 8.625  | 0.00 | 0.00 |
| ATOM | 1722 | OE2  | GLU | 109 | 23.750 | 23.948 | 7.992  | 0.00 | 0.00 |
| ATOM | 1723 | C    | GLU | 109 | 22.084 | 27.386 | 10.233 | 0.00 | 0.00 |
| ATOM | 1724 | O    | GLU | 109 | 21.342 | 28.035 | 9.520  | 0.00 | 0.00 |
| ATOM | 1725 | N    | ASN | 110 | 21.620 | 26.690 | 11.265 | 0.00 | 0.00 |
| ATOM | 1726 | H    | ASN | 110 | 22.263 | 26.173 | 11.807 | 0.00 | 0.00 |
| ATOM | 1727 | CA   | ASN | 110 | 20.215 | 26.675 | 11.657 | 0.00 | 0.00 |
| ATOM | 1728 | HA   | ASN | 110 | 19.618 | 26.543 | 10.769 | 0.00 | 0.00 |
| ATOM | 1729 | CB   | ASN | 110 | 20.002 | 25.467 | 12.568 | 0.00 | 0.00 |
| ATOM | 1730 | HB2  | ASN | 110 | 20.410 | 24.596 | 12.099 | 0.00 | 0.00 |
| ATOM | 1731 | HB3  | ASN | 110 | 20.512 | 25.610 | 13.496 | 0.00 | 0.00 |
| ATOM | 1732 | CG   | ASN | 110 | 18.559 | 25.197 | 12.855 | 0.00 | 0.00 |
| ATOM | 1733 | OD1  | ASN | 110 | 18.063 | 25.445 | 13.903 | 0.00 | 0.00 |
| ATOM | 1734 | ND2  | ASN | 110 | 17.856 | 24.655 | 11.948 | 0.00 | 0.00 |
| ATOM | 1735 | 1HD2 | ASN | 110 | 16.912 | 24.464 | 12.134 | 0.00 | 0.00 |
| ATOM | 1736 | 2HD2 | ASN | 110 | 18.261 | 24.423 | 11.095 | 0.00 | 0.00 |
| ATOM | 1737 | C    | ASN | 110 | 19.784 | 27.992 | 12.306 | 0.00 | 0.00 |
| ATOM | 1738 | O    | ASN | 110 | 18.661 | 28.419 | 12.131 | 0.00 | 0.00 |
| ATOM | 1739 | N    | ALA | 111 | 20.686 | 28.669 | 13.000 | 0.00 | 0.00 |
| ATOM | 1740 | H    | ALA | 111 | 21.593 | 28.286 | 13.076 | 0.00 | 0.00 |
| ATOM | 1741 | CA   | ALA | 111 | 20.454 | 29.991 | 13.561 | 0.00 | 0.00 |
| ATOM | 1742 | HA   | ALA | 111 | 19.472 | 30.009 | 14.008 | 0.00 | 0.00 |
| ATOM | 1743 | CB   | ALA | 111 | 21.461 | 30.255 | 14.671 | 0.00 | 0.00 |
| ATOM | 1744 | HB1  | ALA | 111 | 21.619 | 30.667 | 14.929 | 0.00 | 0.00 |
| ATOM | 1745 | HB2  | ALA | 111 | 21.524 | 30.110 | 15.153 | 0.00 | 0.00 |
| ATOM | 1746 | HB3  | ALA | 111 | 21.949 | 30.200 | 14.736 | 0.00 | 0.00 |
| ATOM | 1747 | C    | ALA | 111 | 20.470 | 31.095 | 12.500 | 0.00 | 0.00 |
| ATOM | 1748 | O    | ALA | 111 | 19.631 | 31.969 | 12.548 | 0.00 | 0.00 |
| ATOM | 1749 | N    | TYR | 112 | 21.351 | 31.023 | 11.508 | 0.00 | 0.00 |
| ATOM | 1750 | H    | TYR | 112 | 22.042 | 30.311 | 11.543 | 0.00 | 0.00 |
| ATOM | 1751 | CA   | TYR | 112 | 21.356 | 31.937 | 10.362 | 0.00 | 0.00 |
| ATOM | 1752 | HA   | TYR | 112 | 21.449 | 32.949 | 10.729 | 0.00 | 0.00 |
| ATOM | 1753 | CB   | TYR | 112 | 22.545 | 31.642 | 9.446  | 0.00 | 0.00 |
| ATOM | 1754 | HB2  | TYR | 112 | 22.393 | 30.667 | 9.020  | 0.00 | 0.00 |
| ATOM | 1755 | HB3  | TYR | 112 | 22.514 | 32.339 | 8.631  | 0.00 | 0.00 |
| ATOM | 1756 | CG   | TYR | 112 | 23.949 | 31.698 | 10.016 | 0.00 | 0.00 |
| ATOM | 1757 | CD1  | TYR | 112 | 24.290 | 32.512 | 11.084 | 0.00 | 0.00 |
| ATOM | 1758 | HD1  | TYR | 112 | 23.554 | 33.126 | 11.529 | 0.00 | 0.00 |
| ATOM | 1759 | CE1  | TYR | 112 | 25.599 | 32.537 | 11.568 | 0.00 | 0.00 |
| ATOM | 1760 | HE1  | TYR | 112 | 25.862 | 33.160 | 12.373 | 0.00 | 0.00 |
| ATOM | 1761 | CZ   | TYR | 112 | 26.583 | 31.752 | 10.987 | 0.00 | 0.00 |
| ATOM | 1762 | OH   | TYR | 112 | 27.843 | 31.756 | 11.459 | 0.00 | 0.00 |
| ATOM | 1763 | HH   | TYR | 112 | 28.389 | 31.171 | 10.979 | 0.00 | 0.00 |
| ATOM | 1764 | CE2  | TYR | 112 | 26.254 | 30.960 | 9.907  | 0.00 | 0.00 |
| ATOM | 1765 | HE2  | TYR | 112 | 27.007 | 30.377 | 9.450  | 0.00 | 0.00 |
| ATOM | 1766 | CD2  | TYR | 112 | 24.946 | 30.943 | 9.422  | 0.00 | 0.00 |
| ATOM | 1767 | HD2  | TYR | 112 | 24.702 | 30.353 | 8.583  | 0.00 | 0.00 |
| ATOM | 1768 | C    | TYR | 112 | 20.050 | 31.854 | 9.564  | 0.00 | 0.00 |
| ATOM | 1769 | O    | TYR | 112 | 19.484 | 32.869 | 9.197  | 0.00 | 0.00 |
| ATOM | 1770 | N    | GLU | 113 | 19.521 | 30.654 | 9.347  | 0.00 | 0.00 |
| ATOM | 1771 | H    | GLU | 113 | 20.037 | 29.860 | 9.648  | 0.00 | 0.00 |
| ATOM | 1772 | CA   | GLU | 113 | 18.274 | 30.414 | 8.631  | 0.00 | 0.00 |
| ATOM | 1773 | HA   | GLU | 113 | 18.317 | 30.935 | 7.695  | 0.00 | 0.00 |
| ATOM | 1774 | CB   | GLU | 113 | 18.169 | 28.927 | 8.349  | 0.00 | 0.00 |
| ATOM | 1775 | HB2  | GLU | 113 | 19.078 | 28.589 | 7.935  | 0.00 | 0.00 |
| ATOM | 1776 | HB3  | GLU | 113 | 18.042 | 28.415 | 9.258  | 0.00 | 0.00 |
| ATOM | 1777 | CG   | GLU | 113 | 17.067 | 28.514 | 7.440  | 0.00 | 0.00 |
| ATOM | 1778 | HG2  | GLU | 113 | 16.981 | 27.574 | 7.446  | 0.00 | 0.00 |
| ATOM | 1779 | HG3  | GLU | 113 | 16.250 | 28.854 | 7.737  | 0.00 | 0.00 |
| ATOM | 1780 | CD   | GLU | 113 | 17.165 | 28.859 | 6.140  | 0.00 | 0.00 |
| ATOM | 1781 | OE1  | GLU | 113 | 17.374 | 28.912 | 5.648  | 0.00 | 0.00 |
| ATOM | 1782 | OE2  | GLU | 113 | 17.027 | 29.087 | 5.595  | 0.00 | 0.00 |
| ATOM | 1783 | C    | GLU | 113 | 17.047 | 30.950 | 9.370  | 0.00 | 0.00 |
| ATOM | 1784 | O    | GLU | 113 | 16.116 | 31.346 | 8.758  | 0.00 | 0.00 |

|      |      |      |     |     |        |        |        |      |      |
|------|------|------|-----|-----|--------|--------|--------|------|------|
| ATOM | 1785 | N    | TYR | 114 | 17.052 | 31.015 | 10.674 | 0.00 | 0.00 |
| ATOM | 1786 | H    | TYR | 114 | 17.823 | 30.644 | 11.124 | 0.00 | 0.00 |
| ATOM | 1787 | CA   | TYR | 114 | 15.990 | 31.618 | 11.470 | 0.00 | 0.00 |
| ATOM | 1788 | HA   | TYR | 114 | 15.047 | 31.429 | 10.985 | 0.00 | 0.00 |
| ATOM | 1789 | CB   | TYR | 114 | 15.936 | 30.949 | 12.833 | 0.00 | 0.00 |
| ATOM | 1790 | HB2  | TYR | 114 | 15.891 | 29.887 | 12.707 | 0.00 | 0.00 |
| ATOM | 1791 | HB3  | TYR | 114 | 16.837 | 31.155 | 13.365 | 0.00 | 0.00 |
| ATOM | 1792 | CG   | TYR | 114 | 14.761 | 31.369 | 13.666 | 0.00 | 0.00 |
| ATOM | 1793 | CD1  | TYR | 114 | 13.515 | 30.978 | 13.334 | 0.00 | 0.00 |
| ATOM | 1794 | HD1  | TYR | 114 | 13.399 | 30.368 | 12.504 | 0.00 | 0.00 |
| ATOM | 1795 | CE1  | TYR | 114 | 12.421 | 31.390 | 14.085 | 0.00 | 0.00 |
| ATOM | 1796 | HE1  | TYR | 114 | 11.473 | 31.095 | 13.833 | 0.00 | 0.00 |
| ATOM | 1797 | CZ   | TYR | 114 | 12.570 | 32.202 | 15.159 | 0.00 | 0.00 |
| ATOM | 1798 | OH   | TYR | 114 | 11.527 | 32.596 | 15.883 | 0.00 | 0.00 |
| ATOM | 1799 | HH   | TYR | 114 | 10.751 | 32.314 | 15.538 | 0.00 | 0.00 |
| ATOM | 1800 | CE2  | TYR | 114 | 13.813 | 32.587 | 15.494 | 0.00 | 0.00 |
| ATOM | 1801 | HE2  | TYR | 114 | 13.911 | 33.204 | 16.320 | 0.00 | 0.00 |
| ATOM | 1802 | CD2  | TYR | 114 | 14.906 | 32.172 | 14.749 | 0.00 | 0.00 |
| ATOM | 1803 | HD2  | TYR | 114 | 15.851 | 32.472 | 15.000 | 0.00 | 0.00 |
| ATOM | 1804 | C    | TYR | 114 | 16.128 | 33.131 | 11.595 | 0.00 | 0.00 |
| ATOM | 1805 | O    | TYR | 114 | 15.158 | 33.848 | 11.434 | 0.00 | 0.00 |
| ATOM | 1806 | N    | PHE | 115 | 17.334 | 33.641 | 11.798 | 0.00 | 0.00 |
| ATOM | 1807 | H    | PHE | 115 | 18.090 | 33.006 | 11.905 | 0.00 | 0.00 |
| ATOM | 1808 | CA   | PHE | 115 | 17.615 | 35.067 | 11.924 | 0.00 | 0.00 |
| ATOM | 1809 | HA   | PHE | 115 | 17.063 | 35.457 | 12.762 | 0.00 | 0.00 |
| ATOM | 1810 | CB   | PHE | 115 | 19.100 | 35.245 | 12.208 | 0.00 | 0.00 |
| ATOM | 1811 | HB2  | PHE | 115 | 19.361 | 34.625 | 13.034 | 0.00 | 0.00 |
| ATOM | 1812 | HB3  | PHE | 115 | 19.658 | 34.888 | 11.372 | 0.00 | 0.00 |
| ATOM | 1813 | CG   | PHE | 115 | 19.566 | 36.635 | 12.517 | 0.00 | 0.00 |
| ATOM | 1814 | CD1  | PHE | 115 | 19.755 | 37.018 | 13.811 | 0.00 | 0.00 |
| ATOM | 1815 | HD1  | PHE | 115 | 19.531 | 36.348 | 14.585 | 0.00 | 0.00 |
| ATOM | 1816 | CE1  | PHE | 115 | 20.270 | 38.268 | 14.099 | 0.00 | 0.00 |
| ATOM | 1817 | HE1  | PHE | 115 | 20.429 | 38.551 | 15.084 | 0.00 | 0.00 |
| ATOM | 1818 | CZ   | PHE | 115 | 20.581 | 39.146 | 13.090 | 0.00 | 0.00 |
| ATOM | 1819 | HZ   | PHE | 115 | 20.975 | 40.100 | 13.305 | 0.00 | 0.00 |
| ATOM | 1820 | CE2  | PHE | 115 | 20.375 | 38.776 | 11.799 | 0.00 | 0.00 |
| ATOM | 1821 | HE2  | PHE | 115 | 20.608 | 39.447 | 11.029 | 0.00 | 0.00 |
| ATOM | 1822 | CD2  | PHE | 115 | 19.875 | 37.525 | 11.516 | 0.00 | 0.00 |
| ATOM | 1823 | HD2  | PHE | 115 | 19.737 | 37.255 | 10.519 | 0.00 | 0.00 |
| ATOM | 1824 | C    | PHE | 115 | 17.174 | 35.854 | 10.696 | 0.00 | 0.00 |
| ATOM | 1825 | O    | PHE | 115 | 16.511 | 36.865 | 10.815 | 0.00 | 0.00 |
| ATOM | 1826 | N    | THR | 116 | 17.451 | 35.350 | 9.501  | 0.00 | 0.00 |
| ATOM | 1827 | H    | THR | 116 | 17.951 | 34.495 | 9.458  | 0.00 | 0.00 |
| ATOM | 1828 | CA   | THR | 116 | 17.054 | 35.968 | 8.233  | 0.00 | 0.00 |
| ATOM | 1829 | HA   | THR | 116 | 17.350 | 36.995 | 8.260  | 0.00 | 0.00 |
| ATOM | 1830 | CB   | THR | 116 | 17.761 | 35.335 | 7.049  | 0.00 | 0.00 |
| ATOM | 1831 | HB   | THR | 116 | 17.318 | 35.695 | 6.145  | 0.00 | 0.00 |
| ATOM | 1832 | CG2  | THR | 116 | 19.226 | 35.657 | 7.012  | 0.00 | 0.00 |
| ATOM | 1833 | 1HG2 | THR | 116 | 19.588 | 35.744 | 7.037  | 0.00 | 0.00 |
| ATOM | 1834 | 2HG2 | THR | 116 | 19.567 | 35.708 | 6.983  | 0.00 | 0.00 |
| ATOM | 1835 | 3HG2 | THR | 116 | 19.580 | 35.769 | 6.975  | 0.00 | 0.00 |
| ATOM | 1836 | OG1  | THR | 116 | 17.641 | 33.967 | 7.078  | 0.00 | 0.00 |
| ATOM | 1837 | HG1  | THR | 116 | 18.139 | 33.642 | 7.253  | 0.00 | 0.00 |
| ATOM | 1838 | C    | THR | 116 | 15.553 | 35.995 | 7.984  | 0.00 | 0.00 |
| ATOM | 1839 | O    | THR | 116 | 15.108 | 36.730 | 7.158  | 0.00 | 0.00 |
| ATOM | 1840 | N    | LYS | 117 | 14.755 | 35.256 | 8.722  | 0.00 | 0.00 |
| ATOM | 1841 | H    | LYS | 117 | 15.186 | 34.667 | 9.371  | 0.00 | 0.00 |
| ATOM | 1842 | CA   | LYS | 117 | 13.294 | 35.306 | 8.674  | 0.00 | 0.00 |
| ATOM | 1843 | HA   | LYS | 117 | 12.992 | 35.585 | 7.685  | 0.00 | 0.00 |
| ATOM | 1844 | CB   | LYS | 117 | 12.716 | 33.933 | 8.955  | 0.00 | 0.00 |
| ATOM | 1845 | HB2  | LYS | 117 | 13.040 | 33.572 | 9.816  | 0.00 | 0.00 |
| ATOM | 1846 | HB3  | LYS | 117 | 11.730 | 33.989 | 9.030  | 0.00 | 0.00 |
| ATOM | 1847 | CG   | LYS | 117 | 12.989 | 32.960 | 7.980  | 0.00 | 0.00 |
| ATOM | 1848 | HG2  | LYS | 117 | 12.656 | 33.305 | 7.152  | 0.00 | 0.00 |
| ATOM | 1849 | HG3  | LYS | 117 | 13.948 | 32.890 | 7.909  | 0.00 | 0.00 |
| ATOM | 1850 | CD   | LYS | 117 | 12.397 | 31.624 | 8.251  | 0.00 | 0.00 |
| ATOM | 1851 | HD2  | LYS | 117 | 12.723 | 31.263 | 8.955  | 0.00 | 0.00 |
| ATOM | 1852 | HD3  | LYS | 117 | 11.563 | 31.683 | 8.380  | 0.00 | 0.00 |
| ATOM | 1853 | CE   | LYS | 117 | 12.503 | 30.713 | 7.365  | 0.00 | 0.00 |
| ATOM | 1854 | HE2  | LYS | 117 | 11.973 | 30.468 | 7.162  | 0.00 | 0.00 |
| ATOM | 1855 | HE3  | LYS | 117 | 12.769 | 30.988 | 6.783  | 0.00 | 0.00 |
| ATOM | 1856 | NZ   | LYS | 117 | 12.931 | 29.812 | 7.537  | 0.00 | 0.00 |
| ATOM | 1857 | HZ1  | LYS | 117 | 13.041 | 29.702 | 7.775  | 0.00 | 0.00 |
| ATOM | 1858 | HZ2  | LYS | 117 | 12.913 | 29.496 | 7.542  | 0.00 | 0.00 |
| ATOM | 1859 | HZ3  | LYS | 117 | 13.161 | 29.561 | 7.416  | 0.00 | 0.00 |
| ATOM | 1860 | C    | LYS | 117 | 12.675 | 36.337 | 9.596  | 0.00 | 0.00 |
| ATOM | 1861 | O    | LYS | 117 | 11.584 | 36.749 | 9.347  | 0.00 | 0.00 |
| ATOM | 1862 | N    | ILE | 118 | 13.337 | 36.765 | 10.640 | 0.00 | 0.00 |
| ATOM | 1863 | H    | ILE | 118 | 14.217 | 36.378 | 10.774 | 0.00 | 0.00 |
| ATOM | 1864 | CA   | ILE | 118 | 12.781 | 37.671 | 11.661 | 0.00 | 0.00 |
| ATOM | 1865 | HA   | ILE | 118 | 11.779 | 37.932 | 11.363 | 0.00 | 0.00 |
| ATOM | 1866 | CB   | ILE | 118 | 12.641 | 36.976 | 13.017 | 0.00 | 0.00 |
| ATOM | 1867 | HB   | ILE | 118 | 12.149 | 37.670 | 13.668 | 0.00 | 0.00 |
| ATOM | 1868 | CG2  | ILE | 118 | 11.733 | 35.764 | 12.910 | 0.00 | 0.00 |
| ATOM | 1869 | 1HG2 | ILE | 118 | 11.590 | 35.437 | 12.754 | 0.00 | 0.00 |
| ATOM | 1870 | 2HG2 | ILE | 118 | 11.552 | 35.404 | 13.023 | 0.00 | 0.00 |
| ATOM | 1871 | 3HG2 | ILE | 118 | 11.378 | 35.565 | 12.881 | 0.00 | 0.00 |
| ATOM | 1872 | CG1  | ILE | 118 | 13.968 | 36.609 | 13.657 | 0.00 | 0.00 |
| ATOM | 1873 | 2HG1 | ILE | 118 | 14.392 | 35.825 | 13.165 | 0.00 | 0.00 |
| ATOM | 1874 | 3HG1 | ILE | 118 | 14.614 | 37.392 | 13.600 | 0.00 | 0.00 |
| ATOM | 1875 | CD1  | ILE | 118 | 13.900 | 36.248 | 15.071 | 0.00 | 0.00 |
| ATOM | 1876 | 1HD1 | ILE | 118 | 13.730 | 36.201 | 15.398 | 0.00 | 0.00 |
| ATOM | 1877 | 2HD1 | ILE | 118 | 13.943 | 36.025 | 15.395 | 0.00 | 0.00 |
| ATOM | 1878 | 3HD1 | ILE | 118 | 14.001 | 36.261 | 15.451 | 0.00 | 0.00 |
| ATOM | 1879 | C    | ILE | 118 | 13.489 | 39.014 | 11.805 | 0.00 | 0.00 |
| ATOM | 1880 | O    | ILE | 118 | 12.862 | 39.961 | 12.237 | 0.00 | 0.00 |
| ATOM | 1881 | N    | ALA | 119 | 14.764 | 39.132 | 11.462 | 0.00 | 0.00 |
| ATOM | 1882 | H    | ALA | 119 | 15.237 | 38.337 | 11.102 | 0.00 | 0.00 |
| ATOM | 1883 | CA   | ALA | 119 | 15.575 | 40.298 | 11.786 | 0.00 | 0.00 |
| ATOM | 1884 | HA   | ALA | 119 | 15.474 | 40.484 | 12.832 | 0.00 | 0.00 |
| ATOM | 1885 | CB   | ALA | 119 | 17.020 | 39.962 | 11.525 | 0.00 | 0.00 |
| ATOM | 1886 | HB1  | ALA | 119 | 17.351 | 39.832 | 11.488 | 0.00 | 0.00 |
| ATOM | 1887 | HB2  | ALA | 119 | 17.374 | 39.886 | 11.412 | 0.00 | 0.00 |
| ATOM | 1888 | HB3  | ALA | 119 | 17.379 | 39.927 | 11.498 | 0.00 | 0.00 |
| ATOM | 1889 | C    | ALA | 119 | 15.168 | 41.601 | 11.101 | 0.00 | 0.00 |

|      |      |      |     |     |        |        |        |      |      |
|------|------|------|-----|-----|--------|--------|--------|------|------|
| ATOM | 1890 | O    | ALA | 119 | 15.412 | 42.660 | 11.633 | 0.00 | 0.00 |
| ATOM | 1891 | N    | THR | 120 | 14.502 | 41.552 | 9.965  | 0.00 | 0.00 |
| ATOM | 1892 | H    | THR | 120 | 14.335 | 40.665 | 9.569  | 0.00 | 0.00 |
| ATOM | 1893 | CA   | THR | 120 | 14.013 | 42.735 | 9.262  | 0.00 | 0.00 |
| ATOM | 1894 | HA   | THR | 120 | 14.809 | 43.443 | 9.209  | 0.00 | 0.00 |
| ATOM | 1895 | CB   | THR | 120 | 13.616 | 42.404 | 7.842  | 0.00 | 0.00 |
| ATOM | 1896 | HB   | THR | 120 | 12.873 | 42.359 | 7.648  | 0.00 | 0.00 |
| ATOM | 1897 | CG2  | THR | 120 | 13.929 | 43.011 | 6.994  | 0.00 | 0.00 |
| ATOM | 1898 | 1HG2 | THR | 120 | 14.231 | 43.163 | 6.713  | 0.00 | 0.00 |
| ATOM | 1899 | 2HG2 | THR | 120 | 13.837 | 43.029 | 6.664  | 0.00 | 0.00 |
| ATOM | 1900 | 3HG2 | THR | 120 | 13.953 | 43.290 | 6.972  | 0.00 | 0.00 |
| ATOM | 1901 | OG1  | THR | 120 | 13.929 | 41.560 | 7.492  | 0.00 | 0.00 |
| ATOM | 1902 | HG1  | THR | 120 | 13.627 | 41.171 | 7.132  | 0.00 | 0.00 |
| ATOM | 1903 | C    | THR | 120 | 12.872 | 43.440 | 9.986  | 0.00 | 0.00 |
| ATOM | 1904 | O    | THR | 120 | 12.694 | 44.603 | 9.838  | 0.00 | 0.00 |
| ATOM | 1905 | N    | SER | 121 | 12.154 | 42.787 | 10.846 | 0.00 | 0.00 |
| ATOM | 1906 | H    | SER | 121 | 12.347 | 41.838 | 10.939 | 0.00 | 0.00 |
| ATOM | 1907 | CA   | SER | 121 | 11.086 | 43.369 | 11.658 | 0.00 | 0.00 |
| ATOM | 1908 | HA   | SER | 121 | 10.363 | 43.805 | 10.993 | 0.00 | 0.00 |
| ATOM | 1909 | CB   | SER | 121 | 10.373 | 42.291 | 12.453 | 0.00 | 0.00 |
| ATOM | 1910 | HB2  | SER | 121 | 9.522  | 42.730 | 12.920 | 0.00 | 0.00 |
| ATOM | 1911 | HB3  | SER | 121 | 10.035 | 41.513 | 11.807 | 0.00 | 0.00 |
| ATOM | 1912 | OG   | SER | 121 | 11.187 | 41.741 | 13.426 | 0.00 | 0.00 |
| ATOM | 1913 | HG   | SER | 121 | 11.583 | 41.108 | 13.151 | 0.00 | 0.00 |
| ATOM | 1914 | C    | SER | 121 | 11.557 | 44.480 | 12.592 | 0.00 | 0.00 |
| ATOM | 1915 | O    | SER | 121 | 10.833 | 45.431 | 12.820 | 0.00 | 0.00 |
| ATOM | 1916 | N    | LEU | 122 | 12.802 | 44.418 | 13.052 | 0.00 | 0.00 |
| ATOM | 1917 | H    | LEU | 122 | 13.333 | 43.624 | 12.796 | 0.00 | 0.00 |
| ATOM | 1918 | CA   | LEU | 122 | 13.453 | 45.402 | 13.920 | 0.00 | 0.00 |
| ATOM | 1919 | HA   | LEU | 122 | 12.840 | 45.519 | 14.801 | 0.00 | 0.00 |
| ATOM | 1920 | CB   | LEU | 122 | 14.801 | 44.790 | 14.328 | 0.00 | 0.00 |
| ATOM | 1921 | HB2  | LEU | 122 | 14.603 | 43.817 | 14.738 | 0.00 | 0.00 |
| ATOM | 1922 | HB3  | LEU | 122 | 15.396 | 44.652 | 13.445 | 0.00 | 0.00 |
| ATOM | 1923 | CG   | LEU | 122 | 15.660 | 45.553 | 15.336 | 0.00 | 0.00 |
| ATOM | 1924 | HG   | LEU | 122 | 15.997 | 46.474 | 14.895 | 0.00 | 0.00 |
| ATOM | 1925 | CD1  | LEU | 122 | 14.943 | 45.884 | 16.627 | 0.00 | 0.00 |
| ATOM | 1926 | 1HD1 | LEU | 122 | 14.830 | 45.527 | 17.089 | 0.00 | 0.00 |
| ATOM | 1927 | 2HD1 | LEU | 122 | 14.400 | 46.085 | 16.690 | 0.00 | 0.00 |
| ATOM | 1928 | 3HD1 | LEU | 122 | 15.096 | 46.302 | 17.034 | 0.00 | 0.00 |
| ATOM | 1929 | CD2  | LEU | 122 | 16.883 | 44.725 | 15.694 | 0.00 | 0.00 |
| ATOM | 1930 | 1HD2 | LEU | 122 | 17.125 | 44.334 | 15.550 | 0.00 | 0.00 |
| ATOM | 1931 | 2HD2 | LEU | 122 | 17.342 | 44.781 | 15.732 | 0.00 | 0.00 |
| ATOM | 1932 | 3HD2 | LEU | 122 | 17.075 | 44.470 | 16.058 | 0.00 | 0.00 |
| ATOM | 1933 | C    | LEU | 122 | 13.612 | 46.790 | 13.276 | 0.00 | 0.00 |
| ATOM | 1934 | O    | LEU | 122 | 13.731 | 47.767 | 13.988 | 0.00 | 0.00 |
| ATOM | 1935 | N    | PHE | 123 | 13.564 | 46.891 | 11.953 | 0.00 | 0.00 |
| ATOM | 1936 | H    | PHE | 123 | 13.449 | 46.048 | 11.443 | 0.00 | 0.00 |
| ATOM | 1937 | CA   | PHE | 123 | 13.740 | 48.120 | 11.178 | 0.00 | 0.00 |
| ATOM | 1938 | HA   | PHE | 123 | 13.778 | 48.951 | 11.864 | 0.00 | 0.00 |
| ATOM | 1939 | CB   | PHE | 123 | 15.082 | 48.063 | 10.451 | 0.00 | 0.00 |
| ATOM | 1940 | HB2  | PHE | 123 | 15.068 | 47.239 | 9.768  | 0.00 | 0.00 |
| ATOM | 1941 | HB3  | PHE | 123 | 15.203 | 48.956 | 9.874  | 0.00 | 0.00 |
| ATOM | 1942 | CG   | PHE | 123 | 16.277 | 47.925 | 11.361 | 0.00 | 0.00 |
| ATOM | 1943 | CD1  | PHE | 123 | 16.818 | 49.043 | 11.974 | 0.00 | 0.00 |
| ATOM | 1944 | HD1  | PHE | 123 | 16.395 | 49.991 | 11.776 | 0.00 | 0.00 |
| ATOM | 1945 | CE1  | PHE | 123 | 17.893 | 48.923 | 12.853 | 0.00 | 0.00 |
| ATOM | 1946 | HE1  | PHE | 123 | 18.311 | 49.779 | 13.310 | 0.00 | 0.00 |
| ATOM | 1947 | CZ   | PHE | 123 | 18.421 | 47.678 | 13.130 | 0.00 | 0.00 |
| ATOM | 1948 | HZ   | PHE | 123 | 19.232 | 47.588 | 13.814 | 0.00 | 0.00 |
| ATOM | 1949 | CE2  | PHE | 123 | 17.888 | 46.556 | 12.519 | 0.00 | 0.00 |
| ATOM | 1950 | HE2  | PHE | 123 | 18.291 | 45.604 | 12.734 | 0.00 | 0.00 |
| ATOM | 1951 | CD2  | PHE | 123 | 16.826 | 46.679 | 11.627 | 0.00 | 0.00 |
| ATOM | 1952 | HD2  | PHE | 123 | 16.429 | 45.818 | 11.155 | 0.00 | 0.00 |
| ATOM | 1953 | C    | PHE | 123 | 12.580 | 48.424 | 10.222 | 0.00 | 0.00 |
| ATOM | 1954 | O    | PHE | 123 | 12.668 | 49.317 | 9.419  | 0.00 | 0.00 |
| ATOM | 1955 | N    | GLU | 124 | 11.484 | 47.700 | 10.280 | 0.00 | 0.00 |
| ATOM | 1956 | H    | GLU | 124 | 11.469 | 46.973 | 10.934 | 0.00 | 0.00 |
| ATOM | 1957 | CA   | GLU | 124 | 10.360 | 47.824 | 9.356  | 0.00 | 0.00 |
| ATOM | 1958 | HA   | GLU | 124 | 10.742 | 47.763 | 8.363  | 0.00 | 0.00 |
| ATOM | 1959 | CB   | GLU | 124 | 9.414  | 46.656 | 9.565  | 0.00 | 0.00 |
| ATOM | 1960 | HB2  | GLU | 124 | 9.893  | 45.837 | 9.674  | 0.00 | 0.00 |
| ATOM | 1961 | HB3  | GLU | 124 | 8.907  | 46.771 | 10.355 | 0.00 | 0.00 |
| ATOM | 1962 | CG   | GLU | 124 | 8.521  | 46.400 | 8.556  | 0.00 | 0.00 |
| ATOM | 1963 | HG2  | GLU | 124 | 9.001  | 46.292 | 7.793  | 0.00 | 0.00 |
| ATOM | 1964 | HG3  | GLU | 124 | 8.033  | 47.180 | 8.445  | 0.00 | 0.00 |
| ATOM | 1965 | CD   | GLU | 124 | 7.639  | 45.239 | 8.734  | 0.00 | 0.00 |
| ATOM | 1966 | OE1  | GLU | 124 | 7.516  | 44.593 | 8.589  | 0.00 | 0.00 |
| ATOM | 1967 | OE2  | GLU | 124 | 7.056  | 44.963 | 9.021  | 0.00 | 0.00 |
| ATOM | 1968 | C    | GLU | 124 | 9.630  | 49.155 | 9.443  | 0.00 | 0.00 |
| ATOM | 1969 | O    | GLU | 124 | 9.207  | 49.670 | 8.452  | 0.00 | 0.00 |
| ATOM | 1970 | N    | SER | 125 | 9.523  | 49.739 | 10.608 | 0.00 | 0.00 |
| ATOM | 1971 | H    | SER | 125 | 9.855  | 49.242 | 11.382 | 0.00 | 0.00 |
| ATOM | 1972 | CA   | SER | 125 | 8.888  | 51.031 | 10.838 | 0.00 | 0.00 |
| ATOM | 1973 | HA   | SER | 125 | 8.309  | 51.280 | 9.988  | 0.00 | 0.00 |
| ATOM | 1974 | CB   | SER | 125 | 7.940  | 50.943 | 11.981 | 0.00 | 0.00 |
| ATOM | 1975 | HB2  | SER | 125 | 7.929  | 51.354 | 12.459 | 0.00 | 0.00 |
| ATOM | 1976 | HB3  | SER | 125 | 7.313  | 50.981 | 11.905 | 0.00 | 0.00 |
| ATOM | 1977 | OG   | SER | 125 | 7.848  | 50.286 | 12.532 | 0.00 | 0.00 |
| ATOM | 1978 | HG   | SER | 125 | 7.331  | 50.151 | 12.836 | 0.00 | 0.00 |
| ATOM | 1979 | C    | SER | 125 | 9.844  | 52.178 | 11.014 | 0.00 | 0.00 |
| ATOM | 1980 | O    | SER | 125 | 9.461  | 53.218 | 11.273 | 0.00 | 0.00 |
| ATOM | 1981 | N    | GLY | 126 | 11.082 | 52.019 | 10.874 | 0.00 | 0.00 |
| ATOM | 1982 | H    | GLY | 126 | 11.354 | 51.145 | 10.661 | 0.00 | 0.00 |
| ATOM | 1983 | CA   | GLY | 126 | 12.086 | 53.045 | 10.982 | 0.00 | 0.00 |
| ATOM | 1984 | HA2  | GLY | 126 | 12.223 | 53.457 | 10.054 | 0.00 | 0.00 |
| ATOM | 1985 | HA3  | GLY | 126 | 11.747 | 53.789 | 11.606 | 0.00 | 0.00 |
| ATOM | 1986 | C    | GLY | 126 | 13.426 | 52.605 | 11.496 | 0.00 | 0.00 |
| ATOM | 1987 | O    | GLY | 126 | 13.615 | 51.457 | 11.796 | 0.00 | 0.00 |
| ATOM | 1988 | N    | ILE | 127 | 14.359 | 53.527 | 11.614 | 0.00 | 0.00 |
| ATOM | 1989 | H    | ILE | 127 | 14.121 | 54.446 | 11.367 | 0.00 | 0.00 |
| ATOM | 1990 | CA   | ILE | 127 | 15.702 | 53.321 | 12.140 | 0.00 | 0.00 |
| ATOM | 1991 | HA   | ILE | 127 | 15.699 | 52.378 | 12.667 | 0.00 | 0.00 |
| ATOM | 1992 | CB   | ILE | 127 | 16.715 | 53.169 | 11.004 | 0.00 | 0.00 |
| ATOM | 1993 | HB   | ILE | 127 | 16.397 | 52.324 | 10.422 | 0.00 | 0.00 |
| ATOM | 1994 | CG2  | ILE | 127 | 16.763 | 54.372 | 10.071 | 0.00 | 0.00 |

|      |      |      |     |     |        |        |        |      |      |
|------|------|------|-----|-----|--------|--------|--------|------|------|
| ATOM | 1995 | 1HG2 | ILE | 127 | 16.797 | 54.474 | 9.616  | 0.00 | 0.00 |
| ATOM | 1996 | 2HG2 | ILE | 127 | 16.512 | 54.753 | 9.925  | 0.00 | 0.00 |
| ATOM | 1997 | 3HG2 | ILE | 127 | 17.009 | 54.763 | 9.969  | 0.00 | 0.00 |
| ATOM | 1998 | CG1  | ILE | 127 | 18.104 | 52.831 | 11.554 | 0.00 | 0.00 |
| ATOM | 1999 | 2HG1 | ILE | 127 | 18.552 | 53.711 | 11.961 | 0.00 | 0.00 |
| ATOM | 2000 | 3HG1 | ILE | 127 | 18.005 | 52.116 | 12.338 | 0.00 | 0.00 |
| ATOM | 2001 | CD1  | ILE | 127 | 19.049 | 52.230 | 10.542 | 0.00 | 0.00 |
| ATOM | 2002 | 1HD1 | ILE | 127 | 19.369 | 52.071 | 10.376 | 0.00 | 0.00 |
| ATOM | 2003 | 2HD1 | ILE | 127 | 19.199 | 52.009 | 10.288 | 0.00 | 0.00 |
| ATOM | 2004 | 3HD1 | ILE | 127 | 19.279 | 52.171 | 10.242 | 0.00 | 0.00 |
| ATOM | 2005 | C    | ILE | 127 | 16.074 | 54.404 | 13.152 | 0.00 | 0.00 |
| ATOM | 2006 | O    | ILE | 127 | 15.863 | 55.582 | 12.930 | 0.00 | 0.00 |
| ATOM | 2007 | N    | ASN | 128 | 16.623 | 53.991 | 14.284 | 0.00 | 0.00 |
| ATOM | 2008 | H    | ASN | 128 | 16.792 | 53.020 | 14.383 | 0.00 | 0.00 |
| ATOM | 2009 | CA   | ASN | 128 | 17.120 | 54.825 | 15.376 | 0.00 | 0.00 |
| ATOM | 2010 | HA   | ASN | 128 | 17.598 | 55.699 | 14.957 | 0.00 | 0.00 |
| ATOM | 2011 | CB   | ASN | 128 | 15.943 | 55.300 | 16.236 | 0.00 | 0.00 |
| ATOM | 2012 | HB2  | ASN | 128 | 16.294 | 55.945 | 17.020 | 0.00 | 0.00 |
| ATOM | 2013 | HB3  | ASN | 128 | 15.297 | 55.893 | 15.618 | 0.00 | 0.00 |
| ATOM | 2014 | CG   | ASN | 128 | 15.122 | 54.214 | 16.877 | 0.00 | 0.00 |
| ATOM | 2015 | OD1  | ASN | 128 | 15.593 | 53.231 | 17.344 | 0.00 | 0.00 |
| ATOM | 2016 | ND2  | ASN | 128 | 13.866 | 54.369 | 16.932 | 0.00 | 0.00 |
| ATOM | 2017 | 1HD2 | ASN | 128 | 13.294 | 53.713 | 17.389 | 0.00 | 0.00 |
| ATOM | 2018 | 2HD2 | ASN | 128 | 13.481 | 55.183 | 16.563 | 0.00 | 0.00 |
| ATOM | 2019 | C    | ASN | 128 | 18.180 | 54.065 | 16.188 | 0.00 | 0.00 |
| ATOM | 2020 | O    | ASN | 128 | 18.376 | 52.873 | 15.991 | 0.00 | 0.00 |
| ATOM | 2021 | N    | TRP | 129 | 18.865 | 54.742 | 17.106 | 0.00 | 0.00 |
| ATOM | 2022 | H    | TRP | 129 | 18.668 | 55.711 | 17.210 | 0.00 | 0.00 |
| ATOM | 2023 | CA   | TRP | 129 | 19.966 | 54.175 | 17.884 | 0.00 | 0.00 |
| ATOM | 2024 | HA   | TRP | 129 | 20.712 | 53.825 | 17.188 | 0.00 | 0.00 |
| ATOM | 2025 | CB   | TRP | 129 | 20.589 | 55.276 | 18.737 | 0.00 | 0.00 |
| ATOM | 2026 | HB2  | TRP | 129 | 20.888 | 56.082 | 18.092 | 0.00 | 0.00 |
| ATOM | 2027 | HB3  | TRP | 129 | 19.839 | 55.662 | 19.399 | 0.00 | 0.00 |
| ATOM | 2028 | CG   | TRP | 129 | 21.785 | 54.903 | 19.548 | 0.00 | 0.00 |
| ATOM | 2029 | CD1  | TRP | 129 | 21.878 | 55.008 | 20.864 | 0.00 | 0.00 |
| ATOM | 2030 | HD1  | TRP | 129 | 21.096 | 55.342 | 21.480 | 0.00 | 0.00 |
| ATOM | 2031 | NE1  | TRP | 129 | 23.142 | 54.677 | 21.280 | 0.00 | 0.00 |
| ATOM | 2032 | HE1  | TRP | 129 | 23.458 | 54.745 | 22.213 | 0.00 | 0.00 |
| ATOM | 2033 | CE2  | TRP | 129 | 23.922 | 54.313 | 20.252 | 0.00 | 0.00 |
| ATOM | 2034 | CZ2  | TRP | 129 | 25.244 | 53.921 | 20.182 | 0.00 | 0.00 |
| ATOM | 2035 | HZ2  | TRP | 129 | 25.842 | 53.865 | 21.056 | 0.00 | 0.00 |
| ATOM | 2036 | CH2  | TRP | 129 | 25.773 | 53.630 | 18.950 | 0.00 | 0.00 |
| ATOM | 2037 | HH2  | TRP | 129 | 26.787 | 53.332 | 18.874 | 0.00 | 0.00 |
| ATOM | 2038 | CZ3  | TRP | 129 | 24.975 | 53.717 | 17.819 | 0.00 | 0.00 |
| ATOM | 2039 | HZ3  | TRP | 129 | 25.386 | 53.478 | 16.886 | 0.00 | 0.00 |
| ATOM | 2040 | CE3  | TRP | 129 | 23.646 | 54.111 | 17.910 | 0.00 | 0.00 |
| ATOM | 2041 | HE3  | TRP | 129 | 23.050 | 54.191 | 17.037 | 0.00 | 0.00 |
| ATOM | 2042 | CD2  | TRP | 129 | 23.080 | 54.430 | 19.128 | 0.00 | 0.00 |
| ATOM | 2043 | C    | TRP | 129 | 19.559 | 52.969 | 18.730 | 0.00 | 0.00 |
| ATOM | 2044 | O    | TRP | 129 | 20.276 | 51.983 | 18.759 | 0.00 | 0.00 |
| ATOM | 2045 | N    | GLY | 130 | 18.390 | 52.988 | 19.354 | 0.00 | 0.00 |
| ATOM | 2046 | H    | GLY | 130 | 17.828 | 53.805 | 19.285 | 0.00 | 0.00 |
| ATOM | 2047 | CA   | GLY | 130 | 17.903 | 51.872 | 20.160 | 0.00 | 0.00 |
| ATOM | 2048 | HA2  | GLY | 130 | 18.620 | 51.674 | 20.935 | 0.00 | 0.00 |
| ATOM | 2049 | HA3  | GLY | 130 | 16.970 | 52.135 | 20.621 | 0.00 | 0.00 |
| ATOM | 2050 | C    | GLY | 130 | 17.688 | 50.588 | 19.367 | 0.00 | 0.00 |
| ATOM | 2051 | O    | GLY | 130 | 18.060 | 49.525 | 19.834 | 0.00 | 0.00 |
| ATOM | 2052 | N    | ARG | 131 | 17.197 | 50.671 | 18.133 | 0.00 | 0.00 |
| ATOM | 2053 | H    | ARG | 131 | 16.906 | 51.572 | 17.824 | 0.00 | 0.00 |
| ATOM | 2054 | CA   | ARG | 131 | 17.096 | 49.532 | 17.202 | 0.00 | 0.00 |
| ATOM | 2055 | HA   | ARG | 131 | 16.589 | 48.717 | 17.699 | 0.00 | 0.00 |
| ATOM | 2056 | CB   | ARG | 131 | 16.281 | 49.929 | 15.966 | 0.00 | 0.00 |
| ATOM | 2057 | HB2  | ARG | 131 | 16.746 | 50.790 | 15.514 | 0.00 | 0.00 |
| ATOM | 2058 | HB3  | ARG | 131 | 16.316 | 49.125 | 15.251 | 0.00 | 0.00 |
| ATOM | 2059 | CG   | ARG | 131 | 14.803 | 50.233 | 16.233 | 0.00 | 0.00 |
| ATOM | 2060 | HG2  | ARG | 131 | 14.269 | 49.320 | 16.417 | 0.00 | 0.00 |
| ATOM | 2061 | HG3  | ARG | 131 | 14.702 | 50.859 | 17.102 | 0.00 | 0.00 |
| ATOM | 2062 | CD   | ARG | 131 | 14.201 | 50.950 | 15.031 | 0.00 | 0.00 |
| ATOM | 2063 | HD2  | ARG | 131 | 14.791 | 51.823 | 14.831 | 0.00 | 0.00 |
| ATOM | 2064 | HD3  | ARG | 131 | 14.258 | 50.312 | 14.170 | 0.00 | 0.00 |
| ATOM | 2065 | NE   | ARG | 131 | 12.829 | 51.394 | 15.251 | 0.00 | 0.00 |
| ATOM | 2066 | HE   | ARG | 131 | 12.695 | 52.273 | 15.629 | 0.00 | 0.00 |
| ATOM | 2067 | CZ   | ARG | 131 | 11.739 | 50.812 | 14.907 | 0.00 | 0.00 |
| ATOM | 2068 | NH1  | ARG | 131 | 11.718 | 49.651 | 14.408 | 0.00 | 0.00 |
| ATOM | 2069 | 1HH1 | ARG | 131 | 12.562 | 49.158 | 14.282 | 0.00 | 0.00 |
| ATOM | 2070 | 2HH1 | ARG | 131 | 10.865 | 49.248 | 14.122 | 0.00 | 0.00 |
| ATOM | 2071 | NH2  | ARG | 131 | 10.616 | 51.395 | 15.060 | 0.00 | 0.00 |
| ATOM | 2072 | 1HH2 | ARG | 131 | 10.592 | 52.287 | 15.437 | 0.00 | 0.00 |
| ATOM | 2073 | 2HH2 | ARG | 131 | 9.797  | 50.953 | 14.834 | 0.00 | 0.00 |
| ATOM | 2074 | C    | ARG | 131 | 18.472 | 48.993 | 16.802 | 0.00 | 0.00 |
| ATOM | 2075 | O    | ARG | 131 | 18.642 | 47.790 | 16.707 | 0.00 | 0.00 |
| ATOM | 2076 | N    | VAL | 132 | 19.474 | 49.853 | 16.635 | 0.00 | 0.00 |
| ATOM | 2077 | H    | VAL | 132 | 19.273 | 50.822 | 16.731 | 0.00 | 0.00 |
| ATOM | 2078 | CA   | VAL | 132 | 20.857 | 49.439 | 16.334 | 0.00 | 0.00 |
| ATOM | 2079 | HA   | VAL | 132 | 20.827 | 48.694 | 15.553 | 0.00 | 0.00 |
| ATOM | 2080 | CB   | VAL | 132 | 21.690 | 50.610 | 15.800 | 0.00 | 0.00 |
| ATOM | 2081 | HB   | VAL | 132 | 21.690 | 51.405 | 16.512 | 0.00 | 0.00 |
| ATOM | 2082 | CG1  | VAL | 132 | 23.125 | 50.238 | 15.518 | 0.00 | 0.00 |
| ATOM | 2083 | 1HG1 | VAL | 132 | 23.517 | 50.326 | 15.406 | 0.00 | 0.00 |
| ATOM | 2084 | 2HG1 | VAL | 132 | 23.471 | 50.103 | 15.635 | 0.00 | 0.00 |
| ATOM | 2085 | 3HG1 | VAL | 132 | 23.442 | 50.018 | 15.320 | 0.00 | 0.00 |
| ATOM | 2086 | CG2  | VAL | 132 | 21.114 | 51.146 | 14.504 | 0.00 | 0.00 |
| ATOM | 2087 | 1HG2 | VAL | 132 | 21.005 | 51.249 | 14.155 | 0.00 | 0.00 |
| ATOM | 2088 | 2HG2 | VAL | 132 | 20.929 | 51.274 | 14.205 | 0.00 | 0.00 |
| ATOM | 2089 | 3HG2 | VAL | 132 | 20.994 | 51.328 | 14.203 | 0.00 | 0.00 |
| ATOM | 2090 | C    | VAL | 132 | 21.525 | 48.771 | 17.536 | 0.00 | 0.00 |
| ATOM | 2091 | O    | VAL | 132 | 22.143 | 47.731 | 17.369 | 0.00 | 0.00 |
| ATOM | 2092 | N    | VAL | 133 | 21.349 | 49.283 | 18.751 | 0.00 | 0.00 |
| ATOM | 2093 | H    | VAL | 133 | 20.864 | 50.152 | 18.824 | 0.00 | 0.00 |
| ATOM | 2094 | CA   | VAL | 133 | 21.861 | 48.653 | 19.983 | 0.00 | 0.00 |
| ATOM | 2095 | HA   | VAL | 133 | 22.901 | 48.411 | 19.827 | 0.00 | 0.00 |
| ATOM | 2096 | CB   | VAL | 133 | 21.796 | 49.617 | 21.175 | 0.00 | 0.00 |
| ATOM | 2097 | HB   | VAL | 133 | 20.790 | 49.961 | 21.286 | 0.00 | 0.00 |
| ATOM | 2098 | CG1  | VAL | 133 | 22.219 | 48.963 | 22.472 | 0.00 | 0.00 |
| ATOM | 2099 | 1HG1 | VAL | 133 | 22.272 | 48.943 | 22.872 | 0.00 | 0.00 |

|      |      |      |     |     |        |        |        |      |      |
|------|------|------|-----|-----|--------|--------|--------|------|------|
| ATOM | 2100 | ZHG1 | VAL | 133 | 22.210 | 48.689 | 22.774 | 0.00 | 0.00 |
| ATOM | 2101 | 3HG1 | VAL | 133 | 22.470 | 48.795 | 22.749 | 0.00 | 0.00 |
| ATOM | 2102 | CG2  | VAL | 133 | 22.698 | 50.815 | 20.957 | 0.00 | 0.00 |
| ATOM | 2103 | 1HG2 | VAL | 133 | 22.905 | 51.123 | 20.834 | 0.00 | 0.00 |
| ATOM | 2104 | 2HG2 | VAL | 133 | 22.871 | 51.157 | 20.950 | 0.00 | 0.00 |
| ATOM | 2105 | 3HG2 | VAL | 133 | 22.970 | 51.082 | 20.927 | 0.00 | 0.00 |
| ATOM | 2106 | C    | VAL | 133 | 21.152 | 47.326 | 20.266 | 0.00 | 0.00 |
| ATOM | 2107 | O    | VAL | 133 | 21.803 | 46.375 | 20.668 | 0.00 | 0.00 |
| ATOM | 2108 | N    | ALA | 134 | 19.862 | 47.200 | 19.967 | 0.00 | 0.00 |
| ATOM | 2109 | H    | ALA | 134 | 19.353 | 48.015 | 19.703 | 0.00 | 0.00 |
| ATOM | 2110 | CA   | ALA | 134 | 19.147 | 45.932 | 20.049 | 0.00 | 0.00 |
| ATOM | 2111 | HA   | ALA | 134 | 19.307 | 45.510 | 21.031 | 0.00 | 0.00 |
| ATOM | 2112 | CB   | ALA | 134 | 17.660 | 46.201 | 19.892 | 0.00 | 0.00 |
| ATOM | 2113 | HB1  | ALA | 134 | 17.274 | 46.393 | 20.312 | 0.00 | 0.00 |
| ATOM | 2114 | HB2  | ALA | 134 | 17.381 | 46.580 | 19.518 | 0.00 | 0.00 |
| ATOM | 2115 | HB3  | ALA | 134 | 17.239 | 45.808 | 19.742 | 0.00 | 0.00 |
| ATOM | 2116 | C    | ALA | 134 | 19.669 | 44.892 | 19.043 | 0.00 | 0.00 |
| ATOM | 2117 | O    | ALA | 134 | 19.799 | 43.734 | 19.403 | 0.00 | 0.00 |
| ATOM | 2118 | N    | LEU | 135 | 20.043 | 45.288 | 17.824 | 0.00 | 0.00 |
| ATOM | 2119 | H    | LEU | 135 | 19.890 | 46.236 | 17.572 | 0.00 | 0.00 |
| ATOM | 2120 | CA   | LEU | 135 | 20.688 | 44.401 | 16.851 | 0.00 | 0.00 |
| ATOM | 2121 | HA   | LEU | 135 | 20.059 | 43.529 | 16.733 | 0.00 | 0.00 |
| ATOM | 2122 | CB   | LEU | 135 | 20.800 | 45.105 | 15.491 | 0.00 | 0.00 |
| ATOM | 2123 | HB2  | LEU | 135 | 19.821 | 45.388 | 15.158 | 0.00 | 0.00 |
| ATOM | 2124 | HB3  | LEU | 135 | 21.365 | 46.005 | 15.621 | 0.00 | 0.00 |
| ATOM | 2125 | CG   | LEU | 135 | 21.468 | 44.287 | 14.385 | 0.00 | 0.00 |
| ATOM | 2126 | HG   | LEU | 135 | 22.441 | 43.991 | 14.699 | 0.00 | 0.00 |
| ATOM | 2127 | CD1  | LEU | 135 | 20.685 | 43.066 | 14.012 | 0.00 | 0.00 |
| ATOM | 2128 | 1HD1 | LEU | 135 | 20.521 | 42.682 | 14.033 | 0.00 | 0.00 |
| ATOM | 2129 | 2HD1 | LEU | 135 | 20.406 | 42.868 | 13.915 | 0.00 | 0.00 |
| ATOM | 2130 | 3HD1 | LEU | 135 | 20.581 | 42.746 | 13.801 | 0.00 | 0.00 |
| ATOM | 2131 | CD2  | LEU | 135 | 21.643 | 45.120 | 13.143 | 0.00 | 0.00 |
| ATOM | 2132 | 1HD2 | LEU | 135 | 22.036 | 44.974 | 12.650 | 0.00 | 0.00 |
| ATOM | 2133 | 2HD2 | LEU | 135 | 21.183 | 45.263 | 12.755 | 0.00 | 0.00 |
| ATOM | 2134 | 3HD2 | LEU | 135 | 21.863 | 45.724 | 13.123 | 0.00 | 0.00 |
| ATOM | 2135 | C    | LEU | 135 | 22.056 | 43.907 | 17.338 | 0.00 | 0.00 |
| ATOM | 2136 | O    | LEU | 135 | 22.370 | 42.738 | 17.198 | 0.00 | 0.00 |
| ATOM | 2137 | N    | LEU | 136 | 22.856 | 44.773 | 17.950 | 0.00 | 0.00 |
| ATOM | 2138 | H    | LEU | 136 | 22.558 | 45.722 | 18.017 | 0.00 | 0.00 |
| ATOM | 2139 | CA   | LEU | 136 | 24.139 | 44.394 | 18.545 | 0.00 | 0.00 |
| ATOM | 2140 | HA   | LEU | 136 | 24.711 | 43.867 | 17.801 | 0.00 | 0.00 |
| ATOM | 2141 | CB   | LEU | 136 | 24.906 | 45.638 | 18.964 | 0.00 | 0.00 |
| ATOM | 2142 | HB2  | LEU | 136 | 24.292 | 46.224 | 19.590 | 0.00 | 0.00 |
| ATOM | 2143 | HB3  | LEU | 136 | 25.743 | 45.331 | 19.535 | 0.00 | 0.00 |
| ATOM | 2144 | CG   | LEU | 136 | 25.408 | 46.520 | 17.849 | 0.00 | 0.00 |
| ATOM | 2145 | HG   | LEU | 136 | 24.657 | 46.788 | 17.276 | 0.00 | 0.00 |
| ATOM | 2146 | CD1  | LEU | 136 | 26.004 | 47.707 | 18.323 | 0.00 | 0.00 |
| ATOM | 2147 | 1HD1 | LEU | 136 | 26.023 | 48.128 | 18.202 | 0.00 | 0.00 |
| ATOM | 2148 | 2HD1 | LEU | 136 | 26.386 | 47.889 | 18.412 | 0.00 | 0.00 |
| ATOM | 2149 | 3HD1 | LEU | 136 | 26.016 | 47.981 | 18.700 | 0.00 | 0.00 |
| ATOM | 2150 | CD2  | LEU | 136 | 26.366 | 45.918 | 17.018 | 0.00 | 0.00 |
| ATOM | 2151 | 1HD2 | LEU | 136 | 26.726 | 45.700 | 17.131 | 0.00 | 0.00 |
| ATOM | 2152 | 2HD2 | LEU | 136 | 26.359 | 45.570 | 16.672 | 0.00 | 0.00 |
| ATOM | 2153 | 3HD2 | LEU | 136 | 26.685 | 46.055 | 16.631 | 0.00 | 0.00 |
| ATOM | 2154 | C    | LEU | 136 | 23.959 | 43.427 | 19.714 | 0.00 | 0.00 |
| ATOM | 2155 | O    | LEU | 136 | 24.664 | 42.433 | 19.796 | 0.00 | 0.00 |
| ATOM | 2156 | N    | GLY | 137 | 22.974 | 43.663 | 20.578 | 0.00 | 0.00 |
| ATOM | 2157 | H    | GLY | 137 | 22.465 | 44.511 | 20.464 | 0.00 | 0.00 |
| ATOM | 2158 | CA   | GLY | 137 | 22.616 | 42.778 | 21.678 | 0.00 | 0.00 |
| ATOM | 2159 | HA2  | GLY | 137 | 23.466 | 42.652 | 22.324 | 0.00 | 0.00 |
| ATOM | 2160 | HA3  | GLY | 137 | 21.829 | 43.244 | 22.241 | 0.00 | 0.00 |
| ATOM | 2161 | C    | GLY | 137 | 22.115 | 41.405 | 21.244 | 0.00 | 0.00 |
| ATOM | 2162 | O    | GLY | 137 | 22.514 | 40.404 | 21.819 | 0.00 | 0.00 |
| ATOM | 2163 | N    | PHE | 138 | 21.305 | 41.346 | 20.194 | 0.00 | 0.00 |
| ATOM | 2164 | H    | PHE | 138 | 20.967 | 42.201 | 19.809 | 0.00 | 0.00 |
| ATOM | 2165 | CA   | PHE | 138 | 20.877 | 40.103 | 19.561 | 0.00 | 0.00 |
| ATOM | 2166 | HA   | PHE | 138 | 20.486 | 39.453 | 20.331 | 0.00 | 0.00 |
| ATOM | 2167 | CB   | PHE | 138 | 19.758 | 40.411 | 18.560 | 0.00 | 0.00 |
| ATOM | 2168 | HB2  | PHE | 138 | 19.029 | 41.024 | 19.048 | 0.00 | 0.00 |
| ATOM | 2169 | HB3  | PHE | 138 | 20.174 | 40.993 | 17.765 | 0.00 | 0.00 |
| ATOM | 2170 | CG   | PHE | 138 | 19.005 | 39.259 | 17.950 | 0.00 | 0.00 |
| ATOM | 2171 | CD1  | PHE | 138 | 18.664 | 38.944 | 17.348 | 0.00 | 0.00 |
| ATOM | 2172 | HD1  | PHE | 138 | 18.951 | 39.486 | 17.324 | 0.00 | 0.00 |
| ATOM | 2173 | CE1  | PHE | 138 | 17.943 | 37.911 | 16.767 | 0.00 | 0.00 |
| ATOM | 2174 | HE1  | PHE | 138 | 17.684 | 37.680 | 16.312 | 0.00 | 0.00 |
| ATOM | 2175 | CZ   | PHE | 138 | 17.557 | 37.187 | 16.779 | 0.00 | 0.00 |
| ATOM | 2176 | HZ   | PHE | 138 | 17.015 | 36.388 | 16.339 | 0.00 | 0.00 |
| ATOM | 2177 | CE2  | PHE | 138 | 17.870 | 37.500 | 17.387 | 0.00 | 0.00 |
| ATOM | 2178 | HE2  | PHE | 138 | 17.564 | 36.956 | 17.405 | 0.00 | 0.00 |
| ATOM | 2179 | CD2  | PHE | 138 | 18.594 | 38.530 | 17.971 | 0.00 | 0.00 |
| ATOM | 2180 | HD2  | PHE | 138 | 18.818 | 38.750 | 18.437 | 0.00 | 0.00 |
| ATOM | 2181 | C    | PHE | 138 | 22.057 | 39.382 | 18.900 | 0.00 | 0.00 |
| ATOM | 2182 | O    | PHE | 138 | 22.203 | 38.181 | 19.036 | 0.00 | 0.00 |
| ATOM | 2183 | N    | GLY | 139 | 22.964 | 40.123 | 18.270 | 0.00 | 0.00 |
| ATOM | 2184 | H    | GLY | 139 | 22.775 | 41.094 | 18.162 | 0.00 | 0.00 |
| ATOM | 2185 | CA   | GLY | 139 | 24.217 | 39.624 | 17.713 | 0.00 | 0.00 |
| ATOM | 2186 | HA2  | GLY | 139 | 24.004 | 38.874 | 16.975 | 0.00 | 0.00 |
| ATOM | 2187 | HA3  | GLY | 139 | 24.714 | 40.443 | 17.227 | 0.00 | 0.00 |
| ATOM | 2188 | C    | GLY | 139 | 25.175 | 39.046 | 18.750 | 0.00 | 0.00 |
| ATOM | 2189 | O    | GLY | 139 | 25.743 | 37.991 | 18.517 | 0.00 | 0.00 |
| ATOM | 2190 | N    | TYR | 140 | 25.298 | 39.660 | 19.925 | 0.00 | 0.00 |
| ATOM | 2191 | H    | TYR | 140 | 24.842 | 40.538 | 20.050 | 0.00 | 0.00 |
| ATOM | 2192 | CA   | TYR | 140 | 26.057 | 39.102 | 21.048 | 0.00 | 0.00 |
| ATOM | 2193 | HA   | TYR | 140 | 27.049 | 38.845 | 20.701 | 0.00 | 0.00 |
| ATOM | 2194 | CB   | TYR | 140 | 26.218 | 40.119 | 22.179 | 0.00 | 0.00 |
| ATOM | 2195 | HB2  | TYR | 140 | 26.767 | 40.963 | 21.806 | 0.00 | 0.00 |
| ATOM | 2196 | HB3  | TYR | 140 | 25.249 | 40.467 | 22.487 | 0.00 | 0.00 |
| ATOM | 2197 | CG   | TYR | 140 | 26.939 | 39.568 | 23.389 | 0.00 | 0.00 |
| ATOM | 2198 | CD1  | TYR | 140 | 28.315 | 39.388 | 23.340 | 0.00 | 0.00 |
| ATOM | 2199 | HD1  | TYR | 140 | 28.846 | 39.682 | 22.471 | 0.00 | 0.00 |
| ATOM | 2200 | CE1  | TYR | 140 | 28.993 | 38.809 | 24.412 | 0.00 | 0.00 |
| ATOM | 2201 | HE1  | TYR | 140 | 30.043 | 38.665 | 24.380 | 0.00 | 0.00 |
| ATOM | 2202 | CZ   | TYR | 140 | 28.297 | 38.409 | 25.551 | 0.00 | 0.00 |
| ATOM | 2203 | OH   | TYR | 140 | 28.960 | 37.861 | 26.583 | 0.00 | 0.00 |
| ATOM | 2204 | HH   | TYR | 140 | 28.396 | 37.643 | 27.300 | 0.00 | 0.00 |

|      |      |      |     |     |        |        |        |      |      |
|------|------|------|-----|-----|--------|--------|--------|------|------|
| ATOM | 2205 | CE2  | TYR | 140 | 26.915 | 38.593 | 25.606 | 0.00 | 0.00 |
| ATOM | 2206 | HE2  | TYR | 140 | 26.377 | 38.288 | 26.469 | 0.00 | 0.00 |
| ATOM | 2207 | CD2  | TYR | 140 | 26.240 | 39.173 | 24.527 | 0.00 | 0.00 |
| ATOM | 2208 | HD2  | TYR | 140 | 25.189 | 39.302 | 24.572 | 0.00 | 0.00 |
| ATOM | 2209 | C    | TYR | 140 | 25.425 | 37.814 | 21.574 | 0.00 | 0.00 |
| ATOM | 2210 | O    | TYR | 140 | 26.126 | 36.832 | 21.766 | 0.00 | 0.00 |
| ATOM | 2211 | N    | ARG | 141 | 24.103 | 37.780 | 21.745 | 0.00 | 0.00 |
| ATOM | 2212 | H    | ARG | 141 | 23.583 | 38.616 | 21.582 | 0.00 | 0.00 |
| ATOM | 2213 | CA   | ARG | 141 | 23.391 | 36.573 | 22.185 | 0.00 | 0.00 |
| ATOM | 2214 | HA   | ARG | 141 | 23.902 | 36.207 | 23.066 | 0.00 | 0.00 |
| ATOM | 2215 | CB   | ARG | 141 | 21.957 | 36.949 | 22.589 | 0.00 | 0.00 |
| ATOM | 2216 | HB2  | ARG | 141 | 21.999 | 37.741 | 23.317 | 0.00 | 0.00 |
| ATOM | 2217 | HB3  | ARG | 141 | 21.441 | 37.331 | 21.729 | 0.00 | 0.00 |
| ATOM | 2218 | CG   | ARG | 141 | 21.120 | 35.811 | 23.176 | 0.00 | 0.00 |
| ATOM | 2219 | HG2  | ARG | 141 | 20.185 | 36.213 | 23.527 | 0.00 | 0.00 |
| ATOM | 2220 | HG3  | ARG | 141 | 20.892 | 35.110 | 22.399 | 0.00 | 0.00 |
| ATOM | 2221 | CD   | ARG | 141 | 21.758 | 35.043 | 24.326 | 0.00 | 0.00 |
| ATOM | 2222 | HD2  | ARG | 141 | 21.116 | 34.220 | 24.556 | 0.00 | 0.00 |
| ATOM | 2223 | HD3  | ARG | 141 | 22.700 | 34.633 | 24.020 | 0.00 | 0.00 |
| ATOM | 2224 | NE   | ARG | 141 | 21.940 | 35.847 | 25.519 | 0.00 | 0.00 |
| ATOM | 2225 | HE   | ARG | 141 | 21.578 | 36.770 | 25.543 | 0.00 | 0.00 |
| ATOM | 2226 | CZ   | ARG | 141 | 22.523 | 35.468 | 26.602 | 0.00 | 0.00 |
| ATOM | 2227 | NH1  | ARG | 141 | 23.035 | 34.310 | 26.744 | 0.00 | 0.00 |
| ATOM | 2228 | 1HH1 | ARG | 141 | 22.978 | 33.640 | 26.036 | 0.00 | 0.00 |
| ATOM | 2229 | 2HH1 | ARG | 141 | 23.434 | 34.064 | 27.601 | 0.00 | 0.00 |
| ATOM | 2230 | NH2  | ARG | 141 | 22.600 | 36.256 | 27.591 | 0.00 | 0.00 |
| ATOM | 2231 | 1HH2 | ARG | 141 | 22.070 | 37.085 | 27.580 | 0.00 | 0.00 |
| ATOM | 2232 | 2HH2 | ARG | 141 | 23.020 | 35.956 | 28.415 | 0.00 | 0.00 |
| ATOM | 2233 | C    | ARG | 141 | 23.480 | 35.437 | 21.162 | 0.00 | 0.00 |
| ATOM | 2234 | O    | ARG | 141 | 23.642 | 34.300 | 21.558 | 0.00 | 0.00 |
| ATOM | 2235 | N    | LEU | 142 | 23.479 | 35.736 | 19.867 | 0.00 | 0.00 |
| ATOM | 2236 | H    | LEU | 142 | 23.276 | 36.678 | 19.616 | 0.00 | 0.00 |
| ATOM | 2237 | CA   | LEU | 142 | 23.743 | 34.780 | 18.792 | 0.00 | 0.00 |
| ATOM | 2238 | HA   | LEU | 142 | 23.081 | 33.934 | 18.926 | 0.00 | 0.00 |
| ATOM | 2239 | CB   | LEU | 142 | 23.410 | 35.442 | 17.446 | 0.00 | 0.00 |
| ATOM | 2240 | HB2  | LEU | 142 | 22.380 | 35.736 | 17.451 | 0.00 | 0.00 |
| ATOM | 2241 | HB3  | LEU | 142 | 23.991 | 36.337 | 17.358 | 0.00 | 0.00 |
| ATOM | 2242 | CG   | LEU | 142 | 23.660 | 34.604 | 16.195 | 0.00 | 0.00 |
| ATOM | 2243 | HG   | LEU | 142 | 24.678 | 34.306 | 16.159 | 0.00 | 0.00 |
| ATOM | 2244 | CD1  | LEU | 142 | 22.809 | 33.380 | 16.146 | 0.00 | 0.00 |
| ATOM | 2245 | 1HD1 | LEU | 142 | 22.784 | 32.963 | 16.103 | 0.00 | 0.00 |
| ATOM | 2246 | 2HD1 | LEU | 142 | 22.546 | 33.130 | 16.319 | 0.00 | 0.00 |
| ATOM | 2247 | 3HD1 | LEU | 142 | 22.507 | 33.153 | 15.962 | 0.00 | 0.00 |
| ATOM | 2248 | CD2  | LEU | 142 | 23.384 | 35.420 | 14.957 | 0.00 | 0.00 |
| ATOM | 2249 | 1HD2 | LEU | 142 | 23.670 | 35.724 | 14.641 | 0.00 | 0.00 |
| ATOM | 2250 | 2HD2 | LEU | 142 | 23.217 | 35.314 | 14.477 | 0.00 | 0.00 |
| ATOM | 2251 | 3HD2 | LEU | 142 | 23.076 | 35.813 | 14.850 | 0.00 | 0.00 |
| ATOM | 2252 | C    | LEU | 142 | 25.178 | 34.234 | 18.846 | 0.00 | 0.00 |
| ATOM | 2253 | O    | LEU | 142 | 25.362 | 33.028 | 18.807 | 0.00 | 0.00 |
| ATOM | 2254 | N    | ALA | 143 | 26.180 | 35.094 | 19.006 | 0.00 | 0.00 |
| ATOM | 2255 | H    | ALA | 143 | 25.965 | 36.067 | 19.015 | 0.00 | 0.00 |
| ATOM | 2256 | CA   | ALA | 143 | 27.577 | 34.708 | 19.157 | 0.00 | 0.00 |
| ATOM | 2257 | HA   | ALA | 143 | 27.865 | 34.125 | 18.293 | 0.00 | 0.00 |
| ATOM | 2258 | CB   | ALA | 143 | 28.435 | 35.971 | 19.182 | 0.00 | 0.00 |
| ATOM | 2259 | HB1  | ALA | 143 | 28.555 | 36.346 | 19.012 | 0.00 | 0.00 |
| ATOM | 2260 | HB2  | ALA | 143 | 28.574 | 36.343 | 19.382 | 0.00 | 0.00 |
| ATOM | 2261 | HB3  | ALA | 143 | 28.818 | 36.146 | 19.178 | 0.00 | 0.00 |
| ATOM | 2262 | C    | ALA | 143 | 27.802 | 33.824 | 20.389 | 0.00 | 0.00 |
| ATOM | 2263 | O    | ALA | 143 | 28.440 | 32.788 | 20.303 | 0.00 | 0.00 |
| ATOM | 2264 | N    | LEU | 144 | 27.216 | 34.180 | 21.526 | 0.00 | 0.00 |
| ATOM | 2265 | H    | LEU | 144 | 26.747 | 35.059 | 21.552 | 0.00 | 0.00 |
| ATOM | 2266 | CA   | LEU | 144 | 27.294 | 33.398 | 22.751 | 0.00 | 0.00 |
| ATOM | 2267 | HA   | LEU | 144 | 28.335 | 33.158 | 22.911 | 0.00 | 0.00 |
| ATOM | 2268 | CB   | LEU | 144 | 26.814 | 34.265 | 23.915 | 0.00 | 0.00 |
| ATOM | 2269 | HB2  | LEU | 144 | 27.251 | 35.211 | 23.854 | 0.00 | 0.00 |
| ATOM | 2270 | HB3  | LEU | 144 | 25.787 | 34.401 | 23.838 | 0.00 | 0.00 |
| ATOM | 2271 | CG   | LEU | 144 | 27.101 | 33.729 | 25.273 | 0.00 | 0.00 |
| ATOM | 2272 | HG   | LEU | 144 | 26.656 | 32.807 | 25.347 | 0.00 | 0.00 |
| ATOM | 2273 | CD1  | LEU | 144 | 28.516 | 33.573 | 25.533 | 0.00 | 0.00 |
| ATOM | 2274 | 1HD1 | LEU | 144 | 28.854 | 33.603 | 25.709 | 0.00 | 0.00 |
| ATOM | 2275 | 2HD1 | LEU | 144 | 28.856 | 33.401 | 25.606 | 0.00 | 0.00 |
| ATOM | 2276 | 3HD1 | LEU | 144 | 28.866 | 33.579 | 25.485 | 0.00 | 0.00 |
| ATOM | 2277 | CD2  | LEU | 144 | 26.556 | 34.624 | 26.339 | 0.00 | 0.00 |
| ATOM | 2278 | 1HD2 | LEU | 144 | 26.571 | 34.743 | 26.785 | 0.00 | 0.00 |
| ATOM | 2279 | 2HD2 | LEU | 144 | 26.193 | 34.738 | 26.551 | 0.00 | 0.00 |
| ATOM | 2280 | 3HD2 | LEU | 144 | 26.503 | 35.035 | 26.453 | 0.00 | 0.00 |
| ATOM | 2281 | C    | LEU | 144 | 26.543 | 32.065 | 22.645 | 0.00 | 0.00 |
| ATOM | 2282 | O    | LEU | 144 | 27.033 | 31.055 | 23.129 | 0.00 | 0.00 |
| ATOM | 2283 | N    | HIP | 145 | 25.414 | 32.015 | 21.937 | 0.00 | 0.00 |
| ATOM | 2284 | H    | HIP | 145 | 25.043 | 32.877 | 21.596 | 0.00 | 0.00 |
| ATOM | 2285 | CA   | HIP | 145 | 24.651 | 30.786 | 21.704 | 0.00 | 0.00 |
| ATOM | 2286 | HA   | HIP | 145 | 24.408 | 30.355 | 22.664 | 0.00 | 0.00 |
| ATOM | 2287 | CB   | HIP | 145 | 23.340 | 31.130 | 20.990 | 0.00 | 0.00 |
| ATOM | 2288 | HB2  | HIP | 145 | 22.820 | 31.857 | 21.575 | 0.00 | 0.00 |
| ATOM | 2289 | HB3  | HIP | 145 | 23.551 | 31.578 | 20.046 | 0.00 | 0.00 |
| ATOM | 2290 | CG   | HIP | 145 | 22.417 | 29.987 | 20.773 | 0.00 | 0.00 |
| ATOM | 2291 | ND1  | HIP | 145 | 21.452 | 29.575 | 21.613 | 0.00 | 0.00 |
| ATOM | 2292 | HD1  | HIP | 145 | 21.264 | 29.963 | 22.480 | 0.00 | 0.00 |
| ATOM | 2293 | CE1  | HIP | 145 | 20.830 | 28.548 | 21.073 | 0.00 | 0.00 |
| ATOM | 2294 | HE1  | HIP | 145 | 20.034 | 28.018 | 21.500 | 0.00 | 0.00 |
| ATOM | 2295 | NE2  | HIP | 145 | 21.377 | 28.291 | 19.922 | 0.00 | 0.00 |
| ATOM | 2296 | HE2  | HIP | 145 | 21.128 | 27.544 | 19.339 | 0.00 | 0.00 |
| ATOM | 2297 | CD2  | HIP | 145 | 22.367 | 29.192 | 19.709 | 0.00 | 0.00 |
| ATOM | 2298 | HD2  | HIP | 145 | 22.987 | 29.248 | 18.871 | 0.00 | 0.00 |
| ATOM | 2299 | C    | HIP | 145 | 25.457 | 29.730 | 20.948 | 0.00 | 0.00 |
| ATOM | 2300 | O    | HIP | 145 | 25.418 | 28.569 | 21.321 | 0.00 | 0.00 |
| ATOM | 2301 | N    | VAL | 146 | 26.229 | 30.111 | 19.932 | 0.00 | 0.00 |
| ATOM | 2302 | H    | VAL | 146 | 26.223 | 31.070 | 19.668 | 0.00 | 0.00 |
| ATOM | 2303 | CA   | VAL | 146 | 27.105 | 29.165 | 19.213 | 0.00 | 0.00 |
| ATOM | 2304 | HA   | VAL | 146 | 26.563 | 28.236 | 19.105 | 0.00 | 0.00 |
| ATOM | 2305 | CB   | VAL | 146 | 27.426 | 29.607 | 17.777 | 0.00 | 0.00 |
| ATOM | 2306 | HB   | VAL | 146 | 27.962 | 28.806 | 17.308 | 0.00 | 0.00 |
| ATOM | 2307 | CG1  | VAL | 146 | 26.174 | 29.816 | 16.954 | 0.00 | 0.00 |
| ATOM | 2308 | 1HG1 | VAL | 146 | 25.632 | 29.453 | 17.035 | 0.00 | 0.00 |
| ATOM | 2309 | 2HG1 | VAL | 146 | 25.815 | 30.394 | 16.917 | 0.00 | 0.00 |

|      |      |      |     |     |        |        |        |      |      |
|------|------|------|-----|-----|--------|--------|--------|------|------|
| ATOM | 2310 | 3HG1 | VAL | 146 | 26.171 | 29.744 | 16.295 | 0.00 | 0.00 |
| ATOM | 2311 | CG2  | VAL | 146 | 28.301 | 30.836 | 17.648 | 0.00 | 0.00 |
| ATOM | 2312 | 1HG2 | VAL | 146 | 28.324 | 31.312 | 17.970 | 0.00 | 0.00 |
| ATOM | 2313 | 2HG2 | VAL | 146 | 28.895 | 30.880 | 17.647 | 0.00 | 0.00 |
| ATOM | 2314 | 3HG2 | VAL | 146 | 28.347 | 31.200 | 17.204 | 0.00 | 0.00 |
| ATOM | 2315 | C    | VAL | 146 | 28.353 | 28.812 | 20.025 | 0.00 | 0.00 |
| ATOM | 2316 | O    | VAL | 146 | 28.732 | 27.655 | 20.080 | 0.00 | 0.00 |
| ATOM | 2317 | N    | TYR | 147 | 28.920 | 29.761 | 20.766 | 0.00 | 0.00 |
| ATOM | 2318 | H    | TYR | 147 | 28.570 | 30.689 | 20.679 | 0.00 | 0.00 |
| ATOM | 2319 | CA   | TYR | 147 | 30.051 | 29.550 | 21.677 | 0.00 | 0.00 |
| ATOM | 2320 | HA   | TYR | 147 | 30.884 | 29.163 | 21.108 | 0.00 | 0.00 |
| ATOM | 2321 | CB   | TYR | 147 | 30.446 | 30.909 | 22.245 | 0.00 | 0.00 |
| ATOM | 2322 | HB2  | TYR | 147 | 30.545 | 31.599 | 21.435 | 0.00 | 0.00 |
| ATOM | 2323 | HB3  | TYR | 147 | 29.654 | 31.278 | 22.860 | 0.00 | 0.00 |
| ATOM | 2324 | CG   | TYR | 147 | 31.718 | 30.955 | 23.035 | 0.00 | 0.00 |
| ATOM | 2325 | CD1  | TYR | 147 | 31.691 | 30.823 | 24.408 | 0.00 | 0.00 |
| ATOM | 2326 | HD1  | TYR | 147 | 30.777 | 30.648 | 24.902 | 0.00 | 0.00 |
| ATOM | 2327 | CE1  | TYR | 147 | 32.862 | 30.928 | 25.146 | 0.00 | 0.00 |
| ATOM | 2328 | HE1  | TYR | 147 | 32.844 | 30.832 | 26.195 | 0.00 | 0.00 |
| ATOM | 2329 | CZ   | TYR | 147 | 34.060 | 31.175 | 24.508 | 0.00 | 0.00 |
| ATOM | 2330 | OH   | TYR | 147 | 35.182 | 31.306 | 25.206 | 0.00 | 0.00 |
| ATOM | 2331 | HH   | TYR | 147 | 35.049 | 31.237 | 26.119 | 0.00 | 0.00 |
| ATOM | 2332 | CE2  | TYR | 147 | 34.088 | 31.302 | 23.132 | 0.00 | 0.00 |
| ATOM | 2333 | HE2  | TYR | 147 | 35.003 | 31.498 | 22.653 | 0.00 | 0.00 |
| ATOM | 2334 | CD2  | TYR | 147 | 32.916 | 31.200 | 22.402 | 0.00 | 0.00 |
| ATOM | 2335 | HD2  | TYR | 147 | 32.932 | 31.322 | 21.356 | 0.00 | 0.00 |
| ATOM | 2336 | C    | TYR | 147 | 29.736 | 28.542 | 22.784 | 0.00 | 0.00 |
| ATOM | 2337 | O    | TYR | 147 | 30.528 | 27.655 | 23.054 | 0.00 | 0.00 |
| ATOM | 2338 | N    | GLN | 148 | 28.537 | 28.595 | 23.354 | 0.00 | 0.00 |
| ATOM | 2339 | H    | GLN | 148 | 27.953 | 29.366 | 23.112 | 0.00 | 0.00 |
| ATOM | 2340 | CA   | GLN | 148 | 28.017 | 27.643 | 24.337 | 0.00 | 0.00 |
| ATOM | 2341 | HA   | GLN | 148 | 28.743 | 27.533 | 25.127 | 0.00 | 0.00 |
| ATOM | 2342 | CB   | GLN | 148 | 26.733 | 28.203 | 24.942 | 0.00 | 0.00 |
| ATOM | 2343 | HB2  | GLN | 148 | 26.106 | 28.569 | 24.153 | 0.00 | 0.00 |
| ATOM | 2344 | HB3  | GLN | 148 | 26.204 | 27.425 | 25.456 | 0.00 | 0.00 |
| ATOM | 2345 | CG   | GLN | 148 | 26.974 | 29.316 | 25.943 | 0.00 | 0.00 |
| ATOM | 2346 | HG2  | GLN | 148 | 27.471 | 28.907 | 26.790 | 0.00 | 0.00 |
| ATOM | 2347 | HG3  | GLN | 148 | 27.621 | 30.050 | 25.523 | 0.00 | 0.00 |
| ATOM | 2348 | CD   | GLN | 148 | 25.715 | 30.010 | 26.394 | 0.00 | 0.00 |
| ATOM | 2349 | OE1  | GLN | 148 | 24.727 | 30.045 | 25.816 | 0.00 | 0.00 |
| ATOM | 2350 | NE2  | GLN | 148 | 25.707 | 30.602 | 27.442 | 0.00 | 0.00 |
| ATOM | 2351 | 1HE2 | GLN | 148 | 24.883 | 31.031 | 27.753 | 0.00 | 0.00 |
| ATOM | 2352 | 2HE2 | GLN | 148 | 26.499 | 30.574 | 27.943 | 0.00 | 0.00 |
| ATOM | 2353 | C    | GLN | 148 | 27.772 | 26.239 | 23.774 | 0.00 | 0.00 |
| ATOM | 2354 | O    | GLN | 148 | 27.686 | 25.305 | 24.508 | 0.00 | 0.00 |
| ATOM | 2355 | N    | HIP | 149 | 27.692 | 26.068 | 22.477 | 0.00 | 0.00 |
| ATOM | 2356 | H    | HIP | 149 | 27.759 | 26.877 | 21.940 | 0.00 | 0.00 |
| ATOM | 2357 | CA   | HIP | 149 | 27.620 | 24.779 | 21.780 | 0.00 | 0.00 |
| ATOM | 2358 | HA   | HIP | 149 | 27.351 | 24.017 | 22.491 | 0.00 | 0.00 |
| ATOM | 2359 | CB   | HIP | 149 | 26.505 | 24.822 | 20.743 | 0.00 | 0.00 |
| ATOM | 2360 | HB2  | HIP | 149 | 26.643 | 25.649 | 20.076 | 0.00 | 0.00 |
| ATOM | 2361 | HB3  | HIP | 149 | 26.551 | 23.933 | 20.154 | 0.00 | 0.00 |
| ATOM | 2362 | CG   | HIP | 149 | 25.148 | 24.895 | 21.351 | 0.00 | 0.00 |
| ATOM | 2363 | ND1  | HIP | 149 | 24.396 | 25.984 | 21.558 | 0.00 | 0.00 |
| ATOM | 2364 | HD1  | HIP | 149 | 24.660 | 26.873 | 21.324 | 0.00 | 0.00 |
| ATOM | 2365 | CE1  | HIP | 149 | 23.276 | 25.648 | 22.150 | 0.00 | 0.00 |
| ATOM | 2366 | HE1  | HIP | 149 | 22.512 | 26.288 | 22.474 | 0.00 | 0.00 |
| ATOM | 2367 | NE2  | HIP | 149 | 23.296 | 24.381 | 22.324 | 0.00 | 0.00 |
| ATOM | 2368 | HE2  | HIP | 149 | 22.593 | 23.879 | 22.750 | 0.00 | 0.00 |
| ATOM | 2369 | CD2  | HIP | 149 | 24.464 | 23.890 | 21.831 | 0.00 | 0.00 |
| ATOM | 2370 | HD2  | HIP | 149 | 24.785 | 22.911 | 21.836 | 0.00 | 0.00 |
| ATOM | 2371 | C    | HIP | 149 | 28.966 | 24.314 | 21.224 | 0.00 | 0.00 |
| ATOM | 2372 | O    | HIP | 149 | 29.012 | 23.491 | 20.355 | 0.00 | 0.00 |
| ATOM | 2373 | N    | GLY | 150 | 30.068 | 24.848 | 21.709 | 0.00 | 0.00 |
| ATOM | 2374 | H    | GLY | 150 | 29.967 | 25.515 | 22.412 | 0.00 | 0.00 |
| ATOM | 2375 | CA   | GLY | 150 | 31.424 | 24.469 | 21.337 | 0.00 | 0.00 |
| ATOM | 2376 | HA2  | GLY | 150 | 32.087 | 24.795 | 22.102 | 0.00 | 0.00 |
| ATOM | 2377 | HA3  | GLY | 150 | 31.485 | 23.408 | 21.292 | 0.00 | 0.00 |
| ATOM | 2378 | C    | GLY | 150 | 31.943 | 25.026 | 20.025 | 0.00 | 0.00 |
| ATOM | 2379 | O    | GLY | 150 | 33.039 | 24.704 | 19.638 | 0.00 | 0.00 |
| ATOM | 2380 | N    | LEU | 151 | 31.198 | 25.872 | 19.341 | 0.00 | 0.00 |
| ATOM | 2381 | H    | LEU | 151 | 30.321 | 26.127 | 19.720 | 0.00 | 0.00 |
| ATOM | 2382 | CA   | LEU | 151 | 31.560 | 26.464 | 18.059 | 0.00 | 0.00 |
| ATOM | 2383 | HA   | LEU | 151 | 32.212 | 25.781 | 17.540 | 0.00 | 0.00 |
| ATOM | 2384 | CB   | LEU | 151 | 30.303 | 26.641 | 17.196 | 0.00 | 0.00 |
| ATOM | 2385 | HB2  | LEU | 151 | 29.649 | 27.308 | 17.690 | 0.00 | 0.00 |
| ATOM | 2386 | HB3  | LEU | 151 | 30.577 | 27.107 | 16.287 | 0.00 | 0.00 |
| ATOM | 2387 | CG   | LEU | 151 | 29.538 | 25.388 | 16.854 | 0.00 | 0.00 |
| ATOM | 2388 | HG   | LEU | 151 | 29.431 | 24.987 | 17.464 | 0.00 | 0.00 |
| ATOM | 2389 | CD1  | LEU | 151 | 28.460 | 25.414 | 16.400 | 0.00 | 0.00 |
| ATOM | 2390 | 1HD1 | LEU | 151 | 28.334 | 25.738 | 16.389 | 0.00 | 0.00 |
| ATOM | 2391 | 2HD1 | LEU | 151 | 28.166 | 25.236 | 16.035 | 0.00 | 0.00 |
| ATOM | 2392 | 3HD1 | LEU | 151 | 28.080 | 25.271 | 16.449 | 0.00 | 0.00 |
| ATOM | 2393 | CD2  | LEU | 151 | 29.925 | 24.636 | 16.104 | 0.00 | 0.00 |
| ATOM | 2394 | 1HD2 | LEU | 151 | 29.875 | 24.266 | 15.867 | 0.00 | 0.00 |
| ATOM | 2395 | 2HD2 | LEU | 151 | 29.991 | 24.639 | 15.909 | 0.00 | 0.00 |
| ATOM | 2396 | 3HD2 | LEU | 151 | 30.187 | 24.441 | 15.992 | 0.00 | 0.00 |
| ATOM | 2397 | C    | LEU | 151 | 32.372 | 27.746 | 18.251 | 0.00 | 0.00 |
| ATOM | 2398 | O    | LEU | 151 | 32.056 | 28.794 | 17.740 | 0.00 | 0.00 |
| ATOM | 2399 | N    | THR | 152 | 33.422 | 27.675 | 19.047 | 0.00 | 0.00 |
| ATOM | 2400 | H    | THR | 152 | 33.657 | 26.779 | 19.394 | 0.00 | 0.00 |
| ATOM | 2401 | CA   | THR | 152 | 34.233 | 28.810 | 19.478 | 0.00 | 0.00 |
| ATOM | 2402 | HA   | THR | 152 | 33.565 | 29.565 | 19.852 | 0.00 | 0.00 |
| ATOM | 2403 | CB   | THR | 152 | 35.163 | 28.411 | 20.613 | 0.00 | 0.00 |
| ATOM | 2404 | HB   | THR | 152 | 35.744 | 29.259 | 20.904 | 0.00 | 0.00 |
| ATOM | 2405 | CG2  | THR | 152 | 34.423 | 27.902 | 21.823 | 0.00 | 0.00 |
| ATOM | 2406 | 1HG2 | THR | 152 | 34.241 | 27.736 | 22.099 | 0.00 | 0.00 |
| ATOM | 2407 | 2HG2 | THR | 152 | 34.293 | 27.796 | 22.135 | 0.00 | 0.00 |
| ATOM | 2408 | 3HG2 | THR | 152 | 34.201 | 27.817 | 22.128 | 0.00 | 0.00 |
| ATOM | 2409 | OG1  | THR | 152 | 36.018 | 27.401 | 20.218 | 0.00 | 0.00 |
| ATOM | 2410 | HG1  | THR | 152 | 36.635 | 27.345 | 20.811 | 0.00 | 0.00 |
| ATOM | 2411 | C    | THR | 152 | 35.026 | 29.461 | 18.363 | 0.00 | 0.00 |
| ATOM | 2412 | O    | THR | 152 | 35.318 | 30.633 | 18.445 | 0.00 | 0.00 |
| ATOM | 2413 | N    | GLY | 153 | 35.336 | 28.742 | 17.301 | 0.00 | 0.00 |
| ATOM | 2414 | H    | GLY | 153 | 35.101 | 27.786 | 17.317 | 0.00 | 0.00 |



|      |      |      |     |     |        |        |        |      |      |
|------|------|------|-----|-----|--------|--------|--------|------|------|
| ATOM | 2415 | CA   | GLY | 153 | 36.000 | 29.235 | 16.114 | 0.00 | 0.00 |
| ATOM | 2416 | HA2  | GLY | 153 | 36.789 | 29.893 | 16.396 | 0.00 | 0.00 |
| ATOM | 2417 | HA3  | GLY | 153 | 36.439 | 28.404 | 15.614 | 0.00 | 0.00 |
| ATOM | 2418 | C    | GLY | 153 | 35.106 | 29.952 | 15.115 | 0.00 | 0.00 |
| ATOM | 2419 | O    | GLY | 153 | 35.591 | 30.436 | 14.154 | 0.00 | 0.00 |
| ATOM | 2420 | N    | PHE | 154 | 33.819 | 30.035 | 15.329 | 0.00 | 0.00 |
| ATOM | 2421 | H    | PHE | 154 | 33.489 | 29.613 | 16.143 | 0.00 | 0.00 |
| ATOM | 2422 | CA   | PHE | 154 | 32.843 | 30.634 | 14.418 | 0.00 | 0.00 |
| ATOM | 2423 | HA   | PHE | 154 | 33.272 | 30.681 | 13.438 | 0.00 | 0.00 |
| ATOM | 2424 | CB   | PHE | 154 | 31.612 | 29.741 | 14.304 | 0.00 | 0.00 |
| ATOM | 2425 | HB2  | PHE | 154 | 31.251 | 29.498 | 15.276 | 0.00 | 0.00 |
| ATOM | 2426 | HB3  | PHE | 154 | 30.836 | 30.290 | 13.819 | 0.00 | 0.00 |
| ATOM | 2427 | CG   | PHE | 154 | 31.813 | 28.476 | 13.542 | 0.00 | 0.00 |
| ATOM | 2428 | CD1  | PHE | 154 | 32.243 | 27.618 | 13.631 | 0.00 | 0.00 |
| ATOM | 2429 | HD1  | PHE | 154 | 32.437 | 27.847 | 14.243 | 0.00 | 0.00 |
| ATOM | 2430 | CE1  | PHE | 154 | 32.409 | 26.453 | 12.930 | 0.00 | 0.00 |
| ATOM | 2431 | HE1  | PHE | 154 | 32.724 | 25.805 | 13.007 | 0.00 | 0.00 |
| ATOM | 2432 | CZ   | PHE | 154 | 32.148 | 26.135 | 12.138 | 0.00 | 0.00 |
| ATOM | 2433 | HZ   | PHE | 154 | 32.270 | 25.245 | 11.598 | 0.00 | 0.00 |
| ATOM | 2434 | CE2  | PHE | 154 | 31.725 | 26.983 | 12.037 | 0.00 | 0.00 |
| ATOM | 2435 | HE2  | PHE | 154 | 31.537 | 26.738 | 11.432 | 0.00 | 0.00 |
| ATOM | 2436 | CD2  | PHE | 154 | 31.562 | 28.151 | 12.732 | 0.00 | 0.00 |
| ATOM | 2437 | HD2  | PHE | 154 | 31.242 | 28.797 | 12.649 | 0.00 | 0.00 |
| ATOM | 2438 | C    | PHE | 154 | 32.470 | 32.077 | 14.754 | 0.00 | 0.00 |
| ATOM | 2439 | O    | PHE | 154 | 31.619 | 32.652 | 14.100 | 0.00 | 0.00 |
| ATOM | 2440 | N    | LEU | 155 | 33.108 | 32.706 | 15.732 | 0.00 | 0.00 |
| ATOM | 2441 | H    | LEU | 155 | 33.839 | 32.230 | 16.195 | 0.00 | 0.00 |
| ATOM | 2442 | CA   | LEU | 155 | 32.794 | 34.073 | 16.146 | 0.00 | 0.00 |
| ATOM | 2443 | HA   | LEU | 155 | 31.734 | 34.135 | 16.336 | 0.00 | 0.00 |
| ATOM | 2444 | CB   | LEU | 155 | 33.539 | 34.402 | 17.440 | 0.00 | 0.00 |
| ATOM | 2445 | HB2  | LEU | 155 | 34.583 | 34.293 | 17.273 | 0.00 | 0.00 |
| ATOM | 2446 | HB3  | LEU | 155 | 33.364 | 35.430 | 17.663 | 0.00 | 0.00 |
| ATOM | 2447 | CG   | LEU | 155 | 33.166 | 33.581 | 18.668 | 0.00 | 0.00 |
| ATOM | 2448 | HG   | LEU | 155 | 33.343 | 32.573 | 18.481 | 0.00 | 0.00 |
| ATOM | 2449 | CD1  | LEU | 155 | 34.000 | 33.975 | 19.821 | 0.00 | 0.00 |
| ATOM | 2450 | 1HD1 | LEU | 155 | 34.373 | 33.841 | 20.046 | 0.00 | 0.00 |
| ATOM | 2451 | 2HD1 | LEU | 155 | 34.259 | 34.316 | 19.988 | 0.00 | 0.00 |
| ATOM | 2452 | 3HD1 | LEU | 155 | 33.991 | 34.041 | 20.268 | 0.00 | 0.00 |
| ATOM | 2453 | CD2  | LEU | 155 | 31.757 | 33.741 | 19.050 | 0.00 | 0.00 |
| ATOM | 2454 | 1HD2 | LEU | 155 | 31.388 | 33.974 | 18.880 | 0.00 | 0.00 |
| ATOM | 2455 | 2HD2 | LEU | 155 | 31.350 | 33.453 | 19.111 | 0.00 | 0.00 |
| ATOM | 2456 | 3HD2 | LEU | 155 | 31.506 | 33.893 | 19.448 | 0.00 | 0.00 |
| ATOM | 2457 | C    | LEU | 155 | 33.077 | 35.115 | 15.060 | 0.00 | 0.00 |
| ATOM | 2458 | O    | LEU | 155 | 32.329 | 36.070 | 14.934 | 0.00 | 0.00 |
| ATOM | 2459 | N    | GLY | 156 | 34.096 | 34.912 | 14.236 | 0.00 | 0.00 |
| ATOM | 2460 | H    | GLY | 156 | 34.690 | 34.142 | 14.426 | 0.00 | 0.00 |
| ATOM | 2461 | CA   | GLY | 156 | 34.378 | 35.714 | 13.047 | 0.00 | 0.00 |
| ATOM | 2462 | HA2  | GLY | 156 | 34.457 | 36.749 | 13.318 | 0.00 | 0.00 |
| ATOM | 2463 | HA3  | GLY | 156 | 35.319 | 35.400 | 12.637 | 0.00 | 0.00 |
| ATOM | 2464 | C    | GLY | 156 | 33.321 | 35.562 | 11.957 | 0.00 | 0.00 |
| ATOM | 2465 | O    | GLY | 156 | 32.913 | 36.543 | 11.360 | 0.00 | 0.00 |
| ATOM | 2466 | N    | GLN | 157 | 32.812 | 34.355 | 11.744 | 0.00 | 0.00 |
| ATOM | 2467 | H    | GLN | 157 | 33.211 | 33.600 | 12.243 | 0.00 | 0.00 |
| ATOM | 2468 | CA   | GLN | 157 | 31.723 | 34.079 | 10.811 | 0.00 | 0.00 |
| ATOM | 2469 | HA   | GLN | 157 | 31.980 | 34.511 | 9.856  | 0.00 | 0.00 |
| ATOM | 2470 | CB   | GLN | 157 | 31.582 | 32.568 | 10.632 | 0.00 | 0.00 |
| ATOM | 2471 | HB2  | GLN | 157 | 32.549 | 32.145 | 10.503 | 0.00 | 0.00 |
| ATOM | 2472 | HB3  | GLN | 157 | 31.141 | 32.140 | 11.500 | 0.00 | 0.00 |
| ATOM | 2473 | CG   | GLN | 157 | 30.746 | 32.207 | 9.428  | 0.00 | 0.00 |
| ATOM | 2474 | HG2  | GLN | 157 | 29.807 | 32.691 | 9.486  | 0.00 | 0.00 |
| ATOM | 2475 | HG3  | GLN | 157 | 31.231 | 32.542 | 8.555  | 0.00 | 0.00 |
| ATOM | 2476 | CD   | GLN | 157 | 30.492 | 30.732 | 9.320  | 0.00 | 0.00 |
| ATOM | 2477 | OE1  | GLN | 157 | 29.664 | 30.182 | 9.839  | 0.00 | 0.00 |
| ATOM | 2478 | NE2  | GLN | 157 | 31.185 | 30.041 | 8.666  | 0.00 | 0.00 |
| ATOM | 2479 | 1HE2 | GLN | 157 | 30.998 | 29.086 | 8.585  | 0.00 | 0.00 |
| ATOM | 2480 | 2HE2 | GLN | 157 | 31.870 | 30.472 | 8.244  | 0.00 | 0.00 |
| ATOM | 2481 | C    | GLN | 157 | 30.409 | 34.725 | 11.256 | 0.00 | 0.00 |
| ATOM | 2482 | O    | GLN | 157 | 29.746 | 35.356 | 10.451 | 0.00 | 0.00 |
| ATOM | 2483 | N    | VAL | 158 | 30.066 | 34.649 | 12.537 | 0.00 | 0.00 |
| ATOM | 2484 | H    | VAL | 158 | 30.617 | 34.073 | 13.134 | 0.00 | 0.00 |
| ATOM | 2485 | CA   | VAL | 158 | 28.909 | 35.352 | 13.114 | 0.00 | 0.00 |
| ATOM | 2486 | HA   | VAL | 158 | 28.038 | 35.099 | 12.527 | 0.00 | 0.00 |
| ATOM | 2487 | CB   | VAL | 158 | 28.647 | 34.919 | 14.563 | 0.00 | 0.00 |
| ATOM | 2488 | HB   | VAL | 158 | 29.533 | 35.082 | 15.139 | 0.00 | 0.00 |
| ATOM | 2489 | CG1  | VAL | 158 | 27.520 | 35.696 | 15.200 | 0.00 | 0.00 |
| ATOM | 2490 | 1HG1 | VAL | 158 | 27.453 | 35.793 | 15.796 | 0.00 | 0.00 |
| ATOM | 2491 | 2HG1 | VAL | 158 | 27.377 | 36.285 | 15.104 | 0.00 | 0.00 |
| ATOM | 2492 | 3HG1 | VAL | 158 | 26.908 | 35.591 | 15.184 | 0.00 | 0.00 |
| ATOM | 2493 | CG2  | VAL | 158 | 28.285 | 33.452 | 14.661 | 0.00 | 0.00 |
| ATOM | 2494 | 1HG2 | VAL | 158 | 28.195 | 33.114 | 14.785 | 0.00 | 0.00 |
| ATOM | 2495 | 2HG2 | VAL | 158 | 28.115 | 33.102 | 14.643 | 0.00 | 0.00 |
| ATOM | 2496 | 3HG2 | VAL | 158 | 28.279 | 33.053 | 14.656 | 0.00 | 0.00 |
| ATOM | 2497 | C    | VAL | 158 | 29.071 | 36.863 | 13.022 | 0.00 | 0.00 |
| ATOM | 2498 | O    | VAL | 158 | 28.124 | 37.551 | 12.685 | 0.00 | 0.00 |
| ATOM | 2499 | N    | THR | 159 | 30.273 | 37.385 | 13.233 | 0.00 | 0.00 |
| ATOM | 2500 | H    | THR | 159 | 31.005 | 36.776 | 13.521 | 0.00 | 0.00 |
| ATOM | 2501 | CA   | THR | 159 | 30.570 | 38.807 | 13.059 | 0.00 | 0.00 |
| ATOM | 2502 | HA   | THR | 159 | 29.915 | 39.371 | 13.702 | 0.00 | 0.00 |
| ATOM | 2503 | CB   | THR | 159 | 32.005 | 39.114 | 13.467 | 0.00 | 0.00 |
| ATOM | 2504 | HB   | THR | 159 | 32.682 | 38.508 | 12.900 | 0.00 | 0.00 |
| ATOM | 2505 | CG2  | THR | 159 | 32.363 | 40.562 | 13.246 | 0.00 | 0.00 |
| ATOM | 2506 | 1HG2 | THR | 159 | 32.279 | 40.967 | 13.218 | 0.00 | 0.00 |
| ATOM | 2507 | 2HG2 | THR | 159 | 32.575 | 40.903 | 13.334 | 0.00 | 0.00 |
| ATOM | 2508 | 3HG2 | THR | 159 | 32.517 | 40.876 | 13.011 | 0.00 | 0.00 |
| ATOM | 2509 | OG1  | THR | 159 | 32.205 | 38.834 | 14.820 | 0.00 | 0.00 |
| ATOM | 2510 | HG1  | THR | 159 | 32.242 | 37.912 | 14.927 | 0.00 | 0.00 |
| ATOM | 2511 | C    | THR | 159 | 30.307 | 39.259 | 11.632 | 0.00 | 0.00 |
| ATOM | 2512 | O    | THR | 159 | 29.551 | 40.190 | 11.423 | 0.00 | 0.00 |
| ATOM | 2513 | N    | ARG | 160 | 30.847 | 38.567 | 10.630 | 0.00 | 0.00 |
| ATOM | 2514 | H    | ARG | 160 | 31.441 | 37.804 | 10.854 | 0.00 | 0.00 |
| ATOM | 2515 | CA   | ARG | 160 | 30.613 | 38.899 | 9.225  | 0.00 | 0.00 |
| ATOM | 2516 | HA   | ARG | 160 | 30.832 | 39.941 | 9.094  | 0.00 | 0.00 |
| ATOM | 2517 | CB   | ARG | 160 | 31.575 | 38.111 | 8.360  | 0.00 | 0.00 |
| ATOM | 2518 | HB2  | ARG | 160 | 32.570 | 38.340 | 8.667  | 0.00 | 0.00 |
| ATOM | 2519 | HB3  | ARG | 160 | 31.442 | 37.068 | 8.550  | 0.00 | 0.00 |

|      |      |      |     |     |        |        |        |      |      |
|------|------|------|-----|-----|--------|--------|--------|------|------|
| ATOM | 2520 | CG   | ARG | 160 | 31.455 | 38.339 | 6.856  | 0.00 | 0.00 |
| ATOM | 2521 | HG2  | ARG | 160 | 32.258 | 37.823 | 6.383  | 0.00 | 0.00 |
| ATOM | 2522 | HG3  | ARG | 160 | 30.549 | 37.893 | 6.514  | 0.00 | 0.00 |
| ATOM | 2523 | CD   | ARG | 160 | 31.461 | 39.768 | 6.363  | 0.00 | 0.00 |
| ATOM | 2524 | HD2  | ARG | 160 | 31.393 | 39.740 | 5.298  | 0.00 | 0.00 |
| ATOM | 2525 | HD3  | ARG | 160 | 30.602 | 40.276 | 6.731  | 0.00 | 0.00 |
| ATOM | 2526 | NE   | ARG | 160 | 32.650 | 40.509 | 6.736  | 0.00 | 0.00 |
| ATOM | 2527 | HE   | ARG | 160 | 33.297 | 40.071 | 7.308  | 0.00 | 0.00 |
| ATOM | 2528 | CZ   | ARG | 160 | 32.988 | 41.691 | 6.348  | 0.00 | 0.00 |
| ATOM | 2529 | NH1  | ARG | 160 | 34.067 | 42.217 | 6.767  | 0.00 | 0.00 |
| ATOM | 2530 | 1HH1 | ARG | 160 | 34.643 | 41.716 | 7.374  | 0.00 | 0.00 |
| ATOM | 2531 | 2HH1 | ARG | 160 | 34.357 | 43.084 | 6.432  | 0.00 | 0.00 |
| ATOM | 2532 | NH2  | ARG | 160 | 32.284 | 42.382 | 5.566  | 0.00 | 0.00 |
| ATOM | 2533 | 1HH2 | ARG | 160 | 31.464 | 42.015 | 5.165  | 0.00 | 0.00 |
| ATOM | 2534 | 2HH2 | ARG | 160 | 32.606 | 43.265 | 5.291  | 0.00 | 0.00 |
| ATOM | 2535 | C    | ARG | 160 | 29.154 | 38.741 | 8.824  | 0.00 | 0.00 |
| ATOM | 2536 | O    | ARG | 160 | 28.668 | 39.560 | 8.074  | 0.00 | 0.00 |
| ATOM | 2537 | N    | PHE | 161 | 28.427 | 37.783 | 9.374  | 0.00 | 0.00 |
| ATOM | 2538 | H    | PHE | 161 | 28.884 | 37.133 | 9.970  | 0.00 | 0.00 |
| ATOM | 2539 | CA   | PHE | 161 | 26.998 | 37.622 | 9.143  | 0.00 | 0.00 |
| ATOM | 2540 | HA   | PHE | 161 | 26.832 | 37.535 | 8.081  | 0.00 | 0.00 |
| ATOM | 2541 | CB   | PHE | 161 | 26.542 | 36.320 | 9.801  | 0.00 | 0.00 |
| ATOM | 2542 | HB2  | PHE | 161 | 27.076 | 35.506 | 9.377  | 0.00 | 0.00 |
| ATOM | 2543 | HB3  | PHE | 161 | 26.786 | 36.344 | 10.832 | 0.00 | 0.00 |
| ATOM | 2544 | CG   | PHE | 161 | 25.094 | 36.020 | 9.671  | 0.00 | 0.00 |
| ATOM | 2545 | CD1  | PHE | 161 | 24.246 | 36.264 | 10.707 | 0.00 | 0.00 |
| ATOM | 2546 | HD1  | PHE | 161 | 24.619 | 36.663 | 11.590 | 0.00 | 0.00 |
| ATOM | 2547 | CE1  | PHE | 161 | 22.906 | 35.981 | 10.590 | 0.00 | 0.00 |
| ATOM | 2548 | HE1  | PHE | 161 | 22.267 | 36.161 | 11.388 | 0.00 | 0.00 |
| ATOM | 2549 | CZ   | PHE | 161 | 22.414 | 35.467 | 9.432  | 0.00 | 0.00 |
| ATOM | 2550 | HZ   | PHE | 161 | 21.393 | 35.245 | 9.340  | 0.00 | 0.00 |
| ATOM | 2551 | CE2  | PHE | 161 | 23.258 | 35.216 | 8.401  | 0.00 | 0.00 |
| ATOM | 2552 | HE2  | PHE | 161 | 22.884 | 34.815 | 7.519  | 0.00 | 0.00 |
| ATOM | 2553 | CD2  | PHE | 161 | 24.597 | 35.489 | 8.524  | 0.00 | 0.00 |
| ATOM | 2554 | HD2  | PHE | 161 | 25.245 | 35.286 | 7.735  | 0.00 | 0.00 |
| ATOM | 2555 | C    | PHE | 161 | 26.177 | 38.835 | 9.610  | 0.00 | 0.00 |
| ATOM | 2556 | O    | PHE | 161 | 25.293 | 39.282 | 8.904  | 0.00 | 0.00 |
| ATOM | 2557 | N    | VAL | 162 | 26.486 | 39.404 | 10.768 | 0.00 | 0.00 |
| ATOM | 2558 | H    | VAL | 162 | 27.198 | 38.974 | 11.312 | 0.00 | 0.00 |
| ATOM | 2559 | CA   | VAL | 162 | 25.821 | 40.608 | 11.277 | 0.00 | 0.00 |
| ATOM | 2560 | HA   | VAL | 162 | 24.768 | 40.519 | 11.081 | 0.00 | 0.00 |
| ATOM | 2561 | CB   | VAL | 162 | 25.986 | 40.732 | 12.792 | 0.00 | 0.00 |
| ATOM | 2562 | HB   | VAL | 162 | 27.013 | 40.752 | 13.029 | 0.00 | 0.00 |
| ATOM | 2563 | CG1  | VAL | 162 | 25.360 | 41.981 | 13.328 | 0.00 | 0.00 |
| ATOM | 2564 | 1HG1 | VAL | 162 | 25.526 | 42.330 | 13.696 | 0.00 | 0.00 |
| ATOM | 2565 | 2HG1 | VAL | 162 | 25.213 | 42.434 | 13.097 | 0.00 | 0.00 |
| ATOM | 2566 | 3HG1 | VAL | 162 | 24.896 | 42.103 | 13.592 | 0.00 | 0.00 |
| ATOM | 2567 | CG2  | VAL | 162 | 25.364 | 39.572 | 13.518 | 0.00 | 0.00 |
| ATOM | 2568 | 1HG2 | VAL | 162 | 25.190 | 39.210 | 13.584 | 0.00 | 0.00 |
| ATOM | 2569 | 2HG2 | VAL | 162 | 25.334 | 39.255 | 13.775 | 0.00 | 0.00 |
| ATOM | 2570 | 3HG2 | VAL | 162 | 25.122 | 39.391 | 13.746 | 0.00 | 0.00 |
| ATOM | 2571 | C    | VAL | 162 | 26.273 | 41.869 | 10.542 | 0.00 | 0.00 |
| ATOM | 2572 | O    | VAL | 162 | 25.447 | 42.711 | 10.234 | 0.00 | 0.00 |
| ATOM | 2573 | N    | VAL | 163 | 27.549 | 41.989 | 10.187 | 0.00 | 0.00 |
| ATOM | 2574 | H    | VAL | 163 | 28.175 | 41.275 | 10.489 | 0.00 | 0.00 |
| ATOM | 2575 | CA   | VAL | 163 | 28.077 | 43.108 | 9.393  | 0.00 | 0.00 |
| ATOM | 2576 | HA   | VAL | 163 | 27.775 | 44.030 | 9.862  | 0.00 | 0.00 |
| ATOM | 2577 | CB   | VAL | 163 | 29.601 | 43.072 | 9.384  | 0.00 | 0.00 |
| ATOM | 2578 | HB   | VAL | 163 | 29.925 | 42.090 | 9.102  | 0.00 | 0.00 |
| ATOM | 2579 | CG1  | VAL | 163 | 30.220 | 44.062 | 8.426  | 0.00 | 0.00 |
| ATOM | 2580 | 1HG1 | VAL | 163 | 29.860 | 45.041 | 8.612  | 0.00 | 0.00 |
| ATOM | 2581 | 2HG1 | VAL | 163 | 31.276 | 44.054 | 8.534  | 0.00 | 0.00 |
| ATOM | 2582 | 3HG1 | VAL | 163 | 30.004 | 43.807 | 7.423  | 0.00 | 0.00 |
| ATOM | 2583 | CG2  | VAL | 163 | 30.153 | 43.363 | 10.760 | 0.00 | 0.00 |
| ATOM | 2584 | 1HG2 | VAL | 163 | 30.538 | 43.353 | 11.029 | 0.00 | 0.00 |
| ATOM | 2585 | 2HG2 | VAL | 163 | 30.221 | 43.679 | 11.078 | 0.00 | 0.00 |
| ATOM | 2586 | 3HG2 | VAL | 163 | 30.127 | 43.248 | 11.191 | 0.00 | 0.00 |
| ATOM | 2587 | C    | VAL | 163 | 27.499 | 43.137 | 7.979  | 0.00 | 0.00 |
| ATOM | 2588 | O    | VAL | 163 | 27.169 | 44.200 | 7.479  | 0.00 | 0.00 |
| ATOM | 2589 | N    | ASP | 164 | 27.291 | 41.987 | 7.355  | 0.00 | 0.00 |
| ATOM | 2590 | H    | ASP | 164 | 27.619 | 41.148 | 7.783  | 0.00 | 0.00 |
| ATOM | 2591 | CA   | ASP | 164 | 26.650 | 41.876 | 6.051  | 0.00 | 0.00 |
| ATOM | 2592 | HA   | ASP | 164 | 27.154 | 42.542 | 5.370  | 0.00 | 0.00 |
| ATOM | 2593 | CB   | ASP | 164 | 26.811 | 40.456 | 5.534  | 0.00 | 0.00 |
| ATOM | 2594 | HB2  | ASP | 164 | 27.837 | 40.167 | 5.591  | 0.00 | 0.00 |
| ATOM | 2595 | HB3  | ASP | 164 | 26.249 | 39.778 | 6.134  | 0.00 | 0.00 |
| ATOM | 2596 | CG   | ASP | 164 | 26.368 | 40.343 | 4.101  | 0.00 | 0.00 |
| ATOM | 2597 | OD1  | ASP | 164 | 25.241 | 40.095 | 3.835  | 0.00 | 0.00 |
| ATOM | 2598 | OD2  | ASP | 164 | 27.139 | 40.546 | 3.238  | 0.00 | 0.00 |
| ATOM | 2599 | C    | ASP | 164 | 25.182 | 42.300 | 6.090  | 0.00 | 0.00 |
| ATOM | 2600 | O    | ASP | 164 | 24.725 | 42.992 | 5.193  | 0.00 | 0.00 |
| ATOM | 2601 | N    | PHE | 165 | 24.464 | 41.968 | 7.158  | 0.00 | 0.00 |
| ATOM | 2602 | H    | PHE | 165 | 24.895 | 41.394 | 7.846  | 0.00 | 0.00 |
| ATOM | 2603 | CA   | PHE | 165 | 23.114 | 42.456 | 7.411  | 0.00 | 0.00 |
| ATOM | 2604 | HA   | PHE | 165 | 22.510 | 42.246 | 6.540  | 0.00 | 0.00 |
| ATOM | 2605 | CB   | PHE | 165 | 22.511 | 41.703 | 8.598  | 0.00 | 0.00 |
| ATOM | 2606 | HB2  | PHE | 165 | 22.605 | 40.656 | 8.418  | 0.00 | 0.00 |
| ATOM | 2607 | HB3  | PHE | 165 | 23.065 | 41.910 | 9.488  | 0.00 | 0.00 |
| ATOM | 2608 | CG   | PHE | 165 | 21.062 | 42.000 | 8.867  | 0.00 | 0.00 |
| ATOM | 2609 | CD1  | PHE | 165 | 20.081 | 41.205 | 8.329  | 0.00 | 0.00 |
| ATOM | 2610 | HD1  | PHE | 165 | 20.351 | 40.386 | 7.732  | 0.00 | 0.00 |
| ATOM | 2611 | CE1  | PHE | 165 | 18.749 | 41.493 | 8.551  | 0.00 | 0.00 |
| ATOM | 2612 | HE1  | PHE | 165 | 18.003 | 40.885 | 8.139  | 0.00 | 0.00 |
| ATOM | 2613 | CZ   | PHE | 165 | 18.392 | 42.574 | 9.315  | 0.00 | 0.00 |
| ATOM | 2614 | HZ   | PHE | 165 | 17.375 | 42.807 | 9.471  | 0.00 | 0.00 |
| ATOM | 2615 | CE2  | PHE | 165 | 19.360 | 43.359 | 9.866  | 0.00 | 0.00 |
| ATOM | 2616 | HE2  | PHE | 165 | 19.082 | 44.185 | 10.446 | 0.00 | 0.00 |
| ATOM | 2617 | CD2  | PHE | 165 | 20.693 | 43.072 | 9.652  | 0.00 | 0.00 |
| ATOM | 2618 | HD2  | PHE | 165 | 21.433 | 43.677 | 10.079 | 0.00 | 0.00 |
| ATOM | 2619 | C    | PHE | 165 | 23.096 | 43.976 | 7.614  | 0.00 | 0.00 |
| ATOM | 2620 | O    | PHE | 165 | 22.264 | 44.658 | 7.042  | 0.00 | 0.00 |
| ATOM | 2621 | N    | MET | 166 | 24.041 | 44.523 | 8.380  | 0.00 | 0.00 |
| ATOM | 2622 | H    | MET | 166 | 24.687 | 43.908 | 8.815  | 0.00 | 0.00 |
| ATOM | 2623 | CA   | MET | 166 | 24.188 | 45.963 | 8.584  | 0.00 | 0.00 |
| ATOM | 2624 | HA   | MET | 166 | 23.260 | 46.341 | 8.976  | 0.00 | 0.00 |

|      |      |      |     |     |        |        |        |      |      |
|------|------|------|-----|-----|--------|--------|--------|------|------|
| ATOM | 2625 | CB   | MET | 166 | 25.290 | 46.248 | 9.599  | 0.00 | 0.00 |
| ATOM | 2626 | HB2  | MET | 166 | 25.834 | 45.682 | 9.787  | 0.00 | 0.00 |
| ATOM | 2627 | HB3  | MET | 166 | 25.748 | 46.804 | 9.364  | 0.00 | 0.00 |
| ATOM | 2628 | CG   | MET | 166 | 25.090 | 46.570 | 10.692 | 0.00 | 0.00 |
| ATOM | 2629 | HG2  | MET | 166 | 24.889 | 46.840 | 10.808 | 0.00 | 0.00 |
| ATOM | 2630 | HG3  | MET | 166 | 24.934 | 46.228 | 10.543 | 0.00 | 0.00 |
| ATOM | 2631 | SD   | MET | 166 | 25.422 | 47.060 | 12.044 | 0.00 | 0.00 |
| ATOM | 2632 | CE   | MET | 166 | 25.615 | 47.378 | 12.861 | 0.00 | 0.00 |
| ATOM | 2633 | HE1  | MET | 166 | 25.571 | 47.458 | 13.101 | 0.00 | 0.00 |
| ATOM | 2634 | HE2  | MET | 166 | 25.733 | 47.333 | 12.960 | 0.00 | 0.00 |
| ATOM | 2635 | HE3  | MET | 166 | 25.676 | 47.540 | 13.019 | 0.00 | 0.00 |
| ATOM | 2636 | C    | MET | 166 | 24.446 | 46.712 | 7.278  | 0.00 | 0.00 |
| ATOM | 2637 | O    | MET | 166 | 23.855 | 47.752 | 7.048  | 0.00 | 0.00 |
| ATOM | 2638 | N    | LEU | 167 | 25.272 | 46.166 | 6.397  | 0.00 | 0.00 |
| ATOM | 2639 | H    | LEU | 167 | 25.763 | 45.344 | 6.668  | 0.00 | 0.00 |
| ATOM | 2640 | CA   | LEU | 167 | 25.534 | 46.704 | 5.065  | 0.00 | 0.00 |
| ATOM | 2641 | HA   | LEU | 167 | 25.789 | 47.748 | 5.183  | 0.00 | 0.00 |
| ATOM | 2642 | CB   | LEU | 167 | 26.748 | 45.982 | 4.472  | 0.00 | 0.00 |
| ATOM | 2643 | HB2  | LEU | 167 | 27.576 | 46.112 | 5.139  | 0.00 | 0.00 |
| ATOM | 2644 | HB3  | LEU | 167 | 26.528 | 44.935 | 4.421  | 0.00 | 0.00 |
| ATOM | 2645 | CG   | LEU | 167 | 27.180 | 46.438 | 3.084  | 0.00 | 0.00 |
| ATOM | 2646 | HG   | LEU | 167 | 26.390 | 46.274 | 2.399  | 0.00 | 0.00 |
| ATOM | 2647 | CD1  | LEU | 167 | 27.545 | 47.887 | 3.026  | 0.00 | 0.00 |
| ATOM | 2648 | 1HD1 | LEU | 167 | 27.520 | 48.270 | 3.045  | 0.00 | 0.00 |
| ATOM | 2649 | 2HD1 | LEU | 167 | 27.721 | 48.238 | 3.081  | 0.00 | 0.00 |
| ATOM | 2650 | 3HD1 | LEU | 167 | 27.649 | 48.223 | 2.893  | 0.00 | 0.00 |
| ATOM | 2651 | CD2  | LEU | 167 | 28.357 | 45.641 | 2.629  | 0.00 | 0.00 |
| ATOM | 2652 | 1HD2 | LEU | 167 | 28.994 | 45.748 | 2.958  | 0.00 | 0.00 |
| ATOM | 2653 | 2HD2 | LEU | 167 | 28.330 | 44.904 | 2.661  | 0.00 | 0.00 |
| ATOM | 2654 | 3HD2 | LEU | 167 | 28.597 | 45.683 | 1.926  | 0.00 | 0.00 |
| ATOM | 2655 | C    | LEU | 167 | 24.295 | 46.638 | 4.167  | 0.00 | 0.00 |
| ATOM | 2656 | O    | LEU | 167 | 23.919 | 47.632 | 3.609  | 0.00 | 0.00 |
| ATOM | 2657 | N    | HIP | 168 | 23.627 | 45.506 | 4.065  | 0.00 | 0.00 |
| ATOM | 2658 | H    | HIP | 168 | 23.977 | 44.733 | 4.571  | 0.00 | 0.00 |
| ATOM | 2659 | CA   | HIP | 168 | 22.520 | 45.276 | 3.128  | 0.00 | 0.00 |
| ATOM | 2660 | HA   | HIP | 168 | 22.706 | 45.862 | 2.246  | 0.00 | 0.00 |
| ATOM | 2661 | CB   | HIP | 168 | 22.525 | 43.822 | 2.685  | 0.00 | 0.00 |
| ATOM | 2662 | HB2  | HIP | 168 | 22.443 | 43.178 | 3.535  | 0.00 | 0.00 |
| ATOM | 2663 | HB3  | HIP | 168 | 21.675 | 43.649 | 2.065  | 0.00 | 0.00 |
| ATOM | 2664 | CG   | HIP | 168 | 23.732 | 43.458 | 1.903  | 0.00 | 0.00 |
| ATOM | 2665 | ND1  | HIP | 168 | 24.681 | 42.549 | 2.222  | 0.00 | 0.00 |
| ATOM | 2666 | HD1  | HIP | 168 | 24.682 | 41.976 | 3.007  | 0.00 | 0.00 |
| ATOM | 2667 | CE1  | HIP | 168 | 25.586 | 42.522 | 1.283  | 0.00 | 0.00 |
| ATOM | 2668 | HE1  | HIP | 168 | 26.429 | 41.891 | 1.256  | 0.00 | 0.00 |
| ATOM | 2669 | NE2  | HIP | 168 | 25.245 | 43.391 | 0.381  | 0.00 | 0.00 |
| ATOM | 2670 | HE2  | HIP | 168 | 25.736 | 43.562 | -0.434 | 0.00 | 0.00 |
| ATOM | 2671 | CD2  | HIP | 168 | 24.084 | 43.984 | 0.752  | 0.00 | 0.00 |
| ATOM | 2672 | HD2  | HIP | 168 | 23.552 | 44.723 | 0.241  | 0.00 | 0.00 |
| ATOM | 2673 | C    | HIP | 168 | 21.152 | 45.757 | 3.602  | 0.00 | 0.00 |
| ATOM | 2674 | O    | HIP | 168 | 20.243 | 45.677 | 2.880  | 0.00 | 0.00 |
| ATOM | 2675 | N    | HIP | 169 | 21.004 | 46.294 | 4.780  | 0.00 | 0.00 |
| ATOM | 2676 | H    | HIP | 169 | 21.783 | 46.256 | 5.337  | 0.00 | 0.00 |
| ATOM | 2677 | CA   | HIP | 169 | 19.796 | 46.962 | 5.291  | 0.00 | 0.00 |
| ATOM | 2678 | HA   | HIP | 169 | 19.073 | 46.991 | 4.491  | 0.00 | 0.00 |
| ATOM | 2679 | CB   | HIP | 169 | 19.157 | 46.131 | 6.411  | 0.00 | 0.00 |
| ATOM | 2680 | HB2  | HIP | 169 | 19.880 | 45.924 | 7.173  | 0.00 | 0.00 |
| ATOM | 2681 | HB3  | HIP | 169 | 18.365 | 46.689 | 6.870  | 0.00 | 0.00 |
| ATOM | 2682 | CG   | HIP | 169 | 18.575 | 44.839 | 5.927  | 0.00 | 0.00 |
| ATOM | 2683 | ND1  | HIP | 169 | 17.386 | 44.674 | 5.348  | 0.00 | 0.00 |
| ATOM | 2684 | HD1  | HIP | 169 | 16.756 | 45.387 | 5.185  | 0.00 | 0.00 |
| ATOM | 2685 | CE1  | HIP | 169 | 17.238 | 43.401 | 5.010  | 0.00 | 0.00 |
| ATOM | 2686 | HE1  | HIP | 169 | 16.417 | 42.978 | 4.526  | 0.00 | 0.00 |
| ATOM | 2687 | NE2  | HIP | 169 | 18.299 | 42.754 | 5.352  | 0.00 | 0.00 |
| ATOM | 2688 | HE2  | HIP | 169 | 18.452 | 41.798 | 5.196  | 0.00 | 0.00 |
| ATOM | 2689 | CD2  | HIP | 169 | 19.144 | 43.641 | 5.928  | 0.00 | 0.00 |
| ATOM | 2690 | HD2  | HIP | 169 | 20.079 | 43.432 | 6.305  | 0.00 | 0.00 |
| ATOM | 2691 | C    | HIP | 169 | 20.017 | 48.438 | 5.640  | 0.00 | 0.00 |
| ATOM | 2692 | O    | HIP | 169 | 19.383 | 48.964 | 6.530  | 0.00 | 0.00 |
| ATOM | 2693 | N    | CYS | 170 | 20.924 | 49.116 | 4.946  | 0.00 | 0.00 |
| ATOM | 2694 | H    | CYS | 170 | 21.358 | 48.641 | 4.199  | 0.00 | 0.00 |
| ATOM | 2695 | CA   | CYS | 170 | 21.221 | 50.542 | 5.077  | 0.00 | 0.00 |
| ATOM | 2696 | HA   | CYS | 170 | 22.061 | 50.727 | 4.436  | 0.00 | 0.00 |
| ATOM | 2697 | CB   | CYS | 170 | 20.089 | 51.368 | 4.491  | 0.00 | 0.00 |
| ATOM | 2698 | HB2  | CYS | 170 | 19.234 | 51.133 | 4.847  | 0.00 | 0.00 |
| ATOM | 2699 | HB3  | CYS | 170 | 20.210 | 52.285 | 4.686  | 0.00 | 0.00 |
| ATOM | 2700 | SG   | CYS | 170 | 19.959 | 51.242 | 2.900  | 0.00 | 0.00 |
| ATOM | 2701 | HG   | CYS | 170 | 19.574 | 51.403 | 2.745  | 0.00 | 0.00 |
| ATOM | 2702 | C    | CYS | 170 | 21.685 | 51.024 | 6.459  | 0.00 | 0.00 |
| ATOM | 2703 | O    | CYS | 170 | 21.700 | 52.206 | 6.711  | 0.00 | 0.00 |
| ATOM | 2704 | N    | ILE | 171 | 22.098 | 50.146 | 7.361  | 0.00 | 0.00 |
| ATOM | 2705 | H    | ILE | 171 | 22.139 | 49.206 | 7.097  | 0.00 | 0.00 |
| ATOM | 2706 | CA   | ILE | 171 | 22.501 | 50.503 | 8.727  | 0.00 | 0.00 |
| ATOM | 2707 | HA   | ILE | 171 | 21.859 | 51.303 | 9.070  | 0.00 | 0.00 |
| ATOM | 2708 | CB   | ILE | 171 | 22.318 | 49.320 | 9.700  | 0.00 | 0.00 |
| ATOM | 2709 | HB   | ILE | 171 | 23.045 | 48.581 | 9.475  | 0.00 | 0.00 |
| ATOM | 2710 | CG2  | ILE | 171 | 22.571 | 49.759 | 11.116 | 0.00 | 0.00 |
| ATOM | 2711 | 1HG2 | ILE | 171 | 22.337 | 50.053 | 11.392 | 0.00 | 0.00 |
| ATOM | 2712 | 2HG2 | ILE | 171 | 22.610 | 49.523 | 11.595 | 0.00 | 0.00 |
| ATOM | 2713 | 3HG2 | ILE | 171 | 22.963 | 50.005 | 11.419 | 0.00 | 0.00 |
| ATOM | 2714 | CG1  | ILE | 171 | 20.955 | 48.680 | 9.587  | 0.00 | 0.00 |
| ATOM | 2715 | 2HG1 | ILE | 171 | 20.287 | 49.257 | 9.900  | 0.00 | 0.00 |
| ATOM | 2716 | 3HG1 | ILE | 171 | 20.780 | 48.524 | 8.695  | 0.00 | 0.00 |
| ATOM | 2717 | CD1  | ILE | 171 | 20.665 | 47.444 | 10.215 | 0.00 | 0.00 |
| ATOM | 2718 | 1HD1 | ILE | 171 | 20.569 | 47.066 | 10.132 | 0.00 | 0.00 |
| ATOM | 2719 | 2HD1 | ILE | 171 | 20.819 | 47.135 | 10.480 | 0.00 | 0.00 |
| ATOM | 2720 | 3HD1 | ILE | 171 | 20.368 | 47.231 | 10.477 | 0.00 | 0.00 |
| ATOM | 2721 | C    | ILE | 171 | 23.927 | 51.059 | 8.752  | 0.00 | 0.00 |
| ATOM | 2722 | O    | ILE | 171 | 24.190 | 52.028 | 9.438  | 0.00 | 0.00 |
| ATOM | 2723 | N    | ALA | 172 | 24.839 | 50.524 | 7.944  | 0.00 | 0.00 |
| ATOM | 2724 | H    | ALA | 172 | 24.579 | 49.738 | 7.393  | 0.00 | 0.00 |
| ATOM | 2725 | CA   | ALA | 172 | 26.174 | 51.090 | 7.780  | 0.00 | 0.00 |
| ATOM | 2726 | HA   | ALA | 172 | 26.611 | 51.224 | 8.758  | 0.00 | 0.00 |
| ATOM | 2727 | CB   | ALA | 172 | 27.059 | 50.108 | 7.026  | 0.00 | 0.00 |
| ATOM | 2728 | HB1  | ALA | 172 | 27.282 | 49.813 | 6.910  | 0.00 | 0.00 |
| ATOM | 2729 | HB2  | ALA | 172 | 27.204 | 49.874 | 6.787  | 0.00 | 0.00 |

|      |      |      |     |     |        |        |        |      |      |
|------|------|------|-----|-----|--------|--------|--------|------|------|
| ATOM | 2730 | HB3  | ALA | 172 | 27.356 | 49.935 | 6.835  | 0.00 | 0.00 |
| ATOM | 2731 | C    | ALA | 172 | 26.125 | 52.474 | 7.110  | 0.00 | 0.00 |
| ATOM | 2732 | O    | ALA | 172 | 26.853 | 53.368 | 7.504  | 0.00 | 0.00 |
| ATOM | 2733 | N    | ARG | 173 | 25.202 | 52.700 | 6.179  | 0.00 | 0.00 |
| ATOM | 2734 | H    | ARG | 173 | 24.693 | 51.908 | 5.857  | 0.00 | 0.00 |
| ATOM | 2735 | CA   | ARG | 173 | 24.873 | 54.013 | 5.607  | 0.00 | 0.00 |
| ATOM | 2736 | HA   | ARG | 173 | 25.778 | 54.455 | 5.218  | 0.00 | 0.00 |
| ATOM | 2737 | CB   | ARG | 173 | 23.884 | 53.825 | 4.453  | 0.00 | 0.00 |
| ATOM | 2738 | HB2  | ARG | 173 | 24.216 | 53.017 | 3.859  | 0.00 | 0.00 |
| ATOM | 2739 | HB3  | ARG | 173 | 22.923 | 53.576 | 4.817  | 0.00 | 0.00 |
| ATOM | 2740 | CG   | ARG | 173 | 23.755 | 55.027 | 3.555  | 0.00 | 0.00 |
| ATOM | 2741 | HG2  | ARG | 173 | 23.443 | 55.852 | 4.129  | 0.00 | 0.00 |
| ATOM | 2742 | HG3  | ARG | 173 | 24.699 | 55.246 | 3.151  | 0.00 | 0.00 |
| ATOM | 2743 | CD   | ARG | 173 | 22.760 | 54.828 | 2.429  | 0.00 | 0.00 |
| ATOM | 2744 | HD2  | ARG | 173 | 21.827 | 54.597 | 2.838  | 0.00 | 0.00 |
| ATOM | 2745 | HD3  | ARG | 173 | 22.660 | 55.729 | 1.896  | 0.00 | 0.00 |
| ATOM | 2746 | NE   | ARG | 173 | 23.147 | 53.810 | 1.513  | 0.00 | 0.00 |
| ATOM | 2747 | HE   | ARG | 173 | 23.966 | 53.319 | 1.621  | 0.00 | 0.00 |
| ATOM | 2748 | CZ   | ARG | 173 | 22.533 | 53.441 | 0.539  | 0.00 | 0.00 |
| ATOM | 2749 | NH1  | ARG | 173 | 21.439 | 53.937 | 0.236  | 0.00 | 0.00 |
| ATOM | 2750 | 1HH1 | ARG | 173 | 21.007 | 54.618 | 0.764  | 0.00 | 0.00 |
| ATOM | 2751 | 2HH1 | ARG | 173 | 21.030 | 53.615 | -0.515 | 0.00 | 0.00 |
| ATOM | 2752 | NH2  | ARG | 173 | 23.032 | 52.528 | -0.159 | 0.00 | 0.00 |
| ATOM | 2753 | 1HH2 | ARG | 173 | 23.893 | 52.157 | 0.046  | 0.00 | 0.00 |
| ATOM | 2754 | 2HH2 | ARG | 173 | 22.583 | 52.231 | -0.904 | 0.00 | 0.00 |
| ATOM | 2755 | C    | ARG | 173 | 24.340 | 54.988 | 6.653  | 0.00 | 0.00 |
| ATOM | 2756 | O    | ARG | 173 | 24.768 | 56.125 | 6.676  | 0.00 | 0.00 |
| ATOM | 2757 | N    | TRP | 174 | 23.489 | 54.543 | 7.567  | 0.00 | 0.00 |
| ATOM | 2758 | H    | TRP | 174 | 23.156 | 53.612 | 7.473  | 0.00 | 0.00 |
| ATOM | 2759 | CA   | TRP | 174 | 22.964 | 55.362 | 8.660  | 0.00 | 0.00 |
| ATOM | 2760 | HA   | TRP | 174 | 22.539 | 56.260 | 8.237  | 0.00 | 0.00 |
| ATOM | 2761 | CB   | TRP | 174 | 21.831 | 54.616 | 9.354  | 0.00 | 0.00 |
| ATOM | 2762 | HB2  | TRP | 174 | 21.128 | 54.292 | 8.610  | 0.00 | 0.00 |
| ATOM | 2763 | HB3  | TRP | 174 | 22.218 | 53.736 | 9.830  | 0.00 | 0.00 |
| ATOM | 2764 | CG   | TRP | 174 | 21.082 | 55.399 | 10.369 | 0.00 | 0.00 |
| ATOM | 2765 | CD1  | TRP | 174 | 20.080 | 56.239 | 10.110 | 0.00 | 0.00 |
| ATOM | 2766 | HD1  | TRP | 174 | 19.696 | 56.432 | 9.139  | 0.00 | 0.00 |
| ATOM | 2767 | NE1  | TRP | 174 | 19.611 | 56.785 | 11.277 | 0.00 | 0.00 |
| ATOM | 2768 | HE1  | TRP | 174 | 18.862 | 57.427 | 11.309 | 0.00 | 0.00 |
| ATOM | 2769 | CE2  | TRP | 174 | 20.297 | 56.327 | 12.352 | 0.00 | 0.00 |
| ATOM | 2770 | CZ2  | TRP | 174 | 20.213 | 56.589 | 13.709 | 0.00 | 0.00 |
| ATOM | 2771 | HZ2  | TRP | 174 | 19.501 | 57.282 | 14.082 | 0.00 | 0.00 |
| ATOM | 2772 | CH2  | TRP | 174 | 21.076 | 55.939 | 14.576 | 0.00 | 0.00 |
| ATOM | 2773 | HH2  | TRP | 174 | 21.033 | 56.144 | 15.617 | 0.00 | 0.00 |
| ATOM | 2774 | CZ3  | TRP | 174 | 22.006 | 55.038 | 14.073 | 0.00 | 0.00 |
| ATOM | 2775 | HZ3  | TRP | 174 | 22.671 | 54.549 | 14.734 | 0.00 | 0.00 |
| ATOM | 2776 | CE3  | TRP | 174 | 22.081 | 54.784 | 12.706 | 0.00 | 0.00 |
| ATOM | 2777 | HE3  | TRP | 174 | 22.794 | 54.093 | 12.326 | 0.00 | 0.00 |
| ATOM | 2778 | CD2  | TRP | 174 | 21.239 | 55.424 | 11.808 | 0.00 | 0.00 |
| ATOM | 2779 | C    | TRP | 174 | 24.055 | 55.795 | 9.641  | 0.00 | 0.00 |
| ATOM | 2780 | O    | TRP | 174 | 24.088 | 56.946 | 10.035 | 0.00 | 0.00 |
| ATOM | 2781 | N    | ILE | 175 | 24.997 | 54.915 | 9.975  | 0.00 | 0.00 |
| ATOM | 2782 | H    | ILE | 175 | 24.893 | 53.979 | 9.650  | 0.00 | 0.00 |
| ATOM | 2783 | CA   | ILE | 175 | 26.173 | 55.256 | 10.785 | 0.00 | 0.00 |
| ATOM | 2784 | HA   | ILE | 175 | 25.836 | 55.796 | 11.658 | 0.00 | 0.00 |
| ATOM | 2785 | CB   | ILE | 175 | 26.890 | 53.977 | 11.271 | 0.00 | 0.00 |
| ATOM | 2786 | HB   | ILE | 175 | 27.080 | 53.364 | 10.411 | 0.00 | 0.00 |
| ATOM | 2787 | CG2  | ILE | 175 | 28.237 | 54.269 | 11.914 | 0.00 | 0.00 |
| ATOM | 2788 | 1HG2 | ILE | 175 | 28.726 | 53.960 | 11.906 | 0.00 | 0.00 |
| ATOM | 2789 | 2HG2 | ILE | 175 | 28.628 | 54.701 | 11.845 | 0.00 | 0.00 |
| ATOM | 2790 | 3HG2 | ILE | 175 | 28.370 | 54.347 | 12.458 | 0.00 | 0.00 |
| ATOM | 2791 | CG1  | ILE | 175 | 26.043 | 53.133 | 12.229 | 0.00 | 0.00 |
| ATOM | 2792 | 2HG1 | ILE | 175 | 25.109 | 52.894 | 11.768 | 0.00 | 0.00 |
| ATOM | 2793 | 3HG1 | ILE | 175 | 26.539 | 52.199 | 12.387 | 0.00 | 0.00 |
| ATOM | 2794 | CD1  | ILE | 175 | 25.745 | 53.734 | 13.582 | 0.00 | 0.00 |
| ATOM | 2795 | 1HD1 | ILE | 175 | 25.534 | 54.044 | 13.790 | 0.00 | 0.00 |
| ATOM | 2796 | 2HD1 | ILE | 175 | 25.566 | 53.654 | 13.973 | 0.00 | 0.00 |
| ATOM | 2797 | 3HD1 | ILE | 175 | 25.912 | 53.917 | 13.972 | 0.00 | 0.00 |
| ATOM | 2798 | C    | ILE | 175 | 27.114 | 56.210 | 10.044 | 0.00 | 0.00 |
| ATOM | 2799 | O    | ILE | 175 | 27.612 | 57.145 | 10.647 | 0.00 | 0.00 |
| ATOM | 2800 | N    | ALA | 176 | 27.309 | 56.050 | 8.738  | 0.00 | 0.00 |
| ATOM | 2801 | H    | ALA | 176 | 26.904 | 55.259 | 8.290  | 0.00 | 0.00 |
| ATOM | 2802 | CA   | ALA | 176 | 28.082 | 56.980 | 7.926  | 0.00 | 0.00 |
| ATOM | 2803 | HA   | ALA | 176 | 29.066 | 57.067 | 8.358  | 0.00 | 0.00 |
| ATOM | 2804 | CB   | ALA | 176 | 28.240 | 56.406 | 6.523  | 0.00 | 0.00 |
| ATOM | 2805 | HB1  | ALA | 176 | 28.169 | 56.369 | 6.124  | 0.00 | 0.00 |
| ATOM | 2806 | HB2  | ALA | 176 | 28.443 | 56.324 | 6.199  | 0.00 | 0.00 |
| ATOM | 2807 | HB3  | ALA | 176 | 28.248 | 56.120 | 6.215  | 0.00 | 0.00 |
| ATOM | 2808 | C    | ALA | 176 | 27.470 | 58.385 | 7.900  | 0.00 | 0.00 |
| ATOM | 2809 | O    | ALA | 176 | 28.180 | 59.361 | 8.053  | 0.00 | 0.00 |
| ATOM | 2810 | N    | GLN | 177 | 26.155 | 58.495 | 7.797  | 0.00 | 0.00 |
| ATOM | 2811 | H    | GLN | 177 | 25.641 | 57.662 | 7.640  | 0.00 | 0.00 |
| ATOM | 2812 | CA   | GLN | 177 | 25.415 | 59.753 | 7.869  | 0.00 | 0.00 |
| ATOM | 2813 | HA   | GLN | 177 | 25.889 | 60.469 | 7.221  | 0.00 | 0.00 |
| ATOM | 2814 | CB   | GLN | 177 | 23.996 | 59.535 | 7.363  | 0.00 | 0.00 |
| ATOM | 2815 | HB2  | GLN | 177 | 23.572 | 58.692 | 7.860  | 0.00 | 0.00 |
| ATOM | 2816 | HB3  | GLN | 177 | 23.405 | 60.394 | 7.601  | 0.00 | 0.00 |
| ATOM | 2817 | CG   | GLN | 177 | 23.930 | 59.312 | 5.864  | 0.00 | 0.00 |
| ATOM | 2818 | HG2  | GLN | 177 | 24.244 | 60.188 | 5.384  | 0.00 | 0.00 |
| ATOM | 2819 | HG3  | GLN | 177 | 24.585 | 58.543 | 5.572  | 0.00 | 0.00 |
| ATOM | 2820 | CD   | GLN | 177 | 22.578 | 58.959 | 5.356  | 0.00 | 0.00 |
| ATOM | 2821 | OE1  | GLN | 177 | 21.733 | 58.600 | 5.948  | 0.00 | 0.00 |
| ATOM | 2822 | NE2  | GLN | 177 | 22.316 | 59.035 | 4.239  | 0.00 | 0.00 |
| ATOM | 2823 | 1HE2 | GLN | 177 | 21.432 | 58.823 | 3.903  | 0.00 | 0.00 |
| ATOM | 2824 | 2HE2 | GLN | 177 | 22.988 | 59.338 | 3.728  | 0.00 | 0.00 |
| ATOM | 2825 | C    | GLN | 177 | 25.423 | 60.372 | 9.271  | 0.00 | 0.00 |
| ATOM | 2826 | O    | GLN | 177 | 25.289 | 61.548 | 9.410  | 0.00 | 0.00 |
| ATOM | 2827 | N    | ARG | 178 | 25.649 | 59.601 | 10.311 | 0.00 | 0.00 |
| ATOM | 2828 | H    | ARG | 178 | 25.690 | 58.646 | 10.114 | 0.00 | 0.00 |
| ATOM | 2829 | CA   | ARG | 178 | 25.831 | 60.022 | 11.700 | 0.00 | 0.00 |
| ATOM | 2830 | HA   | ARG | 178 | 25.266 | 60.919 | 11.854 | 0.00 | 0.00 |
| ATOM | 2831 | CB   | ARG | 178 | 25.257 | 58.956 | 12.620 | 0.00 | 0.00 |
| ATOM | 2832 | HB2  | ARG | 178 | 24.868 | 58.307 | 12.250 | 0.00 | 0.00 |
| ATOM | 2833 | HB3  | ARG | 178 | 25.824 | 58.596 | 13.047 | 0.00 | 0.00 |
| ATOM | 2834 | CG   | ARG | 178 | 24.399 | 59.209 | 13.455 | 0.00 | 0.00 |

|      |      |      |     |     |        |        |        |      |      |
|------|------|------|-----|-----|--------|--------|--------|------|------|
| ATOM | 2835 | HG2  | ARG | 178 | 24.641 | 59.495 | 13.933 | 0.00 | 0.00 |
| ATOM | 2836 | HG3  | ARG | 178 | 24.156 | 59.665 | 13.113 | 0.00 | 0.00 |
| ATOM | 2837 | CD   | ARG | 178 | 23.517 | 58.419 | 14.078 | 0.00 | 0.00 |
| ATOM | 2838 | HD2  | ARG | 178 | 22.802 | 58.426 | 13.601 | 0.00 | 0.00 |
| ATOM | 2839 | HD3  | ARG | 178 | 23.847 | 57.596 | 13.973 | 0.00 | 0.00 |
| ATOM | 2840 | NE   | ARG | 178 | 23.165 | 58.678 | 15.426 | 0.00 | 0.00 |
| ATOM | 2841 | HE   | ARG | 178 | 23.680 | 58.260 | 16.120 | 0.00 | 0.00 |
| ATOM | 2842 | CZ   | ARG | 178 | 22.168 | 59.323 | 15.844 | 0.00 | 0.00 |
| ATOM | 2843 | NH1  | ARG | 178 | 21.954 | 59.390 | 17.064 | 0.00 | 0.00 |
| ATOM | 2844 | 1HH1 | ARG | 178 | 22.545 | 58.950 | 17.676 | 0.00 | 0.00 |
| ATOM | 2845 | 2HH1 | ARG | 178 | 21.207 | 59.878 | 17.390 | 0.00 | 0.00 |
| ATOM | 2846 | NH2  | ARG | 178 | 21.362 | 59.899 | 15.099 | 0.00 | 0.00 |
| ATOM | 2847 | 1HH2 | ARG | 178 | 21.473 | 59.887 | 14.148 | 0.00 | 0.00 |
| ATOM | 2848 | 2HH2 | ARG | 178 | 20.630 | 60.371 | 15.473 | 0.00 | 0.00 |
| ATOM | 2849 | C    | ARG | 178 | 27.273 | 60.391 | 12.049 | 0.00 | 0.00 |
| ATOM | 2850 | O    | ARG | 178 | 27.549 | 60.727 | 13.160 | 0.00 | 0.00 |
| ATOM | 2851 | N    | GLY | 179 | 28.181 | 60.349 | 11.106 | 0.00 | 0.00 |
| ATOM | 2852 | H    | GLY | 179 | 27.864 | 60.071 | 10.226 | 0.00 | 0.00 |
| ATOM | 2853 | CA   | GLY | 179 | 29.579 | 60.737 | 11.232 | 0.00 | 0.00 |
| ATOM | 2854 | HA2  | GLY | 179 | 29.876 | 61.203 | 10.321 | 0.00 | 0.00 |
| ATOM | 2855 | HA3  | GLY | 179 | 29.679 | 61.456 | 12.016 | 0.00 | 0.00 |
| ATOM | 2856 | C    | GLY | 179 | 30.561 | 59.613 | 11.504 | 0.00 | 0.00 |
| ATOM | 2857 | O    | GLY | 179 | 31.697 | 59.889 | 11.799 | 0.00 | 0.00 |
| ATOM | 2858 | N    | GLY | 180 | 30.152 | 58.364 | 11.408 | 0.00 | 0.00 |
| ATOM | 2859 | H    | GLY | 180 | 29.206 | 58.213 | 11.175 | 0.00 | 0.00 |
| ATOM | 2860 | CA   | GLY | 180 | 30.952 | 57.193 | 11.757 | 0.00 | 0.00 |
| ATOM | 2861 | HA2  | GLY | 180 | 30.633 | 56.366 | 11.160 | 0.00 | 0.00 |
| ATOM | 2862 | HA3  | GLY | 180 | 31.983 | 57.376 | 11.544 | 0.00 | 0.00 |
| ATOM | 2863 | C    | GLY | 180 | 30.826 | 56.783 | 13.211 | 0.00 | 0.00 |
| ATOM | 2864 | O    | GLY | 180 | 30.220 | 57.467 | 14.002 | 0.00 | 0.00 |
| ATOM | 2865 | N    | TRP | 181 | 31.394 | 55.649 | 13.583 | 0.00 | 0.00 |
| ATOM | 2866 | H    | TRP | 181 | 31.918 | 55.154 | 12.907 | 0.00 | 0.00 |
| ATOM | 2867 | CA   | TRP | 181 | 31.209 | 55.023 | 14.894 | 0.00 | 0.00 |
| ATOM | 2868 | HA   | TRP | 181 | 30.150 | 54.895 | 15.044 | 0.00 | 0.00 |
| ATOM | 2869 | CB   | TRP | 181 | 31.827 | 53.629 | 14.887 | 0.00 | 0.00 |
| ATOM | 2870 | HB2  | TRP | 181 | 32.729 | 53.638 | 14.327 | 0.00 | 0.00 |
| ATOM | 2871 | HB3  | TRP | 181 | 32.084 | 53.356 | 15.881 | 0.00 | 0.00 |
| ATOM | 2872 | CG   | TRP | 181 | 30.945 | 52.558 | 14.386 | 0.00 | 0.00 |
| ATOM | 2873 | CD1  | TRP | 181 | 31.061 | 51.921 | 13.230 | 0.00 | 0.00 |
| ATOM | 2874 | HD1  | TRP | 181 | 31.813 | 52.111 | 12.511 | 0.00 | 0.00 |
| ATOM | 2875 | NE1  | TRP | 181 | 30.064 | 51.003 | 13.108 | 0.00 | 0.00 |
| ATOM | 2876 | HE1  | TRP | 181 | 29.964 | 50.408 | 12.326 | 0.00 | 0.00 |
| ATOM | 2877 | CE2  | TRP | 181 | 29.242 | 51.012 | 14.186 | 0.00 | 0.00 |
| ATOM | 2878 | CZ2  | TRP | 181 | 28.110 | 50.298 | 14.519 | 0.00 | 0.00 |
| ATOM | 2879 | HZ2  | TRP | 181 | 27.730 | 49.570 | 13.857 | 0.00 | 0.00 |
| ATOM | 2880 | CH2  | TRP | 181 | 27.498 | 50.534 | 15.731 | 0.00 | 0.00 |
| ATOM | 2881 | HH2  | TRP | 181 | 26.646 | 49.978 | 16.009 | 0.00 | 0.00 |
| ATOM | 2882 | CZ3  | TRP | 181 | 28.014 | 51.484 | 16.585 | 0.00 | 0.00 |
| ATOM | 2883 | HZ3  | TRP | 181 | 27.540 | 51.663 | 17.510 | 0.00 | 0.00 |
| ATOM | 2884 | CE3  | TRP | 181 | 29.140 | 52.210 | 16.238 | 0.00 | 0.00 |
| ATOM | 2885 | HE3  | TRP | 181 | 29.517 | 52.945 | 16.894 | 0.00 | 0.00 |
| ATOM | 2886 | CD2  | TRP | 181 | 29.791 | 51.988 | 15.031 | 0.00 | 0.00 |
| ATOM | 2887 | C    | TRP | 181 | 31.691 | 55.836 | 16.092 | 0.00 | 0.00 |
| ATOM | 2888 | O    | TRP | 181 | 31.055 | 55.788 | 17.123 | 0.00 | 0.00 |
| ATOM | 2889 | N    | VAL | 182 | 32.755 | 56.615 | 15.964 | 0.00 | 0.00 |
| ATOM | 2890 | H    | VAL | 182 | 33.198 | 56.650 | 15.084 | 0.00 | 0.00 |
| ATOM | 2891 | CA   | VAL | 182 | 33.251 | 57.470 | 17.050 | 0.00 | 0.00 |
| ATOM | 2892 | HA   | VAL | 182 | 33.279 | 56.882 | 17.953 | 0.00 | 0.00 |
| ATOM | 2893 | CB   | VAL | 182 | 34.669 | 57.962 | 16.768 | 0.00 | 0.00 |
| ATOM | 2894 | HB   | VAL | 182 | 34.656 | 58.579 | 15.920 | 0.00 | 0.00 |
| ATOM | 2895 | CG1  | VAL | 182 | 35.242 | 58.748 | 17.889 | 0.00 | 0.00 |
| ATOM | 2896 | 1HG1 | VAL | 182 | 35.582 | 59.045 | 18.002 | 0.00 | 0.00 |
| ATOM | 2897 | 2HG1 | VAL | 182 | 35.433 | 58.724 | 18.301 | 0.00 | 0.00 |
| ATOM | 2898 | 3HG1 | VAL | 182 | 35.150 | 59.067 | 18.174 | 0.00 | 0.00 |
| ATOM | 2899 | CG2  | VAL | 182 | 35.628 | 56.850 | 16.510 | 0.00 | 0.00 |
| ATOM | 2900 | 1HG2 | VAL | 182 | 36.073 | 56.762 | 16.542 | 0.00 | 0.00 |
| ATOM | 2901 | 2HG2 | VAL | 182 | 35.798 | 56.578 | 16.163 | 0.00 | 0.00 |
| ATOM | 2902 | 3HG2 | VAL | 182 | 35.721 | 56.410 | 16.625 | 0.00 | 0.00 |
| ATOM | 2903 | C    | VAL | 182 | 32.308 | 58.637 | 17.309 | 0.00 | 0.00 |
| ATOM | 2904 | O    | VAL | 182 | 32.050 | 58.958 | 18.434 | 0.00 | 0.00 |
| ATOM | 2905 | N    | ALA | 183 | 31.726 | 59.219 | 16.286 | 0.00 | 0.00 |
| ATOM | 2906 | H    | ALA | 183 | 31.967 | 58.909 | 15.393 | 0.00 | 0.00 |
| ATOM | 2907 | CA   | ALA | 183 | 30.734 | 60.266 | 16.400 | 0.00 | 0.00 |
| ATOM | 2908 | HA   | ALA | 183 | 31.060 | 60.964 | 17.147 | 0.00 | 0.00 |
| ATOM | 2909 | CB   | ALA | 183 | 30.662 | 60.993 | 15.081 | 0.00 | 0.00 |
| ATOM | 2910 | HB1  | ALA | 183 | 30.272 | 61.418 | 14.920 | 0.00 | 0.00 |
| ATOM | 2911 | HB2  | ALA | 183 | 31.073 | 61.344 | 14.823 | 0.00 | 0.00 |
| ATOM | 2912 | HB3  | ALA | 183 | 30.578 | 60.766 | 14.542 | 0.00 | 0.00 |
| ATOM | 2913 | C    | ALA | 183 | 29.364 | 59.743 | 16.830 | 0.00 | 0.00 |
| ATOM | 2914 | O    | ALA | 183 | 28.707 | 60.363 | 17.631 | 0.00 | 0.00 |
| ATOM | 2915 | N    | ALA | 184 | 28.955 | 58.586 | 16.354 | 0.00 | 0.00 |
| ATOM | 2916 | H    | ALA | 184 | 29.510 | 58.150 | 15.666 | 0.00 | 0.00 |
| ATOM | 2917 | CA   | ALA | 184 | 27.686 | 57.975 | 16.690 | 0.00 | 0.00 |
| ATOM | 2918 | HA   | ALA | 184 | 26.917 | 58.705 | 16.528 | 0.00 | 0.00 |
| ATOM | 2919 | CB   | ALA | 184 | 27.447 | 56.813 | 15.747 | 0.00 | 0.00 |
| ATOM | 2920 | HB1  | ALA | 184 | 27.893 | 56.234 | 15.780 | 0.00 | 0.00 |
| ATOM | 2921 | HB2  | ALA | 184 | 26.803 | 56.447 | 15.785 | 0.00 | 0.00 |
| ATOM | 2922 | HB3  | ALA | 184 | 27.454 | 56.917 | 15.016 | 0.00 | 0.00 |
| ATOM | 2923 | C    | ALA | 184 | 27.580 | 57.553 | 18.150 | 0.00 | 0.00 |
| ATOM | 2924 | O    | ALA | 184 | 26.515 | 57.637 | 18.713 | 0.00 | 0.00 |
| ATOM | 2925 | N    | LEU | 185 | 28.678 | 57.166 | 18.781 | 0.00 | 0.00 |
| ATOM | 2926 | H    | LEU | 185 | 29.509 | 57.081 | 18.254 | 0.00 | 0.00 |
| ATOM | 2927 | CA   | LEU | 185 | 28.743 | 56.845 | 20.194 | 0.00 | 0.00 |
| ATOM | 2928 | HA   | LEU | 185 | 27.962 | 56.184 | 20.411 | 0.00 | 0.00 |
| ATOM | 2929 | CB   | LEU | 185 | 30.046 | 56.158 | 20.486 | 0.00 | 0.00 |
| ATOM | 2930 | HB2  | LEU | 185 | 30.175 | 55.365 | 19.840 | 0.00 | 0.00 |
| ATOM | 2931 | HB3  | LEU | 185 | 30.792 | 56.819 | 20.289 | 0.00 | 0.00 |
| ATOM | 2932 | CG   | LEU | 185 | 30.228 | 55.647 | 21.867 | 0.00 | 0.00 |
| ATOM | 2933 | HG   | LEU | 185 | 30.075 | 56.405 | 22.514 | 0.00 | 0.00 |
| ATOM | 2934 | CD1  | LEU | 185 | 29.336 | 54.606 | 22.203 | 0.00 | 0.00 |
| ATOM | 2935 | 1HD1 | LEU | 185 | 28.900 | 54.523 | 22.218 | 0.00 | 0.00 |
| ATOM | 2936 | 2HD1 | LEU | 185 | 29.190 | 54.321 | 22.558 | 0.00 | 0.00 |
| ATOM | 2937 | 3HD1 | LEU | 185 | 29.261 | 54.228 | 22.097 | 0.00 | 0.00 |
| ATOM | 2938 | CD2  | LEU | 185 | 31.557 | 55.122 | 22.081 | 0.00 | 0.00 |
| ATOM | 2939 | 1HD2 | LEU | 185 | 31.849 | 54.976 | 22.201 | 0.00 | 0.00 |
